# Supplementary material for: Loss of tolerance to multiple environmental stresses due to limitation of structural diversity of complex sphingolipids
Source: PubMed Central journal article supplement — Mol Biol Cell. 2022 Sep 22;33(12):ar105. doi: 10.1091/mbc.E22-04-0117 (PMC9635301; doi:10.1091/mbc.e22-04-0117), 2022-09-22
Supplement: mbc-33-ar105-s001.pdf [file mbc-33-ar105-s001.pdf]

**SUPPLEMENTAL MATERIALS**

*Molecular Biology of the Cell*

*Koga et al.*

**Table S1.** RNA-sequencing of wild-type and *ccssΔ* cells

Red represents genes that upregulated in *ccssΔ* cells and annotated as GO:0071554.

| GeneSymbol | Wild type1 | Wild type2 | Wild type3 | ccss1      | ccss2      | ccss3      | logFC       | logCPM     | PValue      | GeneName  |
|------------|------------|------------|------------|------------|------------|------------|-------------|------------|-------------|-----------|
| YGR031C-A  | 0          | 0          | 0          | 1.41908741 | 0          | 0          | 5.973733575 | -1.4297381 | 0.00071021  | NAG1      |
| YMR158W-B  | 0          | 0          | 0          | 0.47302914 | 0.58640978 | 0.12912051 | 5.709637133 | -1.6431574 | 1.15855E-05 | YMR158W-B |
| YEL077W-A  | 0          | 0          | 0          | 1.00518691 | 0          | 0.06456026 | 5.584221329 | -1.6921334 | 0.000738213 | YEL077W-A |
| YBL068W-A  | 0          | 0          | 0          | 0.76867235 | 0          | 0.25824103 | 5.53298873  | -1.7404795 | 9.79972E-05 | YBL068W-A |
| YBL113W-A  | 0          | 0          | 0          | 0.7095437  | 0          | 0          | 5.024793416 | -2.0137365 | 0.00267049  | YBL113W-A |
| YNL017C    | 0          | 0          | 0          | 0.17738593 | 0.19546993 | 0.25824103 | 4.810354712 | -2.1379176 | 0.002518438 | YNL017C   |
| YLR286W-A  | 0          | 0          | 0          | 0.47302914 | 0          | 0          | 4.486852731 | -2.2764429 | 0.010584958 | YLR286W-A |
| YPL102C    | 0          | 0.05755739 | 0          | 0.41390049 | 0.13031328 | 0.19368077 | 3.201064037 | -1.9541351 | 0.004742487 | YPL102C   |
| YFL063W    | 0          | 0.05755739 | 0          | 0          | 0.13031328 | 0.15648206 | 2.958369604 | -2.0734524 | 0.016182552 | YFL063W   |
| YBR056W-A  | 0.26304628 | 0.4029017  | 0.18157716 | 2.30601704 | 2.41079576 | 2.00136798 | 2.941557495 | 0.45944827 | 2.33086E-14 | YBR056W-A |
| YOL013W-B  | 0          | 0.05755739 | 0          | 0.23651457 | 0.06515664 | 0.25824103 | 2.802994177 | -2.1383278 | 0.025550598 | YOL013W-B |
| YBR266C    | 0          | 0.17267216 | 1.33156586 | 9.04668223 | 0          | 0.25824103 | 2.608933103 | 0.99100996 | 0.006029487 | SLM6      |
| YMR031W-A  | 0          | 0          | 0.06052572 | 0.23651457 | 0          | 0.12912051 | 2.243547768 | -2.3499901 | 0.13351439  | YMR031W-A |
| YGR032W    | 345.182485 | 260.504725 | 350.746552 | 1314.42971 | 1430.64439 | 1444.40664 | 2.131143532 | 9.74431477 | 1.80906E-68 | GSC2      |
| YLR157W-D  | 0          | 0.05755739 | 0.06052572 | 0.29564321 | 0.26062657 | 0          | 2.015794914 | -2.0743495 | 0.07556089  | YLR157W-D |
| YBL111C    | 6.57615709 | 1.26626247 | 0.12105144 | 27.7313331 | 2.9320489  | 1.42032566 | 2.011184159 | 2.7810158  | 0.025216396 | YBL111C   |
| YJR120W    | 0.06576157 | 0          | 0          | 0.05912864 | 0.06515664 | 0.19368077 | 2.000010809 | -2.4274151 | 0.227428225 | YJR120W   |
| YPL135C-A  | 0.06576157 | 0.17267216 | 0          | 0.82780099 | 0.13031328 | 0          | 1.916778425 | -1.5989553 | 0.041957626 | YPL135C-A |
| YKL165C-A  | 0.13152314 | 0          | 0          | 0.23651457 | 0.19546993 | 0.06456026 | 1.850022229 | -2.1380153 | 0.120674898 | YKL165C-A |
| YDL172C    | 1.31523142 | 1.1511477  | 1.87629734 | 7.92323803 | 2.73657898 | 4.58377827 | 1.810288735 | 1.76630827 | 1.2274E-06  | YDL172C   |
| YIR041W    | 0          | 0          | 0.24210288 | 0.29564321 | 0.19546993 | 0.32280129 | 1.649938117 | -1.7396106 | 0.061860273 | PAU15     |
| YHR145C    | 0          | 0.17267216 | 0          | 0          | 0.58640978 | 0          | 1.536176787 | -2.0122892 | 0.196425317 | YHR145C   |
| YGR043C    | 4.34026368 | 4.83482035 | 4.41837762 | 13.2448158 | 13.0964851 | 12.5246899 | 1.512382065 | 3.14475567 | 4.57686E-21 | NQM1      |
| YPL222C-A  | 0.19728471 | 0          | 0          | 0          | 0          | 0.58104232 | 1.510273759 | -2.0116941 | 0.197929177 | YPL222C-A |
| YMR316W    | 10.4560898 | 9.95742763 | 12.2867213 | 32.5207531 | 30.2978387 | 29.0521158 | 1.49034983  | 4.38241647 | 1.25946E-30 | DIA1      |
| YKL161C    | 9.79847406 | 10.014985  | 10.0472697 | 26.6670175 | 27.3006331 | 27.6963504 | 1.450176177 | 4.22303162 | 1.20611E-30 | KDX1      |
| YNL332W    | 1.44675456 | 0.86336078 | 0.90788581 | 2.71991753 | 2.73657898 | 2.90521158 | 1.384480935 | 1.02729295 | 1.30511E-06 | THH2      |
| YBR005W    | 15.9800617 | 17.4974451 | 16.039316  | 38.9657751 | 47.4991922 | 42.5452095 | 1.379402358 | 4.89871126 | 2.94985E-32 | RCR1      |
| YJR108W    | 0.13152314 | 0.28778693 | 0.12105144 | 0.47302914 | 0.52125314 | 0.4519218  | 1.359608955 | -1.1381516 | 0.030953373 | ABM1      |
| YDL163W    | 0          | 0.63313124 | 0          | 0          | 0.78187971 | 0.9038436  | 1.34320349  | -0.9822515 | 0.187046726 | YDL163W   |
| YKL102C    | 0.460331   | 0.17267216 | 0.24210288 | 0.59128642 | 0.97734963 | 0.64560257 | 1.337264608 | -0.6654244 | 0.007279723 | YKL102C   |
| YOR068C    | 1.24946985 | 0.34534431 | 0.3026286  | 2.12863111 | 1.6940727  | 0.83928334 | 1.317822079 | 0.27412689 | 0.005199384 | VAM10     |
| YNL160W    | 171.834985 | 127.950067 | 150.043262 | 377.595508 | 361.814834 | 375.934378 | 1.31046582  | 8.02752553 | 5.53805E-33 | YGP1      |
| YJL107C    | 10.1930435 | 9.38185378 | 11.2577841 | 25.0114156 | 23.6518611 | 27.5026696 | 1.304665109 | 4.16373541 | 1.18557E-21 | YJL107C   |
| YCR081C-A  | 0.78913885 | 0.23022954 | 0.24210288 | 0.53215778 | 1.2379762  | 1.29120515 | 1.28543115  | -0.2726998 | 0.007011879 | YCR081C-A |
| YLR194C    | 58.7908444 | 60.6654839 | 61.4336066 | 119.676371 | 153.052953 | 165.855301 | 1.277115536 | 6.69072807 | 3.62142E-30 | YLR194C   |
| YJL108C    | 13.0865526 | 11.8568213 | 12.9525043 | 28.086105  | 32.9041043 | 30.3433209 | 1.268950726 | 4.43404645 | 1.91714E-24 | PRM10     |
| YLR121C    | 113.307187 | 82.3646181 | 110.88312  | 226.580956 | 252.547145 | 258.822071 | 1.267758023 | 7.44410344 | 1.69438E-26 | YPS3      |
| YMR254C    | 0.65761571 | 0.28778693 | 0.48420577 | 0.7095437  | 1.82438598 | 0.9038436  | 1.260119713 | -0.1192772 | 0.00511039  | YMR254C   |
| YLR296W    | 0.26304628 | 0          | 0.84736009 | 0.29564321 | 1.30313285 | 1.09752437 | 1.259791342 | -0.4251928 | 0.059804209 | YLR296W   |
| YGR164W    | 0.460331   | 0.17267216 | 0.06052572 | 0.35477185 | 0.78187971 | 0.51648206 | 1.251505259 | -0.9814259 | 0.0374294   | YGR164W   |
| YOL151W    | 101.009773 | 88.8110453 | 87.1570379 | 217.889046 | 207.067809 | 218.923832 | 1.217528309 | 7.26261913 | 7.13308E-42 | GRE2      |
| YJR162C    | 0.13152314 | 0.17267216 | 0.06052572 | 0.29564321 | 0.19546993 | 0.38736154 | 1.211949665 | -1.59758   | 0.136093763 | YJR162C   |
| YMR316C-A  | 0.98642356 | 1.26626247 | 1.4526173  | 2.30601704 | 3.45330204 | 2.90521158 | 1.210005304 | 1.1190857  | 2.05575E-05 | YMR316C-A |
| YMR105W-A  | 0.19728471 | 0.11511477 | 0.06052572 | 0.35477185 | 0.39093985 | 0.12912051 | 1.208830459 | -1.597448  | 0.137377045 | YMR105W-A |
| YEL060C    | 211.686497 | 174.053533 | 206.211131 | 460.552993 | 452.512881 | 446.305058 | 1.199627242 | 8.34561375 | 6.94866E-34 | PRB1      |
| YKR091W    | 9.9299972  | 8.46093562 | 9.0183324  | 19.0985514 | 20.6546556 | 22.7897708 | 1.190787524 | 3.9140145  | 2.40815E-16 | SRL3      |
| YGL166W    | 16.1773464 | 15.9433957 | 13.6182872 | 42.0404645 | 34.0769239 | 27.6963504 | 1.183440491 | 4.64630211 | 1.71656E-14 | CUP2      |
| YPR036W-A  | 8.54900421 | 5.98596805 | 5.8104692  | 19.3350659 | 15.2466543 | 11.1689245 | 1.172701668 | 3.47610315 | 2.03755E-07 | SPO24     |
| YCL048W-A  | 0.06576157 | 0          | 0.12105144 | 0.29564321 | 0.06515664 | 0.06456026 | 1.159422773 | -2.1384788 | 0.360060485 | YCL048W-A |
| YHR094C    | 370.89526  | 290.261893 | 398.561871 | 692.573784 | 797.582458 | 874.533245 | 1.158010304 | 9.15681477 | 6.86429E-20 | HXT1      |
| YPL056C    | 1.77556241 | 2.07206587 | 2.36050311 | 3.6659758  | 4.43065167 | 4.81042315 | 1.154363919 | 1.78963939 | 3.78944E-06 | LCL1      |
| YMR008C    | 136.06069  | 112.352016 | 139.209158 | 269.922251 | 282.193418 | 292.845327 | 1.124468894 | 7.68300637 | 1.3639E-28  | PLB1      |
| YGR243W    | 3.81417111 | 4.20168912 | 3.57101753 | 8.57365309 | 7.68848379 | 8.97387576 | 1.120401269 | 2.64328853 | 6.30702E-10 | MPC3      |
| YKL178C    | 2.95927069 | 3.05054141 | 3.02628604 | 6.97717976 | 6.25503766 | 6.32690521 | 1.112864432 | 2.28685503 | 4.95044E-09 | STE3      |
| YNL093W    | 0.72337728 | 0.74824601 | 1.63419446 | 1.89211654 | 2.47595241 | 2.38872952 | 1.108946024 | 0.81363835 | 0.000579299 | YPT53     |
| YJL225W-A  | 1.24946985 | 1.43893463 | 1.27104014 | 5.79460692 | 1.2379762  | 1.42032566 | 1.094975452 | 1.15184624 | 0.029143769 | YJL225W-A |
| YIL177W-A  | 1.24946985 | 1.43893463 | 1.27104014 | 5.79460692 | 1.2379762  | 1.42032566 | 1.094973842 | 1.15184624 | 0.029166651 | YIL177W-A |
| YHR213W-B  | 0.26304628 | 0.57557385 | 0.66578293 | 1.89211654 | 0.58640978 | 0.71016283 | 1.073836405 | -0.1240525 | 0.022959757 | YHR213W-B |
| YLR099C    | 117.976258 | 99.0562598 | 113.848881 | 227.7044   | 227.657308 | 239.583115 | 1.070955906 | 7.41825798 | 5.43782E-30 | ICT1      |
| YHR030C    | 47.5456157 | 60.3201396 | 52.9600057 | 107.850643 | 106.53111  | 120.017518 | 1.054700326 | 6.3686929  | 2.88472E-26 | SLT2      |
| YJL133C-A  | 0.85490042 | 0.28778693 | 0.36315432 | 1.06431556 | 0.97734963 | 1.03296412 | 1.050299154 | -0.1866911 | 0.011984118 | YJL133C-A |
| YPL088W    | 11.1137055 | 14.2742315 | 13.3761843 | 25.6618306 | 29.3856457 | 24.4037772 | 1.032024459 | 4.3078574  | 1.27231E-13 | YPL088W   |
| YLR327C    | 1.44675456 | 1.03603293 | 0.24210288 | 2.60166025 | 1.62891606 | 1.29120515 | 1.027404974 | 0.58237075 | 0.019282514 | TMA10     |
| YFL058W    | 0.39456943 | 0.23022954 | 0.3026286  | 0.59128642 | 0.78187971 | 0.51648206 | 1.02055336  | -0.7639651 | 0.056593003 | THI5      |
| YLR414C    | 52.0174026 | 47.081941  | 55.5626117 | 97.3848734 | 102.295928 | 109.946118 | 1.001511031 | 6.27541046 | 1.57067E-27 | PUN1      |
| YLR120C    | 172.098031 | 138.310396 | 173.890396 | 299.368314 | 336.85984  | 332.033403 | 0.999667398 | 7.91982363 | 8.37317E-21 | YPS1      |
| YOL150C    | 0.78913885 | 0.86336078 | 0.42368005 | 1.1234442  | 0.97734963 | 2.06592823 | 0.993028897 | 0.21093712 | 0.009781836 | YOL150C   |

|           |            |            |            |            |            |            |              |            |             |           |
|-----------|------------|------------|------------|------------|------------|------------|--------------|------------|-------------|-----------|
| YGR189C   | 468.353908 | 378.900266 | 446.437717 | 787.179611 | 851.010905 | 935.413567 | 0.992361166  | 9.33229373 | 6.75242E-20 | CRH1      |
| YGR144W   | 3.28807854 | 3.33832834 | 3.14733748 | 6.26763605 | 5.8640978  | 7.29530907 | 0.988847735  | 2.31498777 | 3.31789E-07 | TH4       |
| YJR157W   | 0.06576157 | 0          | 0.24210288 | 0.23651457 | 0.26062657 | 0.12912051 | 0.985522809  | -1.8426517 | 0.325243269 | YJR157W   |
| YIL117C   | 37.3525723 | 43.4558258 | 38.1917298 | 75.6255331 | 75.9726449 | 82.8308101 | 0.976812657  | 5.88268454 | 1.32936E-25 | PRM5      |
| YKL177W   | 0.13152314 | 0          | 0.12105144 | 0.05912864 | 0.13031328 | 0.32280129 | 0.974773012  | -2.0120919 | 0.405795843 | YKL177W   |
| YBR109W-A | 0          | 0          | 0.18157716 | 0          | 0.26062657 | 0.12912051 | 0.958853797  | -2.2049609 | 0.521691521 | YBR109W-A |
| YOR199W   | 0.32880785 | 0.28778693 | 0.12105144 | 0.35477185 | 0.58640978 | 0.51648206 | 0.958556352  | -1.0423387 | 0.118922565 | YOR199W   |
| YHL050C   | 38.3389958 | 30.6205289 | 35.770701  | 72.018686  | 63.2670996 | 66.1742637 | 0.945567232  | 5.67598122 | 8.63812E-20 | YHL050C   |
| YBR203W   | 22.6219804 | 21.2386751 | 21.244528  | 40.5031198 | 41.8305643 | 42.8680108 | 0.943662498  | 4.99131516 | 7.05356E-21 | COS111    |
| YNL336W   | 61.8816382 | 43.3982684 | 56.1073432 | 102.115165 | 103.664218 | 103.812894 | 0.941033937  | 6.29592042 | 4.31087E-17 | COS1      |
| YMR034C   | 13.6784067 | 10.6481163 | 11.3183098 | 21.7593403 | 21.8274752 | 24.080976  | 0.926961213  | 4.113178   | 3.53221E-11 | YMR034C   |
| YFL066C   | 7.62834222 | 4.54703343 | 4.78153194 | 13.0083012 | 10.6205327 | 8.32827319 | 0.919683252  | 3.04588872 | 0.00010371  | YFL066C   |
| YPR096C   | 0          | 0.11511477 | 0          | 0.05912864 | 0.06515664 | 0.12912051 | 0.919402232  | -2.4278802 | 0.693222535 | YPR096C   |
| YBR064W   | 0.13152314 | 0.34534431 | 0          | 0.29564321 | 0.32578321 | 0.32280129 | 0.919083421  | -1.4685495 | 0.241262203 | YBR064W   |
| YMR001C-A | 0          | 0.05755739 | 0.06052572 | 0.05912864 | 0.13031328 | 0.06456026 | 0.918583155  | -2.4277662 | 0.693030994 | YMR001C-A |
| YER181C   | 0          | 0.05755739 | 0.06052572 | 0.11825728 | 0.13031328 | 0          | 0.9171119816 | -2.4279296 | 0.693249906 | YER181C   |
| YMR322C   | 0          | 0.05755739 | 0.06052572 | 0.11825728 | 0.13031328 | 0          | 0.917119444  | -2.4279296 | 0.693244284 | SN04      |
| YDL184C   | 0.13152314 | 0          | 0          | 0          | 0.19546993 | 0.06456026 | 0.916577571  | -2.4271865 | 0.693575158 | RPL41A    |
| YIL057C   | 0          | 0          | 0.12105144 | 0.11825728 | 0.06515664 | 0.06456026 | 0.916058463  | -2.4278483 | 0.693190979 | RG12      |
| YJL222W-A | 0          | 0.05755739 | 0.06052572 | 0.17738593 | 0.06515664 | 0          | 0.915399129  | -2.4281092 | 0.693406717 | YJL222W-A |
| YOR396C-A | 0.13152314 | 0          | 0          | 0.11825728 | 0.06515664 | 0.06456026 | 0.913273686  | -2.4275459 | 0.693150254 | YOR396C-A |
| YLR467C-A | 0.13152314 | 0          | 0          | 0.11825728 | 0.06515664 | 0.06456026 | 0.913264668  | -2.4275459 | 0.693165002 | YLR467C-A |
| YLR466C-A | 0.13152314 | 0          | 0          | 0.11825728 | 0.06515664 | 0.06456026 | 0.913252937  | -2.4275459 | 0.693184233 | YLR466C-A |
| YLR158C   | 81.675871  | 65.903206  | 76.5045111 | 132.862059 | 139.500371 | 143.711133 | 0.893430086  | 6.73835828 | 2.37684E-21 | ASP3-3    |
| YLR157C   | 81.675871  | 65.903206  | 76.5045111 | 132.862059 | 139.500371 | 143.711133 | 0.89342999   | 6.73835828 | 2.39254E-21 | ASP3-2    |
| YLR155C   | 81.675871  | 65.903206  | 76.5045111 | 132.862059 | 139.500371 | 143.711133 | 0.893429922  | 6.73835828 | 2.40382E-21 | ASP3-1    |
| YLR160C   | 81.675871  | 65.903206  | 76.5045111 | 132.862059 | 139.500371 | 143.711133 | 0.893429854  | 6.73835828 | 2.41504E-21 | ASP3-4    |
| YOR220W   | 25.7785358 | 33.325726  | 24.3313398 | 50.377603  | 51.9298439 | 51.7773263 | 0.883086702  | 5.31084408 | 6.07234E-14 | RCN2      |
| YPL095C   | 73.4556747 | 68.8386326 | 70.028259  | 122.514546 | 133.31049  | 134.930938 | 0.880042209  | 6.65242234 | 1.35459E-25 | EEB1      |
| YJR159W   | 3.55112483 | 3.28077095 | 3.02628604 | 6.62240791 | 6.05956773 | 5.42306161 | 0.879133971  | 2.2557127  | 8.43499E-06 | SOR1      |
| YIL028W   | 0.92066199 | 1.20870509 | 1.02893725 | 1.8329879  | 2.28048248 | 1.74312695 | 0.877764947  | 0.69774783 | 0.003991775 | YIL028W   |
| YNL276C   | 1.24946985 | 0.74824601 | 0.78683437 | 1.89211654 | 1.6940727  | 1.48488592 | 0.876152309  | 0.51213625 | 0.00817472  | YNL276C   |
| YMR323W   | 0.13152314 | 0.05755739 | 0.18157716 | 0.29564321 | 0.32578321 | 0.06456026 | 0.87121165   | -1.7396102 | 0.358141229 | ERR3      |
| YGL165C   | 9.40390463 | 13.4108707 | 13.01303   | 19.8672237 | 25.0201506 | 20.6592823 | 0.867373574  | 4.08768351 | 9.93798E-08 | YGL165C   |
| YJL094C   | 138.756915 | 117.53218  | 134.548677 | 226.226184 | 242.643336 | 240.680639 | 0.860574499  | 7.51945395 | 8.87891E-20 | KHA1      |
| YMR007W   | 0.19728471 | 0.74824601 | 1.27104014 | 1.18257284 | 1.43344613 | 1.48488592 | 0.859696393  | 0.23520652 | 0.031299831 | YMR007W   |
| YOR121C   | 0.39456943 | 0.05755739 | 0.18157716 | 0.47302914 | 0.58640978 | 0.06456026 | 0.853638275  | -1.2750969 | 0.23567036  | YOR121C   |
| YML122C   | 1.31523142 | 1.38137724 | 1.63419446 | 2.77904617 | 2.73657898 | 2.32416926 | 0.852442759  | 1.10346092 | 0.001594931 | YML122C   |
| YLR099W-A | 4.99787939 | 4.71970558 | 3.08681176 | 8.27800988 | 6.97176072 | 7.81179113 | 0.850580011  | 2.60651191 | 4.17806E-05 | MIM2      |
| YHR138C   | 4.20874054 | 5.92841067 | 4.84205766 | 9.51971136 | 8.92645999 | 8.65107447 | 0.849942308  | 2.83506426 | 2.67062E-06 | YHR138C   |
| YIR017W-A | 2.36741655 | 0.86336078 | 1.08946297 | 2.42427432 | 2.99720554 | 2.259609   | 0.843200725  | 1.07174538 | 0.011448582 | YIR017W-A |
| YOL047C   | 3.94569425 | 2.87786926 | 3.02628604 | 7.09543704 | 4.56096496 | 5.81042315 | 0.833169531  | 2.22365218 | 0.000283143 | LDS2      |
| YLR350W   | 71.417066  | 59.2841067 | 62.4625439 | 111.930519 | 117.477426 | 113.174131 | 0.827448253  | 6.48177238 | 5.90647E-20 | ORM2      |
| YMR194C-A | 0.32880785 | 0.11511477 | 0.3026286  | 0.52125314 | 0.52125314 | 0.25824103 | 0.822993719  | -1.1054341 | 0.20031806  | YMR194C-A |
| YDR431W   | 0.13152314 | 0.17267216 | 0.18157716 | 0.17738593 | 0.52125314 | 0.19368077 | 0.822251909  | -1.5097934 | 0.318092909 | YDR431W   |
| YAL034C-B | 0.13152314 | 0.28778693 | 0.06052572 | 0.23651457 | 0.13031328 | 0.51648206 | 0.822062391  | -1.5102405 | 0.321194771 | YAL034C-B |
| YOR034C-A | 0.32880785 | 0.28778693 | 0.3026286  | 0.41390049 | 0.52125314 | 0.71016283 | 0.81973967   | -0.8690675 | 0.152940128 | YOR034C-A |
| YDR374C   | 0.19728471 | 0.17267216 | 0.12105144 | 0.47302914 | 0.19546993 | 0.19368077 | 0.81350662   | -1.5105256 | 0.316916109 | PHO92     |
| YNL208W   | 166.047966 | 170.542532 | 156.58004  | 315.037405 | 267.59833  | 282.866565 | 0.810737295  | 7.82321692 | 1.91871E-17 | YNL208W   |
| YPL149W   | 22.6877419 | 22.274708  | 23.7260826 | 35.0041561 | 42.612444  | 42.8680108 | 0.809569025  | 4.98245825 | 1.16165E-12 | ATG5      |
| YPL221W   | 295.664023 | 254.806544 | 302.386501 | 469.36316  | 503.530531 | 521.001276 | 0.808766866  | 8.61177972 | 2.38788E-16 | FLC1      |
| YLR156W   | 0.52609257 | 0.51801647 | 0.42368005 | 0.82780099 | 0.91219299 | 0.83928334 | 0.803445979  | -0.3303463 | 0.061011033 | YLR156W   |
| YLR159W   | 0.52609257 | 0.51801647 | 0.42368005 | 0.82780099 | 0.91219299 | 0.83928334 | 0.803445633  | -0.3303463 | 0.060960083 | YLR159W   |
| YLR161W   | 0.52609257 | 0.51801647 | 0.42368005 | 0.82780099 | 0.91219299 | 0.83928334 | 0.803445546  | -0.3303463 | 0.060947245 | YLR161W   |
| YAL053W   | 242.002581 | 187.521961 | 233.145077 | 371.150486 | 387.812335 | 397.110142 | 0.803072424  | 8.24412622 | 4.12021E-14 | FLC2      |
| YCL064C   | 243.120527 | 303.500092 | 247.671249 | 472.85175  | 446.192686 | 460.895677 | 0.796665708  | 8.50177921 | 1.29429E-14 | CHA1      |
| YMR304C-A | 19.3996634 | 15.3102644 | 15.5551102 | 27.6722045 | 28.4734527 | 30.9889235 | 0.795504477  | 4.52263874 | 5.51812E-10 | YMR304C-A |
| YDR182W-A | 0          | 0.05755739 | 0.18157716 | 0.05912864 | 0.13031328 | 0.25824103 | 0.794538138  | -2.0739684 | 0.562891986 | YDR182W-A |
| YDL023C   | 47.808662  | 40.1174974 | 46.9679593 | 76.3350768 | 73.1709093 | 84.1220152 | 0.793189832  | 5.94271207 | 5.05162E-16 | YDL023C   |
| YPR197C   | 9.86423563 | 7.25223053 | 7.62624082 | 12.2396289 | 15.116341  | 15.4299015 | 0.791638445  | 3.50291942 | 6.47679E-06 | YPR197C   |
| YOL106C   | 41.1009818 | 42.592465  | 40.6127587 | 80.8288536 | 69.1311974 | 64.5602573 | 0.787617514  | 5.82244954 | 4.01279E-15 | CMK2      |
| YLR222C-A | 0.39456943 | 0.34534431 | 0.24210288 | 0.41390049 | 0.26062657 | 0.50296412 | 0.78266124   | -0.8156018 | 0.18743012  | YLR222C-A |
| YER106W   | 0.19728471 | 0.28778693 | 0.3026286  | 0.59128642 | 0.58640978 | 0.19368077 | 0.780874696  | -1.043375  | 0.217795998 | MAM1      |
| YOR237W   | 7.62834222 | 5.35283682 | 8.89728096 | 11.6483425 | 12.5100753 | 13.3639733 | 0.779482332  | 3.32101208 | 4.913E-05   | HES1      |
| YER039C-A | 0.39456943 | 0.23022954 | 0.36315432 | 0.59128642 | 0.65156642 | 0.4519218  | 0.778609239  | -0.8157903 | 0.163792419 | YER039C-A |
| YOR049C   | 46.0988612 | 38.9663497 | 42.489056  | 77.3993924 | 74.7346687 | 66.3679445 | 0.777827422  | 5.85233875 | 2.5009E-15  | RSB1      |
| YEL009C-A | 0.19728471 | 0          | 0.24210288 | 0.47302914 | 0.06515664 | 0.19368077 | 0.774427251  | -1.6436566 | 0.393525246 | YEL009C-A |
| YNR059W   | 32.486216  | 31.6565618 | 30.8681178 | 54.339222  | 54.8618928 | 52.6811699 | 0.769005167  | 5.42340833 | 1.42878E-17 | MNT4      |
| YDR077W   | 3279.92411 | 2487.28484 | 3479.07896 | 4455.63882 | 5570.37166 | 5714.87397 | 0.767573851  | 12.0239578 | 1.09862E-08 | SED1      |
| YDL022W   | 332.556264 | 280.822482 | 312.433771 | 525.417113 | 512.652461 | 525.455934 | 0.756166542  | 8.69689076 | 1.53289E-15 | GPD1      |
| YLR108C   | 14.1387377 | 19.4543962 | 13.43671   | 26.1939884 | 26.3232835 | 26.7925068 | 0.751188262  | 4.40422111 | 2.14163E-07 | YLR108C   |
| YPR078C   | 2.56470126 | 1.78427894 | 2.05787451 | 2.77904617 | 3.90939854 | 4.06729621 | 0.747680976  | 1.56640345 | 0.003383489 | YPR078C   |
| YOR273C   | 152.501083 | 122.021657 | 146.895924 | 249.641127 | 228.374031 | 228.607871 | 0.746132496  | 7.55536489 | 2.5417E-13  | TPO4      |

|                |                   |                   |                   |                   |                   |                   |                    |                   |                    |             |
|----------------|-------------------|-------------------|-------------------|-------------------|-------------------|-------------------|--------------------|-------------------|--------------------|-------------|
| Q0055          | 2.0386087         | 1.49649201        | 2.17892595        | 3.13381803        | 3.84424189        | 2.58241029        | 0.744146134        | 1.41018704        | 0.004799125        | AI2         |
| YKR053C        | 28.2117139        | 30.2176272        | 25.7234313        | 44.4056101        | 45.8051195        | 50.4215609        | 0.739880871        | 5.23122992        | 1.19979E-12        | YSR3        |
| YJL088W        | 3.81417111        | 3.91390219        | 4.17627473        | 6.74066519        | 5.99441109        | 7.1016283         | 0.735425099        | 2.43455119        | 7.99668E-05        | ARG3        |
| YMR305C        | 936.707815        | 738.288579        | 910.488418        | 1388.57703        | 1391.94135        | 1523.36383        | 0.735250293        | 10.1652931        | 1.53431E-11        | SCW10       |
| YAL059C-A      | 0.92066199        | 4.02901696        | 0                 | 3.78423309        | 2.67142233        | 1.8076872         | 0.73332189         | 1.2359323         | 0.372545469        | YAL059C-A   |
| YFL062W        | 0.460331          | 0.4029017         | 0.42368005        | 0.41390049        | 0.65156642        | 1.09752437        | 0.729581427        | -0.5303975        | 0.129974731        | COS4        |
| YGL024W        | 0.65761571        | 0.69068862        | 0.3026286         | 1.41908741        | 0.78187971        | 0.51648206        | 0.726707416        | -0.2235109        | 0.123804375        | YGL024W     |
| YAL047W-A      | 0.52609257        | 0.34534431        | 0.42368005        | 0.53215778        | 0.84703635        | 0.77472309        | 0.725918462        | -0.5304247        | 0.120177107        | YAL047W-A   |
| YIL054W        | 0.13152314        | 0.28778693        | 0.06052572        | 0.11825728        | 0.4560965         | 0.25824103        | 0.721088574        | -1.5529869        | 0.414860256        | YIL054W     |
| YCR005C        | 35.8400561        | 35.2826771        | 34.9838666        | 63.267647         | 57.9894116        | 53.455893         | 0.720118065        | 5.55196295        | 6.03872E-14        | CIT2        |
| YPR198W        | 116.989835        | 95.6028167        | 116.26991         | 164.14111         | 179.506549        | 196.134062        | 0.715100229        | 7.17842195        | 3.48876E-12        | SGE1        |
| YER085C        | 0                 | 0                 | 0.48420577        | 0.35477185        | 0.19546993        | 0.25824103        | 0.712574115        | -1.5535109        | 0.426765022        | YER085C     |
| Q0065          | 0.78913885        | 0.86336078        | 1.33156586        | 1.24170148        | 1.6940727         | 2.00136798        | 0.712460879        | 0.52267582        | 0.032776632        | AI4         |
| YCR024C-A      | 0.39456943        | 0                 | 0.12105144        | 0.17738593        | 0.19546993        | 0.4519218         | 0.708152878        | -1.5521392        | 0.418982021        | PMP1        |
| YOR029W        | 0.13152314        | 0                 | 0.06052572        | 0.05912864        | 0.13031328        | 0.12912051        | 0.706873454        | -2.2753232        | 0.732875787        | YOR029W     |
| YGR161C        | 21.2409874        | 22.7351671        | 23.9681854        | 39.970962         | 38.3121057        | 32.4738094        | 0.7046985          | 4.90209182        | 1.11499E-09        | RTS3        |
| YMR230W-A      | 0.06576157        | 0.05755739        | 0.06052572        | 0.23651457        | 0.06515664        | 0                 | 0.704364247        | -2.2760765        | 0.733318311        | YMR230W-A   |
| YFL067W        | 3.48536326        | 3.05054141        | 2.72365744        | 6.3267647         | 4.88674817        | 3.74449492        | 0.696781705        | 2.05684946        | 0.003986642        | YFL067W     |
| <b>YKL163W</b> | <b>12.100129</b>  | <b>10.2452146</b> | <b>11.9840927</b> | <b>18.8029082</b> | <b>18.605829</b>  | <b>17.818631</b>  | <b>0.69671125</b>  | <b>3.91526016</b> | <b>4.32979E-07</b> | <b>PIR3</b> |
| YKL001C        | 9.60118935        | 14.044002         | 10.4709497        | 18.4481363        | 18.6999563        | 18.076872         | 0.691203331        | 3.9082073         | 1.51712E-05        | MET14       |
| YNR064C        | 4.66907153        | 6.38886975        | 5.02363483        | 8.10062396        | 8.34005021        | 9.55491807        | 0.687033574        | 2.83397072        | 0.000178069        | YNR064C     |
| YDL024C        | 2.17013184        | 2.35985279        | 2.78418316        | 3.60684716        | 4.36549503        | 3.80905518        | 0.681890778        | 1.72141549        | 0.002595004        | DIA3        |
| YPL067C        | 31.8943619        | 23.0229541        | 26.0260599        | 50.5549889        | 42.807914         | 36.1537441        | 0.680396703        | 5.13676359        | 1.7916E-06         | YPL067C     |
| YIL176C        | 0.13152314        | 0.17267216        | 0                 | 0.17738593        | 0.26062657        | 0.06456026        | 0.678292615        | -1.953819         | 0.597264951        | PAU14       |
| YJL223C        | 0.13152314        | 0.17267216        | 0                 | 0.17738593        | 0.26062657        | 0.06456026        | 0.678292048        | -1.953819         | 0.597244661        | PAU1        |
| YJL020W-A      | 1.70980084        | 2.12962325        | 1.81577162        | 4.43464815        | 3.3881454         | 1.22664489        | 0.678187223        | 1.37150512        | 0.07147647         | YJL020W-A   |
| YKL202W        | 4.40602525        | 3.91390219        | 3.32891464        | 7.86410939        | 4.75643489        | 5.87498341        | 0.671560732        | 2.36474531        | 0.004191779        | YKL202W     |
| YGL132W        | 1.70980084        | 1.72672155        | 0.66578293        | 3.13381803        | 1.95469927        | 1.42032566        | 0.670673523        | 0.92472825        | 0.076116545        | YGL132W     |
| YER038W-A      | 0.72337728        | 0.4029017         | 0.42368005        | 1.1234442         | 0.78187971        | 0.51648206        | 0.664109642        | -0.3495763        | 0.161142753        | YER038W-A   |
| YEL059W        | 0.06576157        | 0.17267216        | 0.18157716        | 0.47302914        | 0.19546993        | 0                 | 0.658953636        | -1.6915946        | 0.511001776        | HHY1        |
| YER185W        | 3.02503226        | 2.35985279        | 3.02628604        | 4.37551951        | 4.30033839        | 4.51921801        | 0.652324927        | 1.8924719         | 0.002160593        | PUG1        |
| YFL031W        | 763.031507        | 574.883163        | 697.195778        | 1229.46185        | 1018.00738        | 946.13057         | 0.650174779        | 9.76745013        | 2.27914E-07        | HAC1        |
| YKR035W-A      | 4.99787939        | 0                 | 3.93417185        | 9.04668223        | 4.95190481        | 0                 | 0.649863362        | 1.98003528        | 0.461720492        | DID2        |
| YPL111W        | 63.0653465        | 64.7520583        | 64.7019955        | 114.94608         | 98.1259032        | 88.1247512        | 0.646064757        | 6.36473368        | 1.26234E-10        | CAR1        |
| YGL182C        | 0.26304628        | 0.34534431        | 0.18157716        | 0.53215778        | 0.26062657        | 0.4519218         | 0.645194004        | -1.1061346        | 0.336166034        | YGL182C     |
| YJL171C        | 141.518901        | 108.841015        | 133.156586        | 210.202322        | 192.603035        | 194.842856        | 0.640557996        | 7.35421713        | 7.70792E-10        | YJL171C     |
| YOL011W        | 178.674188        | 154.599136        | 183.211357        | 261.525984        | 272.289608        | 268.50611         | 0.63561175         | 7.78064823        | 1.82036E-11        | PLB3        |
| YOR338W        | 29.7899916        | 31.4263323        | 30.989169         | 45.7064403        | 47.8249754        | 49.7113981        | 0.634496027        | 5.29808153        | 1.66763E-11        | YOR338W     |
| YDR079C-A      | 0.59185414        | 0.34534431        | 0.36315432        | 0.7095437         | 0.4560965         | 0.83928334        | 0.634422916        | -0.5747058        | 0.221429619        | TFB5        |
| YGL156W        | 35.5770098        | 30.7932011        | 35.1654438        | 52.6244914        | 50.8873376        | 53.8432546        | 0.633074233        | 5.43450297        | 4.07695E-11        | AMS1        |
| YNR019W        | 142.439562        | 121.100738        | 148.166965        | 199.795681        | 213.25769         | 225.121617        | 0.632465892        | 7.45175149        | 1.97833E-10        | ARE2        |
| <b>YMR104C</b> | <b>41.4297896</b> | <b>32.6292548</b> | <b>32.2602092</b> | <b>52.4471055</b> | <b>58.3803515</b> | <b>53.9078148</b> | <b>0.632144637</b> | <b>5.50044966</b> | <b>1.06176E-08</b> | <b>YPK2</b> |
| YLR415C        | 0.19728471        | 0.28778693        | 0.48420577        | 0.05912864        | 0.65156642        | 0.83928334        | 0.631038353        | -0.896057         | 0.302964317        | YLR415C     |
| YML101C-A      | 3.35384011        | 2.35985279        | 3.51049181        | 7.39108025        | 4.36549503        | 2.45328978        | 0.628076741        | 2.01490149        | 0.074862589        | YML101C-A   |
| YNL036W        | 18.8735708        | 28.0304466        | 21.8497852        | 35.0041561        | 36.0967798        | 35.2499005        | 0.626579787        | 4.87328176        | 2.81618E-06        | NCE103      |
| YDR072C        | 273.831181        | 221.250588        | 282.715642        | 347.321643        | 395.240192        | 457.280302        | 0.625410017        | 8.3649174         | 2.56292E-07        | IPT1        |
| YFL030W        | 17.3610547        | 17.036986         | 19.3682307        | 30.3329934        | 27.8870429        | 24.597458         | 0.623860189        | 4.51609633        | 6.40406E-07        | AGX1        |
| YGL006W        | 158.156578        | 154.771809        | 158.577388        | 235.036352        | 239.711287        | 251.333082        | 0.622816985        | 7.6416544         | 7.14339E-13        | PMC1        |
| YPL119C-A      | 0.72337728        | 0.69068862        | 1.02893725        | 1.41908741        | 1.2379762         | 1.09752437        | 0.618654781        | 0.20975399        | 0.073194963        | YPL119C-A   |
| <b>YLR054C</b> | <b>3.41960169</b> | <b>3.22321357</b> | <b>2.42102883</b> | <b>4.13900494</b> | <b>4.1700251</b>  | <b>5.61674238</b> | <b>0.618446953</b> | <b>1.97860652</b> | <b>0.007384777</b> | <b>OSW2</b> |
| YGL217C        | 1.38099299        | 0.86336078        | 1.08946297        | 1.65560198        | 1.75922934        | 1.67856669        | 0.618109276        | 0.60363729        | 0.055318018        | YGL217C     |
| <b>YDR055W</b> | <b>284.879125</b> | <b>221.077916</b> | <b>247.852827</b> | <b>361.985546</b> | <b>379.602598</b> | <b>413.379327</b> | <b>0.615760576</b> | <b>8.31381997</b> | <b>9.40294E-09</b> | <b>PST1</b> |
| YIR013C        | 0.460331          | 0.34534431        | 0.66578293        | 0.82780099        | 0.71672306        | 0.71016283        | 0.615247805        | -0.4274928        | 0.206054179        | GAT4        |
| YEL014C        | 0.19728471        | 0.4029017         | 0.36315432        | 0.59128642        | 0.4560965         | 0.4519218         | 0.614638111        | -0.8976993        | 0.312002115        | YEL014C     |
| YHL048W        | 74.3105751        | 53.5859256        | 61.6757095        | 100.400434        | 94.9983844        | 94.1288551        | 0.612244999        | 6.32081268        | 1.72229E-08        | COS8        |
| YOR376W        | 0.06576157        | 0.11511477        | 0.3026286         | 0                 | 0.39093985        | 0.38736154        | 0.611455073        | -1.5970154        | 0.535525769        | YOR376W     |
| YDR111C        | 49.9130323        | 48.7511052        | 54.3520973        | 77.7541642        | 81.2503329        | 74.7607779        | 0.611294495        | 6.0127164         | 3.00722E-12        | ALT2        |
| YML131W        | 22.9507882        | 23.4834131        | 24.3313398        | 36.4232435        | 37.0741294        | 34.2169363        | 0.605722258        | 4.89995015        | 3.49135E-09        | YML131W     |
| YGR236C        | 0.26304628        | 0.34534431        | 0.24210288        | 0.76867235        | 0.26062657        | 0.25824103        | 0.605231795        | -1.0439884        | 0.362614986        | SPG1        |
| YAL064W-B      | 0.65761571        | 0.69068862        | 0.42368005        | 0.82780099        | 1.36828949        | 0.51648206        | 0.604235821        | -0.2047358        | 0.172257951        | YAL064W-B   |
| YHR199C-A      | 0.52609257        | 0.63313124        | 0.60525721        | 0.88692963        | 0.84703635        | 0.96840386        | 0.603319856        | -0.2051978        | 0.116382686        | NBL1        |
| YPR150W        | 0.92066199        | 0.4029017         | 0.72630865        | 0.82780099        | 0.91219299        | 1.3557654         | 0.601660065        | -0.0412892        | 0.140270548        | YPR150W     |
| YGL167C        | 221.682255        | 196.731142        | 234.900322        | 322.428485        | 327.346971        | 341.33008         | 0.601345588        | 8.09889156        | 2.86294E-10        | PMR1        |
| YPL096C-A      | 0.78913885        | 0.4029017         | 0.96841153        | 1.18257284        | 0.97734963        | 1.09752437        | 0.601063405        | 0.03246538        | 0.12437313         | ERI1        |
| YPL156C        | 15.9800617        | 19.5119536        | 18.4603448        | 27.0217894        | 26.3232835        | 28.600194         | 0.600693287        | 4.50886762        | 6.56914E-07        | PRM4        |
| YOR345C        | 0.78913885        | 0.34534431        | 0.3026286         | 0.17738593        | 0.39093985        | 1.61400643        | 0.598790041        | -0.4866835        | 0.365636618        | YOR345C     |
| YMR011W        | 463.092982        | 394.498318        | 514.226524        | 693.415051        | 693.462144        | 786.989536        | 0.596222384        | 9.1658016         | 1.35749E-06        | HXT2        |
| YBR004C        | 57.7386592        | 49.3842365        | 56.2889203        | 59.3578971        | 65.609846         | 91.6110051        | 0.59386934         | 6.09633251        | 8.17866E-08        | GPH18       |
| YKL065W-A      | 0.13152314        | 0.17267216        | 0.06052572        | 0.29564321        | 0.13031328        | 0.12912051        | 0.592510605        | -1.8431025        | 0.623707282        | YKL065W-A   |
| YDR040C        | 356.624999        | 276.563236        | 341.849271        | 458.542619        | 480.595393        | 530.104272        | 0.591653923        | 8.67051009        | 8.70838E-08        | ENA1        |
| <b>YKL096W</b> | <b>382.929627</b> | <b>293.945566</b> | <b>345.480814</b> | <b>550.428528</b> | <b>507.83087</b>  | <b>478.714308</b> | <b>0.588401261</b> | <b>8.73691122</b> | <b>8.05785E-08</b> | <b>CWP1</b> |
| YJR078W        | 5.52397195        | 5.06504989        | 6.1130978         | 7.7458521         | 7.88395371        | 9.42579756        | 0.58426206         | 2.82115143        | 0.000978209        | BNA2        |
| YHR087W        | 8.68052735        | 7.82780438        | 5.93152064        | 14.4273887        | 10.9463159        | 8.19915267        | 0.583888167        | 3.2423403         | 0.009785498        | RTC3        |



|                |                   |                   |                   |                   |                   |                   |                    |                   |                    |               |
|----------------|-------------------|-------------------|-------------------|-------------------|-------------------|-------------------|--------------------|-------------------|--------------------|---------------|
| YDR413C        | 1.97284713        | 0                 | 3.69206897        | 2.12863111        | 4.03971182        | 2.32416926        | 0.583512667        | 1.29632709        | 0.444362592        | YDR413C       |
| YDR112W        | 1.97284713        | 2.01450848        | 1.93682307        | 2.60166025        | 3.45330204        | 2.84065132        | 0.581005118        | 1.36984181        | 0.01846804         | IRC2          |
| YIL100C-A      | 0.26304628        | 0                 | 0                 | 0                 | 0.13031328        | 0.25824103        | 0.578171911        | -2.1373164        | 0.76305467         | YIL100C-A     |
| YFL064C        | 1.24946985        | 0.28778693        | 0.72630865        | 1.24170148        | 0.91219299        | 1.16208463        | 0.576568908        | 0.06232757        | 0.183094565        | YFL064C       |
| YLR122C        | 0.78913885        | 0.97847555        | 0.90788581        | 1.53734469        | 1.36828949        | 1.09752437        | 0.576334788        | 0.30887921        | 0.085530301        | YLR122C       |
| YLR465C        | 1.05218513        | 1.32381986        | 0.72630865        | 1.47821605        | 1.36828949        | 1.8076872         | 0.576329414        | 0.50064535        | 0.078650366        | BSC3          |
| YKR076W        | 13.481122         | 11.6265918        | 12.6498756        | 19.985481         | 18.2438598        | 17.9477515        | 0.57538712         | 3.97868838        | 1.97209E-05        | ECM4          |
| YJL026C-A      | 5.39244881        | 5.58306636        | 5.08416055        | 9.93361186        | 7.5581705         | 6.39146547        | 0.574656289        | 2.76299408        | 0.004809536        | YJL026C-A     |
| YOR314W        | 0.52609257        | 0.74824601        | 0.60525721        | 1.00518691        | 0.52125314        | 1.29120515        | 0.573324054        | -0.1385628        | 0.172127082        | YOR314W       |
| YHR137C-A      | 11.639798         | 2.64763972        | 0.66578293        | 10.7022842        | 9.12192992        | 2.32416926        | 0.568662077        | 2.64659174        | 0.435004977        | YHR137C-A     |
| YPL222W        | 30.0530379        | 28.3182335        | 30.4444376        | 44.2873529        | 44.6974566        | 42.6097698        | 0.567660677        | 5.20319704        | 2.54801E-09        | FMP40         |
| YER144C        | 73.3899131        | 65.7880912        | 72.2677106        | 96.3796865        | 110.049569        | 106.911786        | 0.567504519        | 6.4520776         | 1.86428E-10        | UBP5          |
| YMR294W-A      | 21.9643647        | 26.6490693        | 20.3366422        | 38.31536          | 32.9041043        | 30.6015619        | 0.561947705        | 4.83760952        | 1.82331E-05        | YMR294W-A     |
| YML122W-A      | 156.512539        | 122.712345        | 124.743511        | 178.09547         | 211.302991        | 206.334582        | 0.560679695        | 7.38101402        | 3.99836E-07        | YML122W-A     |
| YDR391C        | 15.3882076        | 18.6485928        | 13.6788129        | 25.9574738        | 24.4988975        | 19.8845592        | 0.559184814        | 4.30770783        | 0.000245999        | YDR391C       |
| YHL037C        | 0.13152314        | 0.11511477        | 0.3026286         | 0.17738593        | 0.39093985        | 0.25824103        | 0.553981337        | -1.5098462        | 0.548853553        | YHL037C       |
| <b>YNL192W</b> | <b>261.796814</b> | <b>245.021789</b> | <b>272.668372</b> | <b>373.633889</b> | <b>383.83778</b>  | <b>384.779133</b> | <b>0.551312572</b> | <b>8.32367574</b> | <b>6.92783E-10</b> | <b>CHS1</b>   |
| YCR037C        | 127.972017        | 117.99264         | 128.677682        | 177.681569        | 175.531994        | 195.230218        | 0.549942236        | 7.26626874        | 3.16231E-10        | PHO87         |
| YOR282W        | 0.39456943        | 0.28778693        | 0.3026286         | 0.7095437         | 0.4560965         | 0.25824103        | 0.546865664        | -0.9254818        | 0.385238012        | YOR282W       |
| YBR287W        | 181.633459        | 142.6272          | 165.235218        | 231.19299         | 237.105221        | 244.683375        | 0.542891349        | 7.64744618        | 7.92425E-08        | YBR287W       |
| YPR195C        | 1.44675456        | 1.1511477         | 1.02893725        | 1.89211654        | 1.36828949        | 2.00136798        | 0.542781836        | 0.67919011        | 0.078055898        | YPR195C       |
| YHR028W-A      | 0.13152314        | 0.34534431        | 0.36315432        | 0.59128642        | 0.19546993        | 0.4519218         | 0.542210554        | -1.0749285        | 0.436108181        | YHR028W-A     |
| YNL339C        | 62.8680617        | 84.8395857        | 111.972583        | 120.149401        | 117.477426        | 139.966638        | 0.539573842        | 6.73247333        | 0.000514224        | YRF1-6        |
| YOR152C        | 24.5290659        | 18.8212649        | 21.668208         | 30.1556074        | 29.5159589        | 34.6688582        | 0.538617611        | 4.73609861        | 2.11938E-05        | YOR152C       |
| <b>YPR159W</b> | <b>628.746379</b> | <b>473.69728</b>  | <b>560.710277</b> | <b>778.0738</b>   | <b>799.406844</b> | <b>835.216048</b> | <b>0.536820501</b> | <b>9.4080948</b>  | <b>9.94142E-07</b> | <b>KRE6</b>   |
| YPL171C        | 2.10437027        | 2.07206587        | 2.11840023        | 3.84336173        | 2.34563912        | 2.26321158        | 0.535280003        | 1.42939727        | 0.038389359        | OYE3          |
| YNR075W        | 24.1344965        | 20.5479865        | 23.3629282        | 28.5000054        | 35.2497435        | 34.8625389        | 0.535199135        | 4.80021732        | 1.33273E-05        | COS10         |
| YIL055C        | 21.1094642        | 19.5119536        | 20.2761165        | 26.6670175        | 31.7964414        | 29.3749171        | 0.528099479        | 4.63715934        | 5.85338E-06        | YIL055C       |
| <b>YMR238W</b> | <b>127.511686</b> | <b>120.755394</b> | <b>120.748813</b> | <b>174.547751</b> | <b>173.642452</b> | <b>183.351131</b> | <b>0.526624457</b> | <b>7.23067302</b> | <b>2.07821E-10</b> | <b>DFG5</b>   |
| YPR002W        | 4.53754839        | 5.52550897        | 5.02363483        | 6.68153655        | 7.5581705         | 7.5535501         | 0.525324013        | 2.64688042        | 0.00300519         | PDH1          |
| <b>YJL159W</b> | <b>1926.41946</b> | <b>1627.14728</b> | <b>2020.95382</b> | <b>2503.21106</b> | <b>2698.85328</b> | <b>2820.25028</b> | <b>0.525179077</b> | <b>11.1460755</b> | <b>7.85934E-07</b> | <b>HSP150</b> |
| YEL059C-A      | 0.85490042        | 0.92091816        | 0.48420577        | 1.41908741        | 0.78187971        | 1.03296412        | 0.521935088        | 0.05996295        | 0.181972587        | SOM1          |
| YMR206W        | 3.02503226        | 2.12962325        | 2.84470888        | 4.02074766        | 3.51845868        | 3.87361544        | 0.51867559         | 1.74399588        | 0.025677587        | YMR206W       |
| YNL289W        | 71.3513044        | 77.3571256        | 67.0019729        | 109.565374        | 103.599061        | 95.6783013        | 0.517713061        | 6.45194119        | 1.11034E-08        | PCL1          |
| YGR176W        | 4.20874054        | 4.89237774        | 4.17627473        | 7.45020889        | 5.47315795        | 6.06866418        | 0.516648098        | 2.46177136        | 0.009638987        | YGR176W       |
| <b>YIR039C</b> | <b>9.66695092</b> | <b>8.57605039</b> | <b>9.92621821</b> | <b>12.5944007</b> | <b>14.5950879</b> | <b>13.041172</b>  | <b>0.514153422</b> | <b>3.52391898</b> | <b>0.00073816</b>  | <b>YPS6</b>   |
| YJL225C        | 245.948275        | 209.451325        | 253.844873        | 334.076827        | 354.90823         | 321.962003        | 0.511479774        | 8.16386677        | 2.66407E-07        | YJL225C       |
| YLR142W        | 9.79847406        | 8.97895208        | 9.68411533        | 13.3630731        | 13.4874249        | 13.6867745        | 0.510804443        | 3.53708433        | 0.000373312        | POT1          |
| YPR154W        | 62.670777         | 51.859204         | 64.7019955        | 79.114123         | 84.1823818        | 91.9983666        | 0.51068152         | 6.18010154        | 4.9137E-07         | PIN3          |
| YIL068W-A      | 1.64403927        | 2.93542664        | 2.42102883        | 3.37033259        | 3.19267547        | 3.48625389        | 0.510519732        | 1.57115397        | 0.038973504        | YIL068W-A     |
| YDR085C        | 15.2566844        | 16.7491991        | 16.3419446        | 23.5923282        | 22.0229451        | 23.2416926        | 0.509253691        | 4.29665945        | 2.43084E-05        | AFR1          |
| YGR268C        | 27.3568135        | 21.8718064        | 24.5734426        | 32.7572677        | 36.0967798        | 36.0891838        | 0.50901742         | 4.9011253         | 8.89197E-06        | HUA1          |
| YLR247C        | 87.4628893        | 89.2715044        | 84.6149577        | 124.584049        | 130.182971        | 116.466704        | 0.506257404        | 6.72162263        | 1.39942E-09        | IRC20         |
| YFL059W        | 5.32668724        | 5.46795159        | 4.17627473        | 9.22406815        | 5.66862788        | 6.32690521        | 0.506201398        | 2.6243702         | 0.026163106        | SNZ3          |
| YNL134C        | 151.185851        | 140.152233        | 128.314528        | 197.371407        | 193.124288        | 204.204094        | 0.503174813        | 7.40222763        | 3.76615E-08        | YNL134C       |
| YAR047C        | 0.26304628        | 0.28778693        | 0.54473149        | 0.7095437         | 0.52125314        | 0.32280129        | 0.502513497        | -0.816742         | 0.412088225        | YAR047C       |
| YHR209W        | 13.5468836        | 13.8713298        | 12.2261956        | 16.9699203        | 20.0030892        | 19.2389567        | 0.502332351        | 4.00708274        | 0.000244992        | CRG1          |
| YOR139C        | 2.76198598        | 2.59008233        | 2.48155455        | 4.43464815        | 3.45330204        | 3.16345261        | 0.500944771        | 1.71043971        | 0.033719467        | YOR139C       |
| <b>YOR208W</b> | <b>53.8587265</b> | <b>54.9673028</b> | <b>51.9915942</b> | <b>63.8589334</b> | <b>79.0350071</b> | <b>84.6384973</b> | <b>0.499817605</b> | <b>6.01823332</b> | <b>2.34903E-06</b> | <b>PTP2</b>   |
| YDR290W        | 0                 | 0.11511477        | 0.18157716        | 0.05912864        | 0.26062657        | 0.12912051        | 0.49906879         | -2.012671         | 0.782553384        | YDR290W       |
| YAL018C        | 0.13152314        | 0.05755739        | 0.12105144        | 0.05912864        | 0.39093985        | 0                 | 0.495969877        | -2.0122416        | 0.78404202         | LDS1          |
| YFL019C        | 0.06576157        | 0.17267216        | 0.06052572        | 0.17738593        | 0.13031328        | 0.12912051        | 0.4952155          | -2.0129744        | 0.781939487        | YFL019C       |
| YER130C        | 41.4297896        | 54.2766142        | 46.5442793        | 69.2987684        | 67.2416548        | 63.9146547        | 0.493573517        | 5.83912331        | 1.96985E-06        | COM2          |
| YOR134W        | 5.91854138        | 5.23772205        | 6.17362352        | 7.21369433        | 9.77349634        | 7.42442959        | 0.493188717        | 2.81975584        | 0.009048505        | BAG7          |
| YMR102C        | 91.0140141        | 84.6669135        | 86.2491521        | 128.42741         | 123.080897        | 115.36918         | 0.486622839        | 6.71300513        | 7.50793E-09        | YMR102C       |
| YLL059C        | 0.92066199        | 0.51801647        | 0.78683437        | 0.65041506        | 1.56375941        | 0.9038436         | 0.48261558         | 0.00434046        | 0.25755236         | YLL059C       |
| YBR226C        | 3.87993268        | 5.12260728        | 5.68941775        | 7.45020889        | 6.64597751        | 6.45602573        | 0.480912645        | 2.58604667        | 0.013915391        | YBR226C       |
| YMR174C        | 0.19728471        | 0.11511477        | 0.18157716        | 0.17738593        | 0.32578321        | 0.19368077        | 0.480524083        | -1.6430973        | 0.664675099        | PAI3          |
| YMR040W        | 1.64403927        | 2.35985279        | 2.17892595        | 2.42427432        | 2.86689226        | 3.35713338        | 0.472382809        | 1.37443536        | 0.067345668        | YET2          |
| YDL123W        | 22.8192651        | 19.2241666        | 27.2971001        | 32.698139         | 33.0995743        | 30.0205196        | 0.467323001        | 4.78832299        | 0.000386767        | SNA4          |
| YNR076W        | 3.87993268        | 2.93542664        | 3.75259469        | 6.03112149        | 4.75643489        | 3.74449492        | 0.465855982        | 2.10644315        | 0.046150207        | PAU6          |
| YLL064C        | 3.87993268        | 2.93542664        | 3.75259469        | 6.03112149        | 4.75643489        | 3.74449492        | 0.465854099        | 2.10644315        | 0.046178687        | PAU18         |
| YMR140W        | 42.6134979        | 46.9668263        | 44.2443019        | 63.4450329        | 58.836448         | 62.4297688        | 0.464417413        | 5.73358723        | 1.88854E-07        | SIP5          |
| YGL074C        | 2.0386087         | 1.95695109        | 1.21051442        | 2.2468884         | 2.34563912        | 2.58241029        | 0.462006515        | 1.12464545        | 0.093062376        | YGL074C       |
| YPL233W        | 14.2044993        | 13.6986577        | 14.2235444        | 20.6950247        | 20.589499         | 16.6565464        | 0.460621586        | 4.06992676        | 0.000905661        | NSL1          |
| YOL126C        | 29.8557532        | 26.7641841        | 28.3260373        | 37.8423309        | 39.5500819        | 39.3817569        | 0.459720404        | 5.07556317        | 4.50357E-06        | MDH2          |
| YFL013W-A      | 6.97072651        | 10.3027719        | 7.44466366        | 14.2500027        | 10.555376         | 9.16755653        | 0.45769176         | 3.31197334        | 0.031794837        | YFL013W-A     |
| YML101C        | 19.2681403        | 15.2527071        | 17.3708819        | 28.4408768        | 23.5215479        | 19.1098361        | 0.456363744        | 4.36547914        | 0.003758408        | CUE4          |
| YLR332W        | 89.1069285        | 75.5728467        | 95.1464331        | 97.9170312        | 121.126198        | 136.738625        | 0.453314779        | 6.68200216        | 0.000177989        | MID2          |
| YIL032C        | 0.85490042        | 0.34534431        | 0.36315432        | 1.24170148        | 0.52125314        | 0.32280129        | 0.450988293        | -0.4481214        | 0.419388217        | YIL032C       |
| YBR071W        | 52.6092567        | 51.0534006        | 49.0258338        | 60.5477294        | 72.1935596        | 75.8583023        | 0.449578974        | 5.91422533        | 6.31282E-06        | YBR071W       |
| YBL095W        | 31.3025077        | 28.4909056        | 31.4128491        | 48.5446151        | 38.9636721        | 36.6702261        | 0.446769857        | 5.17082274        | 0.000184892        | YBL095W       |
| YOL015W        | 7.16801122        | 5.98596805        | 7.68676654        | 9.16493951        | 10.0992796        | 9.10299627        | 0.44575484         | 3.05466297        | 0.008217075        | IRC10         |

|           |            |            |            |             |            |            |             |            |             |           |
|-----------|------------|------------|------------|-------------|------------|------------|-------------|------------|-------------|-----------|
| YPL134C   | 28.9350912 | 28.1455613 | 26.0260599 | 40.9170203  | 36.7483462 | 35.379021  | 0.444900532 | 5.03604069 | 3.05248E-05 | ODC1      |
| YPL061W   | 1348.1122  | 1303.84745 | 1276.3664  | 1967.20992  | 1764.63734 | 1614.65203 | 0.444707588 | 10.5942523 | 8.86701E-06 | ALD6      |
| YOL155C   | 198.86299  | 161.045564 | 189.627083 | 235.627638  | 254.501845 | 256.949824 | 0.443243315 | 7.75615384 | 9.26395E-06 | HPF1      |
| YJL158C   | 1505.67693 | 1206.51791 | 1524.82448 | 1908.79082  | 1889.34716 | 1958.37084 | 0.44217419  | 10.7018966 | 3.39743E-05 | CIS3      |
| YFL015C   | 0.19728471 | 0.28778693 | 0.24210288 | 0.47302914  | 0.19546993 | 0.32280129 | 0.44159187  | -1.2762435 | 0.599125078 | YFL015C   |
| YHR032W-A | 0.06576157 | 0.23022954 | 0.06052572 | 0           | 0.39093985 | 0.12912051 | 0.441362707 | -1.8970027 | 0.801666617 | YHR032W-A |
| YLR100W   | 157.498962 | 180.49996  | 174.374602 | 227.586143  | 236.518611 | 231.642203 | 0.441036818 | 7.6544148  | 1.12989E-06 | ERG27     |
| YLR056W   | 770.26528  | 568.78208  | 726.30865  | 862.509501  | 917.405523 | 1023.47376 | 0.440833612 | 9.66451002 | 0.000240749 | ERG3      |
| YGR177C   | 61.2240225 | 54.9673028 | 54.1705201 | 76.6898487  | 77.4712477 | 76.9558267 | 0.440708503 | 6.06639049 | 3.36875E-07 | ATF2      |
| YLR438C-A | 4.99787939 | 4.77726297 | 4.53942906 | 8.98755359  | 5.27768802 | 5.10026032 | 0.440149441 | 2.52387638 | 0.071329432 | LSM3      |
| YGR087C   | 1.77556241 | 1.66916417 | 1.93682307 | 2.12863111  | 3.19267547 | 2.00136798 | 0.439907865 | 1.15878826 | 0.116712223 | PDC6      |
| YDR046C   | 275.935551 | 215.782637 | 262.318474 | 340.04882   | 346.56818  | 335.971579 | 0.4397368   | 8.2104066  | 1.96586E-05 | BAP3      |
| YMR251W   | 3.74840954 | 2.18718064 | 4.3578519  | 4.19813358  | 4.86674817 | 4.84201929 | 0.438708192 | 2.04993192 | 0.086712942 | GTO3      |
| YCL049C   | 33.0123086 | 25.6705938 | 31.8970549 | 43.6960664  | 39.0939854 | 39.7691185 | 0.43817376  | 5.15495154 | 0.000138679 | YCL049C   |
| YMR141C   | 4.7348331  | 4.20168912 | 4.72100622 | 5.85373556  | 6.18988101 | 6.45602573 | 0.438006026 | 2.45178692 | 0.016559665 | YMR141C   |
| YGR287C   | 10.9164208 | 10.763231  | 9.86569249 | 16.7925343  | 12.6403886 | 13.2348527 | 0.437748715 | 3.64352124 | 0.006549358 | IMA1      |
| YPR170C   | 0.65761571 | 0.11511477 | 0.36315432 | 0.59128642  | 0.4560965  | 0.4519218  | 0.436751393 | -0.841847  | 0.492959486 | YPR170C   |
| YDL234C   | 49.189655  | 53.4132534 | 48.9653081 | 69.4761544  | 70.8252701 | 64.8184983 | 0.436014229 | 5.89637322 | 6.85207E-07 | GPY7      |
| YCL026C-B | 7.10224965 | 8.1155913  | 7.80781798 | 9.87448322  | 10.3599061 | 10.9752437 | 0.435715322 | 3.19476647 | 0.005205739 | HBN1      |
| YBR085C-A | 7.10224965 | 8.00047653 | 7.02098361 | 9.34232544  | 11.0766292 | 9.9035782  | 0.432014565 | 3.13533645 | 0.007722144 | YBR085C-A |
| YHL049C   | 11.7713212 | 10.7056736 | 11.4393612 | 14.8412891  | 17.4619801 | 13.4285335 | 0.431432208 | 3.74211133 | 0.004280119 | YHL049C   |
| YDR059C   | 18.8735708 | 13.8713298 | 17.1893047 | 22.7645272  | 20.5243423 | 23.8872952 | 0.430293614 | 4.29411536 | 0.002474207 | UBC5      |
| Q0050     | 1.18370828 | 1.66916417 | 2.29997739 | 2.2468884   | 2.41079576 | 2.32416926 | 0.428765551 | 1.10260529 | 0.13106651  | AI1       |
| YLR101C   | 26.8964825 | 29.1240369 | 28.5076145 | 42.0995931  | 34.9891169 | 36.6056659 | 0.427901581 | 5.0516294  | 8.71926E-05 | YLR101C   |
| YBR036C   | 278.237206 | 215.091948 | 254.87381  | 348.681602  | 338.293287 | 318.79855  | 0.427076478 | 8.19192445 | 4.86971E-05 | CSG2      |
| YPR200C   | 1.31523142 | 1.78427894 | 1.08946297 | 1.77385926  | 2.08501255 | 1.8076872  | 0.425956596 | 0.82026152 | 0.163974936 | ARR2      |
| YLR235C   | 1.38099299 | 2.01450848 | 2.05787451 | 2.06950247  | 2.60626569 | 2.71153081 | 0.424990233 | 1.17751069 | 0.110756093 | YLR235C   |
| YHR096C   | 13.020791  | 11.9719361 | 11.3183098 | 14.4273887  | 17.9180766 | 16.3983053 | 0.424268363 | 3.8353564  | 0.003671868 | HXT5      |
| YCR024C-B | 23.8056887 | 17.8427894 | 16.1603675 | 26.8444035  | 25.1504639 | 25.4367414 | 0.424148014 | 4.50063534 | 0.003354449 | YCR024C-B |
| YIL012W   | 0.460331   | 0.23022954 | 0.48420577 | 0.65041506  | 0.58640978 | 0.32280129 | 0.423686449 | -0.7900863 | 0.498267463 | YIL012W   |
| YOR348C   | 4.99787939 | 5.12260728 | 6.4157264  | 7.0363084   | 7.62332714 | 7.5535501  | 0.423459216 | 2.7167767  | 0.018575498 | POT4      |
| YLR284C   | 5.72125667 | 7.54001745 | 6.83940645 | 9.87448322  | 9.05677327 | 9.07003216 | 0.423214543 | 2.99691716 | 0.016084223 | ECI1      |
| YDL124W   | 121.461621 | 137.044134 | 121.35407  | 176.144225  | 164.976618 | 167.662988 | 0.421368724 | 7.21168989 | 1.5E-06     | YDL124W   |
| YJR019C   | 44.1917756 | 33.5559555 | 42.8522103 | 50.7323748  | 55.5134592 | 55.1344597 | 0.421166274 | 5.55719525 | 0.000152749 | TES1      |
| YPL054W   | 3.74840954 | 4.71970558 | 4.90258338 | 5.2033205   | 6.05956773 | 6.71426676 | 0.42069078  | 2.4175005  | 0.036508392 | LEE1      |
| YGR051C   | 0.59185414 | 0.92091816 | 0.48420577 | 0.94605827  | 0.78187971 | 0.96840386 | 0.420355735 | -0.1386981 | 0.31601476  | YGR051C   |
| YDL177W   | 0.19728471 | 0.69068862 | 0.3026286  | 0.53215778  | 0.71672306 | 0.38736154 | 0.419964639 | -0.7403957 | 0.43001138  | YDL177W   |
| YDR216W   | 75.4942834 | 64.406714  | 70.9966705 | 92.71137107 | 97.8652767 | 91.4173243 | 0.419767789 | 6.36187843 | 1.86908E-06 | ADR1      |
| YKR013W   | 367.278373 | 330.149161 | 381.130464 | 452.925398  | 492.193276 | 494.725251 | 0.416824278 | 8.71365678 | 1.14878E-05 | PRY2      |
| YJL172W   | 281.656808 | 237.309099 | 272.789424 | 344.897369  | 350.216952 | 361.731121 | 0.416785792 | 8.26770003 | 1.18671E-05 | CPS1      |
| YBR076W   | 4.7348331  | 3.05054141 | 3.81312041 | 5.67634963  | 4.49580832 | 5.22938084 | 0.416746979 | 2.2054333  | 0.062068602 | ECM8      |
| YJR115W   | 4.27450211 | 4.31680389 | 6.1130978  | 6.09025013  | 7.75364043 | 5.81042315 | 0.415990705 | 2.54622862 | 0.049578642 | YJR115W   |
| YLR125W   | 2.0386087  | 2.30229541 | 2.48155455 | 4.0798763   | 3.12751883 | 1.87224746 | 0.414578405 | 1.47729863 | 0.153837586 | YLR125W   |
| YDL016C   | 1.1179467  | 0.92091816 | 1.02893725 | 1.59647333  | 1.17281956 | 1.29120515 | 0.411897886 | 0.39110291 | 0.207098372 | YDL016C   |
| YPL028W   | 649.527035 | 535.398797 | 597.933596 | 849.323814  | 765.069293 | 754.709407 | 0.410262549 | 9.43483429 | 5.761E-05   | ERG10     |
| YPR145C-A | 0          | 0.11511477 | 0.06052572 | 0.17738593  | 0          | 0.06456026 | 0.410258289 | -2.3502588 | 1           | YPR145C-A |
| YDR525W   | 0.13152314 | 0.05755739 | 0          | 0.05912864  | 0.13031328 | 0.06456026 | 0.40996199  | -2.3495004 | 1           | API2      |
| YDL110C   | 17.6898626 | 19.1666093 | 14.526173  | 27.3174326  | 20.7849689 | 20.07824   | 0.409046998 | 4.32644075 | 0.008973186 | TMA17     |
| YDR521W   | 1.84132398 | 2.35985279 | 2.23945167 | 3.37033259  | 2.86689226 | 2.32416926 | 0.408636938 | 1.39547039 | 0.113281359 | YDR521W   |
| YPR182W   | 2.69622441 | 2.87786926 | 2.96576032 | 4.19813358  | 3.51845868 | 3.61537441 | 0.408413337 | 1.78139633 | 0.06492586  | SMX3      |
| YGR256W   | 8.48324264 | 7.48246007 | 6.23414924 | 10.4657696  | 10.2295928 | 8.71563473 | 0.408304979 | 3.12356889 | 0.020764392 | GND2      |
| YMR145C   | 468.156623 | 378.554922 | 445.650882 | 618.781239  | 541.842637 | 552.571242 | 0.406839331 | 8.96876005 | 0.000103699 | NDE1      |
| YOL002C   | 114.68818  | 101.531227 | 124.017202 | 147.939862  | 148.882928 | 154.169894 | 0.406757442 | 7.0441017  | 8.81226E-06 | IZH2      |
| YMR030W-A | 0.26304628 | 0.17267216 | 0.18157716 | 0.23651457  | 0.32578321 | 0.25824103 | 0.404871013 | -1.4680397 | 0.695081682 | YMR030W-A |
| YKL118W   | 0.26304628 | 0.34534431 | 0          | 0.35477185  | 0.26062657 | 0.19368077 | 0.404324404 | -1.4686614 | 0.698630084 | YKL118W   |
| YOR343C   | 0.52609257 | 0.57557385 | 0.60525721 | 0.47302914  | 0.71818791 | 1.03296412 | 0.403189843 | -0.3489297 | 0.386813374 | YOR343C   |
| YGL051W   | 10.8506592 | 8.1155913  | 8.23149803 | 11.6483425  | 10.0341229 | 14.2032566 | 0.402298759 | 3.40800782 | 0.032853734 | MST27     |
| YDR402C   | 5.72125667 | 5.12260728 | 5.08416055 | 6.26763605  | 7.75364043 | 7.03706804 | 0.402129015 | 2.64869055 | 0.024683293 | DIT2      |
| YLL037W   | 2.82774755 | 4.14413173 | 3.38944036 | 4.73029136  | 4.49580832 | 4.51921801 | 0.401306022 | 2.05226713 | 0.054322088 | YLL037W   |
| YDR435C   | 30.9079383 | 34.4768737 | 33.1075693 | 46.2385981  | 41.8305643 | 41.9641672 | 0.400426341 | 5.25602435 | 5.32499E-05 | PPM1      |
| YOR153W   | 4409.51061 | 3688.50747 | 4482.77698 | 5392.05912  | 5726.48698 | 5462.76617 | 0.398342239 | 12.2468725 | 9.76493E-05 | PDR5      |
| YBR162C   | 1235.72568 | 918.155408 | 1128.80469 | 1418.61438  | 1397.60998 | 1508.38585 | 0.397743479 | 10.3083041 | 0.000451422 | TOS1      |
| YER035W   | 22.6877419 | 21.2962325 | 21.0024251 | 27.7904617  | 29.1901757 | 28.600194  | 0.397447682 | 4.65537736 | 0.000264542 | EDC2      |
| YCL041C   | 2.82774755 | 2.18718064 | 2.05787451 | 3.37033259  | 2.80173562 | 3.09889235 | 0.397315832 | 1.5067377  | 0.105768345 | YCL041C   |
| YDR476C   | 39.1281347 | 29.584496  | 35.4075467 | 46.7116272  | 45.6096496 | 44.3528967 | 0.394273293 | 5.33020476 | 0.000400749 | YDR476C   |
| YOR213C   | 17.6898626 | 20.2026422 | 17.8550876 | 26.0757311  | 24.2382709 | 22.9834516 | 0.394216086 | 4.43523889 | 0.00112856  | SAS5      |
| YDL062W   | 208.727226 | 184.759206 | 210.992663 | 280.447149  | 259.975003 | 253.39921  | 0.393366776 | 7.86517736 | 2.97485E-05 | PYC1      |
| YDR380W   | 220.827355 | 181.363321 | 192.290215 | 256.9273078 | 263.558618 | 259.984156 | 0.393070846 | 7.84083706 | 4.57886E-05 | ARO10     |
| YMR103C   | 5.85277981 | 4.77726297 | 6.29467496 | 8.51452445  | 7.49301386 | 6.13322444 | 0.391154297 | 2.72938682 | 0.049594929 | YMR103C   |
| YDL173W   | 75.3627602 | 73.2129939 | 67.3046015 | 95.9066573  | 89.6555398 | 97.2923077 | 0.390154522 | 6.37908028 | 4.99937E-06 | PAR32     |
| YNL043C   | 12.56046   | 9.78475547 | 15.4340588 | 18.5072649  | 15.7027508 | 15.1716605 | 0.388225423 | 3.87228272 | 0.028997262 | YNL043C   |
| YLL018C-A | 4.66907153 | 4.77726297 | 4.17627473 | 6.14937877  | 6.25503766 | 5.42306161 | 0.3880169   | 2.42263935 | 0.037014751 | COX19     |
| YLL047W   | 0          | 0.51801647 | 0.12105144 | 0.29564321  | 0.39093985 | 0.19368077 | 0.388008768 | -1.3891349 | 0.577971269 | YLL047W   |

|           |            |            |            |            |            |            |             |            |              |           |
|-----------|------------|------------|------------|------------|------------|------------|-------------|------------|--------------|-----------|
| YHR126C   | 0.06576157 | 0.23022954 | 0.12105144 | 0.17738593 | 0.26062657 | 0.12912051 | 0.387938481 | -1.7905638 | 0.812770335  | ANS1      |
| YOR219C   | 110.347916 | 99.2864894 | 100.956902 | 129.136954 | 137.936612 | 139.191915 | 0.387607893 | 6.90174595 | 5.27738E-06  | STE13     |
| YOL129W   | 148.884196 | 115.978131 | 157.608977 | 174.192979 | 185.761587 | 192.583247 | 0.38742901  | 7.34510077 | 0.000481903  | VPS68     |
| YGL012W   | 636.769291 | 531.254665 | 618.572867 | 766.602844 | 780.641731 | 787.95794  | 0.386401845 | 9.42429655 | 7.71644E-05  | ERG4      |
| YGL168W   | 12.8892679 | 11.511477  | 14.8288016 | 16.2012479 | 16.1588473 | 18.9161554 | 0.386334235 | 3.92518408 | 0.009805535  | HUR1      |
| YGR060W   | 601.323804 | 453.609752 | 545.942002 | 664.369422 | 697.957952 | 728.110581 | 0.385033367 | 9.26515267 | 0.000481932  | ERG25     |
| YHL002C-A | 6.83920337 | 7.30978791 | 9.26043528 | 11.1161847 | 9.7083397  | 9.74859885 | 0.384825422 | 3.18971606 | 0.02643028   | YHL002C-A |
| YOL052C-A | 0.13152314 | 0.05755739 | 0.24210288 | 0.17738593 | 0.26062657 | 0.12912051 | 0.384044574 | -1.7901257 | 0.812833366  | DDR2      |
| YBR043C   | 81.3470632 | 68.4357309 | 76.2624082 | 96.6753297 | 96.7576138 | 101.359604 | 0.383751465 | 6.44135139 | 1.52603E-05  | QDR3      |
| YDR508C   | 580.608909 | 495.166184 | 586.252132 | 731.598688 | 717.244318 | 719.459507 | 0.383696911 | 9.31851942 | 7.72699E-05  | GNP1      |
| YKR047W   | 14.1387377 | 14.3317889 | 15.0709045 | 20.7541533 | 17.5271368 | 18.4642336 | 0.382905557 | 4.07375979 | 0.003964652  | YKR047W   |
| YOL165C   | 0.39456943 | 0.80580339 | 0.78683437 | 1.30083012 | 0.52125314 | 0.77472309 | 0.382219282 | -0.1564595 | 0.389466986  | AAD15     |
| YKL051W   | 46.8222385 | 40.1174974 | 47.1495365 | 56.3495958 | 62.7458465 | 55.3281405 | 0.379911392 | 5.68698814 | 0.000135332  | SKF1      |
| YGR209C   | 86.6079888 | 86.0482908 | 74.7492652 | 136.646292 | 118.128992 | 67.013547  | 0.37950153  | 6.56994772 | 0.0039344058 | TRX2      |
| YHL027W   | 115.148511 | 112.639803 | 115.42255  | 152.197125 | 145.885722 | 147.584748 | 0.37702535  | 7.03993345 | 2.45323E-06  | RIM101    |
| YLR214W   | 116.200696 | 87.5447828 | 95.2069588 | 122.928447 | 140.217094 | 124.730417 | 0.376221341 | 6.83988669 | 0.000459867  | FRE1      |
| YGR055W   | 484.662777 | 390.872202 | 461.871775 | 587.79783  | 572.661729 | 575.167332 | 0.376146507 | 9.0007602  | 0.000172396  | MUP1      |
| YOL147C   | 24.4633044 | 19.4543962 | 25.2997513 | 30.5103793 | 29.5811156 | 29.6331581 | 0.37593356  | 4.73306356 | 0.002117584  | PEX11     |
| YJL067W   | 1.77556241 | 0.92091816 | 0.96841153 | 1.65560198 | 1.30313285 | 1.74312695 | 0.374478153 | 0.59381329 | 0.283162587  | YJL067W   |
| YDR119W-A | 0.39456943 | 0.69068862 | 0.06052572 | 0.53215778 | 0.39093985 | 0.58104232 | 0.374191588 | -0.8167792 | 0.595836118  | COX26     |
| YOL054W   | 23.2138345 | 24.1741018 | 25.4813285 | 35.2406706 | 32.9041043 | 26.2760247 | 0.374185283 | 4.80784763 | 0.003014487  | PSH1      |
| YLR138W   | 279.157868 | 216.876227 | 269.399983 | 343.714796 | 320.114583 | 327.966107 | 0.374017304 | 8.19461301 | 0.000400421  | NHA1      |
| YNL320W   | 50.8994559 | 38.4483333 | 51.5679141 | 63.1493897 | 60.8563039 | 58.4270328 | 0.373754198 | 5.75467406 | 0.00089662   | YNL320W   |
| YDL168W   | 118.370828 | 116.496148 | 121.838276 | 160.416006 | 152.792326 | 148.875953 | 0.373582564 | 7.09360727 | 5.59567E-06  | SFA1      |
| YPL205C   | 1.24946985 | 1.1511477  | 1.33156586 | 1.65560198 | 1.49860277 | 1.67856669 | 0.37323603  | 0.63154175 | 0.225943536  | YPL205C   |
| YEL057C   | 3.09079383 | 3.22321357 | 2.9052346  | 3.84336173 | 4.56096496 | 3.55081415 | 0.372442598 | 1.86685371 | 0.087443172  | YEL057C   |
| YGR213C   | 4.7348331  | 7.02200099 | 6.77888073 | 6.91805112 | 8.20973693 | 8.9093155  | 0.368544513 | 2.85167704 | 0.06228364   | RTA1      |
| YER150W   | 12.6919832 | 11.4539196 | 11.3183098 | 14.9595464 | 14.5299312 | 16.2046246 | 0.366602371 | 3.76926357 | 0.008605172  | SPH1      |
| YJR037W   | 0.65761571 | 0.46045908 | 1.02893725 | 0.88692963 | 0.71672306 | 1.16208463 | 0.365500935 | -0.089351  | 0.396403219  | YJR037W   |
| YBR230C   | 40.9694586 | 36.8367265 | 40.6732844 | 53.3340351 | 53.9496998 | 45.1921801 | 0.364823535 | 5.50049124 | 0.000333736  | OM14      |
| YPL107W   | 9.53542778 | 9.78475547 | 7.98939514 | 13.3630731 | 9.7083397  | 12.0082079 | 0.362712772 | 3.39590666 | 0.038124639  | YPL107W   |
| YEL033W   | 12.2974138 | 10.2452146 | 9.44201244 | 13.4222017 | 14.7254012 | 12.8474912 | 0.359816439 | 3.61670394 | 0.021579811  | MTG7      |
| YLL039C   | 123.039899 | 136.46856  | 127.709271 | 169.167045 | 159.50346  | 168.17947  | 0.359428447 | 7.20424282 | 2.20483E-05  | UBI4      |
| YER015W   | 22.4246957 | 21.814249  | 22.4550424 | 27.4356899 | 29.1901757 | 28.9229953 | 0.358872598 | 4.67142045 | 0.000864892  | FAA2      |
| YJL139C   | 38.470519  | 35.0524476 | 39.8259243 | 48.071586  | 47.4991922 | 49.7113981 | 0.358592591 | 5.43337805 | 0.000127547  | YUR1      |
| YBR162W-A | 2.10437027 | 3.68367265 | 1.99734879 | 3.54771852 | 3.19267547 | 3.29257312 | 0.358117246 | 1.63399949 | 0.17959824   | YSY6      |
| YHR097C   | 40.2460814 | 36.1460379 | 37.8285755 | 46.0612121 | 47.9552887 | 52.1646879 | 0.356258712 | 5.44295573 | 0.000216579  | YHR097C   |
| YDR345C   | 1984.81573 | 1495.80133 | 2020.95382 | 2212.88943 | 2375.22024 | 2454.32274 | 0.356247704 | 11.0298063 | 0.002727422  | HXT3      |
| YLL020C   | 3.55112483 | 3.16565618 | 3.75259469 | 4.43464815 | 4.56096496 | 4.39009749 | 0.355341565 | 2.03302218 | 0.081851716  | YLL020C   |
| YER135C   | 0.65761571 | 0.4029017  | 0.66578293 | 0.65041506 | 0.32578321 | 1.22664489 | 0.354968927 | -0.3681219 | 0.534232275  | YER135C   |
| YMR035W   | 14.4675456 | 17.6125599 | 17.6129848 | 18.8620368 | 20.394029  | 24.4037772 | 0.354700236 | 4.24854584 | 0.013949117  | IMP2      |
| YOR203W   | 0.78913885 | 0.97847555 | 0.96841153 | 1.24170148 | 1.10766292 | 1.16208463 | 0.353982573 | 0.22223118 | 0.30407692   | YOR203W   |
| YJL165C   | 90.6194447 | 85.1273726 | 87.0965122 | 115.714752 | 107.11752  | 112.91589  | 0.353632595 | 6.64208418 | 1.65482E-05  | HAL5      |
| YDR319C   | 33.7356859 | 28.7786926 | 30.0812832 | 39.143161  | 39.0939854 | 39.9627992 | 0.353500489 | 5.13893544 | 0.000476685  | YFT2      |
| YLR191W   | 30.9736999 | 31.6565618 | 28.6891917 | 41.5083067 | 36.422563  | 38.6715941 | 0.353155541 | 5.11999116 | 0.000547456  | PEX13     |
| YPL154C   | 603.362413 | 471.625214 | 560.165546 | 709.011546 | 684.2099   | 694.732928 | 0.352778295 | 9.27755245 | 0.000712698  | PEP4      |
| YGL263W   | 3.55112483 | 3.56855788 | 2.78418316 | 3.07468938 | 4.75643489 | 4.84201929 | 0.350786642 | 1.95228169 | 0.147467479  | COS12     |
| YHR177W   | 19.005094  | 16.7491991 | 17.7945619 | 22.0549835 | 23.3912346 | 22.7252106 | 0.349133746 | 4.34988889 | 0.00347331   | YHR177W   |
| YPL135W   | 51.8201178 | 43.7436127 | 54.6547259 | 65.3371494 | 66.4597751 | 59.2663162 | 0.347779554 | 5.83254216 | 0.000610314  | ISU1      |
| YOL112W   | 38.010188  | 35.6280214 | 37.7680498 | 52.2697195 | 43.7688538 | 46.1605839 | 0.347523461 | 5.40239938 | 0.000671652  | MSB4      |
| YJR161C   | 27.0937672 | 23.7136427 | 27.1155229 | 33.2302968 | 33.2298876 | 32.5383697 | 0.346421668 | 4.8872479  | 0.01079769   | COS5      |
| YKL097C   | 0.19728471 | 0.17267216 | 0.12105144 | 0.29564321 | 0.32578321 | 0          | 0.345066001 | -1.6908989 | 0.825047098  | YKL097C   |
| YGL055W   | 841.485061 | 659.377404 | 886.096552 | 912.768847 | 1033.12372 | 1085.06424 | 0.344619204 | 9.81869345 | 0.003954769  | OLE1      |
| YJR038C   | 0.78913885 | 0.4029017  | 0.84736009 | 0.94605827 | 0.65156642 | 0.96840386 | 0.34429108  | -0.1708226 | 0.484747482  | YJR038C   |
| YDL010W   | 23.4111192 | 21.6415768 | 17.3708819 | 29.2686778 | 26.1929702 | 23.6936144 | 0.344179291 | 4.56767791 | 0.012760864  | GRX6      |
| YGL179C   | 19.465425  | 25.9583807 | 23.9076597 | 28.4408768 | 29.4508023 | 30.1496401 | 0.342121763 | 4.72011003 | 0.005603931  | TOS3      |
| YEL046C   | 622.959361 | 467.481082 | 606.528248 | 701.206566 | 718.873234 | 725.011689 | 0.33816483  | 9.32290414 | 0.002641906  | GLY1      |
| YER158W-A | 2.17013184 | 1.95695109 | 2.60260599 | 3.60684716 | 2.41079576 | 2.45328978 | 0.337916899 | 1.41267082 | 0.200002982  | YER158W-A |
| YML118W   | 8.08867322 | 10.1876572 | 9.13938384 | 12.0031143 | 10.4250628 | 12.2664489 | 0.337512918 | 3.38984162 | 0.036905458  | NGL3      |
| YJL089W   | 1.38099299 | 1.1511477  | 1.1499887  | 1.71473062 | 1.36828949 | 1.54944617 | 0.337451484 | 0.59247068 | 0.280073032  | SIP4      |
| YOL024W   | 0.98642356 | 1.1511477  | 0.78683437 | 1.18257284 | 1.04250628 | 1.48488592 | 0.337168194 | 0.29725556 | 0.328249276  | YOL024W   |
| YHL016C   | 24.9893969 | 19.1090519 | 24.5734426 | 29.7417069 | 27.6264163 | 29.2457965 | 0.336832794 | 4.6996009  | 0.007571272  | DUR3      |
| YLR152C   | 35.1824404 | 27.9728892 | 31.1102205 | 41.3309208 | 39.7455518 | 37.7677505 | 0.336206478 | 5.15470057 | 0.002122045  | YLR152C   |
| YNL210W   | 14.6648303 | 12.9504117 | 14.0419672 | 15.4917042 | 17.2013536 | 19.8845592 | 0.335645183 | 3.98236377 | 0.019767801  | MER1      |
| YDR293C   | 393.056909 | 344.998967 | 387.12251  | 468.180587 | 485.156358 | 466.125057 | 0.335274312 | 8.72862763 | 0.000285448  | SSD1      |
| YFL012W-A | 0.06576157 | 0          | 0.18157716 | 0.05912864 | 0.19546993 | 0.06456026 | 0.334629358 | -2.2051075 | 1            | YFL012W-A |
| YBL073W   | 0.59185414 | 0.74824601 | 1.08946297 | 0.94605827 | 1.43344613 | 0.71016283 | 0.334427317 | 0.0606838  | 0.383074857  | YBL073W   |
| YDR039C   | 191.366171 | 160.067088 | 176.735105 | 233.025978 | 217.427715 | 214.791976 | 0.333272605 | 7.63668254 | 0.000487885  | ENA2      |
| YIR042C   | 1.70980084 | 2.53252495 | 1.7552459  | 2.66078889 | 2.9320489  | 2.00136798 | 0.333250378 | 1.25937602 | 0.233941357  | YIR042C   |
| YDL057W   | 9.99575877 | 10.9359032 | 9.62358961 | 11.2935706 | 13.6828949 | 13.557654  | 0.332040898 | 3.53920389 | 0.031756664  | YDL057W   |
| YDR074W   | 233.913908 | 239.150935 | 225.821464 | 309.774955 | 290.403155 | 279.352233 | 0.331734119 | 8.03995941 | 0.000225775  | TPS2      |
| YOR287C   | 9.40390463 | 10.8207884 | 9.68411533 | 12.0031143 | 12.7055452 | 12.9766117 | 0.330917856 | 3.50906386 | 0.024857341  | RRP36     |
| YMR052W   | 4.01145582 | 4.71970558 | 4.05522329 | 4.73029136 | 5.47315795 | 5.93954367 | 0.330863943 | 2.30430433 | 0.087333794  | FAR3      |

|           |            |            |            |            |            |            |             |            |             |           |
|-----------|------------|------------|------------|------------|------------|------------|-------------|------------|-------------|-----------|
| YOR289W   | 9.60118935 | 11.1085753 | 11.0156812 | 13.4222017 | 12.9010152 | 13.6222143 | 0.330512803 | 3.59330797 | 0.023290511 | YOR289W   |
| YLR390W-A | 613.029364 | 479.683248 | 643.751566 | 640.658836 | 733.272852 | 807.777939 | 0.329325098 | 9.35118343 | 0.007692115 | CCW14     |
| YJR020W   | 7.43105751 | 5.06504989 | 6.05257208 | 6.97717976 | 8.014267   | 8.26371293 | 0.32907735  | 2.82075713 | 0.088548268 | YJR020W   |
| YCR047C   | 61.8816382 | 48.4057609 | 62.220441  | 78.5819652 | 72.128403  | 65.7223419 | 0.32841166  | 6.02086337 | 0.003022254 | BUD23     |
| YML066C   | 20.386087  | 18.0154615 | 21.1234766 | 22.8827845 | 25.1504639 | 26.6633862 | 0.327526507 | 4.49003724 | 0.007483532 | SM2       |
| YPR153W   | 3.22231697 | 3.05054141 | 4.23680046 | 4.37551951 | 4.03971182 | 4.77745904 | 0.327408506 | 2.02516363 | 0.12539198  | YPR153W   |
| YJL156W-A | 0.72337728 | 0.74824601 | 0.42368005 | 1.00518691 | 0.58640978 | 0.77472309 | 0.32692395  | -0.258227  | 0.530369096 | YJL156W-A |
| YHR139C   | 4.66907153 | 3.8563448  | 4.59995478 | 5.97199284 | 5.73378452 | 4.71289878 | 0.326724697 | 2.3341049  | 0.099776757 | SPS100    |
| YKR098C   | 27.0280056 | 29.8147255 | 28.8707688 | 33.7033259 | 38.6378889 | 35.2499005 | 0.326392539 | 5.01483902 | 0.001906697 | UBP11     |
| YGR048W   | 43.9287293 | 49.9598103 | 44.8495591 | 63.5632902 | 56.7514354 | 53.5850135 | 0.325762289 | 5.70705417 | 0.000990575 | UFD1      |
| YIL102C-A | 0.85490042 | 0.97847555 | 1.08946297 | 0.53215778 | 1.6940727  | 1.48488592 | 0.32535757  | 0.28673657 | 0.385080733 | YIL102C-A |
| YDR358W   | 30.9736999 | 32.1745783 | 28.7497174 | 42.5134936 | 33.685984  | 38.8652749 | 0.325046778 | 5.1136195  | 0.003814316 | GGA1      |
| YLR312C   | 5.12940253 | 4.37436127 | 4.29732618 | 6.09025013 | 5.34284467 | 5.81042315 | 0.325031373 | 2.40358212 | 0.086518341 | YLR312C   |
| YMR134W   | 17.3610547 | 18.0730189 | 15.1919559 | 23.5331995 | 20.8201255 | 18.9807156 | 0.324618932 | 4.25739747 | 0.017591239 | ERG29     |
| YBL098W   | 58.1989902 | 64.5218287 | 53.3836857 | 77.1037492 | 71.8677764 | 71.532765  | 0.324193655 | 6.04933319 | 0.000522478 | BNA4      |
| YOR036W   | 18.4790014 | 18.8788223 | 19.4892821 | 26.3122457 | 21.1759087 | 23.6290542 | 0.323986854 | 4.42327601 | 0.009171153 | PEP12     |
| YGL180W   | 27.8171445 | 29.1815943 | 29.2944489 | 37.2510445 | 36.8786595 | 33.8941351 | 0.323806182 | 5.02267959 | 0.001360201 | ATG1      |
| YLR334C   | 0.13152314 | 0.11511477 | 0.3026286  | 0.11825728 | 0.13031328 | 0.4519218  | 0.320558222 | -1.5973686 | 0.83498917  | YLR334C   |
| YBL078C   | 3.87993268 | 4.94993152 | 5.38678915 | 6.79979383 | 6.71113415 | 4.26097698 | 0.32039086  | 2.45033266 | 0.160287886 | ATG8      |
| YHL043W   | 4.66907153 | 3.45344311 | 3.81312041 | 5.61722099 | 5.0822181  | 4.13185646 | 0.31987044  | 2.19476166 | 0.141036113 | ECM34     |
| YPR142C   | 3.28807854 | 4.08657435 | 5.14468627 | 5.85373556 | 4.30033839 | 5.48762187 | 0.31959752  | 2.27104627 | 0.154675421 | YPR142C   |
| YNL003C   | 46.6907153 | 38.563448  | 43.0943132 | 51.2645326 | 52.1904705 | 56.6193456 | 0.31956831  | 5.58999842 | 0.001286248 | PET8      |
| YPR138C   | 106.73103  | 94.0487673 | 101.804262 | 132.507287 | 127.772175 | 117.112307 | 0.319321531 | 6.82577998 | 0.000312859 | MEP3      |
| YER137C   | 1.70980084 | 2.30229541 | 0.90788581 | 1.95124519 | 1.95469927 | 2.259609   | 0.319125795 | 0.97958157 | 0.315447397 | YER137C   |
| YNL020C   | 60.1718373 | 58.9963198 | 62.5835953 | 74.8568608 | 78.5789106 | 73.275892  | 0.318824065 | 6.09145389 | 0.000146691 | ARK1      |
| YJL116C   | 25.9100589 | 24.4618887 | 25.1181741 | 29.8008356 | 20.4281519 | 33.7650145 | 0.316249925 | 4.82548678 | 0.003342441 | NCA3      |
| YDR179C   | 2.49893969 | 2.53252495 | 1.81577162 | 3.25207531 | 2.60626569 | 2.64697055 | 0.316024726 | 1.42439074 | 0.216519241 | CSN9      |
| YNL109W   | 7.43105751 | 10.6481163 | 9.74464105 | 13.7769736 | 10.3599061 | 10.5233219 | 0.315651674 | 3.40077153 | 0.094347451 | YNL109W   |
| YHR105W   | 7.2337728  | 7.54001745 | 7.14203505 | 10.7614128 | 9.31739984 | 7.16618856 | 0.315568091 | 3.05739278 | 0.090879512 | YPT35     |
| YER119C-A | 1.1179467  | 1.1511477  | 1.21051442 | 1.41908741 | 1.95469927 | 0.96840386 | 0.315321868 | 0.5112406  | 0.354095256 | YER119C-A |
| YOR356W   | 139.217246 | 135.662757 | 153.251125 | 176.32161  | 176.76997  | 179.542075 | 0.315070217 | 7.32408366 | 0.00285558  | CIR2      |
| YGL239C   | 5.1951641  | 3.51100049 | 3.26838892 | 5.73547828 | 5.01706145 | 4.06729621 | 0.315052467 | 2.19527116 | 0.193327619 | YGL239C   |
| YEL071W   | 155.460354 | 156.556088 | 150.103788 | 186.37348  | 191.430215 | 196.973345 | 0.314647556 | 7.43400922 | 0.000211788 | DL3       |
| YPL136W   | 3.87993268 | 1.03603293 | 2.29997739 | 4.49377679 | 2.41079576 | 2.00136798 | 0.314270733 | 1.48622993 | 0.471095839 | YPL136W   |
| YNL196C   | 5.12940253 | 4.60459081 | 4.05522329 | 5.14419185 | 6.25503766 | 5.7458629  | 0.313976771 | 2.39647577 | 0.107139441 | SLZ1      |
| YNL278W   | 53.1353493 | 54.2190568 | 61.6757095 | 58.5964842 | 75.8423316 | 75.793742  | 0.313756053 | 5.98430765 | 0.004717172 | CAF120    |
| YJL020C   | 313.1566   | 272.822006 | 300.449678 | 379.66501  | 369.829101 | 352.111643 | 0.313704334 | 8.37262923 | 0.000739191 | BBC1      |
| YOR366W   | 0.72337728 | 0.57557385 | 0.66578293 | 1.24170148 | 0.78187971 | 0.38736154 | 0.312587904 | -0.2232882 | 0.553625972 | YOR366W   |
| YBR295W   | 61.750115  | 52.6650074 | 57.438909  | 69.9491835 | 70.7601135 | 72.5657292 | 0.312329679 | 6.00650619 | 0.000457817 | PCA1      |
| YOR328W   | 68.3262721 | 59.1114345 | 70.028259  | 73.2603875 | 83.0095622 | 88.834914  | 0.311793707 | 6.20661886 | 0.001734621 | PDR10     |
| YIL101C   | 36.5634334 | 31.4263323 | 33.4707236 | 39.2022897 | 43.2640105 | 43.3844929 | 0.311320198 | 5.24726405 | 0.002341043 | XBP1      |
| YKR041W   | 8.02291165 | 7.30978791 | 9.62358961 | 10.8205415 | 9.64318305 | 10.4587617 | 0.310278324 | 3.23768046 | 0.062846702 | YKR041W   |
| YBR126W-B | 0.78913885 | 0.97847555 | 0.78683437 | 1.65560198 | 0.91219299 | 0.58104232 | 0.309980691 | 0.11497102 | 0.459856972 | YBR126W-B |
| YER184C   | 19.8599944 | 20.6631013 | 19.9734879 | 24.2427432 | 24.1079576 | 26.6633862 | 0.309511565 | 4.50463304 | 0.00665998  | TOG1      |
| YOL084W   | 11.9028443 | 8.40337823 | 9.92621821 | 13.3630731 | 12.1842921 | 11.8145271 | 0.309407202 | 3.50748668 | 0.06940639  | PHM7      |
| YOR050C   | 1.05218513 | 1.38137724 | 1.39209158 | 1.89211654 | 1.75922934 | 1.09752437 | 0.309110358 | 0.63977273 | 0.344420139 | YOR050C   |
| YLL019C   | 126.85407  | 118.050197 | 126.438231 | 143.919115 | 154.421242 | 161.594324 | 0.30865417  | 7.11527428 | 0.000328321 | KNS1      |
| YGR037C   | 51.2282637 | 57.9602868 | 48.3600509 | 66.3423363 | 60.5305207 | 68.3047522 | 0.308525931 | 5.88048887 | 0.001390579 | ACB1      |
| YOR306C   | 120.804006 | 110.222393 | 130.614505 | 141.435712 | 144.843216 | 161.529764 | 0.308336476 | 7.07693139 | 0.001015483 | MCH5      |
| YLR140W   | 2.82774755 | 2.30229541 | 2.9052346  | 4.96680593 | 3.19267547 | 1.74312695 | 0.307854207 | 1.64353392 | 0.352077478 | YLR140W   |
| YEL058W   | 280.670384 | 245.252018 | 273.031527 | 339.989692 | 324.154295 | 324.673534 | 0.307780993 | 8.2195045  | 0.000811997 | PCM1      |
| YOL058W   | 33.9329706 | 28.1455613 | 31.0496948 | 35.8910857 | 37.8560092 | 41.4476852 | 0.307554832 | 5.1217142  | 0.004829601 | ARG1      |
| YDL248W   | 29.3296606 | 25.9583807 | 31.7760034 | 38.7292605 | 35.6406833 | 33.2485325 | 0.307012631 | 5.02522687 | 0.006914908 | COS7      |
| YFR054C   | 0.59185414 | 0.23022954 | 0.66578293 | 0.47302914 | 0.58640978 | 0.77472309 | 0.306821872 | -0.5742114 | 0.629545864 | YFR054C   |
| YLL012W   | 70.2333577 | 63.1404515 | 67.7282816 | 87.1556183 | 84.5733217 | 76.8267061 | 0.306428412 | 6.22988015 | 0.00523127  | YEH1      |
| YOR072W-A | 0.460331   | 0.17267216 | 0.54473149 | 0.47302914 | 0.26062657 | 0.71016283 | 0.305940619 | -0.8422225 | 0.681909957 | YOR072W-A |
| YLR109W   | 656.300477 | 768.160862 | 575.841708 | 802.90783  | 819.47509  | 849.161064 | 0.305137499 | 9.54192405 | 0.005532168 | AHP1      |
| YMR295C   | 119.751821 | 118.856    | 105.79896  | 174.961652 | 145.950879 | 104.135695 | 0.30381806  | 7.00429278 | 0.034431517 | YMR295C   |
| YAR029W   | 0.52609257 | 1.1511477  | 0.78683437 | 0.94605827 | 1.30313285 | 0.83928334 | 0.303287092 | 0.07408444 | 0.430884356 | YAR029W   |
| YBL096C   | 3.28807854 | 3.39588572 | 4.05522329 | 4.37551951 | 3.58361532 | 5.2939411  | 0.302080915 | 2.0429411  | 0.17063449  | YBL096C   |
| YIR025W   | 10.2588051 | 7.19467314 | 7.80781798 | 10.9979274 | 10.0341229 | 10.0068399 | 0.301615212 | 3.24635838 | 0.094129527 | MND2      |
| YKL084W   | 11.7055596 | 10.3027719 | 13.8603901 | 16.2012479 | 15.1814976 | 12.7829309 | 0.30160939  | 3.75060393 | 0.065389051 | HOT13     |
| YOR374W   | 181.633459 | 160.642662 | 164.448383 | 215.11     | 202.637157 | 206.592823 | 0.301456518 | 7.55932878 | 0.000855734 | ALD4      |
| YFR039C   | 87.3971277 | 76.4362075 | 82.8597118 | 104.894211 | 99.2987228 | 99.616477  | 0.301200801 | 6.52135245 | 0.000449253 | OSW7      |
| YPR169W-A | 0.85490042 | 1.03603293 | 0.60525721 | 0.76867235 | 1.43344613 | 0.9038436  | 0.300845827 | 0.0754156  | 0.431373692 | YPR169W-A |
| YNL305C   | 66.5507097 | 50.362712  | 55.7441889 | 71.6639141 | 70.6298002 | 70.1769996 | 0.30066312  | 6.00637653 | 0.003574312 | BX1       |
| YLR157W   | 77.5328921 | 95.3725872 | 75.5966253 | 106.66807  | 99.4290361 | 100.003839 | 0.300261583 | 6.53242486 | 0.002454226 | ARI1      |
| YER087C-B | 37.6156185 | 28.8938073 | 31.3523234 | 55.7583094 | 37.4650693 | 27.1153081 | 0.299752904 | 5.19002873 | 0.130020594 | SBH1      |
| YBL113C   | 93.8417616 | 79.8896506 | 93.2701357 | 114.413922 | 114.024124 | 100.068399 | 0.299688962 | 6.63458551 | 0.001603129 | YBL113C   |
| YLR417W   | 34.7221094 | 34.0164146 | 30.6865404 | 41.9813358 | 39.9410217 | 40.3501608 | 0.299006621 | 5.21199358 | 0.002292588 | VPS36     |
| YGL072C   | 6.18158766 | 4.6621482  | 5.14468627 | 7.33195161 | 5.99441109 | 6.26234495 | 0.298807105 | 2.59599172 | 0.121319355 | YGL072C   |
| YJR106W   | 61.0267378 | 47.8301871 | 56.2889203 | 59.7790571 | 68.0235345 | 75.2126997 | 0.298225289 | 5.94122773 | 0.007429216 | ECM27     |
| YIR020W-A | 0.85490042 | 0.63313124 | 0.66578293 | 0.82780099 | 0.58640978 | 1.22664489 | 0.29820805  | -0.1212866 | 0.499375247 | YIR020W-A |

|           |            |            |            |            |            |            |             |            |             |           |
|-----------|------------|------------|------------|------------|------------|------------|-------------|------------|-------------|-----------|
| YLR400W   | 4.07721739 | 2.59008233 | 3.02628604 | 4.19813358 | 3.64877197 | 4.00273595 | 0.298019286 | 1.88839606 | 0.209355233 | YLR400W   |
| YPL087W   | 77.5328921 | 62.9677793 | 72.0256077 | 96.2614292 | 82.8140923 | 81.8624062 | 0.297267369 | 6.30420766 | 0.003187381 | YDC1      |
| YPR001W   | 8.48324264 | 8.17314869 | 7.5657151  | 7.68672346 | 10.555376  | 11.5562861 | 0.29659817  | 3.18642116 | 0.109257726 | CIT3      |
| YLR280C   | 0.59185414 | 0          | 0.54473149 | 0.76867235 | 0.39093985 | 0.19368077 | 0.296494191 | -0.8968894 | 0.703550518 | YLR280C   |
| YFL014W   | 21.5040337 | 25.0950199 | 19.7919107 | 39.4979329 | 23.0002947 | 18.9807156 | 0.296382634 | 4.63305709 | 0.16684059  | HSP12     |
| YDL128W   | 188.012331 | 151.260808 | 180.790328 | 211.325767 | 207.654219 | 219.311194 | 0.295827437 | 7.59363105 | 0.002937136 | VCX1      |
| YLR126C   | 16.4403927 | 17.3247729 | 18.3998191 | 23.5923282 | 20.5243423 | 19.8845592 | 0.295463182 | 4.28471616 | 0.02157779  | YLR126C   |
| YNL044W   | 80.0318317 | 66.5938946 | 76.5650368 | 78.8184798 | 93.434625  | 101.359604 | 0.293895227 | 6.37306327 | 0.005725419 | YIP3      |
| YHR190W   | 349.588511 | 302.809403 | 330.046755 | 434.891162 | 397.325205 | 371.931642 | 0.293760339 | 8.50995379 | 0.002762963 | ERG9      |
| YNL237W   | 32.946547  | 30.5054141 | 33.4101979 | 40.3257339 | 37.2695994 | 40.9957634 | 0.292749889 | 5.17082518 | 0.00308251  | YTP1      |
| YDR154C   | 863.975518 | 616.209365 | 722.798158 | 1065.55726 | 863.52098  | 769.041785 | 0.292600669 | 9.67412329 | 0.033937468 | YDR154C   |
| YFR030W   | 114.622418 | 87.8325697 | 113.727829 | 127.717867 | 128.488899 | 130.928202 | 0.292600296 | 6.87424803 | 0.004521328 | MET10     |
| YPL020C   | 46.3619075 | 42.4773502 | 44.8495591 | 57.8869405 | 54.4709529 | 51.2608443 | 0.292512075 | 5.63421256 | 0.001569405 | ULP1      |
| YJL064W   | 5.72125667 | 7.19467314 | 6.05257208 | 9.40145408 | 7.36270058 | 6.45602573 | 0.291815365 | 2.84226788 | 0.138791258 | YJL064W   |
| YML109W   | 50.1760786 | 47.9453018 | 49.8126682 | 62.4989746 | 59.4880144 | 59.0080751 | 0.291583583 | 5.7797148  | 0.000693456 | ZDS2      |
| YPL055C   | 25.3182048 | 25.3828068 | 28.2655116 | 29.9782215 | 32.057068  | 34.6688582 | 0.291405409 | 4.87717151 | 0.007921087 | LGE1      |
| YGR045C   | 0.32880785 | 0.28778693 | 0.3026286  | 0.59128642 | 0.26062657 | 0.25824103 | 0.29138634  | -1.1062815 | 0.750041242 | YGR045C   |
| YMR153C-A | 4.34026368 | 5.69818113 | 3.57101753 | 5.79460692 | 4.82159153 | 6.06866418 | 0.291252304 | 2.37267174 | 0.18919122  | YMR153C-A |
| YOR035C   | 49.189655  | 46.5639246 | 47.6337423 | 61.9076882 | 59.4880144 | 53.9723751 | 0.29124075  | 5.7345203  | 0.001440378 | SHE4      |
| YGR149W   | 46.6907153 | 37.5274151 | 46.4837536 | 47.066399  | 67.995306  | 61.0094431 | 0.290913706 | 5.60047841 | 0.014049025 | YGR149W   |
| YOR263C   | 6.3131108  | 7.30978791 | 4.96310911 | 6.38589334 | 8.14458028 | 8.26371293 | 0.290805823 | 2.80936796 | 0.148502878 | YOR263C   |
| YDR149C   | 2.89350912 | 2.76275449 | 2.78418316 | 2.18775975 | 3.71392861 | 4.45465775 | 0.289194638 | 1.69558453 | 0.281391964 | YDR149C   |
| YMR121C   | 22.8850267 | 20.317757  | 20.820848  | 25.6618306 | 27.2354765 | 25.2430606 | 0.288368003 | 4.57293136 | 0.01187285  | RPL15B    |
| YPR049C   | 49.0581319 | 47.6575149 | 50.7810797 | 59.5425425 | 61.2472437 | 59.2663162 | 0.287784699 | 5.77358393 | 0.000781468 | ATG11     |
| YNL294C   | 73.2583899 | 63.1980089 | 72.6913907 | 90.9398514 | 84.3126951 | 79.8610382 | 0.287556344 | 6.2759364  | 0.001840118 | RIM21     |
| YOR077W   | 5.52397195 | 6.90688622 | 5.44731487 | 6.38589334 | 7.75364043 | 7.7423087  | 0.286716644 | 2.7541243  | 0.012077639 | RTS2      |
| YGR121C   | 52.6750183 | 46.7941541 | 54.4731487 | 59.6016711 | 64.114136  | 64.0437752 | 0.286715406 | 5.83422303 | 0.001847339 | MEP1      |
| YDR351W   | 103.245666 | 103.027719 | 110.03576  | 128.309153 | 125.947789 | 131.573804 | 0.28657555  | 6.87206636 | 0.000408972 | SBE2      |
| YMR280C   | 36.168864  | 34.3617589 | 36.0733296 | 42.6908795 | 43.6549503 | 43.6427339 | 0.286324277 | 5.30533425 | 0.001948705 | CAT8      |
| YNL092W   | 8.02291165 | 6.84932883 | 6.35520068 | 9.34232544 | 8.60067678 | 7.87635139 | 0.286029079 | 2.99235725 | 0.100560971 | YNL092W   |
| YKL217W   | 14.2044993 | 12.3748378 | 15.1919559 | 15.9056047 | 15.7679074 | 19.2389567 | 0.285755032 | 3.95921635 | 0.054996219 | JEN1      |
| YKR110W   | 18.7420477 | 17.036986  | 19.3682307 | 23.0010417 | 22.8048248 | 21.3694452 | 0.2856347   | 4.35764288 | 0.017512067 | CLD1      |
| YHR183W   | 982.9382   | 777.715388 | 922.048831 | 1197.94629 | 1073.71631 | 997.068613 | 0.285122644 | 9.95421733 | 0.010783273 | GND1      |
| YBR302C   | 121.132814 | 96.0057184 | 114.090984 | 133.512474 | 133.50596  | 136.415824 | 0.285057523 | 6.93712384 | 0.002848848 | COS2      |
| YML132W   | 121.132814 | 96.0057184 | 114.090984 | 133.512474 | 133.50596  | 136.415824 | 0.285057413 | 6.93712384 | 0.002851547 | COS3      |
| YMR082C   | 0.06576157 | 0.11511477 | 0.12105144 | 0.11825728 | 0.13031328 | 0.12912051 | 0.28494703  | -2.0741953 | 1           | YMR082C   |
| YLR146W   | 5.45821038 | 2.93542664 | 4.96310911 | 4.55290543 | 6.25503766 | 5.42306161 | 0.2841135   | 2.32953725 | 0.26197782  | YJR146W   |
| YKR061W   | 44.7836298 | 46.9668263 | 47.5126908 | 57.8278119 | 55.3831459 | 56.3611046 | 0.283855816 | 5.68912509 | 0.001107054 | KTR2      |
| YDR088C   | 12.6262216 | 15.1951497 | 12.7104014 | 17.0290489 | 16.6801004 | 15.6881425 | 0.283850893 | 3.91808618 | 0.043820522 | SLU7      |
| YCL001W-B | 0.460331   | 0.05755739 | 0.12105144 | 0.23651457 | 0.06515664 | 0.4519218  | 0.283729196 | -1.5093658 | 0.845889207 | YCL001W-B |
| YKL173W   | 87.7916971 | 88.5232583 | 86.2491521 | 114.295665 | 107.964556 | 97.2923077 | 0.283667371 | 6.60202897 | 0.001159275 | SNU114    |
| YPR030W   | 21.5040337 | 23.3682984 | 22.5760939 | 25.2479301 | 29.320489  | 27.6317901 | 0.283593696 | 4.64697627 | 0.01282725  | CSR2      |
| YKL070W   | 15.2566844 | 13.9288872 | 12.2867213 | 17.0881775 | 17.6574501 | 15.6881425 | 0.28344096  | 3.94759167 | 0.045253802 | YKL070W   |
| YKL065C   | 100.089111 | 115.978131 | 97.2043076 | 112.817449 | 126.208416 | 142.290807 | 0.282931405 | 6.85643132 | 0.006221761 | YET1      |
| YER095W   | 108.243546 | 89.7319634 | 109.369977 | 133.453345 | 119.301812 | 120.856802 | 0.282361443 | 6.82787296 | 0.003554815 | RAD51     |
| YBR056W   | 79.5057392 | 104.236424 | 85.1596892 | 126.239651 | 105.488604 | 95.2909397 | 0.282095927 | 6.63622337 | 0.018704588 | YBR056W   |
| YDL072C   | 154.079361 | 125.935559 | 152.101136 | 156.336129 | 182.438598 | 186.579143 | 0.281955981 | 7.31890907 | 0.006994197 | YET3      |
| YPL148C   | 5.32668724 | 4.31680389 | 5.38678915 | 5.73547828 | 6.84144744 | 5.68130264 | 0.281726911 | 2.50031478 | 0.144889718 | PPT2      |
| YDR213W   | 49.5842244 | 51.9743188 | 50.5389769 | 58.8329988 | 61.2472437 | 64.8830585 | 0.281521137 | 5.81480246 | 0.001228291 | UPC2      |
| YJR052W   | 24.9893969 | 28.9513647 | 26.3892143 | 34.2946124 | 30.3629953 | 32.9257312 | 0.280003606 | 4.89641676 | 0.010216429 | RAD7      |
| YDL174C   | 104.166328 | 98.480686  | 95.4490617 | 124.52492  | 122.233861 | 115.046378 | 0.27981834  | 6.78262559 | 0.000802868 | DL1       |
| YGR244C   | 116.134934 | 120.870509 | 119.114619 | 148.294634 | 138.783648 | 145.260579 | 0.279768273 | 7.03925882 | 0.000555082 | LSC2      |
| YOR257W   | 15.2566844 | 16.6340843 | 17.552459  | 23.7105854 | 18.1135465 | 18.1414323 | 0.279192531 | 4.19961136 | 0.056955603 | CDC31     |
| YIL082W   | 51.6228331 | 39.599481  | 47.3916394 | 58.9512561 | 54.5361096 | 54.2951764 | 0.277122042 | 5.67723175 | 0.009484024 | YIL082W   |
| YOR259C   | 168.809952 | 162.65717  | 169.290441 | 226.285313 | 195.339614 | 185.029697 | 0.277046159 | 7.52900233 | 0.004198986 | RPT4      |
| YNL202W   | 12.3631753 | 12.259723  | 12.2867213 | 14.9595464 | 13.9435214 | 15.817263  | 0.277020575 | 3.77850498 | 0.042918275 | SPS19     |
| YGR282C   | 1373.82498 | 1062.39421 | 1383.6785  | 1420.26998 | 1548.64307 | 1656.22884 | 0.275983346 | 10.4590146 | 0.017850613 | BGL2      |
| YNL150W   | 25.4497279 | 32.9803817 | 25.1786999 | 42.276979  | 32.7086344 | 26.2114644 | 0.275528463 | 4.9522271  | 0.091475838 | YNL150W   |
| YKL150W   | 103.114143 | 126.453575 | 102.8332   | 139.543595 | 129.335935 | 133.575172 | 0.27551274  | 6.9379282  | 0.004452096 | MCR1      |
| YMR041C   | 14.3360224 | 18.8212649 | 12.4077728 | 18.6255222 | 18.2438598 | 18.3351131 | 0.275104434 | 4.08119033 | 0.084279283 | ARA2      |
| YLR213C   | 11.639798  | 8.80627993 | 8.95780668 | 10.8205415 | 12.7707019 | 11.9436476 | 0.274996621 | 3.44892516 | 0.101164384 | CRR1      |
| YLR170C   | 4.93211781 | 5.52550897 | 4.41837762 | 7.27282297 | 6.12472437 | 4.58377827 | 0.274968141 | 2.48794878 | 0.208375474 | APS1      |
| YHR219W   | 12.0343675 | 15.2527071 | 14.949853  | 18.1524931 | 15.0511844 | 17.9477515 | 0.274794141 | 3.97278492 | 0.064168121 | YHR219W   |
| YGR289C   | 19.3996634 | 15.8282809 | 17.7945619 | 21.8184689 | 21.1107521 | 21.1112041 | 0.274430916 | 4.29411486 | 0.03124239  | MAL11     |
| YBR298C   | 28.4089986 | 23.5409705 | 29.2339231 | 33.1711682 | 33.4253575 | 31.5054055 | 0.274353798 | 4.90632606 | 0.015950543 | MAL31     |
| YPL166W   | 3.55112483 | 6.10108283 | 4.96310911 | 5.49896371 | 5.34284467 | 6.90794753 | 0.273464043 | 2.46664416 | 0.225959709 | ATG29     |
| YML081C-A | 1.18370828 | 1.09359032 | 1.1499887  | 1.53734469 | 1.75922934 | 0.83928334 | 0.273348763 | 0.46852232 | 0.425221581 | ATP18     |
| YHR006W   | 40.3776045 | 45.585449  | 39.46277   | 48.3081005 | 53.1026634 | 50.2924404 | 0.273210313 | 5.53310981 | 0.004481849 | STP2      |
| YLR342W   | 2453.89302 | 1977.55664 | 2466.72575 | 2486.95068 | 2903.64061 | 2944.27053 | 0.27294881  | 11.3100018 | 0.016115282 | FKS1      |
| YER046W   | 5.91854138 | 6.84932883 | 5.74994348 | 7.86410939 | 6.7762908  | 7.74723087 | 0.272652436 | 2.79604473 | 0.12101119  | SP073     |
| YMR303C   | 22.227411  | 28.7786926 | 33.7128265 | 36.5415008 | 34.3375505 | 31.5054055 | 0.272157871 | 4.96922104 | 0.050171415 | ADH2      |
| YPL200W   | 1.38099299 | 0.92091816 | 1.1499887  | 1.35995877 | 1.17281956 | 1.61400643 | 0.27195373  | 0.4694679  | 0.408594389 | CSM4      |
| YGL029W   | 5.12940253 | 0.05803392 | 5.38678915 | 7.50933754 | 7.29754393 | 7.68267061 | 0.271090536 | 2.80311465 | 0.187023178 | CGR1      |



|           |            |            |            |            |            |            |             |            |              |           |
|-----------|------------|------------|------------|------------|------------|------------|-------------|------------|--------------|-----------|
| YKL071W   | 17.9529088 | 19.0514945 | 19.2471792 | 22.7053985 | 22.6093549 | 22.59609   | 0.270979902 | 4.37951064 | 0.018299031  | YKL071W   |
| YKL218C   | 18.7420477 | 18.3608059 | 17.3103561 | 20.4585101 | 21.9577884 | 23.2416926 | 0.270460112 | 4.33062033 | 0.02479153   | SRV1      |
| YGR137W   | 11.3767518 | 13.5259855 | 9.68411533 | 15.9056047 | 11.9888222 | 13.8158951 | 0.270318485 | 3.68406335 | 0.117577936  | YGR137W   |
| YKL174C   | 97.3271249 | 82.1343886 | 96.1753703 | 113.526993 | 106.791737 | 111.882926 | 0.269946423 | 6.66410471 | 0.002757484  | TPO5      |
| YER076W-A | 1.5782777  | 1.84183632 | 1.57366874 | 1.89211654 | 2.47595241 | 1.67856669 | 0.269687945 | 0.97246735 | 0.37434596   | YER076W-A |
| YKL093W   | 25.2524432 | 19.5119536 | 24.936597  | 30.6286366 | 25.8020303 | 27.4381093 | 0.269255005 | 4.68412245 | 0.039829481  | MBR1      |
| YAL037C-B | 808.670037 | 962.014135 | 985.600837 | 1533.26482 | 1165.8478  | 622.36088  | 0.26911102  | 9.98461126 | 0.225445929  | YAL037C-B |
| YMR240C   | 18.7420477 | 18.5910354 | 19.7919107 | 24.3018719 | 21.5668486 | 22.9188913 | 0.268692234 | 4.39974013 | 0.022699119  | CUS1      |
| YIR028W   | 8.41748107 | 8.28826346 | 8.47360091 | 9.34232544 | 9.77349634 | 11.2334848 | 0.268251121 | 3.22771237 | 0.090725794  | DAL4      |
| YIL155C   | 91.4085835 | 75.9757484 | 92.7254043 | 101.819522 | 108.876749 | 102.457128 | 0.268174102 | 6.5795986  | 0.004473719  | GUT2      |
| YPL246C   | 180.318227 | 148.210267 | 177.340362 | 182.530118 | 195.078987 | 231.513083 | 0.268047222 | 7.53854883 | 0.016208562  | RBD2      |
| YMR114C   | 10.6533745 | 9.38185378 | 10.0472697 | 13.2448158 | 12.2494487 | 10.6524424 | 0.267397412 | 3.47996757 | 0.090880358  | YMR114C   |
| YDL070W   | 212.409874 | 227.639458 | 222.250447 | 292.686778 | 265.643631 | 238.808392 | 0.267392207 | 7.92701857 | 0.006188848  | BDF2      |
| YDL020C   | 88.3177897 | 114.424082 | 94.7832788 | 123.756248 | 119.888222 | 114.594457 | 0.267317635 | 6.77388252 | 0.007749756  | RPN4      |
| YOR100C   | 1.51251613 | 1.49649201 | 1.7552459  | 1.35995877 | 1.88954263 | 2.51785003 | 0.267266081 | 0.90370469 | 0.381642924  | CRC1      |
| YLR336C   | 83.7144797 | 83.6308806 | 82.3149803 | 101.287364 | 101.448892 | 97.6796692 | 0.267049904 | 6.52034578 | 0.00083551   | SGD1      |
| YMR056C   | 19.3339018 | 12.4899526 | 15.8577388 | 20.5767674 | 19.2863661 | 17.3667092 | 0.266549706 | 4.13633035 | 0.105551006  | AAAC1     |
| YNL115C   | 79.5715007 | 74.0763547 | 81.4676202 | 90.8807228 | 91.4799257 | 100.32664  | 0.265921352 | 6.43308349 | 0.001930333  | YNL115C   |
| YEL044W   | 29.4611837 | 28.83625   | 28.9918203 | 33.8807119 | 32.5131645 | 38.5424736 | 0.265531916 | 5.00674067 | 0.0012532708 | IES6      |
| YAL039C   | 41.0352202 | 36.606497  | 39.5232957 | 52.8018773 | 43.5897937 | 44.2883365 | 0.265492873 | 5.42950474 | 0.011412381  | CYC3      |
| YKL126W   | 196.824382 | 206.458341 | 192.169164 | 242.427432 | 228.243718 | 245.070737 | 0.265415605 | 7.77249489 | 0.002620996  | YPK1      |
| YJL153C   | 16.0458233 | 13.8713298 | 15.9787903 | 18.1524931 | 17.9180766 | 19.0452759 | 0.265217776 | 4.08276747 | 0.042611548  | INO1      |
| YPL070W   | 29.8557532 | 34.3617589 | 31.7760034 | 35.8319571 | 39.4197686 | 40.2210403 | 0.264730169 | 5.14412333 | 0.010015186  | MUK1      |
| YDR367W   | 55.5027658 | 54.2766142 | 55.3810345 | 67.2883946 | 67.0461849 | 63.9146547 | 0.263693901 | 5.92324495 | 0.001586875  | KEI1      |
| YNL241C   | 336.436197 | 265.397103 | 327.020469 | 413.545722 | 365.528763 | 335.584217 | 0.263306741 | 8.41234714 | 0.020461371  | ZWF1      |
| YFL041W   | 163.154457 | 138.02261  | 160.030066 | 182.944018 | 180.288429 | 190.000837 | 0.262762177 | 7.40238079 | 0.004693563  | FET5      |
| YDR008C   | 13.1523142 | 14.5620184 | 12.5893499 | 19.4533232 | 14.1389914 | 14.7197387 | 0.262636262 | 3.89815482 | 0.105188081  | YDR008C   |
| YOL152W   | 17.3610547 | 12.0870509 | 13.5577615 | 17.679464  | 17.5922934 | 16.2046246 | 0.262485031 | 3.9861174  | 0.095464372  | FRE7      |
| YOR008C-A | 0.52609257 | 0.23022954 | 0.3026286  | 0.47302914 | 0.13031328 | 0.64560257 | 0.262122921 | -0.9825311 | 0.770080989  | YOR008C-A |
| YPL231W   | 1972.32103 | 1695.41034 | 1996.25932 | 2197.10208 | 2362.84048 | 2232.36458 | 0.262095532 | 11.0196942 | 0.008210966  | FAS2      |
| YFL023W   | 53.5956803 | 53.7010403 | 62.4020181 | 68.8848679 | 69.0660408 | 65.5286611 | 0.261796859 | 5.96151558 | 0.004125366  | BUD27     |
| YOL154W   | 10.1272819 | 9.03650947 | 10.1077954 | 12.5352721 | 11.6630309 | 10.8461232 | 0.261759375 | 3.43806684 | 0.088962992  | ZPS1      |
| YJL106W   | 11.7055596 | 13.8137724 | 13.1946071 | 13.8952309 | 15.8982207 | 16.7211066 | 0.261757825 | 3.84019873 | 0.069556032  | IME2      |
| YNL297C   | 167.626244 | 160.988006 | 165.295743 | 187.437795 | 204.591857 | 200.136798 | 0.261695857 | 7.50078569 | 0.002590073  | MON2      |
| YJL034W   | 1478.18859 | 1346.7277  | 1476.1618  | 1890.1653  | 1633.99827 | 1629.43633 | 0.260919624 | 10.6219605 | 0.008745542  | KAR2      |
| YKL146W   | 143.754794 | 131.979084 | 153.553754 | 165.619326 | 175.597151 | 173.15061  | 0.26089235  | 7.29812236 | 0.003316707  | AVT3      |
| YBR095C   | 26.3703899 | 30.1025124 | 29.1128717 | 35.4771852 | 33.4905141 | 33.635894  | 0.260786278 | 4.97698879 | 0.001903046  | RXT2      |
| YNL333W   | 8.22019636 | 9.38185378 | 9.92621821 | 12.2987575 | 9.90380962 | 10.781563  | 0.260711611 | 3.35324277 | 0.111702667  | SNZ2      |
| YER159C   | 12.8892679 | 14.044002  | 11.6209384 | 15.9056047 | 15.5724375 | 14.7197387 | 0.260492363 | 3.83277978 | 0.063850213  | BUR6      |
| YGL178W   | 122.382283 | 107.977655 | 125.711922 | 122.573675 | 145.755409 | 158.237191 | 0.260475848 | 7.02823934 | 0.012621062  | MPT5      |
| YDR183W   | 5.39244881 | 6.56154191 | 6.53677785 | 8.27800988 | 7.62332714 | 6.26234495 | 0.260260644 | 2.78855355 | 0.161858141  | PLP1      |
| YIL108W   | 120.935529 | 111.200868 | 124.985613 | 138.774923 | 147.970735 | 140.935042 | 0.260208956 | 7.0323947  | 0.002142606  | YIL108W   |
| YER142C   | 7.82562693 | 9.84231286 | 8.59465235 | 11.9439857 | 9.2522430  | 10.2650809 | 0.259860839 | 3.28679392 | 0.133838678  | MAG1      |
| YGL144C   | 45.9015765 | 45.6430064 | 42.9732618 | 55.0487657 | 52.1904705 | 53.7786943 | 0.259766157 | 5.62566763 | 0.003282607  | ROG1      |
| YDR276C   | 4.07721739 | 4.2592465  | 3.26838892 | 6.3267647  | 4.36549503 | 3.16345261 | 0.259732724 | 2.13113528 | 0.328013696  | PMP3      |
| YHL010C   | 20.3203254 | 23.4258558 | 23.847134  | 30.4512506 | 25.867187  | 24.597458  | 0.25946993  | 4.63749332 | 0.038593222  | ETP1      |
| YOL066C   | 52.5434951 | 50.5353842 | 52.3547485 | 72.5508437 | 55.0573627 | 58.2979123 | 0.259352473 | 5.83347461 | 0.015736192  | RIB2      |
| YML016C   | 159.603332 | 135.835429 | 146.411719 | 165.146297 | 178.203417 | 185.158818 | 0.258552011 | 7.33825936 | 0.005467502  | PPZ1      |
| YJR154W   | 8.3517195  | 4.83482035 | 6.4157264  | 7.92323803 | 7.49301386 | 7.94091164 | 0.258125485 | 2.86000044 | 0.213337433  | YJR154W   |
| YPL179W   | 215.763714 | 178.773238 | 213.232114 | 232.907721 | 242.708492 | 250.493798 | 0.256832622 | 7.79708145 | 0.008807404  | PPQ1      |
| YPR117W   | 141.847708 | 128.870985 | 143.748587 | 152.37451  | 173.512138 | 169.276995 | 0.256610222 | 7.2451162  | 0.004252583  | YPR117W   |
| YPL248C   | 32.486216  | 28.7211352 | 32.7444149 | 34.9450274 | 39.0939854 | 38.155112  | 0.256154734 | 5.10684207 | 0.014811503  | GAL4      |
| YHR044C   | 7.69410379 | 6.61909929 | 5.93152064 | 9.69709729 | 7.68848379 | 6.71426676 | 0.255863712 | 2.90989798 | 0.194464887  | DOG1      |
| YGR041W   | 90.6852062 | 80.2349949 | 96.5385247 | 110.334046 | 103.924844 | 104.781298 | 0.25492444  | 6.61268824 | 0.00487965   | BUD9      |
| YDR048C   | 0.92066199 | 0.74824601 | 0.96841153 | 1.06431556 | 1.10766292 | 0.96840386 | 0.254352416 | 0.11699753 | 0.473431103  | YDR048C   |
| YKL213C   | 120.869767 | 114.078737 | 110.277863 | 147.289447 | 133.245333 | 131.057322 | 0.254151102 | 6.98020036 | 0.003405893  | DOA1      |
| YIL058W   | 1.18370828 | 1.49649201 | 0.90788581 | 2.2468884  | 0.84703635 | 1.16208463 | 0.254063985 | 0.52934418 | 0.531143928  | YIL058W   |
| YOR209C   | 206.162525 | 242.834608 | 204.274308 | 272.110011 | 262.581268 | 244.166893 | 0.253542291 | 7.89978216 | 0.010219027  | NPT1      |
| YLR362W   | 35.7742946 | 37.354743  | 35.9522782 | 44.1690956 | 41.895721  | 43.9655352 | 0.253272955 | 5.32095779 | 0.006204451  | STE11     |
| YCR073C   | 72.2719664 | 65.0398452 | 73.5387508 | 79.5280235 | 87.7008405 | 84.057455  | 0.253221584 | 6.26913619 | 0.003801953  | SSK22     |
| YGL227W   | 57.3440898 | 53.9888273 | 46.7863822 | 74.324073  | 59.0319179 | 54.9407789 | 0.253092412 | 5.85465026 | 0.034267269  | VID30     |
| YMR318C   | 354.98096  | 349.833787 | 352.441272 | 464.751126 | 402.993832 | 391.945322 | 0.252857701 | 8.59352162 | 0.008033713  | ADH6      |
| YDR231C   | 16.9664853 | 17.6125599 | 17.8550876 | 21.2271825 | 21.1759087 | 20.07824   | 0.252585052 | 4.26856932 | 0.036387099  | COX20     |
| YDR350C   | 66.5507097 | 63.0253367 | 70.8756191 | 76.2168196 | 82.4883091 | 80.1192793 | 0.252577349 | 6.19614228 | 0.003310826  | ATP22     |
| YCR099C   | 3.1565554  | 3.22321357 | 4.47890334 | 4.25726222 | 4.75643489 | 3.93817569 | 0.252168485 | 2.03214156 | 0.251545511  | YCR099C   |
| YKL107W   | 5.12940253 | 3.8563448  | 5.99204636 | 6.50415062 | 5.73378452 | 5.55218212 | 0.251998892 | 2.480221   | 0.229350838  | YKL107W   |
| YIL023C   | 85.0954727 | 64.2915992 | 78.1387055 | 81.1836255 | 90.1767929 | 99.4873564 | 0.251873237 | 6.37759289 | 0.023490217  | YKE4      |
| YER133W-A | 7.75986536 | 7.19467314 | 5.81040692 | 9.87448322 | 8.14458028 | 6.6497065  | 0.251860545 | 2.94472244 | 0.21423296   | YER133W-A |
| YAL034W-A | 5.98430295 | 6.38886975 | 8.17097231 | 7.45020889 | 8.40520685 | 8.65107447 | 0.251582069 | 2.93098801 | 0.162802962  | MTW1      |
| YAR027W   | 42.4162132 | 38.1605463 | 41.7627473 | 46.5342413 | 49.5842048 | 49.4531571 | 0.251158863 | 5.48403313 | 0.007050971  | UIP3      |
| YGR295C   | 248.973307 | 195.292208 | 239.016071 | 270.631794 | 269.422716 | 272.637966 | 0.250744472 | 7.96247322 | 0.014710778  | CO56      |
| YLR104W   | 26.8307209 | 25.9583807 | 22.9997739 | 31.3973089 | 29.8417422 | 28.858435  | 0.250398928 | 4.79521518 | 0.024399418  | LCL2      |
| YJR005W   | 69.8387883 | 81.3861426 | 72.0256077 | 93.6597689 | 87.7008405 | 84.2511357 | 0.250275791 | 6.35067087 | 0.005485897  | APL1      |

|           |            |            |            |            |            |            |             |            |             |           |
|-----------|------------|------------|------------|------------|------------|------------|-------------|------------|-------------|-----------|
| YER075C   | 76.8752763 | 86.2209629 | 89.5780668 | 83.075742  | 105.55376  | 112.076607 | 0.250198496 | 6.52879803 | 0.024567036 | PTP3      |
| YGR036C   | 35.6427714 | 34.1315294 | 37.8891012 | 37.2510445 | 41.895721  | 48.936675  | 0.249822365 | 5.29985109 | 0.027947104 | CAX4      |
| YLR442C   | 47.8744236 | 49.0964495 | 48.7232052 | 58.9512561 | 56.8165921 | 57.458629  | 0.249683294 | 5.73534889 | 0.003340795 | SIR3      |
| YOR197W   | 224.246957 | 244.273543 | 228.060916 | 256.322663 | 273.723054 | 298.203828 | 0.24955285  | 7.9901107  | 0.008063903 | MCA1      |
| YGL090W   | 17.0322469 | 15.8282809 | 17.9156134 | 20.5767674 | 19.3515228 | 20.4010413 | 0.249507272 | 4.21989009 | 0.046488521 | LIF1      |
| YHR057C   | 45.9015765 | 42.3046781 | 44.0627247 | 51.9149477 | 48.9326383 | 56.2965443 | 0.249129111 | 5.5953192  | 0.007960159 | CPR2      |
| YDL011C   | 6.70768023 | 7.25223053 | 9.07885812 | 12.4761435 | 7.42785722 | 7.42442959 | 0.248342406 | 3.09479928 | 0.281722135 | YDL011C   |
| YGL126W   | 112.18924  | 94.6818986 | 116.088332 | 132.980316 | 123.080897 | 127.248267 | 0.247692544 | 6.88046052 | 0.00840052  | SCS3      |
| YER162C   | 33.2095933 | 29.296709  | 32.5628378 | 41.1535348 | 35.6406833 | 35.895503  | 0.247012018 | 5.11876547 | 0.020842595 | RAD4      |
| YLR050C   | 39.3254194 | 36.9518413 | 39.5232957 | 47.4802995 | 42.5472874 | 47.3226686 | 0.247006957 | 5.40289572 | 0.00929165  | YLR050C   |
| YDR533C   | 21.3725105 | 23.0805114 | 23.1208253 | 28.3817482 | 25.0853073 | 26.7279465 | 0.246947737 | 4.62973919 | 0.029104132 | HSP31     |
| YOR385W   | 12.2974138 | 20.6631013 | 14.4051215 | 16.9107916 | 18.3090165 | 21.1112041 | 0.2467986   | 4.12264468 | 0.174782202 | YOR385W   |
| YDL013W   | 39.3911809 | 36.4338248 | 35.2864952 | 42.2178504 | 46.261216  | 43.3199326 | 0.246595904 | 5.34307419 | 0.010877698 | SLX5      |
| YKL216W   | 93.0526228 | 116.381033 | 100.170068 | 132.211644 | 117.998679 | 117.112307 | 0.246274558 | 6.81969875 | 0.012585694 | URA1      |
| YDR509W   | 30.4476073 | 20.6631013 | 27.6602544 | 25.602702  | 34.4678638 | 33.3130927 | 0.246064642 | 4.84641588 | 0.110425127 | YDR509W   |
| YDL113C   | 35.5112483 | 35.8582509 | 37.5259469 | 46.2977267 | 40.2016483 | 42.5452095 | 0.245489643 | 5.31407818 | 0.01223678  | ATG20     |
| YMR141W-A | 0.72337728 | 1.43893463 | 0.84736009 | 0.7095437  | 1.6940727  | 1.22664489 | 0.245345223 | 0.29738241 | 0.559031388 | YMR141W-A |
| YHR176W   | 9.60118935 | 9.20918162 | 9.86569249 | 11.4709566 | 12.0539788 | 10.4587617 | 0.245307139 | 3.40066899 | 0.104075396 | FMO1      |
| YPL089C   | 67.0768023 | 70.5077968 | 76.8676654 | 68.5892247 | 91.8057089 | 93.9351743 | 0.245167506 | 6.28962082 | 0.032626697 | RLM1      |
| YBR073W   | 146.253734 | 142.742315 | 149.49853  | 167.393186 | 173.251512 | 179.090154 | 0.245150678 | 7.32025786 | 0.003487804 | RDH54     |
| YBR101C   | 67.9317027 | 67.7450423 | 63.4914811 | 95.137985  | 75.6468617 | 65.0767393 | 0.244674104 | 6.18276712 | 0.040222339 | FES1      |
| YCL012C   | 12.4946985 | 13.3533134 | 13.7998643 | 16.4377625 | 13.4874249 | 17.0439079 | 0.244336493 | 3.86426862 | 0.094780739 | YCL012C   |
| YGR126W   | 6.24734923 | 5.4103942  | 5.20521199 | 5.38070642 | 7.5581705  | 7.03706804 | 0.243081413 | 2.64217952 | 0.217002156 | YGR126W   |
| YBL033C   | 38.7335652 | 40.0023827 | 41.8837988 | 47.8350714 | 45.2187097 | 49.6468378 | 0.242250022 | 5.4596647  | 0.008799724 | RIB1      |
| YKR088C   | 86.0161347 | 79.659421  | 90.9701584 | 88.9294776 | 102.621712 | 112.076607 | 0.242237571 | 6.54652944 | 0.014599175 | TVP38     |
| YKL006C   | 7.75986536 | 5.58306636 | 6.17362352 | 9.63796865 | 8.27489357 | 5.10026032 | 0.242127437 | 2.84989515 | 0.322220362 | SHU1      |
| YDL044C   | 14.5990687 | 12.3748378 | 13.2551329 | 16.4968911 | 15.6375941 | 15.3653412 | 0.241918312 | 3.88111589 | 0.079088467 | MTF2      |
| YHR071W   | 39.1281347 | 47.369728  | 40.9153873 | 48.7811297 | 51.0176509 | 51.0026032 | 0.241649719 | 5.53899016 | 0.013981779 | PCL5      |
| YGR067C   | 6.51039552 | 5.35283682 | 5.99204636 | 6.68153655 | 7.16723065 | 7.23074881 | 0.241173215 | 2.72229727 | 0.16183513  | YGR067C   |
| YOL043C   | 13.8099299 | 16.5189695 | 12.9525043 | 17.9751072 | 16.5497871 | 16.6565464 | 0.240875082 | 3.98868591 | 0.089677545 | NTG2      |
| YBR296C   | 19.7942328 | 16.4614122 | 19.8524364 | 21.8775975 | 21.7623185 | 22.59609   | 0.240749635 | 4.35742796 | 0.05390879  | PHO89     |
| YNL283C   | 135.271551 | 110.797966 | 132.853957 | 140.134882 | 151.098253 | 156.364943 | 0.240537179 | 7.10693811 | 0.012735613 | WSC2      |
| YKR101W   | 14.7963534 | 16.4038548 | 15.1919559 | 21.1680538 | 17.5271368 | 16.0755041 | 0.240198845 | 4.08725693 | 0.096841713 | SIR1      |
| YHR033W   | 37.1552875 | 29.2391517 | 34.4996609 | 37.664945  | 43.3291671 | 38.0905518 | 0.240078103 | 5.20000984 | 0.03549799  | YHR033W   |
| YOL089C   | 59.3169369 | 62.5648776 | 57.3783833 | 72.4325865 | 70.2388604 | 69.014915  | 0.239765157 | 6.02856676 | 0.004528045 | HAL9      |
| YOL159C-A | 0.72337728 | 1.09359032 | 1.08946297 | 1.18257284 | 1.62891606 | 0.64560257 | 0.239696442 | 0.24732308 | 0.533008829 | YOL159C-A |
| YKR069W   | 28.8693296 | 24.5770035 | 22.8181967 | 31.0425371 | 29.9720554 | 28.9229953 | 0.239671289 | 4.79746669 | 0.042593073 | MET1      |
| YML012C-A | 3.48536326 | 2.7051971  | 3.02628604 | 6.09025013 | 2.9320489  | 1.8076872  | 0.239443557 | 1.8000306  | 0.518852631 | YML012C-A |
| YPR075C   | 96.537986  | 80.407667  | 91.6359413 | 113.704379 | 103.208121 | 99.874718  | 0.239038988 | 6.60989675 | 0.01144023  | OPY2      |
| YCR001W   | 0.39456943 | 0.4029017  | 0.42368005 | 0.41390049 | 0.4560965  | 0.58104232 | 0.238992125 | -0.8161012 | 0.781103078 | YCR001W   |
| YIL122W   | 10.2588051 | 12.0294935 | 13.0735557 | 12.1805003 | 14.3344613 | 15.300781  | 0.23864964  | 3.69823235 | 0.126541584 | POG1      |
| YLR267W   | 14.9278766 | 14.6771332 | 14.949853  | 16.7925343 | 16.8104137 | 18.9807156 | 0.238601803 | 4.02713456 | 0.068355133 | BOP2      |
| YML008C   | 288.759058 | 295.84496  | 278.841996 | 358.851728 | 332.168562 | 327.643306 | 0.238554393 | 8.29374141 | 0.007583966 | ERG6      |
| YHR160C   | 8.28595793 | 8.518493   | 8.29202375 | 9.63796865 | 9.63796865 | 9.3612373  | 0.238007845 | 3.20750369 | 0.128976598 | PEX18     |
| YPL015C   | 106.994076 | 80.5803392 | 102.227942 | 113.586121 | 113.698341 | 114.271655 | 0.237715788 | 6.71867532 | 0.021196675 | HST2      |
| YOR138C   | 83.8460029 | 77.4722404 | 80.9834144 | 99.6908904 | 93.9558781 | 91.8692461 | 0.237397284 | 6.4608309  | 0.004456598 | RUP1      |
| YGL192W   | 86.2134194 | 75.169945  | 90.7280555 | 89.6390213 | 100.732169 | 106.782666 | 0.23712553  | 6.51792107 | 0.016009276 | IME4      |
| YIL042C   | 41.2982665 | 33.0379391 | 38.1917298 | 46.5933699 | 42.7427573 | 43.1262519 | 0.237085758 | 5.35544272 | 0.025763724 | PKP1      |
| YGR269W   | 0.59185414 | 0.92091816 | 1.02893725 | 0.88692963 | 0.78187971 | 1.3557654  | 0.23616807  | 0.07449178 | 0.053760822 | YGR269W   |
| YBR290W   | 24.6605891 | 25.8432659 | 28.3260373 | 27.3174326 | 30.3293086 | 35.12078   | 0.235954231 | 4.84482343 | 0.051740833 | BSD2      |
| YLR055C   | 87.1340814 | 72.4647479 | 78.5018599 | 97.1483588 | 89.06913   | 93.9997346 | 0.235941473 | 6.43452385 | 0.009808368 | SPT8      |
| YJL082W   | 78.2562693 | 72.176961  | 75.9597796 | 90.9989801 | 86.7886475 | 88.7057935 | 0.235838614 | 6.36213814 | 0.00398785  | IML2      |
| YMR169C   | 27.1595288 | 27.2822006 | 26.87342   | 34.8267701 | 29.9068988 | 30.859803  | 0.234327035 | 4.88809895 | 0.028954874 | ALD3      |
| YML057W   | 132.312281 | 119.028672 | 131.219763 | 148.235506 | 156.506255 | 145.196019 | 0.234249651 | 7.11744924 | 0.006287123 | CMP2      |
| YNL295W   | 33.3411164 | 31.8867914 | 32.5628378 | 37.7240736 | 35.4452134 | 41.8350467 | 0.234150843 | 5.15295395 | 0.021998113 | YNL295W   |
| YER069W   | 104.692421 | 95.3150298 | 98.0516677 | 125.234464 | 114.936317 | 110.204359 | 0.233950182 | 6.75741764 | 0.007117832 | ARG5.6    |
| YDR384C   | 77.0067995 | 62.5073203 | 76.3229339 | 80.8879823 | 87.0492741 | 85.8005819 | 0.233911374 | 6.2920442  | 0.015054429 | ATO3      |
| YJR021C   | 12.4946985 | 10.8207884 | 11.1367326 | 16.674277  | 12.8358585 | 10.9106835 | 0.233665178 | 3.65631294 | 0.191911184 | REC107    |
| YJL101C   | 95.2227546 | 90.710439  | 94.3595987 | 102.056036 | 113.633184 | 113.884294 | 0.233481928 | 6.66886162 | 0.005557113 | GSH1      |
| YIL025C   | 0.59185414 | 0.23022954 | 0.22368005 | 0.47302914 | 0.4560965  | 0.51648206 | 0.233206439 | -0.8155449 | 0.782848369 | YIL025C   |
| YPR013C   | 24.7263506 | 24.5770035 | 22.5760939 | 25.8392166 | 28.9947058 | 29.6977183 | 0.233133264 | 4.71018979 | 0.03919506  | CMR3      |
| YGR259C   | 51.5570716 | 41.7866616 | 45.2127134 | 66.0466931 | 55.1225194 | 51.5122454 | 0.232886798 | 5.65337649 | 0.104346546 | YGR259C   |
| YHR199C   | 76.5464685 | 69.8171082 | 72.9940193 | 83.0166134 | 85.6158279 | 89.093155  | 0.232816603 | 6.31505062 | 0.005229801 | AIM46     |
| YNL139C   | 119.620297 | 106.596277 | 119.296196 | 131.442971 | 136.503166 | 137.96527  | 0.232638704 | 6.96972665 | 0.006298111 | THO2      |
| YHR173C   | 3.22231697 | 2.93542664 | 1.69472018 | 3.54771852 | 2.86689226 | 2.77609106 | 0.23217309  | 1.5673085  | 0.401796383 | YHR173C   |
| YJR085C   | 43.9944909 | 38.563448  | 41.7627473 | 61.8485595 | 44.1762035 | 39.8336787 | 0.231978195 | 5.497213   | 0.099478024 | YJR085C   |
| YBR114W   | 88.2520281 | 77.414683  | 87.7017694 | 104.184667 | 91.610239  | 101.617845 | 0.231936764 | 6.52216642 | 0.010798368 | RAD16     |
| YKR012C   | 18.4132398 | 20.3753143 | 18.8234992 | 17.4429494 | 24.1731143 | 26.1469042 | 0.231763109 | 4.39217473 | 0.126185342 | YKR012C   |
| YHR202W   | 30.0530379 | 22.9078393 | 27.4786772 | 31.1607943 | 32.2525379 | 30.9243632 | 0.231640035 | 4.86934357 | 0.051950531 | YHR202W   |
| YDR244W   | 29.5269453 | 31.6565618 | 32.1391577 | 34.8858988 | 36.618033  | 38.155112  | 0.231548288 | 5.0852394  | 0.021089925 | PEX5      |
| YDR032C   | 282.511708 | 236.503296 | 254.87381  | 366.242809 | 285.516406 | 256.497902 | 0.231256083 | 8.13178087 | 0.065250186 | PST2      |
| YBR232C   | 3.87993268 | 6.04352544 | 3.57101753 | 5.38070642 | 5.79894116 | 4.71289878 | 0.230957079 | 2.33108372 | 0.329104754 | YBR232C   |
| YOL162W   | 1.18370828 | 0.80580339 | 1.39209158 | 1.35995877 | 0.97734963 | 1.61400643 | 0.230778049 | 0.42530388 | 0.502429142 | YOL162W   |

|           |            |            |            |            |            |            |             |            |             |           |
|-----------|------------|------------|------------|------------|------------|------------|-------------|------------|-------------|-----------|
| YOL163W   | 1.51251613 | 0.80580339 | 1.4526173  | 1.53734469 | 1.30313285 | 1.54944617 | 0.230776289 | 0.56337841 | 0.529239003 | YOL163W   |
| YBR244W   | 17.2952931 | 29.4693812 | 17.0077275 | 28.4408768 | 25.6717171 | 20.7884028 | 0.230765384 | 4.54059887 | 0.239428932 | GPX2      |
| YGR131W   | 3.1565554  | 4.48947604 | 2.78418316 | 3.54771852 | 4.1700251  | 4.58377827 | 0.230647954 | 1.96822548 | 0.327143195 | FHN1      |
| YPL240C   | 445.994974 | 389.203038 | 382.946235 | 598.500114 | 459.028545 | 371.544281 | 0.230540325 | 8.78573978 | 0.105636887 | HSP82     |
| YOR355W   | 207.411995 | 195.292208 | 213.29264  | 229.005231 | 239.25519  | 254.431974 | 0.230439488 | 7.80232918 | 0.010886217 | GDS1      |
| YNL157W   | 31.4997924 | 40.5779565 | 32.1391577 | 42.454365  | 38.1817924 | 41.7059262 | 0.230199312 | 5.24403179 | 0.045999051 | IGO1      |
| YMR269W   | 9.66695092 | 10.763231  | 10.3498983 | 15.4325756 | 11.5978823 | 9.03843602 | 0.230172754 | 3.49650107 | 0.241582172 | TMA23     |
| YIR014W   | 11.1137055 | 8.86383731 | 9.56306389 | 12.062243  | 11.1417858 | 11.3626053 | 0.229859459 | 3.43247224 | 0.148669375 | YIR014W   |
| YPL229W   | 23.0823114 | 16.4614122 | 22.2129395 | 20.7541533 | 26.58391   | 25.0493798 | 0.229798735 | 4.4882213  | 0.127622363 | YPL229W   |
| YPR152C   | 20.4518485 | 18.8788223 | 23.1208253 | 23.1784277 | 24.1731143 | 25.8886632 | 0.229719405 | 4.50624637 | 0.061448376 | URN1      |
| YOR204W   | 570.415866 | 478.186756 | 570.454918 | 588.980403 | 638.665407 | 670.393711 | 0.229389534 | 9.19544    | 0.024900535 | DED1      |
| YOR303W   | 170.453992 | 135.662757 | 190.958649 | 160.297748 | 194.62289  | 227.768588 | 0.229225446 | 7.49219758 | 0.095643188 | CPA1      |
| YCR061W   | 64.2490547 | 49.3266791 | 60.2836179 | 70.1265694 | 68.5447877 | 64.8184983 | 0.22826136  | 5.9771452  | 0.027621322 | YCR061W   |
| YOR027W   | 449.940668 | 426.672896 | 424.164251 | 550.073757 | 511.609955 | 461.6704   | 0.227977752 | 8.87899993 | 0.017720926 | STI1      |
| YLR369W   | 48.5320393 | 48.5784331 | 50.1758225 | 59.5425425 | 57.012062  | 55.9091828 | 0.227906764 | 5.73911151 | 0.008177082 | SSQ1      |
| YPL206C   | 133.035658 | 100.264965 | 120.143556 | 151.487581 | 135.265189 | 126.860906 | 0.227542788 | 6.99943926 | 0.037539573 | PGC1      |
| YHR007C-A | 0.19728471 | 0.51801647 | 0.54473149 | 0.82780099 | 0.32578321 | 0.32280129 | 0.227111164 | -0.7662697 | 0.693315622 | YHR007C-A |
| YIR009W   | 2.10437027 | 1.84183632 | 3.44996609 | 3.07468938 | 2.21532584 | 3.35713338 | 0.22637668  | 1.4844921  | 0.450707873 | MSL1      |
| YML087C   | 12.0343675 | 11.2812475 | 12.8919785 | 15.9647333 | 13.4874249 | 12.8474912 | 0.2263116   | 3.7237286  | 0.13586932  | AIM33     |
| YNL103W   | 97.2613633 | 94.2214395 | 100.654274 | 99.9865336 | 120.604945 | 121.050482 | 0.225420657 | 6.72423553 | 0.015874998 | MET4      |
| YDL081C   | 473.220264 | 377.576447 | 403.767083 | 657.392242 | 440.002805 | 369.155551 | 0.225386544 | 8.82546539 | 0.179585914 | RPP1A     |
| YDR396W   | 14.4675456 | 13.8137724 | 14.8288016 | 17.8568499 | 17.0058836 | 15.4944617 | 0.225253504 | 3.97264022 | 0.092046993 | YDR396W   |
| YAL064C-A | 1.1179467  | 1.49649201 | 1.33156586 | 1.95124519 | 1.88954263 | 0.77472309 | 0.225110348 | 0.6394239  | 0.535586101 | TDA8      |
| YGR115C   | 9.27238149 | 7.3673453  | 5.62889203 | 11.3526993 | 8.40520685 | 6.1977847  | 0.225036379 | 3.02927044 | 0.36946626  | YGR115C   |
| YLO20W    | 232.269866 | 187.521961 | 230.663522 | 250.587185 | 244.923818 | 264.632495 | 0.225033444 | 7.87774555 | 0.027405806 | TAT2      |
| YPL110C   | 60.0403142 | 53.8161551 | 54.8968288 | 65.1006349 | 66.0036786 | 66.0451432 | 0.22503017  | 5.93288859 | 0.009116097 | GDE1      |
| YMR192W   | 40.0487967 | 43.5133832 | 44.4864048 | 52.9792632 | 47.6946621 | 49.0012353 | 0.225005533 | 5.53659615 | 0.016369349 | GYL1      |
| YIL067C   | 71.7458738 | 62.622435  | 70.3308876 | 79.4688949 | 75.0604519 | 84.573937  | 0.224739393 | 6.21091221 | 0.012826799 | YIL067C   |
| YHR043C   | 24.3975428 | 36.0309231 | 22.8787225 | 38.5518746 | 29.4508023 | 29.3749171 | 0.224588461 | 4.92002522 | 0.179795802 | DOG2      |
| YDL233W   | 29.1323759 | 29.4118238 | 31.2312719 | 34.1763551 | 34.9891169 | 35.7663825 | 0.224567607 | 5.02536229 | 0.02362744  | MGF1      |
| YNL227C   | 24.3317812 | 28.2606761 | 30.141809  | 34.2354837 | 33.1647309 | 29.3103568 | 0.224431863 | 4.90886739 | 0.055129661 | JJJ1      |
| YPL077C   | 3.55112483 | 4.48947604 | 4.72100622 | 5.02593457 | 5.34284467 | 4.58377827 | 0.22427067  | 2.24705022 | 0.26370991  | YPL077C   |
| YAR023C   | 3.22231697 | 3.33832834 | 3.08681176 | 3.13381803 | 3.58361532 | 4.58377827 | 0.223973035 | 1.85088644 | 0.315664628 | YAR023C   |
| YLL022C   | 47.6771389 | 47.0243837 | 48.4205766 | 61.0798872 | 53.6890732 | 52.2292481 | 0.223380228 | 5.6952613  | 0.017486439 | HIF1      |
| YFL052W   | 3.41960169 | 2.76275449 | 1.7552459  | 3.07468938 | 3.51845868 | 2.64697055 | 0.22308689  | 1.57394262 | 0.429625939 | YFL052W   |
| YOL059W   | 169.664853 | 146.656217 | 173.164087 | 183.417048 | 195.535083 | 192.325006 | 0.223065852 | 7.46675399 | 0.017455743 | GPD2      |
| YNL250W   | 36.629195  | 36.0309231 | 34.0154551 | 42.276979  | 42.866608  | 39.898239  | 0.22284004  | 5.27201855 | 0.018405714 | RAD50     |
| YDR482C   | 8.02291165 | 8.1155913  | 7.32361222 | 8.45539581 | 10.4902194 | 8.4573937  | 0.222495572 | 3.10286301 | 0.186459001 | CWC21     |
| YML047W-A | 0.19728471 | 0.17267216 | 0.06052572 | 0.11825728 | 0.13031328 | 0.25824103 | 0.222298742 | -1.8425858 | 1           | YML047W-A |
| YBR033W   | 30.184561  | 27.6851023 | 32.1391577 | 30.2738647 | 34.4027071 | 40.3501608 | 0.222013083 | 5.02705786 | 0.07041939  | EDS1      |
| YBR214W   | 87.8574587 | 76.4362075 | 87.6412437 | 87.214747  | 101.123109 | 105.49146  | 0.221886324 | 6.50866807 | 0.022467288 | SDS24     |
| YFR022W   | 43.5999215 | 36.4913822 | 42.6706332 | 44.8195106 | 51.0828075 | 47.1935481 | 0.221597592 | 5.4727631  | 0.031673433 | ROG3      |
| YNL254C   | 25.7127742 | 25.0374625 | 25.2997513 | 31.219923  | 28.603766  | 28.7938747 | 0.221521932 | 4.78483245 | 0.037038814 | RTC4      |
| YCR032W   | 91.2770604 | 98.1353417 | 97.9306162 | 106.66807  | 118.650246 | 109.816998 | 0.221403805 | 6.69853148 | 0.008631963 | BPH1      |
| YAL040C   | 164.075119 | 136.123216 | 162.632612 | 158.93779  | 188.889106 | 191.679404 | 0.221187552 | 7.38495876 | 0.035332519 | CLN3      |
| YBR152W   | 11.9686059 | 11.2812475 | 10.5314754 | 13.7178449 | 13.291955  | 12.3310091 | 0.221181041 | 3.62123949 | 0.12677087  | SPP381    |
| YOR353C   | 45.9015765 | 50.9958432 | 49.1468853 | 51.855819  | 57.0772186 | 61.4613649 | 0.221176357 | 5.72395804 | 0.02113833  | SOQ2      |
| YJL078C   | 273.831181 | 222.459294 | 270.00524  | 272.464782 | 302.066194 | 318.60487  | 0.221055696 | 8.11198642 | 0.03630651  | PRY3      |
| YBR210W   | 14.401784  | 15.0224775 | 14.4051215 | 17.5612067 | 16.028534  | 17.4958297 | 0.220977549 | 3.9948318  | 0.088861215 | ERV15     |
| YHR200W   | 155.32883  | 143.433004 | 137.574963 | 196.957507 | 163.021919 | 148.294911 | 0.220622583 | 7.29979052 | 0.040276215 | RPN10     |
| YJL127C-B | 0.26304628 | 0.05755739 | 0.12105144 | 0.05912864 | 0.13031328 | 0.32280129 | 0.220575444 | -1.8420818 | 1           | YJL127C-B |
| YAL049C   | 59.3169369 | 61.4712873 | 53.2626343 | 73.7334166 | 64.3747626 | 64.5602573 | 0.220090296 | 5.97533067 | 0.02068038  | AIM2      |
| YBL093C   | 28.0144292 | 32.6925948 | 33.9549294 | 33.52594   | 40.2016483 | 36.6702261 | 0.21993278  | 5.09992348 | 0.053500702 | ROX3      |
| YKR019C   | 18.4132398 | 15.7131661 | 17.9156134 | 18.5072649 | 20.6546556 | 21.4340054 | 0.219857624 | 4.23843536 | 0.094578464 | IRS4      |
| YPL232W   | 79.4399776 | 75.4577319 | 74.2045337 | 93.8962835 | 89.3297565 | 83.4764126 | 0.21983595  | 6.37073209 | 0.009600554 | SSO1      |
| YDR155C   | 1262.22759 | 974.216301 | 1151.13868 | 1238.86331 | 1271.14093 | 1433.17315 | 0.219137481 | 10.2548898 | 0.050683915 | CPR1      |
| YLR263W   | 18.084432  | 19.3968388 | 19.1866535 | 19.9263524 | 23.8473311 | 22.2732888 | 0.219011584 | 4.36215556 | 0.074496777 | RED1      |
| YBL054W   | 54.713627  | 70.8531411 | 73.054545  | 63.4450329 | 82.0322126 | 85.8651422 | 0.218765103 | 6.16543689 | 0.086526314 | TOD6      |
| YKL187C   | 25.1866816 | 20.8933308 | 25.1786999 | 25.3070588 | 26.6490667 | 30.9243632 | 0.218407421 | 4.68873642 | 0.083919301 | FAT3      |
| YDL059C   | 6.18158766 | 5.69818113 | 5.32626343 | 7.50933754 | 6.45050758 | 6.00410393 | 0.218007708 | 2.65967911 | 0.235838531 | RAD59     |
| YBR054W   | 64.8409089 | 46.621482  | 50.1152968 | 58.4190983 | 61.377557  | 67.9819509 | 0.217783278 | 5.86568885 | 0.068511611 | YRO2      |
| YPL216W   | 43.0738289 | 39.8872679 | 41.4601187 | 43.5186805 | 49.3235782 | 51.8418866 | 0.217358471 | 5.49032134 | 0.026928993 | YPL216W   |
| YLR419W   | 90.4221599 | 81.7890443 | 84.4939062 | 99.6908904 | 98.6471564 | 100.003839 | 0.217341903 | 6.53320617 | 0.008460112 | YLR419W   |
| YOL048C   | 30.3818457 | 36.2611526 | 34.0759808 | 36.1867289 | 40.2668049 | 40.8020826 | 0.217334073 | 5.18785946 | 0.039576389 | RRT8      |
| YGR124W   | 1089.53771 | 896.801618 | 1025.54781 | 1244.71704 | 1162.19903 | 1094.49004 | 0.217332492 | 10.084354  | 0.035101443 | ASN2      |
| YBL055C   | 43.0738289 | 45.585449  | 42.6101074 | 50.2593457 | 49.714518  | 52.6811699 | 0.217224513 | 5.56803835 | 0.014621185 | YBL055C   |
| YLO18C    | 22.7535035 | 22.6200524 | 24.6339684 | 25.0705442 | 29.1901757 | 27.1798683 | 0.217203188 | 4.66401221 | 0.057604542 | TLG2      |
| YDR338C   | 54.713627  | 47.6575149 | 54.1099944 | 59.2468993 | 61.1820871 | 61.3322444 | 0.21665073  | 5.81965152 | 0.016741483 | YDR338C   |
| YLR315W   | 5.91854138 | 5.35283682 | 5.14468627 | 7.15456568 | 6.12472437 | 5.7458629  | 0.216646566 | 2.59222061 | 0.240872625 | NKP2      |
| YML054C   | 25.4497279 | 24.7496756 | 22.9997739 | 29.2095492 | 27.691573  | 28.0837119 | 0.216106051 | 4.7269553  | 0.046249804 | CYB2      |
| YPL181W   | 56.3576662 | 51.0534006 | 58.104692  | 69.535283  | 62.6155332 | 59.976479  | 0.216090499 | 5.90033303 | 0.022386528 | CTI6      |
| YIL077C   | 27.4225751 | 32.7501521 | 29.052346  | 35.8910857 | 34.2723938 | 33.5067735 | 0.215430328 | 5.01264788 | 0.044083934 | YIL077C   |
| YGL130W   | 50.570648  | 57.8451721 | 48.4811024 | 67.9388097 | 56.8165921 | 57.3940687 | 0.215408796 | 5.82392024 | 0.038038838 | CEG1      |

|           |            |            |            |            |            |            |             |            |             |           |
|-----------|------------|------------|------------|------------|------------|------------|-------------|------------|-------------|-----------|
| YDR387C   | 56.4891894 | 46.9092689 | 59.0731035 | 61.7303023 | 62.8110031 | 63.9146547 | 0.214692258 | 5.87263746 | 0.030262351 | YDR387C   |
| YER028C   | 18.9393324 | 17.0945434 | 20.2155907 | 20.2811242 | 20.6546556 | 24.339217  | 0.214640359 | 4.34782382 | 0.098986322 | MIG3      |
| YLR031W   | 8.22019636 | 7.54001745 | 7.50518938 | 8.69191038 | 8.86130335 | 9.42579756 | 0.21425897  | 3.08540984 | 0.174205595 | YLR031W   |
| YPL209C   | 7.16801122 | 8.40337823 | 7.98939514 | 10.4657696 | 8.47036349 | 8.39283344 | 0.21418177  | 3.1073666  | 0.208703621 | IPL1      |
| YFR042W   | 24.3317812 | 20.2026422 | 23.4839797 | 23.2375563 | 28.7340792 | 26.9216273 | 0.214081147 | 4.619469   | 0.09208431  | KEG1      |
| YBR023C   | 343.669969 | 283.124778 | 347.478163 | 376.590321 | 379.602598 | 373.739329 | 0.213974505 | 8.45452051 | 0.031941798 | CHS3      |
| YCR010C   | 3.35384011 | 2.99298403 | 2.36050311 | 2.77904617 | 3.64877197 | 3.67993466 | 0.213659135 | 1.6991992  | 0.370677033 | ADY2      |
| YMR026C   | 25.5812511 | 33.2106112 | 25.6629056 | 32.9346536 | 31.6009715 | 33.5067735 | 0.213641929 | 4.93313304 | 0.077804843 | PEX12     |
| YGR057C   | 10.9164208 | 16.5189695 | 9.80516677 | 15.7282188 | 14.8557144 | 12.6538104 | 0.213624678 | 3.76116269 | 0.278596377 | LST7      |
| YLR187W   | 48.6635624 | 50.9958432 | 55.502086  | 52.9201346 | 64.3747626 | 62.6880098 | 0.212961744 | 5.80646275 | 0.034163215 | SKG3      |
| YOL106W   | 4.14297896 | 2.82031187 | 3.08681176 | 4.25726222 | 3.06236219 | 4.26097698 | 0.212304966 | 1.89566633 | 0.3951856   | YOL106W   |
| YPR121W   | 35.1166788 | 30.7932011 | 35.5285981 | 38.8475178 | 38.246949  | 40.3501608 | 0.212193333 | 5.1933753  | 0.034995474 | THI22     |
| YBL040C   | 111.400101 | 98.4231286 | 109.733132 | 121.864131 | 121.321668 | 126.860906 | 0.211982926 | 6.84600116 | 0.012740621 | ERD2      |
| YDR282C   | 13.3495989 | 18.3608059 | 15.5551102 | 20.2219956 | 17.85292   | 16.7211066 | 0.211798035 | 4.1005771  | 0.158485539 | YDR282C   |
| YGL027C   | 265.216415 | 216.185539 | 241.01342  | 303.743834 | 276.394476 | 256.304221 | 0.211753887 | 8.02192899 | 0.042086967 | CWH41     |
| YJL196C   | 258.640258 | 216.300653 | 249.971227 | 261.999013 | 270.530379 | 306.661222 | 0.211291006 | 8.02668978 | 0.039069248 | ELO1      |
| YML102W   | 62.8023002 | 57.7876147 | 66.5782929 | 77.0446205 | 69.4569807 | 70.0478791 | 0.211110547 | 6.07481916 | 0.020304181 | CAC2      |
| YHR070C-A | 8.48324264 | 9.6696407  | 9.19990956 | 13.7769736 | 9.57802641 | 8.26371293 | 0.210733312 | 3.31840921 | 0.30013928  | YHR070C-A |
| YJR097W   | 4.34026368 | 5.52550897 | 4.29732618 | 6.03112149 | 5.52484467 | 5.03570007 | 0.210628801 | 2.38641362 | 0.294170689 | JJ3       |
| YJL060W   | 124.618177 | 106.193376 | 121.233019 | 141.908741 | 130.117815 | 135.189179 | 0.210615336 | 6.9847558  | 0.019310213 | BN3       |
| YKL134C   | 35.1166788 | 42.0168912 | 39.7048728 | 43.8143237 | 46.3915293 | 45.1276198 | 0.210428083 | 5.3976328  | 0.034333417 | OCT1      |
| YOR117W   | 183.014452 | 208.357734 | 195.074398 | 256.559178 | 217.818655 | 204.010413 | 0.210143251 | 7.72074823 | 0.043351492 | RPT5      |
| YDR080W   | 58.7250828 | 64.8671731 | 58.5888977 | 72.2552005 | 70.6298002 | 67.9173906 | 0.210139748 | 6.03614882 | 0.015058795 | VPS41     |
| YML028W   | 1809.10081 | 1472.08768 | 1505.03257 | 2058.03151 | 1783.14183 | 1694.90043 | 0.210024516 | 10.7486078 | 0.061873421 | TSW1      |
| YKL046C   | 225.496427 | 205.997881 | 217.589966 | 278.200261 | 236.974708 | 235.451258 | 0.209981761 | 7.86671407 | 0.030905705 | CDW1      |
| YML053W   | 52.1489257 | 57.3271556 | 56.8336518 | 54.8713798 | 65.1566423 | 72.4366086 | 0.209515963 | 5.90458012 | 0.04842966  | MSG5      |
| YPL170W   | 14.0729762 | 14.7346906 | 13.7998643 | 15.2551896 | 17.0710403 | 16.9793477 | 0.209127809 | 3.94799798 | 0.118158542 | DAP1      |
| YAL005C   | 2485.85314 | 2292.45309 | 2317.71143 | 2999.30037 | 2676.96065 | 2526.04919 | 0.209043749 | 11.3161922 | 0.035108299 | SSA1      |
| YNL082W   | 38.7993268 | 36.2611526 | 40.31013   | 47.243785  | 44.5671433 | 41.4476852 | 0.208857455 | 5.37707579 | 0.033477794 | PMS1      |
| YBR150C   | 43.3368752 | 42.5349076 | 40.5522329 | 49.4315447 | 47.5643489 | 49.0657955 | 0.208678463 | 5.50879402 | 0.018994603 | TBS1      |
| YNL235C   | 4.60330996 | 5.64062374 | 7.08150933 | 8.21888124 | 5.01706145 | 6.77882701 | 0.20854251  | 2.67040895 | 0.367332189 | YNL235C   |
| YIR016W   | 44.0602525 | 41.9593338 | 40.1285529 | 54.1618361 | 48.4765418 | 42.9971313 | 0.208395373 | 5.50533684 | 0.045776302 | YIR016W   |
| YOL017W   | 28.343237  | 25.8432659 | 26.7523686 | 33.4668114 | 30.5584652 | 29.3749171 | 0.2081545   | 4.86670316 | 0.054437354 | ESC8      |
| YFL041W-A | 0.06576157 | 0.23022954 | 0.18157716 | 0.05912864 | 0.13031328 | 0.38736154 | 0.207998173 | -1.7396858 | 1           | YFL041W-A |
| YGL149W   | 1.77556241 | 1.43893463 | 1.57366874 | 2.12863111 | 2.21532584 | 1.16208463 | 0.207867739 | 0.87829172 | 0.519200879 | YGL149W   |
| YJR128W   | 1.05218513 | 1.66916417 | 1.93682307 | 2.83817482 | 1.49860277 | 1.03296412 | 0.207728684 | 0.85846941 | 0.588164961 | YJR128W   |
| YKR104W   | 9.60118935 | 8.69116516 | 9.38148672 | 10.4657696 | 10.2295928 | 11.2334848 | 0.20719736  | 3.32888342 | 0.071429239 | YKR104W   |
| YER062C   | 108.638115 | 117.704853 | 105.859486 | 140.134882 | 117.868366 | 125.37602  | 0.206849512 | 6.89963215 | 0.023984081 | GPP2      |
| YMR062C   | 74.6393829 | 80.407667  | 69.9677332 | 92.2406815 | 81.4458028 | 85.9942627 | 0.206814786 | 6.3382807  | 0.020987401 | ARG7      |
| YOR120W   | 19.005094  | 20.4904291 | 18.5813963 | 21.2271825 | 23.3912346 | 22.4669695 | 0.206619562 | 4.39077992 | 0.079703078 | GCY1      |
| YBR227C   | 40.4433661 | 41.6715468 | 44.9100848 | 56.5861104 | 48.1507586 | 41.7704864 | 0.206535799 | 5.51494438 | 0.070159692 | MCX1      |
| YER101C   | 17.624101  | 21.1235603 | 18.3392934 | 23.6514568 | 19.6121493 | 22.59609   | 0.205582994 | 4.36649876 | 0.11440594  | AST2      |
| YDL007W   | 167.823529 | 163.175187 | 173.164087 | 212.508339 | 187.06472  | 181.672564 | 0.205506593 | 7.50007236 | 0.02675428  | RPT2      |
| YBR207W   | 119.817582 | 106.999179 | 137.393386 | 135.463719 | 136.959262 | 147.455628 | 0.205269862 | 7.03110299 | 0.03809194  | FTH1      |
| YOR256C   | 99.760303  | 101.819014 | 94.9043302 | 122.751061 | 110.701135 | 108.267551 | 0.205160857 | 6.73462975 | 0.016982359 | TRE2      |
| YOR336W   | 176.635579 | 147.289349 | 158.758966 | 175.375552 | 189.019419 | 191.808524 | 0.204752712 | 7.43665881 | 0.031195871 | KRE5      |
| YPL192C   | 5.85277981 | 5.35283682 | 4.53942906 | 7.50933754 | 5.92925445 | 4.64833852 | 0.204490662 | 2.52801342 | 0.363237608 | PRM3      |
| YKL162C   | 6.90496494 | 10.4754441 | 8.83675524 | 10.1109978 | 10.8811593 | 9.29667705 | 0.204226566 | 3.25624477 | 0.264756288 | YKL162C   |
| YLR358C   | 11.5740365 | 7.65513222 | 11.6814641 | 16.3195052 | 9.51286977 | 9.68403859 | 0.204075527 | 3.48580557 | 0.399044121 | YLR358C   |
| YBR096W   | 107.783215 | 90.9982259 | 109.672606 | 106.431556 | 124.253717 | 124.601297 | 0.203969701 | 6.79073557 | 0.040200663 | YBR096W   |
| YKL175W   | 183.277498 | 146.023086 | 178.006145 | 192.581987 | 194.62289  | 196.973345 | 0.203855195 | 7.50790317 | 0.041363215 | ZRT3      |
| YDL206W   | 49.3869397 | 41.844219  | 44.9100848 | 53.1566492 | 49.7796747 | 53.714134  | 0.203704714 | 5.61196377 | 0.033319647 | YDL206W   |
| YML060W   | 25.1866816 | 26.7066267 | 26.3286885 | 31.3973089 | 28.3431394 | 30.3433209 | 0.203647627 | 4.81648613 | 0.054897351 | OGG1      |
| YBL097W   | 36.4319103 | 35.1675623 | 37.6469983 | 45.4699257 | 41.5699378 | 38.6715941 | 0.203445675 | 5.29588495 | 0.042358813 | BRN1      |
| YKR015C   | 13.0865526 | 13.756215  | 15.1314302 | 12.4761435 | 16.940727  | 18.9807156 | 0.202983339 | 3.92275234 | 0.230128132 | YKR015C   |
| YKR052C   | 25.2524432 | 28.0304466 | 26.5102657 | 26.1939884 | 30.232682  | 35.5081415 | 0.20252267  | 4.8445884  | 0.106768213 | MRS4      |
| YFL016C   | 137.441683 | 115.863016 | 126.740859 | 150.068493 | 147.123698 | 139.966638 | 0.202519591 | 7.09072624 | 0.024169246 | MDJ1      |
| YOR248W   | 24.7263506 | 23.5409705 | 15.615636  | 4.84854864 | 20.3288724 | 48.3556327 | 0.202476063 | 4.51990514 | 0.682252902 | YOR248W   |
| YPL076W   | 13.3495989 | 11.5690344 | 15.9787903 | 14.1317454 | 15.4421242 | 17.4958297 | 0.202441242 | 3.88439119 | 0.210767547 | GPI2      |
| YOL140W   | 56.8837588 | 61.2410578 | 58.528372  | 64.9823776 | 66.2643052 | 72.1138074 | 0.202373019 | 5.98763496 | 0.019808304 | ARG8      |
| YOR245C   | 63.591439  | 61.7015169 | 64.5809441 | 78.4637079 | 69.5872939 | 70.3061202 | 0.202312679 | 6.09091917 | 0.020787657 | DGA1      |
| YDR236C   | 37.7471417 | 34.5344311 | 40.31013   | 42.587218  | 42.2215042 | 45.1276198 | 0.202203007 | 5.33846054 | 0.041489116 | FMN1      |
| YEL024W   | 81.8731557 | 72.4647479 | 78.1992313 | 87.6286475 | 92.0011789 | 87.8019499 | 0.202157181 | 6.38256735 | 0.016933447 | RIP1      |
| YNR049C   | 13.481122  | 18.0730189 | 14.526173  | 17.7385926 | 17.9832333 | 17.3667092 | 0.201749653 | 4.05853609 | 0.158872332 | MSO1      |
| YKR009C   | 24.2660196 | 22.7351671 | 22.9392482 | 27.0217894 | 25.6711711 | 27.6963504 | 0.201650919 | 4.65364704 | 0.066468187 | FOX2      |
| YBR293W   | 49.5184629 | 43.4558258 | 55.8652403 | 54.6348652 | 53.36329   | 63.1399316 | 0.201588321 | 5.73976924 | 0.066468398 | VBA2      |
| YLR256W   | 401.277105 | 361.920838 | 398.622397 | 431.698215 | 458.637605 | 445.659456 | 0.201570556 | 8.70185289 | 0.026832618 | HAP1      |
| YKL053W   | 6.7734418  | 6.33131237 | 7.14203505 | 5.49896371 | 8.34005021 | 9.49035782 | 0.201449085 | 2.88035307 | 0.338868412 | YKL053W   |
| YPL022W   | 121.527383 | 122.367001 | 126.801385 | 144.56953  | 146.732758 | 134.930938 | 0.201403569 | 7.05464324 | 0.014958698 | RAD1      |
| YJL149W   | 36.629195  | 36.1460379 | 34.8022895 | 41.9813358 | 40.4622748 | 41.1894441 | 0.201050637 | 5.27252887 | 0.030282948 | DAS1      |
| YIL063C   | 33.4726396 | 39.4843662 | 37.1627926 | 47.8942    | 39.4197686 | 39.2526364 | 0.200792333 | 5.30710941 | 0.073424121 | YRB2      |
| YKR105C   | 16.8349621 | 18.9939371 | 19.2471792 | 21.8184689 | 19.7424626 | 21.7568067 | 0.200335525 | 4.31193621 | 0.107201863 | VBA5      |
| YCR079W   | 52.872303  | 48.0028592 | 54.2310458 | 59.0695134 | 55.4483026 | 63.5918534 | 0.19998177  | 5.79825691 | 0.033269731 | PTC6      |

|           |            |            |            |            |            |            |             |             |             |         |
|-----------|------------|------------|------------|------------|------------|------------|-------------|-------------|-------------|---------|
| YGR197C   | 49.7815091 | 40.9808582 | 48.5416281 | 51.2645326 | 50.626711  | 58.0396713 | 0.199937581 | 5.64311205  | 0.05435475  | SNG1    |
| YEL075C   | 1.90708556 | 1.5540494  | 1.63419446 | 2.01037383 | 1.36828949 | 2.45328978 | 0.199682738 | 0.95749205  | 0.526013248 | YEL075C |
| YNL094W   | 97.1956017 | 93.0702918 | 91.7569927 | 108.382801 | 110.049569 | 105.36234  | 0.199487693 | 6.65939897  | 0.013198975 | APP1    |
| YNL009W   | 8.61476578 | 7.54001745 | 6.65782929 | 8.21888124 | 7.75364043 | 10.2005206 | 0.199339856 | 3.04866976  | 0.271190434 | IDP3    |
| YHR040W   | 29.1981375 | 27.3973153 | 29.052346  | 32.1659813 | 32.1873813 | 33.9586953 | 0.199260394 | 4.94357867  | 0.048952691 | BCD1    |
| YPL278C   | 0.92066199 | 0.57557385 | 0.96841153 | 1.30083012 | 0.84703635 | 0.64560257 | 0.199249207 | 0.0020249   | 0.717757288 | YPL278C |
| YPL217C   | 243.580858 | 216.645998 | 233.750334 | 277.135945 | 262.646425 | 256.820703 | 0.199202954 | 7.9573533   | 0.028769094 | BMS1    |
| YNL293W   | 34.4590631 | 32.9228243 | 32.078632  | 39.0840324 | 37.0741294 | 37.9614313 | 0.19911555  | 5.15841825  | 0.03836796  | MSB3    |
| YJL098W   | 114.425133 | 115.805459 | 118.933041 | 129.787369 | 135.525816 | 135.57654  | 0.199097657 | 6.96721194  | 0.013452023 | SAP185  |
| YIL056W   | 111.728909 | 100.092293 | 122.806687 | 119.085085 | 128.749525 | 136.286703 | 0.19897697  | 6.90562335  | 0.03855478  | VHR1    |
| YJR144W   | 58.9881291 | 59.1689919 | 61.1915037 | 64.3319625 | 72.0632463 | 69.4668368 | 0.198334376 | 6.0070256   | 0.020887829 | MGM101  |
| YCR068W   | 50.7679327 | 38.102989  | 46.3021764 | 51.855819  | 51.2131208 | 51.8418866 | 0.198056483 | 5.59832157  | 0.067316921 | ATG15   |
| YER077C   | 45.7700533 | 53.643483  | 48.8442567 | 55.0487657 | 52.5162537 | 62.6234495 | 0.198014463 | 5.73337009  | 0.049270726 | YER077C |
| YK1104C   | 416.204982 | 356.568001 | 411.998581 | 447.130791 | 450.883964 | 460.766556 | 0.197797619 | 8.72802142  | 0.036403433 | GF1     |
| YIL095W   | 46.2303843 | 51.5714171 | 50.720554  | 53.8070642 | 57.3378452 | 59.3308764 | 0.197679244 | 5.73568907  | 0.029675172 | PRK1    |
| YOR006C   | 36.8264797 | 36.4913822 | 39.6443471 | 43.6960664 | 42.2215042 | 43.5781737 | 0.197131135 | 5.3408951   | 0.035143793 | TSR3    |
| YLL040C   | 225.430665 | 214.746604 | 224.368847 | 233.912908 | 271.768355 | 256.175101 | 0.197062192 | 7.89382842  | 0.032800907 | VPS13   |
| YPL249C   | 58.9881291 | 52.8376796 | 55.8047146 | 63.5632902 | 64.6353891 | 63.8500944 | 0.196821761 | 5.90822003  | 0.022651129 | GYP5    |
| YEL074W   | 1.70980084 | 1.61160678 | 1.33156586 | 2.12863111 | 1.6940727  | 1.48488592 | 0.196537654 | 0.83657694  | 0.528080236 | YEL074W |
| YDL009C   | 4.34026368 | 3.45344311 | 3.87364613 | 5.26244914 | 4.30033839 | 3.74449492 | 0.196463764 | 2.09945194  | 0.378381428 | YDL009C |
| YLL057C   | 11.639798  | 10.1300998 | 10.9551555 | 11.3526993 | 13.8783648 | 12.2664489 | 0.196392375 | 3.56183061  | 0.020468749 | JLP1    |
| YLR035C   | 26.2388668 | 26.9368562 | 25.0576484 | 31.1607943 | 31.6009715 | 26.857067  | 0.196194201 | 4.81240582  | 0.079878761 | MLH2    |
| YNR006W   | 42.2189285 | 50.8231711 | 42.912736  | 51.6784331 | 53.36329   | 50.8089225 | 0.195856602 | 5.6077226   | 0.045906535 | VPS27   |
| YDL139C   | 3.35384011 | 3.8563448  | 2.66313171 | 3.42946124 | 3.45330204 | 4.45465775 | 0.195791022 | 1.87036946  | 0.392638786 | SCM3    |
| YDL159W   | 25.9100589 | 27.2246432 | 25.9655342 | 31.0425371 | 30.6236219 | 28.9229953 | 0.19547122  | 4.82808658  | 0.060800176 | STE7    |
| YJL093C   | 133.95632  | 110.567737 | 131.219763 | 139.602724 | 140.933817 | 149.521556 | 0.195132227 | 7.07040412  | 0.037483817 | TOK1    |
| YNL054W   | 88.580836  | 85.6453891 | 83.2833918 | 92.5363247 | 103.533905 | 98.7126334 | 0.194860239 | 6.52600099  | 0.020743092 | VAC7    |
| YLR401C   | 101.338581 | 99.8045058 | 107.191052 | 123.578862 | 119.106342 | 110.075239 | 0.194407597 | 6.78535547  | 0.022054379 | DUS3    |
| YNL027W   | 42.5477364 | 45.7005638 | 42.0048502 | 47.3029136 | 50.1706145 | 51.6482058 | 0.194222464 | 5.54471702  | 0.033597161 | CRZ1    |
| YKR072C   | 122.448045 | 120.294935 | 127.769797 | 139.957496 | 141.84601  | 142.032566 | 0.193960239 | 7.04992367  | 0.016427415 | SIS2    |
| YIR003W   | 91.2770604 | 79.0838472 | 85.9465235 | 110.925332 | 94.4119746 | 87.6082691 | 0.193691574 | 6.5182953   | 0.056458697 | AIM21   |
| YIL053W   | 870.814721 | 836.251249 | 859.646812 | 1070.05103 | 989.142986 | 876.018131 | 0.19358879  | 9.84095449  | 0.051262673 | GPP1    |
| YPL194W   | 19.465425  | 21.1811177 | 20.6392708 | 23.2375563 | 24.3034276 | 22.59609   | 0.193559598 | 4.46117948  | 0.091579351 | DDC1    |
| YOL108C   | 4.86635624 | 5.58306636 | 4.72100622 | 7.33195161 | 4.95190481 | 5.03570007 | 0.193533019 | 2.47359748  | 0.373599617 | INO4    |
| YLR095C   | 102.851097 | 95.2574724 | 96.4174732 | 111.930519 | 116.956173 | 107.686509 | 0.192809815 | 6.71827319  | 0.020113677 | IOC2    |
| YOR041C   | 11.2452286 | 9.6696407  | 10.834104  | 12.1805003 | 13.4874249 | 10.5878822 | 0.192775098 | 3.5168615   | 0.227896445 | YOR041C |
| YJR109C   | 114.951226 | 97.9051121 | 102.348994 | 123.519733 | 116.891016 | 119.565596 | 0.192292294 | 6.81555593  | 0.029128801 | CPA2    |
| YPL024W   | 17.2952931 | 19.1090519 | 16.8261504 | 23.4740709 | 20.0682458 | 17.2375887 | 0.192026565 | 4.25848148  | 0.183524774 | RM11    |
| YER147C   | 43.4026368 | 40.0023827 | 42.9732618 | 42.8682655 | 52.7117236 | 48.8075545 | 0.191741604 | 5.49914038  | 0.058404094 | SCC4    |
| Q0045     | 1.70980084 | 2.35985279 | 2.29997739 | 2.06950247 | 3.12751883 | 2.13048849 | 0.191720823 | 1.26662702  | 0.49103119  | COX1    |
| YNL089C   | 8.41748107 | 14.044002  | 9.56306389 | 14.36826   | 16.028534  | 6.1977847  | 0.191353345 | 3.53488496  | 0.518204093 | YNL089C |
| YKL157W   | 331.56984  | 312.536601 | 343.604517 | 370.263556 | 378.494935 | 378.96871  | 0.19128223  | 8.46223431  | 0.030682116 | APE2    |
| YDL130W-A | 6.51039552 | 7.07955837 | 5.74994348 | 9.51971136 | 6.51566423 | 6.00410393 | 0.191253976 | 2.812496309 | 0.375139545 | STF1    |
| YOL122C   | 193.602065 | 156.153186 | 180.971905 | 191.635929 | 200.161205 | 213.823572 | 0.190663037 | 7.56595254  | 0.057362347 | SMF1    |
| YKL129C   | 98.5765947 | 90.7679964 | 92.4833014 | 108.382801 | 104.250628 | 108.848594 | 0.190361706 | 6.65340616  | 0.020003296 | MYO3    |
| YLR234W   | 24.3975428 | 21.2962325 | 26.3892143 | 27.9678477 | 26.6490667 | 27.5672299 | 0.19023302  | 4.69072882  | 0.106173349 | TOP3    |
| YNL326C   | 38.9966115 | 31.7716766 | 36.3759582 | 37.7240736 | 43.8504202 | 40.6084018 | 0.190086331 | 5.25994075  | 0.082429733 | PFA3    |
| YBR136W   | 70.8909734 | 63.0828941 | 68.938796  | 73.1421302 | 82.1625259 | 76.1165433 | 0.189849248 | 6.17975083  | 0.032105319 | MEC1    |
| YOL019W   | 131.983473 | 103.833523 | 122.806687 | 125.234464 | 136.959262 | 146.745465 | 0.189691863 | 7.00019914  | 0.064535656 | YOL019W |
| YCR028C   | 82.2677252 | 70.9106985 | 80.9834144 | 84.7904726 | 91.0889859 | 90.9654025 | 0.188819785 | 6.38548552  | 0.033389352 | FEN2    |
| YGL007W   | 0.72337728 | 0.28778693 | 0.66578293 | 0.35477185 | 0.52125314 | 1.03296412 | 0.188809015 | -0.4876105  | 0.742183009 | BRP1    |
| YBL099W   | 1190.21867 | 944.804477 | 1117.66796 | 1366.28553 | 1217.64733 | 1123.34848 | 0.188794683 | 10.180043   | 0.093971937 | ATP1    |
| YNL171C   | 3.48536326 | 3.39588572 | 3.57101753 | 5.38070642 | 3.84424189 | 2.64697055 | 0.188771205 | 1.94710806  | 0.47115763  | YNL171C |
| YMR251W-A | 5.1951641  | 3.68367265 | 2.48155455 | 3.96161901 | 4.88674817 | 4.06729621 | 0.18872711  | 2.05326838  | 0.492273814 | HOR7    |
| YIR031C   | 28.0801908 | 29.5269386 | 27.9023573 | 33.0529109 | 33.5556708 | 30.859803  | 0.188541894 | 4.93635239  | 0.065118397 | DAL7    |
| YGR141W   | 57.0152819 | 56.8091391 | 57.9836405 | 67.1701373 | 61.4427137 | 67.0781073 | 0.188038862 | 5.93949705  | 0.027489754 | VPS62   |
| YFR047C   | 145.793403 | 112.294458 | 132.2487   | 166.801899 | 137.154732 | 140.353999 | 0.187551716 | 7.12123695  | 0.08917637  | BNA6    |
| YLR252W   | 3.35384011 | 3.97145957 | 3.87364613 | 5.02593457 | 4.82159153 | 2.90521158 | 0.187487587 | 2.0444436   | 0.449609009 | YLR252W |
| YER169W   | 115.806126 | 126.914034 | 123.290893 | 130.20127  | 137.219889 | 149.521556 | 0.187465744 | 7.02911859  | 0.032298871 | RPH1    |
| YHL005C   | 0.06576157 | 0.23022954 | 0.24210288 | 0.23651457 | 0.26062657 | 0.12912051 | 0.187398233 | -1.6438801  | 1           | YHL005C |
| YKR048C   | 261.533767 | 229.251065 | 259.897445 | 333.722056 | 277.371826 | 243.52129  | 0.187327734 | 8.06435545  | 0.107429495 | NAP1    |
| YDR129C   | 438.563916 | 423.967699 | 415.448548 | 534.522924 | 469.909704 | 450.566035 | 0.18726349  | 8.83169654  | 0.051384946 | SAC6    |
| YDR255C   | 25.0551585 | 29.9873977 | 29.1128717 | 34.9450274 | 30.8190918 | 30.0850799 | 0.187157977 | 4.91363357  | 0.102690566 | RMD5    |
| YPL214C   | 51.5570716 | 54.4492863 | 51.8705427 | 60.6659867 | 59.748641  | 59.3308764 | 0.186872729 | 5.8174512   | 0.027281378 | THI6    |
| YDR009W   | 6.57615709 | 6.79177145 | 7.08150933 | 7.0363084  | 7.94911036 | 8.32827319 | 0.186588107 | 2.88953339  | 0.263274716 | GAL3    |
| YIL072W   | 12.9550295 | 12.259723  | 12.7709271 | 13.540459  | 13.6828949 | 16.0109438 | 0.186458411 | 3.77075044  | 0.187556725 | HOP1    |
| YLR189C   | 113.767518 | 109.934606 | 105.566857 | 134.517661 | 124.058247 | 115.950222 | 0.186280824 | 6.87554064  | 0.032926129 | ATG26   |
| YOR055W   | 2.30165498 | 2.30229541 | 1.57366874 | 2.60166025 | 2.86689226 | 1.54944617 | 0.18603487  | 1.21604295  | 0.567085881 | YOR055W |
| YOR196C   | 58.1332286 | 56.2911227 | 56.5915489 | 65.8101786 | 67.3068115 | 61.3968047 | 0.186028082 | 5.93164014  | 0.029339135 | LIP5    |
| YHR037W   | 107.125599 | 120.352492 | 106.343691 | 132.921187 | 119.953378 | 126.925466 | 0.186018771 | 6.89565329  | 0.034090095 | PUT2    |
| YHR142W   | 106.204937 | 85.0122579 | 103.620034 | 120.385915 | 109.267689 | 105.556021 | 0.185952275 | 6.71588356  | 0.063485261 | CHS7    |
| YML038C   | 131.260095 | 114.136295 | 126.438231 | 147.644219 | 136.894105 | 138.223511 | 0.185724242 | 7.05034837  | 0.034620261 | YMD8    |
| YMR176W   | 95.6830856 | 93.0702918 | 86.9149351 | 101.050849 | 107.182677 | 105.29778  | 0.185663007 | 6.61926954  | 0.025425876 | ECM5    |



|           |            |            |            |            |             |            |              |            |             |           |
|-----------|------------|------------|------------|------------|-------------|------------|--------------|------------|-------------|-----------|
| YOR015W   | 14.9936382 | 14.8498054 | 16.4629961 | 16.3195052 | 17.7877633  | 18.5933541 | 0.18554474   | 4.05440335 | 0.157908257 | YOR015W   |
| YIL142W   | 259.692443 | 262.116332 | 249.971227 | 303.093419 | 285.711876  | 288.711347 | 0.18529601   | 8.10331456 | 0.033921358 | CCT2      |
| YEL034C-A | 1990.0109  | 1650.80336 | 1856.92911 | 2085.4672  | 2020.63779  | 2144.04614 | 0.185079047  | 10.9352277 | 0.062391111 | YEL034C-A |
| YPR085C   | 25.9758205 | 30.2176272 | 29.2339231 | 33.8807119 | 29.6462722  | 33.635894  | 0.184966451  | 4.93383565 | 0.094949251 | ASA1      |
| YDR223W   | 16.3088696 | 13.1806412 | 15.615636  | 17.0290489 | 16.8755703  | 17.3021489 | 0.184866897  | 4.01439692 | 0.183316647 | CRF1      |
| YBR098W   | 19.465425  | 17.785232  | 18.2787677 | 20.0446096 | 21.306222   | 21.7568067 | 0.184840896  | 4.31340519 | 0.128054029 | MMS4      |
| YDR273W   | 9.4696662  | 8.9213947  | 10.410424  | 12.0031143 | 10.2295928  | 10.4587617 | 0.184551635  | 3.3749941  | 0.247477703 | DON1      |
| YGR088W   | 24.0029734 | 23.3682984 | 21.9708366 | 25.4253161 | 26.9096933  | 26.4697055 | 0.184472733  | 4.63251206 | 0.094040288 | CIT1      |
| YLR233C   | 17.9529088 | 21.5840194 | 20.7603222 | 22.291498  | 23.7170178  | 22.59609   | 0.184085441  | 4.43370344 | 0.127645209 | EST1      |
| YDR171W   | 39.3911809 | 44.7796456 | 39.46277   | 56.5861104 | 43.9807335  | 39.8336787 | 0.184017553  | 5.46448411 | 0.144172062 | HSP42     |
| YDR242W   | 29.0666143 | 24.0014296 | 25.7839571 | 28.6182627 | 28.9295492  | 31.9573273 | 0.183964158  | 4.81568097 | 0.111881802 | AMD2      |
| YFL008W   | 105.350037 | 92.6673901 | 95.2069588 | 117.015583 | 112.786148  | 103.102731 | 0.183792616  | 6.70691867 | 0.039180129 | SWC1      |
| YNR004W   | 4.07721739 | 4.71970558 | 4.53942906 | 4.61203408 | 3.97455518  | 6.58514624 | 0.182901415  | 2.28516482 | 0.426375392 | SWM2      |
| YLR338W   | 25.0551585 | 21.9293637 | 24.1497266 | 22.6462699 | 31.144875   | 26.9861875 | 0.182801864  | 4.66750272 | 0.169797103 | OPI9      |
| YNL095C   | 63.2626312 | 52.60745   | 55.502086  | 64.745863  | 62.2245934  | 67.4009086 | 0.182726023  | 5.93219504 | 0.053277136 | YNL095C   |
| YKL159C   | 12.6919832 | 12.3172804 | 12.5288242 | 13.1856872 | 14.6602445  | 14.7842989 | 0.182690239  | 3.75207728 | 0.184272291 | RCN1      |
| YJR035W   | 40.7064124 | 37.5274151 | 42.2469531 | 44.9968966 | 46.5218426  | 45.1921801 | 0.182666057  | 5.42551012 | 0.049642176 | RAD26     |
| YGR012W   | 51.1625021 | 50.8807285 | 52.5968514 | 58.2417124 | 57.2075319  | 60.0410393 | 0.182434539  | 5.78501562 | 0.031912156 | YGR012W   |
| YJR117W   | 307.566867 | 235.75505  | 292.399757 | 286.9513   | 315.162679  | 345.913858 | 0.182006153  | 8.21615765 | 0.109671887 | STE24     |
| YGR136W   | 69.9045498 | 90.3650947 | 73.6598022 | 89.2251208 | 91.5450824  | 84.7676178 | 0.182001649  | 6.38164894 | 0.071963553 | LSB1      |
| YBR222C   | 202.085307 | 156.786317 | 192.290215 | 190.157713 | 209.608918  | 225.250738 | 0.181574053  | 7.61558386 | 0.098930429 | PCS60     |
| YMR086C-A | 2.76198598 | 2.12962325 | 2.11840023 | 2.54253161 | 2.9320489   | 2.45328978 | 0.181359313  | 1.38118162 | 0.490718346 | YMR086C-A |
| Q0075     | 0.39456943 | 0.46045908 | 0.3026286  | 0.47302914 | 0.32578321  | 0.51648206 | 0.181197264  | -0.8974169 | 0.885357853 | AI5 BETA  |
| YAL024C   | 89.8960674 | 74.9972728 | 82.5570832 | 90.4668223 | 97.9304333  | 92.0629269 | 0.181186514  | 6.46082874 | 0.04626295  | LTE1      |
| YNL144C   | 23.4768808 | 22.7351671 | 22.5760939 | 26.7261462 | 24.3685842  | 26.857067  | 0.181123818  | 4.61920987 | 0.104557862 | YNL144C   |
| YBR125C   | 50.2418401 | 48.6359904 | 51.6284398 | 50.0228311 | 59.6183277  | 61.0740034 | 0.1811033108 | 5.74523377 | 0.065822122 | PTC4      |
| YIL104C   | 24.5290659 | 25.9583807 | 26.0260599 | 29.6825783 | 28.9295492  | 28.1482722 | 0.180991473  | 4.77280389 | 0.086523226 | SHQ1      |
| YDR249C   | 24.3317812 | 20.8933308 | 24.1497626 | 23.7697141 | 25.3459338  | 29.5040376 | 0.180639295  | 4.6304006  | 0.150535686 | YDR249C   |
| YLR030W   | 13.941453  | 10.3027719 | 12.347247  | 12.9491726 | 13.4874249  | 14.9779797 | 0.180545727  | 3.71164078 | 0.256852827 | YLR030W   |
| YMR021C   | 22.3589341 | 29.5269386 | 22.9997739 | 26.4896316 | 29.1901757  | 29.3103568 | 0.180252978  | 4.74281271 | 0.158858092 | MAC1      |
| YIR024C   | 5.85277981 | 5.23772205 | 5.02363483 | 6.91805112 | 5.60347123  | 5.68130264 | 0.180203218  | 2.54689393 | 0.350125706 | INA22     |
| YFL040W   | 15.1251613 | 13.5835429 | 13.1340814 | 14.7821605 | 15.3118109  | 17.3021489 | 0.180200917  | 3.90507998 | 0.200588989 | YFL040W   |
| YBR160W   | 30.3160842 | 40.1174974 | 28.9918203 | 41.3309208 | 38.0514791  | 33.3130927 | 0.180034437  | 5.1497152  | 0.176442855 | CDC28     |
| YMR053C   | 15.6512539 | 17.4398877 | 17.3708819 | 20.3993815 | 18.765113   | 18.0123118 | 0.179888888  | 4.17565614 | 0.161910392 | STB2      |
| YDR011W   | 602.573274 | 490.791823 | 561.073432 | 626.586219 | 641.076203  | 606.220816 | 0.17978659   | 9.20005274 | 0.070666606 | SNQ2      |
| YDR104C   | 42.8765442 | 40.8657435 | 37.5864726 | 47.7168141 | 43.0685405  | 46.5479455 | 0.17964939   | 5.43392725 | 0.062822484 | SPO71     |
| YPL130W   | 7.56258065 | 7.13711576 | 6.4157264  | 7.62759482 | 8.86130335  | 7.42442959 | 0.179527094  | 2.92959031 | 0.297515294 | SPO19     |
| YNL217W   | 60.3691221 | 70.9106985 | 65.6098813 | 73.496902  | 74.7998253  | 74.8253382 | 0.179490932  | 6.13196521 | 0.041314743 | YNL217W   |
| YKL075C   | 26.9622441 | 26.5915119 | 22.5760939 | 31.4564375 | 29.5811156  | 25.1139401 | 0.179429216  | 4.76402979 | 0.152361898 | YKL075C   |
| YDR038C   | 213.001728 | 166.801302 | 213.534743 | 224.393196 | 220.164294  | 227.187545 | 0.17932407   | 7.7207473  | 0.088699625 | ENA5      |
| YFR017C   | 8.08867322 | 6.56154191 | 7.32361222 | 8.8692963  | 7.23238729  | 8.71563473 | 0.179300936  | 2.9847516  | 0.314185029 | IJD1      |
| YOR079C   | 32.946547  | 31.3112175 | 34.6207123 | 39.4388042 | 34.9891169  | 37.4449492 | 0.179024083  | 5.13945928 | 0.076003969 | ATX2      |
| YLO14W    | 135.534598 | 121.73387  | 138.543375 | 142.618285 | 155.268279  | 150.102598 | 0.17872694   | 7.13687312 | 0.042018853 | BUD3      |
| YLR057W   | 81.0182553 | 74.3641416 | 79.8939514 | 84.4948294 | 90.52025761 | 91.2236435 | 0.178351537  | 6.38697159 | 0.033119383 | MNL2      |
| YOL085C   | 0.52609257 | 0.46045908 | 0.24210288 | 0.23651457 | 0.65156642  | 0.51648206 | 0.17818867   | -0.8419373 | 0.89035219  | YOL085C   |
| YHR206W   | 121.00129  | 111.315983 | 124.804036 | 118.43467  | 136.698635  | 148.940514 | 0.178011368  | 6.98827951 | 0.06954462  | SKN7      |
| YCR083W   | 11.2452286 | 15.3102644 | 10.7735783 | 12.2396289 | 12.5100753  | 17.56039   | 0.177980357  | 3.74401632 | 0.350003986 | TRX3      |
| YDL125C   | 210.17398  | 178.830796 | 203.911153 | 234.031165 | 226.679958  | 209.885396 | 0.177916421  | 7.71902305 | 0.06414595  | HNT1      |
| YKL133C   | 11.7055596 | 13.2381986 | 10.9551555 | 13.6587163 | 13.0964851  | 13.8804553 | 0.177689127  | 3.68726611 | 0.219044945 | YKL133C   |
| YBR269C   | 35.6427714 | 31.665618  | 33.2891464 | 37.664945  | 40.9183713  | 35.12078   | 0.177555624  | 5.16287344 | 0.08826445  | SDH8      |
| YHR162W   | 63.6572006 | 78.4507159 | 73.7808536 | 86.2686887 | 78.5137539  | 79.4736767 | 0.177518017  | 6.26362486 | 0.062013149 | MPC2      |
| YCR006C   | 3.81417111 | 4.77726297 | 4.84205766 | 4.73029136 | 6.18988101  | 4.32553724 | 0.177507149  | 2.29401442 | 0.40267032  | YCR006C   |
| YDL094C   | 3.87993268 | 2.12962325 | 3.44996609 | 3.07468938 | 3.71392861  | 3.87361544 | 0.177145919  | 1.78975243 | 0.498244845 | YDL094C   |
| YJR142W   | 27.0937672 | 33.7286277 | 26.0260599 | 33.2302968 | 31.6009715  | 33.4422133 | 0.177049686  | 4.95360093 | 0.134572131 | YJR142W   |
| YLR087C   | 112.781094 | 106.193376 | 116.875167 | 114.236536 | 134.939406  | 130.54084  | 0.176867311  | 6.89921587 | 0.050853505 | CSF1      |
| YEL035C   | 0.32880785 | 0.17267216 | 0.72630865 | 0.29564321 | 0.52125314  | 0.58104232 | 0.176855039  | -0.8420944 | 0.892311627 | UTR5      |
| YKR097W   | 8.3517195  | 5.35283682 | 8.65517807 | 8.8692963  | 7.23238729  | 9.10299627 | 0.176407808  | 3.00675157 | 0.411679956 | PCK1      |
| YCR022C   | 1.1179467  | 0.92091816 | 0.90788581 | 1.41908741 | 1.04250628  | 0.83928334 | 0.176163361  | 0.22222458 | 0.673716601 | YCR022C   |
| YBR273C   | 50.7021711 | 44.8947604 | 45.2127134 | 56.4678531 | 51.0176509  | 51.454525  | 0.176118867  | 5.64600625 | 0.063882825 | UBX7      |
| YDL058W   | 218.591462 | 187.406846 | 205.424296 | 245.088221 | 228.439188  | 216.922464 | 0.175697281  | 7.76216455 | 0.065873464 | USO1      |
| YDL176W   | 43.3368752 | 47.081941  | 42.9732618 | 47.3620423 | 55.187676   | 48.2265122 | 0.17568879   | 5.56918249 | 0.070338258 | YDL176W   |
| YGL073W   | 89.8987827 | 83.688438  | 92.4227757 | 93.4232544 | 97.2788669  | 109.494196 | 0.175423687  | 6.56134142 | 0.051910096 | HSF1      |
| YPR127W   | 58.0674671 | 58.3056311 | 58.0441662 | 67.1701373 | 63.7883528  | 65.9805829 | 0.175376705  | 5.95452225 | 0.033785231 | YPR127W   |
| YNL108C   | 32.025885  | 39.8297105 | 28.9918203 | 39.7935761 | 38.4424189  | 35.7018223 | 0.175273548  | 5.16726971 | 0.15068566  | YNL108C   |
| YJL004C   | 46.3619075 | 41.3262025 | 45.2732392 | 50.6732462 | 49.9751446  | 49.3885968 | 0.175207251  | 5.5631171  | 0.054263699 | SYS1      |
| YOR054C   | 37.1552875 | 37.0093986 | 41.3390673 | 47.0072704 | 42.5472874  | 40.8020826 | 0.175090391  | 5.3612385  | 0.08270464  | VHS3      |
| YPR018W   | 38.7335652 | 34.4193163 | 35.1049181 | 48.3081005 | 38.246949   | 35.5081415 | 0.174959551  | 5.26740124 | 0.152843878 | RLF2      |
| YGR134W   | 74.7051445 | 67.5148128 | 74.9913681 | 83.0166134 | 81.5761161  | 80.5066408 | 0.174833447  | 6.26987555 | 0.037663651 | CAF130    |
| YPR064W   | 0.19728471 | 0.74824601 | 0.36315432 | 0.35477185 | 0.58640978  | 0.58104232 | 0.174655117  | -0.7402791 | 0.793115907 | YPR064W   |
| YKL203C   | 187.420477 | 175.492467 | 190.171815 | 201.392155 | 215.538173  | 207.173866 | 0.174305472  | 7.61696998 | 0.048294212 | TOR2      |
| YMR247C   | 144.280886 | 139.1162   | 143.688061 | 154.325756 | 165.106931  | 162.498168 | 0.174246598  | 7.24424924 | 0.034116287 | RKR1      |
| YIR002C   | 78.5850772 | 73.5007808 | 75.0518938 | 90.8807228 | 87.1144307  | 78.1824715 | 0.174232831  | 6.33400266 | 0.047513314 | MPH1      |
| YEL063C   | 200.704314 | 167.607106 | 208.269005 | 195.06539  | 221.728054  | 233.772692 | 0.174201928  | 7.67679192 | 0.103633041 | CAN1      |

|           |            |            |            |            |            |            |             |            |             |           |
|-----------|------------|------------|------------|------------|------------|------------|-------------|------------|-------------|-----------|
| YNL062C   | 58.2647518 | 76.1484205 | 65.8519842 | 79.114123  | 74.2134155 | 72.7594099 | 0.174151807 | 6.15384143 | 0.087336664 | GCD10     |
| YNR011C   | 54.253296  | 50.7080563 | 51.9915942 | 55.9356953 | 59.3577011 | 61.7841662 | 0.174061808 | 5.80166182 | 0.047966145 | PRR2      |
| YML070W   | 230.099736 | 216.58844  | 218.982058 | 265.014573 | 247.139144 | 238.679271 | 0.173886956 | 7.88388697 | 0.052473611 | DAK1      |
| YDR109C   | 53.0038261 | 49.9022529 | 56.4704975 | 60.1929576 | 59.748641  | 59.7827982 | 0.173642153 | 5.82356367 | 0.047787191 | YDR109C   |
| YOL006C   | 121.00129  | 123.633263 | 126.135602 | 147.112061 | 140.282251 | 130.669961 | 0.173310008 | 7.04000098 | 0.039084718 | TOP1      |
| YLR241W   | 183.803591 | 146.828889 | 166.445732 | 191.5768   | 186.86925  | 181.801684 | 0.173020009 | 7.4620891  | 0.077412165 | CSC1      |
| YER165C-A | 5.39244881 | 4.71970558 | 4.59995478 | 4.96680593 | 6.45050758 | 5.16482058 | 0.172425106 | 2.4131551  | 0.390936429 | YER165C-A |
| YJL036W   | 28.2774755 | 30.7932011 | 30.565489  | 36.1867289 | 33.8162973 | 30.9889235 | 0.172047825 | 4.99563436 | 0.106185752 | SNX4      |
| YCR076C   | 28.6062833 | 28.0880039 | 30.141809  | 35.181542  | 32.1873813 | 30.4078812 | 0.172038526 | 4.94930391 | 0.105352538 | FUB1      |
| YIL075C   | 715.354368 | 657.075109 | 667.17502  | 834.719039 | 762.072088 | 700.930713 | 0.17199551  | 9.49786933 | 0.079602493 | RPN2      |
| YNL205C   | 1.1179467  | 1.1511477  | 1.7552459  | 1.1234442  | 2.15016919 | 1.29120515 | 0.171909441 | 0.63217121 | 0.65468861  | YNL205C   |
| YMR221C   | 172.229554 | 129.734346 | 154.522165 | 164.436753 | 165.693341 | 183.932173 | 0.171727611 | 7.33851619 | 0.109202069 | YMR221C   |
| YPR038W   | 13.3495989 | 10.1876572 | 12.347247  | 12.3578862 | 15.3118109 | 12.7183707 | 0.171669682 | 3.67941853 | 0.292585169 | IRC16     |
| YNL215W   | 22.8192651 | 23.8287574 | 26.5102657 | 30.9834084 | 25.4110905 | 25.9532234 | 0.171413155 | 4.7034042  | 0.163222385 | IES2      |
| YHR161C   | 76.3491838 | 74.3065842 | 80.0755286 | 83.253128  | 89.3297565 | 87.2854678 | 0.171367395 | 6.35542018 | 0.037524612 | YAP1801   |
| YER006W   | 189.064516 | 207.551931 | 199.00857  | 220.608963 | 228.113405 | 222.087285 | 0.17129224  | 7.72243721 | 0.050910943 | NUG1      |
| YDR507C   | 167.494721 | 147.231791 | 159.303697 | 186.78738  | 177.877633 | 168.954193 | 0.171217895 | 7.3927936  | 0.058088719 | GIN4      |
| YKR054C   | 161.378895 | 145.735299 | 161.724726 | 161.184678 | 191.039275 | 175.539339 | 0.170751634 | 7.37678008 | 0.070365413 | DYN1      |
| YNL162W-A | 0.39456943 | 0.92091816 | 0.66578293 | 0.7095437  | 0.65156642 | 0.9038436  | 0.170538143 | -0.2586463 | 0.752652318 | YNL162W-A |
| YLR137W   | 29.1323759 | 30.9658732 | 34.3786094 | 38.7883892 | 33.3602008 | 34.1523761 | 0.170363936 | 5.07026753 | 0.12496565  | RKM5      |
| YJL144W   | 1.18370828 | 1.26626247 | 1.39209158 | 1.59647333 | 1.88954263 | 0.83928334 | 0.170164709 | 0.57196445 | 0.635564696 | YJL144W   |
| YLR454W   | 183.145975 | 178.830796 | 180.003494 | 200.919126 | 205.569206 | 203.23569  | 0.16992971  | 7.58545207 | 0.046003457 | FMP27     |
| YEL020C   | 49.9787939 | 45.3552195 | 50.1152968 | 57.4139114 | 52.3859404 | 53.714134  | 0.169915014 | 5.68964437 | 0.064809424 | YEL020C   |
| YFL055W   | 12.2316522 | 7.94291915 | 10.4709497 | 12.7717867 | 10.750846  | 10.8461232 | 0.169747038 | 3.45219933 | 0.365607781 | AGP3      |
| YLR207W   | 95.4200393 | 92.0342588 | 91.5148898 | 101.819522 | 106.33564  | 105.620581 | 0.169645098 | 6.62793773 | 0.034848815 | HRD3      |
| YML049C   | 155.789161 | 145.792857 | 151.374828 | 161.362064 | 172.209006 | 175.797581 | 0.169339789 | 7.3263802  | 0.047915998 | RSE1      |
| YGL140C   | 277.11926  | 212.616981 | 262.984257 | 283.46271  | 277.371826 | 285.485458 | 0.169329262 | 8.05856563 | 0.110031908 | YGL140C   |
| YNR050C   | 211.226166 | 186.946387 | 196.769118 | 222.323694 | 222.900873 | 223.701291 | 0.169302104 | 7.71940483 | 0.057749768 | LYS9      |
| YLR006C   | 61.750115  | 60.5503692 | 58.0441662 | 69.7717976 | 67.0461849 | 65.9160227 | 0.169257641 | 5.99923995 | 0.043746474 | SSK1      |
| YJL132W   | 31.6970772 | 30.1025124 | 29.5970775 | 35.6545711 | 31.9919114 | 35.0562197 | 0.16923337  | 5.0210186  | 0.099696301 | YJL132W   |
| YNL015W   | 1.77556241 | 2.53252495 | 0.90788581 | 2.36514568 | 2.08501255 | 1.42032566 | 0.168976268 | 0.98559864 | 0.634459303 | PBI2      |
| YLR337C   | 166.705582 | 163.808318 | 176.493002 | 158.169117 | 194.883517 | 217.051585 | 0.16895533  | 7.48877384 | 0.128693572 | VRP1      |
| YLR094C   | 78.8481235 | 80.9256835 | 90.3043754 | 89.9346645 | 94.2165047 | 97.0340667 | 0.168710463 | 6.47022897 | 0.052390882 | GIS3      |
| YJL023C   | 10.2588051 | 12.0870509 | 10.3498983 | 13.6587163 | 12.6403886 | 10.4587617 | 0.168663849 | 3.54983416 | 0.300393773 | PET130    |
| YFL042C   | 40.9036971 | 36.606497  | 39.9469757 | 49.549802  | 43.6549503 | 38.6715941 | 0.168516232 | 5.38129027 | 0.126781418 | YFL042C   |
| YJL222W   | 66.9452791 | 42.9378093 | 75.7782024 | 55.2852803 | 73.2360659 | 80.1192793 | 0.168438029 | 6.0397664  | 0.336852188 | VTH2      |
| YMR227C   | 31.9601234 | 26.4188398 | 31.3523234 | 36.3049862 | 31.4706582 | 32.9257312 | 0.168328764 | 4.99345044 | 0.142156462 | TAf7      |
| YGR216C   | 75.7573296 | 67.3421406 | 76.9887169 | 74.2655744 | 82.879249  | 90.1906794 | 0.168297858 | 6.28547093 | 0.079905955 | GPI1      |
| YBR140C   | 288.298727 | 245.079346 | 292.702386 | 283.640096 | 323.958825 | 320.541677 | 0.168090779 | 8.19212745 | 0.09648188  | IRA1      |
| YGL198W   | 102.588051 | 92.1493736 | 91.8780442 | 112.34442  | 106.270484 | 103.231851 | 0.167934013 | 6.66569012 | 0.05062143  | YIP4      |
| YJL100W   | 35.5770098 | 34.2466442 | 37.3443697 | 40.2074766 | 40.3319616 | 39.8336787 | 0.167837152 | 5.24947445 | 0.076031436 | LSB6      |
| YMR218C   | 75.8888528 | 86.0482908 | 80.2571058 | 93.482383  | 91.4799257 | 87.1563473 | 0.167645158 | 6.42374017 | 0.04913944  | TRS130    |
| YPL026C   | 74.3763367 | 93.1854065 | 78.6229113 | 84.4948294 | 91.8057089 | 100.3912   | 0.167518747 | 6.44743541 | 0.101384841 | SKS1      |
| YBR126W-A | 11.7713212 | 10.4754441 | 10.2893725 | 15.4325756 | 10.8160026 | 10.2005206 | 0.167249827 | 3.53998231 | 0.372675176 | YBR126W-A |
| YMR155W   | 53.2011108 | 43.2831536 | 57.5599605 | 54.2209647 | 54.9270494 | 63.7855342 | 0.167240297 | 5.77076612 | 0.143723811 | YMR155W   |
| YPL082C   | 263.112045 | 252.274019 | 245.734426 | 263.240714 | 304.411833 | 286.841223 | 0.166880857 | 8.07346169 | 0.072108606 | MOT1      |
| YHR056W-A | 4.60330996 | 4.20168912 | 6.65782929 | 6.44502198 | 5.14737474 | 5.7458629  | 0.166700575 | 2.48394063 | 0.449067585 | YHR056W-A |
| YMR084W   | 2.89350912 | 2.30229541 | 2.60260599 | 3.01556074 | 3.19267547 | 2.51785003 | 0.166551084 | 1.52227457 | 0.517707434 | YMR084W   |
| YFR031C   | 98.2477869 | 92.4371605 | 100.654274 | 109.151473 | 108.746436 | 109.042275 | 0.166537167 | 6.68875664 | 0.040225313 | SMC2      |
| YNR035C   | 250.222777 | 241.165444 | 232.660871 | 257.505236 | 266.490667 | 288.64891  | 0.166519927 | 8.00126303 | 0.06748042  | ARC35     |
| YLL009C   | 0.92066199 | 1.38137724 | 0.90788581 | 1.71473062 | 1.04250628 | 0.83928334 | 0.166461779 | 0.34294073 | 0.706180983 | COX17     |
| YGL158W   | 3.68264797 | 3.68367265 | 3.93417185 | 4.37551951 | 4.6261216  | 3.67993466 | 0.166387076 | 2.04269911 | 0.436674292 | RCK1      |
| YHR172W   | 43.4026368 | 42.0744485 | 38.9785642 | 45.4699257 | 46.9127824 | 47.2581083 | 0.166203571 | 5.46365492 | 0.071458758 | SPC97     |
| YPR116W   | 5.91854138 | 6.50398452 | 5.99204636 | 4.90767729 | 6.97176072 | 8.84475525 | 0.166192307 | 2.72934119 | 0.451825927 | RRG8      |
| YPL277C   | 11.9686059 | 10.4178867 | 10.2288468 | 13.4222017 | 12.8358585 | 10.2650809 | 0.165762478 | 3.54135299 | 0.313401204 | YPL277C   |
| YDL126C   | 1058.95858 | 995.282304 | 989.474484 | 1249.97949 | 1092.22079 | 1071.70027 | 0.165640553 | 10.0719901 | 0.089784512 | CDC48     |
| YKL210W   | 705.884702 | 671.694685 | 664.996094 | 781.14849  | 751.516712 | 757.291818 | 0.164972878 | 9.49626446 | 0.064732241 | UBA1      |
| YKL052C   | 49.1238934 | 40.5779565 | 46.1205992 | 48.6628724 | 48.4113852 | 55.0698994 | 0.164503749 | 5.58786169 | 0.108675536 | ASK1      |
| YGL056C   | 91.7373914 | 109.128802 | 114.151509 | 103.356866 | 116.63039  | 133.252371 | 0.16448131  | 6.80083738 | 0.133315165 | SDS23     |
| YER168C   | 71.877397  | 84.9547005 | 74.2045337 | 78.6410939 | 87.0492741 | 93.4186923 | 0.16440324  | 6.3542269  | 0.087958834 | CCA1      |
| YGR009C   | 81.4128247 | 72.2920757 | 83.7070719 | 88.3973198 | 89.06913   | 88.5121127 | 0.164347284 | 6.39247174 | 0.056608222 | SEC9      |
| YCL043C   | 2415.02793 | 1744.6219  | 2218.38872 | 2506.46313 | 2371.05021 | 2269.74496 | 0.164309977 | 11.1384735 | 0.166429191 | PDI1      |
| YAL019W   | 147.503203 | 134.454052 | 144.293318 | 154.739656 | 158.526111 | 164.305855 | 0.164155281 | 7.23596843 | 0.051526718 | FUN30     |
| YOR141C   | 84.2405723 | 79.947208  | 78.1992313 | 97.621388  | 90.2419495 | 83.6055332 | 0.164144253 | 6.42232027 | 0.062637864 | ARP8      |
| YGR260W   | 327.624146 | 262.404119 | 325.870481 | 315.68782  | 334.709671 | 375.805258 | 0.164131154 | 8.33885727 | 0.135012172 | TNA1      |
| YPR155C   | 40.8379355 | 50.9958432 | 40.975913  | 55.3444089 | 48.4113852 | 45.0630596 | 0.163855285 | 5.55715708 | 0.153004988 | NCA2      |
| YHR118C   | 13.4153605 | 14.7346906 | 16.2208932 | 15.9647333 | 17.85292   | 15.9463835 | 0.163754106 | 3.98290364 | 0.23174433  | ORC6      |
| YCL010C   | 53.2668724 | 46.3912524 | 56.5915489 | 63.3859042 | 57.6636284 | 53.8432546 | 0.163673063 | 5.7894859  | 0.111306963 | SGF29     |
| YER004W   | 109.427254 | 87.8901271 | 101.320057 | 104.362053 | 108.941906 | 121.115043 | 0.163638185 | 6.72253036 | 0.09854776  | FMP52     |
| YMR020W   | 35.1824404 | 35.3402345 | 35.6496495 | 41.6856926 | 41.2441546 | 35.9600633 | 0.163582215 | 5.23398362 | 0.102127711 | FMS1      |
| YOR162C   | 35.7742946 | 41.0384156 | 39.46277   | 42.5726222 | 41.9608776 | 45.7732224 | 0.163165466 | 5.36540765 | 0.095441916 | YRR1      |
| YML130C   | 166.508297 | 198.285192 | 182.18242  | 208.014563 | 199.965735 | 204.526895 | 0.162987346 | 7.59530539 | 0.081090865 | ERO1      |
| YER042W   | 9.86423563 | 14.792248  | 9.74464105 | 14.5456459 | 12.9661718 | 11.039804  | 0.162751568 | 3.62152654 | 0.39866898  | MXR1      |

|           |             |            |            |            |             |            |             |            |             |           |
|-----------|-------------|------------|------------|------------|-------------|------------|-------------|------------|-------------|-----------|
| YDR421W   | 39.2596578  | 39.599481  | 38.0101527 | 44.8195106 | 40.5925881  | 45.3585609 | 0.162730409 | 5.37157679 | 0.086754954 | ARO80     |
| YDR122W   | 156.5125239 | 143.087659 | 156.035308 | 174.784266 | 173.251512  | 161.788005 | 0.162377528 | 7.33113928 | 0.062531627 | KIN1      |
| YPL091W   | 207.872326  | 233.452754 | 208.874262 | 267.616234 | 237.235334  | 222.668327 | 0.162122105 | 7.84397713 | 0.102032111 | GLR1      |
| YIL013C   | 51.4255484  | 43.2255962 | 52.5968514 | 50.9688894 | 56.4256522  | 57.3295084 | 0.162089491 | 5.70309259 | 0.111600019 | PDR11     |
| YJR134C   | 64.6436242  | 61.125943  | 63.4914811 | 73.2603875 | 68.479631   | 69.9187586 | 0.161987127 | 6.06477747 | 0.053585599 | SGM1      |
| YER068C-A | 3.68264797  | 2.87786926 | 3.38944036 | 2.77904617 | 3.97455518  | 4.39009749 | 0.161801229 | 1.85677381 | 0.51223055  | YER068C-A |
| YMR302C   | 125.538839  | 117.877525 | 119.417247 | 144.037372 | 133.31049   | 128.410352 | 0.161759549 | 7.00247055 | 0.057622296 | YME2      |
| YLR134W   | 37.7471417  | 30.6205289 | 35.8312267 | 37.9014595 | 39.6152385  | 38.9298351 | 0.161461459 | 5.20466665 | 0.128027339 | PDC5      |
| YDR135C   | 422.781139  | 375.73461  | 406.067061 | 429.569584 | 448.603482  | 468.901149 | 0.161342972 | 8.73260796 | 0.080703625 | YCF1      |
| YER164W   | 171.243131  | 157.937465 | 176.674579 | 194.888004 | 195.078987  | 175.66846  | 0.161337445 | 7.48138195 | 0.078375615 | CHD1      |
| YLL034C   | 121.658906  | 125.590214 | 126.014551 | 148.294634 | 134.222683  | 134.866377 | 0.161321466 | 7.04333943 | 0.054203711 | RIX7      |
| YDR178W   | 57.4756129  | 47.1970558 | 49.3889882 | 58.0051978 | 54.2103264  | 59.9119187 | 0.161195574 | 5.76739938 | 0.105577996 | SDH4      |
| YLR011W   | 4.14297896  | 4.83482035 | 4.90258338 | 5.79460692 | 4.69127824  | 5.03570007 | 0.160964356 | 2.33143628 | 0.428484667 | LOT6      |
| YGR258C   | 75.6258065  | 70.2775673 | 77.3518712 | 87.1556183 | 82.4231525  | 79.8610382 | 0.16059973  | 6.3019884  | 0.05829319  | RAD2      |
| YKR031C   | 145.924926  | 140.842921 | 151.495879 | 164.495882 | 165.172088  | 160.173998 | 0.160597241 | 7.27427418 | 0.051895043 | SPO14     |
| YAL011W   | 42.9423058  | 43.1680389 | 41.4601187 | 53.0383919 | 46.7173125  | 42.7388903 | 0.160495262 | 5.49639329 | 0.113676763 | SWC3      |
| YLL008W   | 199.191798  | 178.024992 | 201.248022 | 219.249005 | 218.209595  | 208.981553 | 0.160484194 | 7.6742855  | 0.076498389 | DRS1      |
| YNL166C   | 56.4234278  | 56.636467  | 53.9284172 | 65.3962781 | 63.3974129  | 57.7814303 | 0.16039244  | 5.88388699 | 0.069885011 | BNI5      |
| YPR161C   | 71.3513044  | 71.140928  | 69.1203731 | 78.9367371 | 78.8395371  | 78.6989536 | 0.160306902 | 6.22495485 | 0.04558814  | SGV1      |
| YDL142C   | 21.306749   | 24.3467739 | 25.2392256 | 24.6566437 | 27.1703198  | 26.926696  | 0.160229859 | 4.65300499 | 0.171086387 | CRD1      |
| YBL088C   | 133.035658  | 121.388525 | 122.988265 | 130.733427 | 143.800709  | 147.197387 | 0.160207007 | 7.05845801 | 0.066633016 | TEL1      |
| YOL128C   | 25.7785358  | 27.9153318 | 27.3576258 | 29.8008356 | 29.1901757  | 31.6345261 | 0.160175906 | 4.84480937 | 0.127427541 | YGK3      |
| YFL010W-A | 26.5676746  | 31.080988  | 28.4470888 | 42.2178504 | 31.0797184  | 22.8543311 | 0.160054336 | 4.93237556 | 0.360884409 | AUA1      |
| YLR288C   | 17.16377    | 20.317757  | 18.0971905 | 20.5176388 | 21.1759087  | 20.4656016 | 0.159670971 | 4.30386646 | 0.196612589 | MEC3      |
| YPL182C   | 5.85277981  | 6.2161976  | 6.17362352 | 6.14937877 | 7.5581705   | 6.71426676 | 0.1596608   | 2.71407208 | 0.360831565 | YPL182C   |
| YPR059C   | 9.20661992  | 9.55452593 | 9.55452593 | 10.7130526 | 10.7130526  | 11.5327257 | 0.159480623 | 3.39573993 | 0.295738163 | YPR059C   |
| YMR090W   | 15.6512539  | 17.5550025 | 15.2524816 | 20.813282  | 17.85292    | 15.4299015 | 0.159375295 | 4.10693435 | 0.281304953 | YMR090W   |
| YGR191W   | 291.389521  | 238.057345 | 294.155003 | 281.511465 | 294.833806  | 343.396008 | 0.159343657 | 8.18315044 | 0.15065109  | HIP1      |
| YOL113W   | 36.2346255  | 43.5133832 | 41.5206445 | 47.3029136 | 43.8504202  | 44.3528967 | 0.159274017 | 5.42400939 | 0.11003374  | SKM1      |
| YJR114W   | 10.4560898  | 9.20918162 | 10.0472697 | 11.3526993 | 9.96896627  | 11.8145271 | 0.159167567 | 3.40493982 | 0.316539838 | YJR114W   |
| YPL043W   | 154.210884  | 147.92248  | 151.495879 | 182.116217 | 161.849099  | 162.433607 | 0.159083845 | 7.32309465 | 0.070128107 | NOP4      |
| YDR176W   | 58.5277981  | 61.0108283 | 57.4294348 | 68.4709674 | 62.2245934  | 66.9489868 | 0.15895257  | 5.96747388 | 0.064185043 | NGG1      |
| YMR191W   | 89.1069285  | 70.9106985 | 88.6096552 | 82.9574847 | 92.1314922  | 102.457128 | 0.158946309 | 6.45594517 | 0.14338356  | SPG5      |
| YBR225W   | 51.7543563  | 55.888221  | 52.1126456 | 57.0591395 | 59.553171   | 61.8487265 | 0.158910378 | 5.8198965  | 0.068686555 | YBR225W   |
| YKR011C   | 31.1709846  | 37.9878742 | 28.5076145 | 40.8578916 | 35.51037    | 32.6674902 | 0.158711052 | 5.1124383  | 0.21266719  | YKR011C   |
| YLR318W   | 25.2524432  | 33.7286277 | 25.1786999 | 29.7417069 | 32.2525379  | 32.0864479 | 0.158696707 | 4.89910461 | 0.212785951 | EST2      |
| YJL058C   | 17.4268163  | 17.1521008 | 16.3419446 | 14.4273887 | 19.5469927  | 22.9188913 | 0.158326413 | 4.17528139 | 0.339210982 | BIT61     |
| YBR170C   | 64.6436242  | 62.9677793 | 63.8546354 | 71.5456568 | 68.8705709  | 73.2113317 | 0.158218219 | 6.07966137 | 0.055213808 | NPL4      |
| YIL154C   | 86.3449425  | 66.3061077 | 77.8966027 | 94.9605991 | 82.5534657  | 79.5382369 | 0.158190799 | 6.34657512 | 0.142703639 | IMP2      |
| YNR002C   | 9.53542778  | 8.00047653 | 8.71570379 | 8.10062396 | 10.0992796  | 11.1043642 | 0.158175512 | 3.22663849 | 0.372866273 | ATO2      |
| YPL155C   | 49.8472707  | 47.1970558 | 48.4811024 | 56.7043677 | 53.7542299  | 51.7773263 | 0.157614793 | 5.68408155 | 0.07699762  | KIP2      |
| YLR232W   | 15.9800617  | 14.2742315 | 17.128779  | 15.9647333 | 15.8330641  | 21.0466439 | 0.157194753 | 4.07149873 | 0.309367482 | YLR232W   |
| YNL280C   | 148.884196  | 133.072674 | 149.801159 | 162.544637 | 162.174883  | 156.494064 | 0.156737153 | 7.25052636 | 0.068844669 | ERG24     |
| YDR379W   | 57.4756129  | 61.6439595 | 53.9889429 | 60.8433726 | 61.8988101  | 70.3061202 | 0.156648349 | 5.93412736 | 0.096406326 | RG24      |
| YDL231C   | 198.86299   | 163.808318 | 188.234992 | 190.867256 | 214.23504   | 208.916993 | 0.156618634 | 7.60176845 | 0.114184295 | BRE4      |
| YDL203C   | 53.9902497  | 54.7946307 | 55.1994574 | 56.645239  | 65.2869555  | 60.9448829 | 0.156586748 | 5.85603816 | 0.078288079 | ACK1      |
| YMR147W   | 18.4132398  | 15.6556088 | 16.2208932 | 17.5612067 | 19.0908962  | 19.3680772 | 0.156538614 | 4.15568847 | 0.231555015 | YMR147W   |
| YGL114W   | 140.072146  | 115.978131 | 126.377705 | 134.695047 | 148.035891  | 143.388331 | 0.156369772 | 7.07526615 | 0.091881789 | YGL114W   |
| YJL143W   | 104.889706  | 89.5017339 | 101.501634 | 123.933634 | 104.837037  | 100.778562 | 0.156261051 | 6.70546156 | 0.119252882 | TIM17     |
| YDR084C   | 57.0152819  | 50.8807285 | 57.3178576 | 57.0591395 | 60.32033842 | 66.3033842 | 0.156137177 | 5.86595119 | 0.09878993  | TVP23     |
| YIL003W   | 21.4382721  | 24.5194461 | 21.0629508 | 25.4844447 | 26.1278135  | 23.1125721 | 0.156069328 | 4.57003715 | 0.192108941 | CFD1      |
| YPL005W   | 16.1115849  | 20.6055439 | 17.8550876 | 19.4533232 | 22.2835717  | 19.1743964 | 0.156059631 | 4.27624336 | 0.253006771 | AEP3      |
| YAL045C   | 6.3131108   | 5.98596805 | 4.90258338 | 6.50415062 | 5.66862788  | 6.97250778 | 0.156044148 | 2.6270372  | 0.409148841 | YAL045C   |
| YNL161W   | 94.8939468  | 98.9411451 | 94.299073  | 97.621388  | 106.009857  | 117.499668 | 0.155907863 | 6.66754884 | 0.082095468 | CBK1      |
| YDR360W   | 3.81417111  | 2.93542664 | 2.36050311 | 3.37033259 | 2.99720554  | 3.74449492 | 0.155761802 | 1.73042096 | 0.556699815 | OPI7      |
| YDR128W   | 124.618177  | 116.66882  | 125.409293 | 131.5021   | 139.435214  | 137.513348 | 0.15561209  | 7.01458951 | 0.059078419 | MTG5      |
| YBL082C   | 112.057717  | 91.2284554 | 115.785704 | 118.789442 | 120.148848  | 116.337584 | 0.155518686 | 6.81374101 | 0.110870593 | ALG3      |
| YHR111W   | 44.3232988  | 48.6359904 | 46.5442793 | 52.2697195 | 50.3660845  | 52.8102904 | 0.155509094 | 5.62307746 | 0.080620067 | UBA4      |
| YDR110W   | 42.5477364  | 46.9668263 | 46.9679593 | 51.9149477 | 52.0601572  | 48.0973917 | 0.155455757 | 5.59159342 | 0.091002404 | FOB1      |
| YGL184C   | 5.58973352  | 6.50398452 | 4.29732618 | 6.20850741 | 5.8640978   | 6.1977847  | 0.155317212 | 2.56158344 | 0.429790599 | STR3      |
| YIL150C   | 221.550732  | 209.623997 | 220.737304 | 250.882828 | 247.660397  | 27.381226  | 0.155280979 | 7.84396979 | 0.082682141 | INO80     |
| YOR308C   | 39.4569425  | 34.2466442 | 37.1627926 | 42.3952363 | 43.0685405  | 37.896871  | 0.155243985 | 5.29094403 | 0.130105057 | SNU66     |
| YML092C   | 157.433201  | 155.577612 | 153.674805 | 185.545679 | 171.818066  | 162.110806 | 0.154826641 | 7.36181782 | 0.078639096 | PRE8      |
| YGL001C   | 117.121358  | 115.575229 | 118.085681 | 130.61517  | 131.160321  | 128.733153 | 0.154819437 | 6.95031104 | 0.051706148 | ERG26     |
| YBR255W   | 30.5791305  | 29.9298403 | 33.168095  | 33.8807119 | 33.881454   | 36.5411056 | 0.154785425 | 5.04934804 | 0.130673475 | MTG4      |
| YDL135C   | 31.7628387  | 42.0744485 | 32.3812606 | 40.3257339 | 39.3546119  | 38.6715941 | 0.154674894 | 5.23143191 | 0.187738232 | RD11      |
| YNL277W   | 43.7972062  | 35.570464  | 42.1259017 | 42.2178504 | 44.2413601  | 48.678434  | 0.154224276 | 5.42194551 | 0.149770079 | MET2      |
| YML093W   | 151.448898  | 136.238331 | 151.193251 | 173.483436 | 165.237245  | 149.821556 | 0.154148758 | 7.27275991 | 0.09114246  | UTP14     |
| YIL106W   | 47.0852847  | 57.0969261 | 53.6257886 | 58.7147415 | 58.9016046  | 58.1042315 | 0.153967861 | 5.80015523 | 0.101781424 | MOB1      |
| YKR090W   | 91.6058682  | 74.9972728 | 85.4623178 | 94.7832131 | 94.9332278  | 90.5780409 | 0.153940741 | 6.47301152 | 0.09364795  | PXL1      |
| YIL001W   | 14.5333072  | 18.3608059 | 13.4972357 | 18.5072649 | 15.9633774  | 17.1730284 | 0.15379635  | 4.04245513 | 0.308537738 | YIL001W   |
| YIL144W   | 43.3368752  | 43.2255962 | 41.399593  | 47.7168141 | 46.4566859  | 48.1619519 | 0.153715907 | 5.49725359 | 0.082599267 | NDC80     |
| YKR046C   | 144.543933  | 113.157819 | 137.030232 | 154.089241 | 138.848805  | 145.970742 | 0.153652494 | 7.11943674 | 0.127212885 | PET10     |

|           |            |            |            |            |            |            |             |            |             |           |
|-----------|------------|------------|------------|------------|------------|------------|-------------|------------|-------------|-----------|
| YOL032W   | 8.28595793 | 9.61208332 | 8.11044659 | 10.7022842 | 9.7083397  | 8.52195396 | 0.15357045  | 3.21579971 | 0.355182049 | OPI10     |
| YCL022C   | 4.80059467 | 2.99298403 | 3.32891464 | 6.26763605 | 2.73657898 | 3.29257312 | 0.153570192 | 2.01212272 | 0.641976992 | YCL022C   |
| YMR213W   | 20.3203254 | 20.8357734 | 21.0629508 | 23.4149422 | 23.7170178 | 22.079608  | 0.15345908  | 4.46124306 | 0.177471655 | CEF1      |
| YDR188W   | 495.776483 | 439.738422 | 475.126908 | 545.343465 | 523.338151 | 500.083753 | 0.153388893 | 8.95617812 | 0.098197782 | CCT6      |
| YGR175C   | 785.850772 | 615.173332 | 742.590068 | 811.008454 | 789.112094 | 783.374162 | 0.153120114 | 9.55960725 | 0.144264778 | ERG1      |
| YDR540C   | 2.69622441 | 2.87786926 | 2.78418316 | 2.9564321  | 3.19267547 | 3.16345261 | 0.153042564 | 1.61694871 | 0.521295167 | IRC4      |
| YOL096C   | 18.2817167 | 19.6270683 | 17.4314076 | 22.5871412 | 20.0030892 | 18.9161554 | 0.152974627 | 4.29327537 | 0.234466034 | COQ3      |
| YDL164C   | 121.39586  | 114.25141  | 122.927739 | 143.800857 | 125.947789 | 128.797713 | 0.152938939 | 6.98084223 | 0.079962455 | CDG9      |
| YGR217W   | 114.556656 | 104.811998 | 113.364675 | 115.537366 | 134.157526 | 120.211199 | 0.152765149 | 6.87296037 | 0.085407408 | CCH1      |
| YGR018C   | 9.27238149 | 9.43941116 | 7.98939514 | 17.6203353 | 7.42785722 | 4.58377827 | 0.152499352 | 3.25735666 | 0.675711753 | YGR018C   |
| YER019W   | 136.06069  | 112.409573 | 137.272335 | 133.039445 | 139.826154 | 155.783901 | 0.152331169 | 7.08566027 | 0.130578325 | ISC1      |
| YKR025W   | 36.5634334 | 36.9518413 | 43.578519  | 43.932581  | 44.2413601 | 41.9641672 | 0.152163373 | 5.36906195 | 0.134788563 | RPC37     |
| YHR182C-A | 59.9745526 | 51.5714171 | 61.4941323 | 64.3319625 | 65.0914856 | 62.7525701 | 0.152025744 | 5.93024758 | 0.101952215 | YHR182C-A |
| YKL182W   | 2420.15733 | 2005.12663 | 2370.55038 | 2347.58447 | 2625.87784 | 2576.85811 | 0.151896212 | 11.2234714 | 0.142857018 | FAS1      |
| YNR063W   | 9.60118935 | 10.763231  | 9.50253816 | 12.4170148 | 10.0341229 | 10.7170027 | 0.151787428 | 3.41151154 | 0.349010086 | YNR063W   |
| YER143W   | 44.2575372 | 45.0674326 | 41.3390673 | 51.5601758 | 47.9552887 | 45.5795416 | 0.151654124 | 5.52626417 | 0.107417166 | DDI1      |
| YMR207C   | 108.177784 | 92.2644884 | 105.556857 | 115.359981 | 111.417858 | 112.98045  | 0.151566767 | 6.75135707 | 0.084685303 | HFA1      |
| YHR198C   | 52.0831641 | 49.2115643 | 53.6863143 | 55.3444089 | 56.9469053 | 59.8473585 | 0.151477397 | 5.77167692 | 0.086766349 | AIM18     |
| YLR370C   | 100.87825  | 76.7239944 | 89.3964896 | 91.2946233 | 104.771881 | 100.32664  | 0.151147972 | 6.554401   | 0.148903477 | ARC18     |
| YOL034W   | 50.2418401 | 47.0243837 | 53.8678915 | 55.994824  | 53.8193865 | 57.975111  | 0.151136208 | 5.73525918 | 0.098894765 | SMC5      |
| YDR200C   | 38.9966115 | 37.2396282 | 35.4680724 | 39.143161  | 43.2640105 | 41.6413659 | 0.151095919 | 5.30017675 | 0.119017376 | VPS64     |
| YDL156W   | 27.2910519 | 24.6345608 | 23.5445054 | 28.0269763 | 27.6264163 | 28.0837119 | 0.151068795 | 4.73589604 | 0.172662934 | CMR1      |
| YDR093W   | 345.905863 | 292.391517 | 348.264997 | 368.194054 | 370.089728 | 357.082783 | 0.151066292 | 8.43918937 | 0.118156708 | DNF2      |
| YAL013W   | 60.0403142 | 49.1540069 | 55.1389316 | 63.4450329 | 63.2670996 | 55.5863815 | 0.150878795 | 5.85501738 | 0.133720583 | DEP1      |
| YPR112C   | 131.194334 | 131.40351  | 143.385433 | 152.137996 | 150.446687 | 148.10123  | 0.150686525 | 7.15885862 | 0.071243824 | MRD1      |
| YKL053W   | 19.8599944 | 20.02997   | 18.641922  | 24.2427432 | 21.4365353 | 19.2389567 | 0.150656113 | 4.37193045 | 0.240997979 | PRM8      |
| YIR035C   | 38.6020421 | 36.8942839 | 36.3759582 | 44.760382  | 40.3971182 | 38.9298351 | 0.150651235 | 5.30198415 | 0.127829704 | YIR035C   |
| YJR036C   | 14.0072146 | 17.6701172 | 15.7972131 | 18.7437795 | 19.0257395 | 14.9779797 | 0.150641648 | 4.07393466 | 0.319311551 | HUL4      |
| YPL119C   | 20.0572791 | 14.8498054 | 17.9761391 | 18.7437795 | 19.7424626 | 20.1428003 | 0.150626832 | 4.22381599 | 0.289512987 | DBP1      |
| YKL023W   | 19.2681403 | 21.1811177 | 20.6392708 | 25.6618306 | 22.6745115 | 19.4326374 | 0.150206928 | 4.4338886  | 0.254988161 | YKL023W   |
| YMR165C   | 69.1811726 | 61.1835004 | 71.6624534 | 68.057067  | 74.5391987 | 81.6041652 | 0.150196227 | 6.15258253 | 0.123397861 | PAH1      |
| YBR183W   | 24.7921122 | 24.058987  | 26.5707914 | 29.7417069 | 28.0825128 | 25.8241029 | 0.15013484  | 4.73533697 | 0.182690026 | YPC1      |
| YJR107W   | 32.1574082 | 25.7857085 | 30.3839118 | 32.3433672 | 32.969261  | 32.6029299 | 0.150112124 | 4.96094491 | 0.180535771 | YJR107W   |
| YGR173W   | 64.1832932 | 67.9177145 | 65.6098813 | 79.0549944 | 71.4116799 | 68.8857945 | 0.150090409 | 6.1218996  | 0.088204357 | RBG2      |
| YML013W   | 94.1048079 | 82.4221755 | 89.7596439 | 94.3693126 | 99.5593494 | 101.488724 | 0.15008079  | 6.55031024 | 0.081692188 | UBX2      |
| YOL081W   | 256.009795 | 224.761589 | 262.80268  | 253.129716 | 288.643925 | 283.290409 | 0.150033942 | 8.03088503 | 0.127643683 | IRA2      |
| YOL010W   | 67.9974643 | 80.9832409 | 75.7782024 | 75.4481472 | 82.6186224 | 91.4818845 | 0.149840833 | 6.30693959 | 0.126191831 | RCL1      |
| YLR079W   | 63.6572006 | 63.370681  | 63.9756869 | 70.5995986 | 71.2813666 | 69.9833189 | 0.149533982 | 6.07174637 | 0.065963253 | SIC1      |
| YFR029W   | 33.4726396 | 36.31871   | 33.7128265 | 35.0632847 | 41.0486846 | 38.8007146 | 0.149381372 | 5.19054177 | 0.142585271 | PTR3      |
| YOL146W   | 16.5061543 | 24.7496756 | 17.7340362 | 25.2479301 | 21.4365353 | 18.7870349 | 0.149348293 | 4.38548    | 0.372172413 | PSF3      |
| YBR021W   | 54.5163422 | 47.4848427 | 56.8941775 | 57.9460692 | 55.0573627 | 63.1399316 | 0.149210664 | 5.80606876 | 0.131442484 | FUR4      |
| YLL023C   | 87.9889818 | 73.3856661 | 88.7307067 | 82.3661983 | 96.171204  | 98.7771936 | 0.149040195 | 6.45939467 | 0.144297261 | POM33     |
| YJL152W   | 31.1709846 | 23.6560853 | 27.1760486 | 30.2738647 | 32.1873813 | 28.3419529 | 0.148819665 | 4.85310794 | 0.228122782 | YJL152W   |
| YLR389C   | 226.285565 | 194.486404 | 215.168937 | 217.593403 | 235.345792 | 252.043244 | 0.148767153 | 7.80468336 | 0.125991358 | STE23     |
| YOL044W   | 12.9550295 | 19.6846257 | 17.4314076 | 14.7821605 | 18.8954263 | 21.9504875 | 0.148459    | 4.1491793  | 0.414438013 | PEX15     |
| YBR006W   | 35.3139636 | 31.3112175 | 32.7444149 | 37.7832022 | 34.2723938 | 37.9614313 | 0.148167774 | 5.129803   | 0.147959191 | UGA2      |
| YBR255C-A | 8.02291165 | 8.57605039 | 6.83940645 | 9.04668223 | 7.94911036 | 8.97387576 | 0.148165514 | 3.06363262 | 0.381120337 | YBR255C-A |
| YAL029C   | 259.95549  | 222.804638 | 258.747456 | 258.333037 | 284.08296  | 279.223113 | 0.148115548 | 8.02583132 | 0.125303598 | MYO4      |
| YMR063W   | 11.3767518 | 10.7056736 | 13.4972357 | 11.7665998 | 13.6177382 | 14.0741361 | 0.148107906 | 3.6573784  | 0.339268485 | RIM9      |
| YKL215C   | 122.711091 | 119.08623  | 122.383007 | 135.877619 | 137.024419 | 130.54084  | 0.147832825 | 7.00061728 | 0.067204355 | OXF1      |
| YBR231C   | 25.3182048 | 22.1020359 | 24.936597  | 27.7313331 | 26.9748499 | 25.3721811 | 0.14774023  | 4.67363028 | 0.196987614 | SWC5      |
| YKR092C   | 321.902889 | 277.196367 | 335.07039  | 352.820607 | 333.602008 | 348.302588 | 0.147631536 | 8.35869939 | 0.129060419 | SRP40     |
| YOL005C   | 35.7742946 | 38.9087924 | 31.7154777 | 49.0767729 | 37.0741294 | 31.6345261 | 0.147569281 | 5.22931794 | 0.311859847 | RPB11     |
| YJL112W   | 57.2125667 | 61.6439595 | 61.554658  | 66.4605936 | 67.8932212 | 65.5286611 | 0.147298949 | 5.98883693 | 0.079777082 | MDV1      |
| YMR294W   | 7.82562693 | 9.32429639 | 8.04992087 | 9.57884001 | 9.57802641 | 8.78019499 | 0.146925952 | 3.16769145 | 0.362173661 | JNM1      |
| YKR022C   | 16.3088696 | 17.3247729 | 15.3130074 | 20.1628669 | 18.8302696 | 15.1716605 | 0.146822709 | 4.11414325 | 0.313687229 | NTR2      |
| YLR110C   | 7440.19837 | 5973.24787 | 7350.00143 | 7212.03872 | 7386.02665 | 8387.34582 | 0.146676454 | 12.8320139 | 0.186675553 | CCW12     |
| YMR159C   | 1.44675456 | 1.72672155 | 1.63419446 | 1.8329879  | 1.75922934 | 1.74312695 | 0.146569011 | 0.86130993 | 0.653897699 | ATG16     |
| YOR358W   | 17.8871473 | 14.2742315 | 14.526173  | 17.8568499 | 18.1787032 | 15.59022   | 0.146550413 | 4.0434682  | 0.316198939 | HAP5      |
| YBR149W   | 164.206642 | 190.342273 | 165.537846 | 208.014563 | 183.350791 | 184.319534 | 0.146468254 | 7.51387362 | 0.131909073 | ARA1      |
| YGR038W   | 82.4650099 | 67.2845832 | 80.3176315 | 90.7624655 | 81.1851763 | 82.434485  | 0.14603012  | 6.33729072 | 0.133022175 | ORM1      |
| YKL027W   | 48.2032314 | 55.8306636 | 48.2389995 | 61.612045  | 53.4284467 | 53.455893  | 0.145971216 | 5.74419636 | 0.144525741 | TCO2      |
| YMR002W   | 145.990687 | 174.283762 | 137.090758 | 181.288416 | 166.410064 | 158.366311 | 0.145857365 | 7.32832998 | 0.158888205 | MIX17     |
| YIL002C   | 98.0505022 | 89.7895208 | 88.9122838 | 107.436743 | 100.471542 | 98.131591  | 0.145788279 | 6.60361936 | 0.088130321 | INP51     |
| YLR046C   | 27.2252903 | 27.2822006 | 27.1155229 | 29.8008356 | 30.232682  | 30.2787607 | 0.145767218 | 4.8467264  | 0.150585387 | YLR046C   |
| YOL058W   | 134.153605 | 105.675359 | 128.677682 | 88.9886062 | 133.245333 | 185.481619 | 0.145742983 | 7.01606439 | 0.440851159 | SML1      |
| YDL125C   | 11.1137055 | 11.3388049 | 12.7709271 | 10.8205415 | 13.8783648 | 14.3323771 | 0.145666558 | 3.64218369 | 0.364686764 | ECM18     |
| YOR034C   | 73.0611052 | 59.5718936 | 68.3940645 | 66.1649504 | 77.6015609 | 78.5698331 | 0.145570224 | 6.14267866 | 0.154988552 | AKR2      |
| YMR194C-B | 0.39456943 | 0.92091816 | 0.48420577 | 0.41390049 | 1.04250628 | 0.58104232 | 0.14545234  | -0.3883845 | 0.750444029 | CMC4      |
| YEL031W   | 1039.09858 | 849.028988 | 1035.1714  | 1047.58215 | 1105.12181 | 1080.54503 | 0.145423603 | 10.0030843 | 0.157453023 | SPF1      |
| YML071C   | 46.7564769 | 45.7581212 | 46.7863822 | 52.9792632 | 49.3887348 | 51.6482058 | 0.145342445 | 5.61494143 | 0.097768252 | COG8      |
| YBL019W   | 19.3339018 | 20.2026422 | 18.2787677 | 21.2863111 | 20.7849689 | 21.8859272 | 0.145287908 | 4.35172935 | 0.217665611 | APN2      |
| YDL102W   | 105.415798 | 101.24344  | 101.804262 | 118.375541 | 114.610534 | 108.073871 | 0.145278726 | 6.75987545 | 0.077243169 | POL3      |

|           |            |            |            |            |            |            |             |            |             |           |
|-----------|------------|------------|------------|------------|------------|------------|-------------|------------|-------------|-----------|
| YOR298C-A | 259.758205 | 276.275449 | 247.126518 | 352.22932  | 279.717465 | 234.095493 | 0.145267195 | 8.10337074 | 0.255929653 | MBF1      |
| YDR335W   | 252.327147 | 239.381165 | 249.426495 | 277.076816 | 274.048837 | 268.312429 | 0.144992275 | 8.02354278 | 0.095626574 | MSN5      |
| YLR260W   | 46.4934306 | 48.1755314 | 42.8522103 | 54.6348652 | 51.4737474 | 45.9023429 | 0.144952464 | 5.59645699 | 0.142780074 | LCB5      |
| YER082C   | 121.527383 | 118.165312 | 120.809339 | 132.448158 | 134.874249 | 131.251003 | 0.144903304 | 6.9844624  | 0.069765356 | UTP7      |
| YPR026W   | 67.0768023 | 56.4637948 | 66.0335614 | 70.1265694 | 69.8479205 | 69.4668368 | 0.144600921 | 6.05768323 | 0.115266965 | ATH1      |
| YAL020C   | 47.8744236 | 36.606497  | 44.5469305 | 54.8713798 | 44.0458902 | 43.5136134 | 0.144476646 | 5.50339966 | 0.24147389  | ATS1      |
| YDR368W   | 131.128572 | 136.238331 | 129.464517 | 149.77285  | 151.228567 | 137.513348 | 0.14406896  | 7.12255024 | 0.086953486 | YPR1      |
| YHR106W   | 36.8264797 | 39.0814645 | 36.7391125 | 41.5083067 | 39.6152385 | 43.3844929 | 0.144013297 | 5.30923263 | 0.129538922 | TRR2      |
| YDL115C   | 20.3203254 | 22.3322654 | 20.155065  | 24.8931583 | 22.9351381 | 21.5631259 | 0.143848878 | 4.47022714 | 0.23078827  | IWR1      |
| YPL080C   | 0.19728471 | 0.17267216 | 0.36315432 | 0.53215778 | 0.06515664 | 0.19368077 | 0.143696297 | -1.3889548 | 1           | YPL080C   |
| YLR372W   | 625.787108 | 504.663153 | 559.560289 | 621.382899 | 629.022224 | 616.356776 | 0.143608535 | 9.21163538 | 0.149624247 | ELO3      |
| YJL072C   | 14.5990687 | 16.5765269 | 16.6445732 | 18.9802941 | 17.3968235 | 16.4628656 | 0.143583946 | 4.07989106 | 0.283101587 | PSF2      |
| YLL067C   | 28.0801908 | 15.4829366 | 13.8603901 | 30.8060227 | 19.9379325 | 12.5892502 | 0.143492058 | 4.33936686 | 0.625518153 | YLL067C   |
| YKL142W   | 44.8493913 | 57.2695982 | 48.4205766 | 60.7251153 | 54.7967361 | 50.8089225 | 0.143346341 | 5.72678142 | 0.190903454 | MRP8      |
| YMR042W   | 19.5311865 | 14.792248  | 18.9445506 | 16.9107916 | 21.5668486 | 20.336481  | 0.14328863  | 4.23062817 | 0.344345491 | ARG80     |
| YBR069C   | 576.992023 | 517.671122 | 605.862465 | 565.15156  | 639.5776   | 673.169802 | 0.143121252 | 9.22038773 | 0.162381435 | TAT1      |
| YBR126C   | 320.193089 | 294.636255 | 287.012968 | 373.16086  | 327.477284 | 295.040376 | 0.143012699 | 8.30551067 | 0.167618707 | TPS1      |
| YJL127C   | 32.8807854 | 28.6060204 | 32.9259921 | 34.6493842 | 35.3800567 | 34.1523761 | 0.142966259 | 5.05355169 | 0.171650986 | SPT10     |
| YLR356W   | 33.0780701 | 26.4188398 | 32.6838892 | 34.5311269 | 29.6462722 | 37.5095095 | 0.142926573 | 5.01885064 | 0.256604458 | ATG33     |
| YNL088W   | 208.135372 | 194.083503 | 196.345438 | 225.575769 | 222.18415  | 212.984289 | 0.142764558 | 7.71424777 | 0.103011784 | TOP2      |
| YLR074C   | 48.4005162 | 42.3046781 | 46.181125  | 50.7915035 | 51.9298439 | 48.2910724 | 0.142616843 | 5.58778184 | 0.126664967 | BUD20     |
| YMR202W   | 382.469296 | 307.816896 | 360.975399 | 382.798828 | 374.91132  | 402.597764 | 0.142535185 | 8.52628912 | 0.156225447 | ERG2      |
| YLR365W   | 0.26304628 | 0.4029017  | 0.12105144 | 0.41390049 | 0.32578321 | 0.12912051 | 0.142476938 | -1.3128146 | 1           | YLR365W   |
| YGL093W   | 69.3784573 | 61.9893038 | 61.3125552 | 74.9159894 | 73.3663792 | 64.237456  | 0.142295435 | 6.07999633 | 0.13256006  | SPC105    |
| YDL054C   | 72.5350127 | 55.888221  | 62.7651725 | 64.6867344 | 70.2388604 | 75.9874228 | 0.142276267 | 6.0684124  | 0.182308948 | MCH1      |
| YFL039C   | 3221.13326 | 2355.01797 | 2801.13036 | 3173.72986 | 3041.77269 | 3029.74831 | 0.142255975 | 11.5202185 | 0.2133484   | ACT1      |
| YML034C-A | 5.32668724 | 5.52550897 | 4.23680046 | 4.43464815 | 5.8640978  | 6.39146547 | 0.142056899 | 2.4351615  | 0.497488449 | YML034C-A |
| YER152C   | 146.385257 | 122.712345 | 140.903878 | 160.829906 | 149.404181 | 141.903445 | 0.141682468 | 7.16795691 | 0.133562109 | YER152C   |
| YOL045W   | 96.0118935 | 97.6748826 | 103.377931 | 101.109978 | 114.740847 | 111.947486 | 0.141547913 | 6.70398819 | 0.098489656 | PSK2      |
| YAL014C   | 51.2940253 | 45.2976621 | 43.2758904 | 56.0539526 | 48.4113852 | 49.6468378 | 0.141420533 | 5.61811157 | 0.165742705 | SYN8      |
| YGL253W   | 1729.20051 | 1552.78314 | 1613.73677 | 1920.85306 | 1768.74221 | 1709.49105 | 0.14122902  | 10.7447654 | 0.140505611 | HXK2      |
| YKR036C   | 56.2261431 | 53.0103517 | 55.8652403 | 61.1981445 | 60.0092675 | 60.8157623 | 0.141211331 | 5.8572492  | 0.094870552 | CAF4      |
| YGL022W   | 705.490132 | 588.063804 | 724.069198 | 746.144334 | 742.916035 | 735.922373 | 0.141200135 | 9.46599035 | 0.161728485 | STT3      |
| YER149C   | 27.4883366 | 28.9513647 | 30.4444376 | 27.4356899 | 34.8588036 | 33.635894  | 0.141150672 | 4.93444556 | 0.228789947 | PEA2      |
| YNL164C   | 20.4518485 | 22.8502819 | 21.1234766 | 24.9522869 | 22.9351381 | 23.1771324 | 0.14109671  | 4.5054682  | 0.223332165 | IBD2      |
| YHL019C   | 27.2252903 | 32.7501521 | 29.2944489 | 33.2302968 | 31.2751883 | 34.0232556 | 0.141090611 | 4.97421066 | 0.193377253 | APM2      |
| YOL024C   | 61.1582609 | 64.406714  | 60.2230922 | 66.9336228 | 74.0831023 | 63.9146547 | 0.141023724 | 6.02766995 | 0.121604838 | UBR2      |
| YFL025C   | 103.048382 | 97.0993087 | 103.135828 | 107.200228 | 111.548172 | 115.562861 | 0.140542631 | 6.73303585 | 0.086462411 | BST1      |
| YNL142W   | 44.7836298 | 42.7651372 | 46.4232278 | 49.9045739 | 46.7824691 | 50.938043  | 0.140418505 | 5.55618096 | 0.123172869 | MEP2      |
| YKL145W   | 219.446362 | 223.149982 | 228.84775  | 267.024947 | 235.736732 | 237.258945 | 0.140414879 | 7.8788171  | 0.124481577 | RPT1      |
| YJR089W   | 51.5570716 | 49.1540069 | 46.3627021 | 56.1130813 | 52.5162537 | 53.3913328 | 0.140406283 | 5.69027778 | 0.120195155 | BIR1      |
| YPR103W   | 161.378895 | 191.72365  | 160.030006 | 205.05813  | 186.152527 | 174.377255 | 0.140333425 | 7.49128031 | 0.169086995 | PRE2      |
| YNR048W   | 27.9486676 | 30.044955  | 31.2917977 | 32.698139  | 32.7086344 | 33.0548517 | 0.140318635 | 4.97343358 | 0.165900154 | YNR048W   |
| YMR172W   | 48.0717083 | 44.088957  | 45.5758678 | 51.3236613 | 49.6493614 | 50.7443622 | 0.140279066 | 5.5956605  | 0.115158893 | HOT1      |
| YDR379C-A | 7.62834222 | 7.48246007 | 6.05257208 | 8.75103902 | 7.75364043 | 6.77882701 | 0.140154712 | 2.91349853 | 0.445826418 | SDH6      |
| YCR088W   | 358.532084 | 321.400439 | 354.378095 | 402.784309 | 377.713055 | 359.148711 | 0.140071294 | 8.50161435 | 0.133971382 | ABP1      |
| YOR279C   | 9.79847406 | 10.014985  | 9.92621821 | 12.1805003 | 10.1644362 | 10.3942014 | 0.140061565 | 3.39829226 | 0.367830141 | RFM1      |
| YDR504C   | 3.48536326 | 4.20168912 | 2.72365744 | 2.89730346 | 3.90939854 | 4.71289878 | 0.139859901 | 1.91528793 | 0.596763157 | SPG3      |
| YDR369C   | 22.1616494 | 26.1310529 | 23.6655668 | 26.7261462 | 26.3232835 | 26.2760247 | 0.139269939 | 4.66363518 | 0.218148311 | XRS2      |
| YLR430W   | 291.389521 | 248.935691 | 285.923505 | 288.074744 | 315.618775 | 306.144474 | 0.139114717 | 8.17716426 | 0.146250374 | SEN1      |
| YKL073W   | 204.058154 | 179.17614  | 203.426948 | 225.694027 | 210.390798 | 209.820836 | 0.139080603 | 7.68329938 | 0.13355881  | LHS1      |
| YKL201C   | 109.756062 | 99.228932  | 107.312103 | 118.079898 | 116.500076 | 113.561493 | 0.138821599 | 6.79251053 | 0.094342441 | MNN4      |
| YNL063W   | 16.6376774 | 19.1090519 | 18.8234992 | 20.9906679 | 21.2410654 | 17.8831913 | 0.138742269 | 4.26651652 | 0.294864528 | MTQ1      |
| YMR044W   | 45.3754839 | 47.7150723 | 51.9310684 | 55.9356953 | 53.2981334 | 50.4215609 | 0.138637422 | 5.6698532  | 0.139546947 | IOC4      |
| YIL068C   | 60.5664068 | 59.5143362 | 57.015229  | 66.2832077 | 65.6127388 | 63.0108111 | 0.13856758  | 5.95698369 | 0.098584376 | SEC6      |
| YPR097W   | 117.581689 | 120.007148 | 115.84623  | 133.571602 | 131.095164 | 124.343055 | 0.138419578 | 6.95261811 | 0.089165169 | YPR097W   |
| YLL015W   | 233.322053 | 202.717111 | 242.466038 | 256.559178 | 245.184445 | 244.941616 | 0.138341607 | 7.89266565 | 0.147531525 | BPT1      |
| YML065W   | 66.5507097 | 63.4857958 | 65.5493556 | 74.3838316 | 69.7176072 | 71.0808432 | 0.13831348  | 6.09975087 | 0.097658067 | ORC1      |
| YOR247W   | 649.066704 | 543.571945 | 666.630289 | 563.614216 | 700.303591 | 782.405758 | 0.138279193 | 9.34655289 | 0.26817091  | SRL1      |
| YDR506C   | 30.1187995 | 26.0159381 | 25.7839571 | 29.3869351 | 29.7765855 | 30.9243632 | 0.138262994 | 4.84674841 | 0.210783321 | GMC1      |
| YMR181C   | 16.1115849 | 11.6265918 | 14.4656473 | 13.5995877 | 15.8330641 | 16.9793477 | 0.1382381   | 3.89369609 | 0.399637107 | YMR181C   |
| YMR197C   | 18.6762861 | 21.4113473 | 19.0050763 | 24.5383864 | 21.2410654 | 19.2389567 | 0.138107527 | 4.38023223 | 0.298019998 | VTI1      |
| YOR290C   | 240.29278  | 212.501866 | 247.368621 | 251.178471 | 260.952352 | 258.241029 | 0.137960259 | 7.93779858 | 0.137255832 | SNF2      |
| YNL335W   | 4.47178682 | 3.79878742 | 4.41837762 | 4.61203408 | 3.58361532 | 5.7458629  | 0.137846583 | 2.18800831 | 0.535882787 | DDI3      |
| YLR384C   | 388.979692 | 360.309231 | 380.162052 | 427.795725 | 412.376389 | 402.404084 | 0.137814628 | 8.62736866 | 0.121239595 | IKI3      |
| YOR110W   | 47.4798542 | 41.7866616 | 43.4574675 | 52.033205  | 44.1762035 | 49.6468378 | 0.137544161 | 5.5406615  | 0.16941416  | TFC7      |
| YNR032W   | 46.7564769 | 37.815202  | 42.2469531 | 48.6037437 | 45.0883964 | 45.6441019 | 0.137470393 | 5.4747285  | 0.181881422 | PGP1      |
| YMR224C   | 36.2346255 | 33.6710703 | 34.6207123 | 40.798763  | 38.1166357 | 35.9600633 | 0.137427658 | 5.19724237 | 0.16785368  | MRE11     |
| YPL045W   | 49.3211781 | 52.2045483 | 48.1784738 | 58.7147415 | 53.6890732 | 52.2292481 | 0.137382895 | 5.71479719 | 0.13347813  | VPS16     |
| YMR226C   | 132.114996 | 171.636122 | 136.788129 | 172.123477 | 166.931317 | 145.58338  | 0.137360379 | 7.26998714 | 0.211732852 | YMR226C   |
| YHR080C   | 123.171422 | 104.754441 | 119.417247 | 126.653551 | 126.143259 | 129.120515 | 0.13733544  | 6.92659765 | 0.118880907 | YHR080C   |
| YJL123C   | 119.159966 | 113.906065 | 124.501408 | 141.140068 | 125.035597 | 126.990026 | 0.137313695 | 6.96864517 | 0.114731255 | MTC1      |
| YHL017W   | 128.95844  | 114.596754 | 127.406642 | 124.465791 | 144.126493 | 139.385595 | 0.137203899 | 7.0215206  | 0.131374997 | YHL017W   |



|           |            |            |            |            |            |            |             |            |             |           |
|-----------|------------|------------|------------|------------|------------|------------|-------------|------------|-------------|-----------|
| YLR273C   | 16.1773464 | 19.7997405 | 19.0050763 | 18.7437795 | 20.1334025 | 21.6922464 | 0.137075737 | 4.27686086 | 0.302122847 | PIG1      |
| YMR219W   | 101.272819 | 89.9046356 | 100.654274 | 101.760393 | 112.786148 | 106.330744 | 0.13702638  | 6.67557704 | 0.116213137 | ESC1      |
| YPL109C   | 17.8213857 | 18.0730189 | 19.0050763 | 21.8184689 | 18.1135465 | 20.4010413 | 0.136968738 | 4.27316295 | 0.2876049   | YPL109C   |
| YDR264C   | 293.296606 | 264.36107  | 316.791623 | 313.559189 | 309.624364 | 338.295748 | 0.136931463 | 8.25785393 | 0.157577908 | AKR1      |
| YHR034C   | 19.0708556 | 18.5910354 | 19.9734879 | 19.8672237 | 23.6518611 | 19.8845592 | 0.136872994 | 4.34243191 | 0.276090903 | PIH1      |
| YOR294W   | 46.0330996 | 54.7946307 | 51.4468627 | 59.3060279 | 54.5361096 | 53.6495738 | 0.136834384 | 5.73966779 | 0.154816303 | RRS1      |
| YML007W   | 120.738244 | 138.137724 | 124.440882 | 143.800857 | 140.021624 | 137.642468 | 0.136580898 | 7.06890947 | 0.113701091 | YAP1      |
| YHR074W   | 276.921975 | 228.963278 | 265.526337 | 286.478271 | 279.782622 | 281.611842 | 0.136567251 | 8.07674711 | 0.156726617 | YNS1      |
| YMR293C   | 24.1344965 | 26.6490693 | 26.9339458 | 27.9678477 | 28.7340792 | 28.7938747 | 0.136379041 | 4.77226835 | 0.204328133 | HER2      |
| YBL025W   | 5.98430295 | 8.05803392 | 7.38413794 | 9.22406815 | 7.94911036 | 6.39146547 | 0.136255489 | 2.93395866 | 0.498629709 | RRN10     |
| YHR021W-A | 3.09079383 | 2.53252495 | 3.14733748 | 3.01556074 | 2.86689226 | 3.74449492 | 0.135965256 | 1.67043137 | 0.579524379 | ECM12     |
| YCR106W   | 36.5634334 | 36.2611526 | 35.2259695 | 35.8319571 | 43.1336972 | 39.8336787 | 0.135959241 | 5.24476003 | 0.183999905 | RDS1      |
| YLR041W   | 4.40602525 | 2.99298403 | 4.23680046 | 3.25207531 | 4.56096496 | 4.97113981 | 0.135950917 | 2.06093172 | 0.573649259 | YLR041W   |
| YFR016C   | 148.029296 | 118.395541 | 126.377705 | 173.897336 | 133.571117 | 123.891134 | 0.135752188 | 7.10313859 | 0.277226385 | YFR016C   |
| YDR322C-A | 27.2910519 | 34.5344311 | 23.1208253 | 39.5570615 | 30.4281519 | 23.3062529 | 0.1355381   | 4.90042128 | 0.455804644 | TIM11     |
| YMR088C   | 148.423865 | 116.783934 | 148.953799 | 140.962683 | 154.030302 | 159.786637 | 0.135184892 | 7.1790956  | 0.196961728 | VBA1      |
| YLR080W   | 10.5218513 | 10.2452146 | 9.38148672 | 13.0083012 | 9.90380962 | 10.1359604 | 0.135162408 | 3.41479612 | 0.430842588 | EMP46     |
| YGL102C   | 158.682671 | 238.863148 | 169.472018 | 256.91395  | 212.150027 | 153.653412 | 0.13512433  | 7.63275459 | 0.43611598  | YGL102C   |
| YDR433W   | 24.3317812 | 20.1450848 | 22.333991  | 32.6390104 | 21.1107521 | 19.4971977 | 0.135103526 | 4.55355088 | 0.448774131 | YDR433W   |
| YLR030C   | 384.902474 | 311.90347  | 372.293709 | 362.990733 | 400.843663 | 410.151314 | 0.135088938 | 8.54667119 | 0.191539165 | SSM4      |
| YER041W   | 30.7106536 | 33.4408408 | 34.1970322 | 34.7085129 | 38.0514791 | 35.3144607 | 0.134812318 | 5.10960531 | 0.179812378 | YEN1      |
| YNR067C   | 394.832471 | 355.416853 | 411.695953 | 395.097586 | 438.178419 | 442.302323 | 0.13460286  | 8.6666051  | 0.163012251 | DSE4      |
| YIR029W   | 9.99575877 | 10.014985  | 8.59465235 | 11.5892138 | 9.05677327 | 10.7170027 | 0.134545676 | 3.33957113 | 0.421337981 | DAL2      |
| YLL052C   | 5.1951641  | 3.51100049 | 5.14468627 | 4.78942    | 5.40800131 | 4.97113981 | 0.1344685   | 2.30604308 | 0.548967298 | AQY2      |
| YGL257C   | 99.4972567 | 102.279473 | 92.1806728 | 112.34442  | 105.74923  | 104.458496 | 0.134091075 | 6.68477742 | 0.111228418 | MNT2      |
| YNL304W   | 19.2681403 | 16.8067565 | 16.8261504 | 23.2375563 | 17.85292   | 16.8502271 | 0.134043669 | 4.21746935 | 0.377468465 | YPT11     |
| YKL147C   | 5.85277981 | 4.2592465  | 6.05257208 | 4.0798763  | 5.14737474 | 8.52195396 | 0.134026573 | 2.52357097 | 0.626223713 | YKL147C   |
| YOR223W   | 25.1209201 | 22.562495  | 23.3629282 | 30.0964788 | 25.3459338 | 22.4024093 | 0.133946368 | 4.64057258 | 0.307414332 | DSC3      |
| YKL101W   | 346.234671 | 324.853882 | 347.780792 | 354.653595 | 392.894553 | 370.317636 | 0.133765877 | 8.47666774 | 0.138713928 | HSL1      |
| YEL023C   | 34.1960169 | 31.8867914 | 33.0470436 | 36.8962726 | 35.8361532 | 35.9600633 | 0.133671388 | 5.11911437 | 0.166804541 | YEL023C   |
| YPL074W   | 54.1217728 | 59.629451  | 61.3125552 | 63.1493897 | 66.1991485 | 62.8171303 | 0.133667094 | 5.93853141 | 0.127181989 | YTA6      |
| YJR130C   | 37.3525723 | 36.4913822 | 33.8338779 | 44.5238674 | 36.2924497 | 37.1867082 | 0.133438511 | 5.238196   | 0.223230928 | STR2      |
| YFL007W   | 303.358126 | 270.74994  | 292.883963 | 311.194043 | 325.718055 | 314.021091 | 0.133419395 | 8.2436278  | 0.138391955 | BLM10     |
| YLR044C   | 20500.4463 | 16026.6812 | 20573.1162 | 21128.2011 | 20839.8308 | 20650.5021 | 0.133095496 | 14.2843345 | 0.225535658 | PDC1      |
| YHR027C   | 623.090884 | 569.242539 | 608.162443 | 707.474202 | 660.492883 | 606.156255 | 0.13290335  | 9.29742983 | 0.166964062 | RPN1      |
| YMR301C   | 118.04202  | 105.387572 | 121.111967 | 123.992762 | 128.293429 | 125.44058  | 0.132895382 | 6.91274592 | 0.123193281 | ATM1      |
| YPR051W   | 9.00933521 | 9.49696855 | 9.44201244 | 12.9491726 | 10.0341229 | 7.61811036 | 0.132859128 | 3.30742577 | 0.511904128 | MAK3      |
| YMR015C   | 315.458255 | 256.533266 | 309.89169  | 329.878694 | 314.706582 | 322.155684 | 0.132742004 | 8.26777565 | 0.183701197 | ERG5      |
| YJL074C   | 76.4807069 | 72.8676496 | 69.4835275 | 87.0964897 | 78.1228141 | 74.5670971 | 0.132727609 | 6.25854184 | 0.140888075 | SMC3      |
| YER017C   | 196.298289 | 177.909877 | 187.085003 | 207.600662 | 207.393592 | 200.265918 | 0.132647528 | 7.61621706 | 0.132470163 | AFG3      |
| YOL001W   | 29.6584685 | 22.2171507 | 27.3576258 | 27.5539472 | 28.9947058 | 30.2142004 | 0.132362357 | 4.79515277 | 0.292822318 | PHO80     |
| YOR005C   | 32.6835007 | 28.3182335 | 29.1733974 | 30.3329934 | 33.2298876 | 35.2499005 | 0.132340802 | 4.98186158 | 0.230590251 | DNL4      |
| YDL151C   | 6.37887237 | 9.61208332 | 8.59465235 | 9.81535457 | 6.84144744 | 10.3296412 | 0.132304655 | 3.12786484 | 0.537381929 | BDU30     |
| YJL092W   | 145.727641 | 118.107754 | 145.322256 | 149.477207 | 146.276662 | 152.555888 | 0.13223812  | 7.16003625 | 0.170786775 | SR52      |
| YDL153C   | 93.8417616 | 96.235948  | 93.0280329 | 119.144214 | 96.9530837 | 94.0642948 | 0.132184205 | 6.62959878 | 0.180929314 | SAS10     |
| YPR125W   | 78.3877925 | 91.5162424 | 88.2465009 | 99.3952472 | 94.0210348 | 89.5450768 | 0.132014507 | 6.49701874 | 0.141162647 | YHL47     |
| YGR031W   | 40.0487967 | 39.7145957 | 40.7943358 | 41.5674353 | 42.612444  | 47.9682711 | 0.131967105 | 5.40025806 | 0.173936312 | IMO32     |
| YDR449C   | 62.0789229 | 63.0253367 | 65.1256756 | 65.0415062 | 70.8904268 | 72.5657292 | 0.131667643 | 6.05677164 | 0.125375017 | UTP6      |
| YDR205W   | 78.8481235 | 64.6369435 | 77.1097683 | 78.1089361 | 80.2729833 | 83.1536114 | 0.131432135 | 6.26911785 | 0.162626677 | MSC2      |
| YHR071C-A | 6.18158766 | 6.61909929 | 5.87099492 | 5.97199284 | 6.51566423 | 8.0054719  | 0.131400406 | 2.73219732 | 0.48084968  | YHR071C-A |
| YGL008C   | 11419.2337 | 8822.45355 | 10877.3194 | 12071.5853 | 11358.562  | 10654.2501 | 0.131321982 | 13.407711  | 0.240024721 | PMA1      |
| YLR324W   | 77.0725611 | 63.5433532 | 77.4123969 | 81.2427541 | 81.3154895 | 76.1165433 | 0.131314756 | 6.25221374 | 0.169219173 | PEX30     |
| YNL059C   | 126.459501 | 129.389002 | 124.864562 | 153.084054 | 137.545672 | 126.279863 | 0.131300502 | 7.05603641 | 0.149291784 | ARP5      |
| YMR220W   | 130.273672 | 143.145217 | 126.377705 | 160.475134 | 142.302107 | 135.060058 | 0.131219543 | 7.12663253 | 0.162245819 | ERG8      |
| YPR024W   | 243.449335 | 217.682031 | 239.379226 | 257.268721 | 260.822039 | 248.686111 | 0.130553259 | 7.93463053 | 0.147166893 | YME1      |
| YPL039W   | 22.4904572 | 28.3182335 | 24.0287112 | 23.7697141 | 28.0825128 | 30.2142004 | 0.13049566  | 4.71549056 | 0.315602915 | YPL039W   |
| YPL234C   | 141.716185 | 116.496148 | 131.038186 | 137.355835 | 147.058542 | 141.580644 | 0.130494883 | 7.08719211 | 0.157968811 | VMA11     |
| YJL155C   | 25.3182048 | 27.6851023 | 22.8787225 | 32.2251099 | 26.3232835 | 24.4683375 | 0.130494287 | 4.73462122 | 0.323466594 | FBP26     |
| YGR174C   | 15.1909229 | 15.8282809 | 15.4945845 | 19.15768   | 15.9633774 | 15.7527028 | 0.130414594 | 4.03255671 | 0.344172742 | CBP4      |
| YDL150W   | 68.194749  | 55.0248602 | 62.4020181 | 70.3039554 | 66.655245  | 66.0451432 | 0.130382975 | 6.01968969 | 0.176516815 | RPC53     |
| YIL131C   | 67.1425639 | 70.5653542 | 67.7888073 | 81.7749119 | 75.581705  | 67.5300291 | 0.130369785 | 6.16718481 | 0.155493196 | FKH1      |
| YKL094W   | 73.5214362 | 82.5372903 | 77.2913455 | 90.9398514 | 85.1597314 | 79.3445562 | 0.130362351 | 6.35051957 | 0.141516563 | YJU3      |
| YMR292W   | 64.1175316 | 55.4853193 | 57.438909  | 59.0695134 | 63.0064731 | 71.6618856 | 0.130244648 | 5.95177907 | 0.189707671 | GOT1      |
| YHR137W   | 254.365756 | 208.357734 | 266.010543 | 271.518724 | 256.261074 | 269.668195 | 0.130197272 | 7.9913673  | 0.210269688 | ARO9      |
| YDR386W   | 16.6376774 | 18.6485928 | 17.8550876 | 21.7002116 | 17.85292   | 18.5933541 | 0.130187073 | 4.22388335 | 0.329717494 | MUS81     |
| YNL125C   | 114.556656 | 87.5447828 | 116.148858 | 112.167034 | 118.389619 | 117.628789 | 0.130110059 | 6.79662859 | 0.221172238 | ESBP6     |
| YKL059C   | 41.7585975 | 35.5129066 | 35.2259695 | 42.2178504 | 43.3291671 | 37.4449492 | 0.129986146 | 5.2985832  | 0.229665839 | MPE1      |
| YOL110W   | 34.1960169 | 23.4834131 | 29.476026  | 36.3049862 | 30.9494051 | 27.9545914 | 0.129962629 | 4.93093457 | 0.372926649 | SHR5      |
| YNL223W   | 21.5040337 | 21.7566916 | 23.4839797 | 26.430503  | 22.7396681 | 23.8227349 | 0.12986161  | 4.54966208 | 0.273571609 | ATG4      |
| YDR388W   | 325.388253 | 303.557649 | 319.575806 | 364.173306 | 345.98177  | 327.578745 | 0.129818625 | 8.37139597 | 0.151337669 | RVS167    |
| YNL221C   | 120.409436 | 125.417542 | 126.922437 | 123.164961 | 133.766587 | 151.006442 | 0.129725761 | 7.02488582 | 0.159812745 | POP1      |
| YLR173W   | 42.2846901 | 35.7431362 | 41.6416959 | 43.4004232 | 41.700251  | 45.7086621 | 0.129404695 | 5.38735554 | 0.204218916 | YLR173W   |
| YKL017C   | 31.4997924 | 34.073972  | 33.3496722 | 35.5954425 | 37.0741294 | 35.5727018 | 0.12895922  | 5.11484531 | 0.183165654 | HCS1      |

|           |            |            |            |             |            |            |             |            |             |           |
|-----------|------------|------------|------------|-------------|------------|------------|-------------|------------|-------------|-----------|
| YPL176C   | 111.005532 | 97.73244   | 105.435806 | 114.473051  | 116.04398  | 112.91589  | 0.128910535 | 6.77756147 | 0.126307365 | TRE1      |
| YDR441C   | 23.6084039 | 18.4183632 | 23.9076597 | 24.1836146  | 23.5867045 | 24.2100965 | 0.12823714  | 4.52944202 | 0.323374442 | APT2      |
| YLR086W   | 109.164208 | 98.8835877 | 100.291119 | 121.92326   | 113.307401 | 101.617845 | 0.128236736 | 6.75023126 | 0.16434983  | SMC4      |
| YBL075C   | 61.6185919 | 55.9457784 | 61.7967609 | 63.267647   | 66.1991485 | 66.497065  | 0.127981498 | 5.96956673 | 0.139729506 | SSA3      |
| YPR007C   | 1.31523142 | 1.20870509 | 1.4526173  | 1.24170148  | 1.95469927 | 1.16208463 | 0.127888487 | 0.59299629 | 0.728809859 | REC8      |
| YHR193C-A | 0.26304628 | 0.28778693 | 0.42368005 | 0.23651457  | 0.26062657 | 0.58104232 | 0.127858958 | -1.1055954 | 1           | YHR193C-A |
| YNR039C   | 86.3449425 | 72.925207  | 85.5833692 | 83.3713852  | 90.9586726 | 93.1604512 | 0.127824128 | 6.417708   | 0.170439015 | ZRG17     |
| YLR236C   | 2.76198598 | 2.30229541 | 2.48155455 | 2.89730346  | 2.86689226 | 2.45328978 | 0.127543528 | 1.45821971 | 0.594564238 | YLR236C   |
| YMR031C   | 174.399686 | 155.117153 | 162.027355 | 196.543606  | 180.092959 | 160.173998 | 0.127500361 | 7.42217825 | 0.195835857 | EIS1      |
| YDL239C   | 32.6835007 | 32.0019061 | 33.4101979 | 39.6161901  | 34.1420805 | 33.3130927 | 0.127453194 | 5.10117706 | 0.23293443  | ADY3      |
| YDR496C   | 158.025055 | 175.665139 | 180.911379 | 188.442982  | 187.390503 | 186.385463 | 0.127450058 | 7.48863908 | 0.154532266 | PUF6      |
| YLL026W   | 532.602962 | 496.950463 | 487.232052 | 657.096599  | 534.21931  | 465.092093 | 0.127160067 | 9.04712677 | 0.285348021 | HSP104    |
| YPL100W   | 23.4111192 | 29.0089221 | 25.7234313 | 26.9626608  | 29.1901757 | 29.3103568 | 0.126978591 | 4.77591216 | 0.27469677  | ATG21     |
| YFR027W   | 5.26092567 | 6.33131237 | 5.38678915 | 6.56327926  | 5.53831459 | 6.45602573 | 0.126856349 | 2.59803603 | 0.504091088 | ECO1      |
| YLR443W   | 60.1718373 | 54.391729  | 60.707298  | 65.573664   | 63.4625696 | 62.236088  | 0.126792565 | 5.93562248 | 0.147272483 | ECM7      |
| YIL146C   | 36.629195  | 34.3617589 | 36.194381  | 35.5954425  | 40.7880581 | 40.6729621 | 0.12665323  | 5.22806459 | 0.20787343  | ATG32     |
| YDR334W   | 140.598239 | 134.569166 | 133.94342  | 149.950236  | 154.812182 | 141.838885 | 0.126640555 | 7.15719169 | 0.129333421 | SWR1      |
| YJR072C   | 100.023349 | 90.4802094 | 97.8700905 | 114.295665  | 102.882338 | 97.4859885 | 0.126593315 | 6.65289955 | 0.160121787 | NPA3      |
| YGL169W   | 74.5736214 | 57.6149425 | 68.1519616 | 74.4429603  | 70.4994869 | 73.5986933 | 0.126581723 | 6.12758351 | 0.208592663 | SUA5      |
| YIL020C-A | 6.70768023 | 8.97895208 | 8.23149803 | 9.34232544  | 9.51286977 | 7.29530907 | 0.126408927 | 3.08449004 | 0.49089259  | YIL020C-A |
| YDR436W   | 63.591439  | 60.6079266 | 64.8835727 | 70.2448267  | 69.4569807 | 66.6261855 | 0.126304367 | 6.04484942 | 0.132761096 | PPZ2      |
| YHR164C   | 70.1675961 | 62.7951072 | 64.6414698 | 74.5612176  | 68.3493177 | 72.6302894 | 0.126257242 | 6.10796363 | 0.150472926 | DNA2      |
| YKL188C   | 14.2044993 | 13.007969  | 13.7393386 | 14.0134882  | 16.1588473 | 14.5260579 | 0.126227196 | 3.84659959 | 0.36633207  | PXA2      |
| YKL136W   | 5.39244881 | 8.63360777 | 7.62624082 | 8.51452445  | 7.5581705  | 7.61811036 | 0.126150268 | 2.94528886 | 0.530753838 | YKL136W   |
| YBR016W   | 22.1616494 | 27.2822006 | 20.820848  | 15.8464761  | 25.7368737 | 35.1853402 | 0.12605823  | 4.62077663 | 0.563012096 | YBR016W   |
| YMR201C   | 16.0458233 | 15.3678218 | 14.2235444 | 17.2655635  | 16.2240039 | 16.2691848 | 0.125894928 | 4.00182076 | 0.340023538 | RAD14     |
| YLR072W   | 67.6028949 | 56.8666965 | 61.8572867 | 62.2033314  | 68.6751009 | 72.3720484 | 0.125744138 | 6.0229799  | 0.194420901 | YLR072W   |
| YOL087C   | 138.033537 | 137.331921 | 138.724952 | 153.497955  | 155.463748 | 142.807289 | 0.125699486 | 7.17423562 | 0.128858123 | DUF1      |
| YBR108W   | 70.4306424 | 64.8671731 | 69.1203731 | 70.9543704  | 78.318284  | 73.6632535 | 0.125172967 | 6.15652061 | 0.143617236 | AIM3      |
| YPR028W   | 373.459961 | 316.335389 | 360.551719 | 378.718952  | 379.146501 | 387.555224 | 0.125137367 | 8.51596466 | 0.184672979 | YOD1      |
| YKL141W   | 143.294463 | 106.135818 | 130.372403 | 136.941935  | 142.82336  | 134.285335 | 0.125080279 | 7.04881165 | 0.235786258 | SDH3      |
| YHR150W   | 31.8943619 | 33.6135129 | 32.9259921 | 36.009343   | 38.1819724 | 33.1839722 | 0.124966938 | 5.10538993 | 0.220668828 | PEX28     |
| YLL058W   | 49.0581319 | 45.6430064 | 47.8153194 | 53.8661929  | 50.626711  | 50.8089225 | 0.124828002 | 5.63679141 | 0.161790733 | YLL058W   |
| YIR038C   | 62.8023002 | 57.7876147 | 60.1020407 | 70.1856981  | 64.3747626 | 62.3006483 | 0.12463272  | 5.97835117 | 0.160523628 | GTT1      |
| YLR431C   | 19.2023787 | 17.6125599 | 19.9734879 | 18.6846509  | 19.2863661 | 23.9518554 | 0.124519752 | 4.31427465 | 0.365687122 | ATG23     |
| YDR534C   | 17.4925779 | 12.7777395 | 16.3419446 | 14.7821605  | 18.9605829 | 17.0439079 | 0.124493871 | 4.02914507 | 0.442692593 | FIT1      |
| YER002W   | 27.1595288 | 30.9083158 | 28.3260373 | 35.7136998  | 29.8417422 | 28.600194  | 0.124442627 | 4.91808497 | 0.292502978 | NOP16     |
| YJR040W   | 146.648303 | 131.058166 | 145.564359 | 156.75003   | 153.183266 | 151.264683 | 0.124136283 | 7.20481842 | 0.145917437 | GEF1      |
| YNL008C   | 88.9096438 | 77.5873552 | 81.5886716 | 90.8215941  | 89.4600698 | 89.9324384 | 0.123950396 | 6.43451719 | 0.145468384 | ASI3      |
| YDR187C   | 59.7115063 | 53.2981386 | 56.7126004 | 58.0051978  | 59.6183277 | 67.2717881 | 0.123761074 | 5.88773796 | 0.187330416 | YDR187C   |
| YLR299W   | 60.2375989 | 57.2120408 | 61.0704523 | 65.9875645  | 61.7684969 | 66.6907458 | 0.123735045 | 5.96070304 | 0.146632429 | ECM38     |
| YOL144W   | 38.470519  | 40.1750548 | 41.8837988 | 46.5933699  | 42.9382273 | 41.7704864 | 0.123700203 | 5.39583183 | 0.197028749 | NOP8      |
| YJL174W   | 211.686497 | 187.98242  | 225.821464 | 192.581987  | 236.388298 | 252.559726 | 0.123682206 | 7.76772652 | 0.274358533 | KRE9      |
| YEL016C   | 55.7000505 | 55.5428767 | 57.2573319 | 58.7147415  | 62.3549066 | 65.5588893 | 0.123646226 | 5.87783435 | 0.143534856 | NPP2      |
| YGL081W   | 4.01145582 | 4.77726297 | 5.44731487 | 5.97199284  | 5.47315795 | 4.06729621 | 0.123555852 | 2.34861436 | 0.591890452 | YGL081W   |
| YOR309C   | 53.7272034 | 58.2480738 | 48.5416281 | 81.1836255  | 54.7315795 | 38.8652749 | 0.123418749 | 5.80861768 | 0.515823343 | YOR309C   |
| YKR024C   | 96.4722245 | 96.1208332 | 102.288468 | 100.459563  | 103.142965 | 117.628789 | 0.123191141 | 6.68368667 | 0.165350206 | DBP7      |
| YOL137W   | 61.9473998 | 52.7801222 | 59.9204636 | 61.9668168  | 62.2245934 | 65.9160227 | 0.123047257 | 5.92835508 | 0.181198523 | BSC6      |
| YPL138C   | 19.2023787 | 22.6200524 | 21.4866309 | 25.1296729  | 20.7198122 | 23.1125721 | 0.123044188 | 4.47151522 | 0.33056033  | SPC1      |
| YHR140W   | 9.9299972  | 12.7777395 | 11.3183098 | 11.32982138 | 12.3146054 | 13.2348527 | 0.122949616 | 3.58373725 | 0.436766673 | YHR140W   |
| YDR150W   | 224.115434 | 209.739111 | 224.792527 | 230.187803  | 250.13635  | 236.871584 | 0.122868784 | 7.84182864 | 0.167168888 | NUM1      |
| YKL171W   | 59.3826985 | 56.2911227 | 52.4757999 | 63.7406761  | 56.9469053 | 62.3006483 | 0.122792405 | 5.87389005 | 0.179674579 | NNK1      |
| YKL219W   | 61.4213072 | 51.6289745 | 62.0388638 | 63.8589334  | 64.6353891 | 62.0424072 | 0.122781031 | 5.93184514 | 0.195667885 | COS9      |
| YDR393W   | 19.2681403 | 22.1595933 | 18.3392934 | 22.2323694  | 23.0002947 | 19.8845592 | 0.122776704 | 4.38844244 | 0.335485117 | SHE9      |
| YLL060C   | 8.08867322 | 10.4754441 | 8.29202375 | 10.5840269  | 10.4250628 | 8.26371293 | 0.122762131 | 3.24677478 | 0.493980829 | GTT2      |
| YMR124W   | 58.5935596 | 62.2770907 | 64.8835727 | 64.9823776  | 68.0886912 | 69.273156  | 0.122694231 | 6.018017   | 0.1530235   | EPO1      |
| YML042W   | 14.4675456 | 13.9864446 | 15.5551102 | 16.1421193  | 13.8132082 | 17.9477515 | 0.122685068 | 3.94866176 | 0.403765886 | CAT2      |
| YIR004W   | 50.1760786 | 52.9527943 | 53.2626343 | 62.8537465  | 57.6636284 | 49.7113981 | 0.122666695 | 5.77008949 | 0.224896525 | DJP1      |
| YCR073W-A | 84.1748107 | 78.9111175 | 82.4965574 | 97.5622593  | 85.0945748 | 84.573937  | 0.122664298 | 6.41945301 | 0.165960223 | SOL2      |
| YER093C   | 64.512101  | 66.4787798 | 67.3046015 | 65.5145353  | 77.5364043 | 72.9530907 | 0.122597573 | 6.11190258 | 0.127984455 | TSC11     |
| YBL064C   | 50.8336943 | 66.0183208 | 49.6916168 | 68.4709674  | 58.2500382 | 54.6179776 | 0.122515731 | 5.86127655 | 0.314435305 | PRX1      |
| YMR214W   | 112.386525 | 99.6893911 | 112.698892 | 126.239651  | 116.109137 | 111.043642 | 0.122440296 | 6.82206118 | 0.173263447 | SCJ1      |
| YGR080W   | 64.05177   | 72.2920757 | 66.9414472 | 74.9751181  | 73.5618491 | 72.8239702 | 0.122337348 | 6.14781137 | 0.150496994 | TWF1      |
| YLR129W   | 216.552853 | 216.012866 | 222.129395 | 238.051913  | 231.957646 | 242.617447 | 0.122325483 | 7.83293605 | 0.15506074  | DIP2      |
| YNL308C   | 123.171422 | 126.396018 | 119.840927 | 156.040486  | 128.619212 | 117.305987 | 0.122326914 | 7.00789634 | 0.23965915  | KR11      |
| YLO027C   | 176.767102 | 159.951973 | 168.019401 | 200.564354  | 181.852189 | 166.759145 | 0.122115644 | 7.45758613 | 0.201941152 | MDM38     |
| YDL097C   | 175.517633 | 182.572026 | 187.145529 | 207.127633  | 196.251806 | 189.936277 | 0.121939755 | 7.56899974 | 0.165831498 | RPN6      |
| YEL049W   | 1.64403927 | 1.78427894 | 1.99734879 | 1.71473062  | 1.88954263 | 1.62416926 | 0.121848936 | 1.01006508 | 0.723926371 | PAU2      |
| YDL098C   | 7.10224965 | 7.65513222 | 6.59730357 | 5.85373556  | 8.60067678 | 8.84475525 | 0.121765259 | 2.91674643 | 0.536362835 | SNU23     |
| YNL107W   | 13.5468836 | 12.259723  | 14.0419672 | 15.6690901  | 13.8132082 | 13.8158951 | 0.121745853 | 3.80543349 | 0.397114912 | YAF9      |
| YDR309C   | 184.395445 | 179.694156 | 178.066671 | 179.8102    | 205.569206 | 204.526895 | 0.121624979 | 7.56059182 | 0.182373742 | GIC2      |
| YGR237C   | 53.1353493 | 46.6790393 | 49.3889882 | 57.3547828  | 55.2528326 | 49.5822776 | 0.1215973   | 5.7008697  | 0.20968866  | YGR237C   |
| YLR148W   | 43.4683983 | 48.117974  | 43.3364161 | 50.3184744  | 45.0232398 | 51.454525  | 0.121347789 | 5.5571549  | 0.208070293 | PEP3      |

|           |            |            |            |            |            |             |             |            |             |           |
|-----------|------------|------------|------------|------------|------------|-------------|-------------|------------|-------------|-----------|
| YNL242W   | 70.1675961 | 68.6659605 | 73.2361222 | 73.6742879 | 78.7092239 | 78.3115921  | 0.12119202  | 6.20766493 | 0.143738323 | ATG2      |
| YNL324W   | 1.97284713 | 1.20870509 | 1.87629734 | 1.71473062 | 1.95469927 | 1.8076872   | 0.12114034  | 0.90379257 | 0.716611267 | YNL324W   |
| YGL013C   | 88.3177897 | 97.6173252 | 89.3964896 | 97.444002  | 103.664218 | 98.4543923  | 0.121132735 | 6.58405397 | 0.148876842 | PDR1      |
| YDR217C   | 71.8116354 | 68.2055014 | 70.2098361 | 74.2064457 | 76.4287414 | 77.9887908  | 0.121121429 | 6.19485564 | 0.138305906 | RAD9      |
| YBL089W   | 52.6750183 | 45.5278916 | 50.9626569 | 49.3724161 | 54.6012662 | 58.2333521  | 0.121061235 | 5.70034164 | 0.223633813 | AVT5      |
| YIL091C   | 72.7322974 | 73.6158956 | 77.1097683 | 78.3454507 | 81.8367427 | 82.8953703  | 0.121050818 | 6.28306363 | 0.137470736 | UTP25     |
| YGR284C   | 215.17186  | 174.226205 | 216.016298 | 184.303977 | 219.317258 | 254.754775  | 0.120973809 | 7.71917088 | 0.328437238 | ERV29     |
| YGL131C   | 69.115411  | 62.6799924 | 66.5177672 | 69.9491835 | 74.7998253 | 70.8226022  | 0.1206969   | 6.1104105  | 0.159334525 | SN2       |
| YLR164W   | 9.07509678 | 5.46795159 | 7.2630865  | 7.7458521  | 7.62332714 | 8.26371293  | 0.120501102 | 2.93996158 | 0.56424293  | SHH4      |
| YDR062W   | 408.773925 | 357.949378 | 395.111905 | 454.167099 | 405.469785 | 403.243367  | 0.120483778 | 8.65906188 | 0.210468619 | LCB2      |
| YCR051W   | 84.3063339 | 73.3856661 | 82.1939288 | 93.4232544 | 86.1370811 | 81.0231229  | 0.120302102 | 6.38422245 | 0.189960814 | YCR051W   |
| YNL128W   | 5.26092567 | 4.20168912 | 4.53942906 | 6.3267647  | 5.14737474 | 3.67993466  | 0.120174524 | 2.31775852 | 0.60404298  | TEP1      |
| YLR422W   | 133.035658 | 129.676789 | 128.314528 | 134.10376  | 150.120904 | 140.805921  | 0.120162051 | 7.08873701 | 0.15330786  | YLR422W   |
| YML098W   | 14.0072146 | 14.5620184 | 12.5288242 | 16.674277  | 13.9435214 | 14.0095758  | 0.120138488 | 3.84994321 | 0.417629567 | TAF13     |
| YBR123C   | 55.3054811 | 51.2836302 | 53.7468401 | 61.2572731 | 56.1650256 | 56.6839059  | 0.11982412  | 5.80377539 | 0.175765425 | TFC1      |
| YHR146W   | 173.74207  | 175.550025 | 174.071973 | 210.557094 | 188.628479 | 169.406115  | 0.119785402 | 7.50879167 | 0.216478773 | CRP1      |
| YDR229W   | 38.8650884 | 40.4052844 | 42.2469531 | 45.7655689 | 43.720107  | 42.5452095  | 0.119703025 | 5.40550801 | 0.195646372 | IVY1      |
| YFL002C   | 86.8052735 | 86.2785203 | 93.20961   | 98.9222181 | 96.6273005 | 93.7414935  | 0.119604534 | 6.53481877 | 0.147115722 | SPB4      |
| YNR015W   | 75.5600449 | 80.1774375 | 81.1649916 | 85.3226304 | 81.6412728 | 90.4489204  | 0.119454387 | 6.3665097  | 0.154957536 | SMM1      |
| YML061W   | 238.582979 | 198.400307 | 223.460961 | 255.021833 | 230.980297 | 231.190281  | 0.119263317 | 7.84372983 | 0.223764489 | NOP2      |
| YHR072W   | 207.017425 | 193.220142 | 224.18727  | 213.040497 | 231.631863 | 233.579011  | 0.119244881 | 7.76302479 | 0.203643536 | ERG7      |
| YFR004W   | 112.715332 | 111.200868 | 122.20143  | 129.964755 | 123.471837 | 122.406248  | 0.119012057 | 6.91230411 | 0.155745675 | RPN11     |
| YER023C-A | 7.10224965 | 6.56154191 | 5.50784059 | 8.63278173 | 7.49301386 | 6.484833852 | 0.119006463 | 2.76299078 | 0.627494885 | YER023C-A |
| YPR165W   | 275.014889 | 305.226813 | 273.757835 | 349.864175 | 307.474195 | 270.055556  | 0.11899976  | 8.21452132 | 0.265274863 | RHO1      |
| YBR113W   | 17.7556241 | 17.5550025 | 18.7629734 | 16.3195052 | 18.2438598 | 24.2100965  | 0.118945265 | 4.24147054 | 0.44820786  | YBR113W   |
| YJL095W   | 98.3135484 | 108.322999 | 103.25688  | 107.614128 | 120.800415 | 108.202991  | 0.118776618 | 6.75319848 | 0.170644543 | BCK1      |
| YPL151C   | 37.6813801 | 36.2611526 | 35.2259695 | 42.8682655 | 38.7030455 | 36.8639069  | 0.118691106 | 5.25019177 | 0.24025787  | PRP46     |
| YLR081W   | 6.83920337 | 8.40337823 | 7.44466366 | 8.45539581 | 7.29754393 | 8.9093155   | 0.118427793 | 3.00433678 | 0.489221738 | GAL2      |
| YLR188W   | 106.073414 | 103.545736 | 111.791006 | 114.827823 | 111.287545 | 122.729049  | 0.118168101 | 6.80512654 | 0.159138148 | MDL1      |
| YNL112W   | 439.484578 | 451.01967  | 473.855868 | 409.111074 | 502.813808 | 568.904987  | 0.118067008 | 8.88965767 | 0.306110911 | DBP2      |
| YIL147C   | 171.966508 | 140.555135 | 166.808887 | 162.781151 | 178.268573 | 179.025593  | 0.117883037 | 7.38081107 | 0.230095361 | SLN1      |
| YKL098W   | 41.1667434 | 42.1895633 | 38.0101527 | 43.0456514 | 46.4566859 | 42.224083   | 0.117829225 | 5.40259039 | 0.220347944 | MTC2      |
| YKL143W   | 48.729324  | 51.3987449 | 48.4205766 | 57.1773968 | 51.6040607 | 52.3583686  | 0.117614386 | 5.69336063 | 0.193610685 | LTV1      |
| YBL038W   | 21.9643647 | 25.7857085 | 23.1813511 | 27.908719  | 27.496103  | 21.5631259  | 0.117413511 | 4.63154621 | 0.371757806 | MRPL16    |
| YLR205C   | 6.3131108  | 7.94291915 | 5.99204636 | 7.09543704 | 7.68848379 | 7.23074881  | 0.117219445 | 2.84234127 | 0.518167779 | HMX1      |
| YBR081C   | 111.137055 | 101.934129 | 102.227942 | 117.784255 | 118.976029 | 105.104099  | 0.117140247 | 6.77666952 | 0.180917329 | SPT7      |
| YNL286W   | 13.481122  | 16.3462974 | 13.8603901 | 18.3890077 | 13.6828949 | 15.300781   | 0.117067619 | 3.93752228 | 0.464219222 | CUS2      |
| YOR299W   | 85.2927574 | 87.429668  | 84.554432  | 88.9886062 | 94.4771313 | 95.613741   | 0.11697244  | 6.48396589 | 0.149746941 | BUD7      |
| Q0060     | 0.32880785 | 0.23022954 | 0.54473149 | 0.29564321 | 0.39093985 | 0.51648206  | 0.116968439 | -0.9825478 | 1           | Ai3       |
| YPL113C   | 18.6762861 | 19.281724  | 23.5445054 | 21.2863111 | 21.0455955 | 24.4037772  | 0.116891197 | 4.42590523 | 0.378002172 | YPL113C   |
| YLL043W   | 224.181195 | 189.478912 | 214.261052 | 226.167056 | 216.515522 | 238.033669  | 0.116697806 | 7.76959577 | 0.222249877 | FPS1      |
| YNL313C   | 162.957173 | 164.959466 | 175.887745 | 172.892149 | 183.415948 | 190.000837  | 0.116663013 | 7.45232166 | 0.184748851 | EMW1      |
| YNR069C   | 12.2974138 | 11.5690344 | 9.74464105 | 12.5944007 | 12.7707019 | 11.039804   | 0.116499093 | 3.5592626  | 0.470947485 | BSC5      |
| YHR197W   | 142.834132 | 136.871462 | 153.735331 | 146.047746 | 151.74982  | 172.117646  | 0.116437854 | 7.23524842 | 0.209706961 | RIX1      |
| YDR463W   | 91.0140141 | 89.7895208 | 94.299073  | 100.341305 | 102.165615 | 95.6783013  | 0.11629186  | 6.57996743 | 0.152901095 | STP1      |
| YLR440C   | 51.951641  | 53.4708108 | 55.0784059 | 64.745863  | 53.9496998 | 55.19902    | 0.116271684 | 5.80396039 | 0.228101285 | SEC39     |
| YJL048C   | 33.0780701 | 34.1890868 | 31.654952  | 33.2894255 | 37.2044427 | 36.7993466  | 0.116238707 | 5.10785666 | 0.251537608 | UBX6      |
| YOL145C   | 203.926631 | 207.667046 | 194.469141 | 230.306061 | 214.43051  | 212.080445  | 0.116120716 | 7.71840696 | 0.189618504 | CTR9      |
| YGR147C   | 52.872303  | 55.0248602 | 60.2836179 | 61.6711736 | 60.2047375 | 60.2484008  | 0.116078912 | 5.87135757 | 0.188281133 | NAR1      |
| YIL040W   | 33.867209  | 29.9873977 | 36.5575354 | 33.6441973 | 69.9179766 | 35.7663825  | 0.11605171  | 5.12845764 | 0.297930037 | APQ12     |
| YGR097W   | 97.918979  | 94.3941116 | 100.714799 | 94.7832131 | 113.698341 | 109.171395  | 0.116022104 | 6.67080381 | 0.199234144 | ASK10     |
| YOR288C   | 36.8922413 | 46.1034655 | 39.6443471 | 44.9377679 | 45.2187097 | 42.8680108  | 0.115973487 | 5.41776437 | 0.26117296  | MPD1      |
| YLR199C   | 36.8922413 | 46.9668263 | 42.3680046 | 44.7012534 | 45.9354328 | 46.2897045  | 0.115751501 | 5.45923458 | 0.263563976 | PBA1      |
| YGL185C   | 14.4675456 | 16.6916417 | 15.9182646 | 16.3786338 | 17.7877633 | 16.9147874  | 0.115683513 | 4.04312143 | 0.378199446 | YGL185C   |
| YNL240C   | 69.9045498 | 56.5213522 | 67.0624986 | 68.1161956 | 66.7855583 | 74.6316574  | 0.11566874  | 6.07196908 | 0.244003676 | NAR1      |
| YPR176C   | 74.7051445 | 56.0608931 | 68.3335388 | 70.0674408 | 69.9130771 | 75.6000613  | 0.115630792 | 6.11292358 | 0.277234824 | BET2      |
| YNL045W   | 210.502788 | 171.866352 | 204.758513 | 208.54672  | 212.801594 | 214.662855  | 0.115615426 | 7.67213915 | 0.236362056 | LAP2      |
| YLR146C   | 48.9923703 | 51.7440892 | 52.3547485 | 60.6068581 | 52.3207837 | 52.8748507  | 0.115463126 | 5.73563584 | 0.219889585 | SPE4      |
| YPR178W   | 20.9779411 | 22.562495  | 21.668208  | 26.3713743 | 21.1759087 | 23.0480118  | 0.115239534 | 4.50911351 | 0.353468234 | PRP4      |
| YDL065C   | 31.6313156 | 32.0019061 | 34.3786094 | 37.1327872 | 32.969261  | 36.0246236  | 0.115102899 | 5.09384609 | 0.263536347 | PBX19     |
| YLR377C   | 11.9028443 | 8.34582085 | 11.9840927 | 10.0518691 | 11.663039  | 13.1702925  | 0.114987978 | 3.49613961 | 0.542008366 | FEP1      |
| YCR025C   | 1.77556241 | 1.95695109 | 1.69472018 | 2.48340296 | 1.82438598 | 1.54944617  | 0.114909766 | 1.00833663 | 0.730700738 | YCR025C   |
| YLR117C   | 46.7564769 | 45.5278916 | 48.5416281 | 54.3983506 | 49.1932649 | 48.8075545  | 0.114690133 | 5.61463758 | 0.211695489 | CLF1      |
| YOR384W   | 72.7322974 | 61.6439595 | 74.0834823 | 72.3143292 | 76.7545246 | 76.5684651  | 0.1146423   | 6.17900531 | 0.218354956 | FRE5      |
| YLR107W   | 35.4454867 | 47.6575149 | 39.0390899 | 45.8838262 | 45.2838664 | 41.1894441  | 0.114628628 | 5.41145446 | 0.319043552 | REX3      |
| YDR153C   | 53.0695877 | 49.2115643 | 46.181125  | 58.2417124 | 51.0176509 | 51.3254045  | 0.114459672 | 5.69016071 | 0.242475856 | ENT5      |
| YGR152C   | 35.0509173 | 38.2181037 | 42.1864274 | 42.8682655 | 39.2894553 | 42.8680108  | 0.11443625  | 5.32953728 | 0.266589775 | RSR1      |
| YLR424W   | 20.1888023 | 21.7566916 | 21.7287338 | 24.1836146 | 22.4790416 | 22.2732888  | 0.114399975 | 4.47457864 | 0.323254855 | SPP382    |
| YBL017C   | 512.216875 | 403.822614 | 485.961012 | 497.271879 | 512.456991 | 507.830984  | 0.114374851 | 8.92686763 | 0.266151048 | PEP1      |
| YOR227W   | 206.425571 | 178.08255  | 201.55065  | 209.84755  | 211.237834 | 213.177969  | 0.114245289 | 7.6688501  | 0.212800998 | HER1      |
| YNL024C-A | 5.52397195 | 4.2592465  | 5.62889203 | 5.55809235 | 7.03691736 | 4.06729621  | 0.114231003 | 2.44867016 | 0.626380726 | KSH1      |
| YKL211C   | 149.673335 | 138.655741 | 140.722301 | 148.47202  | 154.942495 | 160.948721  | 0.114180761 | 7.21927755 | 0.175859458 | TRP3      |
| YLR429W   | 230.494306 | 223.552884 | 235.445054 | 250.173284 | 244.532878 | 251.526762  | 0.114140441 | 7.90331736 | 0.186708109 | CRN1      |

|         |            |            |            |            |            |            |             |            |             |         |
|---------|------------|------------|------------|------------|------------|------------|-------------|------------|-------------|---------|
| YDR382W | 1106.63571 | 951.596249 | 1006.36116 | 1461.48264 | 1078.79853 | 776.337094 | 0.114068136 | 10.0548489 | 0.501762695 | RPP2B   |
| YDR464W | 131.85195  | 132.497101 | 135.698666 | 146.047746 | 140.673191 | 146.228983 | 0.114048761 | 7.11847681 | 0.158190528 | SPP41   |
| YER005W | 120.606721 | 103.833523 | 119.356721 | 113.053964 | 124.18856  | 134.801817 | 0.113978055 | 6.89973627 | 0.234054856 | YND1    |
| YKL033W | 54.3190575 | 54.4492863 | 56.1678689 | 56.8817536 | 60.5956773 | 61.0740034 | 0.113966817 | 5.84207094 | 0.181417778 | TT11    |
| YKR103W | 35.708533  | 33.3832834 | 40.6732844 | 39.3205469 | 39.8758651 | 39.5754377 | 0.113923719 | 5.25575876 | 0.271712476 | NFT1    |
| YMR296C | 363.529964 | 288.938073 | 361.762233 | 332.716869 | 376.800862 | 387.942586 | 0.113839126 | 8.45959899 | 0.300040341 | LCB1    |
| YDR193W | 7.56258065 | 6.27375498 | 7.08150933 | 6.79979383 | 8.014267   | 7.81179113 | 0.113748288 | 2.88087114 | 0.528707713 | YDR193W |
| YDR124W | 10.5876129 | 9.6696407  | 11.6814641 | 12.5944007 | 10.555376  | 11.3626053 | 0.113746331 | 3.4855353  | 0.477745358 | YDR124W |
| YBR294W | 41.5613128 | 34.4193163 | 41.5811702 | 41.449178  | 42.2215042 | 43.4490531 | 0.113660096 | 5.35356853 | 0.274702225 | SUL1    |
| YDL138W | 48.5978009 | 42.7075798 | 54.0494687 | 48.4263578 | 54.8618928 | 53.9723751 | 0.113508879 | 5.65939078 | 0.28188645  | RGT2    |
| YLR040C | 16.9007237 | 17.3247729 | 18.7024477 | 15.196061  | 19.2212095 | 22.9188913 | 0.113489311 | 4.20816065 | 0.465827683 | AFB1    |
| YDL241W | 2.30165498 | 3.91390219 | 1.99734879 | 3.01556074 | 3.64877197 | 2.259609   | 0.113313675 | 1.58023465 | 0.720540313 | YDL241W |
| YBR223C | 23.9372118 | 22.1020359 | 23.665568  | 21.2863111 | 26.3232835 | 27.8254709 | 0.113035794 | 4.60239777 | 0.375646182 | TDP1    |
| YAL034C | 38.7993268 | 38.3907759 | 39.3417185 | 39.4979329 | 42.9382273 | 43.6427339 | 0.113016965 | 5.34158692 | 0.230471948 | LUN19   |
| YBR208C | 125.801885 | 101.876572 | 116.69359  | 122.691932 | 125.947789 | 123.632893 | 0.112910618 | 6.90139079 | 0.222752332 | DUR1,2  |
| YDR198C | 26.8964825 | 31.1385454 | 27.4786772 | 31.5746948 | 28.7992359 | 32.1510081 | 0.112854173 | 4.89751952 | 0.303685421 | RKM2    |
| YDR398W | 208.924511 | 181.881337 | 224.489898 | 209.01975  | 225.246512 | 230.93204  | 0.112545229 | 7.73822911 | 0.259023069 | UTP5    |
| YHR014W | 4.01145582 | 3.45344311 | 4.11574901 | 4.19813358 | 4.43065167 | 3.87361544 | 0.11251727  | 2.04710466 | 0.603919722 | SPO13   |
| YLR034C | 144.806979 | 123.748378 | 165.840475 | 152.433639 | 153.313579 | 163.789373 | 0.112353647 | 7.236151   | 0.283555659 | SMF3    |
| YLR229C | 183.803591 | 132.439543 | 157.548451 | 200.26871  | 161.002063 | 150.68364  | 0.112330827 | 7.36111462 | 0.384278623 | CDC42   |
| YNR060W | 21.1752258 | 15.7131661 | 19.9129621 | 18.8620368 | 21.6971619 | 20.7884028 | 0.112266816 | 4.30662126 | 0.434242077 | FRE4    |
| YBR176W | 16.4403927 | 18.0730189 | 16.4629961 | 18.8620368 | 18.6999563 | 17.56039   | 0.11217838  | 4.15471706 | 0.372446136 | ECM31   |
| YGL066W | 45.1781992 | 45.7581212 | 43.7600961 | 49.0176442 | 47.0430957 | 49.5177173 | 0.112148935 | 5.54950445 | 0.205150206 | SGF73   |
| YKL114C | 47.8744236 | 51.110958  | 50.3573997 | 56.7043677 | 56.1650256 | 48.5493135 | 0.11212219  | 5.69832668 | 0.238636551 | APN1    |
| YJL084C | 104.166328 | 89.3290617 | 100.959072 | 100.696077 | 106.33564  | 111.108203 | 0.111901912 | 6.67528069 | 0.210541492 | ALY2    |
| YOR322C | 146.319495 | 123.633263 | 149.07485  | 139.543595 | 154.877339 | 158.366311 | 0.111881812 | 7.18390555 | 0.247868907 | LDB19   |
| YBR233W | 33.5384011 | 36.3762674 | 34.0154551 | 35.2997993 | 37.2695994 | 39.8336787 | 0.1118578   | 5.17694839 | 0.260367255 | PBP2    |
| YKL164C | 949.005229 | 853.115563 | 1020.16102 | 841.991862 | 1078.92884 | 1128.31962 | 0.111558451 | 9.93469201 | 0.351451293 | PIR1    |
| YOR119C | 52.411972  | 54.2766142 | 56.8941775 | 62.8537465 | 59.0970745 | 54.7470982 | 0.111478877 | 5.82893827 | 0.219902496 | RIO1    |
| YPL259C | 57.4756129 | 66.8241241 | 61.3125552 | 63.6815474 | 68.3493177 | 68.6275535 | 0.111290416 | 6.01132462 | 0.21591024  | APM1    |
| YGL216W | 75.9546144 | 65.6729764 | 73.7808536 | 72.5508437 | 79.1001637 | 80.9585626 | 0.111072313 | 6.22443545 | 0.220373621 | KIP3    |
| YGR271W | 134.942743 | 142.396971 | 133.338163 | 147.939862 | 158.330641 | 137.319667 | 0.1110673   | 7.15482759 | 0.204602779 | SLH1    |
| YBR059C | 184.592729 | 147.001562 | 173.103561 | 167.6297   | 185.175177 | 192.195886 | 0.111014663 | 7.45156975 | 0.281253319 | AKL1    |
| YKR066C | 247.460791 | 170.945434 | 204.516411 | 234.445066 | 215.929112 | 222.151845 | 0.110933148 | 7.75491301 | 0.355117314 | CCP1    |
| YDR389W | 97.1298402 | 98.8260303 | 104.10424  | 107.495871 | 110.635979 | 105.943382 | 0.110913002 | 6.70243573 | 0.169917355 | SAC7    |
| YLR231C | 132.641088 | 121.446083 | 135.517089 | 142.145255 | 138.197238 | 140.289439 | 0.110820548 | 7.07847409 | 0.188781771 | BNAS    |
| YDR349C | 164.93002  | 127.834952 | 158.093183 | 151.07368  | 159.50346  | 176.184942 | 0.110778445 | 7.28876447 | 0.299654003 | YPS7    |
| YNL101W | 142.044993 | 115.747902 | 131.703968 | 130.20127  | 139.044275 | 151.264683 | 0.110769122 | 7.07785907 | 0.25898078  | AVT4    |
| YKL127W | 228.521459 | 217.394244 | 223.097807 | 243.196105 | 235.932202 | 243.198489 | 0.110719491 | 7.85802686 | 0.20013126  | PGM1    |
| YGL209W | 92.1319608 | 107.63231  | 108.280515 | 94.3693126 | 119.562439 | 118.855434 | 0.110607092 | 6.74039818 | 0.298637337 | MIG2    |
| YDR536W | 8.02291165 | 9.20918162 | 9.50253816 | 10.5840269 | 8.53552014 | 9.74859885 | 0.110584914 | 3.23307768 | 0.503100447 | STL1    |
| YDL077C | 63.2626312 | 64.1764844 | 57.6810119 | 68.1161956 | 65.026329  | 66.6907458 | 0.110524477 | 6.00633487 | 0.199934868 | VAM6    |
| YPL163C | 217.802323 | 206.400783 | 257.597468 | 202.870371 | 252.156206 | 281.09536  | 0.110431565 | 7.88520177 | 0.372519989 | SVS1    |
| YMR196W | 88.8438822 | 77.1844535 | 85.401792  | 93.3049971 | 91.1541425 | 86.833546  | 0.110430617 | 6.44681521 | 0.205226353 | YMR196W |
| YBR065C | 22.9507882 | 22.7351671 | 22.9997739 | 25.7209593 | 25.9323436 | 22.4669695 | 0.11030362  | 4.58041888 | 0.341350713 | ECM2    |
| YDL060W | 143.294463 | 136.641232 | 153.009022 | 142.204384 | 157.157821 | 167.985789 | 0.110131592 | 7.23032304 | 0.231566488 | TSR1    |
| YKL111C | 10.5218513 | 11.1085753 | 8.65517807 | 10.4657696 | 10.3599061 | 11.8790873 | 0.110116168 | 3.40852983 | 0.503706413 | YKL111C |
| YML012W | 213.856628 | 216.358211 | 205.666399 | 257.623493 | 214.104726 | 214.404614 | 0.109942408 | 7.78444688 | 0.263059382 | ERV25   |
| YMR317W | 67.6686564 | 50.6504989 | 67.4861787 | 72.4325865 | 65.4824255 | 62.4297688 | 0.109885191 | 6.01053949 | 0.341712856 | YMR317W |
| YKR023W | 23.2138345 | 27.5124301 | 25.0574684 | 28.3817482 | 27.0400065 | 26.4051452 | 0.109672314 | 4.7226733  | 0.332814691 | YKR023W |
| YEL012W | 7.82562693 | 9.72719809 | 7.98939514 | 9.9927405  | 9.51286977 | 8.07003216 | 0.109304917 | 3.16818038 | 0.527374041 | UBC8    |
| YDL047W | 103.311428 | 101.416113 | 96.4174732 | 119.912886 | 108.811593 | 96.0011026 | 0.109253301 | 6.70655131 | 0.247828008 | SIT4    |
| YLR047C | 60.7636915 | 49.3842365 | 66.0335614 | 59.3651566 | 64.7657024 | 65.8514624 | 0.109104962 | 5.9337841  | 0.316085629 | FRE8    |
| YOR014W | 228.718743 | 208.185062 | 224.550424 | 228.118301 | 241.665986 | 243.585851 | 0.10906142  | 7.84074894 | 0.222468453 | RTS1    |
| YER013W | 78.2562693 | 69.0688622 | 71.2387734 | 81.4792687 | 76.3635847 | 77.7305497 | 0.109034934 | 6.24420662 | 0.208093233 | PRP22   |
| YDR173C | 17.4268163 | 18.5910354 | 16.039316  | 21.5228257 | 18.0483899 | 16.5274259 | 0.108985123 | 4.18290191 | 0.444095584 | ARG82   |
| YNL105W | 2.43317812 | 2.41741018 | 2.66313171 | 2.66078889 | 2.34563912 | 3.09889235 | 0.108813029 | 1.44688215 | 0.6640043   | RRT16   |
| YCL040W | 505.640718 | 399.160466 | 470.648005 | 520.509436 | 484.635105 | 477.810464 | 0.10873209  | 8.89635837 | 0.296084977 | GLK1    |
| YER094C | 104.429375 | 111.085753 | 101.077954 | 130.792556 | 106.987207 | 103.490092 | 0.108644082 | 6.77854171 | 0.277958028 | PUP3    |
| YOR207C | 207.938087 | 217.969818 | 206.513759 | 223.269752 | 226.745115 | 231.900444 | 0.108591555 | 7.77595615 | 0.209307882 | RET1    |
| YDR090C | 44.1917756 | 36.7791691 | 42.1864274 | 46.1794694 | 43.7852636 | 42.6743301 | 0.108513954 | 5.41770675 | 0.283648643 | YDR090C |
| YFR032C | 28.9350912 | 27.7426596 | 30.989169  | 31.6929521 | 34.3375505 | 28.4710735 | 0.108433218 | 4.92979866 | 0.332617832 | RRT5    |
| YFL024C | 78.453554  | 80.8681261 | 80.9834144 | 83.7852857 | 83.595972  | 91.7401256 | 0.108423441 | 6.38124235 | 0.191367021 | EPL1    |
| YHR058C | 19.5969481 | 22.562495  | 21.5471566 | 21.1089252 | 24.5640541 | 23.1125721 | 0.108415211 | 4.47275435 | 0.370647043 | MED6    |
| YIL115C | 286.128595 | 235.121918 | 270.428921 | 278.082003 | 293.074577 | 282.192884 | 0.108388046 | 8.09947075 | 0.26443968  | NUP159  |
| YKL116C | 69.0496494 | 69.1839769 | 66.5782929 | 73.9699312 | 76.8848379 | 69.9187586 | 0.108284192 | 6.15078084 | 0.19705133  | PRR1    |
| YPL023C | 133.890558 | 124.726854 | 134.3671   | 141.849612 | 141.2596   | 140.41856  | 0.10819175  | 7.08959429 | 0.187838563 | MET12   |
| YNL127W | 103.640236 | 96.6388497 | 105.980537 | 103.17948  | 115.45757  | 111.495564 | 0.108188092 | 6.73028032 | 0.206083632 | APC1    |
| YDR377W | 20.2545638 | 23.310741  | 19.3682307 | 22.468884  | 24.6943674 | 20.7238426 | 0.108081837 | 4.45487364 | 0.395758744 | ATP17   |
| YMR094W | 22.2931725 | 20.0875274 | 19.5498078 | 21.8184689 | 22.4138849 | 22.4669695 | 0.10791466  | 4.42963327 | 0.361422345 | CTF13   |
| YOR363C | 61.8158766 | 65.8456486 | 62.0388638 | 65.1597635 | 68.4144744 | 70.9517227 | 0.107864131 | 6.04054938 | 0.203856819 | PIP2    |
| YDR457W | 326.177391 | 306.83842  | 327.080995 | 316.338235 | 361.423895 | 356.695421 | 0.107566933 | 8.37734525 | 0.248060042 | TOM1    |
| YCR042C | 132.312281 | 126.511133 | 133.882894 | 146.757289 | 143.01883  | 133.252371 | 0.107555424 | 7.08828319 | 0.200864379 | TAF2    |

|           |            |            |            |            |            |            |             |            |             |           |
|-----------|------------|------------|------------|------------|------------|------------|-------------|------------|-------------|-----------|
| YGR232W   | 63.131108  | 60.5503692 | 69.4835275 | 69.3578971 | 68.9357275 | 69.7896381 | 0.107425532 | 6.06595443 | 0.218923996 | NAS6      |
| YPR137W   | 94.1048079 | 94.3941116 | 93.2701357 | 94.6058272 | 101.253422 | 107.751069 | 0.107362201 | 6.60993757 | 0.203037483 | RRP9      |
| YLL001W   | 95.8803703 | 96.8115218 | 96.2964218 | 106.431556 | 102.621712 | 102.198887 | 0.107172638 | 6.64622078 | 0.177889948 | DNM1      |
| YJR132W   | 164.403927 | 150.800349 | 169.108864 | 172.359991 | 176.96544  | 172.246766 | 0.107052374 | 7.39026179 | 0.219203976 | NMD5      |
| YHR050W   | 178.805711 | 149.879431 | 171.287779 | 177.799827 | 172.534789 | 187.999469 | 0.106940994 | 7.43594091 | 0.258969305 | SFM2      |
| YBL004W   | 345.708578 | 296.535648 | 334.767762 | 322.546742 | 359.013099 | 370.575877 | 0.106905951 | 8.40211653 | 0.277411035 | UTP20     |
| YCR107W   | 26.7649593 | 26.0734955 | 28.5076145 | 29.2095492 | 31.2100316 | 27.1798683 | 0.106847436 | 4.82155563 | 0.330827667 | AAD3      |
| YBR138C   | 11.639798  | 14.3317889 | 10.8946297 | 15.4325756 | 12.7055452 | 11.5562861 | 0.106768108 | 3.68973328 | 0.540456379 | YBR138C   |
| YOR123C   | 71.2197812 | 70.9682559 | 68.4545902 | 84.8496013 | 71.3465233 | 70.4998009 | 0.106714113 | 6.19028265 | 0.255263344 | LEO1      |
| YDR485C   | 55.7000505 | 58.4207459 | 58.8310006 | 64.745863  | 66.2643052 | 55.19902   | 0.106498403 | 5.90660778 | 0.260955136 | VPS72     |
| YHR047C   | 280.933431 | 298.089698 | 288.223482 | 306.227237 | 320.049427 | 307.306825 | 0.106231825 | 8.23007296 | 0.223204451 | AAP1      |
| YHR107C   | 111.268578 | 105.848031 | 100.049016 | 120.563301 | 106.92205  | 113.755173 | 0.106056253 | 6.7794812  | 0.22259678  | CDC12     |
| YNR061C   | 68.194749  | 55.7731062 | 66.9414472 | 64.9232489 | 69.5221373 | 70.9517227 | 0.106039003 | 6.04771949 | 0.277463884 | YNR061C   |
| YKL010C   | 149.410289 | 151.836382 | 145.382781 | 164.909783 | 160.024713 | 155.719341 | 0.105986766 | 7.27306356 | 0.197600922 | UFD4      |
| YPL052W   | 8.61476578 | 13.5259855 | 8.71570379 | 10.5840269 | 12.0539788 | 10.6524424 | 0.105954333 | 3.43696246 | 0.587328821 | OAZ1      |
| YBR038W   | 228.718743 | 184.01096  | 230.966151 | 212.803983 | 240.297697 | 239.583115 | 0.10591217  | 7.79977112 | 0.32027756  | CHS2      |
| YMR137C   | 18.8078093 | 15.9433957 | 17.3708819 | 17.9751072 | 19.3515228 | 18.7224746 | 0.105830636 | 4.18084032 | 0.420217109 | PSO2      |
| YNR029C   | 46.427669  | 47.5424001 | 47.694268  | 53.7479356 | 51.4737474 | 47.1935481 | 0.105824139 | 5.61886956 | 0.248141287 | YNR029C   |
| YBR024W   | 16.243108  | 20.317757  | 16.4024703 | 19.6307091 | 18.1135465 | 19.3035169 | 0.105749829 | 4.20725394 | 0.434750178 | SCO2      |
| YBL103C   | 40.3776045 | 41.4413173 | 36.2549068 | 40.4439911 | 43.0587937 | 43.0616916 | 0.105712745 | 5.35676925 | 0.279171617 | RTG3      |
| YJR077C   | 546.215608 | 423.679912 | 523.789588 | 530.797819 | 531.156948 | 545.082252 | 0.105634818 | 9.01370503 | 0.317823723 | MIR1      |
| YLR154W-B | 9.27238149 | 5.00749251 | 9.26043528 | 6.85892247 | 5.53831459 | 12.9120515 | 0.105550387 | 3.04144997 | 0.741182721 | YLR154W-B |
| YCL034W   | 92.9210996 | 88.9837174 | 92.120147  | 104.775954 | 96.4969872 | 93.4186923 | 0.105424273 | 6.56850041 | 0.211782634 | LSB5      |
| YIL017C   | 67.4056101 | 66.8816815 | 65.3677785 | 75.3890186 | 72.5193428 | 66.8198663 | 0.105420849 | 6.11246844 | 0.221723051 | VID28     |
| YLL038C   | 26.4361515 | 21.814249  | 24.2102883 | 26.7261462 | 26.2581268 | 24.855699  | 0.105166891 | 4.6531506  | 0.375825431 | ENT4      |
| YDL073W   | 132.70685  | 121.100738 | 134.548677 | 141.140068 | 140.608034 | 135.834781 | 0.104958391 | 7.07080422 | 0.214119308 | YDL073W   |
| YOR048C   | 156.5783   | 147.001562 | 170.01675  | 166.32887  | 174.228861 | 168.760512 | 0.104927745 | 7.35696737 | 0.239687182 | RAT1      |
| YDL109C   | 27.6198598 | 26.2461676 | 27.6602544 | 27.3174326 | 29.9068988 | 30.4724414 | 0.104875899 | 4.82351514 | 0.327053859 | YDL109C   |
| YNL018C   | 1.90708556 | 2.07206587 | 1.4526173  | 1.89211654 | 2.34563912 | 1.61400643 | 0.104864238 | 1.00238382 | 0.773364508 | YNL018C   |
| YML032C   | 64.3805779 | 69.0688622 | 66.6388186 | 71.6639141 | 73.8876323 | 69.6605176 | 0.104669571 | 6.11565622 | 0.210752055 | RAD52     |
| YLR262C   | 13.6784067 | 17.7276746 | 14.0419672 | 17.3246921 | 16.5497871 | 15.0425399 | 0.104654384 | 3.98799636 | 0.478965727 | YPT6      |
| YGL164C   | 23.8714502 | 27.051971  | 22.2734653 | 29.4460637 | 26.3884401 | 22.8543311 | 0.104650526 | 4.66977146 | 0.422663358 | YBR30     |
| YEL052W   | 124.026323 | 109.243917 | 115.785704 | 128.368282 | 116.04398  | 130.734521 | 0.104500196 | 6.91665003 | 0.241157506 | AFG1      |
| YNR053C   | 135.403074 | 137.159249 | 143.264381 | 145.338202 | 143.670396 | 157.97895  | 0.104115323 | 7.16914356 | 0.21765798  | NOG2      |
| YOR104W   | 20.4518485 | 24.4043313 | 20.3971679 | 25.7209593 | 22.2835717 | 22.1441682 | 0.104068743 | 4.50509875 | 0.414196249 | PIN2      |
| YNL083W   | 35.9715793 | 36.7791691 | 31.5944263 | 36.3049862 | 34.4678638 | 41.3831249 | 0.103957931 | 5.17800559 | 0.344578132 | SAL1      |
| YCL023C   | 0.460331   | 0.57557385 | 0.24210288 | 0.59128642 | 0.26062657 | 0.51648206 | 0.103884167 | -0.8168629 | 1           | YCL023C   |
| YJR039W   | 32.8807854 | 38.563448  | 36.3759582 | 41.449178  | 36.9438162 | 37.5095095 | 0.10381221  | 5.22599081 | 0.317809292 | YJR039W   |
| YPL162C   | 41.0352202 | 32.6925948 | 37.5864726 | 40.6805057 | 39.2242986 | 39.5754377 | 0.103771567 | 5.26953592 | 0.331647352 | YPL162C   |
| YNR023W   | 36.2346255 | 42.4773502 | 40.9153873 | 42.276979  | 42.7427573 | 43.6427339 | 0.103725116 | 5.3754694  | 0.286675448 | SNF12     |
| YHR100C   | 21.8986031 | 17.2096582 | 21.0024251 | 20.9315393 | 23.3912346 | 20.2073605 | 0.103686044 | 4.38391718 | 0.441108122 | GEP4      |
| YJL198W   | 228.324174 | 182.859813 | 240.952894 | 206.122446 | 237.756588 | 256.756143 | 0.103514097 | 7.81732908 | 0.379079581 | PHO90     |
| YPR058W   | 43.9944909 | 40.6355139 | 49.207411  | 45.4107971 | 49.3235782 | 49.0657955 | 0.103431485 | 5.33557093 | 0.300653365 | YMC1      |
| YNR039W   | 70.036073  | 71.140928  | 73.5387508 | 83.3122566 | 73.3404523 | 73.3404523 | 0.103428625 | 6.21629662 | 0.235879489 | BDP1      |
| YKR038C   | 96.8010323 | 99.0562598 | 97.0832562 | 103.002094 | 103.012651 | 108.719473 | 0.103335834 | 6.66390477 | 0.197213966 | KAE1      |
| YJR065C   | 426.266502 | 332.509014 | 410.18281  | 393.560241 | 415.894848 | 446.175938 | 0.103279315 | 8.65890022 | 0.33985762  | ARP3      |
| YNL225C   | 26.5019131 | 30.044955  | 27.5997287 | 30.392122  | 30.3629953 | 29.6977183 | 0.103235071 | 4.8693523  | 0.325760579 | CNM67     |
| YER034W   | 11.179467  | 11.8568213 | 10.2288468 | 9.51971136 | 14.204148  | 12.0727681 | 0.103171124 | 3.53832277 | 0.553328222 | YER034W   |
| YKL039W   | 235.097616 | 212.271636 | 222.49255  | 260.166025 | 228.764971 | 230.415558 | 0.103118971 | 7.85584604 | 0.272798373 | PTM1      |
| YOR330C   | 180.581274 | 157.534563 | 183.937665 | 178.50937  | 192.733348 | 189.419795 | 0.103033558 | 7.49631906 | 0.27055999  | MIP1      |
| YDL242W   | 2.36741655 | 2.07206587 | 2.11840023 | 2.48340296 | 2.08501255 | 2.45328978 | 0.103009313 | 1.25434421 | 0.748746446 | YDL242W   |
| YOL141W   | 27.5540982 | 26.7641841 | 29.3549746 | 26.2531171 | 30.7539351 | 32.9257312 | 0.102996364 | 4.8600895  | 0.375947946 | PPM2      |
| YFR046C   | 10.5876129 | 9.38185378 | 10.8946297 | 10.9387988 | 12.1191355 | 10.0714001 | 0.102946308 | 3.43042238 | 0.516117321 | CNN1      |
| YDL002C   | 16.0458233 | 16.3462974 | 15.2524816 | 20.2219956 | 17.0058836 | 13.8804553 | 0.102835455 | 4.05273616 | 0.517178386 | NHP10     |
| YLR387C   | 54.713627  | 61.2986152 | 51.6284398 | 63.8589334 | 59.9441109 | 56.2319841 | 0.102800468 | 5.85997914 | 0.285856899 | REH1      |
| YBL022C   | 265.874031 | 245.194461 | 266.313171 | 294.874538 | 274.244307 | 265.536338 | 0.102741846 | 8.07035832 | 0.261559404 | PIM1      |
| YMR182C   | 18.8735708 | 14.1015594 | 17.1893047 | 18.1524931 | 18.5044864 | 17.1084682 | 0.102339961 | 4.12331585 | 0.478558225 | RGM1      |
| YBR212W   | 143.689032 | 114.539196 | 139.814415 | 128.42741  | 143.800709 | 155.009178 | 0.102261627 | 7.10475205 | 0.332240618 | NGR1      |
| YKL088W   | 51.030979  | 47.8301871 | 52.6573771 | 59.8973144 | 51.4737474 | 51.1317238 | 0.10205806  | 5.71329006 | 0.296459259 | CAB3      |
| YOR102W   | 32.0916466 | 29.6996107 | 34.5601866 | 27.6722045 | 37.3032259 | 38.2842326 | 0.102022166 | 5.06193153 | 0.436556534 | YOR102W   |
| YIL007C   | 8.94357364 | 14.1015594 | 10.6525269 | 13.776937  | 10.2947495 | 12.1373284 | 0.102011308 | 3.56145093 | 0.603362366 | NAS2      |
| YML029W   | 94.8281852 | 95.8906036 | 93.875393  | 97.7987739 | 105.74923  | 101.940646 | 0.101927867 | 6.62151536 | 0.208490013 | USA1      |
| YIL160C   | 10.9821823 | 8.80627993 | 11.8025156 | 12.2396289 | 11.5327257 | 10.0714001 | 0.101875376 | 3.46266239 | 0.556674576 | POT1      |
| YGR125W   | 155.000023 | 130.655264 | 148.711696 | 155.922229 | 155.007652 | 155.073738 | 0.101813777 | 7.23045075 | 0.256116145 | YGR125W   |
| YCL002C   | 39.8515119 | 39.1965793 | 46.4837536 | 42.276979  | 45.0883964 | 47.3872288 | 0.101685586 | 5.44282718 | 0.317992279 | YCL002C   |
| YFR044C   | 904.616169 | 678.313784 | 831.683929 | 888.407846 | 823.645115 | 878.729662 | 0.101680223 | 9.7044816  | 0.362683424 | DUG1      |
| YLL061W   | 42.8107826 | 34.3617589 | 40.7943358 | 43.1639087 | 42.8421308 | 40.8020826 | 0.101621609 | 5.35207287 | 0.339208288 | MMP1      |
| YOR116C   | 347.944471 | 296.190304 | 353.288632 | 316.811264 | 370.871608 | 382.519524 | 0.101599524 | 8.4291961  | 0.338254351 | RP031     |
| YKL212W   | 336.238912 | 328.998013 | 312.796925 | 354.357952 | 336.990154 | 357.986627 | 0.10157462  | 8.40094008 | 0.25199774  | SAC1      |
| YNL281W   | 60.9609762 | 77.5297978 | 57.9836405 | 86.8599751 | 67.0461849 | 56.8775866 | 0.101567385 | 6.08829365 | 0.481876192 | HCH1      |
| YDR527W   | 54.713627  | 52.2621057 | 58.0441662 | 59.956443  | 57.2726885 | 59.7827982 | 0.101548924 | 5.83606955 | 0.245221377 | RBA50     |
| YLR127C   | 44.2575372 | 50.7080563 | 45.8179706 | 49.7863166 | 49.8448313 | 51.5190853 | 0.101494449 | 5.60835447 | 0.269306994 | APC2      |
| YLL024C   | 7257.24968 | 5630.1483  | 6376.98994 | 7291.56675 | 6896.5048  | 6478.4927  | 0.101373803 | 12.7002799 | 0.353415626 | SSA2      |



|           |            |            |            |            |            |            |             |            |             |           |
|-----------|------------|------------|------------|------------|------------|------------|-------------|------------|-------------|-----------|
| YJL162C   | 16.243108  | 20.8357734 | 18.3392934 | 19.2759373 | 18.3090165 | 21.9504875 | 0.101274458 | 4.27000704 | 0.466100255 | JJJ2      |
| YDL155W   | 52.2804488 | 59.0538772 | 52.9600057 | 63.6815474 | 59.8789542 | 52.6811699 | 0.101194954 | 5.83019403 | 0.305056408 | CLB3      |
| YBL074C   | 18.9393324 | 18.1881337 | 17.2498304 | 18.5072649 | 20.589499  | 19.2389567 | 0.101184923 | 4.24024054 | 0.419188909 | AAR2      |
| YIL048W   | 169.730614 | 145.620184 | 150.527468 | 163.786338 | 167.582884 | 167.985789 | 0.10042124  | 7.33071643 | 0.263903625 | NEO1      |
| YOR071C   | 82.136202  | 69.2990917 | 79.8334257 | 78.6410939 | 81.967056  | 87.2209076 | 0.100178314 | 6.32108272 | 0.277285616 | NRT1      |
| YGR003W   | 41.5613128 | 45.7581212 | 42.489056  | 46.5933699 | 46.1960594 | 46.418825  | 0.100173769 | 5.49069465 | 0.267414958 | CUL3      |
| YGL026C   | 475.98225  | 403.074368 | 498.792465 | 487.279139 | 490.890143 | 498.663427 | 0.100160487 | 8.89447892 | 0.315932791 | TRP5      |
| YOR285W   | 162.957173 | 147.69225  | 156.216885 | 183.771819 | 156.962351 | 159.528396 | 0.100140128 | 7.3337194  | 0.284479031 | RDL1      |
| YDL031W   | 221.484971 | 214.804161 | 225.216207 | 235.56851  | 237.821744 | 235.644939 | 0.10013394  | 7.83631104 | 0.24386824  | DBP10     |
| YPR048W   | 52.8065414 | 56.6940244 | 54.4731487 | 57.0000109 | 61.0517738 | 57.7814303 | 0.099986788 | 5.82672515 | 0.245664614 | TAH18     |
| YHR079C   | 117.187119 | 107.920097 | 116.148858 | 121.272845 | 123.99309  | 120.40488  | 0.099926147 | 6.88184672 | 0.222377552 | IRE1      |
| YGR270W   | 197.021666 | 178.715681 | 189.929712 | 207.364148 | 202.897784 | 195.875821 | 0.099924436 | 7.61040809 | 0.259784254 | YTA7      |
| YOR056C   | 78.6508388 | 83.2279789 | 79.5913228 | 89.6981499 | 84.7687916 | 84.315696  | 0.099878481 | 6.38378434 | 0.222088892 | NOB1      |
| YLR326W   | 8.94357364 | 9.26673901 | 8.71570379 | 11.234442  | 9.44771313 | 8.13459242 | 0.099811571 | 3.23644057 | 0.569695121 | YLR326W   |
| YNL135C   | 194.785773 | 161.390908 | 169.774647 | 206.240703 | 178.203417 | 178.961033 | 0.099737708 | 7.50522099 | 0.326862341 | FPR1      |
| YER047C   | 59.9087911 | 57.1544834 | 58.9520521 | 63.4450329 | 63.9838227 | 61.1385636 | 0.099733268 | 5.9279402  | 0.235073868 | SAP1      |
| YGL110C   | 49.0581319 | 47.2546132 | 48.9653081 | 55.167023  | 52.3207837 | 48.0973917 | 0.099633711 | 5.65158503 | 0.280517854 | CUE3      |
| YDL029W   | 266.860455 | 284.563712 | 266.918429 | 305.281179 | 286.428599 | 285.098096 | 0.099551687 | 8.14290124 | 0.262343435 | ARP2      |
| YGL104C   | 39.2596578 | 36.9518413 | 40.6127587 | 45.4107971 | 38.985154  | 40.7375223 | 0.09929099  | 5.33767389 | 0.327861679 | VPS73     |
| YPR016C   | 261.007675 | 199.090995 | 251.605421 | 257.032207 | 237.756588 | 267.473146 | 0.099260597 | 7.9411278  | 0.368685592 | TF6       |
| YPL256C   | 218.657223 | 207.436816 | 214.98736  | 205.708546 | 233.391093 | 247.653147 | 0.09917057  | 7.79057698 | 0.298726053 | CLN2      |
| YER007W   | 14.9278766 | 15.0224775 | 13.1946071 | 15.8464761 | 14.9208711 | 15.4299015 | 0.099146281 | 3.90819772 | 0.464141506 | PAC2      |
| YJR008W   | 16.3746311 | 18.533478  | 17.1893047 | 20.3993815 | 16.3543172 | 19.0452759 | 0.09913212  | 4.17952623 | 0.466686732 | MHO1      |
| YPL009C   | 188.012331 | 176.183156 | 187.327106 | 219.367262 | 191.104432 | 180.123118 | 0.099068755 | 7.5735102  | 0.308676828 | RQC2      |
| YOL138C   | 80.6236859 | 69.8171082 | 75.8387282 | 76.4533341 | 83.6611287 | 82.1852075 | 0.099004745 | 6.28909986 | 0.262597038 | RTC1      |
| YGR182C   | 7.8913885  | 10.0725424 | 8.47360091 | 8.92842494 | 9.18708656 | 10.2650809 | 0.098813743 | 3.21187143 | 0.567095304 | YGR182C   |
| YOR350C   | 34.9851557 | 37.9878742 | 37.5259469 | 37.487559  | 40.0061783 | 40.9312031 | 0.098711528 | 5.25835842 | 0.305786017 | MNE1      |
| YDR243C   | 28.4089986 | 26.2461676 | 29.476026  | 27.6722045 | 28.1476695 | 34.2814966 | 0.098694096 | 4.86536937 | 0.406734574 | PRP28     |
| YLL029W   | 147.568965 | 146.944004 | 156.337937 | 163.963724 | 156.375941 | 162.369047 | 0.098552101 | 7.28278022 | 0.23671433  | FRA1      |
| YGL244W   | 85.81885   | 80.0047653 | 88.0649238 | 101.405621 | 88.4827202 | 81.797846  | 0.098483604 | 6.45492013 | 0.305036692 | RTF1      |
| YLR113W   | 286.260118 | 257.223954 | 261.95532  | 300.669145 | 286.819539 | 274.639334 | 0.098333971 | 8.11917071 | 0.282742094 | HOG1      |
| YMR091C   | 90.7509678 | 83.4582085 | 90.4254269 | 98.0944171 | 90.3071062 | 94.7744577 | 0.098265227 | 6.51445833 | 0.243838021 | NPL6      |
| YGR047C   | 77.0725611 | 77.8175847 | 76.080831  | 90.8807228 | 79.230477  | 77.0203869 | 0.098132805 | 6.31861441 | 0.27212372  | TFC4      |
| YJL091C   | 92.5265302 | 83.1128641 | 95.0859074 | 90.7033368 | 92.0011789 | 107.040907 | 0.098016753 | 6.54719275 | 0.301305898 | GWT1      |
| YIR012W   | 194.720011 | 181.248206 | 201.066444 | 199.086138 | 196.57759  | 221.893604 | 0.097949166 | 7.63815524 | 0.291790276 | SQT1      |
| YMR304W   | 119.488774 | 102.739932 | 109.006823 | 127.658738 | 116.23945  | 110.39804  | 0.097850227 | 6.83760081 | 0.289572668 | UBP15     |
| YDL277C   | 75.9546144 | 85.933176  | 78.683437  | 90.9989801 | 86.5280209 | 79.9255985 | 0.09763992  | 6.37747319 | 0.272627387 | YSH1      |
| YBR234C   | 289.416673 | 240.992772 | 273.334155 | 272.701297 | 275.677753 | 311.503241 | 0.097522903 | 8.11567816 | 0.332070106 | ARC40     |
| YGL218W   | 10.5876129 | 14.9073628 | 9.86569249 | 12.4761435 | 12.8358585 | 12.5892502 | 0.097482375 | 3.62614513 | 0.577317009 | YGL218W   |
| YDR185C   | 8.28595793 | 9.6696407  | 9.44201244 | 8.63278173 | 10.2295928 | 10.5233219 | 0.097376259 | 3.2607893  | 0.55772566  | UPS3      |
| YHL025W   | 61.5528303 | 57.9027295 | 55.2599831 | 63.7998047 | 60.2698941 | 62.7525701 | 0.097341254 | 5.91586317 | 0.26474585  | SNF6      |
| YDR538W   | 20.1888023 | 17.9579042 | 18.8234992 | 19.0394227 | 20.394029  | 21.4985657 | 0.097328683 | 4.30445438 | 0.437745637 | PAD1      |
| YBR168W   | 27.882906  | 27.1095284 | 26.5707914 | 29.564321  | 29.0598624 | 28.600194  | 0.097314303 | 4.82026523 | 0.349275159 | PXK32     |
| YGL181W   | 69.115411  | 63.658468  | 62.0993895 | 78.286322  | 65.6127388 | 64.3665765 | 0.097032138 | 6.07291043 | 0.326241541 | GTS1      |
| YNL322C   | 303.358126 | 260.274496 | 294.397106 | 242.95959  | 320.37521  | 354.371252 | 0.096930604 | 8.20964996 | 0.443460197 | KRE1      |
| YER098W   | 22.7535035 | 21.1235603 | 24.936597  | 23.8288427 | 25.8020303 | 23.9518554 | 0.09668658  | 4.57578959 | 0.413478777 | UBP9      |
| YIL047C-A | 18.1501936 | 15.0224775 | 15.0709045 | 21.0497966 | 16.2240039 | 14.2032566 | 0.096679692 | 4.06594506 | 0.571652132 | YIL047C-A |
| YOL125W   | 54.713627  | 50.7656137 | 55.8047146 | 59.8973144 | 57.5984718 | 54.8762187 | 0.096660488 | 5.80037886 | 0.279867436 | TRM13     |
| YJL033W   | 126.985593 | 128.9861   | 134.064472 | 126.71268  | 136.698635 | 153.717973 | 0.096550639 | 7.072966   | 0.292398987 | HCA4      |
| YMR320W   | 2.10437027 | 2.30229541 | 3.02628604 | 3.07468938 | 2.9320489  | 1.93680772 | 0.09650287  | 1.42911232 | 0.755262836 | YMR320W   |
| YDR392W   | 18.3474783 | 19.7997405 | 20.3971679 | 24.5975151 | 20.3288724 | 17.6249502 | 0.096491436 | 4.34516095 | 0.500020848 | SPT3      |
| YMR009W   | 17.5583394 | 20.4328717 | 18.218242  | 21.5819543 | 20.0682458 | 18.4642336 | 0.096429536 | 4.28716523 | 0.457045201 | ADI1      |
| YDR199W   | 4.99787939 | 5.69818113 | 5.02363483 | 5.79460692 | 5.53831459 | 5.48762187 | 0.096244854 | 2.47292749 | 0.621604172 | YDR199W   |
| YOR042W   | 84.2405723 | 78.7385029 | 80.3176315 | 92.5954534 | 86.0719244 | 81.2813639 | 0.096226071 | 6.39226646 | 0.263618082 | CUE5      |
| YER024W   | 35.6427714 | 34.1890868 | 34.5601866 | 38.3744887 | 36.2922497 | 36.8639069 | 0.096174325 | 5.17426704 | 0.314461313 | YAT2      |
| YNL263C   | 160.918564 | 129.273887 | 155.551102 | 155.981358 | 155.463748 | 164.886897 | 0.096106876 | 7.26474383 | 0.321048707 | YIF1      |
| YGL133W   | 98.9054026 | 94.7394559 | 96.901679  | 104.243796 | 103.990001 | 102.263448 | 0.096033104 | 6.64806254 | 0.227952011 | ITC1      |
| YLR314C   | 176.964387 | 168.297794 | 181.819265 | 201.392155 | 183.546261 | 178.315431 | 0.09601042  | 7.50659225 | 0.288399005 | CDC3      |
| YPL094C   | 238.846025 | 204.328717 | 232.358242 | 240.476187 | 237.495961 | 243.908652 | 0.095936471 | 7.86425505 | 0.30251209  | SEC62     |
| YFR037C   | 213.133251 | 183.435386 | 194.287564 | 220.549835 | 202.702314 | 208.013149 | 0.095788046 | 7.67101653 | 0.304595304 | RSR8      |
| YHR007C   | 933.222452 | 759.527254 | 874.596665 | 947.950389 | 904.048411 | 891.383472 | 0.09575388  | 9.78990813 | 0.341905968 | ERG11     |
| YDR328C   | 65.2354783 | 63.370681  | 61.0099266 | 67.69725   | 67.3068115 | 54.4242969 | 0.095680334 | 6.03323566 | 0.431960677 | SKP1      |
| YFL029C   | 22.8219804 | 23.3682984 | 21.9103109 | 24.1244859 | 23.3260779 | 25.1139401 | 0.095583203 | 4.55665947 | 0.395827826 | CAK1      |
| YHR066W   | 67.734418  | 72.7525348 | 74.0834823 | 80.0010526 | 77.2757777 | 71.9846868 | 0.095417069 | 6.21147244 | 0.2671429   | SSF1      |
| YML075C   | 252.064101 | 207.321701 | 254.268553 | 243.018719 | 258.28093  | 261.01712  | 0.095290477 | 7.94308149 | 0.344052918 | HMG1      |
| YGR086C   | 664.652197 | 615.748906 | 608.707174 | 714.924411 | 665.249318 | 637.726221 | 0.095230695 | 9.34715327 | 0.309361536 | PIL1      |
| YNL021W   | 72.5350127 | 71.8316167 | 80.5597344 | 79.0549944 | 79.7517301 | 81.4750447 | 0.095131183 | 6.27900457 | 0.260971728 | HDA1      |
| YKR049C   | 12.8235063 | 15.3102644 | 14.9498515 | 16.7925343 | 15.7480515 | 15.4944617 | 0.095095284 | 3.90620636 | 0.523760032 | FMP46     |
| YLR378C   | 609.017908 | 475.481559 | 624.807016 | 564.560274 | 619.639668 | 641.470716 | 0.095057108 | 9.20275395 | 0.403750935 | SEC61     |
| YOL062C   | 102.390766 | 96.4086201 | 99.2621821 | 104.657696 | 101.253422 | 112.399408 | 0.095014118 | 6.68430922 | 0.255398636 | APM4      |
| YDL243C   | 20.6491333 | 16.9218712 | 19.6708593 | 21.2863111 | 20.3288724 | 19.4326374 | 0.094986157 | 4.30954496 | 0.468700128 | AAD4      |
| YMR117C   | 14.2702609 | 14.1591167 | 15.3130074 | 18.5663936 | 14.5950879 | 13.4930938 | 0.094898588 | 3.9263439  | 0.544608024 | SPC24     |
| YIL061C   | 17.6898626 | 17.3823303 | 16.2814189 | 15.0778037 | 20.4591857 | 19.3680772 | 0.094832164 | 4.15493745 | 0.518997271 | SNP1      |

|           |            |            |            |            |            |            |             |            |             |           |
|-----------|------------|------------|------------|------------|------------|------------|-------------|------------|-------------|-----------|
| YDL095W   | 889.556769 | 704.387279 | 844.757485 | 848.555141 | 849.447145 | 906.232331 | 0.094804083 | 9.71525718 | 0.366684869 | PMT1      |
| YDR189W   | 132.641088 | 149.879431 | 135.759192 | 136.350648 | 153.639362 | 156.752305 | 0.094438705 | 7.1728304  | 0.300778419 | SLY1      |
| YCR094W   | 51.4255484 | 56.8666965 | 51.386337  | 61.3164018 | 54.8618928 | 54.2951764 | 0.094429516 | 5.78559196 | 0.311973928 | CDC50     |
| YER104W   | 4.66907153 | 5.46795159 | 5.26573771 | 5.2033205  | 5.47315795 | 5.81042315 | 0.094344557 | 2.44369125 | 0.599448033 | RTT105    |
| YKL117W   | 169.467568 | 187.521961 | 170.198327 | 198.021822 | 186.347997 | 178.444551 | 0.094292515 | 7.50622051 | 0.298890464 | SBA1      |
| YLR154C-G | 7.03648808 | 2.18718064 | 4.23680046 | 7.56846618 | 2.47595241 | 4.26097698 | 0.094191322 | 2.24611879 | 0.842995055 | YLR154C-G |
| YNL290W   | 70.8252118 | 58.3056311 | 64.157264  | 76.3350768 | 66.0688353 | 63.7209739 | 0.094149012 | 6.05933805 | 0.360053408 | RFC3      |
| YCR052W   | 91.8689145 | 95.5452593 | 100.412171 | 99.3361186 | 101.970145 | 106.007942 | 0.094141604 | 6.63388814 | 0.255232778 | RSC6      |
| YHR149C   | 95.0912315 | 87.8901271 | 98.7174506 | 88.5155771 | 102.947495 | 109.235955 | 0.093884464 | 6.60242414 | 0.329118379 | SKG6      |
| YER190W   | 85.7530884 | 71.1984854 | 90.6675298 | 95.4336282 | 77.2106211 | 91.4818845 | 0.093858702 | 6.41634475 | 0.390789741 | YRF1-2    |
| YBR117C   | 19.3996634 | 17.1521008 | 21.3655794 | 18.5663936 | 21.6971619 | 21.5631259 | 0.093846472 | 4.32657454 | 0.486963766 | TKL2      |
| YIL151C   | 152.435321 | 145.332397 | 141.024929 | 154.798785 | 153.378736 | 160.044878 | 0.093787766 | 7.2411196  | 0.257573621 | ESL1      |
| YOR052C   | 19.3996634 | 24.807233  | 17.9156134 | 23.119299  | 23.9776444 | 19.2389567 | 0.093545343 | 4.42948761 | 0.52743331  | TMC1      |
| YNR034W   | 25.7127742 | 24.2316591 | 25.7234313 | 28.2634909 | 26.8445366 | 25.5658619 | 0.093484104 | 4.71036255 | 0.396134726 | SOL1      |
| YPL030W   | 81.6101094 | 84.7244709 | 82.5570832 | 82.9574847 | 91.0889859 | 91.6110051 | 0.093472285 | 6.42415789 | 0.26091751  | TRM44     |
| YOL060C   | 166.508297 | 138.713298 | 151.919559 | 156.395258 | 163.738642 | 167.469307 | 0.093350731 | 7.29974858 | 0.311145015 | MAM3      |
| YMR119W   | 134.876982 | 117.647295 | 125.711922 | 138.301894 | 132.789237 | 132.283967 | 0.093347851 | 7.02659739 | 0.277226846 | ASI1      |
| YJL087C   | 48.5978009 | 53.4708108 | 49.6310911 | 56.5861104 | 52.7768802 | 52.4874892 | 0.093250541 | 5.71125246 | 0.301193441 | TRL1      |
| YKL207W   | 161.510418 | 136.008101 | 153.493228 | 143.859986 | 165.823655 | 171.407483 | 0.093198568 | 7.28026963 | 0.344830786 | EMC3      |
| YJL019W   | 67.1425639 | 66.7090094 | 67.425653  | 68.5300961 | 67.5590547 | 69.6605176 | 0.093136854 | 6.11796297 | 0.275597528 | MPS3      |
| YIL156W   | 92.3950071 | 85.8180612 | 94.4806502 | 96.0840433 | 94.8680711 | 99.874718  | 0.093106414 | 6.55513123 | 0.262409654 | UBP7      |
| YDL129W   | 20.6491333 | 19.6270683 | 20.8813737 | 18.0933645 | 20.7198122 | 26.4697055 | 0.093105141 | 4.40449622 | 0.524555544 | YDL129W   |
| YIL046W   | 80.9524937 | 76.4937649 | 77.2913455 | 82.6027129 | 85.9416111 | 81.797846  | 0.093073321 | 6.33916156 | 0.253640457 | MET30     |
| YKR063C   | 25.9100589 | 32.6350374 | 30.141809  | 34.8267701 | 29.8417422 | 29.9559594 | 0.092860049 | 4.9401145  | 0.438230614 | LAS1      |
| YFL061W   | 2.56470126 | 2.35985279 | 2.0587451  | 2.01037383 | 3.25783211 | 2.19504875 | 0.092802376 | 1.33471145 | 0.73900385  | DDI2      |
| YOR130C   | 15.1909229 | 18.1305763 | 16.5840475 | 17.6203353 | 17.2665102 | 18.3996733 | 0.092758425 | 4.1151902  | 0.477678564 | ORT1      |
| YMR135W-A | 1.44675456 | 0.69068862 | 0.78683437 | 0.94605827 | 1.04250628 | 1.09752437 | 0.092665353 | 0.15887945 | 0.867321772 | YMR135W-A |
| YFL013C   | 60.3033605 | 58.9387624 | 59.7994121 | 63.7406761 | 59.9441109 | 67.2072278 | 0.092652504 | 5.94896636 | 0.282078537 | IES1      |
| YNL072W   | 37.3525723 | 35.1675623 | 37.5864726 | 41.5083067 | 35.70584   | 40.0919198 | 0.09241231  | 5.24893228 | 0.363197041 | RNH201    |
| YOR142W   | 297.176539 | 229.251065 | 263.105308 | 293.337193 | 270.660692 | 277.415425 | 0.092117097 | 8.08708942 | 0.379708105 | LSC1      |
| YDR003W   | 24.7921122 | 25.8432659 | 25.1181741 | 28.3817482 | 27.5612597 | 24.7911388 | 0.092068629 | 4.7120398  | 0.408338622 | RCR2      |
| YOR022C   | 30.3160842 | 29.3542664 | 29.4550023 | 34.2946124 | 31.118044  |            | 0.091889596 | 4.94419189 | 0.389713843 | YOR022C   |
| YHR163W   | 178.608426 | 161.621137 | 171.227264 | 186.255222 | 179.962646 | 178.767352 | 0.09187878  | 7.46098327 | 0.292554167 | SOL3      |
| YDR257C   | 39.2596578 | 42.7651372 | 39.2206671 | 50.7915035 | 39.0939854 | 39.2526364 | 0.091775223 | 5.38805565 | 0.432514742 | RKM4      |
| YLL062C   | 6.70768023 | 9.49696855 | 7.98939514 | 9.16493951 | 8.47036349 | 8.19915267 | 0.091740448 | 3.08389014 | 0.596040671 | MHT1      |
| YJL128C   | 93.3156691 | 96.984194  | 94.4806502 | 95.0197277 | 101.057952 | 107.492828 | 0.091711328 | 6.61729097 | 0.275620024 | PBS2      |
| YOR274W   | 24.0687349 | 26.5339546 | 23.9681854 | 26.9626608 | 26.6490667 | 25.8886632 | 0.09169309  | 4.68969752 | 0.404354226 | MOD5      |
| YLR208W   | 226.48285  | 262.346561 | 245.250221 | 272.937812 | 258.997653 | 250.364678 | 0.091670208 | 7.98224042 | 0.327104349 | SEC13     |
| YOR002W   | 212.935966 | 161.621137 | 196.950695 | 184.067463 | 209.543762 | 215.308458 | 0.091636222 | 7.62078109 | 0.412773057 | ALG6      |
| YMR297W   | 1269.19832 | 956.603741 | 1156.88863 | 1226.74194 | 1159.26698 | 1218.05837 | 0.091514069 | 10.1855697 | 0.407527203 | PRC1      |
| YLR091W   | 24.7263506 | 21.5840194 | 22.4550424 | 23.296685  | 23.2609213 | 26.6633862 | 0.091306505 | 4.57126628 | 0.451317583 | GEP5      |
| YMR048W   | 15.9143001 | 16.0585105 | 16.3419446 | 18.8029082 | 16.6149438 | 16.0109438 | 0.091209935 | 4.06646026 | 0.49957333  | CSC3      |
| YDR057W   | 40.1145582 | 41.9017764 | 43.3969418 | 48.071586  | 43.9807335 | 41.5122454 | 0.091183443 | 5.43615844 | 0.345864356 | YOM9      |
| YMR095C   | 10.7191361 | 11.9143787 | 12.7709271 | 12.6535294 | 11.3337558 | 13.7513348 | 0.09116116  | 3.62296563 | 0.558767941 | SN01      |
| YLR421C   | 43.3368752 | 46.8517115 | 45.3942906 | 53.9253215 | 49.3235782 | 41.1248839 | 0.090978356 | 5.54837706 | 0.403236166 | RPN13     |
| YDR348C   | 121.39586  | 102.855047 | 125.227716 | 121.509359 | 121.517138 | 129.120515 | 0.090976365 | 6.9114368  | 0.330761925 | PAL1      |
| YLR249W   | 7800.04568 | 6347.25576 | 7640.40384 | 7755.9631  | 7838.47438 | 7610.68593 | 0.090935737 | 12.8724648 | 0.375115477 | YEF3      |
| YJL178C   | 99.3657336 | 109.243917 | 98.8385021 | 115.005209 | 112.134581 | 100.32664  | 0.090917996 | 6.72726987 | 0.30553607  | ATG27     |
| YER180C-A | 1.64403927 | 1.38137724 | 1.39209158 | 2.06950247 | 1.43344613 | 1.16208463 | 0.090889015 | 0.71456514 | 0.844661019 | SLO1      |
| YEL056W   | 63.9860085 | 67.4572554 | 56.5310232 | 67.4066519 | 63.0064731 | 69.7896381 | 0.090871017 | 6.01838844 | 0.334286114 | HAT2      |
| YPL093W   | 395.555849 | 459.365491 | 421.682697 | 460.730379 | 451.731001 | 447.208902 | 0.090849825 | 8.77976431 | 0.327884742 | NOG1      |
| YEL061C   | 60.1060758 | 57.7300573 | 62.8862239 | 61.1981445 | 68.2190044 | 63.0753713 | 0.090783144 | 5.9615254  | 0.299627129 | CIN8      |
| YML074C   | 299.609717 | 301.370469 | 274.302567 | 378.718952 | 297.049132 | 256.239661 | 0.090763155 | 8.23534714 | 0.46997116  | FPR3      |
| YIL029C   | 2.95927069 | 3.56855788 | 3.08681176 | 3.07468938 | 4.23518175 | 2.96977183 | 0.090728994 | 1.78182954 | 0.694486077 | YIL029C   |
| YPL193W   | 30.2503226 | 28.6635778 | 31.1102205 | 32.4616245 | 30.8190918 | 32.5383697 | 0.090593486 | 4.9585702  | 0.375145332 | RSA1      |
| YGL059W   | 13.4153605 | 15.2527071 | 13.7393386 | 14.6639032 | 14.5950879 | 15.9463835 | 0.090535939 | 3.8805587  | 0.507163708 | PKP2      |
| YGR224W   | 24.3975428 | 24.3467739 | 22.8787225 | 27.6130758 | 26.4535968 | 22.1441682 | 0.090466743 | 4.63034329 | 0.46110389  | AZR1      |
| YJR056C   | 12.4289369 | 12.6626247 | 10.6525269 | 13.9543595 | 13.1616417 | 10.9106835 | 0.090466087 | 3.63501271 | 0.577051893 | YJR056C   |
| YKL074C   | 34.1302553 | 43.1680389 | 42.6706332 | 41.7448213 | 41.9608776 | 44.159216  | 0.090388476 | 5.3730215  | 0.403073401 | MUD2      |
| YNL138W   | 348.930895 | 334.005506 | 353.470209 | 360.743845 | 373.15209  | 369.349232 | 0.090172926 | 8.47866365 | 0.30090634  | SRV2      |
| YOL053W   | 13.7441683 | 15.0224775 | 16.4629961 | 16.0829906 | 14.7254012 | 17.3667092 | 0.090085123 | 3.97232231 | 0.516473033 | AIM39     |
| YIL087C   | 16.9007237 | 16.1160678 | 14.7077502 | 16.9107916 | 16.8755703 | 16.9793477 | 0.089783678 | 4.04725822 | 0.497413834 | AIM19     |
| YDL160C   | 192.418356 | 170.830319 | 196.829644 | 194.474104 | 198.467132 | 203.042009 | 0.089770104 | 7.59086483 | 0.327767375 | DHH1      |
| YGL225W   | 577.320831 | 456.832966 | 601.080933 | 542.97832  | 567.449197 | 629.333388 | 0.089434947 | 9.13595726 | 0.433651152 | VRG4      |
| YGL145W   | 50.4391249 | 63.1980089 | 52.7784285 | 56.822625  | 59.8789542 | 60.4929611 | 0.089221774 | 5.84300945 | 0.371385003 | TIP20     |
| YKL022C   | 71.1540197 | 69.3566491 | 69.4835275 | 78.6410939 | 74.1482589 | 70.4998009 | 0.08910613  | 6.17669821 | 0.291225912 | CDC16     |
| YMR307W   | 4272.4635  | 3397.84267 | 4116.899   | 3970.19267 | 4215.17866 | 4352.00694 | 0.089022793 | 11.9851992 | 0.403718959 | GAS1      |
| YKL078W   | 47.6771389 | 48.9237774 | 52.5968514 | 45.7655689 | 54.5361096 | 58.4915931 | 0.088837939 | 5.68486367 | 0.397221017 | DHR2      |
| YAL065C   | 0.39456943 | 0.92091816 | 0.60525721 | 0.76867235 | 0.39093985 | 0.9038436  | 0.088660934 | -0.3321122 | 0.915308957 | YAL065C   |
| YKL176C   | 185.973722 | 161.333351 | 182.061368 | 178.331984 | 192.081781 | 192.454127 | 0.088639874 | 7.5089332  | 0.338540818 | LST4      |
| YLR371W   | 191.234648 | 166.3984   | 178.006145 | 177.622441 | 198.206506 | 193.680772 | 0.088549708 | 7.52585841 | 0.342527231 | ROM2      |
| YDR483W   | 532.537201 | 490.791823 | 506.539757 | 551.847616 | 541.256227 | 533.461406 | 0.088491593 | 9.03943478 | 0.320002738 | KRE2      |
| YGL241W   | 64.7751473 | 72.8676496 | 70.5729904 | 71.2500136 | 73.8224757 | 76.4393446 | 0.088412117 | 6.1648594  | 0.30208716  | KAP114    |

|           |            |            |            |            |            |            |             |            |             |           |
|-----------|------------|------------|------------|------------|------------|------------|-------------|------------|-------------|-----------|
| YMR160W   | 36.168864  | 37.7000873 | 33.3496722 | 39.2022897 | 37.7908525 | 36.9930274 | 0.088409931 | 5.20920247 | 0.369706189 | YMR160W   |
| YOL039W   | 916.124444 | 676.932407 | 826.29714  | 1101.27096 | 797.452145 | 673.298923 | 0.088368902 | 9.70048585 | 0.577227168 | RPP2A     |
| YEL037C   | 188.998755 | 190.227158 | 187.569209 | 210.675351 | 196.642746 | 195.101097 | 0.08805147  | 7.60730083 | 0.312138774 | RAD23     |
| YCR015C   | 11.5082749 | 12.7777395 | 10.7130526 | 13.8361022 | 11.467569  | 11.8790873 | 0.087969048 | 3.6047326  | 0.569407533 | YCR015C   |
| YBL034C   | 89.7645442 | 88.177914  | 88.004398  | 91.176366  | 99.624506  | 91.8692461 | 0.087843166 | 6.51650902 | 0.286712804 | STU1      |
| YMR162C   | 165.982205 | 142.166741 | 164.266806 | 159.942977 | 171.101343 | 170.955561 | 0.087792733 | 7.34435783 | 0.340589279 | DNF3      |
| YBR070C   | 45.8358149 | 42.8226945 | 46.9679593 | 49.2541588 | 46.6521559 | 48.1619519 | 0.087788634 | 5.54645622 | 0.334983634 | ALG14     |
| YFR020W   | 13.2180757 | 12.7201821 | 15.3735331 | 13.8952309 | 14.2693047 | 15.7527028 | 0.087650868 | 3.84022488 | 0.546104568 | YFR020W   |
| YOR332W   | 226.022519 | 228.330147 | 200.461187 | 263.299843 | 228.830128 | 203.558491 | 0.087552237 | 7.81518563 | 0.416180541 | VMA4      |
| YNL106C   | 58.7250828 | 59.5143362 | 55.8047146 | 59.956443  | 64.5702325 | 60.4284008 | 0.087423837 | 5.90571393 | 0.309457862 | INP52     |
| YHR032W   | 164.009358 | 129.504117 | 160.81684  | 157.104802 | 160.220183 | 165.274259 | 0.087410689 | 7.28777051 | 0.38276939  | ERC1      |
| YKL012W   | 47.6771389 | 55.7731062 | 46.3627021 | 58.3599697 | 51.538904  | 49.2594763 | 0.087223002 | 5.69034154 | 0.406569955 | PRP40     |
| YPL270W   | 159.143001 | 127.66228  | 146.593296 | 141.908741 | 156.180472 | 162.239927 | 0.087194373 | 7.21964994 | 0.379254467 | MDL2      |
| YAR033W   | 15.1909229 | 18.1305763 | 18.0971905 | 17.8568499 | 18.3302696 | 18.0123118 | 0.087169265 | 4.15516641 | 0.500117285 | MST28     |
| YER137W-A | 0.460331   | 0.69068862 | 0.66578293 | 0.76867235 | 0.4560965  | 0.71016283 | 0.087093021 | -0.408637  | 0.908988734 | YER137W-A |
| YLR396C   | 64.05177   | 58.5358607 | 59.2546807 | 61.434659  | 62.1594367 | 69.5313971 | 0.087084336 | 5.96818399 | 0.336100304 | VPS33     |
| YMR109W   | 263.375091 | 283.988138 | 265.465811 | 286.182627 | 293.270047 | 284.000572 | 0.087058428 | 8.12673534 | 0.321256011 | MYO5      |
| YJR024C   | 105.350037 | 98.7684729 | 105.920011 | 108.796701 | 112.395208 | 108.073871 | 0.08697034  | 6.73695557 | 0.285470219 | MDE1      |
| YCR019W   | 20.7806564 | 23.4258558 | 22.3945167 | 28.086105  | 21.1759087 | 21.4340054 | 0.086961037 | 4.52542619 | 0.528643903 | MAK32     |
| YMR185W   | 44.4548219 | 57.6724999 | 48.9653081 | 53.3340351 | 55.5786159 | 51.7127661 | 0.086952326 | 5.70298587 | 0.406768282 | RTP1      |
| YBL104C   | 76.0861375 | 79.198962  | 76.9281911 | 81.42014   | 86.9189608 | 78.3115921 | 0.086711396 | 6.32071711 | 0.297857814 | SEA4      |
| YKL056C   | 1430.57721 | 1142.45654 | 1307.29504 | 1496.13203 | 1355.84457 | 1268.54449 | 0.086706818 | 10.381097  | 0.426291589 | TMA19     |
| YJR002W   | 116.924073 | 104.236424 | 113.001521 | 127.836124 | 114.936317 | 111.882926 | 0.086535717 | 6.84454257 | 0.333203713 | MPP10     |
| YMR173W   | 138.362345 | 170.254745 | 145.322256 | 150.305008 | 163.152232 | 168.695952 | 0.086452961 | 7.28674045 | 0.376287084 | DDR48     |
| YPL152W   | 28.4747602 | 27.4548727 | 25.1786999 | 30.3329934 | 28.0825128 | 27.6317901 | 0.086379249 | 4.80645606 | 0.434871718 | RRD2      |
| YDL148C   | 126.525262 | 128.525641 | 132.853957 | 150.955423 | 132.398297 | 128.345791 | 0.086169076 | 7.05963316 | 0.33605998  | NOP14     |
| YIL090W   | 131.194334 | 110.913081 | 138.846004 | 119.794629 | 132.137671 | 152.426767 | 0.086012793 | 7.03324141 | 0.430282848 | ICE2      |
| YHR023W   | 164.206642 | 156.671202 | 164.993115 | 169.344431 | 176.96544  | 169.341555 | 0.085863767 | 7.3840144  | 0.309264799 | MYO1      |
| YBR283C   | 667.414183 | 521.124565 | 638.970034 | 626.349705 | 637.297118 | 675.687653 | 0.085757168 | 9.29440385 | 0.422097751 | SSH1      |
| YGR013W   | 49.2554166 | 45.7005638 | 47.6337423 | 54.8713798 | 48.997795  | 47.3226686 | 0.085730057 | 5.61732086 | 0.368975849 | SNU71     |
| YAL042W   | 456.516825 | 367.964363 | 405.098649 | 459.015648 | 428.209453 | 417.382063 | 0.085638301 | 8.72271793 | 0.398116065 | ERV46     |
| YHR114W   | 55.7658121 | 53.0103517 | 50.0547711 | 58.8921274 | 55.0573627 | 54.4888571 | 0.085560346 | 5.77258266 | 0.343933876 | BZZ1      |
| YLL021W   | 214.843052 | 188.903338 | 208.390057 | 217.061245 | 222.705403 | 209.627155 | 0.085433718 | 7.71675778 | 0.348032816 | SPA2      |
| YMR281W   | 27.4225751 | 30.9083158 | 31.2312719 | 29.5051924 | 32.7737911 | 32.8611709 | 0.085386096 | 4.94985257 | 0.426105749 | GPI12     |
| YIL129C   | 220.038216 | 210.372243 | 228.968802 | 229.714774 | 245.640541 | 224.217773 | 0.085373568 | 7.82405416 | 0.341228433 | TAO3      |
| YNL141W   | 186.368292 | 208.415292 | 198.524364 | 215.760415 | 212.410654 | 201.298882 | 0.085217492 | 7.67192546 | 0.34182396  | AAH1      |
| YIL113W   | 5.98430295 | 5.00749251 | 5.62889203 | 6.79979383 | 5.73378452 | 5.03570005 | 0.085130407 | 2.54174461 | 0.700040436 | SDP1      |
| YOR304W   | 91.8031529 | 91.2284554 | 98.7779763 | 101.346492 | 99.4941927 | 98.0670308 | 0.085034409 | 6.59856942 | 0.299219401 | ISW2      |
| YJL154C   | 145.727641 | 162.311826 | 146.593296 | 158.523889 | 159.177677 | 164.564096 | 0.084837403 | 7.28796383 | 0.323711513 | VPS35     |
| YOL083W   | 10.2588051 | 12.8352969 | 9.56306389 | 13.4222017 | 10.8811593 | 10.3296412 | 0.084770758 | 3.50575414 | 0.637466009 | ATG34     |
| YEL062W   | 33.6041627 | 36.7791691 | 34.3180837 | 33.4668114 | 37.334756  | 40.3501608 | 0.084739901 | 5.17366062 | 0.419401376 | NPR2      |
| YJL115W   | 50.1760786 | 41.844219  | 49.3284624 | 57.1182682 | 45.2838664 | 47.3226686 | 0.084702151 | 5.60399147 | 0.456879527 | ASF1      |
| YGR194C   | 48.9266087 | 54.3341716 | 50.3573997 | 59.4834139 | 54.5361096 | 48.8721147 | 0.084655476 | 5.72492245 | 0.393669478 | XKS1      |
| YLR383W   | 55.5685274 | 52.8952369 | 53.5652629 | 59.8381857 | 55.5134592 | 56.3611046 | 0.084503561 | 5.80079756 | 0.331896201 | SMC6      |
| YOL079W   | 3.55112483 | 3.91390219 | 5.93152064 | 2.77904617 | 4.69127824 | 6.77882701 | 0.084436376 | 2.23794303 | 0.801127673 | YOL079W   |
| YAL015C   | 31.8943619 | 29.0089221 | 29.9602318 | 31.6338235 | 31.8615981 | 32.7966107 | 0.084410924 | 4.96837411 | 0.408387283 | NTG1      |
| YNL219C   | 191.563456 | 144.756824 | 176.493002 | 166.506256 | 176.248717 | 200.84696  | 0.084321964 | 7.46074216 | 0.457939327 | ALG9      |
| YFL036W   | 164.206642 | 165.937941 | 158.940543 | 171.650448 | 176.835127 | 170.051718 | 0.084320858 | 7.39280867 | 0.314915685 | RPO41     |
| YBR241C   | 55.5027658 | 42.0744485 | 57.9836405 | 53.9253215 | 54.5361096 | 56.3611046 | 0.084250192 | 5.74146606 | 0.465930863 | YBR241C   |
| YLR149C   | 13.941453  | 14.3317889 | 13.7998643 | 14.8412891 | 14.2693047 | 15.4944617 | 0.084033581 | 3.8649016  | 0.529702906 | YLR149C   |
| YDL086W   | 151.383136 | 129.504117 | 149.680108 | 164.200239 | 150.446687 | 141.580644 | 0.084023974 | 7.2086532  | 0.378054342 | YDL086W   |
| YDR170C   | 449.151529 | 430.299011 | 440.566722 | 460.198221 | 485.351828 | 453.535807 | 0.083942458 | 8.82431935 | 0.343089255 | SEC7      |
| YJL210W   | 64.1175316 | 49.7871381 | 64.8835727 | 64.9232489 | 59.8137976 | 64.6248175 | 0.083928542 | 5.94173939 | 0.437330282 | PEX2      |
| YGL127C   | 17.624101  | 19.5119536 | 19.3077049 | 20.0446096 | 19.8076192 | 20.0136798 | 0.083881442 | 4.28639777 | 0.489355231 | SOH1      |
| YJR139C   | 648.803658 | 517.037991 | 680.490679 | 602.698248 | 659.515533 | 694.539248 | 0.083828871 | 9.30821137 | 0.461110321 | HOM6      |
| YPL066W   | 77.5328921 | 90.4802094 | 82.3149803 | 81.3610114 | 90.5677327 | 93.5478128 | 0.083767268 | 6.42779309 | 0.361822377 | RGL1      |
| YBL037W   | 73.9817672 | 74.4792564 | 76.4439854 | 75.152504  | 81.1851763 | 82.056087  | 0.083575917 | 6.27300104 | 0.311806095 | APL3      |
| YIL125W   | 258.179927 | 227.984803 | 249.305444 | 250.35067  | 265.578474 | 263.341289 | 0.083548855 | 7.98050261 | 0.360168215 | KGD1      |
| YNR016C   | 1588.14194 | 1261.08231 | 1557.08469 | 1530.19013 | 1608.84781 | 1529.69074 | 0.083488556 | 10.5628216 | 0.431683428 | ACC1      |
| YOL036W   | 136.718306 | 140.382462 | 132.490803 | 138.715794 | 151.814976 | 143.517452 | 0.083443047 | 7.13672334 | 0.318922765 | YOL036W   |
| YDR306C   | 40.5748892 | 40.2901696 | 38.9785642 | 43.9917097 | 40.071335  | 46.860108  | 0.083436442 | 5.36646159 | 0.375717698 | YDR306C   |
| YDL111C   | 81.9389173 | 78.6809455 | 86.7938836 | 85.9139168 | 87.5053706 | 88.7057935 | 0.083342572 | 6.41007734 | 0.312025041 | RRP42     |
| YBR094W   | 78.5850772 | 86.3360777 | 79.5913228 | 92.1224243 | 89.5252265 | 77.4077485 | 0.08330713  | 6.39339328 | 0.366092566 | PBY1      |
| YPL073C   | 1.97284713 | 2.24473802 | 1.4526173  | 3.31120395 | 1.43344613 | 1.22664489 | 0.083302689 | 1.05734695 | 0.830313766 | YPL073C   |
| YDR120C   | 147.897773 | 149.879431 | 148.166965 | 151.783224 | 164.064425 | 156.623184 | 0.083184759 | 7.25914575 | 0.312496139 | TRM1      |
| YBR228W   | 16.5061543 | 16.7491991 | 14.526173  | 18.2707504 | 16.4194739 | 15.8818233 | 0.082965371 | 4.04619322 | 0.542006982 | SLX1      |
| YOL075C   | 59.3169369 | 51.3411875 | 60.6467722 | 59.128642  | 59.4880144 | 62.7525701 | 0.082894224 | 5.87992649 | 0.375913754 | YOL075C   |
| YOR065W   | 182.882929 | 156.325858 | 170.016725 | 192.46373  | 171.815271 | 171.859405 | 0.082798498 | 7.44992509 | 0.382028397 | CYT1      |
| YBL106C   | 43.8629678 | 45.4703343 | 47.0890108 | 44.1690956 | 51.7995306 | 48.6138737 | 0.082732634 | 5.55303383 | 0.384648705 | SRO77     |
| YDR253C   | 9.99575877 | 11.2236901 | 10.7735783 | 11.5300852 | 11.4024124 | 10.9752437 | 0.08268317  | 3.47412915 | 0.575487505 | MET32     |
| YBR031W   | 4501.83986 | 3563.83817 | 4451.60624 | 4615.87744 | 4380.48106 | 4256.65144 | 0.082413088 | 12.0684951 | 0.446445127 | RPL4A     |
| YLR032W   | 76.0203759 | 78.4507159 | 76.6255625 | 86.5643319 | 84.3778517 | 73.6632535 | 0.082148544 | 6.31130952 | 0.353810286 | RAD5      |
| YLR375W   | 140.335192 | 112.179344 | 140.903878 | 120.385915 | 145.038686 | 151.006442 | 0.082044362 | 7.07751148 | 0.464264439 | STP3      |

|         |            |            |             |            |            |             |             |            |             |         |
|---------|------------|------------|-------------|------------|------------|-------------|-------------|------------|-------------|---------|
| YMR208W | 170.848561 | 143.778348 | 163.7826    | 164.791525 | 161.718786 | 179.800316  | 0.082037877 | 7.35953735 | 0.388014229 | ERG12   |
| YPL060W | 8.94357364 | 11.0510179 | 10.4709497  | 11.6483425 | 10.4250628 | 10.2005206  | 0.082000102 | 3.40528693 | 0.611613587 | MF1M    |
| YML034W | 74.4420982 | 78.7960603 | 76.3229339  | 88.1016766 | 80.6639231 | 74.1797356  | 0.081996308 | 6.3016973  | 0.358633476 | SRC1    |
| YER121W | 0.78913885 | 0.80580339 | 0.66578293  | 0.53215778 | 0.84703635 | 1.03296412  | 0.081856435 | -0.1540354 | 0.841636321 | YER121W |
| YPL001W | 19.9915175 | 33.1530538 | 24.270814   | 29.6825783 | 26.3232835 | 26.0177837  | 0.081817869 | 4.740652   | 0.609468236 | HAT1    |
| YDR066C | 6.3131108  | 9.61208332 | 6.83940645  | 7.56846618 | 8.34005021 | 8.26371293  | 0.081704895 | 2.99249927 | 0.661763627 | RTR2    |
| YBL101C | 92.6580534 | 93.9912099 | 95.9937932  | 93.3049971 | 102.752025 | 103.102731  | 0.081489583 | 6.60113722 | 0.327458427 | ECM21   |
| YLR223C | 185.579153 | 194.256175 | 195.134924  | 210.024936 | 198.727759 | 199.620315  | 0.081460654 | 7.62463626 | 0.348964222 | IFH1    |
| YHR090C | 20.1230407 | 24.4618887 | 21.5471566  | 24.3610005 | 23.9124877 | 21.7568067  | 0.08145201  | 4.51291419 | 0.507645161 | YNG2    |
| YJL099W | 35.6427714 | 36.0309231 | 36.1338553  | 39.4388042 | 37.5953826 | 36.9930274  | 0.08122481  | 5.21328968 | 0.391127222 | CHS6    |
| YBL105C | 149.081481 | 145.159725 | 155.853731  | 159.115176 | 158.721581 | 158.301751  | 0.081198947 | 7.27139125 | 0.322752841 | PKC1    |
| YLR224W | 70.8252118 | 73.6158956 | 72.8124421  | 72.9056156 | 78.5789106 | 78.4407126  | 0.081191961 | 6.22204179 | 0.324513098 | YLR224W |
| YDL027C | 39.4569425 | 50.8807285 | 41.5811702  | 45.8838262 | 48.2810719 | 45.5149814  | 0.081013002 | 5.50473101 | 0.449551197 | YDL027C |
| YPL125W | 114.951226 | 126.165788 | 118.509361  | 122.632804 | 127.902489 | 129.959798  | 0.080932725 | 6.94811057 | 0.32948874  | KAP120  |
| YBR235W | 134.022081 | 112.812475 | 127.769797  | 123.697119 | 128.423742 | 144.033934  | 0.080902506 | 7.00631225 | 0.39859767  | VHC1    |
| YPR164W | 117.384404 | 124.496624 | 126.075076  | 120.090272 | 139.435214 | 129.766117  | 0.08081869  | 6.9809968  | 0.355515244 | MMS1    |
| YOR323C | 188.012331 | 197.076487 | 173.103561  | 218.894233 | 192.668191 | 178.702792  | 0.080765144 | 7.58154717 | 0.421866991 | PRO2    |
| YDR049W | 55.4370042 | 52.3772205 | 57.015229   | 59.7790571 | 57.1423753 | 57.3295084  | 0.08075304  | 5.82361015 | 0.351963795 | VMS1    |
| YMR239C | 26.4361515 | 32.1170209 | 32.3812606  | 30.2738647 | 33.3602008 | 32.6674902  | 0.080717566 | 4.96972672 | 0.473950337 | RNT1    |
| YDL181W | 21.306749  | 16.9794286 | 16.7656247  | 24.3018719 | 17.0058836 | 16.7856669  | 0.080685765 | 4.24688596 | 0.645611232 | INH1    |
| YLR015W | 23.4768808 | 24.4618887 | 24.2102883  | 26.6078889 | 24.6292108 | 25.0493798  | 0.080622318 | 4.63622285 | 0.465146685 | BRE2    |
| YDR312W | 29.3296606 | 36.9518413 | 32.2602092  | 34.6493842 | 35.0542735 | 34.6042979  | 0.08042874  | 5.08511972 | 0.464521174 | SSF2    |
| YMR077C | 6.83920337 | 9.03650947 | 7.68676654  | 8.8692963  | 7.75364043 | 8.32827319  | 0.080413724 | 3.03984617 | 0.649308072 | VPS20   |
| YCR036W | 65.9588556 | 72.8100922 | 63.6125326  | 76.5124628 | 69.8479205 | 67.5945894  | 0.080263397 | 6.11946217 | 0.381905443 | RBK1    |
| YGR210C | 158.748432 | 145.332397 | 152.827445  | 172.892149 | 161.002063 | 149.005074  | 0.080216553 | 7.29238598 | 0.373314475 | YGR210C |
| YKL045W | 51.7543563 | 44.3767439 | 49.9337197  | 52.1514623 | 50.8873376 | 51.2608443  | 0.080179215 | 5.64884288 | 0.394434337 | PR12    |
| YOR087W | 115.54308  | 99.7469485 | 111.125223  | 121.568488 | 113.698341 | 109.623317  | 0.080102538 | 6.80736615 | 0.370671496 | YVC1    |
| YKL197C | 53.1353493 | 50.0173677 | 52.1126456  | 51.7966904 | 55.7740858 | 56.5547854  | 0.079970773 | 5.73723198 | 0.366356637 | PEX1    |
| YGR022C | 1.05218513 | 0.57557385 | 1.93682307  | 1.47821605 | 1.49860277 | 0.77472309  | 0.079828272 | 0.4248937  | 0.853316392 | YGR022C |
| YIL172C | 5.91854138 | 6.67665668 | 7.14203505  | 7.62759482 | 7.29754393 | 5.93954367  | 0.079812896 | 2.78654949 | 0.657427097 | IMA3    |
| YJL221C | 5.91854138 | 6.67665668 | 7.14203505  | 7.62759482 | 7.29754393 | 5.93954367  | 0.079812892 | 2.78654949 | 0.657427097 | IMA4    |
| YDR473C | 16.7522777 | 16.5765269 | 16.6445732  | 17.6203353 | 17.3968235 | 16.7856669  | 0.079796331 | 4.08130893 | 0.53063469  | PRP3    |
| YLR064W | 93.9075232 | 83.0553068 | 96.8411533  | 95.4927568 | 91.4147691 | 102.392568  | 0.079773858 | 6.55402812 | 0.379955172 | PER33   |
| YGL125W | 53.2011108 | 42.8226945 | 49.2679367  | 50.6141176 | 51.9950005 | 50.8089225  | 0.079624892 | 5.64067506 | 0.427180918 | MET13   |
| YPL213W | 11.639798  | 13.2381986 | 11.1972583  | 14.36826   | 12.0539788 | 11.6854066  | 0.07959391  | 3.64404916 | 0.615146898 | LEA1    |
| YDR332W | 29.5927069 | 29.7571681 | 29.4155003  | 31.3973089 | 31.9919114 | 30.4078812  | 0.079508966 | 4.93305688 | 0.428842342 | IRC3    |
| YOR380W | 26.4361515 | 27.9728892 | 28.9312945  | 29.0912919 | 28.603766  | 30.4078812  | 0.079483307 | 4.84293975 | 0.449750727 | RDR1    |
| YJR160C | 30.5133689 | 27.5699875 | 29.2944489  | 26.6670175 | 30.8842484 | 34.7979787  | 0.079339987 | 4.90962563 | 0.50778677  | MPH3    |
| YDR532C | 9.33814306 | 11.0510179 | 11.0156812  | 11.5300852 | 12.7055452 | 8.97387576  | 0.079299316 | 3.44646715 | 0.65332794  | KRE28   |
| YIL085C | 130.142149 | 130.54015  | 119.65935   | 138.715794 | 132.007357 | 131.057322  | 0.079290605 | 7.02766276 | 0.342918592 | KTR7    |
| YHR065C | 97.6559327 | 95.7754889 | 97.7490391  | 108.087158 | 103.599061 | 95.871982   | 0.079282566 | 6.64263533 | 0.344385504 | RRP3    |
| YGR145W | 100.286396 | 104.639326 | 108.462092  | 113.172221 | 110.049569 | 107.88019   | 0.079244184 | 6.7487704  | 0.33139234  | ENP2    |
| YKR102W | 30.9079383 | 24.807233  | 29.5970775  | 25.6618306 | 31.7312848 | 32.7320504  | 0.079219707 | 4.8744791  | 0.5400347   | FL010   |
| YIL059C | 4.07721739 | 3.22321357 | 3.99469757  | 4.61203408 | 3.90939854 | 3.35713338  | 0.079117594 | 1.99486328 | 0.747390575 | YIL059C |
| YER176W | 101.996196 | 103.660851 | 113.304149  | 109.210602 | 113.502871 | 114.271655  | 0.079040552 | 6.77406236 | 0.344178242 | ECM32   |
| YJL039C | 291.652567 | 254.518757 | 300.207575  | 287.306072 | 303.1087   | 303.56233   | 0.079004005 | 8.18073797 | 0.405496835 | NUP192  |
| YIL136W | 44.4548219 | 36.5489396 | 41.1574901  | 47.6576855 | 42.1563475 | 39.0589556  | 0.078988628 | 5.39087414 | 0.482179832 | OM45    |
| YHR124W | 19.9915175 | 17.9003468 | 17.7340362  | 15.6690901 | 20.9804388 | 22.1441682  | 0.078949194 | 4.26055274 | 0.600824871 | NDT80   |
| YDR456W | 221.945302 | 171.808795 | 193.440204  | 211.739667 | 195.078987 | 213.177969  | 0.078804052 | 7.6532178  | 0.450899578 | NHX1    |
| YPL165C | 16.1115849 | 19.0514945 | 16.8261504  | 18.4481363 | 18.5044864 | 18.0123118  | 0.078776445 | 4.16651333 | 0.537332219 | SET6    |
| YPL159C | 38.5362805 | 44.3767439 | 33.5312493  | 45.8246976 | 39.6152385 | 37.5095095  | 0.078605234 | 5.32338586 | 0.518265597 | PET20   |
| YKL072W | 41.5613128 | 39.5419236 | 40.31013    | 44.4647388 | 42.4821308 | 41.1894441  | 0.078563749 | 5.38244619 | 0.400014294 | STB6    |
| YNL207W | 61.3555456 | 70.2200099 | 70.6335162  | 74.3838316 | 71.6071498 | 67.5945894  | 0.078523071 | 6.11761169 | 0.38740542  | RIO2    |
| YOL158C | 144.675456 | 160.930449 | 213.474217  | 168.220987 | 170.905873 | 209.046113  | 0.078452753 | 7.47574318 | 0.55993656  | ENB1    |
| YBR172C | 217.473515 | 181.938894 | 223.642538  | 197.962693 | 218.796005 | 241.068001  | 0.078377504 | 7.73862018 | 0.466054353 | SMY2    |
| YLR248W | 247.460791 | 237.078869 | 234.174014  | 265.724117 | 248.246807 | 244.747935  | 0.078314711 | 7.94463472 | 0.377335607 | RCK2    |
| YDR320C | 61.4213072 | 65.903206  | 65.0651499  | 68.1753242 | 71.21621   | 63.7855342  | 0.078285887 | 6.04559062 | 0.366770285 | SWA2    |
| YFR043C | 10.9821823 | 15.0224775 | 13.3761843  | 13.8361022 | 13.9435214 | 13.8804553  | 0.078274619 | 3.77031523 | 0.600345856 | IRC6    |
| YBR213W | 8.87781207 | 5.64062374 | 8.11044659  | 9.40145408 | 8.07942364 | 6.32690521  | 0.07823947  | 2.9736888  | 0.732751702 | MET8    |
| YLO83C  | 28.2774755 | 32.2896931 | 29.1128717  | 31.4564375 | 30.3629953 | 32.9257312  | 0.078198835 | 4.94802435 | 0.459205212 | SEN54   |
| YGL099W | 100.089111 | 105.2149   | 110.701543  | 106.549813 | 108.616123 | 118.532632  | 0.078193218 | 6.76029787 | 0.361913676 | LGS1    |
| YDR365C | 222.011063 | 186.025469 | 206.271656  | 232.612078 | 202.376531 | 213.30709   | 0.078071388 | 7.71802203 | 0.429319793 | ESF1    |
| YMR028W | 11.9028443 | 15.0224775 | 14.4656473  | 14.1908741 | 15.3769676 | 14.2032566  | 0.077970596 | 3.84057077 | 0.600278542 | TAP42   |
| YIL149C | 164.075119 | 157.937465 | 158.335286  | 174.784266 | 168.299607 | 163.853933  | 0.077930722 | 7.36342812 | 0.356447154 | MLP2    |
| YMR096W | 21.5040337 | 18.3032485 | 18.5813963  | 21.641083  | 20.8501255 | 19.0452759  | 0.077850569 | 4.32935657 | 0.552461408 | SNZ1    |
| YMR198W | 26.2388668 | 27.1095284 | 28.0839344  | 30.2738647 | 29.0598624 | 26.598826   | 0.077838882 | 4.80857022 | 0.47594949  | CIK1    |
| YMR049C | 249.565161 | 241.971247 | 252.089627  | 276.130758 | 259.518906 | 249.0373473 | 0.077738738 | 7.9935061  | 0.384661765 | ERB1    |
| YFR019W | 124.683938 | 123.518149 | 123.9566676 | 129.293592 | 138.262395 | 129.249635  | 0.077722521 | 6.99558655 | 0.346868643 | FAB1    |
| YGR170W | 108.703877 | 106.999179 | 107.07      | 115.419109 | 111.808798 | 113.367812  | 0.07769744  | 6.79029429 | 0.328981407 | PSD2    |
| YLR341W | 15.322446  | 12.0294935 | 13.9814415  | 13.4222017 | 15.4421242 | 14.7197387  | 0.077635195 | 3.83349471 | 0.614967364 | SPO77   |
| YER039C | 9.4696662  | 7.88536176 | 8.59465235  | 8.92842494 | 9.05677327 | 9.3612373   | 0.07759305  | 3.16921892 | 0.638009205 | HVG1    |
| YOR099W | 462.895697 | 371.648036 | 454.971843  | 443.169172 | 447.560976 | 469.869552  | 0.07751439  | 8.78721093 | 0.451039079 | KTR1    |
| YPL185W | 1.70980084 | 0.69068862 | 1.63419446  | 0.94605827 | 0.91219299 | 2.38872952  | 0.077414544 | 0.57496918 | 0.916455728 | YPL185W |

|         |            |            |            |            |             |            |             |            |             |         |
|---------|------------|------------|------------|------------|-------------|------------|-------------|------------|-------------|---------|
| YOR112W | 79.3084545 | 72.176961  | 78.0176541 | 77.2811351 | 79.6214168  | 85.2195396 | 0.07739046  | 6.29855531 | 0.366101736 | CEX1    |
| YOR069W | 49.649986  | 49.614466  | 49.3889882 | 55.5217948 | 52.1253138  | 49.1303558 | 0.07731218  | 5.67335491 | 0.39311504  | VPS5    |
| YML069W | 122.316522 | 118.510656 | 118.993567 | 135.877619 | 123.146054  | 120.46944  | 0.077208486 | 6.94656759 | 0.363977656 | POB3    |
| YDR256C | 35.8400561 | 32.57748   | 35.1654438 | 34.353741  | 37.3999127  | 37.5095095 | 0.077111699 | 5.15315686 | 0.440606418 | CTA1    |
| YJL047C | 27.882906  | 30.9658732 | 25.1181741 | 28.3817482 | 30.4933086  | 29.7622786 | 0.077017992 | 4.85252647 | 0.497557319 | RTT101  |
| YDR258C | 112.715332 | 112.812475 | 106.525269 | 140.312267 | 112.460365  | 97.356868  | 0.07697157  | 6.83086763 | 0.50654797  | HSP78   |
| YNL325C | 29.8557532 | 35.3977919 | 29.8997061 | 35.3589279 | 32.1873813  | 32.8611709 | 0.076934407 | 5.03261321 | 0.485578121 | FIG4    |
| YJR121W | 1496.33878 | 1182.05602 | 1397.29679 | 1465.56252 | 1374.74     | 1458.35165 | 0.07688679  | 10.446907  | 0.464610812 | ATP2    |
| YLR345W | 40.2460814 | 45.4703343 | 38.6759356 | 45.4107971 | 44.1762035  | 41.6413659 | 0.07675457  | 5.41739072 | 0.438399925 | YLR345W |
| YBR053C | 79.1111698 | 85.0698152 | 80.9228887 | 101.228235 | 82.2276825  | 74.9544587 | 0.076729288 | 6.3934362  | 0.47360179  | YBR053C |
| YDR251W | 177.622003 | 159.894416 | 179.882442 | 172.00522  | 185.305491  | 188.32227  | 0.076688995 | 7.46988142 | 0.400322462 | PAM1    |
| YKL160W | 29.72423   | 37.9303168 | 28.9312945 | 39.3205469 | 34.01117673 | 28.5356337 | 0.076677632 | 5.05431665 | 0.585247018 | ELF1    |
| YGR184C | 254.234233 | 228.905721 | 257.718519 | 244.496935 | 266.686137  | 270.055556 | 0.076576143 | 7.9874873  | 0.412482142 | UBR1    |
| YGR253C | 113.241425 | 130.022133 | 114.575189 | 134.754175 | 126.469043  | 116.143903 | 0.076545082 | 6.93868163 | 0.408431293 | PUP2    |
| YMR161W | 52.0831641 | 51.2260728 | 50.4179254 | 48.6037437 | 55.1225194  | 58.4270328 | 0.076324965 | 5.72126569 | 0.422648023 | HLJ1    |
| YDR274C | 4.07721739 | 4.89237774 | 3.69206897 | 4.61203408 | 4.03971182  | 4.71289878 | 0.076186526 | 2.15942006 | 0.732666877 | YDR274C |
| YML117W | 239.963972 | 227.524343 | 229.513533 | 244.615192 | 252.156206  | 237.969108 | 0.07614931  | 7.89929479 | 0.383263891 | NAB6    |
| YLR226W | 33.9987321 | 41.1535304 | 33.591775  | 38.0788455 | 37.4650693  | 39.1880762 | 0.076126393 | 5.22418403 | 0.477115851 | BUR2    |
| YGL211W | 55.7000505 | 53.8161551 | 55.3810345 | 57.0000109 | 60.0744242  | 56.7484661 | 0.076085506 | 5.82197335 | 0.372311381 | NCS6    |
| YLR198C | 72.4034895 | 80.6378966 | 69.362476  | 114.05915  | 65.6778954  | 54.6179776 | 0.076001924 | 6.25372228 | 0.698434477 | YLR198C |
| YGR229C | 210.437027 | 216.415768 | 217.953121 | 231.902534 | 227.787621  | 219.956796 | 0.075913422 | 7.78704389 | 0.379494985 | SMI1    |
| YLR426W | 42.5477364 | 43.3982684 | 44.3653533 | 44.4056101 | 44.8929265  | 48.0973917 | 0.075894333 | 5.48344084 | 0.404419804 | TDA5    |
| YJL014W | 294.348791 | 318.119668 | 285.439299 | 330.824752 | 306.627158  | 308.856271 | 0.075739372 | 8.26445142 | 0.405674078 | CCT3    |
| YGR103W | 296.716208 | 316.795848 | 304.868056 | 354.357952 | 318.420511  | 295.040376 | 0.075703296 | 8.29693631 | 0.430604712 | NOP7    |
| YDL017W | 19.0708556 | 21.066003  | 22.2734653 | 24.0062287 | 19.7424626  | 22.0150477 | 0.075654822 | 4.42628645 | 0.554371083 | CDC7    |
| YKR003W | 71.2855428 | 91.4011276 | 70.3308876 | 91.5902665 | 80.0123567  | 73.9860548 | 0.075582919 | 6.32048386 | 0.510096979 | OSH6    |
| YBR193C | 20.2545638 | 25.9583807 | 18.3998191 | 24.6566437 | 22.7396681  | 20.7238426 | 0.075520315 | 4.47673867 | 0.604044202 | MED8    |
| YHL038C | 38.0759495 | 39.3692514 | 40.0075014 | 36.9554013 | 42.807914   | 44.0946557 | 0.07537947  | 5.33385341 | 0.456059137 | CBP2    |
| YDL213C | 44.1260141 | 43.2831536 | 48.5416281 | 53.2749065 | 43.2640105  | 46.6125057 | 0.075356573 | 5.54384672 | 0.470718792 | NOP6    |
| YLL050C | 406.866839 | 413.952714 | 380.888361 | 492.186816 | 411.920292  | 361.924802 | 0.075338858 | 8.6845064  | 0.503320208 | COF1    |
| YJL140W | 43.4683983 | 49.8446955 | 47.3311137 | 49.4315447 | 50.2357712  | 48.6138737 | 0.075299016 | 5.59352076 | 0.411365953 | RPB4    |
| YLR423C | 9.73271249 | 10.2452146 | 9.80516677 | 9.81535457 | 11.2069425  | 10.3942014 | 0.075273957 | 3.3673551  | 0.62476308  | ATG17   |
| YAL026C | 273.436612 | 233.164967 | 257.415891 | 274.29777  | 266.23004   | 264.245133 | 0.075202211 | 8.03108743 | 0.421257954 | DRS2    |
| YLR390W | 9.40390463 | 11.2812475 | 10.2288468 | 11.884857  | 11.4024124  | 9.29667705 | 0.075192334 | 3.42223074 | 0.665625081 | ECM19   |
| YBR131W | 30.184561  | 30.2751846 | 29.4155003 | 29.6234496 | 30.9494051  | 34.1523761 | 0.075180408 | 4.94872757 | 0.474281298 | CCZ1    |
| YLR017W | 155.263069 | 150.742792 | 154.643217 | 151.842353 | 157.809388  | 175.66846  | 0.075158199 | 7.30171559 | 0.394856579 | MEU1    |
| YKL172W | 91.5401066 | 103.488178 | 101.622685 | 114.295665 | 97.7349634  | 100.45576  | 0.075032157 | 6.6676881  | 0.415515191 | EBP2    |
| YPL128C | 105.021229 | 90.4802094 | 101.380582 | 99.2178613 | 106.92205   | 106.524424 | 0.074991873 | 6.66811702 | 0.395259744 | TBF1    |
| YLR196W | 198.994513 | 189.594027 | 191.261278 | 208.487592 | 198.727759  | 203.493931 | 0.07496579  | 7.6333337  | 0.386115041 | PWP1    |
| YOR192C | 14.4675456 | 12.3172804 | 15.1919559 | 12.8309153 | 15.9633774  | 15.4299015 | 0.074810287 | 3.85511586 | 0.620136396 | THI72   |
| YMR261C | 256.009795 | 214.458817 | 241.01342  | 252.893202 | 258.346087  | 237.969108 | 0.074766291 | 7.92811357 | 0.436436172 | TPS3    |
| YML115C | 172.426839 | 166.62863  | 174.193024 | 179.751072 | 177.16091   | 183.609372 | 0.074754236 | 7.4573575  | 0.377225052 | VAN1    |
| YJL211C | 15.0593997 | 11.8568213 | 12.8314528 | 12.4761435 | 12.3146054  | 17.0439079 | 0.074717903 | 3.77599303 | 0.670790532 | YJL211C |
| YGL017W | 45.3097223 | 39.1390219 | 44.9706106 | 47.9533287 | 46.0005894  | 42.224083  | 0.074691993 | 5.47195448 | 0.462005699 | ATE1    |
| YER048C | 82.9911024 | 88.0627993 | 85.6438949 | 99.6317618 | 85.8112979  | 84.832178  | 0.074674376 | 6.45888742 | 0.408060199 | CAJ1    |
| YLR330W | 238.056887 | 226.258081 | 215.895246 | 253.129716 | 241.665986  | 221.441682 | 0.074650021 | 7.86334292 | 0.422554723 | CHS5    |
| YDR520C | 28.0144292 | 32.2321357 | 26.6918429 | 31.2790516 | 30.6236219  | 29.6977183 | 0.074608286 | 4.90152959 | 0.500263951 | URC2    |
| YLR045C | 86.4764657 | 75.8606336 | 82.1334031 | 89.9346645 | 87.7659971  | 79.6027972 | 0.074597055 | 6.3879391  | 0.405494064 | STU2    |
| YPR050C | 8.02291165 | 10.014985  | 9.26043528 | 10.1701264 | 7.29754393  | 11.298045  | 0.074547447 | 3.24520113 | 0.700211476 | YPR050C |
| YIL140W | 173.150216 | 144.641709 | 166.324681 | 161.362064 | 168.364764  | 179.993997 | 0.074547087 | 7.37279311 | 0.43593795  | AXL2    |
| YJL121C | 202.808685 | 152.98753  | 196.829644 | 181.99796  | 192.146938  | 207.690348 | 0.074511674 | 7.56354598 | 0.508007817 | RPE1    |
| YNL064C | 519.910979 | 572.177966 | 555.989271 | 631.139125 | 553.570833  | 550.634434 | 0.074448256 | 9.1396643  | 0.43824267  | YDJ1    |
| YMR097C | 15.0593997 | 18.533478  | 15.3130074 | 20.2811242 | 16.7452571  | 14.4614976 | 0.074445412 | 4.07727344 | 0.651608575 | MTG1    |
| YDR310C | 144.806979 | 137.56215  | 145.019627 | 153.852727 | 150.837627  | 145.260579 | 0.074435715 | 7.19321678 | 0.36726826  | SUM1    |
| YOL21C  | 217.539276 | 207.667046 | 228.42407  | 220.372449 | 238.733937  | 229.059793 | 0.074242993 | 7.80572062 | 0.407048191 | DIS3    |
| YGR006W | 11.0479439 | 9.38185378 | 9.50253816 | 10.5248983 | 9.7083397   | 11.2334848 | 0.074236468 | 3.37124789 | 0.653465992 | PRP18   |
| YLR215C | 23.6084039 | 29.8147255 | 23.6655568 | 28.6182627 | 26.1929702  | 26.4051452 | 0.074234026 | 4.72932229 | 0.550748645 | CDC123  |
| YAL012W | 800.647125 | 614.540201 | 749.853155 | 714.392253 | 796.865735  | 767.8797   | 0.074145294 | 9.53291922 | 0.500078892 | CYS3    |
| YBR275C | 133.890558 | 132.900002 | 141.690712 | 137.887993 | 145.168999  | 147.003706 | 0.074109067 | 7.12798597 | 0.371773537 | RIF1    |
| YCL047C | 22.0301262 | 28.0304466 | 23.4839797 | 27.908719  | 25.6717171  | 23.8872952 | 0.074045545 | 4.66179549 | 0.559825389 | POF1    |
| YLR103C | 31.6970772 | 30.7356437 | 27.539203  | 37.3101731 | 28.9947058  | 28.2773927 | 0.073792432 | 4.94930895 | 0.56691481  | CDC45   |
| YMR315W | 168.875714 | 163.865875 | 151.677456 | 184.481363 | 167.713197  | 157.527028 | 0.073760251 | 7.37345112 | 0.429040712 | YMR315W |
| YJL142C | 5.52397195 | 6.9644436  | 6.53677785 | 5.38070642 | 6.51566423  | 8.19915267 | 0.073742588 | 2.73147368 | 0.715725132 | IRC9    |
| YLL005C | 48.7950856 | 44.4918587 | 47.8153194 | 53.511421  | 43.9155769  | 50.938043  | 0.073603963 | 5.59602104 | 0.468109887 | SPO75   |
| YMR068W | 13.3495989 | 13.6411003 | 15.0709045 | 15.0186751 | 14.4647746  | 14.7842989 | 0.073558162 | 3.85937804 | 0.587601511 | AVO2    |
| YAL036C | 155.065784 | 149.879431 | 149.559056 | 167.156671 | 151.814976  | 159.205594 | 0.073517748 | 7.28143145 | 0.384419193 | RBG1    |
| YGR186W | 160.32671  | 143.720791 | 157.245823 | 171.295676 | 161.718786  | 152.233087 | 0.07342878  | 7.30265308 | 0.41203051  | TFG1    |
| YGL212W | 18.939324  | 15.5980514 | 16.7656247 | 16.7656247 | 17.7877633  | 17.2375887 | 0.073334382 | 4.14129141 | 0.585687398 | VAM7    |
| YHR186C | 131.917711 | 138.598183 | 134.79078  | 134.399403 | 149.078397  | 143.06553  | 0.073314784 | 7.11645    | 0.381839947 | KOG1    |
| YHR194W | 51.6228331 | 44.837203  | 51.2047598 | 54.6939939 | 51.1479642  | 49.3885968 | 0.07330752  | 5.66108811 | 0.448787923 | MDM31   |
| YMR200W | 74.3763367 | 73.0978791 | 74.0834823 | 69.8309262 | 72.7148128  | 90.5780409 | 0.073037426 | 6.24584505 | 0.474244091 | ROT1    |
| YGR078C | 56.2261431 | 53.2981386 | 52.5363256 | 68.2935815 | 52.5814103  | 49.4531571 | 0.073017082 | 5.7953731  | 0.534334702 | PAC10   |
| YBL046W | 29.9215147 | 31.080988  | 31.8365291 | 40.2666052 | 32.7737911  | 24.5328978 | 0.072758811 | 4.9946937  | 0.631364489 | PSY4    |

|           |            |            |            |            |            |            |             |             |             |           |
|-----------|------------|------------|------------|------------|------------|------------|-------------|-------------|-------------|-----------|
| YMR123W   | 49.5842244 | 43.5709406 | 44.5469305 | 56.3495958 | 45.2838664 | 42.9971313 | 0.072499333 | 5.56024713  | 0.52921436  | PKR1      |
| YPR141C   | 29.4611837 | 34.3617589 | 31.5944263 | 34.2354837 | 34.2072372 | 31.9573273 | 0.072435855 | 5.03431521  | 0.491163254 | KAR3      |
| YOR127W   | 113.504471 | 115.690344 | 115.543601 | 126.003136 | 126.012946 | 110.39804  | 0.072223196 | 6.88247183  | 0.401731378 | RGA1      |
| YNR068C   | 6.57615709 | 7.94291915 | 7.5657151  | 8.63278173 | 7.49301386 | 7.1016283  | 0.072203197 | 2.94286186  | 0.676407059 | YNR068C   |
| YOL101C   | 25.9100589 | 23.4834131 | 29.5970775 | 23.2375563 | 28.0825128 | 31.7636466 | 0.072041818 | 4.76104672  | 0.601159369 | IZH4      |
| YNL224C   | 46.6907153 | 42.9378093 | 50.5389769 | 50.4367316 | 50.2357712 | 46.6125057 | 0.072026022 | 5.58582329  | 0.456370184 | SQS1      |
| YDR490C   | 60.8294531 | 61.125943  | 63.4309554 | 68.4709674 | 63.2670996 | 63.0753713 | 0.071925027 | 5.98857233  | 0.400325901 | PKH1      |
| YNL328C   | 4.14297896 | 4.54703343 | 3.99469757 | 3.90249037 | 4.88674817 | 4.58377827 | 0.071853515 | 2.15792195  | 0.753413393 | MDJ2      |
| YNR010W   | 3.94569425 | 7.42490268 | 4.59995478 | 5.49896371 | 6.18988101 | 5.16482058 | 0.071829993 | 2.48885713  | 0.770150522 | CSE2      |
| YBR063C   | 26.8964825 | 33.5559555 | 29.052346  | 33.4076827 | 32.2525379 | 28.4710735 | 0.07178294  | 4.94242364  | 0.543791356 | YBR063C   |
| YPR089W   | 123.763276 | 130.194805 | 123.230368 | 131.029071 | 131.290634 | 134.156215 | 0.071757749 | 7.01198999  | 0.375022747 | YPR089W   |
| YGR101W   | 47.0852847 | 38.9087924 | 43.578519  | 43.3412946 | 45.0883964 | 47.6454699 | 0.071453241 | 5.47178982  | 0.482995063 | PCP1      |
| YOR062C   | 7.69410379 | 10.3603293 | 8.65517807 | 9.63796865 | 8.92645999 | 9.55491807 | 0.071434669 | 3.21349231  | 0.682023681 | YOR062C   |
| YPR199W   | 177.819288 | 146.886447 | 173.164087 | 167.807086 | 173.642452 | 181.608004 | 0.071425957 | 7.411157593 | 0.458894433 | PMT6      |
| YBL039C   | 329.399708 | 361.345264 | 352.320221 | 352.347578 | 362.596714 | 381.163759 | 0.071423672 | 8.47838141  | 0.427651951 | URA7      |
| YHL007C   | 182.685644 | 179.521484 | 185.632386 | 187.319538 | 198.727759 | 189.613476 | 0.071417462 | 7.54972482  | 0.406374147 | STE20     |
| YHR063W-A | 105.284275 | 117.417066 | 123.04879  | 133.453345 | 111.352702 | 118.468072 | 0.071367788 | 6.88647869  | 0.45695704  | YHR063W-A |
| YPL153C   | 38.8650884 | 32.6925948 | 37.6469983 | 40.0300906 | 37.2695994 | 37.3158287 | 0.071342483 | 5.22569224  | 0.498229612 | RAD53     |
| YNL074C   | 111.663147 | 95.0272429 | 108.522617 | 91.176366  | 112.330051 | 127.700189 | 0.071255774 | 6.75257449  | 0.538329323 | MLF3      |
| YKL049C   | 9.53542778 | 10.4178867 | 9.19990956 | 10.4657696 | 10.8160206 | 9.3312373  | 0.071211005 | 3.3353282   | 0.653293261 | CSE4      |
| YOL038W   | 152.632606 | 140.152233 | 138.846004 | 171.473062 | 149.925434 | 131.896606 | 0.071140946 | 7.2057099   | 0.487187877 | PRE6      |
| YOR118W   | 70.8909734 | 75.918191  | 64.6414698 | 77.1037492 | 72.845126  | 72.1783676 | 0.071085671 | 6.17777439  | 0.427026216 | RTC5      |
| YBL020W   | 139.480292 | 117.704853 | 139.995992 | 121.03633  | 140.282251 | 155.913021 | 0.071017415 | 7.08566324  | 0.508100254 | RFT1      |
| YJL016W   | 71.7458738 | 65.8456486 | 69.5440532 | 76.3350768 | 69.0008842 | 72.1138074 | 0.07095055  | 6.14742085  | 0.412786225 | YJL016W   |
| YML088W   | 59.3826985 | 63.8886975 | 62.8862239 | 68.4709674 | 65.4172688 | 61.6550457 | 0.070882698 | 5.99433874  | 0.41486218  | UFO1      |
| YPL235W   | 152.895652 | 155.40494  | 154.764268 | 167.747957 | 153.899989 | 164.628656 | 0.070646004 | 7.30698095  | 0.40006401  | RVB2      |
| YHR143W-A | 1.44675456 | 2.24473802 | 1.39209158 | 1.24170148 | 2.28048248 | 1.87224746 | 0.070628035 | 0.90230797  | 0.82366298  | RPC10     |
| YDR097C   | 102.061958 | 99.6318337 | 101.138479 | 113.113092 | 107.8994   | 96.9049462 | 0.070516433 | 6.69467211  | 0.416406962 | MSH6      |
| YKR030W   | 55.5685274 | 50.6504989 | 59.617835  | 53.0975205 | 58.7061347 | 62.3652085 | 0.070492821 | 5.82719043  | 0.472946191 | GMH1      |
| YPR011C   | 31.8943619 | 32.7501521 | 30.2628604 | 31.2790516 | 35.3800567 | 33.0548517 | 0.070440292 | 5.02474107  | 0.495729936 | YPR011C   |
| YOL055C   | 26.3046283 | 29.6996107 | 27.539203  | 31.9294667 | 28.408267  | 27.3735491 | 0.07024057  | 4.84202111  | 0.535235987 | THI20     |
| YFL009W   | 132.772612 | 117.99264  | 125.530345 | 133.180177 | 144.292175 | 147.322175 | 0.070224427 | 7.00744852  | 0.462497995 | CDC4      |
| YER179W   | 5.39244881 | 4.89237774 | 5.32626343 | 5.85373556 | 4.69127824 | 5.81042315 | 0.070180544 | 2.44671083  | 0.74109622  | DMC1      |
| YCR017C   | 520.502833 | 404.340631 | 472.040096 | 491.418144 | 481.312116 | 493.563167 | 0.07010113  | 8.89874592  | 0.49843571  | CWH43     |
| YOR023C   | 93.2499075 | 95.7179315 | 101.864788 | 87.5695188 | 105.879544 | 111.947486 | 0.069854411 | 6.63634031  | 0.481792746 | AHC1      |
| YDR263C   | 19.925756  | 18.9363797 | 19.5498078 | 20.9906679 | 19.7424626 | 20.5301618 | 0.069844859 | 4.32679452  | 0.56457744  | DIN7      |
| YOR053W   | 7.16801122 | 4.48947604 | 5.38678915 | 9.57884001 | 5.47315795 | 2.77609106 | 0.069614644 | 2.57247268  | 0.86309878  | YOR053W   |
| YKL165C   | 218.591462 | 181.82378  | 217.832069 | 203.402529 | 211.889401 | 233.38533  | 0.069431028 | 7.72284685  | 0.495108379 | MCD4      |
| YOR037W   | 15.5197307 | 17.6701172 | 15.9787903 | 15.5508328 | 18.3741731 | 17.7540707 | 0.069410786 | 4.081415    | 0.604946343 | CYC2      |
| YHR039C   | 357.808707 | 293.657779 | 356.496495 | 329.583051 | 360.446545 | 367.541545 | 0.069379422 | 8.42775226  | 0.499069637 | MSC7      |
| YMR133W   | 21.5697952 | 19.6270683 | 20.8813737 | 22.5280126 | 21.1107521 | 21.4340054 | 0.069368992 | 4.41358066  | 0.56037217  | REC114    |
| YHR082C   | 240.29278  | 231.78359  | 231.631933 | 242.250046 | 250.853073 | 245.199857 | 0.069260275 | 7.90960108  | 0.422165524 | KSP1      |
| YDR001C   | 165.587635 | 166.168171 | 156.337937 | 180.815387 | 163.347702 | 167.856669 | 0.069233906 | 7.38209346  | 0.428274674 | NTH1      |
| YML019W   | 100.154872 | 91.6889145 | 104.406868 | 93.6006403 | 102.817181 | 114.400776 | 0.069091945 | 6.66225952  | 0.469009145 | OST6      |
| YDR442W   | 4.01145582 | 2.41741018 | 3.38944036 | 4.0798763  | 4.10486846 | 2.06592823 | 0.069050865 | 1.79158853  | 0.852522021 | YDR442W   |
| YDR028C   | 176.175248 | 175.550025 | 176.916682 | 179.573686 | 194.753204 | 180.252238 | 0.069013655 | 7.497087    | 0.424858652 | REG1      |
| YOR097C   | 15.3882076 | 15.4253792 | 17.1893047 | 16.2603766 | 16.8755703 | 17.2375887 | 0.068867679 | 4.04587186  | 0.600860356 | YOR097C   |
| YDR156W   | 60.6321683 | 47.4272854 | 54.836303  | 50.0228311 | 55.8392424 | 64.9476188 | 0.068762094 | 5.79984258  | 0.558117609 | RPA14     |
| YLR316C   | 33.4726396 | 32.57748   | 30.8075919 | 36.7780153 | 31.144875  | 33.5713338 | 0.06866723  | 5.0525411   | 0.525313708 | TAD3      |
| YAR019C   | 60.6979299 | 55.3126471 | 58.1652177 | 54.2800934 | 64.3096059 | 64.1083355 | 0.068626784 | 5.89680057  | 0.473327334 | CDC15     |
| YBR102C   | 60.3691221 | 55.9457784 | 53.8678915 | 60.6659867 | 57.728785  | 59.976479  | 0.068552549 | 5.86318622  | 0.438766521 | EXO84     |
| YKR029C   | 38.7335652 | 41.4988747 | 39.7048728 | 41.6856926 | 44.5671433 | 39.5754377 | 0.068535888 | 5.36058189  | 0.475318901 | SET3      |
| YLR392C   | 19.0708556 | 23.5985279 | 19.8524364 | 23.8288427 | 20.2637157 | 21.4985657 | 0.068494624 | 4.42594323  | 0.601327263 | ART10     |
| YAR002C-A | 334.529111 | 239.26605  | 285.015619 | 337.979318 | 281.737321 | 280.643438 | 0.068476687 | 8.196254    | 0.579620127 | ERP1      |
| YKL139W   | 30.5791305 | 33.7286277 | 31.5944263 | 29.7417069 | 32.4480078 | 38.4779133 | 0.068464063 | 5.03911821  | 0.55772755  | CTK1      |
| YDL222C   | 9.33814306 | 8.74872254 | 11.3788355 | 9.57884001 | 10.4602194 | 10.8461232 | 0.068459133 | 3.34769583  | 0.689787814 | FMP45     |
| YDL146W   | 41.1667434 | 39.0239071 | 42.065376  | 42.0995931 | 44.43683   | 41.6413659 | 0.068382671 | 5.38735376  | 0.465304506 | LDB17     |
| YGR122W   | 20.583717  | 24.9223478 | 22.5760939 | 24.3018719 | 23.4563912 | 23.6936144 | 0.068290758 | 4.54791263  | 0.565946856 | YGR122W   |
| YLR209C   | 76.4807069 | 64.8671731 | 70.6335162 | 79.8236667 | 71.0858967 | 71.1454035 | 0.06818266  | 6.17905839  | 0.469330151 | PNP1      |
| YMR010W   | 125.670362 | 110.390565 | 125.227716 | 114.709566 | 126.534199 | 137.513348 | 0.068097885 | 6.94771166  | 0.473082509 | YMR010W   |
| YPL003W   | 44.1917756 | 43.7436127 | 42.1259017 | 49.7863166 | 44.6974566 | 41.7704864 | 0.068044377 | 5.47625801  | 0.492480859 | ULA1      |
| YIL103W   | 48.1374699 | 56.1184505 | 49.7521425 | 56.2904672 | 49.5587599 | 51.6482058 | 0.067968489 | 5.72031923  | 0.472629306 | DPH1      |
| YNL271C   | 260.021251 | 219.754096 | 260.079022 | 259.101709 | 259.584063 | 256.756143 | 0.067958767 | 7.98104699  | 0.478095858 | BNH1      |
| YPR005C   | 11.9686059 | 11.1085753 | 11.3788355 | 12.4170148 | 10.9463159 | 12.7183707 | 0.067929203 | 3.5701878   | 0.650993466 | HAL1      |
| YCL033C   | 32.3546929 | 31.1385454 | 30.565489  | 32.7572677 | 30.4933086 | 35.3144607 | 0.067912972 | 5.01002883  | 0.51964136  | MXR2      |
| YHR031C   | 56.5549509 | 53.2405813 | 58.1652177 | 58.300841  | 58.4455081 | 59.2663162 | 0.067823039 | 5.84414396  | 0.430995484 | RRM3      |
| YOR073W-A | 2.23589341 | 1.95695109 | 2.36050311 | 2.01037383 | 2.67142233 | 2.19504875 | 0.067798481 | 1.2363554   | 0.83265144  | YOR073W-A |
| YEL015W   | 80.6236859 | 82.1343886 | 75.9597796 | 86.0321741 | 80.4684532 | 83.6700934 | 0.067794101 | 6.3506274   | 0.41362489  | EDC3      |
| YHL011C   | 189.853655 | 188.212649 | 194.650718 | 201.806055 | 200.486988 | 197.941749 | 0.067729181 | 7.61186674  | 0.428324864 | PRS3      |
| YPR135W   | 77.4671305 | 76.2635353 | 66.0940871 | 84.2583149 | 76.493898  | 69.5313971 | 0.067698203 | 6.23164047  | 0.495368963 | CTF4      |
| YEL008W   | 0.98642356 | 0.97847555 | 1.1499887  | 1.1234442  | 1.10766292 | 1.03296412 | 0.06756033  | 0.24774558  | 0.865508553 | YEL008W   |
| YHR088W   | 44.2575372 | 42.9378093 | 41.4601187 | 42.7500082 | 45.2187097 | 46.8707468 | 0.06753596  | 5.46040937  | 0.465074207 | RPF1      |
| YLR180W   | 737.844825 | 592.150378 | 751.305772 | 744.666117 | 730.340803 | 705.837293 | 0.06747658  | 9.47262165  | 0.52529376  | SAM1      |

|           |            |            |            |            |            |            |             |            |             |           |
|-----------|------------|------------|------------|------------|------------|------------|-------------|------------|-------------|-----------|
| YMR110C   | 89.5014979 | 98.7684729 | 100.472697 | 99.927405  | 101.383735 | 101.359604 | 0.067468772 | 6.62494679 | 0.419826357 | HFD1      |
| YIL024C   | 8.61476578 | 8.17314869 | 9.0183324  | 8.69191038 | 8.86130335 | 9.49035782 | 0.06744053  | 3.1581786  | 0.676643172 | YIL024C   |
| YGL207W   | 399.501543 | 381.432791 | 386.638304 | 427.795725 | 399.93147  | 395.625257 | 0.067427465 | 8.63883695 | 0.448105663 | SPT16     |
| YML061C   | 77.8616999 | 70.7380263 | 71.2992991 | 78.5228366 | 77.4712477 | 74.3088561 | 0.067383715 | 6.23169429 | 0.427470663 | PIF1      |
| YDL037C   | 72.1404432 | 60.2625822 | 83.8281233 | 50.1410884 | 82.2276825 | 94.2579756 | 0.067362462 | 6.20721661 | 0.708809331 | BSC1      |
| YJR062C   | 45.8358149 | 43.9738422 | 45.6363935 | 49.0767729 | 46.6521559 | 46.0960237 | 0.067064804 | 5.53402508 | 0.456473818 | NTA1      |
| YJR084W   | 25.6470126 | 30.6780863 | 27.2365744 | 29.6825783 | 30.4281519 | 27.5026696 | 0.067056912 | 4.8411568  | 0.552863982 | YJR084W   |
| YPL167C   | 39.9830351 | 44.7220883 | 40.1890786 | 42.8091368 | 47.6295055 | 40.4792813 | 0.067020197 | 5.41824874 | 0.504949462 | REV3      |
| YPR148C   | 80.5579243 | 84.3215692 | 79.5307971 | 89.9937931 | 85.6809846 | 80.31296   | 0.066902679 | 6.38422595 | 0.428967306 | YPR148C   |
| YGR154C   | 13.8756915 | 13.6986577 | 13.9209158 | 15.0186751 | 16.0936906 | 12.3310091 | 0.066556865 | 3.83593051 | 0.664487573 | GTO1      |
| YBR243C   | 167.428959 | 124.784411 | 146.653821 | 162.012479 | 149.013241 | 148.359471 | 0.066533593 | 7.22702574 | 0.532037382 | ALG7      |
| YJL103C   | 21.0437027 | 20.9508882 | 20.3971679 | 20.1037383 | 23.130608  | 22.1441682 | 0.066493499 | 4.42016885 | 0.575653743 | GSM1      |
| YBR155W   | 35.708533  | 37.0093986 | 39.3417185 | 39.970962  | 39.159142  | 38.2196723 | 0.066366933 | 5.26161795 | 0.548915182 | CNS1      |
| YFL001W   | 42.9423058 | 51.6865319 | 39.5838214 | 46.8298845 | 47.1082524 | 46.677066  | 0.066330779 | 5.52162143 | 0.535844711 | DEG1      |
| YBR141C   | 23.0165498 | 19.9724126 | 20.6392708 | 22.5871412 | 20.5243423 | 23.4353734 | 0.066305401 | 4.446977   | 0.595192668 | BMT2      |
| YMR128W   | 170.980084 | 155.635169 | 156.882668 | 169.876588 | 172.534789 | 163.724812 | 0.066258457 | 7.36678367 | 0.445281999 | ECM16     |
| YJL049W   | 16.243108  | 18.8788223 | 15.8577388 | 19.4533232 | 17.6574501 | 16.2691848 | 0.066203591 | 4.13184432 | 0.632505778 | YJL049W   |
| YIL173W   | 58.2647518 | 64.6369435 | 45.4548163 | 65.1597635 | 59.6834843 | 51.3899648 | 0.066184025 | 5.84722285 | 0.604648551 | VTH1      |
| YLR328W   | 74.9024292 | 79.3140767 | 69.3019503 | 70.1856981 | 78.5789106 | 85.3486601 | 0.066123038 | 6.25523495 | 0.488727697 | NMA1      |
| YIL107C   | 42.0216438 | 49.7871381 | 37.9496269 | 46.0612121 | 46.7824691 | 43.0616916 | 0.066083038 | 5.47284403 | 0.549161806 | PKF26     |
| YML011C   | 6.57615709 | 9.15162424 | 8.17097231 | 8.10062396 | 7.75364043 | 9.23211679 | 0.066023019 | 3.05303077 | 0.726649193 | RAD33     |
| YDL117W   | 104.23209  | 118.913558 | 110.943646 | 116.365167 | 115.392413 | 118.080711 | 0.065992274 | 6.83440497 | 0.432874209 | CYK3      |
| YLR398C   | 186.828623 | 176.701172 | 179.700865 | 199.086138 | 187.911756 | 181.543443 | 0.065940117 | 7.53463714 | 0.4537117   | SKI2      |
| YDL223C   | 52.1489257 | 46.3912524 | 51.6284398 | 51.0280181 | 53.4284467 | 52.6811699 | 0.065906178 | 5.68169794 | 0.472531136 | HBT1      |
| YKL124W   | 25.3839664 | 27.800217  | 25.8444828 | 29.9782215 | 24.8246807 | 27.8900311 | 0.065860307 | 4.75970014 | 0.573540252 | SSH4      |
| YDR452W   | 268.701779 | 236.560853 | 242.829192 | 284.231382 | 247.464927 | 251.07484  | 0.065673476 | 7.99585177 | 0.499390214 | PPN1      |
| YNL118C   | 201.427692 | 191.781207 | 188.477095 | 197.726179 | 209.152822 | 201.879924 | 0.065666244 | 7.63314842 | 0.451909073 | DCP2      |
| YGL228W   | 144.41241  | 125.24487  | 126.377705 | 146.343389 | 138.718491 | 129.249635 | 0.06565677  | 7.07866714 | 0.477086181 | SHE10     |
| YDL190C   | 191.234648 | 166.110614 | 180.003494 | 191.990701 | 184.653924 | 185.546179 | 0.06552158  | 7.51861237 | 0.469672625 | UFD2      |
| YJL059W   | 41.6928359 | 34.2466442 | 32.1996835 | 35.7136998 | 38.1817924 | 39.1880762 | 0.065462385 | 5.2083135  | 0.571732521 | YHC3      |
| YNL056W   | 18.544763  | 22.0444785 | 15.8577388 | 20.813282  | 19.6121493 | 18.6579143 | 0.065327346 | 4.27729402 | 0.654929751 | OCA2      |
| YGL197W   | 162.694126 | 152.181726 | 160.937892 | 157.932603 | 169.2118   | 170.63276  | 0.065095921 | 7.34319529 | 0.448031164 | MDS3      |
| YPR087W   | 7.69410379 | 8.74872254 | 9.07885812 | 8.33713852 | 8.60067678 | 9.8131591  | 0.065081264 | 3.14358401 | 0.700958651 | VPS69     |
| YML057C-A | 11.9028443 | 12.4899526 | 12.8919785 | 9.57884001 | 13.3571117 | 16.1400643 | 0.065081129 | 3.68175975 | 0.731538741 | YML057C-A |
| YNL275W   | 50.7021711 | 44.9523178 | 54.6547259 | 45.1151539 | 51.6692173 | 60.4929611 | 0.065024173 | 5.68272999 | 0.579598954 | BOR1      |
| YPL123C   | 19.8599944 | 21.5840194 | 20.155065  | 22.3506267 | 21.9577884 | 20.1428003 | 0.064983809 | 4.4018106  | 0.5863736   | RNY1      |
| YAL010C   | 20.4518485 | 24.4618887 | 20.4576936 | 20.9906679 | 25.4110905 | 22.079608  | 0.064862759 | 4.48757418 | 0.615471967 | MDM10     |
| YIL230C   | 20.5833717 | 19.3392814 | 20.155065  | 20.1037383 | 20.2637157 | 22.4669695 | 0.064828305 | 4.36462336 | 0.591810799 | ELA1      |
| YJR046W   | 120.212152 | 104.754441 | 115.543601 | 122.100646 | 119.301812 | 114.594457 | 0.064709599 | 6.86045241 | 0.454758535 | TAH11     |
| YIL022W   | 150.593997 | 141.76384  | 153.856382 | 150.718908 | 152.922639 | 163.01465  | 0.064653346 | 7.25038748 | 0.445406059 | TIM44     |
| YNR033W   | 112.320763 | 98.5958007 | 113.848881 | 114.000022 | 110.114725 | 115.43374  | 0.064635612 | 6.79224191 | 0.460326342 | ABZ1      |
| YDR362C   | 49.7815091 | 52.5498926 | 52.1126456 | 54.1618361 | 53.1678201 | 54.2306161 | 0.064633967 | 5.72230555 | 0.453483238 | TFC6      |
| YOR236W   | 23.2138345 | 28.3182335 | 19.3682307 | 27.1991753 | 23.5215479 | 23.4353734 | 0.064569417 | 4.60396796 | 0.658854489 | DFR1      |
| YPR136C   | 8.61476578 | 6.61909929 | 7.44466366 | 7.27282297 | 9.77349634 | 6.6497065  | 0.064516823 | 2.9698499  | 0.751189686 | YPR136C   |
| YLR001C   | 82.4650099 | 78.8536176 | 79.8939514 | 79.3506376 | 86.4628643 | 86.4461845 | 0.064452316 | 6.36382173 | 0.437066587 | YLR001C   |
| YKR043C   | 215.434906 | 207.78216  | 205.484822 | 232.198177 | 213.192533 | 211.822204 | 0.064185181 | 7.74445989 | 0.470026495 | SHB17     |
| YLR106C   | 371.421352 | 338.149638 | 372.051606 | 373.57476  | 399.214747 | 357.922066 | 0.064089324 | 8.5268325  | 0.489007805 | MDN1      |
| YNR001C   | 235.68947  | 225.452278 | 215.653143 | 252.774945 | 241.991769 | 212.661487 | 0.064054764 | 7.85067788 | 0.505238129 | CIT1      |
| YAL041W   | 144.478171 | 144.641709 | 143.14333  | 143.978243 | 153.965146 | 153.976214 | 0.063986845 | 7.20437739 | 0.435877695 | CDC24     |
| YMR106C   | 26.6991978 | 23.8287574 | 27.1760486 | 26.3713743 | 30.0372121 | 24.7911388 | 0.06384377  | 4.73315194 | 0.596059091 | YKU80     |
| YNL049C   | 138.296584 | 134.511609 | 133.51974  | 134.695047 | 143.2143   | 146.810025 | 0.063767923 | 7.11500676 | 0.441273749 | SFB2      |
| YGR190C   | 29.5927069 | 20.4328717 | 29.5970775 | 24.4201292 | 28.9947058 | 29.7622786 | 0.063718183 | 4.76677619 | 0.674865986 | YGR190C   |
| YJL166W   | 16.703439  | 27.3397579 | 19.3077049 | 23.1784277 | 20.9152822 | 22.2087285 | 0.063700899 | 4.44397289 | 0.699201211 | QCR8      |
| YBR229C   | 275.86979  | 217.451801 | 257.052736 | 243.255233 | 261.082666 | 279.804155 | 0.063637583 | 7.99914237 | 0.548832915 | ROT2      |
| YOR191W   | 165.653397 | 160.757777 | 161.6642   | 170.349618 | 171.622596 | 168.05035  | 0.063534879 | 7.37910826 | 0.445269982 | ULS1      |
| YMR190C   | 75.1654755 | 72.63742   | 79.1071171 | 80.1193099 | 78.2531274 | 78.6989536 | 0.063412735 | 6.27523027 | 0.441367005 | SGS1      |
| YHR070W   | 80.2291165 | 74.1914694 | 86.7333579 | 77.3402637 | 85.7461412 | 88.8994743 | 0.063180928 | 6.36280053 | 0.494116002 | TRM5      |
| YJL151C   | 86.8710351 | 71.0833706 | 83.0412889 | 76.8672346 | 84.5733217 | 90.2552397 | 0.062947284 | 6.36130305 | 0.525376053 | SNA3      |
| YER029C   | 16.3746311 | 18.4183632 | 19.4892821 | 23.1784277 | 18.765113  | 14.7197387 | 0.062782975 | 4.22031326 | 0.710500136 | SMB1      |
| YBR187W   | 233.716623 | 192.932355 | 234.113488 | 227.7044   | 226.875428 | 235.451258 | 0.062729476 | 7.81531394 | 0.524964273 | GDT1      |
| YEL073C   | 1.38099299 | 1.49649201 | 1.69472018 | 1.41908741 | 2.15016919 | 1.22664489 | 0.06272333  | 0.75137277 | 0.898464205 | YEL073C   |
| YLR449W   | 198.534182 | 196.673585 | 201.671702 | 228.413944 | 202.246218 | 192.647808 | 0.06271751  | 7.66886583 | 0.503099408 | FFR4      |
| YBL047C   | 595.865594 | 492.691217 | 591.638921 | 528.432674 | 602.764098 | 623.522965 | 0.062628544 | 9.16133789 | 0.556834742 | EDE1      |
| YPR057W   | 35.708533  | 38.6210054 | 34.0759808 | 42.454365  | 36.0967798 | 34.6042979 | 0.062499153 | 5.21202349 | 0.573359396 | BRR1      |
| YKR028W   | 265.545223 | 220.099441 | 263.65004  | 274.475156 | 256.391387 | 251.397642 | 0.06238146  | 7.99646742 | 0.532693217 | SAP190    |
| YCR105W   | 8.28595793 | 8.69116516 | 10.2288468 | 7.39108025 | 10.555376  | 10.5233219 | 0.062161431 | 3.23122235 | 0.742453787 | ADH7      |
| YIR033W   | 171.045846 | 183.838288 | 173.890396 | 171.768705 | 189.345202 | 191.033801 | 0.062091622 | 7.49404052 | 0.486844591 | MG2A      |
| YPL258C   | 19.8599944 | 24.3467739 | 21.4261052 | 23.2375563 | 24.4988975 | 20.8529631 | 0.062057519 | 4.49222561 | 0.62404836  | THI21     |
| YOL098C   | 268.899063 | 256.705938 | 269.278932 | 270.572666 | 283.170767 | 276.05966  | 0.06203747  | 8.08159846 | 0.475864915 | YOL098C   |
| YER134C   | 20.4518485 | 27.4548727 | 21.3655794 | 24.774901  | 25.8020303 | 21.821367  | 0.062033064 | 4.5700747  | 0.653236992 | YER134C   |
| YAL035W   | 1110.18684 | 907.910193 | 1002.24541 | 1220.65169 | 1010.05827 | 922.049594 | 0.061982141 | 10.0069908 | 0.602111903 | FUN12     |
| YDR330W   | 39.7199888 | 42.1320059 | 37.1022668 | 44.1690956 | 41.0486846 | 38.9298351 | 0.061943164 | 5.34513939 | 0.538269544 | UBX5      |
| YJR125C   | 82.596533  | 92.0918162 | 87.8228209 | 91.826781  | 90.8283593 | 91.4173243 | 0.061705665 | 6.48480744 | 0.455259526 | ENT3      |

|         |            |            |            |            |            |            |             |            |             |         |
|---------|------------|------------|------------|------------|------------|------------|-------------|------------|-------------|---------|
| YHL035C | 110.479439 | 114.366524 | 135.396037 | 119.3216   | 117.02133  | 139.708397 | 0.061702073 | 6.94061482 | 0.548715848 | VMR1    |
| YDR107C | 79.6372623 | 63.5433532 | 80.3781572 | 76.0985623 | 74.669512  | 82.4434485 | 0.061599003 | 6.252353   | 0.547634459 | TMN2    |
| YOR109W | 223.063248 | 219.523867 | 222.310972 | 236.987597 | 225.637452 | 231.190281 | 0.061500157 | 7.82384976 | 0.474830085 | INP53   |
| YGR207C | 48.4005162 | 59.1114345 | 51.4468627 | 61.6711736 | 52.3207837 | 51.9064468 | 0.061457623 | 5.76265522 | 0.564668699 | CIR1    |
| YER022W | 37.089526  | 44.088957  | 38.373307  | 42.5726222 | 43.0685405 | 39.1880762 | 0.061384758 | 5.35282253 | 0.549443796 | SRB4    |
| YOR190W | 12.9550295 | 11.6841492 | 16.2814189 | 12.1213716 | 14.5950879 | 16.0109438 | 0.061232726 | 3.81250306 | 0.732631225 | SPR1    |
| YDR254W | 34.5905863 | 36.5489396 | 30.7470662 | 36.8962726 | 34.1420805 | 35.2499005 | 0.061193435 | 5.12202839 | 0.562117802 | CHL4    |
| YDR054C | 66.8795176 | 75.9757484 | 68.8177445 | 71.9595573 | 75.7120183 | 73.275892  | 0.06104716  | 6.17456321 | 0.478089462 | CDC34   |
| YNL132W | 304.476073 | 294.751369 | 293.791849 | 311.489686 | 312.882196 | 307.177704 | 0.06098821  | 8.24894145 | 0.479764344 | KRE33   |
| YGL242C | 34.3933016 | 37.1245134 | 30.141809  | 42.5134936 | 35.1845868 | 28.2773927 | 0.060836139 | 5.11897882 | 0.670013168 | YGL242C |
| YER080W | 165.78492  | 157.937465 | 159.848429 | 181.879703 | 164.715992 | 157.656148 | 0.060751915 | 7.36425854 | 0.498410282 | AIM9    |
| YJR118C | 76.4149453 | 69.644436  | 71.4203505 | 81.9522978 | 76.0378015 | 68.6921137 | 0.060704427 | 6.21238055 | 0.5133238   | ILM1    |
| YGR235C | 27.7513829 | 34.1890868 | 30.0207575 | 31.1016657 | 32.8389477 | 32.0864479 | 0.060592862 | 4.97564767 | 0.580623976 | MIC26   |
| YLR250W | 65.6300477 | 71.8316167 | 64.0967383 | 76.63072   | 66.850715  | 66.6907458 | 0.06058708  | 6.10349994 | 0.516945953 | SSP120  |
| YHR081W | 8.61476578 | 12.4323952 | 9.74464105 | 12.4170148 | 10.1644362 | 9.55491807 | 0.060468993 | 3.41128569 | 0.757150338 | LRP1    |
| YBR142W | 120.475198 | 123.690821 | 119.65935  | 124.879692 | 128.944995 | 125.5697   | 0.060301589 | 6.95410271 | 0.451983664 | MAK5    |
| YJL083W | 42.5477364 | 38.2756611 | 36.9206897 | 44.6421247 | 40.5925881 | 37.380389  | 0.060008028 | 5.32848479 | 0.577588146 | TAX4    |
| YKL050C | 26.2388668 | 23.5985279 | 22.757671  | 27.3174326 | 24.2382709 | 24.0164157 | 0.059930933 | 4.63323467 | 0.62136123  | YKL050C |
| YHR119W | 123.105661 | 109.646819 | 120.385659 | 126.239651 | 122.299018 | 119.436476 | 0.059845785 | 6.91051687 | 0.482681927 | SET1    |
| YOL103W | 212.804443 | 191.090519 | 212.929486 | 211.089252 | 210.390798 | 221.377122 | 0.059766626 | 7.71465341 | 0.507989798 | ITR2    |
| YOL124C | 83.4514334 | 97.5597678 | 95.6911646 | 96.7344583 | 95.5196376 | 96.2593436 | 0.059699342 | 6.5597664  | 0.494496559 | TRM11   |
| YPR146C | 6.3131108  | 5.58306636 | 4.84205766 | 4.49377679 | 6.71113415 | 6.26234495 | 0.059685189 | 2.53756398 | 0.800518455 | YPR146C |
| YHL013C | 26.9622441 | 28.2606761 | 27.2365744 | 30.0373501 | 26.1278135 | 29.7622786 | 0.05967045  | 4.81736505 | 0.58971228  | OTU2    |
| YBR077C | 15.2566844 | 15.5980514 | 15.615636  | 17.2064348 | 16.6801004 | 14.5260579 | 0.059610452 | 3.99480781 | 0.659490084 | SLM4    |
| YIL033C | 146.253734 | 129.619231 | 146.714347 | 140.312267 | 153.834832 | 146.099862 | 0.059170416 | 7.16905796 | 0.504261162 | BCY1    |
| YDR127W | 374.775192 | 308.450027 | 367.451651 | 366.893224 | 372.370211 | 355.145975 | 0.058977702 | 8.48229118 | 0.5500784   | ARO1    |
| YNL047C | 66.813756  | 70.2200099 | 65.4283042 | 70.8952418 | 71.4116799 | 68.6275535 | 0.058938158 | 6.10905271 | 0.480419889 | SLM2    |
| YGR049W | 21.5697952 | 21.7566916 | 21.4261052 | 23.7697141 | 22.0881017 | 21.5631259 | 0.058924984 | 4.46967631 | 0.614126439 | SCM4    |
| YKR081C | 70.2991193 | 70.5077968 | 69.6651046 | 71.9595573 | 73.2360659 | 74.0506151 | 0.058789542 | 6.16470754 | 0.46650344  | RPF2    |
| YJR098C | 15.2566844 | 19.281724  | 16.5235218 | 16.2603766 | 18.3090165 | 18.7224746 | 0.058788301 | 4.13100637 | 0.673804347 | YJR098C |
| YOR059C | 26.4361515 | 32.57748   | 28.2655116 | 30.9242798 | 29.8471422 | 30.2142004 | 0.058566344 | 4.89954659 | 0.599928228 | LPL1    |
| YOL033W | 26.7649593 | 31.3687749 | 26.87342   | 31.3973089 | 29.7114289 | 27.4381093 | 0.058334646 | 4.86114035 | 0.611254372 | MSE1    |
| YOL061W | 352.745066 | 290.146778 | 336.038802 | 323.138029 | 335.621864 | 360.439916 | 0.0582606   | 8.37991036 | 0.560564608 | PRS5    |
| YGR211W | 162.233795 | 184.068518 | 173.103561 | 185.959579 | 177.812477 | 177.088786 | 0.058225302 | 7.46635683 | 0.513787803 | ZPR1    |
| YFR038W | 102.259243 | 99.4016041 | 98.9595535 | 101.346492 | 108.941906 | 102.715369 | 0.058186748 | 6.67788083 | 0.473209644 | IRC5    |
| YDR190C | 154.47393  | 154.944481 | 156.337937 | 176.617254 | 154.486399 | 153.717973 | 0.058145436 | 7.30891045 | 0.513327413 | RVB1    |
| YHL020C | 53.4641571 | 55.1975324 | 61.8572867 | 59.7199284 | 58.0545683 | 59.7827982 | 0.058109165 | 5.86145692 | 0.520666363 | OPI1    |
| YFL038C | 160.984325 | 166.455958 | 157.00372  | 189.566426 | 170.058836 | 144.614976 | 0.057995853 | 7.3656121  | 0.574008962 | YPT1    |
| YDR103W | 108.506592 | 112.064229 | 108.34104  | 110.688818 | 115.131787 | 116.595825 | 0.057778692 | 6.80746884 | 0.472163997 | STE5    |
| YJL194W | 34.6563478 | 34.1315294 | 33.168095  | 35.5363138 | 35.8361532 | 34.7334184 | 0.05777654  | 5.1209304  | 0.549529157 | CDC6    |
| YER110C | 762.505414 | 622.252891 | 770.068746 | 722.256362 | 770.998548 | 749.415466 | 0.057690287 | 9.51770643 | 0.578290257 | KAP123  |
| YPR175W | 46.6249537 | 46.2761377 | 43.8811476 | 47.066399  | 50.0403013 | 45.2567403 | 0.05768392  | 5.5436092  | 0.52989143  | DPB2    |
| YLL003W | 50.7679327 | 57.7876147 | 55.3205088 | 56.2313386 | 59.8137976 | 54.6179776 | 0.057606539 | 5.80443022 | 0.526117778 | SFI1    |
| YBR267W | 72.9953437 | 74.421699  | 76.9887169 | 74.5612176 | 81.1200196 | 77.9242305 | 0.057489599 | 6.25652481 | 0.486453517 | REI1    |
| YPL207W | 273.568135 | 245.42469  | 264.315823 | 282.694037 | 266.751293 | 265.536338 | 0.057387864 | 8.05799035 | 0.527894964 | TYW1    |
| YHR099W | 256.798934 | 243.813083 | 251.726473 | 232.316434 | 277.436983 | 273.154448 | 0.057344135 | 7.99988031 | 0.553099495 | TRA1    |
| YIL150C | 24.3975428 | 23.5985279 | 22.0918881 | 23.119299  | 25.9975003 | 23.8227349 | 0.057293783 | 4.58208396 | 0.62293503  | MCM10   |
| YDL218W | 7.62834222 | 6.90688622 | 8.41307519 | 8.1597526  | 7.49301386 | 8.19915267 | 0.057143653 | 2.98583396 | 0.743435967 | YDL218W |
| YIL039W | 216.158283 | 206.515898 | 208.390057 | 223.151495 | 210.716581 | 222.603767 | 0.057080672 | 7.74624494 | 0.511653156 | TED1    |
| YDR301W | 142.176516 | 134.972068 | 138.906529 | 135.40459  | 149.208711 | 148.16579  | 0.056764873 | 7.14550321 | 0.502184328 | CFT1    |
| YGR288W | 12.4289369 | 12.0294935 | 14.2840701 | 12.9491726 | 12.1191355 | 15.2362207 | 0.056718438 | 3.73281035 | 0.720135457 | MAL13   |
| YGL097W | 157.433201 | 154.484022 | 158.69844  | 169.403559 | 161.653629 | 158.366311 | 0.056696303 | 7.32311367 | 0.499151228 | SRM1    |
| YNR065C | 78.7823619 | 69.8171082 | 69.6651046 | 73.9699312 | 80.5987665 | 72.3720484 | 0.056686624 | 6.21547399 | 0.53111714  | YNR065C |
| YER129W | 151.580421 | 138.655741 | 152.282714 | 145.042559 | 161.327846 | 153.847093 | 0.056578599 | 7.23424179 | 0.516389311 | SAK1    |
| YDR018C | 6.18158766 | 7.13711576 | 7.02098361 | 6.85892247 | 7.42785722 | 6.90794753 | 0.056524671 | 2.8174854  | 0.736207861 | YDR018C |
| YDR480W | 18.8735708 | 18.9363797 | 20.820848  | 19.6898378 | 18.569643  | 22.7252106 | 0.056354157 | 4.32608298 | 0.66822399  | DIG2    |
| YGL037C | 135.600359 | 160.930449 | 134.427626 | 144.865173 | 150.77247  | 152.620448 | 0.056338399 | 7.19640327 | 0.543863659 | PNC1    |
| YJL163C | 33.9329706 | 27.8577744 | 28.7497174 | 30.7468938 | 31.8615981 | 31.4408453 | 0.056232715 | 4.94817219 | 0.620344567 | YJL163C |
| YPR014C | 0.65761571 | 1.66916417 | 0.90788581 | 1.00518691 | 1.62891606 | 0.77472309 | 0.056186703 | 0.30789333 | 0.887264913 | YPR014C |
| YOR137C | 58.5277981 | 57.2120408 | 66.6993443 | 59.956443  | 61.7033402 | 68.0465112 | 0.056005062 | 5.95748578 | 0.555233259 | SIA1    |
| YKL121W | 40.7064124 | 41.6139895 | 41.1574901 | 39.2022897 | 43.524637  | 45.7086621 | 0.055835315 | 5.39577624 | 0.564634193 | DGR2    |
| YPL260W | 96.6695092 | 104.466654 | 92.7254043 | 108.264544 | 99.3638795 | 97.8087898 | 0.055806864 | 6.644107   | 0.521995087 | YPL260W |
| YOR297C | 32.1574082 | 27.5699875 | 31.5339005 | 28.4408768 | 33.685984  | 32.7320504 | 0.055783073 | 4.95989523 | 0.627450755 | TIM18   |
| YDR144C | 162.299557 | 142.914987 | 154.280062 | 152.965797 | 159.764087 | 164.822337 | 0.055781499 | 7.28800711 | 0.524887608 | MKG7    |
| YNL329C | 99.8918261 | 91.8615867 | 96.3569475 | 92.9502252 | 105.74923  | 100.778562 | 0.055770821 | 6.61527975 | 0.519451739 | PEX6    |
| YJL062W | 181.962267 | 151.088136 | 168.32203  | 155.153557 | 177.16091  | 188.774192 | 0.055711494 | 7.41367084 | 0.588597362 | LAS21   |
| YML023C | 94.8939468 | 76.8391092 | 96.1148446 | 91.1172373 | 86.9189608 | 100.26208  | 0.055710302 | 6.50987016 | 0.587508269 | NSE5    |
| YDR383C | 8.02291165 | 10.2452146 | 9.0183324  | 10.1701264 | 8.34005021 | 9.87771936 | 0.055685118 | 3.2354868  | 0.745151913 | NKP1    |
| YGR290W | 1.18370828 | 0.57557385 | 1.69472018 | 1.41908741 | 1.17281956 | 0.96840386 | 0.055674297 | 0.36850892 | 1           | YGR290W |
| YLL010C | 109.624539 | 102.56726  | 112.759418 | 104.894211 | 117.412269 | 115.43374  | 0.055552444 | 6.7886635  | 0.519864894 | PSR1    |
| YMR018W | 5.06364096 | 4.48947604 | 3.32891464 | 4.73029136 | 3.77908525 | 4.84201929 | 0.055475083 | 2.16768746 | 0.82551946  | YMR018W |
| YMR016C | 72.6007742 | 72.925207  | 71.541402  | 66.2832077 | 77.6015609 | 81.797846  | 0.055459441 | 6.20751956 | 0.552870598 | SOK2    |
| YOR262W | 50.0445554 | 44.9523178 | 52.1126456 | 51.7375618 | 52.5814103 | 48.4847532 | 0.055429703 | 5.64681176 | 0.562121827 | GPN2    |



|           |            |            |            |            |            |            |             |            |             |           |
|-----------|------------|------------|------------|------------|------------|------------|-------------|------------|-------------|-----------|
| YMR173W-A | 116.726788 | 140.094675 | 100.170068 | 133.630731 | 124.77497  | 112.528528 | 0.055182051 | 6.92438387 | 0.634524745 | YMR173W-A |
| YMR153W   | 53.0038261 | 62.0468612 | 54.2915716 | 58.6556129 | 58.3803515 | 59.0080751 | 0.055115568 | 5.85044132 | 0.5459712   | NUP53     |
| YPR023C   | 101.009773 | 90.0773077 | 88.4886038 | 99.2178613 | 100.210916 | 90.9008422 | 0.055040883 | 6.57134718 | 0.538693016 | EAF3      |
| YCR035C   | 60.8952146 | 67.6874849 | 62.7046467 | 68.6483534 | 63.8535094 | 66.238824  | 0.054851016 | 6.0254424  | 0.528207251 | RRP43     |
| YOR335C   | 987.081179 | 888.39824  | 934.153975 | 1033.86431 | 937.082829 | 947.163534 | 0.054715032 | 9.8989709  | 0.562710931 | ALA1      |
| YOL148C   | 46.2961459 | 50.2475972 | 46.4837536 | 45.9429548 | 51.2782775 | 51.454525  | 0.054703963 | 5.60695111 | 0.555660106 | SPT20     |
| YNL232W   | 44.2575372 | 51.8016466 | 49.0863596 | 52.68362   | 49.6493614 | 48.4847532 | 0.054693904 | 5.62836605 | 0.565886554 | CSL4      |
| YJL097W   | 99.9575877 | 77.1844535 | 95.9937932 | 81.597526  | 90.1767929 | 111.882926 | 0.054656648 | 6.53742368 | 0.660587329 | PHS1      |
| YJL075C   | 21.6355568 | 21.1235603 | 22.5760939 | 26.9035321 | 24.1079576 | 16.7856669 | 0.054620322 | 4.48065745 | 0.736745081 | APQ13     |
| YNL080C   | 96.6695092 | 68.2055014 | 87.2175637 | 83.075742  | 84.1823818 | 94.3870961 | 0.054314956 | 6.4214722  | 0.643435652 | EOS1      |
| YOR091W   | 85.5558037 | 76.5513222 | 85.6438949 | 89.3433781 | 82.2276825 | 85.5423409 | 0.054226149 | 6.39683533 | 0.532487633 | TMA46     |
| YMR055C   | 26.9622441 | 22.2171507 | 23.7866083 | 26.6078889 | 26.1278135 | 22.9188913 | 0.054221939 | 4.63715239 | 0.668299238 | BUB2      |
| YMR232W   | 10.1930435 | 9.38185378 | 9.92621821 | 8.98755359 | 11.2069425 | 10.4587617 | 0.0542135   | 3.34143528 | 0.732259254 | FUS2      |
| YOR326W   | 625.524062 | 625.765189 | 566.883901 | 623.866302 | 592.534505 | 568.453065 | 0.054210379 | 9.19011419 | 0.578348894 | MYO2      |
| YML081W   | 204.189678 | 213.365227 | 215.229463 | 206.477218 | 225.181356 | 225.444418 | 0.054194564 | 7.74886618 | 0.540696472 | TDA9      |
| YER152W-A | 22.1616494 | 16.7491991 | 21.9708366 | 19.0985514 | 19.3515228 | 24.7265785 | 0.054172821 | 4.37688824 | 0.728191261 | YER152W-A |
| YHR075C   | 16.5719159 | 20.778216  | 16.8261504 | 20.2219956 | 17.5922934 | 18.4642336 | 0.054065155 | 4.21345056 | 0.707223515 | PPE1      |
| YDR160W   | 81.2813016 | 75.5152893 | 80.6202601 | 81.3018828 | 83.0747189 | 82.056087  | 0.054044613 | 6.33551899 | 0.509252114 | SSY1      |
| YGL230C   | 1.77556241 | 0.97847555 | 1.93682307 | 1.47821605 | 1.43344613 | 1.93680772 | 0.053961713 | 0.77020526 | 0.902626    | YGL230C   |
| YLR039C   | 83.977526  | 92.4371605 | 78.9255399 | 93.0093539 | 86.332551  | 85.7360216 | 0.053954048 | 6.44079499 | 0.545902479 | RIC1      |
| YNL002C   | 97.7216943 | 111.776442 | 99.7463879 | 122.928447 | 105.097664 | 92.9667705 | 0.05394548  | 6.71682739 | 0.611702708 | RLP7      |
| YPL047W   | 4.53754839 | 4.60459081 | 5.99204636 | 4.96680593 | 4.95190481 | 5.81042315 | 0.053867379 | 2.39691719 | 0.813872477 | SGF11     |
| YOR149C   | 59.3169369 | 47.7150723 | 57.9836405 | 52.1514623 | 54.7315795 | 64.3665765 | 0.053859756 | 5.811043   | 0.631480412 | SMP3      |
| YGL173C   | 616.909296 | 564.81062  | 602.896705 | 584.604884 | 650.328446 | 617.26062  | 0.053624902 | 9.24375253 | 0.563197386 | XRN1      |
| YNL156C   | 63.2626312 | 63.7735827 | 68.2124873 | 65.3962781 | 65.4824255 | 71.7910061 | 0.053489545 | 6.05398988 | 0.539056095 | NSG2      |
| YBL100C   | 9.07509678 | 8.34582085 | 9.320961   | 8.75103902 | 9.12192992 | 9.87771936 | 0.053400049 | 3.20138985 | 0.7505647   | YBL100C   |
| YKR087C   | 37.8129032 | 47.3121706 | 39.7048728 | 42.7500082 | 42.6776007 | 44.2237762 | 0.053280041 | 5.41109759 | 0.60831066  | OMA1      |
| YNR031C   | 153.355983 | 150.167218 | 158.637914 | 160.061234 | 164.129582 | 155.331979 | 0.053228352 | 7.2952467  | 0.522568926 | SSK2      |
| YGR266W   | 61.8158766 | 67.2845832 | 65.9125099 | 71.7821714 | 70.1737037 | 60.3638405 | 0.053009385 | 6.05218101 | 0.572901638 | YGR266W   |
| YIL005W   | 121.132814 | 113.272934 | 123.956676 | 123.874505 | 120.083692 | 127.764749 | 0.053003676 | 6.92835673 | 0.525029752 | EPS1      |
| YAL017W   | 175.977964 | 144.296365 | 172.256201 | 171.473062 | 169.276957 | 169.987157 | 0.052713601 | 7.38646264 | 0.582645296 | PSK1      |
| YLR105C   | 28.1459523 | 30.5054141 | 26.3286885 | 26.5487603 | 30.8842484 | 30.7952427 | 0.052618736 | 4.85724895 | 0.6439517   | SEN2      |
| YCR072C   | 91.2770604 | 98.7684729 | 99.0200792 | 93.8962835 | 100.797326 | 105.233219 | 0.052569962 | 6.61893632 | 0.538013469 | RSA4      |
| YFR024C-A | 271.332241 | 241.165444 | 258.142199 | 279.08719  | 259.518906 | 260.500638 | 0.052559935 | 8.0320047  | 0.567326804 | LSB3      |
| YDR505C   | 139.348769 | 133.245347 | 143.809113 | 138.597537 | 145.299312 | 147.907549 | 0.052351932 | 7.1444851  | 0.530638666 | PSP1      |
| YBR058C   | 106.928314 | 121.446083 | 115.906755 | 118.43467  | 120.214005 | 118.468072 | 0.052339396 | 6.87075101 | 0.531938716 | UBP14     |
| YAL048C   | 44.3890603 | 39.4268088 | 44.3653533 | 43.282166  | 45.4793363 | 44.0946557 | 0.05220035  | 5.44686344 | 0.585131177 | GEM1      |
| YJL197W   | 146.385257 | 142.396971 | 145.927513 | 155.035299 | 153.183266 | 142.419928 | 0.052090723 | 7.20634382 | 0.532647816 | UBP12     |
| YBR137W   | 11.2452286 | 17.036986  | 13.3761843 | 16.6151484 | 15.1814976 | 11.4271655 | 0.051976028 | 3.83824007 | 0.787152893 | YBR137W   |
| YIL143C   | 122.842614 | 113.215377 | 116.996218 | 118.84857  | 129.205622 | 117.88703  | 0.05185645  | 6.906223   | 0.541196061 | SSL2      |
| YGR093W   | 35.5770098 | 41.7291042 | 37.8285755 | 39.8527047 | 39.9410217 | 39.639998  | 0.051729746 | 5.29381745 | 0.599222523 | DRN1      |
| YCL017C   | 153.882076 | 118.107754 | 129.525043 | 139.78011  | 137.415359 | 138.804553 | 0.051718775 | 7.0912064  | 0.607651878 | NFS1      |
| YHR204W   | 154.276645 | 133.533134 | 159.727377 | 148.176377 | 156.115315 | 159.528396 | 0.051696691 | 7.24793245 | 0.575631489 | MNL1      |
| YLR143W   | 47.5456157 | 51.2260728 | 51.6889656 | 47.1255277 | 53.4936033 | 55.457261  | 0.051627504 | 5.67829426 | 0.589130473 | DPH6      |
| YER174C   | 55.8315737 | 53.1254665 | 50.5995026 | 59.956443  | 54.6664229 | 50.6152417 | 0.051487795 | 5.76179209 | 0.595853883 | GRX4      |
| YMR093W   | 170.980084 | 165.132138 | 176.735105 | 173.542564 | 170.058836 | 187.870349 | 0.051470488 | 7.44436404 | 0.55959677  | UTP15     |
| YDL132W   | 179.857896 | 173.190172 | 180.487699 | 180.638001 | 188.433009 | 183.803052 | 0.051374069 | 7.50132082 | 0.54723837  | CDC53     |
| YDR438W   | 30.5133689 | 25.4403642 | 30.3839118 | 28.1452336 | 29.4508023 | 31.8282068 | 0.051327559 | 4.87775496 | 0.661323905 | THI74     |
| YML004C   | 120.066721 | 159.951973 | 128.43558  | 146.28426  | 136.959262 | 140.676801 | 0.051303222 | 7.11860262 | 0.625136515 | GLO1      |
| YIL153W   | 80.294878  | 62.2770907 | 80.6202601 | 68.4709674 | 78.318284  | 84.448165  | 0.051274838 | 6.24471544 | 0.653205534 | RRD1      |
| YLR381W   | 63.2626312 | 54.5068437 | 65.6704071 | 55.2852803 | 64.8960157 | 69.9187586 | 0.051271794 | 5.96245799 | 0.633542483 | CTF3      |
| YAL002W   | 121.198575 | 104.927113 | 127.164539 | 123.342347 | 121.582294 | 121.050482 | 0.051259    | 6.90679002 | 0.575229171 | VPS8      |
| YDL130W   | 659.259748 | 539.485371 | 573.662782 | 676.19515  | 596.639373 | 563.481925 | 0.051243376 | 9.23259036 | 0.633971684 | RPP1B     |
| YNL136W   | 25.1209201 | 25.3252495 | 28.6891917 | 27.9678477 | 26.9748499 | 27.0507478 | 0.051184463 | 4.75389798 | 0.647599534 | EAF7      |
| YCL045C   | 453.754839 | 358.985411 | 439.356207 | 408.578916 | 426.776007 | 461.86408  | 0.051158582 | 8.73126456 | 0.631916313 | EMC1      |
| YFL060C   | 2.56470126 | 3.79878742 | 3.44996609 | 2.77904617 | 3.58361532 | 3.87361544 | 0.051131025 | 1.79413838 | 0.819510289 | SN03      |
| YKR027W   | 51.4255484 | 59.5718936 | 50.5389769 | 54.1027074 | 57.4681585 | 55.9091828 | 0.051099352 | 5.78043718 | 0.587410489 | BCH2      |
| YJL167W   | 313.353885 | 378.267135 | 300.510204 | 352.584092 | 332.038249 | 343.331448 | 0.051069793 | 8.3958372  | 0.619650435 | ERG20     |
| YBL058W   | 175.254586 | 161.966482 | 171.953573 | 190.394227 | 161.002063 | 175.991261 | 0.0510615   | 7.43368276 | 0.584951511 | SHP1      |
| YDL112W   | 212.475635 | 212.444309 | 213.232114 | 210.32058  | 226.679958 | 224.153213 | 0.050975955 | 7.75933933 | 0.557374266 | TRM3      |
| YJR124C   | 98.1820253 | 87.0267663 | 108.280515 | 99.4543759 | 103.208121 | 101.295044 | 0.050747951 | 6.63934387 | 0.588578895 | YJR124C   |
| YBL014C   | 86.1476578 | 84.436684  | 94.4806502 | 83.4896425 | 95.8454208 | 95.2909397 | 0.05066447  | 6.49282454 | 0.574871278 | RRN6      |
| YCL038C   | 53.2011108 | 45.7581212 | 49.207411  | 44.2282242 | 47.6946621 | 61.5259252 | 0.050479759 | 5.65441969 | 0.679982863 | ATG22     |
| YKL020C   | 160.063663 | 165.477482 | 160.635263 | 158.996918 | 170.971029 | 173.602532 | 0.050476632 | 7.36698932 | 0.554759657 | SPT23     |
| YER014W   | 53.7272034 | 52.2621057 | 52.2942228 | 56.0539526 | 55.9695557 | 51.8418866 | 0.050409201 | 5.74990777 | 0.567045577 | HEM14     |
| YOR129C   | 48.8608472 | 49.0964495 | 45.091662  | 48.9585156 | 50.822181  | 48.3556327 | 0.050366955 | 5.60440647 | 0.576459052 | AFI1      |
| YHR169W   | 71.4828275 | 75.2275024 | 72.8124421 | 68.8848679 | 78.3834406 | 80.1838395 | 0.050360802 | 6.22133193 | 0.568134113 | DBP8      |
| YMR258C   | 40.3118429 | 44.8947604 | 40.7943358 | 41.9222072 | 43.9807335 | 44.675698  | 0.050352854 | 5.42253928 | 0.590594464 | ROY1      |
| YKL057C   | 255.680988 | 231.55336  | 262.742154 | 232.96685  | 264.470811 | 279.158552 | 0.050263616 | 7.99170566 | 0.613194593 | NUP120    |
| YCL054W   | 172.361077 | 171.866352 | 188.900775 | 184.954392 | 188.823949 | 178.25087  | 0.050237238 | 7.49971113 | 0.569771166 | SPB1      |
| YIR036C   | 65.893094  | 55.3126471 | 54.9573545 | 63.6815474 | 58.640978  | 59.9119187 | 0.050199372 | 5.90317645 | 0.611330913 | IRC24     |
| YDL062W   | 9.4696662  | 8.05803392 | 7.08150933 | 5.79460692 | 9.05677327 | 10.6524424 | 0.050051452 | 3.07836039 | 0.835712909 | YDL062W   |
| YNL187W   | 21.9643647 | 17.3247729 | 18.2787677 | 19.6898378 | 19.5469927 | 20.2719208 | 0.049871471 | 4.29421637 | 0.717408275 | SWT21     |

|           |            |            |            |            |            |            |             |            |             |           |
|-----------|------------|------------|------------|------------|------------|------------|-------------|------------|-------------|-----------|
| YPR034W   | 87.7916971 | 77.1268961 | 92.3017242 | 98.6857035 | 84.7036349 | 82.7016896 | 0.049742257 | 6.44865759 | 0.620294752 | ARP7      |
| YBR079C   | 578.109969 | 515.714171 | 578.867994 | 575.499073 | 582.370069 | 573.359645 | 0.049680137 | 9.14830669 | 0.588777346 | RPG1      |
| YMR216C   | 169.336045 | 157.361891 | 169.774647 | 164.555011 | 169.537583 | 179.735756 | 0.049605805 | 7.39657098 | 0.570351566 | SKY1      |
| YBR279W   | 62.4077308 | 67.2845832 | 64.6414698 | 71.2500136 | 68.0886912 | 61.7841662 | 0.049556673 | 6.04535007 | 0.58101972  | PAF1      |
| YIL145C   | 96.1434166 | 85.933176  | 91.2122612 | 97.6805166 | 90.3071062 | 94.7098974 | 0.049516632 | 6.53577726 | 0.564311109 | PAN6      |
| YJL026W   | 500.314031 | 381.778136 | 456.363935 | 482.844491 | 460.071051 | 442.108642 | 0.049509005 | 8.82660881 | 0.646844681 | RNR2      |
| YGR092W   | 54.5163422 | 60.2050249 | 59.5573093 | 61.6711736 | 63.7883528 | 54.9407789 | 0.049360929 | 5.8886277  | 0.596198395 | DBF2      |
| YDR012W   | 2268.11658 | 1707.49739 | 2169.18131 | 2149.44439 | 2074.52233 | 2134.55579 | 0.049355981 | 11.0251312 | 0.660466887 | RPL4B     |
| YGL214W   | 11.639798  | 11.0510179 | 7.44466366 | 13.540459  | 8.86130335 | 8.71563473 | 0.049195114 | 3.37111898 | 0.844098795 | YGL214W   |
| YHR170W   | 244.830328 | 236.61841  | 257.173788 | 263.4181   | 259.518906 | 241.261681 | 0.049194682 | 7.96920908 | 0.585331642 | NMD3      |
| YNL048W   | 111.991955 | 107.344523 | 111.730481 | 117.843384 | 116.760703 | 107.88019  | 0.049192741 | 6.81225303 | 0.553680076 | ALG11     |
| YIL139C   | 14.6648303 | 17.3823303 | 12.7709271 | 18.5072649 | 16.1588473 | 11.6854066 | 0.049082496 | 3.93927807 | 0.79789652  | REV7      |
| YCR014C   | 29.3954222 | 29.0664795 | 28.0839344 | 32.5798817 | 30.4281519 | 26.4697055 | 0.049080729 | 4.88101873 | 0.669508803 | POL4      |
| YML094C-A | 0.26304628 | 0.69068862 | 0.66578293 | 0.47302914 | 0.26062657 | 0.96840386 | 0.049047889 | -0.5539694 | 1           | YML094C-A |
| YCR007C   | 5.45821038 | 5.4103942  | 5.68941775 | 6.14937877 | 5.40800131 | 5.55218212 | 0.048975941 | 2.52065551 | 0.808739382 | YCR007C   |
| YPR108W   | 117.187119 | 150.224775 | 122.20143  | 144.687787 | 134.613623 | 123.826573 | 0.048925954 | 7.04737794 | 0.642636414 | RPN7      |
| YDL033C   | 14.3360224 | 15.8858383 | 15.0103788 | 18.1524931 | 14.4647746 | 14.1386963 | 0.048803585 | 3.95168625 | 0.749827596 | SLM3      |
| YMR023C   | 17.5583394 | 20.0875274 | 19.1866535 | 19.2759373 | 21.1107521 | 18.4642336 | 0.048792652 | 4.27867693 | 0.703264395 | MSS1      |
| YJL050W   | 266.728931 | 265.051759 | 267.221057 | 271.28221  | 278.023393 | 277.028064 | 0.048502944 | 8.08219731 | 0.571992927 | MTR4      |
| YML018C   | 193.470541 | 151.375923 | 174.011447 | 169.580945 | 177.94279  | 188.967873 | 0.048480592 | 7.45933594 | 0.63746898  | YML018C   |
| YDR489W   | 30.3160842 | 28.7786926 | 30.989169  | 30.4512506 | 28.603766  | 34.0878158 | 0.048386168 | 4.93811594 | 0.662280273 | SLD5      |
| YGR127W   | 17.2295316 | 20.6055439 | 18.3998191 | 18.9211654 | 19.4166794 | 19.8845592 | 0.048200748 | 4.26358272 | 0.706539332 | YGR127W   |
| YPR189W   | 121.921952 | 127.029149 | 129.161888 | 125.530107 | 130.573911 | 134.930938 | 0.048171697 | 7.00352617 | 0.558130851 | SKI3      |
| YER066W   | 3.87993268 | 4.08657435 | 3.51049181 | 2.89730346 | 4.69127824 | 4.32553724 | 0.048112319 | 2.00417243 | 0.839439075 | RRT13     |
| YPR203W   | 5.85277981 | 2.99298403 | 4.72100622 | 5.26244914 | 5.21253138 | 3.48625389 | 0.048015923 | 2.23168052 | 0.882264678 | YPR203W   |
| YDR478W   | 8.8120505  | 8.69116516 | 9.38148672 | 8.92842494 | 10.2295928 | 8.65107447 | 0.047979862 | 3.20719017 | 0.770064826 | SNM1      |
| YLR190W   | 140.466715 | 128.870985 | 140.419672 | 144.392144 | 140.608034 | 138.481752 | 0.047837336 | 7.11885575 | 0.568877251 | MMR1      |
| YGR079W   | 174.465448 | 204.501389 | 189.869186 | 180.69713  | 201.659808 | 205.75354  | 0.047665098 | 7.59208665 | 0.621249733 | YGR079W   |
| YML113W   | 37.8786648 | 43.6284979 | 43.6390447 | 33.6441973 | 47.173409  | 48.678434  | 0.047579801 | 5.41111586 | 0.715869898 | DAT1      |
| YFR009W-A | 2.0386087  | 2.47496756 | 0.72630865 | 1.53734469 | 2.21532584 | 1.67856669 | 0.047568681 | 0.92614988 | 0.962856161 | YFR009W-A |
| YLR028C   | 402.855383 | 384.713562 | 377.801549 | 417.98037  | 403.058989 | 383.294247 | 0.04753949  | 8.62597511 | 0.595627262 | ADE16     |
| YGR242W   | 6.05006452 | 6.90688622 | 6.59730357 | 5.61722099 | 7.29754393 | 7.35986933 | 0.04745419  | 2.75637498 | 0.803280155 | YGR242W   |
| YBR169C   | 80.8209706 | 74.2490268 | 75.0518938 | 83.7852857 | 75.4513917 | 78.4407126 | 0.047449966 | 6.28703687 | 0.583564549 | SSE2      |
| YLR098C   | 34.787871  | 35.3977919 | 31.2917977 | 34.8267701 | 34.9891169 | 35.0562197 | 0.047432307 | 5.10909209 | 0.63817182  | CHA4      |
| YPL184C   | 249.828208 | 188.788223 | 226.547773 | 229.596517 | 228.895284 | 228.736991 | 0.04738033  | 7.81697784 | 0.65542808  | MRN1      |
| YIL112W   | 94.3678542 | 88.5232583 | 88.3070266 | 99.3952472 | 93.3043117 | 87.4145883 | 0.047297519 | 6.5237038  | 0.586371259 | HOS4      |
| YOR198C   | 352.08745  | 336.883375 | 332.891464 | 369.908784 | 347.219747 | 338.360308 | 0.046829101 | 8.43608316 | 0.601111979 | BFR1      |
| YER173W   | 34.9193941 | 38.5058907 | 36.7391125 | 39.7344474 | 38.8333588 | 35.2499005 | 0.046757758 | 5.22743302 | 0.64175877  | RAD24     |
| YPR118W   | 145.793403 | 181.248206 | 152.464291 | 173.779079 | 163.152232 | 158.430871 | 0.046687975 | 7.34538938 | 0.63742952  | MRH1      |
| YLR005W   | 49.3869397 | 56.0608931 | 53.6257886 | 54.4574793 | 56.8165921 | 53.1330917 | 0.046670729 | 5.75607231 | 0.605071527 | SSL1      |
| YNL014W   | 19.2023787 | 17.6125599 | 18.5208706 | 19.8080951 | 18.3741731 | 18.9161554 | 0.046628181 | 4.23727965 | 0.715892764 | HEF3      |
| YDR157W   | 1.90708556 | 1.72672155 | 1.39209158 | 1.06431556 | 1.43344613 | 2.71153081 | 0.046593764 | 0.86359412 | 0.916499375 | YDR157W   |
| YLR317W   | 1.70980084 | 1.32381986 | 2.66313171 | 1.30083012 | 2.15016919 | 2.45328978 | 0.046430141 | 1.0336263  | 0.922938513 | YLR317W   |
| YOR124C   | 201.493453 | 192.241666 | 187.871837 | 205.353774 | 192.712368 | 192.712368 | 0.046298507 | 7.62307316 | 0.598781832 | YBP2      |
| YPR163C   | 594.813408 | 589.90564  | 605.378259 | 689.439966 | 595.857493 | 563.030004 | 0.046257042 | 9.24445889 | 0.641801224 | TIF3      |
| YOR264W   | 54.9109117 | 58.8236476 | 61.0099266 | 56.1722099 | 59.4880144 | 64.8830585 | 0.046176131 | 5.89084257 | 0.614967136 | DSE3      |
| YDR262W   | 65.6300477 | 65.7305338 | 68.0914359 | 65.3962781 | 69.0660408 | 71.532765  | 0.046152701 | 6.08092305 | 0.584340578 | YDR262W   |
| YDR076W   | 16.3088696 | 14.2166741 | 18.4603448 | 17.2064348 | 16.3543172 | 16.9793477 | 0.046133248 | 4.06237129 | 0.746064879 | RAD55     |
| YGR196C   | 56.4234278 | 51.4563023 | 56.0468175 | 61.3755304 | 55.187676  | 52.5520494 | 0.046098282 | 5.79785388 | 0.631412708 | FV8       |
| YOR113W   | 53.1353493 | 51.2836302 | 55.3205088 | 51.7966904 | 54.4709529 | 58.6852739 | 0.046016172 | 5.76102462 | 0.613251532 | AZF1      |
| YGR183C   | 6.11582609 | 4.60459081 | 6.29467496 | 4.67116272 | 5.53831459 | 7.35986933 | 0.046002597 | 2.55309492 | 0.850096671 | QCR9      |
| YOR272W   | 114.425133 | 139.634216 | 121.838276 | 128.663925 | 127.446392 | 132.090286 | 0.045943603 | 6.99420714 | 0.616093124 | YTM1      |
| YGR249W   | 4.53754839 | 5.18016466 | 5.56836631 | 4.61203408 | 4.95190481 | 6.26234495 | 0.045901166 | 2.40818474 | 0.83940413  | MGA1      |
| YLR397C   | 101.535865 | 99.1138172 | 106.101589 | 99.3952472 | 107.573616 | 109.752437 | 0.045891651 | 6.70081103 | 0.582657189 | AFG2      |
| YJL176C   | 127.972017 | 128.755871 | 134.609203 | 141.317454 | 131.551261 | 131.057322 | 0.045837394 | 7.05173158 | 0.581967542 | SWH3      |
| YDL194W   | 41.4297896 | 37.9878742 | 40.0075014 | 42.276979  | 37.6605392 | 43.2553724 | 0.045758516 | 5.3418622  | 0.650990779 | SNF3      |
| YPL044C   | 6.83920337 | 6.90688622 | 8.65517807 | 7.45020889 | 7.03691736 | 8.65107447 | 0.045698026 | 2.94739572 | 0.807018655 | YPL044C   |
| YAL025C   | 60.3691221 | 68.3206162 | 67.7888073 | 76.8672346 | 63.4625696 | 62.4297688 | 0.045616542 | 6.05933452 | 0.656389477 | MAK16     |
| YHR122W   | 19.6627097 | 27.1670858 | 21.6076823 | 25.5435733 | 23.2609213 | 21.8859272 | 0.045436946 | 4.54461178 | 0.745852978 | CIA2      |
| YKR005C   | 12.0343675 | 8.74872254 | 9.98674393 | 9.34232544 | 11.467569  | 10.9106835 | 0.045335782 | 3.39421707 | 0.816207088 | YKR005C   |
| YKL061W   | 5.32668724 | 4.02901696 | 3.99469757 | 3.90249037 | 5.0822181  | 4.77745904 | 0.045252715 | 2.20958783 | 0.849025013 | BLI1      |
| YDR298C   | 188.932993 | 158.282809 | 182.363997 | 182.88489  | 182.308285 | 181.091522 | 0.04510585  | 7.48719735 | 0.631196023 | ATP5      |
| YJL201W   | 74.6393829 | 64.1764844 | 70.6940419 | 68.707482  | 74.669512  | 72.6948497 | 0.044890613 | 6.15048272 | 0.619633857 | ECM25     |
| YCR069W   | 154.079361 | 134.108707 | 145.443307 | 153.379697 | 147.710108 | 146.099862 | 0.04485687  | 7.19886821 | 0.6080368   | CPR4      |
| YCR041W   | 5.06364096 | 4.43191866 | 5.02363483 | 3.72510445 | 5.34284467 | 5.93954367 | 0.044852925 | 2.33016047 | 0.841311075 | YCR041W   |
| YJL102W   | 43.0738289 | 41.7866616 | 43.0943132 | 44.4056101 | 43.9155769 | 43.6427339 | 0.044829252 | 5.4409943  | 0.61868495  | MEF2      |
| YDR027W   | 76.1518991 | 84.7820283 | 80.6807858 | 82.9574847 | 85.420358  | 80.9585626 | 0.044823943 | 6.35676713 | 0.591004992 | YOX1      |
| YDL183C   | 9.14085835 | 8.86383731 | 7.2630865  | 10.0518691 | 8.53552014 | 7.42442959 | 0.044676396 | 3.11710203 | 0.813830762 | YDL183C   |
| YKL123W   | 2.76198598 | 3.33832834 | 3.38944036 | 3.01556074 | 3.58361532 | 3.22801286 | 0.0446675   | 1.74190182 | 0.865854426 | YKL123W   |
| YER064C   | 114.030564 | 116.611262 | 113.304149 | 116.306039 | 118.389619 | 120.082079 | 0.044575767 | 6.8651272  | 0.575620626 | VHR2      |
| YIL029W-A | 16.3746311 | 12.9504117 | 14.4656473 | 12.2987575 | 14.4647746 | 18.3996733 | 0.044532497 | 3.89933659 | 0.80541227  | YIL029W-A |
| YPL101W   | 69.7072651 | 76.8966665 | 68.2124873 | 78.6410939 | 71.9980897 | 70.8871625 | 0.044368522 | 6.18705626 | 0.618906568 | ELP4      |
| YLR257W   | 148.423865 | 164.901908 | 151.919559 | 169.935717 | 153.509049 | 156.300383 | 0.04424189  | 7.30045638 | 0.617299785 | YLR257W   |

|           |            |            |            |            |            |            |             |            |             |           |
|-----------|------------|------------|------------|------------|------------|------------|-------------|------------|-------------|-----------|
| YGR142W   | 24.3975428 | 24.1165444 | 22.9392482 | 27.6722045 | 24.3685842 | 21.5631259 | 0.044202044 | 4.60340722 | 0.730430499 | BTN2      |
| YML022W   | 161.904987 | 128.468084 | 152.161662 | 138.538408 | 154.030302 | 163.660252 | 0.044142975 | 7.22774685 | 0.670197037 | APT1      |
| YNL262W   | 215.960999 | 197.652061 | 218.982058 | 211.976182 | 226.745115 | 213.500771 | 0.044140626 | 7.74314383 | 0.624213364 | POL2      |
| YLR025W   | 32.1574082 | 34.073972  | 35.3470209 | 37.1919158 | 34.6633337 | 32.8611709 | 0.044026895 | 5.10919567 | 0.669378862 | SNF7      |
| YMR264W   | 90.7509678 | 73.2129939 | 83.6465461 | 93.8962835 | 82.0322126 | 79.1508754 | 0.044007774 | 6.39058685 | 0.668904832 | CUE1      |
| YOR018W   | 52.411972  | 56.1184505 | 55.8047146 | 52.1514623 | 59.553171  | 57.8459905 | 0.043976096 | 5.80134036 | 0.627545451 | ROD1      |
| YOR217W   | 160.129425 | 145.389955 | 150.587993 | 157.16393  | 156.897195 | 156.042142 | 0.043870138 | 7.27130438 | 0.600765888 | RF1       |
| YPL141W   | 31.2367462 | 26.7066267 | 30.3233861 | 32.8163963 | 30.6887785 | 27.3735491 | 0.043861089 | 4.90582863 | 0.712969788 | RFN5      |
| YPR082C   | 15.1251613 | 18.9939371 | 15.3735331 | 17.8568499 | 16.4194739 | 16.7856669 | 0.043756867 | 4.07883474 | 0.758991248 | DIB1      |
| YPL183C   | 190.971602 | 189.766699 | 190.656021 | 180.638001 | 197.945879 | 210.466439 | 0.043733132 | 7.59634034 | 0.632379661 | RTT10     |
| YNL163C   | 172.295316 | 156.786317 | 163.7826   | 160.711649 | 171.427126 | 175.862141 | 0.043699359 | 7.38300971 | 0.619309222 | RIA1      |
| YOR078W   | 32.946547  | 35.1675623 | 35.5285981 | 36.5415008 | 35.70584   | 34.6042979 | 0.043654968 | 5.13801186 | 0.655027524 | BUD21     |
| YLR382C   | 78.059846  | 77.0693387 | 77.7150255 | 83.3713852 | 77.5364043 | 79.0217549 | 0.043632129 | 6.30235198 | 0.594527227 | NAM2      |
| YPL190C   | 179.59485  | 151.66371  | 172.13515  | 174.684958 | 176.572304 | 174.684958 | 0.043627677 | 7.41334133 | 0.638595744 | NAB3      |
| YDL178W   | 111.926194 | 119.892033 | 107.675257 | 115.773881 | 115.2621   | 118.919994 | 0.043556073 | 6.8459228  | 0.599841169 | DLD2      |
| YJL135W   | 0.06576157 | 0.23022954 | 0.12105144 | 0.05912864 | 0.13031328 | 0.25824103 | 0.043554798 | -1.8973465 | 1           | YJL135W   |
| YGL040C   | 151.185851 | 130.022133 | 139.511786 | 160.829906 | 145.429626 | 127.183707 | 0.043548239 | 7.15464554 | 0.670290147 | HEM2      |
| YLR308W   | 0.26304628 | 0.46045908 | 0.54473149 | 0.41390049 | 0.65156642 | 0.25824103 | 0.043542574 | -0.8430982 | 1           | CDA2      |
| YHR165C   | 244.633044 | 236.84864  | 241.376575 | 232.49382  | 260.952352 | 251.591323 | 0.043517164 | 7.93523064 | 0.627129223 | PRP8      |
| YHR187W   | 30.2503226 | 38.2756611 | 29.052346  | 33.5852368 | 33.0995743 | 33.9586953 | 0.043333541 | 5.05201564 | 0.717226967 | IKI1      |
| YIL126W   | 262.125621 | 241.510788 | 244.342335 | 268.976193 | 256.586857 | 245.070737 | 0.043247944 | 7.98426139 | 0.633235994 | STH1      |
| YDL221W   | 7.75986536 | 6.27375498 | 8.17097231 | 6.91805112 | 7.81879707 | 8.13459242 | 0.043242872 | 2.93037504 | 0.838115089 | YDL221W   |
| YOR351C   | 7.2337728  | 5.29527943 | 5.20521199 | 4.0798763  | 6.84144744 | 7.35986933 | 0.043077617 | 2.60769977 | 0.886311136 | MEK1      |
| YJL147C   | 13.8099299 | 16.6916417 | 14.7682759 | 14.4273887 | 16.4846305 | 15.817263  | 0.043072282 | 3.95049423 | 0.759162443 | YJL147C   |
| YDL050C   | 6.57615709 | 6.33131237 | 7.68676654 | 8.39626717 | 7.36270058 | 5.42306161 | 0.043029545 | 2.82694183 | 0.846101271 | YDL050C   |
| YIL105C   | 63.6572006 | 67.6299275 | 64.0967383 | 59.7790571 | 71.7374631 | 69.9187586 | 0.042996426 | 6.04987264 | 0.644643162 | SLM1      |
| YDR356W   | 69.3126957 | 63.4857958 | 64.0362126 | 79.1732517 | 66.1339919 | 57.3295084 | 0.042991528 | 6.05987328 | 0.705009391 | SPC110    |
| YJR112W-A | 6.7734418  | 6.10108283 | 4.96310911 | 7.80498075 | 5.01706145 | 5.48762187 | 0.042928134 | 2.62224716 | 0.855258444 | YJR112W-A |
| YDR419W   | 36.4319103 | 38.4483333 | 34.9233409 | 36.3641148 | 40.3971182 | 36.4119851 | 0.042837209 | 5.2204923  | 0.667968271 | RAD30     |
| YCR023C   | 147.240157 | 117.53218  | 132.914483 | 136.587163 | 134.352996 | 138.546312 | 0.042706362 | 7.07289397 | 0.654384265 | YCR023C   |
| YGR188C   | 23.9372118 | 25.3252495 | 24.9971227 | 25.7209593 | 26.490667  | 24.1455362 | 0.042667748 | 4.65855478 | 0.70283692  | BUB1      |
| YPR086W   | 58.6593212 | 62.4497629 | 60.5862465 | 66.7562368 | 59.2925445 | 61.0740034 | 0.042667715 | 5.94496917 | 0.629716098 | SAU7      |
| YOR346W   | 92.1977224 | 92.955177  | 91.7569927 | 97.7396452 | 94.9332278 | 92.5148487 | 0.042630931 | 6.55165341 | 0.597061243 | REV1      |
| YDR299W   | 79.0454082 | 82.2495034 | 86.1281007 | 82.7209702 | 82.3579958 | 89.8033179 | 0.042468923 | 6.38959282 | 0.614292842 | BFR2      |
| YPL058C   | 495.381913 | 395.649465 | 493.526727 | 487.042624 | 477.728501 | 461.024797 | 0.042465906 | 8.87190779 | 0.684490808 | PDR12     |
| YNL285W   | 0          | 0.23022954 | 0          | 0.05912864 | 0.19546993 | 0          | 0.042424896 | -2.2761162 | 1           | YNL285W   |
| YDL240W   | 11.5740365 | 10.8783458 | 11.0762069 | 9.34232544 | 12.6403886 | 12.5892502 | 0.042407106 | 3.51804119 | 0.797716932 | DOC1      |
| YCL032W   | 18.4132398 | 20.8933308 | 18.7024477 | 19.5124519 | 20.7849689 | 19.4971977 | 0.04228     | 4.30464642 | 0.734445197 | STE50     |
| YMR027W   | 153.421745 | 175.607582 | 157.306348 | 191.635929 | 161.653629 | 147.455628 | 0.04222154  | 7.36337417 | 0.693014267 | YMR027W   |
| YNL075W   | 43.6656831 | 49.1540069 | 51.810017  | 47.4211709 | 48.8023251 | 52.8102904 | 0.042133221 | 5.61682561 | 0.66537231  | IMP4      |
| YOL073C   | 60.1718373 | 48.5208757 | 58.2257434 | 59.3060279 | 57.4030018 | 55.0053392 | 0.042080024 | 5.82146195 | 0.679536688 | DSC2      |
| YDR061W   | 59.3169369 | 65.0398452 | 65.3677785 | 65.0415062 | 67.0461849 | 63.3336124 | 0.042055418 | 6.00720782 | 0.624524511 | YDR061W   |
| YOR090W   | 122.448045 | 124.036165 | 123.04879  | 135.877619 | 122.299018 | 122.212567 | 0.042038817 | 6.96715405 | 0.619077077 | MSH2      |
| YBL066C   | 102.12272  | 101.013211 | 104.891074 | 98.5674462 | 110.570822 | 108.073871 | 0.042023262 | 6.70489294 | 0.615172485 | SEF1      |
| YML097C   | 41.6928359 | 42.2471207 | 41.7022216 | 45.0560252 | 43.8504202 | 40.414721  | 0.041970066 | 5.41351328 | 0.655413925 | VPS9      |
| YGR281W   | 443.167226 | 351.330279 | 426.040549 | 416.324768 | 428.209453 | 411.894441 | 0.041940135 | 8.68975796 | 0.683344511 | YOR1      |
| YDR316W   | 19.7284713 | 21.066003  | 16.0998417 | 23.3558136 | 18.3741731 | 16.7856669 | 0.041880253 | 4.27623595 | 0.80098258  | OMS1      |
| YNL198C   | 0.13152314 | 0.23022954 | 0.12105144 | 0.11825728 | 0.32578321 | 0.06456026 | 0.041861795 | -1.7903542 | 1           | YNL198C   |
| YJR049C   | 65.2354783 | 61.1835004 | 67.0019729 | 66.8153655 | 65.4172688 | 66.8198663 | 0.041781757 | 6.03412043 | 0.624180258 | UTR1      |
| YCR030C   | 200.770076 | 175.837812 | 205.545348 | 192.168087 | 207.63279  | 199.749436 | 0.041683839 | 7.62203336 | 0.658704637 | SYP1      |
| YNR008W   | 109.098446 | 96.8690792 | 109.1884   | 110.15666  | 109.267689 | 104.845858 | 0.04159081  | 6.73724096 | 0.62953855  | LRO1      |
| YCR033W   | 189.590609 | 173.190172 | 191.140226 | 182.234475 | 198.662602 | 189.161554 | 0.041465063 | 7.55029058 | 0.645463004 | SNT1      |
| YGL138C   | 0.32880785 | 0.46045908 | 0.42368005 | 0.41390049 | 0.39093985 | 0.4519218  | 0.041257026 | -0.8975035 | 1           | YGL138C   |
| YKR084C   | 95.8803703 | 102.337031 | 86.491255  | 99.8682764 | 98.6471564 | 94.4516564 | 0.041188846 | 6.59107431 | 0.643204529 | HBS1      |
| YGL153W   | 17.8213857 | 18.1305763 | 16.2814189 | 19.4533232 | 18.2438598 | 16.0109438 | 0.041133117 | 4.15272211 | 0.768524861 | PEX14     |
| YOR188W   | 107.58593  | 115.978131 | 125.409293 | 103.475124 | 121.582294 | 134.156215 | 0.041128886 | 6.88442801 | 0.691065041 | MSB1      |
| YGL170C   | 4.34026368 | 3.74123003 | 4.6604805  | 3.84336173 | 4.56096496 | 4.71289878 | 0.041027499 | 2.14551531 | 0.862626261 | SPO74     |
| YMR291W   | 67.274087  | 70.7955837 | 64.157264  | 68.4118388 | 68.6099443 | 71.0808432 | 0.040998685 | 6.09829478 | 0.629765715 | TA1       |
| YOL014W   | 3.41960169 | 3.39588572 | 2.84470888 | 4.31639087 | 3.25783211 | 2.32416926 | 0.040952012 | 1.76250932 | 0.913337548 | YOL014W   |
| YDR014W   | 15.1251613 | 19.0514945 | 17.6735105 | 16.674277  | 17.5271368 | 19.2389567 | 0.040922589 | 4.14404127 | 0.765695225 | RAD61     |
| YPL085W   | 215.040337 | 210.314685 | 216.379452 | 206.418089 | 228.764971 | 225.057057 | 0.040903978 | 7.76227671 | 0.644789729 | SEC16     |
| YHR131C   | 96.3407013 | 93.3580787 | 94.1174958 | 95.6110141 | 101.709519 | 94.6453371 | 0.040855787 | 6.58618177 | 0.61730083  | YHR131C   |
| YPR074C   | 1748.73169 | 1379.42029 | 1696.4149  | 1622.07604 | 1679.3473  | 1661.52278 | 0.040825646 | 10.6718537 | 0.699879502 | TKL1      |
| YEL036C   | 241.476488 | 192.356781 | 251.605421 | 232.789464 | 235.150322 | 237.065265 | 0.040790697 | 7.8570261  | 0.70237468  | ANP1      |
| YOR222W   | 40.9694586 | 39.3692514 | 39.5232957 | 40.1483479 | 40.3971182 | 42.7388903 | 0.040729836 | 5.344896   | 0.665018938 | ODC2      |
| YMR313C   | 89.5672595 | 82.4797329 | 93.3306615 | 88.8112203 | 92.7830586 | 91.352764  | 0.04070864  | 6.48921205 | 0.632235575 | TGL3      |
| YOR066W   | 177.622003 | 169.161155 | 186.358694 | 172.537377 | 179.039275 | 184.836017 | 0.040655052 | 7.49483077 | 0.650478549 | TQR1      |
| YJL182C   | 0.19728471 | 0.17267216 | 0          | 0          | 0.19546993 | 0.19368077 | 0.04061283  | -2.0122894 | 1           | YJL182C   |
| YDR138W   | 76.0203759 | 69.9897803 | 72.630865  | 78.7002225 | 72.4541862 | 73.5986933 | 0.040588162 | 6.20985887 | 0.636173959 | HPR1      |
| YDR026C   | 37.7471417 | 34.0164146 | 35.3470209 | 39.0840324 | 37.0089728 | 33.9586953 | 0.040494605 | 5.18249581 | 0.700634465 | NSI1      |
| YDR169C   | 54.5821038 | 64.3491566 | 55.1389316 | 59.0695134 | 62.28975   | 57.7814303 | 0.040484819 | 5.88267015 | 0.666754082 | STB3      |
| YLL049W   | 28.4747602 | 28.2606761 | 25.360277  | 28.4408768 | 27.691573  | 28.2773927 | 0.040471339 | 4.80079638 | 0.713044098 | LDB18     |
| YDL122W   | 248.710261 | 217.164014 | 248.579135 | 252.301915 | 234.433599 | 247.911388 | 0.040428288 | 7.91667432 | 0.66670047  | UBP1      |

|           |            |            |            |            |            |            |             |            |             |           |
|-----------|------------|------------|------------|------------|------------|------------|-------------|------------|-------------|-----------|
| YBR111W-A | 2.82774755 | 5.29527943 | 2.66313171 | 4.49377679 | 4.03971182 | 2.58241029 | 0.040419687 | 1.92526385 | 0.913750589 | SUS1      |
| YBR289W   | 67.274087  | 69.5293213 | 69.2414246 | 70.4222126 | 69.6524506 | 71.8555663 | 0.040403305 | 6.12489831 | 0.621772662 | SNF5      |
| YKL095W   | 12.0343675 | 11.3963623 | 11.3788355 | 12.2987575 | 10.6856893 | 12.7829309 | 0.040386251 | 3.57116028 | 0.79628555  | YJU2      |
| YGL094C   | 140.335192 | 125.820444 | 129.464517 | 138.656666 | 132.658924 | 135.382859 | 0.04027267  | 7.06431953 | 0.636233742 | PAN2      |
| YDR014W-A | 0.52609257 | 0.4029017  | 0.60525721 | 0.41390049 | 0.52125314 | 0.64560257 | 0.040241973 | -0.6429978 | 1           | HED1      |
| YCR067C   | 228.98179  | 193.105027 | 226.003041 | 208.487592 | 219.968824 | 237.904548 | 0.040206442 | 7.77596011 | 0.685948139 | SED4      |
| YCR059C   | 85.81885   | 67.6874849 | 79.4097457 | 81.7749119 | 81.3154895 | 76.2456638 | 0.040187532 | 6.300417   | 0.685075044 | YIH1      |
| YER096W   | 5.98430295 | 4.54703343 | 5.87099492 | 5.85373556 | 5.79894116 | 5.16482058 | 0.040160224 | 2.49908351 | 0.864242842 | SHC1      |
| YLR395C   | 7.75986536 | 7.77024699 | 7.02098361 | 9.63796865 | 7.03691736 | 6.45602573 | 0.040149528 | 2.95438479 | 0.868979492 | COX8      |
| YER038C   | 20.7806564 | 18.0154615 | 20.3971679 | 19.4533232 | 20.7849689 | 20.5947221 | 0.040114028 | 4.33024042 | 0.751638745 | KRE29     |
| YOR200W   | 21.76708   | 18.4759206 | 16.9472018 | 23.5923282 | 20.0682458 | 15.0425399 | 0.040029675 | 4.28117546 | 0.823875659 | YOR200W   |
| YAR060C   | 0.65761571 | 0.51801647 | 0.54473149 | 0.47302914 | 0.65156642 | 0.64560257 | 0.04002416  | -0.5096406 | 1           | YAR060C   |
| YHR212C   | 0.65761571 | 0.51801647 | 0.54473149 | 0.47302914 | 0.65156642 | 0.64560257 | 0.040024051 | -0.5096406 | 1           | YHR212C   |
| YOR075W   | 15.322446  | 18.7637076 | 15.615636  | 16.6151484 | 20.7198122 | 13.8158951 | 0.03989044  | 4.08227836 | 0.821125104 | UFE1      |
| YGR007W   | 71.4828275 | 79.947208  | 74.6282137 | 84.3765721 | 72.9754393 | 75.0190189 | 0.039795046 | 6.25825532 | 0.662106026 | ECT1      |
| YLL051C   | 110.808247 | 98.0777843 | 127.648745 | 92.4180675 | 117.998679 | 135.57654  | 0.039721163 | 6.83098071 | 0.761257081 | FRE6      |
| YDR130C   | 16.6376774 | 17.6701172 | 15.1919559 | 16.9107916 | 17.0710403 | 16.9147874 | 0.039658928 | 4.07534121 | 0.771124771 | FIN1      |
| YIL021W   | 64.5121201 | 69.5868786 | 64.2177898 | 69.8900549 | 64.2444493 | 69.7250778 | 0.039627778 | 6.06954817 | 0.648152618 | RPB3      |
| YML002W   | 37.3525723 | 37.815202  | 36.3759582 | 36.4823721 | 38.4424189 | 39.7691185 | 0.039619306 | 5.2412667  | 0.679153814 | YML002W   |
| YOR379C   | 0          | 0          | 0.36315432 | 0.11825728 | 0.26062657 | 0          | 0.039603481 | -2.0127573 | 1           | YOR379C   |
| YLR077W   | 64.9066704 | 67.4572554 | 67.1230244 | 68.2935815 | 68.0235345 | 68.756674  | 0.039588097 | 6.07793622 | 0.629670421 | FMP25     |
| YHL008C   | 67.2083254 | 60.2050249 | 62.3414924 | 61.8485595 | 65.6127388 | 67.5300291 | 0.039553209 | 6.00524542 | 0.655764666 | YHL008C   |
| YOL041C   | 106.599506 | 106.366048 | 108.038412 | 115.419109 | 110.179882 | 104.264815 | 0.039517995 | 6.76295855 | 0.633593873 | NOP12     |
| YER119C   | 89.5014979 | 73.8461251 | 87.3386151 | 86.2095601 | 84.1823818 | 87.0911877 | 0.039313832 | 6.40607024 | 0.673000685 | AVT6      |
| YHR095W   | 0.19728471 | 0.11511477 | 0.24210288 | 0.11825728 | 0.26062657 | 0.19368077 | 0.039272127 | -1.6904532 | 1           | YHR095W   |
| YBL011W   | 226.811658 | 194.831749 | 220.253098 | 227.2905   | 220.815861 | 211.305722 | 0.039109762 | 7.76154684 | 0.677239374 | SC11      |
| YJL010C   | 80.2291165 | 85.7605039 | 78.8650142 | 86.2095601 | 81.2503329 | 84.1220152 | 0.039009863 | 6.37277629 | 0.63809482  | NOP9      |
| YKL181W   | 376.945324 | 380.281644 | 395.89874  | 396.398416 | 398.954121 | 389.362912 | 0.038977324 | 8.60645821 | 0.6546303   | PRS1      |
| YDL232W   | 0.06576157 | 0.05755739 | 0.18157716 | 0.05912864 | 0.19546993 | 0.06456026 | 0.038968937 | -2.1381293 | 1           | OST4      |
| YPL189C-A | 1.1179467  | 0.86336078 | 1.33156586 | 1.06431556 | 1.04250628 | 1.29120515 | 0.038923056 | 0.30975214 | 0.935348796 | COA2      |
| YAL026C-A | 11.1137055 | 14.6771332 | 11.499887  | 12.062243  | 12.0539788 | 14.2678169 | 0.038867132 | 3.67195314 | 0.815072201 | YAL026C-A |
| YDR376W   | 80.6236859 | 75.918191  | 76.6860882 | 86.3278173 | 76.493898  | 76.6330254 | 0.038840473 | 6.30208441 | 0.658903665 | ARH1      |
| YDR233C   | 744.552505 | 575.746524 | 720.679758 | 625.640161 | 695.742626 | 775.110449 | 0.038744852 | 9.4297612  | 0.742354067 | RTN1      |
| YDR234W   | 203.729347 | 180.960419 | 200.461187 | 198.199208 | 198.206506 | 204.526895 | 0.038561864 | 7.62784807 | 0.669365231 | LYS4      |
| YPR190C   | 92.5922918 | 93.1278492 | 89.5780668 | 93.4232544 | 97.6698068 | 91.6755653 | 0.038550678 | 6.54120956 | 0.636027582 | RPC82     |
| YOL013W-A | 0.13152314 | 0.11511477 | 0.06052572 | 0.05912864 | 0.19546993 | 0.06456026 | 0.038451137 | -2.138076  | 1           | YOL013W-A |
| YDL066W   | 187.288954 | 187.521961 | 179.216659 | 197.371407 | 184.849394 | 186.708264 | 0.038414091 | 7.5491011  | 0.659054608 | IDP1      |
| YGR285C   | 902.97213  | 823.531067 | 892.875433 | 1013.76057 | 873.294476 | 802.806799 | 0.038379852 | 9.78954001 | 0.71591886  | ZUO1      |
| YNL233W   | 72.2062048 | 68.2055014 | 71.9045563 | 74.9159894 | 74.7998253 | 68.2401919 | 0.038297804 | 6.16658652 | 0.655771173 | BNI4      |
| YOR195W   | 49.9130323 | 47.7726297 | 49.3284624 | 52.7427487 | 49.9751446 | 48.1619519 | 0.038194978 | 5.63730746 | 0.67416329  | SLK19     |
| YKR095W   | 225.496427 | 209.508882 | 209.963725 | 222.560209 | 223.682753 | 215.954061 | 0.038178649 | 7.76803615 | 0.663878287 | MLP1      |
| YPR179C   | 38.010188  | 37.9878742 | 39.4022442 | 41.1535348 | 37.6605392 | 39.639998  | 0.038123949 | 5.28922404 | 0.691941067 | HDA3      |
| YGL193C   | 14.0729762 | 11.3963623 | 15.4340588 | 11.3526993 | 13.0964851 | 17.56039   | 0.038030535 | 3.79903112 | 0.842507451 | YGL193C   |
| YDR105C   | 99.4972567 | 81.2134704 | 98.2937706 | 96.4388151 | 92.396921  | 97.5505487 | 0.037977721 | 6.55964413 | 0.692356401 | TMS1      |
| YLR272C   | 84.2405723 | 92.7249475 | 82.4965574 | 89.4025067 | 86.4628643 | 90.5780409 | 0.037976261 | 6.45584059 | 0.654101252 | YCS4      |
| YLR166C   | 65.8273324 | 80.9256835 | 70.3914133 | 75.6255331 | 74.5391987 | 72.8885305 | 0.037947931 | 6.19979354 | 0.68348002  | SEC10     |
| YML120C   | 134.219366 | 127.604723 | 115.543601 | 130.910813 | 127.120609 | 129.314195 | 0.037925138 | 6.99515059 | 0.663441885 | NDI1      |
| YLR399C   | 206.096763 | 200.2997   | 216.863658 | 228.17743  | 205.89499  | 205.68898  | 0.037876677 | 7.71858805 | 0.677773481 | BDF1      |
| YGR028W   | 26.7649593 | 30.6780863 | 26.8128943 | 30.9242798 | 27.8218862 | 27.7609106 | 0.037810154 | 4.83788041 | 0.74071754  | MSP1      |
| YKR039W   | 40.3118429 | 34.7646606 | 39.0390899 | 39.0249037 | 39.3546119 | 38.6715941 | 0.037671358 | 5.27204648 | 0.709979649 | GAP1      |
| YOR231W   | 73.8502441 | 72.0042888 | 74.7492652 | 72.4917151 | 75.0604519 | 78.8926344 | 0.037533099 | 6.22158785 | 0.651009374 | MKK1      |
| YKL002W   | 31.2367462 | 33.325726  | 30.3839118 | 37.3101731 | 32.969261  | 27.1153081 | 0.03749807  | 5.0088637  | 0.768908362 | DID4      |
| YLR451W   | 61.4870688 | 64.1764844 | 58.2862691 | 61.7894309 | 61.5730269 | 65.4641009 | 0.037430459 | 5.96006511 | 0.664213324 | LEU3      |
| YEL027W   | 536.482895 | 442.098275 | 525.363256 | 534.286409 | 503.530531 | 505.506814 | 0.03741472  | 8.98865742 | 0.707731516 | VMA3      |
| YPR093C   | 10.7848976 | 9.49696855 | 9.92621821 | 12.1805003 | 8.99161663 | 9.74859885 | 0.037326605 | 3.36705218 | 0.848112464 | ASR1      |
| YMR019W   | 73.9817672 | 80.7530114 | 79.6518486 | 79.941924  | 82.4883091 | 78.1824715 | 0.037305461 | 6.30916985 | 0.652369789 | STB4      |
| YLR070C   | 12.1658906 | 11.799264  | 13.7393386 | 11.1753133 | 13.3571117 | 14.2032566 | 0.037263099 | 3.68401485 | 0.817768752 | XYL2      |
| YLR416C   | 0.85490042 | 0.80580339 | 0.78683437 | 1.00518691 | 0.97734963 | 0.51648206 | 0.037248024 | -0.0744073 | 1           | YLR416C   |
| YHR061C   | 62.8680617 | 52.2621057 | 61.2520294 | 58.6556129 | 59.748641  | 62.494329  | 0.03717385  | 5.89854757 | 0.701040579 | GIC1      |
| YGL195W   | 836.815989 | 724.071905 | 820.123517 | 781.621519 | 854.268737 | 806.874095 | 0.036967206 | 9.65117461 | 0.702449325 | GCN1      |
| YPR167C   | 6.97072651 | 10.3603293 | 8.53412663 | 7.62759482 | 9.64318305 | 9.3612373  | 0.036918894 | 3.15072404 | 0.842458145 | MET16     |
| YDR340W   | 0.13152314 | 0.11511477 | 0          | 0.05912864 | 0.06515664 | 0.12912051 | 0.036915164 | -2.2756525 | 1           | YDR340W   |
| YMR089C   | 196.232527 | 182.572026 | 191.140226 | 207.541533 | 192.798504 | 184.254974 | 0.036890231 | 7.58907043 | 0.684775793 | YTA12     |
| YNL179C   | 0.78913885 | 0.69068862 | 0.36315432 | 0.7095437  | 0.58640978 | 0.58104232 | 0.03687859  | -0.4277202 | 1           | YNL179C   |
| YLR409C   | 215.960999 | 215.437293 | 223.703064 | 206.83199  | 227.722465 | 237.581747 | 0.036873851 | 7.78999217 | 0.685843659 | UTP21     |
| YEL051W   | 8.15443479 | 8.57605039 | 7.92886942 | 8.69191038 | 8.73099006 | 7.87635139 | 0.036830059 | 3.07948163 | 0.835721489 | ARL3      |
| YOR049W   | 216.224045 | 237.193984 | 219.708366 | 241.717889 | 225.832922 | 222.991129 | 0.036819781 | 7.82917541 | 0.683092568 | TPA1      |
| YBL079W   | 314.734878 | 314.493552 | 320.181063 | 295.406695 | 339.20548  | 339.393272 | 0.036772083 | 8.32499547 | 0.691539009 | NUP170    |
| YOL007C   | 69.6415035 | 76.7815518 | 74.0229565 | 72.6099724 | 75.9074882 | 77.7305497 | 0.036695409 | 6.22062652 | 0.662547718 | CSI2      |
| YPR173C   | 120.212152 | 118.568213 | 124.682985 | 131.029071 | 121.321668 | 120.40488  | 0.036681439 | 6.94053745 | 0.660441562 | VPS4      |
| YDR278C   | 0.06576157 | 0.11511477 | 0          | 0.05912864 | 0.06515664 | 0.06456026 | 0.036656612 | -2.4278476 | 1           | YDR278C   |
| YAL069W   | 0.06576157 | 0          | 0.12105144 | 0          | 0.06515664 | 0.12912051 | 0.036432932 | -2.427489  | 1           | YAL069W   |
| YBR051W   | 0.85490042 | 0.46045908 | 0.84736009 | 0.7095437  | 0.78187971 | 0.71016283 | 0.036424076 | -0.2393618 | 1           | YBR051W   |

|           |            |            |            |            |            |            |             |            |              |           |
|-----------|------------|------------|------------|------------|------------|------------|-------------|------------|--------------|-----------|
| YNL091W   | 214.580006 | 198.860766 | 208.63216  | 211.030123 | 213.778943 | 213.113409 | 0.036407994 | 7.71503381 | 0.675748524  | NST1      |
| YGR198W   | 105.021229 | 118.913558 | 105.859486 | 111.871391 | 114.48022  | 111.947486 | 0.036286474 | 6.80063797 | 0.669595455  | YPP1      |
| YCR050C   | 4.40602525 | 2.99298403 | 3.44996609 | 3.25207531 | 3.64877197 | 4.19641672 | 0.036243621 | 1.91299984 | 0.913266894  | YCR050C   |
| YBR014C   | 25.3182048 | 34.7646606 | 26.3892143 | 31.9885953 | 27.8218862 | 28.9229953 | 0.036199133 | 4.87540298 | 0.786888139  | GRX7      |
| YML116W   | 57.6071361 | 54.7370733 | 61.130978  | 52.9201346 | 59.1622312 | 65.8514624 | 0.036098611 | 5.87473027 | 0.717433722  | ATR1      |
| YJL054W   | 105.678844 | 113.906065 | 111.851532 | 111.575747 | 113.437714 | 114.852698 | 0.035863515 | 6.80749616 | 0.658505505  | TIM54     |
| YNL323W   | 72.1404432 | 72.1194036 | 68.5151159 | 78.8776084 | 70.1737037 | 68.9503548 | 0.035640678 | 6.16847005 | 0.6891934    | LEM3      |
| YJR042W   | 118.173543 | 129.21633  | 112.154161 | 132.389029 | 122.038391 | 114.077795 | 0.035588658 | 6.92456041 | 0.699679745  | NUP85     |
| YML009C-A | 13.3495989 | 11.4539196 | 11.4393612 | 11.7665998 | 11.7933522 | 13.557654  | 0.03553435  | 3.62502438 | 0.831323288  | YML009C-A |
| YPR084W   | 57.7386592 | 50.8807285 | 58.5888977 | 54.1027074 | 56.6862788 | 60.5575213 | 0.035500484 | 5.82107371 | 0.709247148  | YPR084W   |
| YOR180C   | 14.2044993 | 13.4108707 | 14.4051215 | 14.9004178 | 12.5100753 | 15.6235823 | 0.035498316 | 3.8379449  | 0.813223728  | DCI1      |
| YBR008C   | 46.6907153 | 36.8367265 | 48.783731  | 44.3464815 | 44.5671433 | 46.6125057 | 0.035497408 | 5.48370276 | 0.757378422  | FLR1      |
| YHR166C   | 23.1480729 | 26.8792989 | 21.8497852 | 25.3070588 | 25.8020303 | 22.59609   | 0.035460264 | 4.60865195 | 0.777641883  | CDC23     |
| YKR067W   | 91.9346761 | 70.6229116 | 79.8939514 | 85.8547882 | 86.2022377 | 76.2456638 | 0.035385563 | 6.35575162 | 0.737781066  | GP2       |
| YDR141C   | 160.32671  | 160.067088 | 167.656247 | 165.737584 | 174.294018 | 160.109438 | 0.035256361 | 7.36475182 | 0.680838884  | DOP1      |
| YGR005C   | 45.1781992 | 45.0098752 | 46.9679593 | 51.855819  | 45.5444929 | 43.0616916 | 0.035237048 | 5.53616786 | 0.726264125  | TFG2      |
| Q0275     | 0.06576157 | 0.05755739 | 0.24210288 | 0.23651457 | 0.06515664 | 0.06456026 | 0.035094232 | -2.0130768 | 1            | COX3      |
| YKL048C   | 32.2231697 | 41.1535304 | 37.0417411 | 41.3900494 | 35.5755267 | 36.2183043 | 0.035055888 | 5.22562166 | 0.762011207  | ELM1      |
| YNL209W   | 4437.65656 | 3439.68689 | 4190.86143 | 4276.4199  | 4077.7633  | 4010.67686 | 0.035051414 | 11.9916222 | 0.746125259  | SSB2      |
| YBR119W   | 10.7848976 | 14.6195758 | 13.7998643 | 12.890044  | 13.291955  | 14.0741361 | 0.035043643 | 3.742019   | 0.826894718  | MUD1      |
| YFL032W   | 0.13152314 | 0.11511477 | 0.06052572 | 0.17738593 | 0          | 0.12912051 | 0.034965277 | -2.1384497 | 1            | YFL032W   |
| YDR291W   | 68.65508   | 71.140928  | 69.9677332 | 69.0622539 | 76.7545246 | 69.1440355 | 0.034804256 | 6.1478828  | 0.68422181   | HRQ1      |
| YDR052C   | 77.2698458 | 81.155913  | 79.1071171 | 82.9574847 | 80.0123567 | 80.3775203 | 0.034793826 | 6.32689293 | 0.667978198  | DBF4      |
| YHL014C   | 24.5290659 | 24.8647904 | 26.5707914 | 26.2531171 | 26.4535968 | 25.1139401 | 0.034694215 | 4.68685866 | 0.755404481  | YLF2      |
| YMR199W   | 116.79255  | 131.173281 | 117.117127 | 111.753133 | 124.449187 | 137.90071  | 0.034624166 | 6.94623633 | 0.719486389  | CLN1      |
| YDR162W   | 597.443871 | 582.998754 | 632.433257 | 645.743899 | 618.336535 | 592.663162 | 0.034530584 | 9.25675073 | 0.705845353  | TIF4631   |
| YDL103C   | 70.8252118 | 81.0983557 | 79.6518486 | 82.0705551 | 78.4485973 | 76.6975856 | 0.034292098 | 6.29038485 | 0.694079809  | QR1       |
| YGL142C   | 104.429375 | 92.5522753 | 100.351645 | 95.965786  | 105.162821 | 103.296412 | 0.03415577  | 6.6496192  | 0.694170948  | GPI10     |
| YPL012W   | 392.596578 | 340.451933 | 384.15675  | 371.682644 | 382.66496  | 389.556592 | 0.034154898 | 8.55826853 | 0.714117937  | RRP12     |
| YDR440W   | 30.3818457 | 37.2971856 | 35.9522782 | 36.659758  | 35.0542735 | 34.4751774 | 0.034043234 | 5.13385659 | 0.751956406  | DOT1      |
| YDR070C   | 0.78913885 | 1.03603293 | 1.08946297 | 1.53734469 | 0.58640978 | 0.83928334 | 0.033783871 | 0.15532607 | 1            | FMP16     |
| YJL069C   | 112.781094 | 126.453575 | 120.143556 | 115.586121 | 122.820271 | 131.638365 | 0.033771288 | 6.92316104 | 0.704883858  | UTP18     |
| YDR101C   | 245.553706 | 258.20243  | 265.465811 | 239.352743 | 260.300786 | 287.809627 | 0.033614194 | 8.01995335 | 0.72766641   | ARX1      |
| YDL131W   | 177.556241 | 190.169601 | 169.895698 | 196.070577 | 173.903078 | 180.252238 | 0.033505502 | 7.50337658 | 0.716460033  | LYS21     |
| YJL129C   | 244.764567 | 204.904291 | 246.158106 | 240.239672 | 245.119288 | 226.671063 | 0.033411704 | 7.87500358 | 0.73555574   | TRK1      |
| YCL005W   | 43.4683983 | 41.095973  | 48.2995252 | 42.0404645 | 46.6521559 | 47.3226686 | 0.033380576 | 5.48949179 | 0.740418768  | LDB16     |
| YOR233W   | 91.0140141 | 100.840539 | 91.3333127 | 93.0684825 | 98.907783  | 97.9379103 | 0.033266857 | 6.57958809 | 0.693489047  | KIN4      |
| YDR192C   | 38.8650884 | 39.3116941 | 39.2206671 | 37.3101731 | 41.5047811 | 41.3831249 | 0.033176738 | 5.31164597 | 0.729204832  | NUP42     |
| YBR001C   | 66.8795176 | 67.3421406 | 62.644121  | 71.6639141 | 63.3322563 | 66.3679445 | 0.033139712 | 6.05531965 | 0.711231282  | NTH2      |
| YDL030W   | 25.7127742 | 22.7351671 | 26.87342   | 25.7800879 | 26.1929702 | 25.0493798 | 0.033078544 | 4.67283511 | 0.781624923  | PRP9      |
| YDR159W   | 104.100567 | 109.474147 | 107.554206 | 100.104791 | 114.936317 | 113.626053 | 0.032887948 | 6.76043759 | 0.703176187  | SAC3      |
| YDR405W   | 32.3546929 | 34.3617589 | 33.5312493 | 37.0736585 | 33.8162973 | 31.6345261 | 0.032781716 | 5.08451504 | 0.759863482  | MRP20     |
| YEL055C   | 267.91264  | 267.123824 | 261.95532  | 292.923293 | 267.40286  | 254.883896 | 0.032741879 | 8.07055783 | 0.721634749  | POL5      |
| YOR329C   | 98.0505022 | 110.913081 | 99.4437593 | 90.7624655 | 109.007063 | 115.885662 | 0.032728574 | 6.70220272 | 0.745235134  | SCD5      |
| YBL080C   | 22.9507882 | 23.4258558 | 21.8497852 | 23.2375563 | 21.7623185 | 24.7911388 | 0.032670657 | 4.53151149 | 0.784370123  | PET112    |
| YGL119W   | 49.1238934 | 52.1469909 | 46.7258565 | 51.5601758 | 52.3207837 | 47.5163493 | 0.032610435 | 5.64463834 | 0.726832644  | COQ8      |
| YGL163C   | 81.6101094 | 73.2129939 | 76.6860882 | 83.3713852 | 79.1001637 | 74.1797356 | 0.032558347 | 6.28811726 | 0.714301442  | RAD54     |
| YOR070C   | 47.6771389 | 47.9453018 | 46.8469079 | 50.9097608 | 48.2810719 | 46.4833852 | 0.032543809 | 5.58951889 | 0.72024398   | GYP1      |
| YJR133W   | 39.2596578 | 46.1610229 | 39.7653986 | 47.7168141 | 42.5472874 | 37.7677505 | 0.032430827 | 5.40423772 | 0.775086907  | XPT1      |
| YHR207C   | 39.2596578 | 42.2471207 | 40.5522329 | 46.4751126 | 43.9155769 | 34.4106171 | 0.032410858 | 5.36745185 | 0.78539016   | SET5      |
| YNL268W   | 338.474805 | 283.585237 | 337.975625 | 301.437817 | 327.542441 | 352.757246 | 0.03229217  | 8.33864517 | 0.754012557  | LYP1      |
| YLR195C   | 90.2906368 | 108.95613  | 99.927965  | 101.228235 | 104.641567 | 100.197519 | 0.032169467 | 6.65835729 | 0.718936519  | NMT1      |
| YHR073W   | 201.164645 | 196.328241 | 203.66905  | 201.510412 | 206.742026 | 206.463703 | 0.032159635 | 7.66366827 | 0.707473484  | OSH3      |
| YDR519W   | 40.9036971 | 32.3472504 | 45.7574449 | 40.4439911 | 37.7256959 | 43.4490531 | 0.032104564 | 5.32967702 | 0.80358528   | FPR2      |
| YMR075C-A | 3.48536326 | 2.64763972 | 2.78418316 | 3.54771852 | 2.80173562 | 2.71153081 | 0.032068769 | 1.64097693 | 0.931941311  | YMR075C-A |
| YLR133W   | 50.7021711 | 48.0604166 | 50.0547711 | 51.5010472 | 49.6493614 | 50.938043  | 0.03190845  | 5.65168061 | 0.720447844  | CKI1      |
| YMR115W   | 36.2346255 | 38.7936776 | 35.4680724 | 37.3693018 | 39.8758651 | 35.7663825 | 0.031858325 | 5.22408175 | 0.748803329  | MGR3      |
| YPR081C   | 37.4183338 | 32.8077095 | 38.0101527 | 40.0300906 | 35.4452134 | 35.0562197 | 0.031853341 | 5.19317565 | 0.773965984  | GRS2      |
| YMR129W   | 249.893969 | 231.841147 | 259.715868 | 237.815398 | 260.105316 | 260.048716 | 0.031759472 | 7.96586644 | 0.730645094  | POM152    |
| YPR098C   | 49.649986  | 37.6425299 | 42.3074788 | 39.4979329 | 44.0458902 | 48.8721147 | 0.031671339 | 5.45158529 | 0.795426527  | YPR098C   |
| YKL151C   | 46.427669  | 44.088957  | 44.3653533 | 45.056022  | 43.6549503 | 49.1303558 | 0.031572685 | 5.51005532 | 0.737722784  | YKL151C   |
| YER008C   | 239.832449 | 185.33478  | 216.863658 | 214.63697  | 220.946174 | 220.473279 | 0.031450912 | 7.75787449 | 0.760954701  | SEC3      |
| YNL098C   | 144.149363 | 148.382939 | 142.356495 | 151.605838 | 145.299312 | 147.520188 | 0.031318043 | 7.19652748 | 0.701643786  | RAS2      |
| YDR333C   | 117.187119 | 131.173281 | 120.264607 | 124.406663 | 128.944995 | 123.439212 | 0.031217335 | 6.95844964 | 0.710849431  | RQC1      |
| YOR157C   | 135.140028 | 142.6272   | 136.364449 | 149.891107 | 139.435214 | 133.833413 | 0.031199527 | 7.12600745 | 0.715433036  | PUP1      |
| YIL065C   | 15.6512539 | 17.785232  | 13.7998643 | 18.2707504 | 16.5497871 | 13.4285335 | 0.031081884 | 4.00482606 | 0.85856046   | FIS1      |
| YOR310C   | 567.851164 | 569.587883 | 551.449842 | 607.546797 | 572.270789 | 545.792415 | 0.031076905 | 9.15282243 | 0.7311758301 | NOP58     |
| YML116W-A | 10.7848976 | 9.89987024 | 10.1683211 | 11.234442  | 10.6656893 | 9.55491807 | 0.030847813 | 3.39389705 | 0.849647726  | YML116W-A |
| YMR043W   | 66.7479944 | 69.5293213 | 70.2098361 | 61.6711736 | 72.1935596 | 77.2140677 | 0.030821536 | 6.12324274 | 0.748285497  | MCM1      |
| YHL024W   | 41.5613128 | 33.4983982 | 37.4654212 | 39.2022897 | 36.8135029 | 38.8007146 | 0.030728592 | 5.24795462 | 0.78272996   | RIM4      |
| YDR284C   | 94.4993773 | 80.2349949 | 93.1490843 | 92.3589388 | 92.7830586 | 88.3829922 | 0.030690627 | 6.49740656 | 0.736263232  | DPP1      |
| YPL105C   | 294.019983 | 258.317545 | 290.402408 | 285.473084 | 292.292697 | 282.903047 | 0.030496744 | 8.14981616 | 0.740056308  | SYH1      |
| YJR010C-A | 7.43105751 | 8.05803392 | 8.59465235 | 9.40145408 | 7.29754393 | 7.87635139 | 0.03046833  | 3.04381099 | 0.862097058  | SPC1      |

|           |            |            |            |            |            |            |             |             |             |         |
|-----------|------------|------------|------------|------------|------------|------------|-------------|-------------|-------------|---------|
| YOR033C   | 56.0288584 | 49.4417938 | 51.3258112 | 56.3495958 | 53.36329   | 50.2924404 | 0.030464048 | 5.72571866  | 0.752480459 | EXO1    |
| YLR219W   | 110.93977  | 93.0702918 | 105.556857 | 102.233422 | 107.573616 | 106.266183 | 0.030427621 | 6.705694    | 0.73593023  | MSC3    |
| YIL073C   | 30.5133689 | 26.2461676 | 32.6838892 | 27.8495904 | 32.1873813 | 31.3117248 | 0.030387883 | 4.91832022  | 0.80105243  | SPO22   |
| YJR105W   | 831.160494 | 663.694208 | 784.897547 | 801.133971 | 779.534068 | 747.349538 | 0.030310264 | 9.58509395  | 0.769381017 | ADO1    |
| YHR120W   | 58.6593212 | 59.1114345 | 61.6757095 | 59.7199284 | 63.9186661 | 59.6536777 | 0.030259675 | 5.92071566  | 0.724035057 | MSH1    |
| YFR021W   | 61.4213072 | 51.5138597 | 60.2230922 | 57.8278119 | 58.7712913 | 60.1055995 | 0.029989613 | 5.86837832  | 0.755065814 | ATG18   |
| YPR147C   | 52.2804488 | 50.1324825 | 60.3441436 | 51.5010472 | 56.4256522 | 58.2979123 | 0.029971739 | 5.77991999  | 0.764407642 | YPR147C |
| YGR178C   | 246.671652 | 227.063884 | 253.058039 | 245.502122 | 240.949263 | 255.529498 | 0.029923414 | 7.93612145  | 0.740387048 | PBP1    |
| YPR076W   | 12.6919832 | 13.2381986 | 11.1367326 | 12.1805003 | 12.4449187 | 13.2348527 | 0.029864463 | 3.65646399  | 0.855170741 | YPR076W |
| YPL106C   | 1982.90865 | 1685.16512 | 1862.43695 | 1913.93501 | 1912.93386 | 1819.17893 | 0.029856694 | 10.8633115  | 0.758343013 | SSE1    |
| YGR274C   | 87.2656045 | 84.2064545 | 91.4543641 | 89.9937931 | 86.5280209 | 91.8692461 | 0.029839646 | 6.47045527  | 0.720224883 | TAF1    |
| YLR135W   | 21.1094642 | 18.0154615 | 19.5498078 | 21.3454398 | 19.2212095 | 19.2389567 | 0.029809532 | 4.31225445  | 0.828353556 | SLX4    |
| YLR115W   | 70.7594503 | 64.7520583 | 71.6019277 | 67.9388097 | 73.1057526 | 70.3706804 | 0.029789386 | 6.12655145  | 0.732477871 | CFT2    |
| YNL203C   | 7.2337728  | 5.58306636 | 7.14203505 | 5.97199284 | 6.3201943  | 8.07003216 | 0.02972569  | 2.77156318  | 0.89001294  | YNL203C |
| YPR010C   | 737.055686 | 659.319847 | 756.208356 | 687.370463 | 752.885001 | 756.904456 | 0.029574087 | 9.50196577  | 0.75957104  | RPA135  |
| YNL102W   | 137.902014 | 129.734346 | 136.969706 | 135.700233 | 144.843216 | 132.413088 | 0.029558718 | 7.09145164  | 0.726120176 | POL1    |
| YFR008W   | 4.93211781 | 6.90688622 | 4.53942906 | 5.79460692 | 5.21253138 | 5.7458629  | 0.029521086 | 2.50048567  | 0.895553064 | FAR7    |
| YBR236C   | 46.2961459 | 50.1900398 | 41.2180159 | 52.861006  | 43.9807335 | 43.6427339 | 0.029425956 | 5.53932557  | 0.794511799 | ABD1    |
| YHR205W   | 198.994513 | 172.78727  | 196.46649  | 176.79464  | 202.115904 | 200.976081 | 0.029264732 | 7.58088434  | 0.764282013 | SCH9    |
| YPR088C   | 220.301262 | 219.869211 | 224.974104 | 221.495893 | 225.572296 | 231.706763 | 0.029215741 | 7.80804552  | 0.734495042 | SRP54   |
| YDR416W   | 52.7407798 | 54.1614994 | 55.2599831 | 57.5912973 | 54.6664229 | 53.197652  | 0.029182285 | 5.77433604  | 0.741153943 | SYF1    |
| YCL016C   | 17.4925779 | 20.8933308 | 13.3761843 | 17.6203353 | 17.6574501 | 17.56039   | 0.028825445 | 4.13461165  | 0.864484022 | DCC1    |
| YMR187C   | 18.2159551 | 19.3968388 | 20.9418994 | 17.9159785 | 21.0455955 | 20.8529631 | 0.028812477 | 4.31086908  | 0.824970881 | YMR187C |
| YJR156C   | 3.74840954 | 3.05054141 | 3.2078632  | 3.31120395 | 3.32298876 | 3.55081415 | 0.02878746  | 1.80013522  | 0.933762323 | THI1    |
| YFR003C   | 15.782777  | 14.044002  | 16.0998417 | 18.8029082 | 14.464774  | 13.4930938 | 0.02869543  | 0.836179161 | 0.793274988 | YPI1    |
| YNL085W   | 439.353055 | 418.096846 | 437.843064 | 437.191719 | 438.960299 | 445.078414 | 0.028639355 | 8.76886678  | 0.743612362 | MKT1    |
| YBR280C   | 29.72423   | 28.7786926 | 27.7813058 | 29.8599642 | 28.9947058 | 29.116676  | 0.028546914 | 4.86614784  | 0.788960555 | SAF1    |
| YFR013W   | 89.2384517 | 95.948161  | 83.464969  | 89.6981499 | 90.1116362 | 94.2579756 | 0.028467867 | 6.50110171  | 0.74125109  | IOC3    |
| YNL231C   | 101.009773 | 129.619231 | 106.525269 | 132.329901 | 110.831448 | 100.714001 | 0.028412815 | 6.8286344   | 0.808950637 | PDR16   |
| YML048W   | 386.546514 | 315.126684 | 350.383398 | 348.977245 | 361.619365 | 362.183043 | 0.028281771 | 8.46859226  | 0.772613203 | GSF2    |
| YNL097C   | 18.8078093 | 20.8357734 | 21.1840023 | 18.8620368 | 20.589499  | 22.6606503 | 0.028164266 | 4.36545332  | 0.823912919 | PHO23   |
| YBR103W   | 29.0666143 | 31.5414471 | 30.3839118 | 30.5695079 | 31.9267547 | 30.3433209 | 0.028087159 | 4.94325561  | 0.784527207 | SIF2    |
| YPL272C   | 26.9622441 | 26.1310529 | 24.8155455 | 27.4948185 | 27.5612597 | 24.339217  | 0.028017601 | 4.71921967  | 0.81110354  | PBI1    |
| YMR037C   | 119.554536 | 117.417066 | 120.567236 | 110.866204 | 127.902489 | 125.827941 | 0.027871425 | 6.91249973  | 0.74820191  | MSN2    |
| YGL113W   | 32.5519776 | 33.0954965 | 35.9522782 | 33.5850687 | 33.0995743 | 36.9284672 | 0.027822156 | 5.10119937  | 0.790403686 | SLD3    |
| YGL085W   | 15.9143001 | 22.6776097 | 18.5813963 | 19.2168087 | 19.1560528 | 20.0136798 | 0.027807593 | 4.27823511  | 0.849243911 | LCL3    |
| YPL042C   | 52.1489257 | 54.5644011 | 56.7731261 | 53.6296783 | 56.7514354 | 56.3611046 | 0.027751422 | 5.78558895  | 0.750995122 | SN3     |
| YGR255C   | 138.822676 | 122.367001 | 129.585568 | 132.862059 | 131.551261 | 133.833413 | 0.027708889 | 7.04019593  | 0.745418355 | COQ6    |
| YOL142W   | 55.4370042 | 56.1184505 | 55.3205088 | 59.7790571 | 58.5758214 | 51.7127661 | 0.02766433  | 5.81471064  | 0.765451494 | RRP40   |
| YFR048W   | 59.4484601 | 72.0042888 | 57.0757547 | 63.090261  | 65.5475821 | 63.6564137 | 0.027653336 | 5.99106596  | 0.781020253 | RMD8    |
| YDL212W   | 200.770076 | 181.248206 | 209.661097 | 203.166014 | 196.642746 | 203.23569  | 0.027612245 | 7.63835072  | 0.7641973   | SHR3    |
| YER089C   | 183.014452 | 162.484498 | 185.087654 | 190.453356 | 176.574501 | 173.667092 | 0.027553448 | 7.48113638  | 0.767775656 | PTC2    |
| YDR477W   | 150.988567 | 143.375446 | 150.164313 | 160.416006 | 146.602445 | 145.970742 | 0.027543453 | 7.22605078  | 0.748051748 | SNF1    |
| YPL183W-A | 10.5218513 | 8.9213947  | 8.65517807 | 8.33713852 | 10.0992796 | 10.2005206 | 0.027530809 | 3.25730902  | 0.893964607 | RTC6    |
| YAL022C   | 140.598239 | 115.690344 | 129.70662  | 124.997949 | 129.726875 | 138.610872 | 0.027500218 | 7.02226749  | 0.771189439 | FUN26   |
| YGL135W   | 1772.53738 | 1548.86923 | 1812.07955 | 1865.86343 | 1582.98062 | 1783.21887 | 0.027473402 | 10.7546482  | 0.791219313 | RPL1B   |
| YDL056W   | 72.4034895 | 69.0688622 | 69.5440532 | 69.2396398 | 76.1029582 | 69.7250778 | 0.02741633  | 6.15236261  | 0.749202517 | MBP1    |
| YNL273W   | 83.3199103 | 86.681422  | 83.888649  | 88.8703489 | 87.1795873 | 82.7016896 | 0.027365905 | 6.41902066  | 0.738827221 | TOF1    |
| YMR054W   | 234.966093 | 197.479388 | 232.37191  | 221.909793 | 226.419332 | 218.930672 | 0.027224317 | 7.80584119  | 0.776896952 | STV1    |
| YIR015W   | 9.9299972  | 10.3027719 | 10.5920011 | 9.2831968  | 10.2947495 | 11.8790873 | 0.027212895 | 3.3920863   | 0.869670834 | RPR2    |
| YOR251C   | 85.8846116 | 84.8971431 | 85.3412663 | 97.3848734 | 86.5280209 | 76.9558267 | 0.027087762 | 6.43129086  | 0.780085908 | TUM1    |
| YNL236W   | 87.8574587 | 95.4877019 | 92.0596213 | 85.0269872 | 98.5819997 | 97.1631872 | 0.027047727 | 6.53629145  | 0.760053591 | SIN4    |
| YGL049C   | 115.016987 | 105.2149   | 114.393612 | 117.725126 | 112.004268 | 111.108203 | 0.026999288 | 6.81631474  | 0.749413326 | TIF4632 |
| YHR077C   | 123.8948   | 125.762887 | 131.461866 | 135.936748 | 131.551261 | 120.792241 | 0.026969743 | 7.00409109  | 0.753614573 | NMD2    |
| YML064C   | 18.2817167 | 20.1450848 | 16.7656247 | 17.6203353 | 20.5243423 | 18.1414323 | 0.026851836 | 4.22511193  | 0.846412487 | TEM1    |
| YOR016C   | 77.3356073 | 62.1044186 | 69.9072075 | 79.4688949 | 67.2416548 | 66.3679445 | 0.026850421 | 6.14003171  | 0.80544356  | ERP4    |
| YGL096W   | 6.7734418  | 7.13711576 | 7.80781798 | 6.3267647  | 9.64318305 | 6.1977847  | 0.026768373 | 2.89352132  | 0.904366354 | TOS8    |
| YCL061C   | 69.6415035 | 60.3201396 | 68.5756417 | 67.05188   | 69.1963541 | 65.9160227 | 0.026747426 | 6.06384225  | 0.770076239 | MRC1    |
| YDL003W   | 71.877397  | 70.5653542 | 74.144008  | 77.8724215 | 70.7601135 | 71.9201266 | 0.026681724 | 6.18953507  | 0.755989326 | MCD1    |
| YPR091C   | 148.884196 | 130.482592 | 138.785478 | 141.553969 | 142.953673 | 141.322403 | 0.026594861 | 7.13725204  | 0.758692417 | NVJ2    |
| YDR137W   | 36.8922413 | 43.0529241 | 38.9785642 | 39.2022897 | 41.700251  | 40.3501608 | 0.026591702 | 5.32768806  | 0.787543504 | RGP1    |
| YOR341W   | 683.460006 | 648.383944 | 683.335388 | 651.006349 | 721.414343 | 679.948629 | 0.026370481 | 9.40522084  | 0.773435931 | RPA190  |
| YKL184W   | 191.629218 | 153.908448 | 187.085003 | 172.182606 | 179.962646 | 190.194518 | 0.026287276 | 7.4859248   | 0.797247475 | SPE1    |
| YJL070C   | 35.1824404 | 37.9303168 | 34.0154551 | 39.143161  | 35.7709966 | 34.1523761 | 0.026148334 | 5.17662358  | 0.804224616 | YJL070C |
| YML072C   | 965.248337 | 796.018637 | 922.169882 | 870.787511 | 934.085623 | 927.472656 | 0.026094481 | 9.81815463  | 0.794907957 | TCB3    |
| YDR248C   | 9.00933521 | 8.80627993 | 7.38413794 | 9.2831968  | 7.49301386 | 8.84475525 | 0.026035545 | 3.10385306  | 0.900037955 | YDR248C |
| YIL010W   | 33.9329706 | 39.0814645 | 31.2312719 | 33.3485541 | 34.3375505 | 38.5424736 | 0.025984632 | 5.13772634  | 0.819666103 | DOT5    |
| YDR327W   | 37.089526  | 38.9663497 | 31.5339005 | 43.2230373 | 36.7483462 | 29.5040376 | 0.025969893 | 5.18267353  | 0.8557592   | YDR327W |
| YOR122C   | 252.392909 | 227.063884 | 240.287112 | 250.173284 | 236.062515 | 246.426502 | 0.025866568 | 7.91996587  | 0.774023219 | PFY1    |
| YJL031C   | 18.4132398 | 24.3467739 | 21.6076823 | 27.4948185 | 20.7198122 | 17.3021489 | 0.025823954 | 4.44695079  | 0.884666007 | BET4    |
| YHR129C   | 17.6898626 | 18.9363797 | 17.0077275 | 20.6358961 | 17.7226067 | 16.2046246 | 0.02578992  | 4.18353082  | 0.864628135 | ARP1    |
| YER175C   | 23.6741655 | 22.6200524 | 22.757671  | 25.6618306 | 22.4790416 | 22.079608  | 0.02578616  | 4.5447844   | 0.838535066 | TMT1    |
| YKL185W   | 207.806564 | 214.113473 | 224.913578 | 191.931572 | 225.116199 | 241.519922 | 0.025676156 | 7.76605756  | 0.799165809 | ASH1    |

|           |            |            |            |            |            |            |             |            |             |           |
|-----------|------------|------------|------------|------------|------------|------------|-------------|------------|-------------|-----------|
| YDL217C   | 19.7284713 | 21.8718064 | 18.9445506 | 20.1628669 | 21.4365353 | 20.07824   | 0.02559353  | 4.35735491 | 0.837033844 | TIM22     |
| YIL109C   | 682.539344 | 564.062374 | 686.180097 | 616.179578 | 670.787632 | 680.335991 | 0.025573831 | 9.34455272 | 0.804706031 | SEC24     |
| YGR231C   | 105.48156  | 118.740886 | 107.312103 | 113.940893 | 107.11752  | 116.466704 | 0.025536916 | 6.80276013 | 0.767515199 | PHB2      |
| YLR405W   | 40.2460814 | 43.3982684 | 40.2496043 | 40.6805057 | 44.1762035 | 41.3185646 | 0.025420964 | 5.38552034 | 0.788836062 | DUS4      |
| YNL087W   | 422.057762 | 352.19364  | 428.945783 | 389.657751 | 413.744678 | 420.997438 | 0.025265248 | 8.66072341 | 0.801766283 | TCB2      |
| YMR275C   | 118.370828 | 113.272934 | 118.690938 | 119.7355   | 118.194149 | 118.532632 | 0.025198448 | 6.88166769 | 0.755183207 | BUL1      |
| YDR514C   | 25.9758205 | 26.5339546 | 27.0549972 | 28.8547773 | 25.6065604 | 26.4697055 | 0.025196548 | 4.74851181 | 0.825561068 | YDR514C   |
| YAL056C-A | 5.39244881 | 7.65513222 | 6.05257208 | 6.3267647  | 7.23238729 | 5.93954367 | 0.025196346 | 2.71540747 | 0.90383285  | YAL056C-A |
| YDR307W   | 105.021229 | 91.9191441 | 110.762069 | 102.351679 | 103.208121 | 107.492828 | 0.025139783 | 6.69448763 | 0.783684334 | PMT7      |
| YPL180W   | 58.2647518 | 49.614466  | 54.0494687 | 52.0923336 | 61.5730269 | 51.0671635 | 0.025125567 | 5.76945731 | 0.812522264 | TCO89     |
| YPL204W   | 139.677577 | 149.476529 | 152.645868 | 131.383843 | 151.55435  | 166.759145 | 0.025098681 | 7.21624527 | 0.798012223 | HRR25     |
| YML014W   | 39.7857504 | 33.8437425 | 34.6207123 | 39.4979329 | 36.8786595 | 33.635894  | 0.025095464 | 5.18963368 | 0.828090032 | TRM9      |
| YHR020W   | 623.880023 | 527.801222 | 611.672934 | 612.809246 | 591.752625 | 589.499709 | 0.024999785 | 9.21192607 | 0.796431816 | YHR020W   |
| YAL032C   | 28.2117139 | 28.83625   | 30.2628604 | 30.4512506 | 30.7539351 | 27.6317901 | 0.024993284 | 4.88193384 | 0.818573828 | PRP45     |
| YGL200C   | 351.298312 | 279.268433 | 334.949339 | 344.897369 | 324.349765 | 312.923567 | 0.024899517 | 8.34307788 | 0.810884633 | EMP24     |
| YOR205C   | 49.4527013 | 55.0824176 | 56.8941775 | 49.9045739 | 57.3378452 | 57.1358277 | 0.024798485 | 5.7661654  | 0.797179216 | GEP3      |
| YDR221W   | 102.390766 | 88.6383731 | 100.775325 | 100.459563 | 99.624506  | 96.6467051 | 0.024716089 | 6.61770092 | 0.780853153 | GTB1      |
| YMR170C   | 40.1145582 | 37.2971856 | 40.1890786 | 39.3796756 | 38.3772623 | 41.8350467 | 0.024638669 | 5.30924286 | 0.803391292 | ALD2      |
| YJR041C   | 130.931288 | 125.878001 | 132.914483 | 111.694005 | 138.197238 | 146.616344 | 0.024536257 | 7.03498025 | 0.809690597 | URB2      |
| YGL252C   | 119.29149  | 124.323952 | 120.809339 | 134.340275 | 117.738053 | 118.532632 | 0.024527365 | 6.93831251 | 0.779627889 | RTG2      |
| YLR088W   | 170.125184 | 136.411003 | 146.169616 | 154.325756 | 151.35888  | 154.621816 | 0.024507019 | 7.25052186 | 0.799632369 | GAA1      |
| YCL058C   | 10.1930435 | 10.014985  | 10.1077954 | 7.09543704 | 11.3372558 | 12.4601297 | 0.02450102  | 3.36498407 | 0.907939276 | FVY5      |
| YPR111W   | 26.9622441 | 35.5129066 | 24.6944941 | 30.8060225 | 29.320489  | 28.600194  | 0.024495771 | 4.880701   | 0.857841684 | DBF20     |
| YBR165W   | 21.7013184 | 25.8432659 | 23.847134  | 23.4740709 | 25.4762471 | 23.7581747 | 0.02448443  | 4.59382802 | 0.835919171 | UBS1      |
| YKR099W   | 71.5485891 | 71.0258133 | 75.2334709 | 65.3371494 | 76.1681148 | 80.1192793 | 0.024379423 | 6.19671657 | 0.795143875 | BAS1      |
| YPL046C   | 1.24946985 | 1.78427894 | 1.39209158 | 1.47821605 | 1.56375941 | 1.48488592 | 0.02426322  | 0.6961335  | 1           | ELC1      |
| YNL181W   | 43.2711136 | 43.9738422 | 48.7232052 | 47.7759427 | 45.6096496 | 44.8693788 | 0.024159492 | 5.51832501 | 0.800113739 | YNL181W   |
| YAL009W   | 27.6198598 | 29.0664795 | 23.0602996 | 28.73652   | 24.4988975 | 27.8254709 | 0.02409706  | 4.75126792 | 0.853617469 | SPO7      |
| YHR042W   | 655.774385 | 529.125042 | 685.695891 | 603.230406 | 654.759098 | 644.053126 | 0.024091887 | 9.29662949 | 0.825000501 | NCP1      |
| YNL317W   | 28.0801908 | 31.6565618 | 31.5944263 | 31.5155662 | 27.8870429 | 33.5067735 | 0.024059965 | 4.94678912 | 0.833610923 | PFS2      |
| YJR033C   | 91.3428219 | 96.5237349 | 91.9385699 | 92.4180675 | 93.8255649 | 98.3252718 | 0.023982777 | 6.55745408 | 0.769516385 | RAV1      |
| YGR212W   | 11.9028443 | 13.007969  | 10.2288468 | 12.062243  | 12.379762  | 11.298045  | 0.02391973  | 3.57778372 | 0.894962638 | SL1       |
| YOR337W   | 77.4671305 | 76.6088796 | 78.8044885 | 69.8309262 | 79.8820434 | 87.1563473 | 0.023910732 | 6.29281634 | 0.798850608 | TEA1      |
| YGL224C   | 32.2889313 | 36.7791691 | 32.078632  | 38.6110032 | 29.5811156 | 34.6042979 | 0.023709136 | 5.09319588 | 0.848917451 | SDT1      |
| YER140W   | 39.9172735 | 40.8657435 | 38.1917298 | 39.2614183 | 40.6577448 | 41.0603236 | 0.023700022 | 5.32603022 | 0.802619593 | EMP65     |
| YGR151C   | 3.94569425 | 6.04352544 | 5.32626343 | 2.06950247 | 6.7762908  | 6.77882701 | 0.023695814 | 2.39657236 | 0.94930944  | YGR151C   |
| YKR082W   | 165.258828 | 180.615075 | 158.577388 | 175.90771  | 165.758498 | 171.149242 | 0.023654797 | 7.40664961 | 0.791664062 | NUP133    |
| YDR295C   | 34.7221094 | 36.2611526 | 31.3523234 | 32.1068526 | 35.3800567 | 36.6056659 | 0.023647841 | 5.10945605 | 0.824905542 | HDA2      |
| YHR134W   | 15.9800617 | 16.1160678 | 16.2814189 | 14.7230319 | 17.3968235 | 17.1084682 | 0.023633189 | 4.03413217 | 0.867494553 | WSS1      |
| YCR057C   | 276.001313 | 270.634825 | 292.64186  | 249.345483 | 286.298286 | 317.571905 | 0.023616499 | 8.14052697 | 0.818029581 | PWP2      |
| YNR038W   | 85.1612343 | 98.2504564 | 94.1780216 | 92.7137107 | 93.6952516 | 95.871982  | 0.023512329 | 6.54604419 | 0.783614286 | DBP6      |
| YDR058C   | 13.481122  | 16.2311826 | 11.499887  | 14.7821605 | 15.1814976 | 11.9436476 | 0.023456051 | 3.80620804 | 0.897713172 | TGL2      |
| YCL044C   | 73.3899131 | 55.2550897 | 66.0940871 | 55.8765667 | 69.9130771 | 72.1138074 | 0.023445123 | 6.03399608 | 0.848638184 | MGR1      |
| YGR245C   | 194.456965 | 185.392338 | 196.950695 | 194.414975 | 203.679664 | 188.12859  | 0.023429484 | 7.5995842  | 0.791074662 | SDA1      |
| YDL045C   | 20.1230407 | 27.7426596 | 20.8813737 | 21.9367262 | 22.4138849 | 25.6304221 | 0.023407485 | 4.5397527  | 0.870105853 | FAD1      |
| YBL091C   | 228.455697 | 217.91226  | 211.537394 | 255.199219 | 209.999858 | 203.30025  | 0.023348036 | 7.78922453 | 0.822205561 | MAP2      |
| YDR414C   | 47.4798542 | 43.2831536 | 46.7258565 | 39.970962  | 49.6493614 | 50.1633199 | 0.023299683 | 5.53338086 | 0.829152452 | ERD1      |
| YKR056W   | 91.7373914 | 105.502687 | 100.654274 | 88.8703489 | 99.624506  | 114.400776 | 0.023228246 | 6.647507   | 0.818719878 | TRM2      |
| YAL045C   | 0.26304628 | 0.11511477 | 0.06052572 | 0.41390049 | 0          | 0          | 0.022938843 | -1.8977068 | 1           | YEL045C   |
| YBL008W   | 42.0216438 | 48.0028592 | 47.6337423 | 45.2925398 | 46.3263726 | 48.3556327 | 0.022876842 | 5.53613896 | 0.808428631 | HIR1      |
| YPL029W   | 39.0623731 | 38.6785628 | 42.1864274 | 40.3848625 | 40.983528  | 40.4792813 | 0.022806401 | 5.33695281 | 0.812355468 | SUV3      |
| YOR368W   | 26.8307209 | 27.9153318 | 28.2049859 | 24.8931583 | 29.0598624 | 30.4078812 | 0.022767449 | 4.80739807 | 0.842740769 | RAD17     |
| YNL199C   | 59.0538906 | 64.5793861 | 63.3704297 | 60.1338289 | 64.6353891 | 65.3349804 | 0.022767167 | 5.97673192 | 0.792400532 | GCR2      |
| YDL201W   | 45.046676  | 57.2120408 | 49.5100396 | 55.5217948 | 49.6493614 | 49.0657955 | 0.022667645 | 5.67666052 | 0.832522196 | TRM8      |
| YHR179W   | 663.271204 | 703.523919 | 688.722177 | 704.281255 | 691.768071 | 691.956837 | 0.022601912 | 9.43195031 | 0.798927425 | OYE2      |
| YBR055C   | 71.2855428 | 83.1704215 | 76.2018825 | 76.8672346 | 80.9245497 | 76.6330254 | 0.022537088 | 6.27885143 | 0.79616823  | PRP6      |
| YGL048C   | 202.6114   | 196.903815 | 204.274308 | 211.207509 | 198.792916 | 203.17113  | 0.022375637 | 7.66499438 | 0.797005443 | RPT6      |
| YGR063C   | 35.5112483 | 23.7712001 | 28.0234087 | 31.6338235 | 27.4309464 | 29.4394773 | 0.022170244 | 4.87795188 | 0.886567319 | SPT4      |
| YNL201C   | 111.400101 | 116.265918 | 126.075076 | 115.655624 | 123.732464 | 119.888398 | 0.022046637 | 6.89433404 | 0.79575855  | PSY2      |
| YFL010C   | 131.45738  | 138.943528 | 134.972357 | 138.183636 | 137.675985 | 135.770221 | 0.021951637 | 7.0905941  | 0.787111592 | WMM1      |
| YEL043W   | 176.504056 | 163.923433 | 177.158785 | 148.885921 | 182.308285 | 194.390935 | 0.021927849 | 7.44263249 | 0.835138821 | YEL043W   |
| YOR371C   | 83.1883871 | 78.162929  | 84.6149577 | 79.2323803 | 83.9217552 | 86.575305  | 0.0218477   | 6.37033506 | 0.796401835 | GPB1      |
| YCR048W   | 188.735708 | 148.210267 | 196.587541 | 172.241734 | 184.784237 | 184.577776 | 0.021835144 | 7.48615826 | 0.842458652 | ARE1      |
| YOL057W   | 268.504494 | 213.480341 | 247.489672 | 246.86208  | 246.422421 | 247.136665 | 0.021741076 | 7.93715184 | 0.828753308 | YOL057W   |
| YCL037C   | 65.432763  | 66.1334355 | 69.4835275 | 57.7095546 | 73.1057526 | 73.4050125 | 0.021669642 | 6.08008481 | 0.831846207 | SR09      |
| YDR235W   | 39.3254194 | 51.9167614 | 41.6416959 | 43.10478   | 49.0629516 | 42.8680108 | 0.021618317 | 5.48513415 | 0.850940448 | PRP42     |
| YMR067C   | 57.5413745 | 61.9893038 | 53.8678915 | 56.1130813 | 59.1622312 | 60.8157623 | 0.021542608 | 5.86718769 | 0.812783059 | UBX4      |
| YHR112C   | 46.0988612 | 52.6650074 | 49.5705653 | 48.1898432 | 53.6239166 | 48.8721147 | 0.021466489 | 5.64284636 | 0.819739721 | YHR112C   |
| YDR168W   | 105.284275 | 109.359032 | 110.217338 | 111.812262 | 110.505665 | 107.428268 | 0.021452373 | 6.77121848 | 0.790852206 | CDC37     |
| YMR119W-A | 10.4560898 | 9.84231286 | 11.4393612 | 10.1701264 | 11.2069425 | 10.8461232 | 0.021436505 | 3.43000429 | 0.910904973 | YMR119W-A |
| YLR329W   | 2.69622441 | 4.08657435 | 3.51049181 | 3.54771852 | 3.97455518 | 2.96977183 | 0.021424563 | 1.84742845 | 0.940434462 | REC102    |
| YDR279C   | 1511.39818 | 1163.23475 | 1512.77987 | 1389.99612 | 1418.72073 | 1441.24318 | 0.021421744 | 10.4577195 | 0.848089557 | SCW4      |
| YPR032W   | 69.2469341 | 70.3351246 | 66.5782929 | 65.2188921 | 70.4343303 | 73.6632535 | 0.021411528 | 6.1160943  | 0.805667123 | SRO7      |

|           |            |            |            |            |            |            |             |            |             |           |
|-----------|------------|------------|------------|------------|------------|------------|-------------|------------|-------------|-----------|
| YER052C   | 250.617347 | 196.55847  | 227.334607 | 223.506267 | 224.464633 | 236.484222 | 0.021366296 | 7.82397569 | 0.835317912 | HOM3      |
| YBR022W   | 10.3903282 | 12.1446083 | 9.98674393 | 11.1753133 | 11.5327257 | 10.3296412 | 0.021325298 | 3.46698222 | 0.901206512 | POA1      |
| YLR319C   | 69.1811726 | 69.4717639 | 73.2361222 | 73.9108025 | 66.2643052 | 74.8253382 | 0.021223239 | 6.15535738 | 0.811160597 | BUD6      |
| YLR220W   | 122.513807 | 96.2935053 | 112.033109 | 117.429483 | 111.026918 | 107.105467 | 0.021223207 | 6.79671365 | 0.833148556 | CCC1      |
| YLR379W   | 73.0611052 | 52.8376796 | 65.7309328 | 64.3319625 | 67.762908  | 62.236088  | 0.021212665 | 6.00955112 | 0.855377576 | YLR379W   |
| YMR257C   | 57.0152819 | 51.2836302 | 51.7494913 | 54.6348652 | 49.9751446 | 57.71687   | 0.02119746  | 5.75075642 | 0.829516092 | PET111    |
| YHR085W   | 30.8421767 | 35.7431362 | 34.5601866 | 34.2354837 | 34.4678638 | 34.0232556 | 0.021183372 | 5.09222557 | 0.837683744 | IP11      |
| YJR110W   | 45.046676  | 39.1390219 | 40.7943358 | 46.8298845 | 39.8107084 | 40.0273595 | 0.021145591 | 5.39455344 | 0.851686343 | YMR1      |
| YCL057W   | 326.045868 | 305.169256 | 332.891464 | 334.431599 | 328.71526  | 315.118616 | 0.021126827 | 8.33918151 | 0.813616202 | PRD1      |
| YPR003C   | 48.5320393 | 45.12499   | 46.4232278 | 42.9273941 | 52.3207837 | 46.935307  | 0.021110876 | 5.55922381 | 0.833977988 | YPR003C   |
| YDR407C   | 184.000875 | 173.247729 | 185.14818  | 183.830948 | 190.843805 | 175.66846  | 0.021080654 | 7.50971036 | 0.811608754 | TRS120    |
| YKR079C   | 89.5672595 | 96.0057184 | 84.3123291 | 90.0529218 | 87.5053706 | 96.3239038 | 0.020939078 | 6.50389615 | 0.811338528 | TRZ1      |
| YOR132W   | 72.5350127 | 66.8241241 | 68.6361674 | 69.535283  | 68.8054142 | 72.6302894 | 0.020905664 | 6.12811655 | 0.808396769 | VPS17     |
| YLR380W   | 121.724668 | 110.740409 | 115.180447 | 118.139027 | 120.866571 | 113.626053 | 0.020882156 | 6.86824604 | 0.804458484 | CSR1      |
| YBR186W   | 12.6262216 | 11.9143787 | 10.834104  | 12.062243  | 11.8585089 | 11.9436476 | 0.02087233  | 3.58413754 | 0.902768954 | PCH2      |
| YGR035W-A | 2.95927069 | 2.7051971  | 2.42102883 | 2.18775975 | 3.12751883 | 2.90521158 | 0.020856766 | 1.50200154 | 0.963454454 | YGR035W-A |
| YMR217W   | 1195.28231 | 968.057661 | 1119.90741 | 1132.55001 | 1090.72219 | 1107.46665 | 0.020775082 | 10.1064835 | 0.837417538 | GUA1      |
| YGL092W   | 309.868522 | 311.155224 | 321.936309 | 314.860019 | 324.936175 | 316.861743 | 0.020771064 | 8.30708841 | 0.810717544 | NUP145    |
| YCL011C   | 289.67972  | 253.482724 | 290.09978  | 303.625577 | 265.383004 | 276.12422  | 0.020646174 | 8.12853664 | 0.833166339 | GBP2      |
| YGL141W   | 66.4849481 | 68.0903866 | 63.2493782 | 70.0674408 | 66.5249318 | 64.0437752 | 0.020640795 | 6.05613619 | 0.814074046 | HUL3      |
| YDL140C   | 746.065021 | 635.26086  | 759.174116 | 688.493908 | 742.329625 | 740.31247  | 0.020529293 | 9.48926873 | 0.837137485 | RPO21     |
| YDR232W   | 318.614811 | 244.849116 | 319.999486 | 291.563334 | 299.459928 | 304.982655 | 0.020489542 | 8.21276199 | 0.852479361 | HEM1      |
| YOR144C   | 40.0487967 | 46.1610229 | 38.7364613 | 43.5778092 | 39.6803951 | 43.5136134 | 0.020429454 | 5.39537856 | 0.845180374 | ELG1      |
| YKL090W   | 18.9393324 | 19.7421831 | 18.7024477 | 18.5072649 | 22.5441982 | 17.1730284 | 0.020041055 | 4.27712342 | 0.889085978 | CUE2      |
| YJL105W   | 15.1909229 | 13.9864446 | 15.0709045 | 14.1908741 | 13.8783648 | 16.7856669 | 0.01981395  | 3.90365663 | 0.897314765 | SET4      |
| YDL230W   | 26.5019131 | 26.9368562 | 25.6023799 | 27.080918  | 25.7368737 | 27.3089888 | 0.019808129 | 4.7362538  | 0.8597674   | PTP1      |
| YDL207W   | 71.3513044 | 79.0262898 | 76.5045111 | 77.8132929 | 74.2785722 | 77.9887908 | 0.019775207 | 6.25349227 | 0.814402272 | GLE1      |
| YCL004W   | 27.7513829 | 28.1455613 | 29.8997061 | 26.6670175 | 30.1023687 | 30.2787607 | 0.019745821 | 4.85423479 | 0.857413464 | PGS1      |
| YNL253W   | 27.0280056 | 28.9513647 | 28.8102431 | 28.3226195 | 29.9068988 | 27.7609106 | 0.019439994 | 4.83744284 | 0.856743852 | TEX1      |
| YOR201C   | 58.7908444 | 61.7015169 | 61.130978  | 66.6971082 | 58.7712913 | 58.5561533 | 0.019343398 | 5.93257698 | 0.834311347 | MRM1      |
| YDR448W   | 41.4955512 | 45.4127769 | 45.2127134 | 44.4056101 | 43.5897937 | 45.9669032 | 0.019227166 | 5.4749946  | 0.83649961  | ADA2      |
| YGL137W   | 539.902497 | 504.605596 | 502.108748 | 572.542641 | 515.323884 | 485.751376 | 0.019154268 | 9.02577063 | 0.842220318 | SEC27     |
| YML126C   | 852.664528 | 700.128033 | 832.349712 | 816.507418 | 792.956336 | 807.326017 | 0.019084805 | 9.64463416 | 0.849401675 | ERG13     |
| YDL143W   | 348.602087 | 333.02703  | 326.899418 | 358.437828 | 339.661576 | 323.70513  | 0.018990399 | 8.40306911 | 0.834168013 | CCT4      |
| YLR145W   | 10.3245666 | 11.1085753 | 12.1051442 | 12.1805003 | 11.5978823 | 10.2005206 | 0.018869065 | 3.50917525 | 0.917103782 | RMP1      |
| YKL033W-A | 117.976258 | 118.683328 | 123.593522 | 123.992762 | 116.760703 | 124.213935 | 0.018814405 | 6.91882731 | 0.82001828  | YKL033W-A |
| YDR503C   | 28.803568  | 24.1741018 | 23.9681854 | 28.1452336 | 25.5414038 | 24.1455362 | 0.018791511 | 4.69567961 | 0.891411008 | LPP1      |
| YML037C   | 14.0072146 | 14.9073628 | 15.8577388 | 13.2448158 | 17.5271368 | 14.6551784 | 0.018749964 | 3.92126387 | 0.904397698 | YML037C   |
| YOR025W   | 74.2448135 | 67.6874849 | 70.3914133 | 74.5612176 | 69.5221373 | 70.8871625 | 0.018697599 | 6.15656342 | 0.831987311 | HST3      |
| YAL031W-A | 5.39244881 | 5.06504989 | 3.63154325 | 4.90767729 | 5.21253138 | 4.13185646 | 0.018626585 | 2.27625254 | 0.952187575 | YAL031W-A |
| YFL045C   | 789.336135 | 654.485026 | 744.042686 | 786.35181  | 719.785427 | 709.969149 | 0.018603068 | 9.51985343 | 0.854086363 | SEC53     |
| YGR218W   | 386.480752 | 390.296629 | 383.430441 | 379.842396 | 393.546119 | 401.887601 | 0.018571256 | 8.60498901 | 0.831462475 | CRM1      |
| YDR311W   | 49.649986  | 48.9237774 | 48.1784738 | 48.8402583 | 48.997795  | 50.8089225 | 0.018516149 | 5.62508926 | 0.835951032 | TFB1      |
| YIL123W   | 805.973813 | 629.677793 | 804.628932 | 705.995966 | 749.952952 | 813.13644  | 0.01846855  | 9.55393304 | 0.870176996 | SIM1      |
| YOL100W   | 52.872303  | 55.4277619 | 53.9284172 | 54.2209647 | 57.4030018 | 52.7457302 | 0.018466511 | 5.76972521 | 0.83462971  | PKH2      |
| YOR239W   | 190.116701 | 166.973974 | 184.240294 | 197.075764 | 177.226067 | 173.731652 | 0.018148262 | 7.50527917 | 0.849749908 | ABP140    |
| YGL237C   | 17.7556241 | 22.9653967 | 15.0709045 | 17.9159785 | 18.1787032 | 20.4656016 | 0.01806108  | 4.23718319 | 0.91285991  | HAP2      |
| YKR002W   | 67.4713717 | 86.2209629 | 79.7729    | 82.8392275 | 80.2729833 | 73.3404523 | 0.017704599 | 6.29402201 | 0.86063714  | PAP1      |
| YBR199W   | 196.75862  | 204.098488 | 210.75056  | 214.814356 | 210.195328 | 194.132694 | 0.017673646 | 7.68128272 | 0.844083739 | KTR1      |
| YPR080W   | 1065.498   | 9538.87032 | 10274.7858 | 11065.9254 | 9984.9948  | 9904.77011 | 0.01766231  | 13.3241702 | 0.855765778 | TEF1      |
| YDR498C   | 38.470519  | 38.7936776 | 37.0417411 | 39.3205469 | 38.7682021 | 37.5740697 | 0.017222416 | 5.26503996 | 0.860341712 | SEC20     |
| YDL036C   | 26.6334362 | 31.7716766 | 28.6891917 | 30.9834084 | 28.408296  | 28.7938747 | 0.017200711 | 4.8754707  | 0.880383142 | PUS9      |
| YER136W   | 212.870205 | 236.157951 | 206.634811 | 225.98967  | 222.053837 | 215.502139 | 0.017144514 | 7.78136841 | 0.851452747 | GD11      |
| YKL041W   | 19.3339018 | 17.7276746 | 13.7998643 | 19.0985514 | 14.9208711 | 17.3667092 | 0.016827305 | 4.10152497 | 0.929410523 | VPS24     |
| YPL175W   | 38.7993268 | 39.1965793 | 37.4048955 | 40.3848625 | 37.7908525 | 38.5424736 | 0.016791681 | 5.27850664 | 0.86505901  | SPT14     |
| YLR322W   | 1.31523142 | 1.66916417 | 2.42102883 | 1.41908741 | 1.43344613 | 2.64697055 | 0.016770051 | 0.95697772 | 0.959366529 | VPS65     |
| YDR272W   | 43.4026368 | 44.0313996 | 37.283844  | 43.10478   | 42.4169741 | 40.6084018 | 0.01653393  | 5.39000902 | 0.874977262 | GLO2      |
| YGL160W   | 96.8667939 | 77.8175847 | 89.0333353 | 93.3641257 | 87.5705272 | 85.6069011 | 0.016337148 | 6.46741938 | 0.870370292 | AIM14     |
| YKL131W   | 2.30165498 | 2.87786926 | 2.54208027 | 1.8329879  | 2.67142233 | 3.35713338 | 0.016287257 | 1.4419728  | 1           | YKL131W   |
| YKL091C   | 23.4111192 | 28.3182335 | 20.280848  | 27.258304  | 23.6518611 | 22.4669695 | 0.016281561 | 4.61269182 | 0.912313878 | YKL091C   |
| YML127W   | 155.131546 | 145.27484  | 154.764268 | 159.35169  | 152.727169 | 148.16579  | 0.016279177 | 7.25448016 | 0.848733023 | TRC9      |
| YDR174W   | 224.444241 | 248.590346 | 226.245144 | 250.468928 | 234.172972 | 222.539207 | 0.016192253 | 7.87374203 | 0.862236849 | HMO1      |
| YDL237W   | 171.374654 | 128.928543 | 154.703742 | 166.801899 | 145.364469 | 147.778429 | 0.01618903  | 7.25364007 | 0.884288829 | AIM6      |
| YGL171W   | 71.2197812 | 77.0693387 | 80.3781572 | 77.0446205 | 74.669512  | 79.6027972 | 0.016183376 | 6.26293648 | 0.850573178 | ROK1      |
| YMR047C   | 329.728516 | 297.974583 | 348.5071   | 302.324747 | 343.180035 | 341.652881 | 0.016057952 | 8.35462395 | 0.870250305 | NUP116    |
| YHL030W   | 227.074704 | 191.205633 | 216.137349 | 209.84755  | 218.014125 | 213.565331 | 0.016053018 | 7.73300297 | 0.865930722 | ECM29     |
| YBR097W   | 52.1489257 | 61.3561726 | 52.4757999 | 58.5964842 | 55.187676  | 54.1014956 | 0.015975414 | 5.8017846  | 0.869089793 | VPS15     |
| YMR004W   | 40.7721739 | 43.8587275 | 43.3969418 | 44.5238674 | 40.9183713 | 44.0300955 | 0.015975035 | 5.42791804 | 0.86735298  | MVP1      |
| YOR140W   | 89.5672595 | 87.0267663 | 99.2016564 | 81.3018828 | 96.2363606 | 101.424164 | 0.015971389 | 6.53245339 | 0.872365458 | SFL1      |
| YNL186W   | 205.767955 | 196.673585 | 216.561029 | 196.839249 | 212.410654 | 216.664223 | 0.015943221 | 7.69766517 | 0.86052047  | UBP10     |
| YIL019W   | 20.5833717 | 19.7997405 | 20.2155907 | 19.3941946 | 19.9379325 | 21.9504875 | 0.01594317  | 4.35266224 | 0.901627263 | FAF1      |
| YCR054C   | 38.4047574 | 40.4628418 | 34.681238  | 38.6701319 | 39.2894553 | 36.8639069 | 0.015938177 | 5.25506491 | 0.878613715 | CTR86     |
| YDR353W   | 421.465908 | 470.589181 | 433.001007 | 458.601747 | 440.719528 | 440.430075 | 0.015859829 | 8.79529279 | 0.861549198 | TRR1      |



|           |            |            |            |            |            |             |             |            |             |           |
|-----------|------------|------------|------------|------------|------------|-------------|-------------|------------|-------------|-----------|
| YML006C   | 51.5570716 | 58.0178442 | 59.8599379 | 53.9253215 | 54.0800131 | 63.3981726  | 0.015696299 | 5.8312316  | 0.874587765 | GIS4      |
| YDR394W   | 169.13876  | 180.384845 | 162.269457 | 180.815387 | 174.554645 | 161.981685  | 0.015602542 | 7.42338465 | 0.863943221 | RPT3      |
| YHR104W   | 87.2656045 | 93.8760952 | 88.1859752 | 93.1276112 | 92.0011789 | 87.1563473  | 0.015590198 | 6.4982542  | 0.852156283 | GRE3      |
| YOL028C   | 14.0072146 | 16.28874   | 14.6472244 | 15.3734469 | 15.5724375 | 14.5260579  | 0.015544925 | 3.92617243 | 0.91808067  | YAP7      |
| YIR007W   | 34.1960169 | 38.6785628 | 35.5891238 | 33.9398405 | 38.1166357 | 37.7031902  | 0.015506257 | 5.18963232 | 0.878482435 | YIR007W   |
| YNL311C   | 42.1531669 | 42.7075798 | 39.5838214 | 38.3744887 | 41.7654077 | 45.7086621  | 0.015433347 | 5.38649295 | 0.879718238 | SKP2      |
| YKL079W   | 35.0509173 | 39.8872679 | 35.1049181 | 35.181542  | 38.246949  | 37.896871   | 0.01529009  | 5.21028878 | 0.880093761 | SMY1      |
| YGL019W   | 87.0025583 | 87.8901271 | 74.4466366 | 97.6805166 | 80.4032966 | 73.7923741  | 0.015252343 | 6.38673538 | 0.894531619 | CKB1      |
| YNL243W   | 430.672528 | 382.468824 | 418.535359 | 423.420205 | 421.237692 | 399.950794  | 0.015177328 | 8.68940454 | 0.869374333 | SLA2      |
| YLR404W   | 19.005094  | 20.9508882 | 20.2761165 | 18.1524931 | 19.4166794 | 23.3708131  | 0.015000954 | 4.3445826  | 0.912228309 | FLD1      |
| YGL124C   | 31.4340309 | 37.5849725 | 31.3523234 | 33.4668114 | 34.2072372 | 33.8295748  | 0.014893404 | 5.07808796 | 0.891884981 | MON1      |
| YFL028C   | 25.8442974 | 33.8437425 | 28.3865631 | 34.8267701 | 28.7340792 | 25.4367414  | 0.014888996 | 4.89090982 | 0.919328578 | CAF16     |
| YOR067C   | 178.34538  | 153.160202 | 181.637688 | 156.040486 | 172.404475 | 190.000837  | 0.014835778 | 7.4265452  | 0.886192495 | ALG8      |
| YHR078W   | 88.8438822 | 80.9256835 | 83.888649  | 78.3454507 | 85.9416111 | 91.9983666  | 0.014806231 | 6.41104681 | 0.870753674 | YHR078W   |
| YOL132W   | 4.14297896 | 3.91390219 | 3.63154325 | 4.0798763  | 2.99720554 | 4.71289878  | 0.014765761 | 2.01330263 | 0.972325017 | GAS4      |
| YHR188C   | 316.115871 | 258.432659 | 322.723143 | 290.499018 | 305.910435 | 310.018355  | 0.014751245 | 8.23228192 | 0.88630956  | GPH16     |
| YLR403W   | 175.649156 | 148.785841 | 179.337711 | 148.353763 | 175.531994 | 185.029697  | 0.014612043 | 7.39984462 | 0.892537967 | SFP1      |
| YNL212W   | 109.624539 | 110.625294 | 107.735783 | 120.977202 | 110.179882 | 100.068399  | 0.014557037 | 6.78139431 | 0.87497461  | VID27     |
| YDL225W   | 69.115411  | 73.2129939 | 72.2677106 | 70.5404699 | 71.5419932 | 74.7607779  | 0.014514094 | 6.17057057 | 0.861069239 | SHS1      |
| YIL079C   | 25.9100589 | 30.5629715 | 28.8707688 | 27.7313331 | 30.4281519 | 28.1482722  | 0.014444604 | 4.84496364 | 0.897111097 | AIR1      |
| YDR206W   | 140.992808 | 167.319319 | 157.972131 | 142.026998 | 159.242834 | 169.858037  | 0.014356919 | 7.28874891 | 0.882972726 | EBS1      |
| YDR172W   | 361.096786 | 361.172592 | 368.662165 | 372.924345 | 373.086934 | 355.727018  | 0.014234682 | 8.5140045  | 0.870601709 | SUP35     |
| YJL044C   | 97.8532174 | 99.9196206 | 86.9149351 | 106.66807  | 94.4771313 | 86.2525037  | 0.014123689 | 6.57717411 | 0.889753912 | GYP6      |
| YNL167C   | 85.0297111 | 80.8681261 | 90.607004  | 77.2220065 | 90.4374195 | 91.4173243  | 0.013970101 | 6.42692528 | 0.881412546 | SKO1      |
| YHR001W   | 64.4463394 | 73.9612399 | 63.0678011 | 71.9004287 | 67.567438  | 76.9392149  | 0.013836177 | 6.07951507 | 0.885112042 | OSH7      |
| YIL068W   | 50.7021711 | 62.0468612 | 55.0784059 | 52.9792632 | 55.3577011 | 57.2649482  | 0.013716738 | 5.81684889 | 0.887580733 | PRS4      |
| YJR104C   | 415.678889 | 410.384156 | 349.717615 | 490.885986 | 372.109584 | 323.898811  | 0.013712978 | 8.62178369 | 0.92005357  | SOD1      |
| YLR347C   | 286.786211 | 241.107886 | 269.944715 | 253.247974 | 267.98927  | 284.129692  | 0.013649804 | 8.06233733 | 0.88999935  | KAP95     |
| YIL060W   | 5.65549509 | 5.75573851 | 5.99204636 | 7.27282297 | 5.21253138 | 5.03570007  | 0.013525892 | 2.57479813 | 0.979293806 | YIL060W   |
| YDR545C-A | 6.7734418  | 12.4323952 | 3.26838892 | 13.0674299 | 5.53831459 | 4.06729621  | 0.013407804 | 2.94792737 | 0.978968014 | YDR545C-A |
| YLR376C   | 7.2337728  | 7.25223053 | 7.50518938 | 7.0363084  | 7.68848379 | 7.48898984  | 0.013341624 | 2.90467631 | 0.959488299 | PSY3      |
| YNL246W   | 106.599506 | 90.0197504 | 104.164765 | 99.8091477 | 101.774675 | 101.876086  | 0.013253221 | 6.65559352 | 0.885720275 | VSP75     |
| YER033C   | 32.025885  | 30.7932011 | 33.3496722 | 33.7033259 | 31.9919114 | 31.3117248  | 0.013241183 | 5.01442522 | 0.905095972 | ZRG8      |
| YOR370C   | 196.298289 | 222.171507 | 214.926835 | 213.158754 | 211.759087 | 214.404614  | 0.013229569 | 7.72964741 | 0.882747442 | MRS6      |
| YDL177C   | 4.47178682 | 6.73421406 | 4.84205766 | 4.84854864 | 6.05956773 | 5.35850135  | 0.013106097 | 2.46410808 | 0.958028015 | YDL177C   |
| YPL098C   | 32.025885  | 27.5124301 | 28.1444602 | 32.9937822 | 24.6943674 | 30.6661222  | 0.013043383 | 4.88090051 | 0.930387784 | MGR2      |
| YIL159W   | 74.1790519 | 66.2485503 | 73.478225  | 63.9771907 | 76.1681148 | 75.7291818  | 0.012997645 | 6.16457158 | 0.893968303 | BNR1      |
| YGL146C   | 10.7191361 | 10.8783458 | 10.4709497 | 10.6431556 | 10.1644362 | 11.5562861  | 0.012990733 | 3.44126228 | 0.939635756 | RRT6      |
| YNL234W   | 23.4768808 | 25.0950199 | 23.5445054 | 21.8775975 | 24.954994  | 26.0177837  | 0.012957122 | 4.60168383 | 0.914238678 | YNL234W   |
| YCL036W   | 81.5443479 | 75.3426172 | 91.0306841 | 74.1473171 | 83.2050322 | 92.8376499  | 0.012853661 | 6.37722778 | 0.90195831  | GFD2      |
| YOL120C   | 2214.65242 | 1850.98795 | 2165.06556 | 2057.44023 | 2110.81458 | 2117.44732  | 0.012696832 | 11.0266443 | 0.898279905 | RPL18A    |
| YKL092C   | 70.496404  | 75.6304041 | 69.1808989 | 73.3786447 | 73.2360659 | 70.6289214  | 0.012658835 | 6.17435455 | 0.881655096 | BUD2      |
| YDL227C   | 74.1790519 | 84.8971431 | 77.6544998 | 83.0166134 | 77.1454644 | 78.68989536 | 0.012594548 | 6.31113753 | 0.886034976 | HO        |
| YHR003C   | 55.8315737 | 59.2265493 | 55.5626117 | 57.8869405 | 54.4057963 | 59.8473585  | 0.012568952 | 5.83934985 | 0.888869458 | TCO1      |
| YOR151C   | 575.479507 | 564.177489 | 570.57597  | 573.725213 | 584.585394 | 566.709938  | 0.012429516 | 9.16154368 | 0.887212685 | RPB2      |
| YPL096W   | 23.0823114 | 25.2101347 | 22.8181967 | 22.8827845 | 24.954994  | 23.9518554  | 0.012403266 | 4.58142547 | 0.916709106 | PNG1      |
| YPR037C   | 34.7221094 | 32.9803817 | 36.194381  | 36.2458576 | 34.598177  | 33.8941351  | 0.012379518 | 5.12503219 | 0.909145457 | ERV2      |
| YHL034C   | 230.165498 | 231.323131 | 222.855704 | 268.917064 | 221.59774  | 199.555755  | 0.012251846 | 7.84053709 | 0.912337563 | SBP1      |
| YBL006C   | 36.4319103 | 39.8872679 | 37.5259469 | 34.5902556 | 37.8560092 | 42.4806493  | 0.012251386 | 5.25736156 | 0.90815503  | LDB7      |
| YLR313C   | 21.306749  | 26.7066267 | 22.0313624 | 26.6078889 | 22.8699814 | 21.1757644  | 0.012215516 | 4.56063461 | 0.933888995 | SPH1      |
| YBR274W   | 55.9630968 | 52.2045483 | 56.1678689 | 58.4190983 | 53.5587599 | 53.6495738  | 0.012207251 | 5.78447422 | 0.899193717 | CHK1      |
| YKL100C   | 222.931725 | 174.226205 | 217.287338 | 201.569541 | 206.220773 | 211.757644  | 0.012166533 | 7.68487449 | 0.908736214 | YPF1      |
| YDL087C   | 19.3339018 | 16.6340843 | 15.1919559 | 17.0290489 | 17.7877633 | 16.7211066  | 0.012094968 | 4.10667736 | 0.938620385 | LUC7      |
| YDR443C   | 69.4442188 | 67.0543537 | 68.2124873 | 65.5145353 | 71.8677764 | 69.0794753  | 0.012087461 | 6.10106405 | 0.888658958 | SSN2      |
| YER060W   | 46.6907153 | 43.8587275 | 48.7232052 | 48.6037437 | 44.9580832 | 46.8061865  | 0.012037825 | 5.54630861 | 0.90405853  | FCY21     |
| YBR237W   | 38.2074727 | 40.347727  | 43.9416733 | 42.454365  | 41.5699378 | 39.5108774  | 0.01194141  | 5.36236506 | 0.906981958 | PRP5      |
| YMR259C   | 133.693274 | 136.180773 | 133.761843 | 123.63799  | 137.024419 | 146.422663  | 0.011922455 | 7.07932684 | 0.893023906 | TRM732    |
| YGL155W   | 55.9630968 | 60.7230413 | 51.810017  | 59.3651566 | 56.3604956 | 54.1660558  | 0.011899577 | 5.82097659 | 0.902385304 | CDC43     |
| YDL039C   | 223.786626 | 189.996928 | 277.51043  | 154.444013 | 244.663192 | 297.881027  | 0.011715629 | 7.85460813 | 0.950929997 | PRM7      |
| YMR229C   | 488.411187 | 467.250853 | 498.005631 | 457.419175 | 500.012073 | 508.089225  | 0.011680775 | 8.9267234  | 0.898428201 | RRP5      |
| YGR046W   | 48.4005162 | 57.6724999 | 53.3836857 | 46.5933699 | 54.5361096 | 59.7827982  | 0.011578437 | 5.74195597 | 0.913624972 | TAM41     |
| YJR004C   | 47.1510463 | 43.8011701 | 47.1495365 | 42.0995931 | 48.3462286 | 48.8075545  | 0.011578411 | 5.53402696 | 0.907958491 | SAG1      |
| YLR217W   | 26.3046283 | 33.7286277 | 29.476026  | 30.1556074 | 28.408296  | 31.7636466  | 0.011551051 | 4.91235187 | 0.92273112  | YLR217W   |
| YLR261C   | 2.63046283 | 2.35985279 | 2.54208027 | 2.9564321  | 2.99720554 | 1.61400643  | 0.011426248 | 1.40192916 | 1           | VPS63     |
| YPL081W   | 116.463742 | 135.202298 | 116.572538 | 140.19401  | 122.038391 | 108.913154  | 0.011421744 | 6.94696483 | 0.915102814 | RPS9A     |
| YLR361C   | 70.1675961 | 58.7660902 | 69.0598474 | 72.4917151 | 61.4427137 | 65.4641009  | 0.011421305 | 6.05209768 | 0.916978728 | DCR2      |
| YOR074C   | 45.1124376 | 46.2185803 | 42.8522103 | 52.3879768 | 40.7880581 | 41.9641676  | 0.011359832 | 5.49277427 | 0.925722251 | CDC21     |
| YDR268W   | 24.3975428 | 30.4478567 | 24.1497626 | 27.9678477 | 26.7142233 | 24.9848196  | 0.011269009 | 4.73257848 | 0.931459466 | MSW1      |
| YGR278W   | 22.6219804 | 24.4043313 | 20.6997965 | 21.2271825 | 24.1079576 | 22.9834516  | 0.011250713 | 4.51064588 | 0.929547243 | CWC22     |
| YAL023C   | 1065.0744  | 811.271344 | 1023.97414 | 972.843547 | 966.794258 | 983.123598  | 0.011177536 | 9.92275632 | 0.91940533  | PMT2      |
| YOL035C   | 4.40602525 | 5.75573851 | 5.62889203 | 5.32157778 | 5.21253138 | 5.42306161  | 0.011173905 | 2.43950324 | 0.97612664  | YOL035C   |
| YML067C   | 115.148511 | 116.496148 | 121.898802 | 109.328859 | 123.341524 | 123.697453  | 0.011064026 | 6.88794755 | 0.897674565 | ERV41     |
| YKL113C   | 59.5142216 | 60.2050249 | 60.707298  | 64.2137052 | 62.4852199 | 55.0698994  | 0.011033158 | 5.9187737  | 0.908077777 | RAD27     |

|           |            |            |            |            |            |            |             |            |             |           |
|-----------|------------|------------|------------|------------|------------|------------|-------------|------------|-------------|-----------|
| YOR292C   | 35.248202  | 27.9728892 | 33.4707236 | 33.8807119 | 29.4508023 | 33.9586953 | 0.010674285 | 5.01988168 | 0.939842192 | YOR292C   |
| YOR114W   | 7.10224965 | 8.74872254 | 6.83940645 | 8.27800988 | 7.49301386 | 7.1016283  | 0.010605686 | 2.95059491 | 0.96386503  | YOR114W   |
| YDR162C   | 12.4946985 | 14.5620184 | 15.4945845 | 14.36826   | 14.7254012 | 13.8158951 | 0.010465356 | 3.84564983 | 0.940805531 | NBP2      |
| YMR135C   | 51.2282637 | 57.0393687 | 50.7810797 | 54.0435788 | 50.4312411 | 55.7800623 | 0.010442017 | 5.73741566 | 0.912588466 | GID8      |
| YGL084C   | 161.57618  | 126.56869  | 145.26173  | 146.520775 | 141.45507  | 148.424031 | 0.010439408 | 7.18063187 | 0.918244213 | GUP1      |
| YCR049C   | 24.4633044 | 19.7421831 | 24.6944941 | 24.3610005 | 22.1532584 | 22.7897708 | 0.010432987 | 4.53298625 | 0.948315509 | YCR049C   |
| YMR111C   | 14.401784  | 14.9649201 | 14.2840701 | 13.6587163 | 14.4647746 | 15.8818233 | 0.010389561 | 3.88067022 | 0.951696446 | YMR111C   |
| YMR184W   | 22.227411  | 30.5054141 | 25.8444828 | 29.0321632 | 28.0173562 | 22.1441682 | 0.010299505 | 4.7250715  | 0.946066243 | ADD37     |
| YGR160W   | 99.1026873 | 109.934606 | 105.677909 | 106.963713 | 105.227977 | 104.845858 | 0.010262725 | 6.72007926 | 0.901479487 | YGR160W   |
| YDR427W   | 124.7497   | 166.053056 | 134.003946 | 143.859986 | 150.96794  | 133.12325  | 0.010184634 | 7.15251498 | 0.924743731 | RPN9      |
| YDR459C   | 40.2460814 | 37.9878742 | 42.2469531 | 37.1327872 | 41.1138413 | 43.1262519 | 0.010173144 | 5.33704699 | 0.922993078 | PFA5      |
| YDR215C   | 3.48536326 | 3.45344311 | 2.72365744 | 3.54771852 | 2.99720554 | 3.16345261 | 0.010030837 | 1.74614132 | 1           | YDR215C   |
| YMR139W   | 41.1667434 | 45.2976621 | 43.2153646 | 49.1359015 | 41.6350944 | 39.7691185 | 0.010013414 | 5.44339361 | 0.930341886 | RIM11     |
| YNL029C   | 43.4683983 | 41.095973  | 37.7075241 | 45.4107971 | 41.0486846 | 36.5411056 | 0.009845034 | 5.35780069 | 0.937196221 | KTR5      |
| YNL046W   | 41.7585975 | 30.9658732 | 37.8285755 | 32.875525  | 36.0967798 | 42.2869685 | 0.009814068 | 5.21184842 | 0.946106544 | YNL046W   |
| YLR222C   | 151.383136 | 153.966005 | 154.037959 | 157.282188 | 154.225772 | 151.006442 | 0.009809496 | 7.26470057 | 0.905471501 | UTP13     |
| YKL064W   | 138.888438 | 129.158772 | 134.246049 | 138.124508 | 132.398297 | 134.414456 | 0.009771908 | 7.07316498 | 0.908742806 | MNR2      |
| YGL220W   | 51.2940253 | 51.3987449 | 54.6547259 | 57.47304   | 50.822181  | 50.0341994 | 0.009638525 | 5.72100943 | 0.924933113 | FRA2      |
| YDL236W   | 103.114143 | 110.164835 | 108.280515 | 110.629689 | 103.468748 | 109.623317 | 0.009555882 | 6.7505947  | 0.909068075 | PHO13     |
| YJR116W   | 36.3661487 | 28.7211352 | 36.9812154 | 34.0580978 | 31.9919114 | 36.6056659 | 0.009441058 | 5.0972062  | 0.94652947  | TDA4      |
| YKL149C   | 23.4111192 | 28.83625   | 25.5418542 | 27.6130758 | 26.9096933 | 23.8227349 | 0.009308292 | 4.7095348  | 0.942769858 | DBR1      |
| YLR083C   | 536.811703 | 421.665404 | 518.52385  | 474.389095 | 497.14518  | 514.868052 | 0.00923498  | 8.94836868 | 0.931067921 | EMP70     |
| YDR227W   | 83.1226256 | 85.9907334 | 85.5833692 | 79.4688949 | 90.7632027 | 86.1879434 | 0.009108101 | 6.41454853 | 0.914623493 | SIR4      |
| YAL001C   | 93.1841459 | 97.6748826 | 101.441108 | 101.169106 | 100.015446 | 92.9667705 | 0.009035059 | 6.61284208 | 0.916570023 | TFC3      |
| YNL173C   | 47.1510463 | 44.837203  | 44.3048276 | 51.1462753 | 42.5472874 | 43.3199326 | 0.008979233 | 5.51358472 | 0.938729317 | MDG1      |
| YDR522C   | 7.43105751 | 6.33131237 | 7.62624082 | 5.9128642  | 6.97176072 | 8.65107447 | 0.008882672 | 2.86049752 | 0.98250977  | SPS2      |
| YDR465C   | 79.3084545 | 91.5737998 | 85.7044206 | 87.9242907 | 87.1144307 | 83.2181716 | 0.008852739 | 6.42533047 | 0.918911559 | RMT2      |
| YJR043C   | 19.6627097 | 24.4618887 | 23.6655568 | 21.1089252 | 22.7396681 | 24.4683375 | 0.008726541 | 4.5119915  | 0.945383091 | POL32     |
| YNL260C   | 10.6533745 | 11.2812475 | 9.56306389 | 12.8309153 | 9.31739984 | 9.49035782 | 0.008717424 | 3.41458702 | 0.987051428 | LTO1      |
| YIR006C   | 513.66363  | 450.78944  | 508.47658  | 476.931626 | 513.238871 | 491.626359 | 0.00870177  | 8.94416576 | 0.926700061 | PAN1      |
| YER172C   | 218.722985 | 196.443355 | 210.690034 | 197.903566 | 219.382414 | 212.338686 | 0.008695563 | 7.7098065  | 0.925317282 | BRR2      |
| YOL072W   | 26.5676746 | 34.1890868 | 29.1733974 | 28.7956487 | 30.8842484 | 30.9243632 | 0.00867691  | 4.91767474 | 0.940213022 | THP1      |
| YMR087W   | 22.9507882 | 23.1380688 | 21.4866309 | 24.5975151 | 21.7623185 | 21.5631259 | 0.008499418 | 4.50552507 | 0.954628568 | YMR087W   |
| YMR022W   | 46.1646227 | 49.4993512 | 50.1758225 | 47.4802995 | 49.9751446 | 49.3240365 | 0.008411615 | 5.6116463  | 0.92604321  | UBC7      |
| YDR087C   | 29.9215147 | 31.7716766 | 33.9549294 | 32.875525  | 29.3856457 | 33.9586953 | 0.008371813 | 5.00495015 | 0.943766208 | RRP1      |
| YJR151C   | 29.0008528 | 24.4618887 | 28.6891917 | 24.7157724 | 27.3657898 | 30.5370017 | 0.008293549 | 4.784819   | 0.95312006  | DAN4      |
| YGL064C   | 32.2231697 | 35.2826771 | 34.6207123 | 33.52594   | 33.8162973 | 35.4435812 | 0.00828809  | 5.09931308 | 0.936175243 | MRH4      |
| YCR002C   | 123.434469 | 126.56869  | 127.588219 | 134.872432 | 127.973234 | 122.85817  | 0.008245839 | 6.98127409 | 0.924413431 | CDC10     |
| YNL022C   | 54.1875344 | 65.5578617 | 56.1678689 | 56.8817536 | 60.1395808 | 60.0410393 | 0.008194779 | 5.88173493 | 0.930713239 | RCM1      |
| YJL141C   | 63.131108  | 71.1984854 | 60.5862465 | 65.2780208 | 66.3946185 | 64.4311367 | 0.008190611 | 6.02904161 | 0.928911278 | YAK1      |
| YIL041W   | 263.835422 | 279.844007 | 269.884189 | 284.172254 | 264.601124 | 269.409954 | 0.008171213 | 8.08794685 | 0.927008702 | GVP36     |
| YJR155W   | 12.8892679 | 12.3748378 | 12.347247  | 12.8309153 | 12.379762  | 12.5892502 | 0.008050905 | 3.66577019 | 0.972237531 | AAD10     |
| YLR116W   | 86.6079888 | 84.8971431 | 95.0253816 | 84.9678586 | 92.7179019 | 90.3843602 | 0.008016021 | 6.47926375 | 0.927144741 | MSL5      |
| YMR144W   | 19.1366171 | 19.3968388 | 19.9734879 | 20.2219956 | 19.3263661 | 19.3035169 | 0.007744414 | 4.29871433 | 0.958725026 | YMR144W   |
| YBR201W   | 5.98430295 | 8.46093562 | 6.77888073 | 7.56846618 | 6.51566423 | 7.29530907 | 0.007740755 | 2.85639994 | 0.98186831  | DER1      |
| YLR354C   | 697.993313 | 710.54592  | 683.274862 | 808.820694 | 695.28653  | 598.731826 | 0.007644768 | 9.44966656 | 0.94560389  | TAL1      |
| YMR276W   | 283.235086 | 263.900611 | 271.397332 | 256.02702  | 283.105611 | 283.742331 | 0.007607794 | 8.0963338  | 0.933937924 | DSK2      |
| YCR008W   | 142.242278 | 128.870985 | 139.572312 | 123.756248 | 142.497577 | 146.616344 | 0.007545577 | 7.10185979 | 0.936084126 | SAT4      |
| YLR171W   | 9.14085835 | 9.6696407  | 10.410424  | 8.92842494 | 9.64318305 | 10.8461232 | 0.007533954 | 3.30664846 | 0.968989958 | YLR171W   |
| YPL242C   | 154.145122 | 157.131661 | 149.982736 | 166.698161 | 160.611123 | 156.429503 | 0.007514929 | 7.26945379 | 0.929145227 | IQG1      |
| YDL152W   | 3.81417111 | 3.51100049 | 2.66313171 | 2.71991753 | 4.30033839 | 3.03433209 | 0.007486915 | 1.78797633 | 1           | YDL152W   |
| YPR133C   | 73.9160057 | 73.7885678 | 71.6019277 | 81.1244968 | 75.0604519 | 64.1728957 | 0.007476188 | 6.19792564 | 0.943684728 | SPN1      |
| YLR092W   | 28.803568  | 30.2751846 | 29.7786546 | 27.080918  | 29.1250191 | 33.1839722 | 0.007345489 | 4.89854503 | 0.949681249 | SUL2      |
| YJL207C   | 208.266895 | 205.076963 | 196.04281  | 198.672237 | 212.019714 | 201.815364 | 0.007340727 | 7.67077689 | 0.934038216 | LA41      |
| YDL105W   | 11.3109902 | 13.4108707 | 11.1367326 | 11.8257284 | 12.7707019 | 11.4917258 | 0.007279088 | 3.59949062 | 0.960336705 | NSE4      |
| YIR027C   | 9.20661992 | 6.9644436  | 7.5657151  | 7.09543704 | 8.47036349 | 8.26371293 | 0.007234219 | 3.00579383 | 0.982873232 | DAL1      |
| YDR180W   | 90.2248752 | 88.2930288 | 94.0569701 | 87.0964897 | 93.8255649 | 93.0313307 | 0.007039788 | 6.51104951 | 0.933742539 | SCC2      |
| YHL023C   | 79.1769313 | 85.0698152 | 75.5966253 | 81.4792687 | 82.0973693 | 77.4723087 | 0.007024029 | 6.32693676 | 0.936349411 | NPR3      |
| YFR012W   | 1.44675456 | 0.92091816 | 2.29997739 | 1.00518691 | 2.08501255 | 1.61400643 | 0.006957511 | 0.74421872 | 1           | DCV1      |
| YNL126W   | 66.4191866 | 78.911175  | 70.6940419 | 71.0134991 | 70.4343303 | 75.7291818 | 0.006798281 | 6.17662845 | 0.939967227 | SPC98     |
| YPL086C   | 96.9325555 | 112.812475 | 107.675257 | 104.835082 | 106.53111  | 107.686509 | 0.006791602 | 6.73082153 | 0.936801719 | ELP3      |
| YHR041C   | 75.7573296 | 55.3126471 | 66.5782929 | 63.7998047 | 66.3946185 | 68.2401919 | 0.006647564 | 6.0467981  | 0.957842148 | SRB2      |
| YGR171C   | 35.9715793 | 40.6930713 | 36.1338553 | 38.0197168 | 37.2044427 | 38.155112  | 0.00660605  | 5.2414179  | 0.949240974 | MSM1      |
| YHR151C   | 74.5078598 | 57.2120408 | 73.5387508 | 64.3319625 | 65.6778954 | 76.1165433 | 0.006579215 | 6.10147664 | 0.958077366 | MTC6      |
| YBL002W   | 472.825695 | 406.930713 | 458.966541 | 426.672281 | 462.22122  | 455.859977 | 0.006532898 | 8.80526641 | 0.946013413 | HTB2      |
| YMR172C-A | 4.7348331  | 3.56855788 | 3.44996609 | 3.60684716 | 4.30033839 | 3.87361544 | 0.006503206 | 2.01198106 | 1           | YMR172C-A |
| YOR086C   | 423.438755 | 361.230149 | 422.106377 | 421.114188 | 408.27152  | 382.713205 | 0.006490812 | 8.65557347 | 0.947981495 | TCB1      |
| YGR133W   | 18.2817167 | 18.0730189 | 16.3419446 | 19.15768   | 16.5497871 | 17.1730284 | 0.00645357  | 4.14776077 | 0.968635831 | PEX4      |
| YDR434W   | 147.963534 | 133.072674 | 148.590645 | 145.692974 | 139.500371 | 146.228983 | 0.006318419 | 7.1661727  | 0.944416493 | GPH17     |
| YOL080C   | 15.3882076 | 17.9003468 | 17.7945619 | 16.674277  | 17.5271368 | 17.1730284 | 0.006300322 | 4.10493131 | 0.967625005 | REX4      |
| YHR195W   | 31.8286003 | 30.332742  | 29.7786546 | 35.5363138 | 28.7992359 | 27.8900311 | 0.006251665 | 4.94621665 | 0.969942756 | NVJ1      |
| YMR235C   | 327.3611   | 316.680733 | 303.899644 | 363.049862 | 305.714965 | 283.161288 | 0.00624323  | 8.30734237 | 0.953621197 | RNA1      |
| YOR295W   | 8.87781207 | 10.5905589 | 8.59465235 | 10.3475124 | 9.38255649 | 8.4573937  | 0.006086445 | 3.24987208 | 0.984708713 | UAF30     |

|           |            |            |            |            |            |            |             |            |             |           |
|-----------|------------|------------|------------|------------|------------|------------|-------------|------------|-------------|-----------|
| YDR423C   | 32.2231697 | 29.9298403 | 31.5944263 | 31.3973089 | 29.4508023 | 33.2485325 | 0.006029181 | 4.97392844 | 0.963218206 | CAD1      |
| YKL204W   | 84.7009033 | 87.9476845 | 92.4833014 | 80.2375672 | 91.3496125 | 94.7744577 | 0.005983166 | 6.47085131 | 0.946834609 | EAP1      |
| YHR135C   | 206.162525 | 210.66003  | 209.661097 | 206.595475 | 215.668486 | 206.851064 | 0.005963951 | 7.7100486  | 0.945410673 | YCK1      |
| YMR080C   | 245.027613 | 238.575361 | 264.800028 | 249.404612 | 253.003242 | 249.073473 | 0.005924306 | 7.96637849 | 0.947900234 | NAM7      |
| YJR135C   | 4.93211781 | 5.4103942  | 5.50784059 | 4.61203408 | 4.95190481 | 6.39146547 | 0.005897164 | 2.43893685 | 1           | MCM22     |
| YDR321W   | 349.98308  | 278.347515 | 329.441498 | 313.440931 | 312.81704  | 335.325976 | 0.005887629 | 8.32190965 | 0.955212438 | ASP1      |
| YKL040C   | 29.1323759 | 34.7071032 | 31.7760034 | 32.8163963 | 33.2950442 | 29.9559594 | 0.005728181 | 5.00381796 | 0.960714228 | NFU1      |
| YGL136C   | 19.5969481 | 22.274708  | 24.3313398 | 22.4097553 | 22.6093549 | 21.4985657 | 0.005701652 | 4.47599158 | 0.967712041 | MRM2      |
| YOR093C   | 112.846856 | 112.294458 | 106.464743 | 105.958526 | 113.698341 | 113.303251 | 0.005699903 | 6.79283378 | 0.946312897 | YOR093C   |
| YMR118C   | 13.6126452 | 13.6986577 | 12.6498756 | 13.8361022 | 12.9010152 | 13.3639733 | 0.005688808 | 3.75167197 | 0.973658403 | SHH3      |
| YML078W   | 166.113728 | 155.347382 | 166.506258 | 172.596506 | 163.282546 | 153.911653 | 0.005676456 | 7.34947754 | 0.95139376  | CPR3      |
| YER167W   | 96.8010323 | 96.696407  | 96.0543189 | 89.520764  | 98.0607466 | 103.167291 | 0.005558087 | 6.59741197 | 0.948906653 | BCK2      |
| YJR017C   | 68.1289874 | 68.0903866 | 62.8862239 | 80.0601813 | 62.8761598 | 56.8130264 | 0.005554315 | 6.05787943 | 0.967800597 | ESS1      |
| YNR024W   | 6.51039552 | 7.71268961 | 6.29467496 | 7.62759482 | 5.66862788 | 7.29530907 | 0.005369491 | 2.80499017 | 1           | MPP6      |
| YLR071C   | 126.064931 | 125.647772 | 123.47247  | 117.725126 | 122.755114 | 136.157583 | 0.005360635 | 6.97062919 | 0.951524012 | RGR1      |
| YGR083C   | 173.281739 | 182.111567 | 170.561481 | 174.252108 | 173.772765 | 179.864877 | 0.005181515 | 7.45752093 | 0.952566139 | GCD2      |
| YDR359C   | 65.2354783 | 67.5723702 | 67.6677558 | 66.8153655 | 67.6325947 | 66.755306  | 0.004952247 | 6.06765333 | 0.954539293 | EAF1      |
| YNR051C   | 264.953369 | 203.292684 | 247.187044 | 259.397353 | 232.609213 | 225.702659 | 0.004930809 | 7.90068347 | 0.96627384  | BRE5      |
| YLR174W   | 15.7170154 | 12.3172804 | 14.4656473 | 16.1421193 | 14.1389914 | 12.2664489 | 0.004870509 | 3.83749699 | 1           | IDP2      |
| YPL145C   | 460.725565 | 356.625558 | 407.701255 | 423.183691 | 399.736    | 406.084018 | 0.004833031 | 8.67636377 | 0.964237733 | KES1      |
| YMR086W   | 178.937234 | 154.311135 | 178.671928 | 168.161858 | 177.226067 | 168.17947  | 0.004828256 | 7.41806437 | 0.960577394 | SEG1      |
| YCR082W   | 21.1094642 | 33.7861851 | 21.9103109 | 26.5487603 | 26.779938  | 23.8227349 | 0.004799205 | 4.69018551 | 0.978344494 | AHC2      |
| YHR168W   | 40.3118429 | 37.7576447 | 36.6785868 | 36.1867289 | 39.7455518 | 39.1880762 | 0.004647723 | 5.26392768 | 0.968057329 | MTG2      |
| YGL011C   | 104.889706 | 132.151756 | 98.8385021 | 112.226163 | 117.933522 | 106.911786 | 0.004639647 | 6.81119689 | 0.965737414 | SCL1      |
| YNL267W   | 145.135787 | 129.619231 | 138.724952 | 144.451272 | 136.372852 | 133.833413 | 0.004571738 | 7.1100148  | 0.961523989 | PIK1      |
| YKL005C   | 56.4891894 | 57.3271556 | 51.8705427 | 57.1182682 | 58.640978  | 50.4215609 | 0.004483304 | 5.79278854 | 0.967367523 | BYE1      |
| YPR174C   | 22.8192651 | 21.814249  | 25.2392256 | 23.0601704 | 23.8473311 | 23.1771324 | 0.004379264 | 4.55135158 | 0.978498087 | YPR174C   |
| YHR192W   | 31.105223  | 29.584496  | 31.7154777 | 33.0529109 | 31.6009715 | 27.9545914 | 0.004194656 | 4.95246296 | 0.97974168  | LNP1      |
| YDR035W   | 213.856628 | 210.717587 | 203.003268 | 233.617265 | 201.790121 | 193.874453 | 0.004166477 | 7.71157327 | 0.967618951 | AR03      |
| YER127W   | 45.1124376 | 52.8952369 | 54.3520973 | 48.7811297 | 50.6918677 | 53.455893  | 0.004108427 | 5.67281632 | 0.966224906 | LCP5      |
| YDR013W   | 15.9143001 | 20.4904291 | 17.7945619 | 18.9211654 | 18.765113  | 16.7211066 | 0.003958967 | 4.18927495 | 0.980916527 | PSF1      |
| YNL218W   | 29.72423   | 28.4333483 | 29.5970775 | 30.1556074 | 28.9295492 | 28.858435  | 0.003845832 | 4.87807633 | 0.980556001 | MSG1      |
| YBR084W   | 535.233425 | 541.384765 | 557.623466 | 510.575824 | 557.871171 | 570.196192 | 0.003815356 | 9.09169533 | 0.96674997  | MIS1      |
| YML096W   | 51.8858794 | 58.3056311 | 51.6889656 | 51.205404  | 54.0800131 | 57.1358277 | 0.00375571  | 5.75960134 | 0.967943705 | YML096W   |
| YHR062C   | 43.5341599 | 41.3262025 | 40.2496043 | 40.9761489 | 39.9410217 | 44.4820173 | 0.00363893  | 5.38782239 | 0.976679879 | RPP1      |
| YKR086W   | 66.0903787 | 69.0113048 | 65.9730357 | 64.1545766 | 68.4144744 | 69.0794753 | 0.003512534 | 6.07130054 | 0.967843557 | PRP16     |
| YGL003C   | 75.6258065 | 64.6945009 | 79.9544772 | 71.8413    | 73.6921624 | 75.2126997 | 0.003479684 | 6.2019287  | 0.975591781 | CDH1      |
| YDR287W   | 21.7013184 | 24.4043313 | 23.1208253 | 23.9471    | 23.8473311 | 21.6276862 | 0.003401478 | 4.53867291 | 0.983091717 | INM2      |
| YJR014W   | 70.4306424 | 71.428715  | 77.8360769 | 75.3890186 | 70.1085471 | 74.6962177 | 0.003330336 | 6.19857969 | 0.97290118  | TMA22     |
| YDL195W   | 729.558867 | 600.553757 | 726.671804 | 623.629787 | 724.150922 | 713.713644 | 0.003314441 | 9.42306874 | 0.975651413 | SEC31     |
| YNR054C   | 37.6813801 | 38.2181037 | 37.6469983 | 35.7136998 | 37.8560092 | 40.2856005 | 0.003208045 | 5.24866416 | 0.976927847 | ESF2      |
| YCL039W   | 70.1018345 | 66.4787798 | 76.2624082 | 69.4761544 | 69.7176072 | 74.1151753 | 0.003172113 | 6.15268153 | 0.975015087 | GDM7      |
| YBR263W   | 378.45784  | 338.610097 | 340.396654 | 359.2065   | 350.086639 | 350.368516 | 0.003133294 | 8.46340063 | 0.973697198 | SH1       |
| YIL084C   | 24.4633044 | 24.807233  | 22.333991  | 24.7157724 | 23.3260779 | 23.6936144 | 0.003096199 | 4.58597146 | 0.988413853 | SDS3      |
| YER088C-A | 3.48536326 | 2.87786926 | 3.26838892 | 2.77904617 | 3.25783211 | 3.61537441 | 0.003094836 | 1.7349328  | 1           | YER088C-A |
| YAL042C-A | 53.792965  | 49.9022529 | 52.5363256 | 45.2334111 | 47.8901321 | 63.4627329 | 0.002931453 | 5.70714476 | 0.983146601 | YAL042C-A |
| YOR349W   | 55.0424348 | 51.0534006 | 57.2573319 | 52.861006  | 51.0828075 | 59.718238  | 0.002877084 | 5.77134217 | 0.981173748 | CIN1      |
| YMR273C   | 82.7280562 | 73.4432234 | 85.0991634 | 79.8236667 | 84.6384783 | 77.2140677 | 0.002772695 | 6.33280668 | 0.979980836 | ZDS1      |
| YGR109C   | 9.60118935 | 12.1446083 | 9.19990956 | 10.2883837 | 11.2069429 | 9.55491807 | 0.002619854 | 3.38767573 | 0.986278466 | CLB6      |
| YML017W   | 106.665268 | 90.710439  | 103.498983 | 95.6701428 | 97.80012   | 107.88019  | 0.002574409 | 6.65073331 | 0.98151791  | PSP2      |
| YGR081C   | 16.7692006 | 20.7206587 | 18.3998191 | 19.5715805 | 19.8076192 | 16.6565464 | 0.002555627 | 4.23220567 | 0.990855615 | SLX9      |
| YPL108W   | 4.40602525 | 5.58306636 | 5.32626343 | 5.43983506 | 5.47315795 | 4.45465775 | 0.002523041 | 2.39185854 | 1           | YPL108W   |
| YML003W   | 8.74628893 | 7.07955837 | 8.23149803 | 7.09543704 | 9.2522432  | 7.74723087 | 0.002520217 | 3.02374635 | 1           | YML003W   |
| YBR245C   | 156.446777 | 146.36843  | 155.853731 | 164.200239 | 152.14076  | 143.00097  | 0.002483273 | 7.2585999  | 0.980811221 | ISW1      |
| YGR215W   | 7.82562693 | 10.4178867 | 7.74729226 | 10.5248983 | 8.47036349 | 7.03706804 | 0.002420609 | 3.14072052 | 1           | RSM27     |
| YGR223C   | 33.8014474 | 41.2110878 | 33.8944036 | 33.3485541 | 37.0089728 | 38.8652749 | 0.002389232 | 5.18918766 | 0.982532237 | HSV2      |
| YLR175W   | 595.997117 | 557.040373 | 601.444088 | 615.647421 | 563.083702 | 578.524465 | 0.002353367 | 9.19331453 | 0.9801951   | CBF5      |
| YBL007C   | 651.697167 | 538.103994 | 640.483177 | 591.877707 | 628.240345 | 612.999643 | 0.002288674 | 9.25425396 | 0.982344465 | SLA1      |
| YBL041W   | 85.6873268 | 120.467607 | 88.004398  | 93.7188976 | 97.1485536 | 103.877454 | 0.002109489 | 6.61905934 | 0.985393531 | PRE7      |
| YDR238C   | 477.429004 | 475.366444 | 434.211521 | 479.947187 | 453.49023  | 455.408055 | 0.001963282 | 8.85414649 | 0.983540195 | SEC26     |
| YAL007C   | 166.771344 | 154.484022 | 142.780175 | 168.856883 | 144.843216 | 130.799081 | 0.001914121 | 7.27515683 | 0.990306952 | ERP2      |
| YLR014C   | 42.8107826 | 43.8011701 | 40.9153873 | 39.9118334 | 44.0458902 | 43.7718544 | 0.001531564 | 5.41485235 | 0.989612444 | PPR1      |
| YGR155W   | 885.282267 | 895.592913 | 857.346835 | 923.885031 | 855.3764   | 861.492073 | 0.001408316 | 9.78129297 | 0.987990906 | CYS4      |
| YEL076C   | 9.79847406 | 8.518493   | 7.32361222 | 9.57884001 | 7.75364043 | 8.26371293 | 0.001330193 | 3.114853   | 1           | YEL076C   |
| YMR278W   | 61.8158766 | 70.9682559 | 62.4625439 | 64.6276057 | 67.1113415 | 63.7855342 | 0.001282651 | 6.02815307 | 0.989179495 | PRM15     |
| YHL029C   | 121.067052 | 117.935082 | 128.85926  | 107.850643 | 126.078103 | 134.349895 | 0.001261864 | 6.94016036 | 0.989931141 | OCA5      |
| YLR444C   | 7.95715007 | 7.30978791 | 8.17097231 | 6.62240791 | 7.62332714 | 9.23211679 | 0.000993764 | 2.9875824  | 1           | YLR444C   |
| YJR136C   | 18.939324  | 24.8647904 | 18.8840249 | 18.0342358 | 22.4790416 | 22.337849  | 0.000982607 | 4.39581797 | 0.994888905 | TTI2      |
| YDR283C   | 144.215125 | 150.627677 | 144.111741 | 157.104802 | 144.061336 | 138.02983  | 0.000943615 | 7.1946945  | 0.993822591 | GCN2      |
| YER183C   | 34.5248247 | 41.5564321 | 36.7996382 | 39.9118334 | 36.1619365 | 36.9284672 | 0.000910082 | 5.23993443 | 0.99662643  | FAU1      |
| YLR418C   | 35.8400561 | 43.0529241 | 36.6180611 | 39.4388042 | 39.7455518 | 36.4765454 | 0.000907452 | 5.27302663 | 0.995315524 | CDC73     |
| YKL108W   | 25.7785358 | 27.800217  | 28.3260373 | 29.1504205 | 26.9748499 | 25.8241029 | 0.000846146 | 4.77845178 | 1           | SLD2      |
| YDR513W   | 81.8073942 | 74.7094859 | 77.8966027 | 85.5000163 | 71.9329331 | 76.9558267 | 0.000826729 | 6.29022357 | 1           | GRX2      |

|           |            |            |            |            |            |            |              |            |             |            |
|-----------|------------|------------|------------|------------|------------|------------|--------------|------------|-------------|------------|
| YDR265W   | 19.1366171 | 25.7857085 | 19.4892821 | 21.3454398 | 20.6546556 | 22.5315298 | 0.000741822  | 4.4351059  | 0.998155929 | PEX10      |
| YDL071C   | 3.02503226 | 2.7051971  | 2.42102883 | 1.95124519 | 3.25783211 | 2.96977183 | 0.000690336  | 1.50254326 | 1           | YDL071C    |
| YML103C   | 334.857919 | 311.90347  | 337.249316 | 314.505247 | 338.03266  | 331.904283 | 0.000635411  | 8.35838302 | 0.995147453 | NUP188     |
| YDL161W   | 61.8816382 | 59.8596805 | 61.6151838 | 63.4450329 | 57.2075319 | 62.6880098 | 0.000426404  | 5.93645601 | 1           | ENT1       |
| YPR196W   | 12.3631753 | 11.9719361 | 10.5314754 | 12.5944007 | 10.0992796 | 12.1373284 | 0.000350411  | 3.55384569 | 1           | YPR196W    |
| YMR274C   | 31.4997924 | 27.7426596 | 35.5891238 | 26.7261462 | 32.1222246 | 36.0246236 | 1.5611E-05   | 4.98736594 | 1           | RCE1       |
| YOR083W   | 28.0144292 | 20.9508882 | 27.9023573 | 23.8879714 | 25.7368737 | 27.1798683 | -0.00018927  | 4.68444497 | 1           | WHI5       |
| YJR092W   | 160.984325 | 150.973021 | 161.543149 | 154.739656 | 162.370353 | 156.300383 | -0.000207337 | 7.30318877 | 0.999511748 | BUD4       |
| YBR198C   | 132.443804 | 123.748378 | 132.369751 | 128.663925 | 132.137671 | 127.635629 | -0.000304001 | 7.01812035 | 0.998506888 | TAF5       |
| YGR172C   | 84.898188  | 72.9827644 | 90.7280555 | 77.3993924 | 83.2701888 | 87.8665101 | -0.000317452 | 6.3744331  | 0.999889377 | YIP1       |
| YJL008C   | 286.786211 | 313.975536 | 294.215529 | 310.721014 | 293.59583  | 290.456597 | -0.000362713 | 8.22123841 | 0.997813119 | CCT8       |
| YML020W   | 40.0487967 | 36.7216117 | 35.3470209 | 34.0580978 | 40.8532147 | 37.1867082 | -0.000433331 | 5.22791053 | 1           | YML020W    |
| YJL206C   | 26.2388668 | 26.303725  | 23.4234539 | 23.119299  | 26.3884401 | 26.4697055 | -0.000632208 | 4.66895116 | 1           | YJL206C    |
| YOR043C   | 1188.44311 | 885.980829 | 1139.51775 | 1046.16306 | 1027.19447 | 1138.97206 | -0.000678047 | 10.0649367 | 0.995361864 | SAH1       |
| YOL063C   | 85.0954727 | 85.3576022 | 79.9544772 | 82.4844556 | 85.1597314 | 82.6371293 | -0.000777005 | 6.38491277 | 0.996131501 | CRT10      |
| YDR060W   | 287.049257 | 295.442058 | 289.010317 | 296.293625 | 298.938675 | 275.801419 | -0.000780404 | 8.18264592 | 0.993877438 | MAK21      |
| YHR196W   | 109.953346 | 126.741362 | 122.322482 | 121.391102 | 119.562439 | 117.95159  | -0.000843647 | 6.90437676 | 0.996324318 | UTP9       |
| YER067C-A | 1.1179467  | 0.57557385 | 0.90788581 | 0.94605827 | 0.84703635 | 0.77472309 | -0.000985322 | -0.0270882 | 1           | YER067C-A  |
| YMR186W   | 3009.84134 | 3376.14354 | 2731.58631 | 3405.57327 | 3021.7696  | 2683.96358 | -0.000986893 | 11.5690445 | 0.993181006 | HSC82      |
| YML031C   | 218.262654 | 282.318974 | 213.353166 | 248.044653 | 238.994564 | 226.477382 | -0.001013588 | 7.89516528 | 0.9942777   | HHT2       |
| YOR340C   | 66.1561403 | 74.9397155 | 65.7309328 | 76.5124628 | 70.5646436 | 59.5891175 | -0.001015616 | 6.10976711 | 0.995128965 | RPA43      |
| YKL195W   | 92.2634839 | 94.0487673 | 99.7463879 | 92.9502252 | 96.6924571 | 96.2593436 | -0.001074257 | 6.57667937 | 0.993967116 | MIA40      |
| YNL023C   | 85.8846116 | 84.436684  | 93.5727643 | 84.3765721 | 93.8255649 | 85.5423409 | -0.00108176  | 6.46039405 | 0.994387426 | FAP1       |
| YDR047W   | 138.362345 | 146.713775 | 138.967055 | 149.595464 | 136.894105 | 137.190547 | -0.001158023 | 7.14386678 | 0.990697427 | HEM12      |
| YJR140C   | 86.5422273 | 87.8901271 | 85.2807406 | 88.692963  | 87.7659971 | 83.0244908 | -0.001178627 | 6.43729595 | 0.991293453 | HIR3       |
| YPR169W   | 96.077655  | 103.488178 | 95.0859074 | 112.107905 | 95.9105774 | 86.317064  | -0.001202064 | 6.61925491 | 0.991512245 | JIP5       |
| YGR192C   | 31126.2667 | 24085.7512 | 29535.4623 | 30060.4103 | 27991.7496 | 26623.9399 | -0.001213116 | 14.785318  | 0.991304162 | TDH3       |
| YHR148W   | 12.3631753 | 17.6701172 | 16.4629961 | 14.1908741 | 17.1361969 | 15.2362207 | -0.001264194 | 3.96781353 | 1           | IMP3       |
| YBR121C   | 1225.0723  | 1324.62566 | 1183.15679 | 1376.51479 | 1214.71528 | 1138.2619  | -0.001283566 | 10.2806157 | 0.990095814 | GRS1       |
| YMR079W   | 216.881661 | 188.327764 | 206.090079 | 191.813315 | 202.050748 | 216.793344 | -0.001422889 | 7.67076725 | 0.98880252  | SEC14      |
| YOR238W   | 20.7148948 | 28.3757909 | 20.820848  | 21.641083  | 23.7170178 | 24.597458  | -0.001438144 | 4.551406   | 1           | YOR238W    |
| YFR031C-A | 1858.02742 | 1759.64438 | 1725.08726 | 1931.14145 | 1725.08726 | 1715.94708 | -0.001518721 | 10.8072051 | 0.987233158 | RPL2A      |
| YLR043C   | 132.969896 | 128.007625 | 127.769797 | 142.559156 | 131.225478 | 114.400776 | -0.001664775 | 7.01814575 | 0.985991575 | TRX1       |
| YGL089C   | 2.56470126 | 2.18718064 | 2.42102883 | 2.71991753 | 2.21532584 | 2.19504875 | -0.001693878 | 1.32694554 | 1           | MF(ALPHA)2 |
| YKR062W   | 35.9715793 | 42.0168912 | 37.8285755 | 35.8319571 | 40.6577448 | 39.3171967 | -0.001839699 | 5.27543141 | 0.998399977 | TFA2       |
| YDL078C   | 161.18161  | 182.054009 | 156.822143 | 181.051902 | 161.197533 | 157.139666 | -0.001909106 | 7.38126085 | 0.985495652 | MDH3       |
| YBR216C   | 42.4162132 | 52.9527943 | 45.8784964 | 49.3724161 | 45.0883964 | 46.677066  | -0.001924076 | 5.5610068  | 0.993089155 | YBP1       |
| YPR066W   | 15.6197307 | 15.0224775 | 14.2840701 | 14.6639032 | 14.7905578 | 15.300781  | -0.002040581 | 3.91173653 | 1           | UBA3       |
| YGR161W-C | 3.35384011 | 2.87786926 | 2.54208027 | 2.77904617 | 3.64877197 | 2.32416926 | -0.002066774 | 1.60317362 | 1           | YGR161W-C  |
| YNR020C   | 17.3610547 | 17.4974451 | 17.4919333 | 17.502078  | 18.8302696 | 15.9463835 | -0.00211247  | 4.13441078 | 1           | ATP23      |
| YOR216C   | 33.0123086 | 33.325726  | 34.6207123 | 35.0041561 | 34.0769239 | 31.6990863 | -0.002248953 | 5.07690368 | 0.987898017 | RUD3       |
| YDR467C   | 2.82774755 | 4.6621482  | 2.60260599 | 3.31120395 | 2.80173562 | 4.00273595 | -0.002294351 | 1.8092611  | 1           | YDR467C    |
| YDL074C   | 93.2499075 | 104.409097 | 99.8069136 | 101.346492 | 99.2335662 | 96.4530244 | -0.002429681 | 6.63254122 | 0.981268753 | BRE1       |
| YIL115W-A | 12.4946985 | 10.359032  | 11.9840927 | 11.4118279 | 10.3590961 | 13.557654  | -0.002509291 | 3.57370569 | 0.987214545 | YIL115W-A  |
| YBR041W   | 242.660196 | 195.46488  | 227.334607 | 230.424318 | 215.798799 | 217.890868 | -0.00258864  | 7.79251143 | 0.9789159   | FAT1       |
| YPL006W   | 160.721279 | 129.907018 | 156.095834 | 138.183636 | 149.339024 | 158.301751 | -0.002722575 | 7.21779686 | 0.979017818 | NCR1       |
| YER016W   | 50.7679327 | 45.8156786 | 42.065376  | 47.5985568 | 46.3915293 | 44.2883365 | -0.002791963 | 5.532067   | 0.978270764 | BIM1       |
| YJR113C   | 55.9630968 | 53.2405813 | 55.0784059 | 59.6607998 | 51.6692173 | 52.4874892 | -0.003021627 | 5.77645873 | 0.973893534 | RSM7       |
| YBR080C   | 194.193919 | 195.004421 | 185.289231 | 190.394227 | 192.081781 | 190.77556  | -0.003058744 | 7.58051965 | 0.972972864 | SEC18      |
| YPL164C   | 23.6741655 | 32.5199226 | 29.8997061 | 27.5612597 | 29.1812363 | 27.5612597 | -0.003114274 | 4.84960098 | 0.992380943 | MLH3       |
| YEL026W   | 261.270721 | 239.093378 | 265.828966 | 250.882828 | 263.363148 | 250.235557 | -0.003159929 | 7.9956422  | 0.972779585 | SNU13      |
| YDR390C   | 90.5536831 | 107.574753 | 90.2438497 | 91.9450383 | 98.8426263 | 97.0986269 | -0.003166987 | 6.58759204 | 0.978521964 | UBA2       |
| YLR320W   | 78.3220309 | 69.1264196 | 77.8966027 | 77.1628778 | 76.1681148 | 71.4036445 | -0.003195085 | 6.23134396 | 0.971166297 | MMS22      |
| YNL292W   | 57.0810435 | 52.2045483 | 54.8968288 | 54.339222  | 54.7315795 | 54.6825379 | -0.003222668 | 5.77538761 | 0.972699141 | PUS4       |
| YFL054C   | 24.5948275 | 24.0014296 | 26.9944715 | 24.7157724 | 24.7595241 | 25.9532234 | -0.003235009 | 4.66062044 | 0.985745103 | YFL054C    |
| YGR201C   | 23.0823114 | 20.3753143 | 20.5787451 | 22.2323694 | 22.5441982 | 19.0452759 | -0.003265585 | 4.42144733 | 0.98293055  | YGR201C    |
| YER116C   | 15.8485386 | 14.2742315 | 16.0998417 | 14.7230319 | 14.4647746 | 16.9147874 | -0.003344123 | 3.95453294 | 0.988742157 | SLX8       |
| YCL063W   | 60.1718373 | 61.0683856 | 62.7046467 | 57.1773968 | 64.3747626 | 62.0424072 | -0.003441058 | 5.93957688 | 0.975957765 | VAC17      |
| YJR010W   | 43.0080673 | 42.0168912 | 37.3443697 | 42.0404645 | 42.1563475 | 37.8323108 | -0.003441375 | 5.35249461 | 0.97618836  | MET3       |
| YGL161C   | 100.352157 | 91.8040293 | 89.8806954 | 97.0892302 | 93.6300949 | 90.5134807 | -0.003503757 | 6.55455581 | 0.967021844 | YIP5       |
| YNL251C   | 180.581274 | 163.290302 | 185.632386 | 167.570571 | 176.053247 | 184.577776 | -0.003515917 | 7.46267396 | 0.970602397 | NRD1       |
| YDR017C   | 151.711944 | 144.123692 | 155.187948 | 142.500027 | 156.180472 | 151.264683 | -0.003531331 | 7.23147167 | 0.968944827 | KCS1       |
| YML082W   | 63.3941543 | 58.7085328 | 66.0940871 | 62.26246   | 61.8336535 | 63.5918534 | -0.003577006 | 5.9719221  | 0.969764104 | YML082W    |
| YBR215W   | 39.0623731 | 38.9087924 | 38.6154099 | 38.0197168 | 40.071335  | 38.2196723 | -0.003624675 | 5.28309274 | 0.97619911  | HPC2       |
| YPR019W   | 174.728494 | 154.253792 | 174.737756 | 167.747957 | 165.302401 | 169.276995 | -0.003754632 | 7.39051065 | 0.966707715 | MCM4       |
| YKR016W   | 60.2375989 | 73.7310104 | 68.938796  | 68.2935815 | 69.2615107 | 64.9476188 | -0.003760758 | 6.08127871 | 0.975616875 | MIC60      |
| YLR270W   | 58.5277981 | 68.0328292 | 53.0205314 | 63.4450329 | 55.6437725 | 60.0410393 | -0.003777461 | 5.9051115  | 0.975421782 | DCS1       |
| YCR093W   | 416.796836 | 383.907759 | 400.861849 | 372.451316 | 412.540044 |            | -0.003883434 | 8.64419594 | 0.966953798 | CDC39      |
| YDR142C   | 29.0008528 | 28.7211352 | 28.8102431 | 28.3226195 | 28.2128261 | 29.7622786 | -0.003986357 | 4.85435074 | 0.977113844 | PEX7       |
| YIR022W   | 80.4921627 | 66.0183208 | 70.3914133 | 80.1193099 | 71.0207401 | 64.9476188 | -0.004150405 | 6.17561461 | 0.966242097 | SEC11      |
| YHR086W   | 100.154872 | 80.4652244 | 95.6306389 | 81.8931692 | 95.8454208 | 97.6796692 | -0.004204854 | 6.52420012 | 0.969475486 | NAM8       |
| YFR006W   | 208.201133 | 241.625903 | 208.571634 | 232.907721 | 212.47581  | 211.112041 | -0.004242022 | 7.7767101  | 0.96623577  | YFR006W    |
| YDL101C   | 28.1459523 | 32.6350374 | 30.4444376 | 31.2790516 | 29.6462722 | 30.0850799 | -0.004243213 | 4.93120372 | 0.978487941 | DUN1       |

|           |            |            |             |            |            |            |              |            |             |           |
|-----------|------------|------------|-------------|------------|------------|------------|--------------|------------|-------------|-----------|
| YFR035C   | 9.4696662  | 10.1300998 | 9.92621821  | 8.92842494 | 9.44771313 | 11.1043642 | -0.00432135  | 3.31558763 | 1           | YFR035C   |
| YPR204W   | 435.80193  | 348.740197 | 433.061532  | 426.613152 | 401.951326 | 385.231055 | -0.004354656 | 8.66301246 | 0.96689257  | YPR204W   |
| YIL137C   | 200.243983 | 176.183156 | 198.948044  | 188.502111 | 194.883517 | 190.129958 | -0.004506967 | 7.58191187 | 0.961003306 | TMA108    |
| YMR138W   | 6.70768023 | 9.38185378 | 8.47360091  | 8.51452445 | 8.07942364 | 7.94091164 | -0.004738591 | 3.05730957 | 1           | CIN4      |
| YGR159C   | 528.065414 | 593.416641 | 595.149413  | 522.992839 | 552.528326 | 635.595733 | -0.004747378 | 9.15840026 | 0.963853124 | NSR1      |
| YDL015C   | 363.79301  | 279.786449 | 356.496495  | 296.825783 | 339.531263 | 360.375356 | -0.004777616 | 8.37891664 | 0.967594542 | TSC13     |
| YGR116W   | 410.549487 | 393.865187 | 389.361962  | 393.087212 | 409.314027 | 387.361544 | -0.004830824 | 8.63435762 | 0.956693595 | SPT6      |
| YOR177C   | 2.36741655 | 3.33832834 | 3.32891464  | 3.25207531 | 3.3881454  | 2.38872952 | -0.004903806 | 1.65303864 | 1           | MPC54     |
| YGR016W   | 3.35384011 | 5.12260728 | 3.26838892  | 4.0798763  | 4.56096496 | 3.09889235 | -0.005006432 | 2.01822131 | 1           | YGR016W   |
| YGR200C   | 186.171007 | 196.385798 | 197.73753   | 208.13282  | 184.328141 | 185.73986  | -0.005122334 | 7.5941065  | 0.95611565  | ELP2      |
| YML080W   | 39.1938962 | 45.2401047 | 39.2206671  | 41.5083067 | 39.7455518 | 42.0287275 | -0.00513866  | 5.36776531 | 0.967463501 | DUS1      |
| YGR179C   | 15.6512539 | 16.5765269 | 16.7050989  | 19.5124519 | 14.9208711 | 14.2678169 | -0.005222961 | 4.0370548  | 0.980528736 | OKP1      |
| YKR050W   | 89.6330211 | 69.1264196 | 90.7280555  | 72.7282297 | 86.2022377 | 89.6096371 | -0.005354558 | 6.37673896 | 0.964806738 | TRK2      |
| YOR126C   | 24.2660196 | 26.4763972 | 24.3918655  | 24.8931583 | 24.6292108 | 25.3721811 | -0.005377526 | 4.65157285 | 0.972209432 | IAH1      |
| YPL116W   | 80.0318317 | 78.2780438 | 77.4729226  | 78.3454507 | 82.683779  | 73.8569343 | -0.00540127  | 6.29583796 | 0.951487133 | HOS3      |
| YBR060C   | 55.5685274 | 60.9532709 | 56.7126004  | 59.2468993 | 56.8165921 | 56.5547854 | -0.005439113 | 5.85239946 | 0.955958129 | ORC2      |
| YFL046W   | 13.4153605 | 13.6986577 | 12.5893499  | 13.7178449 | 13.8783648 | 11.9436476 | -0.005549846 | 3.73706469 | 0.987159789 | FMP32     |
| YPL264C   | 13.2838373 | 13.3533134 | 14.6472244  | 13.0083012 | 13.5525816 | 14.5906181 | -0.005588847 | 3.79294268 | 0.974740448 | YPL264C   |
| YKL014C   | 225.496427 | 227.006327 | 242.70814   | 207.778048 | 244.467722 | 240.357838 | -0.005629836 | 7.85434669 | 0.954900331 | URB1      |
| YMR282C   | 43.9287293 | 54.2766142 | 45.9995478  | 48.6037437 | 47.173409  | 47.9682711 | -0.005640775 | 5.58893987 | 0.964105615 | AEP2      |
| YKR057W   | 162.496842 | 156.958989 | 163.177343  | 177.681569 | 162.109726 | 140.805921 | -0.005784383 | 7.32797212 | 0.952742261 | RPS21A    |
| YBL049W   | 3.87993268 | 3.33832834 | 3.93417185  | 4.31639087 | 3.77908525 | 2.96977183 | -0.00579189  | 1.93712129 | 1           | MOH1      |
| YFL018C   | 262.717476 | 271.958645 | 254.147502  | 295.406695 | 253.915435 | 236.225981 | -0.005850357 | 8.03637222 | 0.954028412 | LPD1      |
| YKL068W-A | 5.65549509 | 5.98596805 | 5.8104692   | 6.03112149 | 5.53831459 | 5.81042315 | -0.005888237 | 2.56890311 | 1           | YKL068W-A |
| YLR007W   | 32.3546929 | 36.606497  | 35.8312267  | 32.8163963 | 34.8588036 | 36.7993466 | -0.005929741 | 5.12951208 | 0.966431498 | NSE1      |
| YKL087C   | 25.6470126 | 32.2896931 | 25.64813285 | 31.5746948 | 26.6490667 | 24.855699  | -0.006002199 | 4.80225181 | 0.97073037  | CYT2      |
| YDL149W   | 35.8400561 | 34.5344311 | 35.8312267  | 35.3589279 | 35.9664665 | 34.4106171 | -0.006088415 | 5.14752691 | 0.954467189 | ATG9      |
| YGL190C   | 107.388645 | 108.725901 | 111.427852  | 100.696077 | 105.74923  | 119.759277 | -0.006262344 | 6.76918699 | 0.947789365 | CDC55     |
| YNR014W   | 19.3339018 | 17.785232  | 24.0287112  | 19.6307091 | 21.4365353 | 19.819999  | -0.00632274  | 4.3546069  | 0.972116019 | YNR014W   |
| YNL073W   | 63.4599159 | 68.2630588 | 63.3704297  | 67.7614237 | 63.8535094 | 62.6234495 | -0.006353025 | 6.02287401 | 0.945251541 | MSK1      |
| YIL156W-B | 5.52397195 | 4.83482035 | 4.78153194  | 5.61722099 | 4.56096496 | 4.84201929 | -0.00656434  | 2.36501496 | 0.964806738 | YIL156W-B |
| YKL135C   | 103.048382 | 115.805459 | 104.346343  | 111.417858 | 113.561493 | 113.561493 | -0.006587225 | 6.75003594 | 0.948551797 | APL2      |
| YNL033W   | 3.22231697 | 4.48947604 | 4.3578519   | 4.13900494 | 3.45330204 | 4.45465775 | -0.006733946 | 2.05481583 | 1           | YNL033W   |
| YJR080C   | 65.893094  | 78.4507159 | 66.6993443  | 69.0622539 | 69.4569807 | 71.6618856 | -0.006740991 | 6.13626508 | 0.94892048  | AIM24     |
| YJL013C   | 22.6877419 | 25.2676921 | 23.6050311  | 25.1296729 | 22.0881017 | 24.0164157 | -0.006742825 | 4.58109273 | 0.962509239 | MAD3      |
| YML133C   | 173.676309 | 145.159725 | 158.093183  | 167.807086 | 162.240039 | 144.485856 | -0.006793825 | 7.31009021 | 0.943792439 | YML133C   |
| YGL098W   | 13.5468836 | 16.6340843 | 14.949853   | 15.196061  | 15.5072809 | 14.2678169 | -0.006897113 | 3.92156562 | 0.977219398 | USE1      |
| YNL206C   | 60.0403142 | 66.4787798 | 59.5573093  | 62.7354892 | 65.3521122 | 57.1358277 | -0.007052116 | 5.95455846 | 0.944463204 | RTT106    |
| YGR225W   | 2.89350912 | 2.93542664 | 2.66313171  | 3.42946124 | 2.01985591 | 2.96977183 | -0.007066291 | 1.56075282 | 1           | AMA1      |
| YNL299W   | 52.4777336 | 47.2546132 | 57.5599605  | 48.722001  | 54.7315795 | 53.0685315 | -0.007195487 | 5.71187683 | 0.947362969 | TRF5      |
| YLL006W   | 47.0195232 | 40.4628418 | 42.912736   | 45.1742825 | 41.1138413 | 43.3199326 | -0.007243675 | 5.44133728 | 0.940044598 | MMM1      |
| YJL187C   | 83.6487181 | 88.6383731 | 84.3123291  | 80.3558245 | 89.1994433 | 85.8651422 | -0.007271144 | 6.41715449 | 0.936875879 | SWE1      |
| YDL141W   | 111.860432 | 93.7609804 | 115.906755  | 100.932592 | 113.242244 | 105.685141 | -0.00732221  | 6.74151929 | 0.941246186 | BPL1      |
| YPL068C   | 20.7806564 | 26.7066267 | 23.6655568  | 20.2811242 | 24.3685842 | 26.2760247 | -0.007363417 | 4.57334643 | 0.972409516 | YPL068C   |
| YNL165W   | 19.8599944 | 26.1310529 | 23.1813511  | 19.9263524 | 22.4790416 | 26.5342657 | -0.007484929 | 4.53289414 | 0.972703946 | YNL165W   |
| YIL026C   | 90.2906368 | 89.962193  | 85.7044206  | 89.6981499 | 86.7886475 | 88.0601909 | -0.00748905  | 6.46829789 | 0.928256701 | IRR1      |
| YMR283C   | 19.5311865 | 22.6776097 | 18.7629734  | 20.0446096 | 20.394029  | 20.2719208 | -0.007510431 | 4.35134794 | 0.965161589 | RIT1      |
| YOR390W   | 32.6835007 | 29.2391517 | 33.9549294  | 28.6773914 | 31.0797184 | 35.637262  | -0.00752353  | 4.99944237 | 0.95522711  | FEX1      |
| YPR162C   | 24.0687349 | 29.3542664 | 26.2076371  | 24.5975151 | 27.4309464 | 27.3089888 | -0.007535384 | 4.73472663 | 0.963918239 | ORC4      |
| YER083C   | 145.661879 | 116.208361 | 135.759192  | 128.163115 | 142.549048 | 142.549048 | -0.007749509 | 7.04739616 | 0.938471735 | GET2      |
| YMR071C   | 50.8994559 | 65.0974026 | 56.9547033  | 61.6711736 | 59.0319179 | 51.3899648 | -0.007775257 | 5.84943245 | 0.948683627 | TVP18     |
| YMR039C   | 29.8557532 | 30.5054141 | 28.8707688  | 30.8651511 | 30.0372121 | 27.8254709 | -0.007807904 | 4.89670022 | 0.945945885 | SUB1      |
| YPL150W   | 75.2312371 | 67.9177145 | 65.3072527  | 75.7437904 | 63.5277262 | 67.8528304 | -0.008120746 | 6.11663473 | 0.931456854 | YPL150W   |
| YIL036W   | 63.4599159 | 71.6589445 | 68.1519616  | 65.2188921 | 67.567438  | 69.4668368 | -0.008138752 | 6.08145944 | 0.933243243 | CST6      |
| YMR122C   | 2.76198598 | 2.64763972 | 3.14733748  | 2.30601704 | 3.45330204 | 2.77609106 | -0.008165556 | 1.56846427 | 1           | YMR122C   |
| YGR015C   | 22.5562188 | 24.0014296 | 21.668208   | 22.468884  | 22.0881017 | 23.3062529 | -0.008223349 | 4.511504   | 0.953174382 | YGR015C   |
| YPR113W   | 268.701779 | 228.215032 | 265.102657  | 255.553991 | 250.071193 | 251.914124 | -0.008307489 | 7.9851188  | 0.930057923 | PIS1      |
| YNL334C   | 4.80059467 | 5.29527943 | 4.53942906  | 5.2033205  | 5.66862788 | 3.67993466 | -0.008368154 | 2.32012766 | 1           | SNO2      |
| YLR216C   | 192.484118 | 243.064837 | 189.869186  | 222.560209 | 200.617302 | 198.651912 | -0.008429374 | 7.70061664 | 0.939829273 | CPR6      |
| YOR194C   | 38.3389958 | 40.0023827 | 40.9153873  | 39.2022897 | 40.9183713 | 38.4779133 | -0.008504835 | 5.31357715 | 0.935905866 | TOA1      |
| YDR422C   | 97.5244096 | 90.2499799 | 94.4201244  | 90.2894364 | 93.6300949 | 96.5821449 | -0.008549053 | 6.55300891 | 0.919568016 | SIP1      |
| YFR036W-A | 34.8536326 | 28.1455613 | 24.1497626  | 39.143161  | 25.8020303 | 21.5631259 | -0.008661736 | 4.8620218  | 0.964136241 | YFR036W-A |
| YJR001W   | 278.368729 | 221.135474 | 259.957971  | 249.641127 | 257.629364 | 247.524026 | -0.008674046 | 7.9800292  | 0.931230992 | AVT1      |
| YEL042W   | 408.839686 | 339.4159   | 411.817004  | 402.015637 | 382.07855  | 368.83275  | -0.008756428 | 8.59101928 | 0.930479502 | GDA1      |
| YDR095C   | 0.98642356 | 0.74824601 | 0.60525721  | 1.18257284 | 0.65156642 | 0.4519218  | -0.008978522 | -0.1553331 | 1           | YDR095C   |
| YPR045C   | 44.3890603 | 50.9382859 | 47.9363709  | 49.549802  | 45.349023  | 47.5163493 | -0.009048091 | 5.5775005  | 0.930345724 | THP3      |
| YAR007C   | 96.998317  | 107.517195 | 101.017428  | 105.603755 | 95.9105774 | 102.134327 | -0.009057926 | 6.66771903 | 0.918184234 | RFA1      |
| YLL028W   | 229.83669  | 174.686664 | 214.079474  | 209.978254 | 203.74482  | 209.885396 | -0.0090684   | 7.68394803 | 0.931612252 | TPO1      |
| YIL002W-A | 1.90708556 | 1.5540494  | 0.96841153  | 1.8329879  | 1.36828949 | 1.16208463 | -0.009069948 | 0.66894006 | 1           | YIL002W-A |
| YJL202C   | 2.23589341 | 2.30229541 | 1.21051442  | 2.06950247 | 1.56375941 | 2.06592823 | -0.00907698  | 1.02397932 | 1           | YJL202C   |
| YGL154C   | 20.1888023 | 23.4258558 | 20.5787451  | 21.2863111 | 22.2835717 | 20.2719208 | -0.009232764 | 4.42437643 | 0.952297471 | LYS5      |
| YLR063W   | 40.7064124 | 41.9017764 | 40.9153873  | 31.3381803 | 44.5671433 | 46.935307  | -0.009347317 | 5.36329043 | 0.952095772 | BMT6      |
| YDR475C   | 70.6936887 | 71.140928  | 65.0046241  | 71.9595573 | 67.2416548 | 66.238824  | -0.009369272 | 6.10521983 | 0.915655438 | JIP4      |

|           |            |            |            |            |            |            |              |            |             |           |
|-----------|------------|------------|------------|------------|------------|------------|--------------|------------|-------------|-----------|
| YKL192C   | 117.64745  | 89.6168487 | 98.8385021 | 103.061223 | 94.6074446 | 106.266183 | -0.009459192 | 6.6692664  | 0.926312269 | ACP1      |
| YGL250W   | 15.5197307 | 14.9649201 | 14.2235444 | 15.196061  | 15.7027508 | 13.4930938 | -0.009476807 | 3.90428265 | 0.952849197 | RMR1      |
| YNL330C   | 99.299972  | 95.3725872 | 96.7806276 | 101.109978 | 92.9133719 | 95.4200602 | -0.009513329 | 6.59905704 | 0.907997897 | RPD3      |
| YPL188W   | 49.0581319 | 53.355696  | 50.1152968 | 46.9481418 | 52.5814103 | 52.1001276 | -0.009691761 | 5.6672079  | 0.926086883 | POS5      |
| YKL103C   | 114.753941 | 110.970639 | 100.775325 | 116.365167 | 107.11752  | 100.714001 | -0.009721114 | 6.76258119 | 0.914381177 | APE1      |
| YMR156C   | 7.62834222 | 10.1876572 | 8.29202375 | 8.04149531 | 8.66583342 | 9.29667705 | -0.009856025 | 3.14043176 | 0.983907996 | TPP1      |
| YLR373C   | 87.0025583 | 88.5808157 | 91.3333127 | 84.6722154 | 89.3297565 | 91.1590833 | -0.009903422 | 6.47250858 | 0.908311456 | VID22     |
| YML056C   | 859.109162 | 682.342801 | 798.939514 | 733.017775 | 761.094738 | 830.115788 | -0.009951156 | 9.60276547 | 0.9255307   | IMD4      |
| YDL028C   | 46.9537616 | 54.5644011 | 52.1731713 | 50.0819598 | 50.5615544 | 52.1001276 | -0.010012318 | 5.67826009 | 0.92345714  | MPS1      |
| YOL105C   | 59.3169369 | 56.3486801 | 65.0046241 | 59.4834139 | 57.3378452 | 62.5588893 | -0.010186852 | 5.91002269 | 0.914223958 | WSC3      |
| YOL115W   | 61.289784  | 61.5864021 | 62.5230696 | 62.9720037 | 61.0517738 | 60.0410393 | -0.010237027 | 5.94731331 | 0.904935106 | PAP2      |
| YBR110W   | 113.570233 | 103.833523 | 112.638366 | 110.215789 | 109.398002 | 108.00931  | -0.010263373 | 6.77780654 | 0.90132357  | ALG1      |
| YNR057C   | 12.4946985 | 12.8928543 | 13.10303   | 14.6639032 | 12.1191355 | 11.298045  | -0.010345751 | 3.68753965 | 0.950243751 | BIO4      |
| YMR116C   | 4417.92809 | 3588.76052 | 4586.94175 | 4039.43231 | 4113.27367 | 4350.65118 | -0.010371291 | 12.0303003 | 0.923619321 | ASC1      |
| YHR016C   | 78.2562693 | 73.9036825 | 69.9677332 | 78.7593512 | 70.6298002 | 71.016283  | -0.010388731 | 6.20714808 | 0.905824137 | YSC84     |
| YPR191W   | 232.401391 | 244.791559 | 227.031979 | 259.92951  | 226.549645 | 212.532367 | -0.010581018 | 7.87044953 | 0.914610886 | QCR2      |
| YFR018C   | 95.4858009 | 68.2055014 | 86.3096779 | 80.8288536 | 84.4430084 | 82.7662498 | -0.010597273 | 6.37682786 | 0.923073572 | YFR018C   |
| YKL191W   | 183.34326  | 164.268777 | 202.882216 | 157.63696  | 191.234745 | 197.618947 | -0.010668083 | 7.51517501 | 0.924508374 | DPH2      |
| YGL025C   | 36.2346255 | 38.2756611 | 38.0101527 | 33.0529109 | 40.3319616 | 38.4133531 | -0.010769827 | 5.22894469 | 0.929603474 | PGD1      |
| YDL093W   | 129.221487 | 101.300998 | 120.990916 | 108.737573 | 117.868366 | 122.212567 | -0.010771771 | 6.868149   | 0.914811591 | PMT5      |
| YOL130W   | 155.263069 | 163.808318 | 165.356269 | 158.878661 | 160.67628  | 161.206962 | -0.011132111 | 7.33085538 | 0.896366917 | ALR1      |
| YLR179C   | 227.73232  | 194.601519 | 192.834946 | 232.671206 | 199.900578 | 177.669828 | -0.011204361 | 7.67497223 | 0.919931186 | YLR179C   |
| YDL144C   | 83.3199103 | 75.2850598 | 78.1992313 | 80.2966959 | 77.6015609 | 76.9558267 | -0.011221363 | 6.29881428 | 0.892561006 | YDL144C   |
| YLR425W   | 70.036073  | 67.9177145 | 62.0388638 | 66.3423363 | 67.0461849 | 65.0121791 | -0.011237733 | 6.05570317 | 0.898984667 | TUS1      |
| YFR026C   | 3.68264797 | 4.6621482  | 3.32891464 | 4.13900494 | 3.64877197 | 3.80905518 | -0.01127017  | 2.00416101 | 1           | ULI1      |
| YLR309C   | 84.1748107 | 91.6313571 | 82.8597118 | 94.4284413 | 84.8991049 | 77.2786279 | -0.011301744 | 6.42659935 | 0.906075868 | IMH1      |
| YEL009C   | 1205.34383 | 1027.62955 | 1112.22065 | 1182.86848 | 1096.91207 | 1039.1619  | -0.011303591 | 10.1173932 | 0.909756991 | GCN4      |
| YOL082W   | 48.3347546 | 52.4347779 | 41.0364387 | 51.855819  | 44.3065167 | 44.4820173 | -0.011399384 | 5.56114598 | 0.920791331 | ATG19     |
| YER057C   | 84.898188  | 64.2915992 | 79.6518486 | 74.0881884 | 72.3238729 | 80.5066408 | -0.011402561 | 6.24911074 | 0.91373262  | HMF1      |
| YOR244W   | 23.7399271 | 29.4693812 | 28.5681402 | 28.086105  | 26.1278135 | 26.9861875 | -0.011442192 | 4.77113449 | 0.933846668 | ESA1      |
| YML009W-B | 23.6741655 | 24.807233  | 29.9602318 | 26.7852748 | 26.5187534 | 24.5328978 | -0.01145628  | 4.71032203 | 0.933295664 | YML009W-B |
| YBR200W   | 61.6185919 | 66.0758781 | 59.1336292 | 61.0207586 | 59.2273878 | 65.1412996 | -0.011543741 | 5.95801128 | 0.90158719  | BEM1      |
| YBL029C-A | 7.16801122 | 8.34582085 | 6.53677785 | 7.80498075 | 6.84144744 | 7.23074881 | -0.011748813 | 2.89824417 | 0.962241448 | YBL029C-A |
| YDR214W   | 196.232527 | 205.479865 | 189.324455 | 208.842364 | 194.81836  | 182.511847 | -0.011829249 | 7.61718436 | 0.898204765 | AHA1      |
| YBR026C   | 101.73315  | 123.978608 | 112.335738 | 111.812262 | 109.202532 | 114.400776 | -0.011844534 | 6.81229741 | 0.901013016 | ETR1      |
| YBR115C   | 281.919854 | 246.575838 | 275.39203  | 267.084076 | 273.723054 | 256.304221 | -0.012061005 | 8.06041036 | 0.896622061 | LYS2      |
| YLR004C   | 10.3245666 | 10.7056736 | 9.74464105 | 10.3475124 | 9.83865298 | 10.3296412 | -0.01214693  | 3.37041684 | 0.952722131 | THI73     |
| YHR123W   | 104.626659 | 83.2855363 | 96.5990504 | 92.1224243 | 91.0889859 | 98.7771936 | -0.012228357 | 6.56257116 | 0.898795479 | EPT1      |
| YHR113W   | 159.406048 | 137.101691 | 136.667078 | 153.143183 | 142.171793 | 134.027094 | -0.012253557 | 7.16863038 | 0.895542167 | APE4      |
| YPL097W   | 26.0415821 | 33.0379391 | 28.6891917 | 30.1556074 | 28.7340792 | 28.2128324 | -0.012258212 | 4.87228704 | 0.926830166 | MSY1      |
| YHL032C   | 112.452286 | 102.164359 | 117.480424 | 109.979274 | 112.069425 | 107.170027 | -0.012299583 | 6.78577802 | 0.886925802 | GUT1      |
| YOR246C   | 158.353863 | 156.210743 | 162.632612 | 162.603766 | 157.548761 | 152.943249 | -0.012329433 | 7.30842321 | 0.882852237 | ENV9      |
| YDL185W   | 1705.46058 | 1330.49651 | 1712.27264 | 1588.01794 | 1578.94091 | 1540.60142 | -0.012377152 | 10.6221174 | 0.910233323 | VMA1      |
| YGL172W   | 98.7738794 | 102.337031 | 98.8990278 | 93.3049971 | 101.253422 | 102.97361  | -0.012423473 | 6.63967691 | 0.885804464 | NUP49     |
| YNL159C   | 27.1595288 | 29.6420533 | 30.3233861 | 26.4896316 | 28.4734527 | 31.5054055 | -0.01245694  | 4.86076148 | 0.923887315 | ASI2      |
| YBR089C-A | 27.7513829 | 23.8863148 | 25.0576484 | 31.3381803 | 23.5867045 | 20.9820836 | -0.012481171 | 4.67632488 | 0.93201317  | NHP6B     |
| YGR239C   | 17.4268163 | 16.5189695 | 14.4051215 | 16.4377625 | 15.5072809 | 15.9463835 | -0.012560881 | 4.01455612 | 0.933658786 | PEX21     |
| YLR287C   | 45.6385302 | 52.2621057 | 45.1521877 | 42.5134936 | 49.6493614 | 49.7759583 | -0.012751943 | 5.57354708 | 0.911230431 | YLR287C   |
| YER071C   | 9.73271249 | 13.4684281 | 8.95780668 | 12.4170148 | 11.1417858 | 8.32827319 | -0.012773726 | 3.43623374 | 0.92320523  | TD2A      |
| YLL035W   | 50.1760786 | 51.4563023 | 53.6257886 | 45.0560252 | 53.1026634 | 55.8446225 | -0.012783702 | 5.69091871 | 0.907091394 | GRC3      |
| YLR305C   | 332.885072 | 279.441105 | 321.815257 | 288.843416 | 321.091933 | 315.893339 | -0.012830523 | 8.27657991 | 0.896421019 | STT4      |
| YAL043C   | 154.868499 | 142.684758 | 165.719424 | 145.752103 | 155.398592 | 157.97895  | -0.01297499  | 7.26536002 | 0.885709016 | PTA1      |
| YGL134W   | 28.2117139 | 30.6205289 | 33.168095  | 29.6825783 | 31.5358149 | 30.0205196 | -0.013069748 | 4.93868874 | 0.913609231 | PCL10     |
| YBL060W   | 33.8014474 | 33.2681686 | 35.770701  | 33.1711682 | 35.4452134 | 33.3130927 | -0.01310938  | 5.09801777 | 0.902366964 | YEL1      |
| YOR170W   | 4.66907153 | 5.75573851 | 3.93417185 | 5.97199284 | 3.97455518 | 4.26097698 | -0.01314964  | 2.29369963 | 0.955983078 | YOR170W   |
| YDR425W   | 32.1574082 | 35.2251197 | 30.4444376 | 27.1400467 | 33.9466106 | 35.9600633 | -0.0132312   | 5.02650175 | 0.925328057 | SNX41     |
| YNL007C   | 300.924948 | 310.176749 | 286.831391 | 331.002138 | 297.635542 | 261.01712  | -0.01324257  | 8.21950807 | 0.896858507 | SIS1      |
| YFR056C   | 3.09079383 | 3.28077095 | 2.72365744 | 3.6659758  | 3.45330204 | 1.87224746 | -0.01337021  | 1.65351252 | 0.970078555 | YFR056C   |
| YML035C   | 133.56175  | 129.734346 | 130.009248 | 122.573675 | 132.789237 | 134.349895 | -0.013383083 | 7.02921468 | 0.873937829 | AMD1      |
| YIL166C   | 12.7577447 | 13.1806412 | 12.2867213 | 10.8205415 | 13.3571117 | 13.7513348 | -0.013385782 | 3.6788873  | 0.949799873 | YIL166C   |
| YNL247W   | 434.223652 | 393.001826 | 414.601187 | 423.479334 | 400.32241  | 406.406819 | -0.013440817 | 8.68694043 | 0.881264664 | YNL247W   |
| YOR215C   | 12.2316522 | 15.7131661 | 12.8919785 | 12.712658  | 14.3344613 | 13.4930938 | -0.013463505 | 3.77563709 | 0.941524754 | AIM41     |
| YBL056W   | 251.406485 | 269.483677 | 251.423844 | 292.391135 | 253.589652 | 219.052953 | -0.013543675 | 8.00208722 | 0.901123719 | PTC3      |
| YOR321W   | 112.057717 | 94.6818986 | 111.851532 | 104.657696 | 102.426242 | 108.396672 | -0.01368922  | 6.72506891 | 0.879869618 | PMT3      |
| YPR120C   | 30.3818457 | 38.7361202 | 33.168095  | 32.875525  | 35.3149001 | 33.2485325 | -0.013765026 | 5.09136973 | 0.915375542 | CLB5      |
| YPL201C   | 8.3517195  | 8.46093562 | 8.95780668 | 8.10062396 | 8.66583342 | 8.78019499 | -0.013822539 | 3.11687224 | 0.963562231 | YIG1      |
| YPL157W   | 43.5999215 | 40.6930713 | 41.5811702 | 45.2334111 | 38.6378889 | 40.6729621 | -0.013952783 | 5.38766668 | 0.887221794 | TGS1      |
| YNL113W   | 14.7963534 | 19.7421831 | 15.9182646 | 16.1421193 | 16.3543172 | 17.56039   | -0.013969385 | 4.07815471 | 0.941159112 | RPC19     |
| YJR091C   | 155.789161 | 150.224775 | 160.453686 | 139.011437 | 158.91705  | 164.112174 | -0.013988254 | 7.27484424 | 0.879948787 | JSN1      |
| YKR089C   | 169.467568 | 167.72222  | 161.24052  | 169.580945 | 164.650835 | 159.334715 | -0.014008781 | 7.37032954 | 0.869202931 | TGL4      |
| YMR092C   | 230.691591 | 235.870164 | 237.321351 | 223.328881 | 223.291813 | 250.364678 | -0.01430907  | 7.86790106 | 0.875714705 | AIP1      |
| YPL263C   | 149.607574 | 157.82235  | 158.637914 | 164.791525 | 152.987796 | 143.646572 | -0.014352896 | 7.27350964 | 0.870680099 | KEL3      |
| YDR226W   | 457.832056 | 535.053452 | 453.761329 | 545.343465 | 456.096496 | 430.552356 | -0.014664263 | 8.90666929 | 0.895338857 | ADK1      |

|           |            |            |            |            |            |            |              |            |             |         |
|-----------|------------|------------|------------|------------|------------|------------|--------------|------------|-------------|---------|
| YCR081W   | 73.5871978 | 84.2064545 | 75.8387282 | 73.2012588 | 80.859393  | 77.3431882 | -0.014752298 | 6.27863099 | 0.874674673 | SRB8    |
| YMR149W   | 271.924096 | 221.423261 | 250.152804 | 208.842364 | 248.37712  | 278.706631 | -0.014771293 | 7.94639071 | 0.899817056 | SWP1    |
| YNL312W   | 90.7509678 | 99.7469485 | 89.4570153 | 101.87865  | 88.2220936 | 86.9626665 | -0.014771947 | 6.53883244 | 0.874512417 | RFA2    |
| YJR088C   | 55.5027658 | 65.15496   | 58.528372  | 59.4242852 | 58.5106648 | 59.5245572 | -0.01480315  | 5.89670434 | 0.877727099 | EMC2    |
| YHR026W   | 274.028466 | 219.351195 | 263.65004  | 256.322663 | 245.314758 | 247.524026 | -0.014812635 | 7.97236015 | 0.882820491 | VMA16   |
| YLL013C   | 111.202816 | 108.092769 | 114.030458 | 98.3309317 | 115.978823 | 115.691981 | -0.014853416 | 6.79006007 | 0.872892055 | PUF3    |
| YPL053C   | 107.125599 | 115.345    | 108.583143 | 115.123466 | 105.423447 | 107.105467 | -0.014872296 | 6.78031788 | 0.860980872 | KTR6    |
| YGL044C   | 24.0029734 | 25.9583807 | 22.9392482 | 23.5331995 | 26.2581268 | 22.4024093 | -0.014938813 | 4.60337468 | 0.9101482   | RNA15   |
| YMR237W   | 157.893532 | 165.995499 | 167.656247 | 155.153557 | 169.40727  | 161.981685 | -0.015031875 | 7.34995257 | 0.863631087 | BCH1    |
| YJL056C   | 47.7429004 | 52.3772205 | 47.2705879 | 45.6473116 | 49.2584216 | 51.0671635 | -0.015034398 | 5.61525052 | 0.881316812 | ZAP1    |
| YPL133C   | 27.8171445 | 27.9153318 | 25.2997513 | 27.4948185 | 27.496103  | 25.1785003 | -0.015035128 | 4.75449581 | 0.897024468 | RDS2    |
| YGR280C   | 59.7115063 | 53.4708108 | 59.4362578 | 60.5477294 | 56.2301823 | 53.9078148 | -0.015170371 | 5.84148828 | 0.867839403 | PXR1    |
| YKR042W   | 1804.30022 | 1502.30531 | 1927.19948 | 1669.31982 | 1727.36774 | 1781.79854 | -0.015315952 | 10.761127  | 0.886094705 | UTH1    |
| YKL008C   | 209.056034 | 154.311135 | 187.508683 | 174.311237 | 189.149732 | 181.478883 | -0.015340577 | 7.5135781  | 0.888633166 | LAC1    |
| YGR002C   | 35.248202  | 38.7361202 | 33.1075693 | 33.4668114 | 35.70584   | 36.8639069 | -0.015385502 | 5.15567876 | 0.891662168 | SWC4    |
| YNL257C   | 92.3950071 | 98.7109155 | 88.4886038 | 94.7240845 | 96.887927  | 85.0258588 | -0.015430527 | 6.53661892 | 0.864585135 | SIP3    |
| YKL155C   | 47.9401852 | 52.2045483 | 51.3258112 | 47.3029136 | 51.4085907 | 51.2608443 | -0.015439335 | 5.65437576 | 0.874107797 | RSM22   |
| YOR331C   | 176.569818 | 192.241666 | 180.245597 | 199.618295 | 170.710403 | 172.827809 | -0.015480059 | 7.50921046 | 0.87085304  | YOR331C |
| YHR175W   | 68.194749  | 56.4062374 | 69.1203731 | 55.3444089 | 58.9667612 | 77.3431882 | -0.015486296 | 6.00738051 | 0.90427444  | CTR2    |
| YDR117C   | 60.8294531 | 68.147944  | 51.5073884 | 65.573664  | 58.1197249 | 54.8116584 | -0.015700626 | 5.90624012 | 0.890736325 | TMA64   |
| YDR525W-A | 1.5782777  | 1.66916417 | 1.39209158 | 1.35995877 | 1.43344613 | 1.8076872  | -0.01573784  | 0.73345298 | 1           | SNA2    |
| YER132C   | 81.8073942 | 80.4652244 | 81.8307745 | 74.2064457 | 81.1200196 | 86.1879434 | -0.015796557 | 6.34076324 | 0.859496782 | PMD1    |
| YNR025C   | 3.55112483 | 4.6621482  | 2.78418316 | 3.07468938 | 4.03971182 | 3.80905518 | -0.01581446  | 1.91773084 | 1           | YNR025C |
| YKR064W   | 47.5456157 | 55.139975  | 51.386337  | 50.6141176 | 54.4057963 | 47.4517891 | -0.015996837 | 5.67877555 | 0.876978328 | OAF3    |
| YKR001C   | 369.64579  | 392.426252 | 347.901843 | 389.657751 | 351.389772 | 356.566301 | -0.016114231 | 8.52382565 | 0.86332336  | VPS1    |
| YBL024W   | 199.191798 | 213.192555 | 198.16121  | 219.01249  | 200.552145 | 184.125854 | -0.016203061 | 7.66186362 | 0.864813146 | NCL1    |
| YPL120W   | 22.8192651 | 21.1235603 | 17.6129848 | 21.0497966 | 20.0030892 | 19.7554387 | -0.016240267 | 4.35854791 | 0.905054473 | VPS30   |
| YPR054W   | 43.5341599 | 35.3402345 | 42.9732618 | 39.143161  | 39.5500819 | 41.7059262 | -0.016313716 | 5.3392479  | 0.879585389 | SMK1    |
| YGR102C   | 18.2817167 | 19.4543962 | 20.5787451 | 18.0933645 | 18.3090165 | 21.3048849 | -0.016389688 | 4.28255805 | 0.911383661 | GTF1    |
| YNL069C   | 2661.04197 | 2103.03174 | 2328.96921 | 2508.71002 | 2282.82812 | 2221.19565 | -0.016393539 | 11.1991045 | 0.878993077 | RPL16B  |
| YOR079W   | 37.7471417 | 35.2826771 | 40.7943358 | 35.7136998 | 35.5755267 | 41.2540044 | -0.016401135 | 5.24203251 | 0.882476732 | MRL1    |
| YJL134W   | 132.70685  | 109.704376 | 117.177795 | 126.71268  | 114.089281 | 114.529896 | -0.016406984 | 6.89808313 | 0.859833701 | LCB3    |
| YDL001W   | 22.7535035 | 25.2101347 | 22.4550424 | 24.3610005 | 22.7396681 | 22.5315298 | -0.016410446 | 4.55315382 | 0.895856782 | RMD1    |
| YPL078C   | 96.537986  | 135.432527 | 109.1884   | 113.467864 | 113.633184 | 110.33348  | -0.01646894  | 6.82338132 | 0.885556078 | ATP4    |
| YER045C   | 26.2388668 | 23.7136427 | 27.5997287 | 24.1244859 | 26.9748499 | 25.5658619 | -0.016616877 | 4.69022333 | 0.892212835 | ACA1    |
| YIL047C   | 313.945739 | 248.705461 | 304.141747 | 256.204406 | 279.326525 | 321.25184  | -0.016701806 | 8.16670522 | 0.884316183 | SYG1    |
| YJR111C   | 28.6062833 | 28.3182335 | 24.7550198 | 27.080918  | 26.1929702 | 27.4381093 | -0.016798758 | 4.76490592 | 0.885484338 | YJR111C |
| YGL206C   | 441.786233 | 426.557781 | 442.685122 | 429.451327 | 437.135913 | 429.19659  | -0.016856291 | 8.76351037 | 0.846811674 | CHC1    |
| YBR020W   | 27.0937672 | 22.2171507 | 25.4813285 | 24.4201292 | 25.2156206 | 24.2100965 | -0.016944566 | 4.63714357 | 0.88790105  | GAL1    |
| YJL073W   | 56.0946199 | 52.9527943 | 55.3810345 | 50.1410884 | 56.6211221 | 55.7800623 | -0.016964322 | 5.77102662 | 0.856636229 | JEM1    |
| YML105C   | 54.7793885 | 61.4712873 | 56.7731261 | 59.0103847 | 59.1622312 | 52.8748507 | -0.01697144  | 5.84502064 | 0.858893468 | SEC65   |
| YOR098C   | 311.183753 | 308.047125 | 310.557473 | 279.028062 | 317.834101 | 322.091123 | -0.017029809 | 8.26789558 | 0.855117007 | NUP1    |
| YOR084W   | 62.9338233 | 51.4563023 | 61.9783381 | 60.4294721 | 60.8563039 | 57.6748507 | -0.01715659  | 5.87124469 | 0.867061734 | LXP1    |
| YJL164C   | 25.7127742 | 30.5054141 | 24.8155455 | 28.73652   | 23.782744  | 27.5672299 | -0.017217466 | 4.75466981 | 0.897237723 | TPK1    |
| YNL183C   | 78.7166003 | 69.5868786 | 75.4755738 | 65.573664  | 74.9301386 | 80.6357613 | -0.017239862 | 6.21444728 | 0.861950173 | NPR1    |
| YHR132C   | 146.253734 | 138.88597  | 131.885546 | 142.677413 | 135.004563 | 134.285335 | -0.017266173 | 7.11154033 | 0.838099914 | ECM14   |
| YNL274C   | 28.1459523 | 26.3612824 | 26.9339458 | 30.8060225 | 25.9323436 | 23.6290542 | -0.017269768 | 4.76029913 | 0.888111405 | GOR1    |
| YMR075W   | 37.0237644 | 43.9738422 | 38.5548841 | 39.0840324 | 41.1789979 | 37.9614313 | -0.017332524 | 5.31341554 | 0.875104798 | RCO1    |
| YDL224C   | 162.957173 | 146.656217 | 177.945619 | 142.973056 | 160.350497 | 178.444551 | -0.017348866 | 7.33682694 | 0.870081196 | WHI4    |
| YGR140W   | 56.1603815 | 61.7590743 | 56.0468175 | 53.9253215 | 56.3728785 | 60.2992803 | -0.017768203 | 5.85245846 | 0.852334292 | CBF2    |
| YBR139W   | 169.336045 | 125.4751   | 145.443307 | 150.186751 | 137.741142 | 146.745465 | -0.017810434 | 7.18908733 | 0.865876496 | YBR139W |
| YML043C   | 42.6134979 | 47.081941  | 49.2679367 | 43.4595519 | 46.1960594 | 47.7100301 | -0.017867093 | 5.52927905 | 0.861799854 | RRN11   |
| YNL130C   | 221.353448 | 193.910831 | 219.466264 | 185.723065 | 211.107521 | 230.092757 | -0.01789312  | 7.71683823 | 0.862540454 | CPT1    |
| YBR104W   | 23.4768808 | 26.303725  | 24.7550198 | 24.2427432 | 25.867187  | 23.5644939 | -0.017973224 | 4.63412211 | 0.885230262 | YMC2    |
| YDR397C   | 7.82562693 | 8.46093562 | 6.1130978  | 8.10062396 | 6.25503766 | 7.74723087 | -0.018016567 | 2.91636256 | 0.949008789 | NCB2    |
| YMR076C   | 109.229969 | 109.531704 | 109.975235 | 110.629689 | 110.831448 | 103.167291 | -0.018055599 | 6.76846379 | 0.82538386  | PDS5    |
| YOR001W   | 105.08699  | 105.099785 | 103.317405 | 106.963713 | 105.684074 | 96.9049462 | -0.018109076 | 6.70003289 | 0.827190601 | RRP6    |
| YPR128C   | 63.5256775 | 59.5143362 | 64.823047  | 62.3215887 | 59.0319179 | 64.1083355 | -0.018127119 | 5.96214173 | 0.835007723 | ANT1    |
| YOR085W   | 205.636432 | 164.326335 | 198.221736 | 164.673268 | 189.149732 | 207.238426 | -0.018149884 | 7.55690262 | 0.872138681 | OST3    |
| YDR166C   | 80.8209706 | 85.5302743 | 79.7729    | 84.8496013 | 78.1228141 | 80.054719  | -0.018175598 | 6.35154    | 0.829390997 | SEC5    |
| YMR241W   | 161.839226 | 160.872891 | 169.048338 | 171.946091 | 156.050158 | 157.527028 | -0.018220852 | 7.34883931 | 0.833699418 | YHM2    |
| YGR091W   | 20.1230407 | 21.7566916 | 22.6971453 | 19.0985514 | 21.8274752 | 22.9188913 | -0.018394512 | 4.42793726 | 0.896303116 | PRP31   |
| YMR113W   | 31.8943619 | 37.9878742 | 34.681238  | 36.3641148 | 31.5358149 | 35.379021  | -0.01840675  | 5.12031909 | 0.872981319 | FOL3    |
| YJL125C   | 68.194749  | 77.9902569 | 67.0019729 | 68.2344529 | 70.7601135 | 71.5973253 | -0.018446271 | 6.14488092 | 0.843524913 | GCD14   |
| YLR096W   | 135.863405 | 144.18125  | 143.022278 | 130.61517  | 140.412564 | 146.745465 | -0.018559066 | 7.13198979 | 0.831373518 | KIN2    |
| YLR023C   | 103.771759 | 85.5302743 | 106.827897 | 88.5155771 | 103.403591 | 100.3912   | -0.018645979 | 6.61727526 | 0.856948481 | IZH3    |
| YNL124W   | 90.7509678 | 84.7244709 | 94.299073  | 81.6566546 | 91.610239  | 93.0313307 | -0.018937719 | 6.48312088 | 0.834091308 | NAF1    |
| YEL028W   | 3.35384011 | 3.22321357 | 4.3578519  | 3.90249037 | 3.77908525 | 3.09889235 | -0.01898502  | 1.90555218 | 0.970135144 | YEL028W |
| YPL271W   | 12.100129  | 9.26673901 | 9.38148672 | 10.8796701 | 8.79614671 | 10.5878822 | -0.01910634  | 3.36236929 | 0.918782497 | ATP15   |
| YLR265C   | 29.9215147 | 41.6715468 | 31.1102205 | 32.2842385 | 33.6208274 | 35.5727018 | -0.019126061 | 5.0947851  | 0.893277799 | NEJ1    |
| YKR017C   | 36.4319103 | 40.1750548 | 37.8285755 | 37.6058163 | 39.0939854 | 36.2828646 | -0.019231999 | 5.24921342 | 0.851280442 | HEL1    |
| YOR105W   | 1.24946985 | 2.76275449 | 3.08681176 | 2.12863111 | 2.41079576 | 2.51785003 | -0.019301906 | 1.31903974 | 1           | YOR105W |
| YKL077W   | 165.061543 | 196.903815 | 170.86411  | 177.267669 | 172.013536 | 176.507743 | -0.019453958 | 7.46414954 | 0.838075914 | YKL077W |

|           |            |            |            |            |            |            |              |            |             |           |
|-----------|------------|------------|------------|------------|------------|------------|--------------|------------|-------------|-----------|
| YER076C   | 22.0301262 | 16.3462974 | 20.6997965 | 19.985481  | 19.5469927 | 18.6579143 | -0.01948441  | 4.29676224 | 0.889923448 | YER076C   |
| YOR300W   | 0.65761571 | 0.57557385 | 0.36315432 | 0.65041506 | 0.4560965  | 0.4519218  | -0.01954519  | -0.6205739 | 1           | YOR300W   |
| YER056C   | 863.975518 | 744.159432 | 906.372669 | 698.545777 | 850.685121 | 931.410832 | -0.01958358  | 9.70151615 | 0.869682864 | FCY2      |
| YLR009W   | 69.6415035 | 74.9972728 | 66.0335614 | 78.4637079 | 67.8280646 | 61.4613649 | -0.019670505 | 6.1268216  | 0.84820957  | RLP24     |
| YKL105C   | 101.73315  | 83.2279789 | 94.5411759 | 91.9450383 | 95.0635411 | 88.576673  | -0.01970089  | 6.53330178 | 0.830966049 | SEG2      |
| YFR052W   | 115.016987 | 146.886447 | 120.143556 | 127.12658  | 126.208416 | 123.632893 | -0.019791264 | 6.98467474 | 0.845010463 | RPN12     |
| YDR119W   | 365.108241 | 320.421963 | 354.862301 | 333.95857  | 348.848663 | 343.202328 | -0.020000479 | 8.42840863 | 0.827534177 | VBA4      |
| YOR174W   | 19.3339018 | 20.4328717 | 20.5787451 | 21.1680538 | 19.2863661 | 19.0452759 | -0.020035837 | 4.32970872 | 0.876227171 | MED4      |
| YDL108W   | 25.5154895 | 26.1886102 | 26.5102657 | 26.7261462 | 24.954994  | 25.4367414 | -0.020108691 | 4.70148988 | 0.858037139 | KIN28     |
| YCR092C   | 58.7250828 | 60.4352544 | 59.617835  | 58.4782269 | 58.9667612 | 58.8789546 | -0.020182192 | 5.89020089 | 0.813077116 | MSH3      |
| YDR460W   | 20.5176101 | 19.9148553 | 21.0024251 | 21.1680538 | 20.2637157 | 19.1098361 | -0.020259471 | 4.35448121 | 0.869391353 | TFB3      |
| YOR296W   | 72.1404432 | 72.9827644 | 79.4097457 | 73.496902  | 72.4541862 | 75.4709407 | -0.020285918 | 6.21824533 | 0.812844479 | YOR296W   |
| YOR179C   | 7.95715007 | 8.9213947  | 7.32361222 | 9.69709729 | 6.25503766 | 7.87635139 | -0.020299502 | 3.02636953 | 0.938299319 | SYC1      |
| YHR180W   | 3.94569425 | 3.97145957 | 3.08681176 | 2.83871482 | 4.03971182 | 4.00273595 | -0.02029979  | 1.9116724  | 0.971027866 | YHR180W   |
| YLR153C   | 656.760808 | 517.786237 | 620.812318 | 579.51982  | 597.812193 | 592.792282 | -0.020337667 | 9.21517013 | 0.844033866 | ACS2      |
| YNL245C   | 28.2117139 | 27.6851023 | 28.2655116 | 27.0217894 | 27.691573  | 28.2773927 | -0.020353415 | 4.80632984 | 0.851494313 | CWC25     |
| YBR173C   | 53.4641571 | 61.4137299 | 56.7126004 | 50.2593457 | 61.3124004 | 57.7814303 | -0.020367238 | 5.83154812 | 0.847633358 | UMP1      |
| YPR040W   | 36.8922413 | 38.4483333 | 41.9443245 | 34.2946124 | 39.4197686 | 42.0287275 | -0.020385378 | 5.28377476 | 0.859255524 | TIP41     |
| YOL004W   | 363.398441 | 312.939503 | 358.735947 | 321.068526 | 361.293581 | 338.102067 | -0.020464782 | 8.4207842  | 0.83252518  | SIN3      |
| YGL232W   | 33.7356859 | 34.8797754 | 34.681238  | 33.7624546 | 34.4027071 | 33.7004543 | -0.020509523 | 5.10097969 | 0.839253803 | TAN1      |
| YGL065C   | 63.0653465 | 65.0398452 | 62.8256982 | 67.229266  | 58.1848815 | 62.7525701 | -0.020593824 | 5.98453716 | 0.817066703 | ALG2      |
| YGL205W   | 10.7191361 | 9.6696407  | 11.499887  | 10.4657696 | 10.8811593 | 10.0714001 | -0.020612685 | 3.41566342 | 0.895715592 | POX1      |
| YLR206W   | 171.506177 | 146.541103 | 163.237869 | 145.811231 | 168.560234 | 160.044878 | -0.020667812 | 7.31638458 | 0.828523275 | ENT2      |
| YLR026C   | 28.9350912 | 35.8006936 | 33.7128265 | 29.0321632 | 33.6208274 | 34.5397376 | -0.020730728 | 5.03283406 | 0.827278758 | SED5      |
| YOR316C   | 75.2969986 | 66.0758781 | 79.0465914 | 66.5788509 | 70.6298002 | 80.054719  | -0.020803544 | 6.19091958 | 0.837167823 | COT1      |
| YDR289C   | 15.4539692 | 16.6916417 | 17.1893047 | 20.2219956 | 15.6375941 | 12.7183707 | -0.020810239 | 4.04156698 | 0.913478263 | RTT103    |
| YOR317W   | 399.041212 | 405.319106 | 408.124935 | 420.049873 | 393.741589 | 381.163759 | -0.020961615 | 8.64879771 | 0.81414517  | FAA1      |
| YGR039W   | 1.31523142 | 1.20870509 | 1.51314302 | 0.82780099 | 1.49860277 | 1.67856669 | -0.021041823 | 0.54316885 | 1           | YGR039W   |
| YDL061C   | 26.4361515 | 21.3537899 | 21.9708366 | 20.1628669 | 22.4790416 | 26.0823439 | -0.021109201 | 4.53481867 | 0.882420456 | RPS29B    |
| YGL030W   | 846.48294  | 725.223053 | 919.08307  | 839.331073 | 799.211374 | 815.847971 | -0.021190329 | 9.6870505  | 0.838044842 | RPL30     |
| YDR028C   | 161.707703 | 158.340367 | 154.037959 | 159.292562 | 151.489193 | 156.300383 | -0.021310956 | 7.29449625 | 0.797445568 | CDC14     |
| YBL030C   | 851.415058 | 677.96844  | 801.54212  | 770.68272  | 779.143128 | 746.703936 | -0.021373411 | 9.59124006 | 0.835173242 | PET9      |
| YDL175C   | 21.5040337 | 22.6200524 | 19.0656021 | 22.5280126 | 20.2637157 | 19.4326374 | -0.021440824 | 4.39478436 | 0.870142829 | AIR2      |
| YHR056C   | 130.273672 | 142.396971 | 142.538072 | 118.612056 | 141.84601  | 148.746833 | -0.021582885 | 7.10350032 | 0.829724626 | RSC30     |
| YDR034C-A | 1.77556241 | 0.97847555 | 0.96841153 | 1.53734469 | 1.10766292 | 0.96840386 | -0.021614345 | 0.42532674 | 0.942409382 | YDR034C-A |
| YLR450W   | 181.304651 | 141.476053 | 168.74571  | 155.330943 | 162.826449 | 165.855301 | -0.021918381 | 7.34598863 | 0.827413629 | HMG2      |
| YPR029C   | 153.684791 | 163.635646 | 142.71965  | 159.942977 | 151.16341  | 141.968006 | -0.021936787 | 7.25096696 | 0.808297679 | APL4      |
| YGL061C   | 10.1272819 | 10.0725424 | 12.0446184 | 11.884857  | 9.12192992 | 10.7170027 | -0.021967156 | 3.43243238 | 0.905656928 | DUO1      |
| YDL147W   | 140.335192 | 167.089089 | 157.4274   | 152.137996 | 153.378736 | 152.426767 | -0.022003423 | 7.26620647 | 0.808848961 | RPN5      |
| YLR197W   | 644.594918 | 709.509887 | 635.338491 | 684.532289 | 656.583484 | 618.035343 | -0.022146203 | 9.36246202 | 0.814699323 | NOP56     |
| YDL238C   | 18.8735708 | 16.4038548 | 17.0682533 | 15.6690901 | 18.765113  | 17.1084682 | -0.022156241 | 4.12289703 | 0.886854368 | GUD1      |
| YJR138W   | 94.6309005 | 102.221916 | 98.5963992 | 94.3693126 | 99.0380962 | 97.615109  | -0.022267188 | 6.61283978 | 0.790039842 | IML1      |
| YOR267C   | 118.668112 | 110.740409 | 125.400293 | 116.010396 | 118.063836 | 115.175499 | -0.022268953 | 6.8758779  | 0.791984681 | HRK1      |
| YPL244C   | 96.537986  | 92.0918162 | 100.230594 | 99.6908904 | 91.0238292 | 93.612373  | -0.022369514 | 6.57982842 | 0.790191953 | HUT1      |
| YGL067W   | 102.325004 | 87.8901271 | 99.0806049 | 94.5466986 | 91.5450824 | 98.6480731 | -0.022377002 | 6.58173953 | 0.799863258 | NPY1      |
| YER023W   | 277.645352 | 250.604855 | 250.939638 | 278.259389 | 245.184445 | 243.585851 | -0.02241666  | 8.01026815 | 0.814385561 | PRO3      |
| YGR157W   | 629.995849 | 523.139074 | 602.473025 | 573.252184 | 563.474642 | 591.242836 | -0.022808233 | 9.18166302 | 0.815182167 | CH02      |
| YKL096W-A | 2002.24255 | 1838.21021 | 1855.35545 | 1539.35507 | 2021.48483 | 2044.68791 | -0.023067018 | 10.8793162 | 0.842583583 | CWP2      |
| YOR275C   | 66.8795176 | 79.0838472 | 68.6361674 | 69.7717976 | 70.1737037 | 71.3390843 | -0.023266912 | 6.15212142 | 0.803332568 | RIM20     |
| YKL089W   | 20.7806564 | 22.6200524 | 22.2734653 | 24.3018719 | 21.8926318 | 18.3996733 | -0.023301837 | 4.44970499 | 0.863951454 | MIF2      |
| YAL031C   | 61.1582609 | 61.0108283 | 55.3205088 | 57.2365255 | 60.4002074 | 57.0067072 | -0.02336983  | 5.8779859  | 0.794002361 | GIP4      |
| YER123W   | 71.2855428 | 82.191946  | 71.4808763 | 77.3993924 | 71.6071498 | 72.3720484 | -0.023424613 | 6.21974905 | 0.798757953 | YCK3      |
| YKR070W   | 80.0975933 | 88.3505862 | 81.4070945 | 78.0498075 | 79.3607903 | 88.5121127 | -0.023539783 | 6.37081141 | 0.79438111  | YKR070W   |
| YDR094W   | 12.2316522 | 9.49696855 | 10.1683211 | 8.81016766 | 9.96896627 | 12.5892602 | -0.023590829 | 3.4121432  | 0.900500129 | YDR094W   |
| YOR361C   | 671.820208 | 708.761641 | 673.469695 | 716.402627 | 659.711003 | 644.569609 | -0.023610376 | 9.40781739 | 0.797610583 | PRT1      |
| YLR002C   | 94.8281852 | 115.172328 | 106.162114 | 108.501058 | 102.165615 | 100.3912   | -0.023888191 | 6.70987433 | 0.797756247 | NOC3      |
| YPR053C   | 44.7178682 | 37.5849725 | 46.181125  | 33.6441973 | 40.8532147 | 51.9064468 | -0.02393787  | 5.41197421 | 0.86980571  | YPR053C   |
| YJL109C   | 464.079406 | 420.399141 | 496.068808 | 388.711693 | 480.921177 | 488.140105 | -0.024059825 | 8.83443475 | 0.827260903 | UTP10     |
| YDR177W   | 34.4590631 | 43.2255962 | 33.7733522 | 40.2074766 | 37.9863224 | 31.4408453 | -0.024175249 | 5.20935989 | 0.853733784 | UBC1      |
| YGR246C   | 50.8336943 | 53.5283682 | 49.3889882 | 54.1027074 | 49.2584216 | 47.7745904 | -0.024368801 | 5.67100701 | 0.794236708 | BRF1      |
| YML112W   | 19.3996634 | 19.6846257 | 20.0340136 | 18.2707504 | 20.5243423 | 19.3680772 | -0.024500944 | 4.29773603 | 0.851739789 | CTK3      |
| YLR343W   | 47.0852847 | 42.2471207 | 51.6889656 | 45.1151539 | 44.3065167 | 49.194916  | -0.024520984 | 5.54607433 | 0.812289562 | GAS2      |
| YNR043W   | 269.622441 | 244.676444 | 250.092278 | 254.075775 | 249.159    | 248.169629 | -0.024552309 | 7.98156863 | 0.782127611 | MVD1      |
| YGR042W   | 15.1251613 | 14.3317889 | 16.5235218 | 12.890044  | 15.4421242 | 16.9147874 | -0.024562811 | 3.9369803  | 0.884002845 | YGR042W   |
| YJR143C   | 751.45747  | 561.414735 | 706.093059 | 609.55717  | 668.572306 | 706.676576 | -0.024568893 | 9.38238119 | 0.832291118 | PMT4      |
| YPL146C   | 54.6478654 | 66.2485503 | 63.2493782 | 65.8101786 | 59.1622312 | 56.1028636 | -0.024577921 | 5.93119618 | 0.811306437 | NOP53     |
| YOR080W   | 37.1552875 | 37.2971856 | 35.2864952 | 37.7240736 | 35.800567  | 34.7334184 | -0.02460585  | 5.18554092 | 0.801843024 | DIA2      |
| YKL011C   | 15.322446  | 20.6631013 | 17.6735105 | 18.5663936 | 17.1361969 | 17.1084682 | -0.024638275 | 4.1612332  | 0.877316464 | CCE1      |
| YOL068C   | 107.980499 | 112.524688 | 109.006823 | 109.26973  | 106.205327 | 108.461232 | -0.024701231 | 6.76867961 | 0.759311564 | HST1      |
| YGR090W   | 349.785795 | 353.920361 | 364.970096 | 320.595497 | 369.568475 | 360.439916 | -0.02473173  | 8.46487057 | 0.790378403 | UTP22     |
| YIL016W   | 25.4497279 | 29.0089221 | 26.44974   | 30.3329934 | 25.8020303 | 23.3708131 | -0.024745407 | 4.74855769 | 0.847102655 | SNL1      |
| YGL091C   | 28.8693296 | 29.4118238 | 29.7181289 | 30.6877652 | 27.8218862 | 27.9545914 | -0.024768443 | 4.86836625 | 0.816516911 | NBP35     |
| YDR458C   | 74.4420982 | 69.5293213 | 75.1729452 | 80.4740818 | 70.6949569 | 64.1083355 | -0.024775536 | 6.18063094 | 0.797181452 | HEH2      |



|           |            |            |            |            |            |            |              |            |             |           |
|-----------|------------|------------|------------|------------|------------|------------|--------------|------------|-------------|-----------|
| YPL126W   | 279.026345 | 288.765401 | 288.526111 | 248.340296 | 288.578769 | 304.918095 | -0.024801591 | 8.14537497 | 0.801353484 | NAN1      |
| YGL050W   | 22.4904572 | 24.3467739 | 23.5445054 | 23.296685  | 22.1532584 | 23.7581747 | -0.02482105  | 4.54818748 | 0.835470228 | TYW3      |
| YPL249C-A | 398.449358 | 450.78944  | 346.570277 | 488.284326 | 379.081345 | 307.694186 | -0.025174699 | 8.62682454 | 0.863604827 | RPL36B    |
| YPR021C   | 72.1404432 | 79.5443063 | 74.567688  | 75.2116326 | 75.9726449 | 71.2099638 | -0.025219476 | 6.22704582 | 0.769310517 | AGC1      |
| YOL099C   | 4.86635624 | 4.94993512 | 2.78418316 | 4.13900494 | 3.90939854 | 4.32553724 | -0.025221489 | 2.09935552 | 0.927753469 | YOL099C   |
| YGR241C   | 79.9003086 | 80.695454  | 78.5018599 | 73.6151593 | 78.3834406 | 83.0244908 | -0.025224752 | 6.30631793 | 0.768360775 | YAP1802   |
| YNL041C   | 64.4463394 | 73.673453  | 68.2730131 | 66.3423363 | 68.4144744 | 68.1756317 | -0.025235176 | 6.09494999 | 0.77876951  | COG6      |
| YKL068W   | 152.172275 | 157.131661 | 168.443081 | 136.882806 | 162.761292 | 169.922597 | -0.025312759 | 7.30378254 | 0.799336002 | NUP100    |
| YLR286C   | 1860.39484 | 1510.4209  | 1778.36673 | 1600.43495 | 1723.78413 | 1735.31515 | -0.025320411 | 10.7326374 | 0.806128747 | CTS1      |
| YNR018W   | 95.0912315 | 105.44513  | 100.291119 | 93.8371549 | 99.7548193 | 102.134327 | -0.025322186 | 6.63740024 | 0.770039849 | RCF2      |
| YJL130C   | 851.809627 | 711.869739 | 848.631131 | 726.336238 | 833.679238 | 810.295789 | -0.025325697 | 9.63880648 | 0.808079379 | URA2      |
| YOR311C   | 127.906255 | 110.797966 | 117.480424 | 119.439857 | 111.743641 | 118.661753 | -0.025335552 | 6.88004185 | 0.769736848 | DGK1      |
| YDL090C   | 33.5384011 | 38.1605463 | 34.1970322 | 35.3589279 | 33.685984  | 35.0562197 | -0.025380873 | 5.13483493 | 0.82070123  | RAM1      |
| YNL252C   | 43.4683983 | 45.1825473 | 46.1205992 | 51.5010472 | 42.2866608 | 38.5424736 | -0.02545525  | 5.48096374 | 0.821090684 | MRPL17    |
| YBR046C   | 37.6156185 | 45.4127769 | 40.3706558 | 44.5238674 | 39.4849252 | 37.2512684 | -0.025473694 | 5.35489647 | 0.820228003 | ZTA1      |
| YOR189W   | 6.24734923 | 6.90688622 | 5.62889203 | 8.04149531 | 4.43065167 | 5.93954367 | -0.025489525 | 2.66527877 | 0.914762785 | IES4      |
| YHR133C   | 166.968628 | 137.677265 | 162.995766 | 146.28426  | 146.146349 | 166.888265 | -0.025685395 | 7.2723901  | 0.795173172 | NSG1      |
| YEL025C   | 125.933408 | 116.035688 | 123.169842 | 119.676371 | 120.474632 | 118.468072 | -0.025725237 | 6.91581637 | 0.75324653  | YEL025C   |
| YDR323C   | 15.2566844 | 20.02997   | 16.4024703 | 18.6846509 | 17.85292   | 14.2678169 | -0.025749769 | 4.1068783  | 0.874531523 | PEP7      |
| YNL331C   | 21.2409874 | 20.778216  | 22.2129395 | 20.9906679 | 21.2410654 | 20.8529631 | -0.025914701 | 4.415696   | 0.828423154 | AAD14     |
| YHR182W   | 40.5091277 | 42.1320059 | 43.0337875 | 40.2074766 | 41.3744678 | 41.899607  | -0.026008861 | 5.38030935 | 0.784251955 | YHR182W   |
| YGR204W   | 1301.55301 | 1128.12475 | 1230.91158 | 1200.2523  | 1221.68704 | 1173.12443 | -0.026023552 | 10.2400613 | 0.783325015 | ADE3      |
| YDR081C   | 77.6644152 | 93.1854065 | 85.2807406 | 78.9958657 | 86.2022377 | 86.5107447 | -0.026136301 | 6.40552856 | 0.782172651 | PDC2      |
| YHR048W   | 34.1302553 | 29.2391517 | 35.1654438 | 33.9398405 | 31.144875  | 31.5699658 | -0.026332063 | 5.0291146  | 0.810586997 | YHK8      |
| YOR18C    | 34.5248247 | 36.6640543 | 32.0181063 | 32.6390104 | 33.8162973 | 34.9270992 | -0.026421836 | 5.0968878  | 0.804536895 | KIN3      |
| YAL044W-A | 16.8349621 | 17.036986  | 18.0366648 | 17.679464  | 16.5498781 | 16.7211066 | -0.026496505 | 4.11040382 | 0.844856853 | YAL044W-A |
| YPL212C   | 125.210031 | 121.848984 | 126.740859 | 123.519733 | 125.817476 | 117.628789 | -0.026513212 | 6.94935572 | 0.745580106 | PUS1      |
| YDR195W   | 37.7471417 | 43.2831536 | 39.5838214 | 40.3848625 | 39.6152385 | 38.4779133 | -0.026529249 | 5.32139519 | 0.792819542 | REF2      |
| YDR499W   | 37.6156185 | 38.6210054 | 35.8917524 | 36.4823721 | 37.3999127 | 36.2183043 | -0.026549927 | 5.21580597 | 0.785506927 | LCD1      |
| YOR156C   | 38.3389958 | 39.1390219 | 35.5285981 | 32.875525  | 39.0288287 | 39.1235159 | -0.026564318 | 5.22701548 | 0.810696836 | NFI1      |
| YGL151W   | 122.448045 | 134.338937 | 121.656699 | 123.105833 | 120.995885 | 127.506508 | -0.026571218 | 6.96739912 | 0.754715306 | NU11      |
| YLL018C   | 798.016662 | 746.346613 | 787.268173 | 830.875678 | 783.275941 | 704.804329 | -0.026835852 | 9.58926957 | 0.781103106 | DPS1      |
| YNL204C   | 12.6919832 | 12.7201821 | 14.3445958 | 11.0570561 | 14.3996179 | 13.6222143 | -0.026956927 | 3.72829975 | 0.881706064 | SPS18     |
| YEL050W-A | 3.48536326 | 3.97145957 | 3.26838892 | 3.90249037 | 3.58361532 | 3.03433209 | -0.027180582 | 1.87663736 | 0.937466366 | YEL050W-A |
| YGR187C   | 44.5205835 | 55.7731062 | 47.6337423 | 51.3827899 | 46.7824691 | 47.0644275 | -0.02723321  | 5.61491881 | 0.799052909 | HGH1      |
| YML005W   | 29.263899  | 35.570464  | 29.4155003 | 29.6234496 | 29.4508023 | 33.5067735 | -0.027274571 | 4.96683526 | 0.825119244 | TRM12     |
| YFR051C   | 423.109947 | 344.653622 | 427.251063 | 359.561272 | 382.86043  | 430.164994 | -0.027291708 | 8.62461694 | 0.803157232 | RET2      |
| YOR064W   | 53.4641571 | 56.0608931 | 56.1678689 | 53.2157778 | 55.9695557 | 53.455893  | -0.027364215 | 5.77739004 | 0.75652832  | AEP1      |
| YBR015C   | 309.079383 | 261.080299 | 304.565427 | 283.226195 | 284.995153 | 289.940115 | -0.027434261 | 8.17455232 | 0.772823546 | MNN2      |
| YBR034C   | 150.857044 | 180.557517 | 163.964178 | 154.207498 | 164.846305 | 167.081946 | -0.027639414 | 7.35508638 | 0.77054825  | HMT1      |
| YJR126C   | 140.072146 | 126.108231 | 137.151283 | 128.841311 | 128.684368 | 138.09439  | -0.027650131 | 7.05824231 | 0.746619118 | VPS70     |
| YNR066C   | 19.8599944 | 17.4974451 | 16.2208932 | 16.851663  | 17.7226067 | 17.9477515 | -0.027782733 | 4.15344364 | 0.846650721 | YOR066C   |
| YDR304C   | 275.804028 | 256.533266 | 279.084099 | 263.832001 | 260.105316 | 271.927804 | -0.027851936 | 8.06609044 | 0.754209225 | CPR5      |
| YKR100C   | 68.9181263 | 64.6369435 | 65.4888299 | 68.6815474 | 64.7657024 | 66.755306  | -0.027873118 | 6.04056648 | 0.740673288 | SKG1      |
| YEL002C   | 429.09425  | 356.510444 | 419.866925 | 384.099659 | 401.560386 | 396.658221 | -0.027884385 | 8.63688665 | 0.774872412 | WBP1      |
| YMR287C   | 51.8858794 | 59.2841067 | 54.1099944 | 51.1462753 | 54.9922061 | 56.1028636 | -0.027975282 | 5.77388987 | 0.770447811 | DSS1      |
| YDL226C   | 143.754794 | 150.224775 | 146.351193 | 142.973056 | 144.647746 | 144.292175 | -0.027998223 | 7.184891   | 0.731423646 | GCS1      |
| YLR457C   | 9.33814306 | 10.6481163 | 8.65517807 | 8.98755359 | 10.2295928 | 8.9093155  | -0.028176354 | 3.2612346  | 0.8754747   | NBP1      |
| YDR412W   | 36.8922413 | 39.3116941 | 36.6180611 | 40.798763  | 35.4452134 | 34.3460569 | -0.028187608 | 5.22398726 | 0.788143929 | RRP17     |
| YKL004W   | 252.590194 | 210.142013 | 248.51861  | 216.469958 | 225.963235 | 255.013016 | -0.028192239 | 7.87581946 | 0.785660439 | AUR1      |
| YDL215C   | 158.025055 | 150.742792 | 158.940543 | 154.384884 | 150.251217 | 153.847093 | -0.02858677  | 7.27135081 | 0.72718687  | GDH2      |
| YDL046W   | 119.028443 | 88.0627993 | 103.438457 | 102.351679 | 95.4544809 | 106.459864 | -0.028641905 | 6.68043885 | 0.786628689 | NPC2      |
| YHL026C   | 29.1323759 | 26.4188398 | 29.7181289 | 25.6618306 | 32.1873813 | 25.7595426 | -0.028666644 | 4.82052877 | 0.821305938 | YHL026C   |
| YDL189W   | 69.575742  | 62.5073203 | 68.3335388 | 60.4294721 | 65.2217989 | 70.8226022 | -0.028681074 | 6.05001513 | 0.759462893 | RBS1      |
| YLR352W   | 42.7450211 | 40.9808582 | 43.5179933 | 39.7935761 | 42.2215042 | 42.7388903 | -0.028699038 | 5.39635083 | 0.763062204 | YLR352W   |
| YDR148C   | 152.238037 | 154.311135 | 149.07485  | 160.534263 | 143.996179 | 142.032566 | -0.02873039  | 7.23360989 | 0.739140932 | KGD2      |
| YGR004W   | 47.5456157 | 39.2541367 | 43.2758904 | 42.5726222 | 40.9183713 | 43.9009749 | -0.028789151 | 5.42702046 | 0.772878346 | PEX31     |
| YBR211C   | 22.1616494 | 24.2316591 | 25.2997513 | 22.291498  | 23.7170178 | 24.339217  | -0.028802573 | 4.57291987 | 0.815479365 | AME1      |
| YBR256C   | 49.5184629 | 60.8957135 | 49.7521425 | 57.650426  | 51.0828075 | 48.2910724 | -0.028816059 | 5.72832885 | 0.795044535 | RIB5      |
| YPL144W   | 20.0572791 | 24.7496756 | 23.7866083 | 22.0549835 | 21.4365353 | 23.8227349 | -0.028982602 | 4.51025931 | 0.828286927 | POC4      |
| YDR230W   | 602.639035 | 548.291651 | 613.609757 | 598.086214 | 571.945006 | 559.285509 | -0.029017524 | 9.18594504 | 0.753205148 | WTM1      |
| YNL287W   | 593.6297   | 545.874241 | 596.420453 | 568.231077 | 568.646746 |            | -0.029059829 | 9.16234611 | 0.746138208 | SEC21     |
| YER151C   | 182.94869  | 191.781207 | 187.811312 | 178.50937  | 192.993974 | 179.864877 | -0.029122239 | 7.53742583 | 0.740130389 | UBP3      |
| YJL009W   | 15.9800617 | 21.814249  | 17.3103561 | 15.0778037 | 19.5469927 | 19.4971977 | -0.029137873 | 4.19643158 | 0.868544893 | YJL009W   |
| YPL218W   | 404.565184 | 307.759338 | 371.930554 | 351.165005 | 355.429484 | 355.856138 | -0.029140032 | 8.48335595 | 0.783110633 | SAR1      |
| YMR070W   | 59.3826985 | 64.406714  | 64.5204184 | 46.7116272 | 62.8110031 | 75.1481395 | -0.029149814 | 5.96047717 | 0.834577701 | MOT3      |
| YBR183W   | 322.100174 | 242.834608 | 286.226134 | 267.557105 | 281.541851 | 284.904415 | -0.029188975 | 8.13420918 | 0.785292488 | DPM1      |
| YKL031W   | 1.5782777  | 1.09359032 | 1.39209158 | 1.24170148 | 1.49860277 | 1.22664489 | -0.029198336 | 0.54287301 |             | 1 YKL031W |
| YDR444W   | 59.7772679 | 57.6149425 | 59.0731035 | 54.339222  | 59.2925445 | 59.3308764 | -0.029211882 | 5.86675996 | 0.739897983 | YDR444W   |
| YOR291W   | 201.36193  | 166.916417 | 193.561255 | 180.638001 | 180.744526 | 189.096994 | -0.029217217 | 7.53523823 | 0.75960094  | YPK9      |
| YCR034W   | 326.177391 | 278.577744 | 329.683601 | 220.608963 | 309.754677 | 385.360176 | -0.029274086 | 8.26885888 | 0.851506763 | ELO2      |
| YBR260C   | 53.9244881 | 58.8236476 | 58.2257434 | 54.5166079 | 56.4908088 | 56.6193456 | -0.029335443 | 5.8217804  | 0.74197408  | RGD1      |
| YHR028C   | 260.350059 | 240.532313 | 249.729124 | 244.142163 | 243.425215 | 247.846828 | -0.029400191 | 7.95296665 | 0.736788011 | DAP2      |

|           |            |            |            |            |            |            |              |            |             |           |
|-----------|------------|------------|------------|------------|------------|------------|--------------|------------|-------------|-----------|
| YLR266C   | 55.5685274 | 63.0828941 | 64.9440984 | 57.8278119 | 60.3350507 | 61.8487265 | -0.029456944 | 5.92441049 | 0.754777499 | PDR8      |
| YGR113W   | 27.2910519 | 27.7426596 | 31.8970549 | 26.6670175 | 27.6264163 | 30.9243632 | -0.029583129 | 4.84869084 | 0.805432485 | DAM1      |
| YMR288W   | 53.332634  | 59.2841067 | 55.5626117 | 55.994824  | 53.4936033 | 55.3281405 | -0.029608261 | 5.79790242 | 0.74166937  | HSH155    |
| YER088C   | 367.870227 | 303.615207 | 397.16978  | 300.846531 | 358.491846 | 387.619785 | -0.029614293 | 8.46229251 | 0.805841277 | DOT6      |
| YJL118W   | 25.3839664 | 23.4834131 | 27.9023573 | 20.2219956 | 25.7368737 | 29.3103568 | -0.029628453 | 4.66925966 | 0.843711613 | YJL118W   |
| YER107C   | 54.1875344 | 74.0187973 | 56.7126004 | 59.3651566 | 61.1820871 | 60.7512021 | -0.02966698  | 5.9350445  | 0.799192445 | GLE2      |
| YAL016W   | 212.146828 | 224.991819 | 216.924183 | 216.174315 | 215.407859 | 209.175234 | -0.029721621 | 7.75444896 | 0.731811548 | TPD3      |
| YDL063C   | 74.5078598 | 86.9692089 | 81.1649916 | 69.0031252 | 82.3579958 | 86.5107447 | -0.029759845 | 6.32569217 | 0.775224558 | SYO1      |
| YDR006C   | 174.531209 | 195.752667 | 206.695337 | 159.115176 | 198.727759 | 207.496667 | -0.029798608 | 7.57368303 | 0.792273629 | SOK1      |
| YHL034W-A | 46.2961459 | 50.7080563 | 45.3942906 | 55.2852803 | 41.5699378 | 42.5452095 | -0.02987227  | 5.55817456 | 0.797853233 | YHL034W-A |
| YIL038C   | 139.019961 | 131.691297 | 134.548677 | 125.41185  | 133.440803 | 138.09439  | -0.029947154 | 7.06410465 | 0.72218311  | NOT3      |
| YDR073W   | 13.020791  | 15.4253792 | 12.7709271 | 10.8205415 | 12.8358585 | 16.7856669 | -0.030021527 | 3.77918604 | 0.881950089 | SNF11     |
| YMR032W   | 58.1989902 | 52.3196631 | 50.720554  | 55.0487657 | 51.7995306 | 50.938043  | -0.030086197 | 5.73582223 | 0.744113718 | HOF1      |
| YPL243W   | 145.924926 | 162.714728 | 152.040611 | 157.873474 | 150.18606  | 143.13009  | -0.030123672 | 7.24904212 | 0.730056152 | SRP68     |
| YLR427W   | 72.5350127 | 78.1053716 | 76.8676654 | 72.846487  | 78.4485973 | 71.5973253 | -0.030135729 | 6.2325665  | 0.726634775 | MAG2      |
| YMR285C   | 59.2511754 | 64.0038123 | 60.5257208 | 66.8744941 | 55.8392424 | 57.2003879 | -0.030219429 | 5.92502026 | 0.752295705 | NGL2      |
| YMR265C   | 42.1531669 | 43.6860553 | 38.6154099 | 43.2230373 | 39.4849252 | 39.1235159 | -0.030228391 | 5.36388196 | 0.761126761 | YMR265C   |
| YDL137W   | 171.571938 | 204.443832 | 189.566558 | 181.111103 | 186.28284  | 186.579143 | -0.030260803 | 7.54481021 | 0.747771402 | ARF2      |
| YJL061W   | 112.18924  | 103.718408 | 107.191052 | 105.722012 | 104.771881 | 105.814262 | -0.030311132 | 6.73723478 | 0.708138365 | NUP82     |
| YOR133W   | 4626.78684 | 3413.55584 | 4225.42162 | 4062.90638 | 3955.85522 | 3991.05054 | -0.030407336 | 11.9822913 | 0.78838967  | EFT1      |
| YFR005C   | 63.8544853 | 77.0693387 | 62.644121  | 69.6535403 | 63.9838227 | 65.7223419 | -0.03056773  | 6.07250055 | 0.760367909 | SAD1      |
| YLL027W   | 32.0916466 | 35.1100049 | 30.3839118 | 31.9885953 | 33.8162973 | 29.7622786 | -0.03072628  | 5.01444376 | 0.782575372 | ISA1      |
| YOR026W   | 43.0080673 | 52.1469909 | 43.2153646 | 46.5933699 | 43.6549503 | 45.2567403 | -0.030956236 | 5.51688757 | 0.768021339 | BUB3      |
| YNL249C   | 21.76708   | 24.9799052 | 24.5734426 | 22.6462699 | 24.7595241 | 22.4669695 | -0.031187411 | 4.56458682 | 0.803079039 | MPA43     |
| YNL176C   | 107.454407 | 95.6028167 | 111.367326 | 82.7209702 | 103.990001 | 121.050482 | -0.031199989 | 6.69758198 | 0.799116409 | TDA7      |
| YPL195W   | 199.652129 | 199.896799 | 187.811312 | 215.819543 | 188.367853 | 170.503639 | -0.031204813 | 7.59852406 | 0.757090469 | ADL5      |
| YAR008W   | 15.1251613 | 19.5695109 | 17.552459  | 18.0933645 | 17.3968235 | 15.6881425 | -0.031228217 | 4.11954002 | 0.833993683 | SEN34     |
| YER153C   | 26.2388668 | 21.2962325 | 24.8155455 | 23.8879714 | 23.3912346 | 23.4353734 | -0.031240398 | 4.58238858 | 0.795238683 | PET122    |
| YMR167W   | 36.0373408 | 36.5489396 | 37.3443697 | 37.1919158 | 33.7511407 | 36.6056659 | -0.031270711 | 5.18494878 | 0.750095444 | MLH1      |
| YJL110C   | 48.8608472 | 51.859204  | 48.8442567 | 46.2385981 | 50.626711  | 49.5822776 | -0.031279234 | 5.6281536  | 0.73589429  | GZF3      |
| YNR072W   | 7.10224965 | 5.8132959  | 7.50518938 | 6.03112149 | 6.97176072 | 6.97250778 | -0.031401402 | 2.77511793 | 0.881572284 | HXT17     |
| YOR033W   | 53.0695877 | 59.1689919 | 53.6257886 | 57.1773968 | 52.0601572 | 53.0685315 | -0.031402308 | 5.77699434 | 0.734571496 | RSC58     |
| YMR099C   | 179.068757 | 227.294114 | 174.132499 | 209.01975  | 186.08737  | 172.892369 | -0.031477025 | 7.58173504 | 0.786456984 | YMR099C   |
| YFR045W   | 22.9507882 | 22.274708  | 19.3682307 | 21.5819543 | 21.5668486 | 20.0136798 | -0.031548098 | 4.42059327 | 0.800749092 | YFR045W   |
| YIL049W   | 33.867209  | 28.8938073 | 36.5575354 | 25.9574738 | 32.9041043 | 38.3487928 | -0.031561974 | 5.03793684 | 0.830496612 | DFG10     |
| YGR100W   | 88.7123591 | 91.2860128 | 89.5780668 | 96.4388151 | 84.5733217 | 82.6371293 | -0.031634684 | 6.47587465 | 0.718445455 | MDR1      |
| YER166W   | 345.577055 | 295.729845 | 322.965246 | 302.443004 | 323.567885 | 317.184544 | -0.031787392 | 8.31296696 | 0.734346304 | DNF1      |
| YER087W   | 24.2660196 | 25.6705938 | 25.7234313 | 24.3018719 | 24.8898373 | 24.855699  | -0.031852432 | 4.6483881  | 0.778501472 | AIM10     |
| YHR045W   | 81.0182553 | 90.5377668 | 84.0702262 | 84.9087299 | 83.7262853 | 81.4750447 | -0.031859321 | 6.39959569 | 0.706674756 | YHR045W   |
| YOL091W   | 13.7441683 | 13.5259855 | 16.2814189 | 12.3578862 | 15.3118109 | 14.9779797 | -0.03195934  | 3.8561789  | 0.84638291  | SPO21     |
| YPL048W   | 636.243198 | 476.920493 | 616.696569 | 594.124595 | 560.672907 | 536.94766  | -0.032021777 | 9.15577031 | 0.778579983 | CAM1      |
| YDR181C   | 24.0687349 | 24.6345608 | 22.2129395 | 24.1836146 | 23.4563912 | 21.6922464 | -0.032116468 | 4.55482661 | 0.78652172  | SAS4      |
| YCR026C   | 108.703877 | 100.437637 | 106.162114 | 108.146286 | 100.732169 | 99.3582359 | -0.032132346 | 6.70110485 | 0.698599873 | NPP1      |
| YLR136C   | 10.6533745 | 14.3893463 | 16.5840475 | 13.6587163 | 12.6403886 | 14.4614976 | -0.032349787 | 3.7943611  | 0.859502071 | TIS11     |
| YPR063C   | 93.2499075 | 68.6659605 | 84.554432  | 88.2790625 | 74.6043554 | 77.9242305 | -0.032369773 | 6.34564153 | 0.771422473 | YPR063C   |
| YDR147W   | 37.089526  | 44.1465144 | 36.860164  | 39.3205469 | 39.6152385 | 36.6056659 | -0.032423724 | 5.28828362 | 0.76554383  | EKI1      |
| YER105C   | 208.398418 | 210.4298   | 212.626857 | 202.397342 | 213.713787 | 201.298882 | -0.032521068 | 7.70229709 | 0.707411901 | NUP157    |
| YPL161C   | 32.2889313 | 40.347727  | 32.8049407 | 34.8858988 | 32.969261  | 35.3144607 | -0.03258016  | 5.12557749 | 0.780471678 | BEM4      |
| YBR221C   | 761.847798 | 571.602392 | 711.600899 | 662.950334 | 636.971335 | 699.252146 | -0.032647264 | 9.3969028  | 0.770777672 | PDB1      |
| YDL236C   | 66.0246172 | 57.7300573 | 64.3388412 | 55.9356953 | 60.8563039 | 67.0781073 | -0.032721202 | 5.95653161 | 0.737947113 | MTO1      |
| YOR362C   | 147.174396 | 156.613645 | 143.264381 | 148.412891 | 142.106637 | 146.487224 | -0.032849832 | 7.20432568 | 0.694989597 | PRE10     |
| YBL050W   | 54.5163422 | 60.6079266 | 54.1705201 | 58.0643265 | 55.3179893 | 52.1001276 | -0.033008957 | 5.80564856 | 0.722735398 | SEC17     |
| YOL042W   | 29.5927069 | 30.8507584 | 30.0207575 | 27.3174326 | 31.0797184 | 30.0850799 | -0.033194752 | 4.90423887 | 0.761971077 | NGL1      |
| YPR140W   | 56.2261431 | 52.9527943 | 50.9626569 | 49.9045739 | 55.187676  | 51.3899648 | -0.03330521  | 5.72478937 | 0.717217103 | TAZ1      |
| YBL032W   | 297.2423   | 240.58987  | 300.510204 | 280.151506 | 273.788211 | 265.148977 | -0.033315355 | 8.11035733 | 0.744554023 | HEK2      |
| YDL200C   | 9.53542778 | 12.7777395 | 10.9551555 | 11.4118279 | 10.2295928 | 10.9106835 | -0.033372738 | 3.47419998 | 0.853218016 | MGT1      |
| YPR041W   | 424.162132 | 426.960683 | 412.180159 | 450.028094 | 396.087228 | 388.200827 | -0.033390566 | 8.70184641 | 0.721942282 | TIF5      |
| YMR311C   | 37.4840954 | 37.354743  | 42.0048502 | 33.8807119 | 41.9608776 | 38.4133531 | -0.033416728 | 5.27169356 | 0.766271361 | GLC8      |
| YEL013W   | 220.367024 | 164.959466 | 194.166512 | 202.160827 | 184.979707 | 178.896473 | -0.033440589 | 7.57766068 | 0.760338058 | VAC8      |
| YGR027C   | 183.34326  | 233.395197 | 185.087654 | 226.462699 | 190.908962 | 170.63276  | -0.033530924 | 7.63275253 | 0.785365588 | RPS25A    |
| YFR011C   | 15.1251613 | 18.4759206 | 15.3735331 | 14.6639032 | 16.6801004 | 16.5919861 | -0.033538191 | 4.02511867 | 0.833240395 | MIC19     |
| YFL053W   | 9.53542778 | 6.2161976  | 7.2630865  | 6.68153655 | 7.81879707 | 7.94091164 | -0.033557596 | 2.94019791 | 0.887158924 | DAK2      |
| YGR129W   | 7.03648808 | 6.33131237 | 7.5657151  | 7.62759482 | 7.03691736 | 5.7458629  | -0.033575615 | 2.81107473 | 0.866439464 | SYF2      |
| YPR188C   | 17.8871473 | 25.8432659 | 17.7945619 | 24.2427432 | 19.0257395 | 16.8502271 | -0.033611435 | 4.35321951 | 0.854588393 | MLC2      |
| YAR014C   | 121.264337 | 101.876572 | 111.185749 | 110.334046 | 110.179882 | 105.943382 | -0.03375823  | 6.78454    | 0.702357751 | BUD14     |
| YKL148C   | 196.035243 | 160.930449 | 188.356043 | 190.27597  | 182.308285 | 159.980317 | -0.033759235 | 7.48996728 | 0.743710252 | SDH1      |
| YBL071C   | 7.10224965 | 9.20918162 | 8.35254947 | 6.85892247 | 7.88395371 | 9.42579756 | -0.033824931 | 3.04725579 | 0.872410118 | YBL071C   |
| YER027C   | 87.9889818 | 103.718408 | 91.3938384 | 94.6649559 | 93.3649684 | 88.576673  | -0.033907734 | 6.54574941 | 0.708524196 | GAL83     |
| YPL202C   | 28.0144292 | 30.2751846 | 28.6891917 | 24.2427432 | 27.8218862 | 32.9902915 | -0.033910472 | 4.84747489 | 0.796433611 | AFT2      |
| YJL209W   | 50.7679327 | 53.4708108 | 51.9310684 | 51.9740763 | 48.3462286 | 52.2292481 | -0.033928789 | 5.68887374 | 0.705338055 | CBP1      |
| YDL199C   | 25.3839664 | 23.2531836 | 25.0576484 | 24.8340296 | 23.5867045 | 23.4999336 | -0.033932069 | 4.60833228 | 0.763207481 | YDL199C   |
| YMR223W   | 47.6113773 | 51.2260728 | 52.4152742 | 43.5186805 | 51.4737474 | 52.8748507 | -0.03399794  | 5.6430642  | 0.74364087  | UBP8      |
| YOR172W   | 67.9974643 | 65.3276321 | 65.1256756 | 63.7406761 | 67.762908  | 62.3006483 | -0.034064027 | 6.03332319 | 0.688957403 | YRM1      |

|           |            |            |            |            |            |            |              |            |             |         |
|-----------|------------|------------|------------|------------|------------|------------|--------------|------------|-------------|---------|
| YDL169C   | 2.69622441 | 2.35985279 | 2.78418316 | 2.9564321  | 1.95469927 | 2.71153081 | -0.034113209 | 1.43517672 | 0.925017406 | UGX2    |
| YMR164C   | 27.2252903 | 30.1025124 | 28.1444602 | 24.1836146 | 29.2553324 | 30.1496401 | -0.034120348 | 4.82253414 | 0.785104278 | MSS11   |
| YFR002W   | 108.309307 | 135.835429 | 113.485726 | 112.167034 | 118.845715 | 118.403512 | -0.034190108 | 6.88239696 | 0.727515907 | NIC96   |
| YDR318W   | 18.084432  | 17.7276746 | 19.3682307 | 17.2655635 | 16.6801004 | 19.9491195 | -0.03431919  | 4.19386135 | 0.8006273   | MCM21   |
| YCR027C   | 15.8485386 | 18.3032485 | 16.1603675 | 17.679464  | 15.8982207 | 15.559022  | -0.034321205 | 4.06298703 | 0.808004683 | RHB1    |
| YIL050W   | 36.6949565 | 41.5564321 | 38.4943584 | 39.4979329 | 39.0288287 | 35.5081415 | -0.034410645 | 5.27055312 | 0.736453012 | PCL7    |
| YIL064W   | 44.0602525 | 55.888221  | 45.8784964 | 50.2002171 | 47.1082524 | 45.1276198 | -0.034678102 | 5.59071116 | 0.752022965 | EFM4    |
| YML114C   | 55.3712427 | 59.629451  | 55.925766  | 52.4471055 | 55.2528326 | 59.2663162 | -0.034698324 | 5.81864975 | 0.706246097 | TAF8    |
| YDL166C   | 19.9915175 | 22.6200524 | 20.3366422 | 21.8184689 | 21.4365353 | 18.2059925 | -0.034779119 | 4.38350064 | 0.791410869 | FAP7    |
| YBL021C   | 12.100129  | 12.6050673 | 11.5604127 | 13.2448158 | 11.7933522 | 10.3296412 | -0.034811056 | 3.5937874  | 0.818896435 | HAP3    |
| YBR035C   | 84.9639496 | 101.070768 | 81.8307745 | 98.4491889 | 84.1172252 | 78.8926344 | -0.034858569 | 6.46552352 | 0.746737671 | PDX3    |
| YPR144C   | 83.977526  | 94.8545707 | 91.272787  | 77.458521  | 89.3297565 | 97.0340667 | -0.034873486 | 6.47752088 | 0.726811292 | NOC4    |
| YBL035C   | 50.3733633 | 49.2115643 | 47.0284851 | 44.1099669 | 51.0828075 | 47.9682711 | -0.03488445  | 5.59723477 | 0.715226681 | POL12   |
| YDR497C   | 605.532545 | 480.028592 | 554.476128 | 516.666074 | 533.567743 | 550.505314 | -0.034902112 | 9.07743365 | 0.732625075 | ITR1    |
| YLR393W   | 15.5854923 | 16.0585105 | 16.4629961 | 16.023862  | 14.7254012 | 16.2046246 | -0.034939047 | 3.99753091 | 0.792246786 | ATP10   |
| YJR064W   | 355.046721 | 368.079478 | 361.641182 | 377.477251 | 356.08105  | 325.190016 | -0.034974595 | 8.48134894 | 0.705228299 | CCT5    |
| YPR105C   | 95.8803703 | 107.747425 | 100.049016 | 95.3153709 | 100.276072 | 100.907682 | -0.035136856 | 6.64615888 | 0.681263954 | COG4    |
| YJL186W   | 301.122233 | 276.793465 | 287.194545 | 282.930552 | 281.541851 | 279.739595 | -0.035162891 | 8.15484557 | 0.68861285  | MNN5    |
| YBL069W   | 58.1332286 | 63.1404515 | 58.3467948 | 62.4989746 | 55.0573627 | 57.71687   | -0.035193186 | 5.8896563  | 0.698528882 | AST1    |
| YER093C-A | 5.1951641  | 6.2161976  | 5.87099492 | 5.79460922 | 5.8640978  | 5.22938084 | -0.035459037 | 2.54284306 | 0.860419651 | AIM11   |
| YOL159C   | 13.4153605 | 12.0870509 | 12.7709271 | 14.36826   | 11.7281956 | 11.1689245 | -0.035469582 | 3.66905408 | 0.815555058 | YOL159C |
| YDL134C   | 182.09379  | 173.995975 | 178.369299 | 170.349618 | 169.863366 | 181.220642 | -0.035549246 | 7.46026374 | 0.67935992  | PPH21   |
| YKR060W   | 22.0301262 | 24.6345608 | 22.9392482 | 19.7489664 | 25.4110905 | 22.8543311 | -0.035557031 | 4.5270937  | 0.793006589 | UTP30   |
| YDR203W   | 3.74840954 | 4.94993512 | 3.75259469 | 4.31639087 | 4.56096496 | 3.29257312 | -0.035609504 | 2.08330973 | 0.893776176 | YDR203W |
| YPL158C   | 81.21554   | 92.6098327 | 84.4939062 | 90.6442082 | 82.944056  | 78.4407126 | -0.035631695 | 6.41281054 | 0.696618318 | AIM44   |
| YBL036C   | 53.0038261 | 66.0183208 | 57.1968062 | 61.9668168 | 55.9695557 | 54.0369353 | -0.035633273 | 5.86249972 | 0.732276578 | YBL036C |
| Q0130     | 0.26304628 | 0.46045908 | 0.36315432 | 0.23651457 | 0.19546993 | 0.64560257 | -0.035743204 | -1.0432325 | 1           | OLI1    |
| YBR002C   | 42.2846901 | 37.354743  | 45.5758678 | 43.0456514 | 42.4169741 | 36.6056659 | -0.035787548 | 5.36936615 | 0.74324166  | RER2    |
| YBR029C   | 175.714917 | 144.641709 | 162.572086 | 147.703348 | 159.829243 | 163.466571 | -0.035882465 | 7.31370468 | 0.707028298 | CDS1    |
| YHL002W   | 49.8472707 | 59.629451  | 50.8416055 | 49.6089306 | 55.5786159 | 51.3254045 | -0.035937206 | 5.72622198 | 0.72613249  | HSE1    |
| YPR109W   | 30.5791305 | 34.7071032 | 33.0470436 | 31.5746948 | 33.5556708 | 30.859803  | -0.035987788 | 5.02323398 | 0.738375694 | YPR109W |
| YOR147W   | 68.3262721 | 80.695454  | 74.8703166 | 65.2780208 | 76.8848379 | 76.3747843 | -0.036154305 | 6.20682433 | 0.716812377 | MDM32   |
| YGL122C   | 157.301678 | 171.923909 | 175.645642 | 146.875547 | 168.23445  | 177.411587 | -0.036158211 | 7.37811132 | 0.71028858  | NAB2    |
| YDL171C   | 479.007282 | 388.051891 | 463.627021 | 423.301948 | 452.643194 | 421.57848  | -0.036314606 | 8.77524988 | 0.720191629 | GLT1    |
| YKL055C   | 13.7441683 | 14.9649201 | 15.2524816 | 11.884857  | 15.3118109 | 15.7527028 | -0.036339205 | 3.86811292 | 0.827159826 | OAR1    |
| YEL048C   | 13.1523142 | 12.4323952 | 13.6788129 | 12.6535294 | 13.3571117 | 12.2664489 | -0.036401873 | 3.70541078 | 0.80098455  | TCA17   |
| YDL116W   | 97.5901712 | 116.783934 | 101.683211 | 102.233422 | 104.120314 | 101.940646 | -0.036468405 | 6.70317132 | 0.687594554 | NUP84   |
| YML068W   | 19.2023787 | 23.4258558 | 18.218242  | 22.3506267 | 19.2212095 | 17.7540707 | -0.036501956 | 4.33455657 | 0.803871964 | ITT1    |
| YMR029C   | 40.5748892 | 44.1465144 | 41.7022216 | 41.2126635 | 40.071335  | 42.0287275 | -0.03650862  | 5.38385223 | 0.700667618 | FAR8    |
| YFL037W   | 923.48974  | 746.576843 | 838.583862 | 840.277132 | 791.848673 | 813.588362 | -0.036572688 | 9.68971489 | 0.716972098 | TUB2    |
| YOL164W   | 36.4319103 | 36.3762674 | 40.0680272 | 33.52594   | 35.4452134 | 41.1248839 | -0.036780167 | 5.22034683 | 0.74064955  | BDS1    |
| YHR117W   | 146.385257 | 153.85089  | 142.961753 | 142.322641 | 141.585384 | 148.16579  | -0.036822105 | 7.18988543 | 0.657802442 | TOM71   |
| YDR324C   | 158.353863 | 156.49853  | 158.940543 | 147.821605 | 152.271073 | 161.788005 | -0.036840185 | 7.28601009 | 0.661631645 | UTP4    |
| YER156C   | 156.97287  | 165.30481  | 161.058943 | 161.125549 | 156.506255 | 153.524292 | -0.036860426 | 7.31482721 | 0.659673625 | YER156C |
| YJR087W   | 11.179467  | 13.9288872 | 10.834104  | 12.4761435 | 12.6403886 | 9.94227962 | -0.036899352 | 3.58171812 | 0.833680044 | YJR087W |
| YCL057C-A | 42.7450211 | 36.8367265 | 38.4338327 | 42.8091368 | 38.8985154 | 33.1839722 | -0.036996869 | 5.28327159 | 0.744058946 | MIC10   |
| YIR018W   | 17.7556241 | 21.3537899 | 20.6392708 | 19.4533232 | 18.8302696 | 20.0136798 | -0.037068534 | 4.30825952 | 0.782243264 | YAP5    |
| YDR029W   | 4.60330996 | 3.97145957 | 3.38944036 | 3.6659758  | 4.36549503 | 3.61537441 | -0.037123983 | 2.0183878  | 0.885936932 | YDR029W |
| YJR074W   | 33.406878  | 35.6855788 | 33.0470436 | 39.0840324 | 29.7114289 | 30.6661222 | -0.037210945 | 5.07667952 | 0.758840713 | MOG1    |
| YLL031C   | 290.008528 | 242.834608 | 290.644511 | 236.751083 | 274.57009  | 291.16676  | -0.037270032 | 8.08265388 | 0.729783183 | GPI13   |
| YKL205W   | 141.124331 | 163.232744 | 145.988039 | 131.679486 | 152.075603 | 155.267419 | -0.03729537  | 7.21289508 | 0.700550946 | LOS1    |
| YOR007C   | 368.462082 | 407.851631 | 364.364839 | 398.290533 | 371.588331 | 341.652881 | -0.037335163 | 8.55270647 | 0.699321192 | SGT2    |
| YGR202C   | 59.7772679 | 60.7230413 | 60.8283494 | 58.4190983 | 58.7712913 | 59.5245572 | -0.03736564  | 5.90206326 | 0.656293736 | PCT1    |
| YDR027C   | 90.6194447 | 96.4661775 | 90.9096326 | 93.4232544 | 91.4799257 | 85.9942627 | -0.037366229 | 6.51751811 | 0.654943207 | VPS54   |
| YDR161W   | 70.1675961 | 71.0258133 | 65.1862013 | 65.6919213 | 68.0235345 | 67.4009086 | -0.037423595 | 6.08828524 | 0.660780652 | YDR161W |
| YDL042C   | 52.1489257 | 61.8166316 | 53.2021086 | 50.9688894 | 53.1678201 | 58.8789546 | -0.037483936 | 5.78560495 | 0.715060397 | SIR2    |
| YDR239C   | 41.6928359 | 37.354743  | 42.9732618 | 36.6006294 | 38.8985154 | 43.3844929 | -0.037627876 | 5.33134811 | 0.724212664 | YDR239C |
| YIL069C   | 333.148118 | 337.574064 | 315.27848  | 377.299865 | 320.96162  | 261.920964 | -0.038138164 | 8.34211451 | 0.749229469 | RPS24B  |
| YGR276C   | 53.1353493 | 57.6149425 | 55.6836631 | 53.3931637 | 55.2528326 | 53.5204533 | -0.038146438 | 5.7786461  | 0.665300977 | RNH70   |
| YGR056W   | 76.8095148 | 85.1273726 | 79.1676428 | 78.7593512 | 79.0350071 | 77.0849472 | -0.038198408 | 6.31223362 | 0.649457454 | RSC1    |
| YFL049W   | 39.1938962 | 43.2831536 | 40.4311815 | 38.0784855 | 40.3971182 | 41.3185646 | -0.038200943 | 5.34262765 | 0.698818231 | SWP82   |
| YBR288C   | 66.0246172 | 84.7820283 | 71.9045563 | 74.3838316 | 71.4768366 | 71.1454035 | -0.038205653 | 6.19837045 | 0.704930929 | APM3    |
| YNL052W   | 84.1748107 | 80.6378966 | 81.7097231 | 84.6722154 | 83.2050322 | 72.1138074 | -0.038232601 | 6.3436346  | 0.667067165 | COX5A   |
| YBR153W   | 20.386087  | 25.9583807 | 21.3655794 | 23.9471    | 19.8076192 | 22.2087285 | -0.038361954 | 4.48718106 | 0.781977321 | RIB7    |
| YBR166C   | 53.2668724 | 74.9397155 | 55.0178802 | 56.3495958 | 61.9639668 | 60.23472   | -0.038539943 | 5.91743766 | 0.756890015 | TYR1    |
| YHR115C   | 95.0254699 | 81.6739295 | 96.4779989 | 89.1068635 | 88.2209396 | 88.5121127 | -0.038739448 | 6.49107878 | 0.662987602 | DMA1    |
| YEL017C-A | 1.64403927 | 1.5540494  | 0.60525721 | 1.53734469 | 0.97734963 | 1.16208463 | -0.038744687 | 0.45710642 | 0.946212272 | PMP2    |
| YOR185C   | 43.7972062 | 49.569086  | 41.3390673 | 46.2385981 | 42.2215042 | 42.6743301 | -0.038767737 | 5.47390319 | 0.704689497 | GSP2    |
| YPL262W   | 283.563894 | 236.733525 | 273.999938 | 276.781173 | 248.898373 | 247.394906 | -0.03878544  | 8.02982912 | 0.696626353 | FUM1    |
| YBR271W   | 41.6928359 | 42.4773502 | 41.1574901 | 42.6317509 | 39.7455518 | 39.5754377 | -0.038952624 | 5.36962191 | 0.676267496 | EFM2    |
| YBL023C   | 78.6508388 | 78.4507159 | 78.6229113 | 80.0601813 | 75.9726449 | 73.3404523 | -0.039046747 | 6.27884345 | 0.633962089 | MCM2    |
| YLR353W   | 84.0432876 | 83.5733232 | 89.0333353 | 77.6950356 | 91.3496125 | 80.8294421 | -0.039050098 | 6.40153235 | 0.664366749 | BUD8    |
| YHL003C   | 189.393324 | 164.326335 | 194.892821 | 175.434681 | 177.486694 | 180.962401 | -0.03908673  | 7.49609279 | 0.675219153 | LAG1    |

|           |            |            |             |            |            |            |              |            |             |           |
|-----------|------------|------------|-------------|------------|------------|------------|--------------|------------|-------------|-----------|
| YGR072W   | 19.9915175 | 23.8863148 | 22.9997739  | 23.4149422 | 19.8727759 | 21.821367  | -0.039154974 | 4.46870423 | 0.762986179 | UPF3      |
| YNR007C   | 12.8892679 | 11.9143787 | 11.6814641  | 12.1213716 | 12.2494487 | 11.1043642 | -0.039156843 | 3.59870493 | 0.794392118 | ATG3      |
| YJR055W   | 5.65549509 | 5.8132959  | 4.41837762  | 5.08506321 | 5.0822181  | 5.2939411  | -0.039217805 | 2.41908898 | 0.856897859 | HIT1      |
| YDR280W   | 38.9966115 | 48.6359904 | 38.796987   | 42.276979  | 43.1336972 | 37.7031902 | -0.03922278  | 5.38312742 | 0.735040461 | RRP45     |
| YDR211W   | 162.036511 | 193.162585 | 177.037733  | 175.139038 | 172.599945 | 170.309959 | -0.039261013 | 7.45276913 | 0.672465887 | GCD6      |
| YLR067C   | 52.7407798 | 56.6940244 | 56.4704975  | 52.3879768 | 52.5814103 | 56.5547854 | -0.039312777 | 5.77347442 | 0.662173727 | PET309    |
| YKL021C   | 67.1425639 | 84.8395857 | 79.2281685  | 74.6794749 | 72.3238729 | 78.1179113 | -0.039399981 | 6.25170397 | 0.691017965 | MAK11     |
| YIR005W   | 2.23589341 | 3.16565618 | 2.54208027  | 2.01037383 | 3.25783211 | 2.51785003 | -0.039441509 | 1.45741836 | 0.929598349 | IST3      |
| YHR102W   | 94.4336158 | 84.436684  | 92.6043528  | 74.2655744 | 97.80012   | 92.1274871 | -0.039567531 | 6.48183537 | 0.709167482 | KIC1      |
| YHR083W   | 112.320763 | 108.207884 | 105.133177  | 112.994835 | 98.4516865 | 105.233219 | -0.039825001 | 6.74398033 | 0.642677854 | SAM35     |
| YKL018C-A | 5.91854138 | 5.46795159 | 6.29467496  | 6.20850741 | 4.82159153 | 6.13322444 | -0.040128291 | 2.56915046 | 0.845854633 | YKL018C-A |
| YOR154W   | 37.3525723 | 42.592465  | 38.8575128  | 36.6006294 | 38.7030455 | 40.3501608 | -0.040144873 | 5.29298942 | 0.695095671 | SLP1      |
| YOR169C   | 39.9830351 | 37.1245134 | 37.283844   | 46.1794694 | 33.881454  | 31.0534837 | -0.040203396 | 5.23754393 | 0.763727907 | YOR169C   |
| YOL022C   | 51.7543563 | 72.1194036 | 51.3258112  | 55.5809235 | 57.9894116 | 56.9421469 | -0.040221533 | 5.85214422 | 0.747661811 | TSR4      |
| YDL084W   | 1108.67432 | 1076.20799 | 1088.55509  | 1087.78963 | 1053.71322 | 1041.80887 | -0.040256912 | 10.0717978 | 0.651690964 | SUB2      |
| YLR340W   | 4337.8305  | 3508.12262 | 4051.04702  | 4138.76843 | 3857.46869 | 3572.63552 | -0.040331057 | 11.9333564 | 0.705141335 | RPP0      |
| YBR248C   | 111.268578 | 110.625294 | 110.03576   | 109.74276  | 106.856893 | 106.137063 | -0.040376011 | 6.7713299  | 0.612053905 | HIS7      |
| YGR168C   | 13.3495989 | 17.4974451 | 16.2814189  | 13.2448158 | 16.7452571 | 15.9463835 | -0.040378371 | 3.96722995 | 0.813145271 | YGR168C   |
| YBL065W   | 0.78913885 | 0.46045908 | 1.08946297  | 0.76867235 | 0.71672306 | 0.77472309 | -0.040647787 | -0.1709923 | 0.92081603  | YBL065W   |
| YJL024C   | 14.7963534 | 23.5985279 | 17.4919333  | 16.4377625 | 19.4166794 | 18.5933541 | -0.040683799 | 4.21210009 | 0.825304341 | APS3      |
| YGR119C   | 140.532477 | 131.921527 | 136.06182   | 120.385915 | 131.095164 | 145.712501 | -0.040688348 | 7.07033919 | 0.658767342 | NUP57     |
| YDR517W   | 118.568112 | 107.459638 | 118.327784  | 99.1587327 | 113.568027 | 122.083446 | -0.040727765 | 6.82400789 | 0.670461039 | GRH1      |
| YKR018C   | 209.976696 | 210.947817 | 192.592844  | 210.793609 | 196.316963 | 189.226114 | -0.040820766 | 7.65659227 | 0.653773671 | YKR018C   |
| YLR084C   | 237.333509 | 207.78216  | 237.079248  | 194.060203 | 227.526995 | 241.584483 | -0.040858556 | 7.80947441 | 0.695660332 | RAX2      |
| YNL116W   | 66.6822329 | 65.4427469 | 67.7888073  | 63.267647  | 65.6127388 | 65.4641009 | -0.040877302 | 6.04070265 | 0.622605443 | DMA2      |
| YLR254C   | 6.57615709 | 8.1155913  | 6.77888073  | 8.33713852 | 6.71113415 | 5.81042315 | -0.040891899 | 2.84773257 | 0.859404978 | NDL1      |
| YDR488C   | 40.1803198 | 36.8942839 | 37.9496269  | 39.2614183 | 36.2922497 | 36.1537441 | -0.040925383 | 5.2446089  | 0.672585099 | PAC11     |
| YGR166W   | 33.9987321 | 48.117974  | 41.0364387  | 37.9605882 | 38.8333588 | 43.0616916 | -0.040936452 | 5.34509107 | 0.749916711 | TRS65     |
| YDL014W   | 970.509263 | 737.137432 | 971.256242  | 893.611167 | 852.835291 | 857.231096 | -0.041024271 | 9.78224168 | 0.717427821 | NOP1      |
| YLL046C   | 0.460331   | 0.23022954 | 0.842420577 | 0.41390049 | 0.19546993 | 0.51648206 | -0.041160018 | -0.9827322 | 1           | RNP1      |
| YFR033C   | 84.1748107 | 82.3070608 | 82.3149803  | 96.6753297 | 75.581705  | 69.4022766 | -0.04116589  | 6.35556827 | 0.710033224 | QCR6      |
| YDL019C   | 210.568855 | 171.866352 | 194.711244  | 191.990701 | 189.996769 | 178.767352 | -0.041214039 | 7.56804374 | 0.67127785  | OSH2      |
| YDR453C   | 7.36529594 | 7.25223053 | 6.89993217  | 8.33713852 | 6.90660408 | 5.61674238 | -0.041399707 | 2.84744571 | 0.838270852 | TSA2      |
| YOL051W   | 169.993661 | 178.830796 | 180.911379  | 146.047746 | 181.396092 | 187.418427 | -0.041475553 | 7.44470816 | 0.69044442  | GAL11     |
| YEL006W   | 57.9359439 | 53.8161551 | 56.7126004  | 55.1078944 | 55.8392424 | 52.6811699 | -0.041484752 | 5.79362026 | 0.63336999  | YEA6      |
| YKL166C   | 35.8400561 | 39.8297105 | 37.1022668  | 37.487559  | 35.9013099 | 36.2183043 | -0.04156973  | 5.21716782 | 0.673640803 | TPK3      |
| YLR016W   | 81.21554   | 86.5087499 | 85.5228435  | 73.6742879 | 86.4628643 | 86.0588229 | -0.04159591  | 6.38128199 | 0.649339578 | SW1       |
| YER125W   | 286.391641 | 222.574408 | 265.647389  | 259.219967 | 254.342997 | 254.883896 | -0.041602375 | 7.99219767 | 0.690881066 | RSP5      |
| YGL010W   | 14.2044993 | 11.1085753 | 13.0735557  | 10.7022842 | 12.2494487 | 14.3323771 | -0.041622537 | 3.66837938 | 0.817735752 | MP01      |
| YJR044C   | 34.9193941 | 27.8577744 | 34.3786094  | 25.3661874 | 30.9494051 | 38.0905518 | -0.041650808 | 5.00092168 | 0.779840267 | VPS55     |
| YLR076C   | 11.4425133 | 11.9143787 | 10.5920011  | 6.91805112 | 10.750846  | 15.3653412 | -0.04165998  | 3.49383584 | 0.874341125 | YLR076C   |
| YHR181W   | 74.5078598 | 69.1264196 | 75.2939967  | 63.6815474 | 68.3493177 | 80.7003216 | -0.041684543 | 6.17099362 | 0.677621123 | SVP26     |
| YLR151C   | 10.9164208 | 10.0725424 | 11.3183098  | 11.1753133 | 9.9380962  | 10.2650809 | -0.041712057 | 3.42424334 | 0.792368877 | PCD1      |
| YDR021W   | 13.5468836 | 16.5189695 | 15.3735331  | 14.1908741 | 13.3042997 | 15.6235823 | -0.041719554 | 3.91418474 | 0.785764037 | FAL1      |
| YNL272C   | 84.2405723 | 80.8105687 | 82.5570832  | 82.0114265 | 82.0322126 | 76.4393446 | -0.041773158 | 6.34824331 | 0.610247415 | SEC2      |
| YDR418W   | 895.343787 | 918.09785  | 878.954517  | 1027.2419  | 824.817934 | 763.360482 | -0.041792132 | 9.78918089 | 0.711365561 | RPL12B    |
| YLR278C   | 164.009358 | 167.434433 | 167.414144  | 153.379697 | 165.302401 | 165.984421 | -0.041851744 | 7.35792328 | 0.62429228  | YLR278C   |
| YGL204C   | 4.53754839 | 4.08657433 | 3.99469757  | 4.37551951 | 4.56096496 | 3.29257312 | -0.042078405 | 2.09239292 | 0.861609926 | YGL204C   |
| YKL015W   | 82.0046789 | 86.5663075 | 76.080831   | 82.1296838 | 78.7092239 | 76.7621459 | -0.042123613 | 6.33105427 | 0.625156034 | PUT3      |
| YHR159W   | 21.2409874 | 22.6776097 | 23.4839797  | 22.4097553 | 21.7623185 | 21.3048849 | -0.042168334 | 4.47759847 | 0.72095326  | TDA11     |
| YIL014W   | 92.8553381 | 84.8971431 | 89.093861   | 86.0913028 | 86.5931776 | 86.3816242 | -0.042292021 | 6.4556537  | 0.604758628 | MNT3      |
| YNL306W   | 53.9902497 | 64.7520583 | 53.8073658  | 63.4450329 | 52.2556271 | 51.8418866 | -0.042378198 | 5.82869672 | 0.70074315  | MRPS18    |
| YNL184C   | 2.36741655 | 1.72672155 | 1.57366874  | 1.59647333 | 2.21532584 | 1.67856669 | -0.042383132 | 0.98139661 | 0.908287597 | YNL184C   |
| YGL202W   | 586.06712  | 434.558258 | 548.423556  | 486.510466 | 529.267405 | 507.701863 | -0.042431631 | 9.00987797 | 0.706631281 | ARO8      |
| YDR511W   | 18.7420477 | 18.6485928 | 17.128779   | 19.0985514 | 17.0710403 | 16.7211066 | -0.042450824 | 4.17250904 | 0.743567949 | SDH7      |
| YHR201C   | 66.353425  | 73.1554365 | 75.4755738  | 77.1037492 | 68.6099443 | 63.0108111 | -0.042463444 | 6.14492813 | 0.663596799 | PPX1      |
| YHR213W-A | 0.52609257 | 0.17267216 | 0.48420577  | 0.41390049 | 0.39093985 | 0.32280129 | -0.04247106  | -0.9824457 | 1           | YHR213W-A |
| YDR495C   | 38.7993268 | 43.4558258 | 37.1627926  | 39.970962  | 37.6605392 | 38.3487928 | -0.042477533 | 5.29898593 | 0.675987457 | VPS3      |
| YCL029C   | 37.3525723 | 33.325726  | 36.7391125  | 34.7676415 | 35.3149001 | 34.1523761 | -0.042544134 | 5.14538777 | 0.666960307 | BK1       |
| YHR025W   | 445.205835 | 340.106589 | 441.898288  | 387.233477 | 403.254459 | 400.919198 | -0.042605511 | 8.6553701  | 0.698338172 | THR1      |
| YNL133C   | 3.48536326 | 3.8563448  | 2.96576032  | 4.90767729 | 2.21532584 | 2.84065132 | -0.04268363  | 1.81647256 | 0.901394372 | FVY6      |
| YMR262W   | 25.9758205 | 28.4333483 | 23.1813511  | 26.6670175 | 25.7368737 | 22.9188913 | -0.042686248 | 4.67921685 | 0.730956446 | YMR262W   |
| YBR133C   | 173.479024 | 140.037118 | 151.072199  | 145.515588 | 154.551555 | 150.748201 | -0.043067856 | 7.25427564 | 0.649360709 | HSL7      |
| YER139C   | 6.57615709 | 8.86383731 | 4.78153194  | 7.56846618 | 5.34284467 | 6.71426676 | -0.043269117 | 2.76249029 | 0.880125084 | RTR1      |
| YOR160W   | 138.756915 | 118.107754 | 128.072425  | 129.018697 | 122.689957 | 121.696085 | -0.04329187  | 6.98306627 | 0.62267161  | MTR10     |
| YGR029W   | 28.343237  | 28.2031187 | 26.3892143  | 30.392122  | 24.4337408 | 25.5658619 | -0.043405089 | 4.77387978 | 0.714210813 | ERV1      |
| YBR179C   | 58.3962749 | 60.6079266 | 51.8705427  | 52.6244914 | 55.9695557 | 57.2649482 | -0.043435484 | 5.81362223 | 0.646477164 | FZ01      |
| YNR026C   | 42.8765442 | 50.9958432 | 44.9100848  | 44.3464815 | 46.5218426 | 43.9009749 | -0.043529716 | 5.51501029 | 0.662557275 | SEC12     |
| YOR148C   | 13.3495989 | 12.8928543 | 11.8025156  | 13.0674299 | 12.575232  | 11.2334848 | -0.043566624 | 3.65684757 | 0.77813259  | SPP2      |
| YKR065C   | 110.413677 | 89.9046356 | 102.893725  | 88.5155771 | 100.145759 | 105.49146  | -0.043588306 | 6.63893693 | 0.66400078  | PAM17     |
| YLR357W   | 110.676724 | 109.128802 | 113.667304  | 104.184667 | 114.154437 | 105.233219 | -0.043649882 | 6.77647237 | 0.59899929  | RSC2      |
| YGR098C   | 104.889706 | 109.071245 | 100.654274  | 99.6908904 | 102.686868 | 102.90905  | -0.043652167 | 6.69268502 | 0.593146034 | ESP1      |
| YNR052C   | 103.969044 | 112.812475 | 104.346343  | 89.2842494 | 103.794531 | 118.597193 | -0.043745958 | 6.72224853 | 0.674754473 | POP2      |

|           |            |            |            |            |            |            |              |            |             |           |
|-----------|------------|------------|------------|------------|------------|------------|--------------|------------|-------------|-----------|
| YKR096W   | 104.758182 | 98.9411451 | 98.5963992 | 94.310184  | 100.797326 | 98.131591  | -0.043834937 | 6.63476686 | 0.594100798 | ESL2      |
| YOR173W   | 18.0186704 | 18.6485928 | 15.4945845 | 18.4481363 | 16.8755703 | 15.2362207 | -0.043977532 | 4.10878504 | 0.752184363 | DCS2      |
| YDR285W   | 10.3245666 | 11.2236901 | 12.0446184 | 9.87448322 | 10.8811593 | 11.8790873 | -0.044063231 | 3.48049169 | 0.79183552  | ZIP1      |
| YDR479C   | 65.5642862 | 60.8957135 | 62.4625439 | 63.3267756 | 62.6806899 | 57.1358277 | -0.044103192 | 5.95730655 | 0.612460416 | PEX29     |
| YIR036W-A | 6.37887237 | 6.27375498 | 7.38413794 | 6.14937877 | 7.23238729 | 6.06866418 | -0.044107165 | 2.74479846 | 0.815513433 | YIR036W-A |
| YPR177C   | 3.22231697 | 3.05054141 | 2.54208027 | 3.01556074 | 3.12751883 | 2.38872952 | -0.044214387 | 1.59210363 | 0.89424     | YPR177C   |
| YKL047W   | 33.9987321 | 47.4848427 | 37.1022668 | 38.7883892 | 37.6605392 | 38.6715941 | -0.044226915 | 5.28914119 | 0.724398973 | ANR2      |
| YBR220C   | 109.295731 | 90.5953242 | 100.593748 | 89.1659922 | 98.1259032 | 104.071135 | -0.044254621 | 6.62560498 | 0.64538753  | YBR220C   |
| YKL038W   | 140.072146 | 124.554181 | 136.4855   | 119.676371 | 137.350202 | 131.961166 | -0.044286121 | 7.04210367 | 0.622360313 | RGT1      |
| YNL256W   | 117.384404 | 121.446083 | 131.098711 | 122.33716  | 118.650246 | 117.757909 | -0.044341803 | 6.9257363  | 0.59805972  | FOL1      |
| YLR238W   | 18.2817167 | 19.3968388 | 16.8261504 | 19.0985514 | 16.940727  | 16.7856669 | -0.044435566 | 4.17175517 | 0.738135127 | FAR10     |
| YGR283C   | 27.5540982 | 37.7576447 | 31.1707462 | 26.0757311 | 31.3403449 | 36.2828646 | -0.044471791 | 4.99226276 | 0.765871962 | YGR283C   |
| YAL008W   | 31.8943619 | 34.4193163 | 29.2944489 | 35.4180566 | 29.4508023 | 27.7609106 | -0.044747487 | 4.9780119  | 0.711509106 | FUN14     |
| YGL054C   | 63.9860085 | 66.0758781 | 76.3229339 | 55.6400521 | 65.3521122 | 79.1508754 | -0.045077483 | 6.08466263 | 0.713771625 | ERV14     |
| YMR203W   | 418.901206 | 325.487013 | 375.864726 | 346.789485 | 358.100906 | 380.647277 | -0.045284551 | 8.5225083  | 0.665530641 | TOM40     |
| YBR112C   | 274.488797 | 267.411611 | 296.818135 | 245.383864 | 290.207685 | 277.157184 | -0.045513843 | 8.10516512 | 0.638650281 | CYC8      |
| YNL288W   | 97.458648  | 79.3140767 | 96.0543189 | 85.3226304 | 85.8112979 | 93.095891  | -0.045715166 | 6.48570134 | 0.635440529 | CAF40     |
| YER178W   | 1049.02858 | 819.041591 | 1025.42676 | 939.021964 | 899.487446 | 964.530244 | -0.045764977 | 9.8910695  | 0.672436943 | PDA1      |
| YBR247C   | 98.839641  | 103.660851 | 107.07     | 92.2998102 | 102.035302 | 105.685141 | -0.045794084 | 6.66846265 | 0.600335474 | ENP1      |
| YOL092W   | 190.840079 | 153.102644 | 194.348089 | 149.831979 | 169.79821  | 201.815364 | -0.045864677 | 7.46530315 | 0.707650534 | YQP1      |
| YGL203C   | 175.714917 | 137.447036 | 162.995766 | 162.012479 | 151.228567 | 147.842989 | -0.04587556  | 7.28834798 | 0.647041997 | KEY1      |
| YDR364C   | 41.1667434 | 47.081941  | 42.9732618 | 38.7883892 | 44.1762035 | 44.2883365 | -0.0459145   | 5.43314411 | 0.654733144 | CDC40     |
| YNL258C   | 68.9838878 | 79.8896506 | 71.7229791 | 74.9751181 | 71.6071498 | 67.1426676 | -0.045974865 | 6.18048244 | 0.614842425 | DSL1      |
| YHR002W   | 16.8349621 | 17.6125599 | 15.0709045 | 15.6690901 | 17.2013536 | 15.1071002 | -0.046169856 | 4.03330712 | 0.742360893 | LEU5      |
| YCR045C   | 46.4934306 | 37.4698577 | 44.2443019 | 40.0300906 | 42.1563475 | 41.899607  | -0.046211275 | 5.39766839 | 0.658862174 | RR12      |
| YDL216C   | 13.2180757 | 11.9719361 | 13.9209158 | 12.1805003 | 12.6403886 | 13.041172  | -0.046462235 | 3.69455447 | 0.752446497 | RR11      |
| YAL003W   | 1471.48091 | 1484.23229 | 1361.52609 | 1576.84263 | 1336.29758 | 1267.05961 | -0.046503544 | 10.4679925 | 0.657035288 | EFB1      |
| YMR312W   | 61.9473998 | 50.3051546 | 61.0099266 | 48.3672292 | 59.0970745 | 60.2992803 | -0.046548138 | 5.83123499 | 0.679748397 | ELP6      |
| YFR010W   | 123.039899 | 151.606152 | 123.169842 | 131.147328 | 127.902489 | 126.215303 | -0.046617926 | 7.02964661 | 0.631145146 | UBP6      |
| YER118C   | 119.423013 | 109.243917 | 114.393612 | 104.95334  | 111.352702 | 115.821102 | -0.046666579 | 6.81562524 | 0.581077859 | SHO1      |
| YER113C   | 125.473077 | 116.208361 | 122.685636 | 108.85583  | 120.474632 | 123.439212 | -0.046759137 | 6.90248424 | 0.589745474 | TMN3      |
| YMR163C   | 44.1260141 | 45.9883507 | 43.4574675 | 39.8527047 | 48.6720118 | 40.8666428 | -0.046804341 | 5.45767852 | 0.65437117  | INP2      |
| YER165W   | 1705.78939 | 1580.9287  | 1557.3268  | 1624.14554 | 1564.0852  | 1500.96142 | -0.04684496  | 10.6338987 | 0.613929314 | PAB1      |
| YHL009C   | 17.4268163 | 17.9003468 | 19.0050763 | 18.2707504 | 18.3090165 | 16.0109438 | -0.046865742 | 4.16598359 | 0.722719171 | YAP3      |
| YKL054C   | 290.271574 | 295.039156 | 294.33658  | 257.505236 | 293.074577 | 301.04448  | -0.046867789 | 8.17323565 | 0.615956258 | DEF1      |
| YPR168W   | 9.40390463 | 8.63360777 | 8.17097231 | 9.9927405  | 7.81879707 | 7.48898984 | -0.046912161 | 3.1236997  | 0.792807933 | NUT2      |
| YOL123W   | 235.492185 | 257.339069 | 255.963273 | 251.414986 | 235.280635 | 238.162789 | -0.046917465 | 7.94103079 | 0.600945291 | HRP1      |
| YJR003C   | 47.808662  | 61.0108283 | 51.6284398 | 49.4906734 | 52.0601572 | 53.9078148 | -0.046993817 | 5.72219715 | 0.659548716 | YJR003C   |
| YDL145C   | 960.053173 | 766.088796 | 922.048831 | 819.759493 | 857.005316 | 886.476892 | -0.046993959 | 9.76267238 | 0.652616535 | COP1      |
| YDR208W   | 130.997049 | 151.893939 | 139.269684 | 138.834051 | 136.047069 | 133.833413 | -0.04700489  | 7.11497987 | 0.591019795 | MSS4      |
| YML083C   | 6.64191866 | 6.33131237 | 7.5657151  | 6.26763605 | 7.29754393 | 6.32690521 | -0.04705677  | 2.77799958 | 0.817651795 | YML083C   |
| YKL019W   | 92.7238149 | 79.7169784 | 85.2807406 | 82.5435842 | 81.1851763 | 85.6069011 | -0.047089135 | 6.40296447 | 0.586424331 | RAM2      |
| YGL078C   | 171.966508 | 179.003468 | 171.832521 | 175.198166 | 168.364764 | 162.433607 | -0.047100674 | 7.42289978 | 0.583349077 | BDP3      |
| YIR037W   | 112.518048 | 88.177914  | 88.8517581 | 94.5466986 | 89.785853  | 95.7428615 | -0.047170376 | 6.57049605 | 0.643130375 | HYR1      |
| YJL213W   | 23.7399271 | 21.9293637 | 23.3024025 | 23.3558136 | 22.5441982 | 20.7884028 | -0.047260669 | 4.50680694 | 0.685026062 | YJL213W   |
| YPR156C   | 186.039484 | 144.699266 | 174.071973 | 176.203353 | 155.724375 | 156.429503 | -0.0472778   | 7.37193384 | 0.651854511 | TPO3      |
| YGR094W   | 1342.45671 | 1199.20812 | 1281.81371 | 1247.49609 | 1255.24271 | 1197.33453 | -0.047300781 | 10.2923699 | 0.610695949 | VAS1      |
| YLR114C   | 150.133666 | 137.447036 | 144.232793 | 152.729282 | 140.868661 | 124.149375 | -0.047308444 | 7.14691883 | 0.615984638 | AVL9      |
| YKL036C   | 1.64403927 | 0.74824601 | 1.08946297 | 1.06431556 | 0.97734963 | 1.29120515 | -0.04732561  | 0.32281365 | 0.938912308 | YKL036C   |
| YJL168C   | 79.834547  | 79.2565193 | 75.1124195 | 77.9315502 | 75.3210785 | 73.3404523 | -0.047332075 | 6.26541376 | 0.564905801 | SET2      |
| YOR260W   | 273.962704 | 267.814513 | 291.068191 | 255.021833 | 262.646425 | 288.326109 | -0.047344328 | 8.09412744 | 0.608077182 | GCD1      |
| YKR026C   | 50.2418401 | 69.2415343 | 56.4099718 | 54.1027074 | 56.2953389 | 59.976479  | -0.047363838 | 5.85440416 | 0.683114548 | GCN3      |
| YKL198C   | 75.4285218 | 51.3411875 | 71.3598248 | 62.0850741 | 65.2869555 | 64.237456  | -0.047435659 | 6.0235206  | 0.699106374 | PTK1      |
| YJL080C   | 1024.43375 | 835.330331 | 1044.18974 | 908.038555 | 947.377579 | 954.200602 | -0.04761102  | 9.895376   | 0.648779395 | SCP160    |
| YPR181C   | 851.152012 | 672.155144 | 859.465235 | 688.434779 | 776.536862 | 840.380869 | -0.047638407 | 9.61001003 | 0.682872158 | SEC23     |
| YDR132C   | 14.7305919 | 16.8643138 | 15.9182646 | 15.0186751 | 15.8330641 | 15.1716605 | -0.047654583 | 3.97458221 | 0.7365231   | YDR132C   |
| YMR177W   | 37.4183338 | 41.4413173 | 33.591775  | 39.4979329 | 35.5755267 | 33.7004543 | -0.047690364 | 5.20986281 | 0.670785196 | MMT1      |
| YBR163W   | 65.893094  | 75.918191  | 64.3388412 | 65.6327926 | 70.6949569 | 63.2044919 | -0.047773674 | 6.08209118 | 0.617167128 | EXO5      |
| YDR053W   | 3.41960169 | 2.87786926 | 2.11840023 | 2.42427432 | 2.80173562 | 2.90521158 | -0.047797269 | 1.5227298  | 0.894910816 | YDR053W   |
| YNL004W   | 78.6508388 | 82.191946  | 76.4439854 | 77.3402637 | 75.7120183 | 76.5039049 | -0.047883591 | 6.28423101 | 0.557675189 | HRB1      |
| YAL051W   | 72.6665358 | 79.8320932 | 74.0834823 | 70.0674408 | 71.9980897 | 77.2140677 | -0.047969436 | 6.21798332 | 0.58195819  | OAF1      |
| YCR031C   | 1314.90261 | 1051.68854 | 1202.10134 | 1113.39233 | 1121.34581 | 1217.08997 | -0.04799695  | 10.1925267 | 0.645282366 | RPS14A    |
| YFR040W   | 191.826502 | 193.507929 | 183.392934 | 173.424307 | 192.798504 | 183.932173 | -0.048048639 | 7.54380084 | 0.588758442 | SAP155    |
| YDR374W-A | 2.76198598 | 5.23772205 | 3.63154325 | 3.84336173 | 3.90939854 | 3.55081415 | -0.048140507 | 1.98744878 | 0.874058678 | WIP1      |
| YER171W   | 76.0203759 | 77.5873552 | 71.7835049 | 73.8516739 | 71.6723065 | 72.4366086 | -0.048274728 | 6.20984298 | 0.55894794  | RAD3      |
| YNR058W   | 14.4675456 | 13.1806412 | 12.7104014 | 10.6431556 | 14.204148  | 14.2032566 | -0.048757477 | 3.73771243 | 0.774793434 | BIO3      |
| YJL051W   | 79.4399776 | 73.7310104 | 78.683437  | 76.808106  | 75.2559218 | 71.9846868 | -0.048848297 | 6.24995145 | 0.556240305 | IRC8      |
| YOR301W   | 56.8837588 | 50.929415  | 55.4415602 | 52.0923336 | 52.1904705 | 53.1330917 | -0.048907873 | 5.74161208 | 0.583047452 | RAX1      |
| YDR164C   | 62.4077308 | 74.7670433 | 60.1625665 | 63.1493897 | 63.9186661 | 63.7855342 | -0.048967988 | 6.01872544 | 0.620417814 | SEC1      |
| YMR038C   | 104.626659 | 108.265441 | 110.762069 | 103.415995 | 103.338435 | 106.137063 | -0.048990454 | 6.73089891 | 0.543100503 | CCS1      |
| YOR206W   | 208.06961  | 224.416245 | 223.279384 | 200.386968 | 218.209595 | 215.308458 | -0.0491577   | 7.74867234 | 0.583209946 | NOC2      |
| YKL028W   | 80.1633549 | 87.5447828 | 78.6229113 | 89.6390213 | 79.6865735 | 68.6921137 | -0.049208263 | 6.33753088 | 0.630787    | TFA1      |
| YML010W   | 374.2491   | 341.257737 | 375.017366 | 338.393218 | 358.557002 | 356.889102 | -0.049339166 | 8.48183224 | 0.584709477 | SPT5      |

|           |            |            |            |            |            |            |              |            |             |         |
|-----------|------------|------------|------------|------------|------------|------------|--------------|------------|-------------|---------|
| YPL117C   | 86.8052735 | 125.878001 | 96.7806276 | 106.608942 | 99.0380962 | 93.4832525 | -0.049480881 | 6.6666828  | 0.68437096  | ID11    |
| YML062C   | 23.8056887 | 24.1165444 | 25.2997513 | 23.296685  | 23.5215479 | 23.9518554 | -0.04948883  | 4.59242038 | 0.65919614  | MFT1    |
| YMR168C   | 31.565554  | 30.2176272 | 31.1707462 | 27.0217894 | 30.6236219 | 32.2155684 | -0.049539425 | 4.93463723 | 0.65389527  | CEP3    |
| YIR010W   | 55.7000505 | 54.2766142 | 50.7810797 | 55.3444089 | 51.9950005 | 47.9037109 | -0.049553442 | 5.72235539 | 0.595518198 | DSN1    |
| YDR030C   | 9.4696662  | 10.1876572 | 9.19990956 | 9.2831968  | 9.2522432  | 9.3612373  | -0.049629665 | 3.26105927 | 0.768531675 | RAD28   |
| YEL077C   | 122.776853 | 106.135818 | 118.327784 | 114.354794 | 117.151643 | 103.877454 | -0.049644475 | 6.83145706 | 0.581502408 | YEL077C |
| YPL103C   | 39.4569425 | 35.8582509 | 37.3443697 | 34.8858988 | 36.8786595 | 37.0575877 | -0.049649226 | 5.21055392 | 0.610161617 | FMP30   |
| YKR044W   | 52.411972  | 44.7220883 | 47.3916394 | 42.3361077 | 45.5444929 | 51.7127661 | -0.04985714  | 5.56857216 | 0.635829072 | UIP5    |
| YKL125W   | 68.5893184 | 85.6453891 | 74.5071623 | 71.9595573 | 73.1057526 | 76.0519831 | -0.049895065 | 6.23106844 | 0.605893758 | RRN3    |
| YDR303C   | 161.904987 | 155.692727 | 163.298395 | 152.551896 | 158.070014 | 153.911653 | -0.049914045 | 7.30097078 | 0.546279905 | RSC3    |
| YHR130C   | 1.44675456 | 0.69068862 | 0.96841153 | 0.53215778 | 1.10766292 | 1.3557654  | -0.049958266 | 0.17296539 | 0.938078557 | YHR130C |
| YOR030W   | 61.8158766 | 59.3992215 | 61.0704523 | 58.1234551 | 59.3577011 | 58.5561533 | -0.050156327 | 5.90308495 | 0.54918114  | DFG16   |
| YDR152W   | 53.5299187 | 52.4347779 | 52.8389543 | 56.0539526 | 48.3462286 | 48.8721147 | -0.050163156 | 5.70450191 | 0.589273874 | GIR2    |
| YDR455C   | 11.7713212 | 8.97895208 | 10.834104  | 11.2935706 | 8.99161663 | 10.1359604 | -0.050170759 | 3.38603407 | 0.771927339 | YDR455C |
| YKL058W   | 56.3576662 | 47.7150723 | 49.2679367 | 53.8070642 | 48.4765418 | 45.6441019 | -0.050248008 | 5.65341423 | 0.619718609 | TOA2    |
| YGR077C   | 112.386525 | 94.3941116 | 102.046365 | 92.2406815 | 99.2987228 | 106.653545 | -0.050308681 | 6.66211405 | 0.591760376 | PEX8    |
| YLR020C   | 94.8281852 | 105.963146 | 108.704195 | 101.760393 | 100.862482 | 96.3239038 | -0.05036953  | 6.6659715  | 0.560969151 | YEH2    |
| YPR119W   | 87.0025583 | 86.3936351 | 93.3911872 | 82.8392275 | 89.06913   | 85.7360216 | -0.0505774   | 6.45166172 | 0.54526538  | CLB2    |
| YER126C   | 55.7658121 | 61.2986152 | 59.6783607 | 56.7634963 | 58.4455081 | 55.5218212 | -0.0505776   | 5.85909439 | 0.564274279 | NSA2    |
| YDR131C   | 17.624101  | 23.0805114 | 16.5235218 | 19.6898378 | 17.3316668 | 18.2705528 | -0.050584059 | 4.24031866 | 0.750115963 | YDR131C |
| YHR001W-A | 6.37887237 | 4.54703343 | 4.47890334 | 5.08506321 | 4.88674817 | 4.84201929 | -0.050726018 | 2.36433403 | 0.815586809 | QCR10   |
| YJL041W   | 201.756499 | 193.105027 | 198.403313 | 186.136965 | 187.06472  | 199.555755 | -0.050728862 | 7.60330426 | 0.561411241 | NSP1    |
| YER128W   | 6.44463394 | 7.3673453  | 6.96045789 | 6.03112149 | 6.58082087 | 7.48898984 | -0.050921548 | 2.79438015 | 0.80004664  | VFA1    |
| YOR136W   | 286.457403 | 228.099917 | 248.458084 | 263.358972 | 237.495961 | 235.515818 | -0.050934678 | 7.96585093 | 0.621851216 | IDH2    |
| YGL255W   | 64.05177   | 55.7731062 | 72.6913907 | 57.7686832 | 60.3350507 | 67.7237099 | -0.050992509 | 5.98114628 | 0.637836099 | ZRT1    |
| YFL033C   | 154.539692 | 140.727807 | 155.066897 | 132.862059 | 151.228567 | 150.55452  | -0.051240364 | 7.2056066  | 0.569966649 | RIM15   |
| YGL247W   | 12.4289369 | 14.3893463 | 13.5577615 | 12.1213716 | 12.4449187 | 14.4614976 | -0.051245899 | 3.74013571 | 0.744119391 | BRR6    |
| YLR335W   | 223.720864 | 230.747557 | 228.00039  | 222.560209 | 218.079282 | 218.019989 | -0.051247836 | 7.80510729 | 0.550257732 | NUP2    |
| YAR003W   | 68.7208416 | 55.2550897 | 66.75987   | 61.3164018 | 60.9866172 | 61.6550457 | -0.051275091 | 5.96714746 | 0.596775139 | SWD1    |
| YJL081C   | 103.179905 | 109.18636  | 101.380582 | 111.930519 | 98.7774697 | 91.9983666 | -0.051355991 | 6.6848682  | 0.57718074  | ARP4    |
| YOL078W   | 55.7658121 | 60.7805987 | 57.7415376 | 52.7427487 | 57.072186  | 58.4915931 | -0.051357453 | 5.83859564 | 0.568832108 | AVO1    |
| YNL067W   | 245.882513 | 259.929151 | 258.747456 | 226.876599 | 244.532878 | 266.504742 | -0.051376019 | 7.96886571 | 0.584453792 | RPL9B   |
| YDR325W   | 61.6843535 | 66.1334355 | 60.8283494 | 60.9025013 | 62.9413164 | 58.2333521 | -0.051500012 | 5.95227663 | 0.552920233 | YCG1    |
| YOR176W   | 158.353863 | 140.152233 | 140.177569 | 147.998991 | 133.245333 | 141.903445 | -0.051517706 | 7.16750643 | 0.563174654 | HEM15   |
| YGL083W   | 71.2855428 | 73.2705513 | 67.5467044 | 66.0466931 | 66.850715  | 71.7910061 | -0.051634367 | 6.12078806 | 0.548544184 | SCY1    |
| YER044C   | 31.8943619 | 24.807233  | 34.9838666 | 30.392122  | 29.8417422 | 28.1482722 | -0.051644476 | 4.91293017 | 0.689622971 | ERG28   |
| YDL154W   | 16.8349621 | 17.785232  | 17.1893047 | 17.797712  | 16.8486305 | 15.6881425 | -0.051708615 | 4.09568171 | 0.698050826 | MSH5    |
| YOL107W   | 33.0780701 | 26.8217415 | 29.6576032 | 26.1348598 | 28.0825128 | 32.1510081 | -0.051734689 | 4.87890832 | 0.672922589 | YOL107W |
| YGR089W   | 178.279619 | 148.095152 | 177.21931  | 160.65252  | 167.322257 | 157.785269 | -0.051747167 | 7.36634797 | 0.587425693 | NNF2    |
| YPL050C   | 206.754379 | 213.653014 | 206.513759 | 202.45647  | 198.206506 | 204.139533 | -0.051856526 | 7.68240577 | 0.544939748 | MNN9    |
| YDR487C   | 138.822676 | 131.921527 | 120.022504 | 130.496913 | 129.661718 | 116.724945 | -0.051868154 | 7.00073177 | 0.565904964 | RIB3    |
| YJL122W   | 41.4297896 | 45.4127769 | 46.7863822 | 44.1099669 | 43.1336972 | 41.7059262 | -0.051892349 | 5.45610732 | 0.585091553 | ALB1    |
| YFL050C   | 38.4047574 | 35.9733657 | 36.7996382 | 36.4232435 | 35.51037   | 35.2499005 | -0.051979624 | 5.19045685 | 0.584241893 | ALR2    |
| YPR022C   | 119.949105 | 130.597707 | 123.04879  | 112.107905 | 122.820271 | 121.56597  | -0.052015108 | 6.93633195 | 0.548080208 | YPR022C |
| YGR195W   | 27.882906  | 31.2536601 | 27.1155229 | 27.7904617 | 27.3657898 | 28.0837119 | -0.052079118 | 4.82687202 | 0.638233906 | SKI6    |
| YJR061W   | 56.4891894 | 51.6865319 | 50.1152968 | 50.0819598 | 50.8873376 | 51.6482058 | -0.052114534 | 5.69861104 | 0.563961997 | YJR061W |
| YFR034C   | 70.496404  | 66.4212225 | 66.1546128 | 59.956443  | 65.938522  | 69.9833189 | -0.052268029 | 6.05753213 | 0.563900851 | PHO4    |
| YAL056W   | 145.333072 | 140.267348 | 148.348542 | 138.420151 | 141.45507  | 138.610872 | -0.052298403 | 7.15172554 | 0.520818693 | GPB2    |
| YMR268C   | 15.3882076 | 17.3247729 | 16.2208932 | 15.0778037 | 15.5724375 | 16.5919861 | -0.052452624 | 4.01420526 | 0.700121917 | PRP24   |
| YJL175W   | 7.8913885  | 8.57605039 | 9.38148672 | 7.21369433 | 8.53552014 | 9.23211679 | -0.052481411 | 3.10320269 | 0.768753235 | YJL175W |
| YDL085W   | 9.60118935 | 7.13711576 | 7.50518938 | 7.62759482 | 9.2522432  | 6.45602573 | -0.052529542 | 3.00689166 | 0.799835385 | NDE2    |
| YJR031C   | 139.611815 | 136.238331 | 136.06182  | 131.088199 | 137.610828 | 128.474912 | -0.052539089 | 7.07649047 | 0.521035051 | GEA1    |
| YNL170W   | 16.703439  | 13.5259855 | 15.4945845 | 16.6151484 | 13.4222683 | 13.9450156 | -0.052759702 | 3.91408313 | 0.718068731 | YNL170W |
| YLR386W   | 68.2605106 | 72.3496331 | 68.1519616 | 63.0311324 | 67.3068115 | 71.016283  | -0.05283888  | 6.09753391 | 0.548109972 | VAC14   |
| YJL068C   | 122.119237 | 94.3365542 | 104.285817 | 98.5083176 | 103.729374 | 106.847226 | -0.052871909 | 6.71521014 | 0.595381538 | YJL068C |
| YBR286W   | 1863.8802  | 1386.21206 | 1602.29741 | 1547.6922  | 1538.73926 | 1591.1521  | -0.052892142 | 10.6333835 | 0.634787863 | APE3    |
| YJL133W   | 67.2083254 | 66.8816815 | 68.0914359 | 62.6172319 | 64.4399192 | 67.8528304 | -0.053108535 | 6.0510198  | 0.528321711 | MRS3    |
| YML086C   | 250.157016 | 211.52339  | 248.09493  | 233.499007 | 231.045453 | 219.440314 | -0.053167711 | 7.86052062 | 0.578932877 | ALO1    |
| YGL087C   | 32.2889313 | 43.2831536 | 29.6576032 | 42.2178504 | 32.6434778 | 26.5342657 | -0.053326024 | 5.11293784 | 0.754144222 | MMS2    |
| YML076C   | 46.4934306 | 52.2621057 | 48.0574223 | 43.7551951 | 47.4340356 | 50.4215609 | -0.053351504 | 5.59088967 | 0.586208294 | WAR1    |
| YPL220W   | 1243.09097 | 1030.39231 | 1251.85348 | 1156.79275 | 1064.52922 | 1175.77141 | -0.05341638  | 10.1722434 | 0.607540532 | RPL1A   |
| YGL014W   | 312.235938 | 258.259987 | 308.681176 | 261.999013 | 286.233129 | 298.913991 | -0.053479879 | 8.16904129 | 0.600006409 | PUF4    |
| YHR155W   | 94.0390463 | 93.2429639 | 92.78593   | 87.6877761 | 94.346818  | 87.8665101 | -0.053483148 | 6.52015795 | 0.513489726 | YSP1    |
| YOR389W   | 19.5969481 | 19.0514945 | 17.3708819 | 17.9751072 | 16.8104137 | 19.1743964 | -0.053502755 | 4.20576371 | 0.68183308  | YOR389W |
| YDR067C   | 12.0343675 | 16.5765269 | 11.6814641 | 14.0726168 | 13.4222683 | 11.3626053 | -0.05358862  | 3.73762104 | 0.773536933 | OCA6    |
| YKL183W   | 32.8150239 | 34.073972  | 32.7444149 | 27.5539472 | 33.2298876 | 35.3144607 | -0.053589759 | 5.03284047 | 0.647629711 | LOT5    |
| YBR107C   | 20.1230407 | 18.9939371 | 20.8813737 | 18.5663936 | 20.1985591 | 19.0452759 | -0.053689485 | 4.30406489 | 0.66567511  | IML3    |
| YPL072W   | 21.2409874 | 21.814249  | 19.8524364 | 17.7385926 | 19.6121493 | 23.3062529 | -0.053878401 | 4.3722942  | 0.69459926  | UBP16   |
| YOR051C   | 102.522289 | 124.899526 | 104.770023 | 116.424296 | 108.746436 | 94.8390179 | -0.054046644 | 6.76620782 | 0.603870161 | ETT1    |
| YBR182C   | 13.3495989 | 10.014985  | 12.2867213 | 11.8257284 | 11.3372558 | 11.1043642 | -0.054096076 | 3.55659267 | 0.745896573 | SMP1    |
| YLR310C   | 290.797666 | 288.535172 | 297.362866 | 262.353785 | 293.98677  | 288.132428 | -0.054136072 | 8.16480122 | 0.548452932 | CDC25   |
| YCR044C   | 127.380163 | 100.725424 | 114.756767 | 107.9689   | 111.222388 | 110.914522 | -0.054150227 | 6.81077547 | 0.567897708 | PER1    |
| YDR300C   | 86.1476578 | 98.4231286 | 87.7017694 | 90.2894364 | 85.8764545 | 86.1233832 | -0.054208364 | 6.47950768 | 0.533053132 | PRO1    |

|           |            |            |            |            |             |            |              |            |             |           |
|-----------|------------|------------|------------|------------|-------------|------------|--------------|------------|-------------|-----------|
| YIL062C   | 51.6885947 | 71.2560428 | 50.2363483 | 53.8070642 | 57.012062   | 56.1028636 | -0.054221254 | 5.828567   | 0.663588352 | ARC15     |
| YDR432W   | 401.014059 | 441.637816 | 425.919497 | 404.91294  | 417.523764  | 399.369751 | -0.054276713 | 8.69764966 | 0.545103336 | NPL3      |
| YBL013W   | 14.0072146 | 11.6841492 | 15.430588  | 10.5248983 | 12.0539788  | 17.0439079 | -0.054384658 | 3.76147398 | 0.780084003 | FMT1      |
| YKL179C   | 70.2333577 | 73.0403217 | 69.9677332 | 65.573664  | 72.1935596  | 67.6591496 | -0.054413324 | 6.12725232 | 0.523567795 | COY1      |
| YPR061C   | 7.75986536 | 11.9719361 | 8.59465235 | 9.81535457 | 8.27489357  | 9.23211679 | -0.054420635 | 3.2365269  | 0.801306771 | JID1      |
| YBL083C   | 8.02291165 | 6.61909929 | 7.92886942 | 4.13900494 | 6.90660408  | 10.7170027 | -0.054459375 | 2.90366257 | 0.863041817 | YBL083C   |
| YPL137C   | 260.284297 | 242.546821 | 257.113262 | 229.419131 | 245.249601  | 257.014384 | -0.054694913 | 7.95836818 | 0.54683939  | GIP3      |
| YGL194C   | 44.2575372 | 46.8517115 | 41.6416959 | 40.2074766 | 42.4821308  | 45.1921801 | -0.054717041 | 5.44500458 | 0.575564847 | HOS2      |
| YHR015W   | 2.63046283 | 4.48947604 | 3.51049181 | 3.78423309 | 2.80173562  | 3.67993466 | -0.054771074 | 1.85820961 | 0.861344443 | MIP6      |
| YKL023C-A | 6.24734923 | 7.42490268 | 6.65782929 | 6.50415062 | 5.27768802  | 7.81179113 | -0.054798026 | 2.76264982 | 0.796834602 | YKL023C-A |
| YPR186C   | 21.0437027 | 28.2031187 | 24.5129169 | 21.463697  | 23.7821744  | 25.8886632 | -0.054897798 | 4.60203145 | 0.695169132 | PZF1      |
| YGR026W   | 249.10483  | 220.444785 | 244.100232 | 242.663947 | 229.937791  | 214.275494 | -0.054908142 | 7.86754911 | 0.55921103  | YGR026W   |
| YKL013C   | 79.4399776 | 91.7464719 | 74.8703166 | 90.5295909 | 78.8395371  | 67.4654688 | -0.054930528 | 6.33328443 | 0.62808988  | ARC19     |
| YDR113C   | 24.2660196 | 24.4618887 | 24.9971227 | 23.8879714 | 22.4790416  | 24.597458  | -0.054962572 | 4.5994639  | 0.624476476 | PSD1      |
| YJL173C   | 22.2931725 | 29.6996107 | 21.4261052 | 21.0497966 | 23.3260779  | 26.4051452 | -0.054963184 | 4.59500193 | 0.718106009 | RFA3      |
| YJR075W   | 182.619882 | 166.916417 | 161.724726 | 172.123477 | 160.48081   | 159.399275 | -0.055030347 | 7.38657979 | 0.537494165 | HOC1      |
| YDR491C   | 30.3160842 | 23.0805114 | 28.7497174 | 25.3070588 | 25.0201506  | 28.6647542 | -0.055196931 | 4.75284528 | 0.666803883 | YDR491C   |
| YGL016W   | 156.775585 | 146.023086 | 152.343239 | 141.849612 | 145.885722  | 150.296279 | -0.055197508 | 7.21896671 | 0.506227792 | KAP122    |
| YLR163C   | 57.0810435 | 67.9177145 | 57.2573319 | 56.822625  | 60.465364   | 58.2333521 | -0.055351684 | 5.90122161 | 0.567401426 | MAS1      |
| YDL220C   | 39.7857504 | 40.6355139 | 42.065376  | 35.5954425 | 42.06532147 | 41.5122454 | -0.055429494 | 5.32887169 | 0.585531449 | CDC13     |
| YDR267C   | 39.0623731 | 37.8727594 | 38.6759356 | 43.9917097 | 35.2497435  | 31.8927671 | -0.055487548 | 5.24535231 | 0.641758093 | CIA1      |
| YML100W   | 352.021689 | 309.083158 | 325.870481 | 336.087201 | 319.723644  | 293.749171 | -0.055554659 | 8.33484039 | 0.559743568 | TSL1      |
| YGL023C   | 92.7238149 | 85.4151596 | 93.5122386 | 86.9191038 | 88.7433468  | 85.6714614 | -0.05555975  | 6.47492835 | 0.50086971  | PIB2      |
| YHR011W   | 16.6376774 | 15.540494  | 16.2208932 | 17.5612067 | 14.7254012  | 14.2032566 | -0.0557317   | 3.99517582 | 0.691440575 | DIA4      |
| YJL111W   | 244.041189 | 279.095761 | 241.073946 | 248.813326 | 248.57259   | 237.904548 | -0.055783246 | 7.96609998 | 0.551737111 | CC7       |
| YHR019C   | 1049.81772 | 921.666408 | 1045.09762 | 1014.58837 | 962.950016  | 924.438324 | -0.055824189 | 9.94624454 | 0.562491451 | DED81     |
| YJL208C   | 49.9787939 | 51.3987449 | 52.8389543 | 50.377603  | 46.6521559  | 51.3254045 | -0.055899755 | 5.65990659 | 0.53447072  | NUC1      |
| YER111C   | 79.1111698 | 77.414683  | 76.8676654 | 76.2759482 | 73.3012225  | 74.8898984 | -0.055954338 | 6.25618133 | 0.486862465 | SW4       |
| YLR016C   | 20.9779411 | 20.6631013 | 21.7892595 | 20.2219956 | 20.2637157  | 20.5301618 | -0.055969396 | 4.38305035 | 0.63176939  | PML1      |
| YGL063W   | 32.0916466 | 28.7786926 | 30.7470662 | 32.1068526 | 28.5386093  | 27.3735491 | -0.055977887 | 4.9100687  | 0.60877392  | PUS2      |
| YGR069C   | 63.1968696 | 66.3636651 | 70.028259  | 62.0259455 | 64.114136   | 65.9160227 | -0.05608743  | 6.03125361 | 0.517187612 | RRP4      |
| YPL147W   | 14.2044993 | 16.28874   | 14.4051215 | 13.4813304 | 14.8557144  | 14.9134194 | -0.056101874 | 3.88938942 | 0.699935167 | PXA1      |
| YGL106W   | 59.7772679 | 62.2195333 | 57.3178576 | 61.0207586 | 58.1848815  | 53.197652  | -0.05639714  | 5.87660757 | 0.533078533 | MLC1      |
| YPL173W   | 29.5269453 | 32.8077095 | 30.2023347 | 30.7468938 | 30.4933086  | 27.7609106 | -0.056634881 | 4.92561622 | 0.598761195 | MRPL40    |
| YBR032W   | 4.27450211 | 4.48947604 | 4.41837762 | 5.55809235 | 3.71392861  | 3.35713338 | -0.056732198 | 2.15098438 | 0.805514234 | YBR032W   |
| YDL032W   | 1.18370828 | 1.09359032 | 1.39209158 | 0.94605827 | 0.91219299  | 1.67856669 | -0.056780234 | 0.40284147 | 0.940165875 | YDL032W   |
| YGL175C   | 11.5082749 | 12.1446083 | 11.7419898 | 12.4761435 | 9.96896627  | 11.5562861 | -0.056854589 | 3.54862815 | 0.70693266  | SAE2      |
| YGR010W   | 29.0668143 | 32.4048078 | 29.1128717 | 27.4356899 | 30.2978387  | 29.4394773 | -0.056856016 | 4.89498313 | 0.603212594 | NMA2      |
| YDR313C   | 21.4382721 | 23.1956262 | 20.3366422 | 19.3941946 | 20.7198122  | 22.4024093 | -0.056916366 | 4.41763599 | 0.650294134 | PIB1      |
| YML099W-A | 7.82562693 | 8.1155913  | 7.5657151  | 7.80498075 | 7.03691736  | 7.74723087 | -0.056967265 | 2.96555778 | 0.731732591 | YML099W-A |
| YOR168W   | 469.340331 | 508.46194  | 492.376739 | 457.18266  | 470.300644  | 485.751376 | -0.05707506  | 8.90898877 | 0.523427538 | GLN4      |
| YML107C   | 21.8986031 | 22.562495  | 23.6050311 | 19.5715805 | 23.7821744  | 22.1441682 | -0.057096    | 4.48409229 | 0.648528744 | PML39     |
| YJL076W   | 371.881683 | 318.810356 | 371.022668 | 330.292594 | 344.808951  | 345.332816 | -0.057129981 | 8.43935532 | 0.547349691 | NET1      |
| YPL254W   | 44.0602525 | 54.9673028 | 49.2679367 | 44.8195106 | 48.9326383  | 48.936675  | -0.057212725 | 5.60388873 | 0.583737078 | HFI1      |
| YGR252W   | 51.4255484 | 61.1835004 | 52.6573771 | 58.7147415 | 48.2810719  | 51.8418866 | -0.057243573 | 5.75935375 | 0.587311774 | GCN5      |
| YIL043C   | 506.890188 | 417.060813 | 480.211069 | 463.509425 | 432.965888  | 452.890205 | -0.057287216 | 8.84246001 | 0.561058002 | CBR1      |
| YIL165C   | 3.68264797 | 4.83482035 | 4.11574901 | 4.31639087 | 3.90939854  | 3.93817569 | -0.057303765 | 2.09364009 | 0.802663108 | YIL165C   |
| YNL032W   | 19.8599944 | 24.3467739 | 20.6997965 | 21.0497966 | 22.1532584  | 19.2389567 | -0.057321971 | 4.4170525  | 0.663942716 | SIW14     |
| YJR131W   | 72.1404432 | 64.8671731 | 74.9308423 | 65.8101786 | 69.1311974  | 68.6921137 | -0.057453324 | 6.11639865 | 0.517389266 | MNS1      |
| YHR211W   | 75.2312371 | 58.1905164 | 68.4545902 | 55.7583094 | 68.5279399  | 68.6275535 | -0.057456848 | 6.04584497 | 0.615691889 | FL05      |
| YOR089C   | 36.3003871 | 40.6355139 | 41.4601187 | 41.626564  | 37.7256959  | 34.4106171 | -0.057506732 | 5.27936036 | 0.592089515 | VPS21     |
| YPR126C   | 14.4675456 | 18.9939371 | 17.128779  | 15.3734469 | 16.1588473  | 17.1730284 | -0.057533643 | 4.06063712 | 0.703574558 | YPR126C   |
| YJL161W   | 4.93211781 | 4.60459081 | 4.23680046 | 3.84336173 | 4.6261216   | 4.77745904 | -0.05762569  | 2.20779969 | 0.785164428 | FMP33     |
| YBR224W   | 0.26304628 | 0.17267216 | 0.48420577 | 0.23651457 | 0.19546993  | 0.4519218  | -0.057639679 | -1.2399166 | 1           | YBR224W   |
| YGR040W   | 39.7857504 | 41.5564321 | 36.5575354 | 35.8319571 | 38.4424189  | 39.0589556 | -0.05770309  | 5.27282325 | 0.56445243  | KSS1      |
| YHR012W   | 42.6134979 | 54.6219585 | 44.6074562 | 51.0871467 | 41.2441546  | 43.9655352 | -0.057761984 | 5.53956988 | 0.625334694 | VPS29     |
| YJR152W   | 19.5311865 | 16.4614122 | 18.5813963 | 16.9107916 | 17.5922934  | 17.8831913 | -0.057902095 | 4.16507476 | 0.656839703 | DAL5      |
| YGR167W   | 83.1883871 | 94.5092264 | 88.670181  | 96.4979438 | 87.4402139  | 71.9201266 | -0.057933817 | 6.4460423  | 0.588653453 | CLC1      |
| YDR219C   | 26.4361515 | 33.6710703 | 30.141809  | 27.6722045 | 29.3856457  | 29.7622786 | -0.057952132 | 4.88995081 | 0.627607915 | MBF1      |
| YDL158C   | 1.77556241 | 2.41741018 | 2.23945167 | 2.48340296 | 1.56375941  | 2.13048849 | -0.05800693  | 1.16170521 | 0.874048171 | YDL158C   |
| YGR058W   | 22.6877419 | 25.555479  | 23.1813511 | 22.1732408 | 22.835717   | 24.2100965 | -0.058113099 | 4.55330853 | 0.626324574 | PEF1      |
| YGR265W   | 27.4883366 | 31.3687749 | 25.4208027 | 25.0705442 | 25.5414038  | 30.4078812 | -0.058160296 | 4.79062437 | 0.648671241 | YGR265W   |
| YDR415C   | 43.5999215 | 46.1034655 | 45.091662  | 40.3848625 | 44.3716734  | 44.8048185 | -0.058193169 | 5.46541465 | 0.537944902 | YDR415C   |
| YLR085C   | 36.3661487 | 42.592465  | 40.1890786 | 35.8910857 | 38.3772623  | 40.2856005 | -0.058342492 | 5.2884319  | 0.576291464 | ARP6      |
| YMR005W   | 61.3555456 | 67.9752719 | 62.0388638 | 61.3755304 | 63.9186661  | 58.5561533 | -0.05838789  | 5.96969594 | 0.510891347 | TAF4      |
| YKR068C   | 27.2252903 | 37.7576447 | 26.2681628 | 26.9035321 | 31.0797184  | 29.7622786 | -0.05847644  | 4.90555624 | 0.686510934 | BET3      |
| YEL004W   | 23.1480729 | 20.4328717 | 19.9734879 | 19.8672237 | 20.4591857  | 20.6592823 | -0.058487078 | 4.38343486 | 0.629907668 | YEA4      |
| YPL059W   | 47.7429004 | 45.9883507 | 43.8811476 | 46.1794694 | 46.261216   | 39.639998  | -0.058490569 | 5.49425503 | 0.550567497 | GRX5      |
| YLR259C   | 1079.60771 | 970.532628 | 1042.67659 | 1135.74296 | 963.210643  | 870.530509 | -0.058640635 | 9.98087795 | 0.594049322 | HSP60     |
| YDR510W   | 71.9431585 | 76.3786501 | 59.0731035 | 85.6774023 | 63.0716297  | 50.2924404 | -0.058676111 | 6.08527663 | 0.706961821 | SMT3      |
| YGL095C   | 53.0038261 | 56.9818113 | 52.1731713 | 54.8713798 | 51.6692173  | 49.1303558 | -0.05880495  | 5.73085733 | 0.519430532 | VPS45     |
| YDL053C   | 43.1395905 | 42.5349076 | 41.0969644 | 38.0197168 | 40.9183713  | 42.8034506 | -0.058883234 | 5.37632102 | 0.539274279 | PBP4      |
| YMR098C   | 43.4026368 | 47.4272854 | 41.7022216 | 45.3516684 | 41.5699378  | 40.2856005 | -0.059005243 | 5.44055761 | 0.547203058 | ATP25     |

|           |            |            |            |            |            |            |              |            |             |           |
|-----------|------------|------------|------------|------------|------------|------------|--------------|------------|-------------|-----------|
| YDR007W   | 50.4391249 | 50.4778268 | 51.6284398 | 49.1359015 | 46.9127824 | 50.3570007 | -0.059184359 | 5.64248178 | 0.50121417  | TRP1      |
| YBR257W   | 9.99575877 | 11.799264  | 11.6209384 | 9.63796865 | 11.1417858 | 11.3626053 | -0.059268567 | 3.46643601 | 0.724953474 | POP4      |
| YER087C-A | 5.06364096 | 6.27375498 | 6.1130978  | 5.43983506 | 4.75643489 | 6.58514624 | -0.05927988  | 2.54540143 | 0.788724064 | YER087C-A |
| YPR004C   | 245.093375 | 217.221572 | 236.77662  | 216.765602 | 218.535378 | 235.515818 | -0.059453383 | 7.83561536 | 0.516854671 | AIM45     |
| YML059C   | 347.089571 | 288.017155 | 352.199169 | 296.604829 | 324.740705 | 322.994967 | -0.059542625 | 8.33336662 | 0.554772163 | NTE1      |
| YOR243C   | 125.341554 | 143.433004 | 131.219763 | 132.211644 | 132.137671 | 119.501036 | -0.05966886  | 7.03100699 | 0.503141594 | PUS7      |
| YLR225C   | 40.2460814 | 45.585449  | 46.3021764 | 40.7396343 | 44.1110468 | 42.0287275 | -0.059822883 | 5.43631899 | 0.542984968 | YLR225C   |
| YPR055W   | 75.0339524 | 84.8971431 | 72.3282363 | 71.1317563 | 79.4259469 | 72.3720484 | -0.059892247 | 6.24782045 | 0.519990989 | SEC8      |
| YOL023W   | 34.5248247 | 34.0164146 | 32.5628378 | 31.870338  | 31.9267547 | 33.1839722 | -0.059998678 | 5.05037075 | 0.546939847 | IFM1      |
| YDR326C   | 262.322906 | 232.359164 | 262.621103 | 222.50108  | 253.719965 | 250.235557 | -0.060006007 | 7.95070541 | 0.533211653 | YSP2      |
| YCR091W   | 18.2159551 | 20.317757  | 19.1866535 | 19.5124519 | 17.5922934 | 18.2705528 | -0.060029138 | 4.24689474 | 0.63765122  | KIN82     |
| YEL029C   | 38.5362805 | 34.7071032 | 38.373307  | 36.3641148 | 35.4452134 | 35.1853402 | -0.060033452 | 5.19203439 | 0.537593828 | BUD16     |
| YDR186C   | 156.709823 | 155.17471  | 159.061594 | 142.38177  | 150.055747 | 159.334715 | -0.06013181  | 7.2659061  | 0.477508383 | YDR186C   |
| YDR354W   | 106.599506 | 86.7389794 | 100.412171 | 99.3952472 | 91.4799257 | 90.7071615 | -0.060149013 | 6.58504009 | 0.523803822 | TRP4      |
| YML051W   | 138.362345 | 100.898096 | 123.290893 | 109.033216 | 116.82586  | 121.760645 | -0.060245018 | 6.88821026 | 0.579732823 | GAL80     |
| YDR146C   | 74.2448135 | 82.0768312 | 74.567688  | 73.2603875 | 73.3012225 | 74.9544587 | -0.060308753 | 6.23904522 | 0.476301284 | SWI5      |
| YGR099W   | 48.9266087 | 57.6724999 | 48.4205766 | 51.6784331 | 50.4963978 | 46.5479455 | -0.060337275 | 5.66576555 | 0.549549516 | TEL2      |
| YBR105C   | 73.7844825 | 77.3571256 | 85.2807406 | 69.4761544 | 70.4343303 | 86.8981063 | -0.060440993 | 6.27293684 | 0.561188892 | VID24     |
| YIL083C   | 58.0017055 | 59.1689919 | 59.617835  | 53.2749065 | 54.1451697 | 62.1715277 | -0.060487136 | 5.85430481 | 0.513650511 | CAB2      |
| YPL008W   | 61.8816382 | 65.2700748 | 62.8256982 | 64.8641203 | 60.3350507 | 56.9421469 | -0.060513985 | 5.95783471 | 0.490528424 | CHL1      |
| YDR126W   | 21.76708   | 19.281724  | 21.244528  | 18.7437795 | 18.8954263 | 22.079608  | -0.060521319 | 4.35398218 | 0.635808195 | SWF1      |
| YHR156C   | 8.02291165 | 8.86383731 | 8.83675524 | 7.21369433 | 8.66583342 | 8.84475525 | -0.060563121 | 3.09258744 | 0.726787006 | LIN1      |
| YDR530C   | 27.1595288 | 27.3973153 | 22.9997739 | 27.7904617 | 23.3912346 | 23.1125721 | -0.060633857 | 4.66923859 | 0.628897436 | APA2      |
| YHR076W   | 48.0717083 | 55.6579914 | 49.207411  | 52.861006  | 46.9779391 | 46.8061865 | -0.06072245  | 5.64602249 | 0.539470737 | PTC7      |
| YDR051C   | 30.7106536 | 32.1745783 | 28.4470888 | 30.2738647 | 29.9720554 | 27.3089888 | -0.060791362 | 4.90426303 | 0.573707322 | DET1      |
| YOL065C   | 22.8192651 | 28.1455613 | 21.7287338 | 24.9522869 | 23.5215479 | 21.2403246 | -0.060969386 | 4.57767528 | 0.650184007 | INP54     |
| YDL197C   | 31.2367462 | 27.8577744 | 32.8049407 | 28.1452336 | 31.0797184 | 28.858435  | -0.060972064 | 4.91227422 | 0.581383655 | ASF2      |
| YPL118W   | 76.4149453 | 87.429668  | 79.8939514 | 78.5819652 | 78.7092239 | 76.4393446 | -0.061045554 | 6.3167865  | 0.478018257 | MRP51     |
| YNL291C   | 113.241425 | 86.1634056 | 105.920011 | 98.3309317 | 96.9530837 | 97.2277474 | -0.061137184 | 6.64017903 | 0.544408153 | MID1      |
| YKL169C   | 4.53754839 | 7.30978791 | 4.53942906 | 5.43983506 | 4.75643489 | 5.55218212 | -0.061183246 | 2.45927267 | 0.805463401 | YKL169C   |
| YDR261C   | 208.529941 | 183.608059 | 202.276959 | 190.571613 | 193.775854 | 185.287938 | -0.061221538 | 7.6008373  | 0.497635821 | EXG2      |
| YIR023W   | 100.089111 | 109.474147 | 104.709497 | 94.0145408 | 100.392796 | 106.266183 | -0.06157725  | 6.68253999 | 0.475962528 | DAL81     |
| YDL133W   | 42.8107826 | 54.103942  | 40.975913  | 41.3309208 | 44.6974566 | 46.2251442 | -0.061610291 | 5.49697354 | 0.596822535 | SRF1      |
| YDR102C   | 0.65761571 | 0.51801647 | 0.54473149 | 0.23651457 | 0.65156642 | 0.77472309 | -0.061662841 | -0.5522425 | 1           | YDR102C   |
| YOR038C   | 65.7615709 | 80.2925523 | 75.5966253 | 69.3578971 | 70.5646436 | 72.5657292 | -0.061903875 | 6.17983999 | 0.50903637  | HIR2      |
| YOL095C   | 27.8171445 | 29.4693812 | 25.4813285 | 23.6514568 | 28.408296  | 27.3089888 | -0.061907259 | 4.76241348 | 0.608462805 | HMI1      |
| YML053C   | 13.6126452 | 18.3608059 | 14.1024929 | 12.5944007 | 15.1814976 | 16.4628656 | -0.061908946 | 3.92443498 | 0.727591288 | YML053C   |
| YGL079W   | 19.005094  | 25.0374625 | 21.0629508 | 20.9315393 | 21.7623185 | 19.7554387 | -0.06205076  | 4.41968262 | 0.649306747 | KXD1      |
| YER018C   | 30.7106536 | 27.2246432 | 29.8997061 | 30.392122  | 25.7368737 | 27.8900311 | -0.062234213 | 4.84641552 | 0.578214615 | SPC25     |
| YNL265C   | 21.6355568 | 30.4478567 | 24.5734426 | 26.8444035 | 22.4138849 | 24.2100965 | -0.062325137 | 4.65408944 | 0.662796953 | IST1      |
| YNL180C   | 49.189655  | 52.3772205 | 54.5336744 | 50.4958603 | 47.6946621 | 51.3254045 | -0.062489804 | 5.6743861  | 0.492315931 | RH05      |
| YPL124W   | 7.49681908 | 8.46093562 | 9.13938384 | 7.0363084  | 8.014267   | 9.03843602 | -0.062575269 | 3.0569092  | 0.733030708 | SPC29     |
| YDR484W   | 25.1209201 | 32.8652669 | 27.8418316 | 25.2479301 | 27.8870429 | 29.1812363 | -0.062597524 | 4.81561214 | 0.626694926 | VPS52     |
| YDR277C   | 29.263899  | 30.9658732 | 28.9918203 | 24.8931583 | 26.9096933 | 33.7004543 | -0.062688288 | 4.86984031 | 0.624090076 | MTH1      |
| YMR188C   | 16.5061543 | 19.7997405 | 17.1893047 | 18.2116217 | 18.6999563 | 14.3323771 | -0.062713108 | 4.13725886 | 0.672888735 | MRPS17    |
| YDL210W   | 8.87781207 | 7.59757484 | 8.04992087 | 7.45020889 | 6.90660408 | 9.10299627 | -0.062742268 | 3.0203207  | 0.72954318  | UGA4      |
| YJL005W   | 242.068342 | 220.32967  | 245.129169 | 210.793609 | 238.408154 | 228.220509 | -0.062753431 | 7.8513501  | 0.501020664 | CYR1      |
| YDR065W   | 13.6784067 | 18.2456911 | 14.949853  | 14.7230319 | 15.9633774 | 14.2678169 | -0.062781015 | 3.9490374  | 0.69540684  | RRG1      |
| YJR011C   | 8.08867322 | 8.9213947  | 7.08150933 | 8.45539581 | 7.75364043 | 6.84338727 | -0.06282064  | 2.99842241 | 0.724083488 | YJR011C   |
| YOR076C   | 39.9830351 | 41.095973  | 35.0443923 | 34.2354837 | 38.9636721 | 38.0259915 | -0.062920088 | 5.24830144 | 0.555347014 | SKI7      |
| YDR034C   | 64.512101  | 68.4932883 | 57.6204862 | 60.2520862 | 62.6806899 | 59.5891175 | -0.062957454 | 5.96159743 | 0.493236214 | LYS14     |
| YGR203W   | 15.2566844 | 8.57605039 | 14.1024929 | 12.890044  | 10.8811593 | 12.4601297 | -0.063060104 | 3.63978223 | 0.757203564 | YCH1      |
| YNR062C   | 9.60118935 | 9.72719809 | 9.86569249 | 9.51971136 | 9.12192992 | 9.29667705 | -0.063158854 | 3.27045945 | 0.67183657  | YNR062C   |
| YDL106C   | 32.6177391 | 36.8367265 | 31.5339005 | 33.8215832 | 32.7737911 | 30.0850799 | -0.063182315 | 5.04800191 | 0.563556123 | PHO2      |
| YMR279C   | 42.7450211 | 40.1750548 | 46.0600735 | 39.4388042 | 43.4594804 | 40.5438416 | -0.06346656  | 5.39878458 | 0.521664383 | YMR279C   |
| YLR240W   | 58.0674671 | 60.4352544 | 59.3152064 | 59.4242852 | 55.7740858 | 54.9407789 | -0.063497285 | 5.86113195 | 0.459143227 | VPS34     |
| YLR300W   | 1552.82797 | 1176.07005 | 1415.2124  | 1367.882   | 1298.96282 | 1298.56501 | -0.063539967 | 10.4005521 | 0.562742915 | EXG1      |
| YDR470C   | 46.888     | 47.0243837 | 46.8469079 | 47.6576855 | 43.8504202 | 43.1262519 | -0.063552268 | 5.52453988 | 0.483499194 | UGO1      |
| YJL191W   | 179.529088 | 151.893939 | 169.59307  | 154.089241 | 155.333435 | 169.922597 | -0.063569922 | 7.35316927 | 0.496663984 | RPS14B    |
| YGL111W   | 88.9754054 | 92.8976196 | 85.5228435 | 86.9191038 | 84.2475384 | 84.7030575 | -0.063585563 | 6.44859917 | 0.436853048 | NSA1      |
| YNR070W   | 29.3954222 | 29.1240369 | 29.9602318 | 26.0757311 | 30.4933086 | 28.1482722 | -0.063588381 | 4.85718585 | 0.561400461 | PRD18     |
| YER114C   | 164.535425 | 158.225252 | 168.806235 | 143.978243 | 164.911462 | 161.529764 | -0.06362822  | 7.32593719 | 0.476857489 | BOI2      |
| YGR247W   | 14.3360224 | 16.5765269 | 15.0709045 | 13.7178449 | 14.4647746 | 15.8818233 | -0.063640297 | 3.9199948  | 0.655296636 | CPD1      |
| YDR439W   | 10.6533745 | 12.8928543 | 12.0446184 | 9.81535457 | 12.2494487 | 12.0727681 | -0.063703541 | 3.55422845 | 0.710601725 | LR54      |
| YFL034W   | 105.876129 | 97.73244   | 109.854183 | 100.045662 | 99.624506  | 100.197519 | -0.063711222 | 6.67726389 | 0.443372079 | YFL034W   |
| YKL007W   | 67.4713717 | 91.0557833 | 72.8729678 | 70.9543704 | 75.3862351 | 75.2126997 | -0.06380269  | 6.24102589 | 0.55813384  | CAP1      |
| YDR531W   | 63.7887237 | 84.6093562 | 70.8756191 | 64.8641203 | 70.8252701 | 74.2442959 | -0.064035593 | 6.16339941 | 0.556009341 | CAB1      |
| YER026C   | 168.612668 | 134.338937 | 168.32203  | 144.451272 | 148.557144 | 157.720708 | -0.064046854 | 7.26465383 | 0.524443699 | CH01      |
| YCR087W   | 19.1366171 | 23.5409705 | 24.3918655 | 21.0497966 | 20.3288724 | 22.8543311 | -0.064074165 | 4.46092199 | 0.630934445 | YCR087W   |
| YLR201C   | 71.2197812 | 58.4783033 | 63.5520068 | 57.2956541 | 61.6381836 | 65.8514624 | -0.064144073 | 5.97977537 | 0.514272014 | COQ9      |
| YGL143C   | 28.1459523 | 26.6490693 | 28.1444602 | 26.3713743 | 28.4734527 | 24.4683375 | -0.064194921 | 4.7635983  | 0.565532668 | MRF1      |
| YPR047W   | 22.7535035 | 22.5049376 | 23.0602996 | 22.8236558 | 21.3713787 | 21.1112041 | -0.064299374 | 4.48543742 | 0.572694952 | MSF1      |
| YHL006W-A | 13.1523142 | 8.9213947  | 11.5604127 | 7.15456568 | 10.9463159 | 14.0741361 | -0.064358826 | 3.46630263 | 0.78902444  | YHL006W-A |



|           |            |            |            |            |            |            |              |            |             |           |
|-----------|------------|------------|------------|------------|------------|------------|--------------|------------|-------------|-----------|
| YOL088C   | 45.3754839 | 49.7871381 | 48.8442567 | 51.9740763 | 43.9155769 | 41.7704864 | -0.064517802 | 5.5573773  | 0.534232587 | MPD2      |
| YMR252C   | 13.020791  | 13.1806412 | 11.8025156 | 11.7074711 | 11.7281956 | 12.9120515 | -0.064640948 | 3.64558281 | 0.659723091 | YMR252C   |
| YOL143C   | 68.9838878 | 73.0978791 | 67.1230244 | 71.3682709 | 64.3096059 | 64.3020162 | -0.06477842  | 6.09454923 | 0.46197762  | RIB4      |
| YLR211C   | 5.32668724 | 7.07955837 | 5.26573771 | 6.14937877 | 4.56096496 | 6.1977847  | -0.064965967 | 2.56160681 | 0.781584239 | ATG38     |
| YPR104C   | 111.531624 | 97.1568661 | 103.620034 | 94.9605991 | 104.120314 | 99.4227962 | -0.064975176 | 6.67117163 | 0.45525794  | FHL1      |
| YDR411C   | 89.3042132 | 67.2270258 | 83.8281233 | 68.7666107 | 77.2106211 | 83.7346537 | -0.065029679 | 6.29351052 | 0.562260726 | DFM1      |
| YBR175W   | 41.8243591 | 39.7721531 | 43.2758904 | 41.3900494 | 39.8758651 | 38.0259915 | -0.065239297 | 5.35123628 | 0.491128025 | SWD3      |
| YNL149C   | 22.2931725 | 23.9438722 | 25.4813285 | 23.3558136 | 23.1957646 | 22.0150477 | -0.065328416 | 4.55544354 | 0.576460857 | PGA2      |
| YOR359W   | 134.942743 | 137.504593 | 162.148406 | 103.829895 | 146.993385 | 164.628656 | -0.065386203 | 7.14748646 | 0.640496383 | VTS1      |
| YLR131C   | 65.9588556 | 66.651452  | 67.3046015 | 57.8869405 | 62.2245934 | 71.016283  | -0.065477843 | 6.02883313 | 0.490042733 | ACE2      |
| YKL222C   | 31.4340309 | 35.0524476 | 34.0759808 | 33.2302968 | 28.9947058 | 33.8941351 | -0.065515881 | 5.0408219  | 0.548052441 | YKL222C   |
| YAR035W   | 21.2409874 | 15.7131661 | 22.6366196 | 18.7437795 | 19.5469927 | 18.5933541 | -0.065634047 | 4.28700545 | 0.66118125  | YAT1      |
| YDR163W   | 8.08867322 | 9.89987024 | 9.19990956 | 7.56846618 | 9.05677327 | 9.42579756 | -0.065771686 | 3.16992824 | 0.718484632 | CWC15     |
| YLR073C   | 42.0874054 | 36.4913822 | 43.3969418 | 27.3174326 | 41.5699378 | 47.7100301 | -0.065831105 | 5.31653369 | 0.688381476 | RFU1      |
| YDR270W   | 63.0653465 | 70.5653542 | 74.3255851 | 67.5840378 | 63.8535094 | 67.2717881 | -0.066069357 | 6.08568413 | 0.469127539 | CCC2      |
| YER003C   | 461.580466 | 406.182467 | 426.58528  | 422.947176 | 413.158269 | 400.144475 | -0.066127553 | 8.72070243 | 0.470938444 | PMH0      |
| YHL033C   | 792.624214 | 929.436655 | 803.055264 | 896.804113 | 767.023993 | 748.124261 | -0.066142785 | 9.68474403 | 0.534605262 | RPL8A     |
| YAL030W   | 24.4633044 | 26.1886102 | 16.5840475 | 27.1400467 | 16.6801004 | 20.336481  | -0.066281225 | 4.46265092 | 0.731991848 | SNC1      |
| YML110C   | 168.612668 | 183.090042 | 171.529893 | 188.856883 | 157.157821 | 153.653412 | -0.066294544 | 7.41473839 | 0.504061019 | COQ5      |
| YMR131C   | 218.788746 | 258.375102 | 240.771317 | 229.123488 | 220.750704 | 235.900318 | -0.066317033 | 7.87093958 | 0.481692793 | RRB1      |
| YJL030W   | 11.7713212 | 15.1375923 | 12.4682985 | 11.2935706 | 11.1417858 | 15.2362207 | -0.066429519 | 3.69755727 | 0.715453449 | MAD2      |
| YPL064C   | 24.7263506 | 24.3467739 | 26.8128943 | 24.5975151 | 23.3260779 | 24.5328978 | -0.066430031 | 4.63525704 | 0.552888185 | CWC27     |
| YGL187C   | 69.115411  | 60.6654839 | 71.2387734 | 62.9128751 | 64.5702325 | 64.4311367 | -0.066434309 | 6.0357267  | 0.461115712 | COX4      |
| YDR428C   | 26.8964825 | 32.2321357 | 30.7470662 | 27.4356899 | 29.4508023 | 29.0521158 | -0.066482375 | 4.87956206 | 0.557579952 | BN47      |
| YPL199C   | 54.5163422 | 57.0393687 | 52.233697  | 55.8765667 | 51.9950005 | 48.4847532 | -0.066608604 | 5.74128851 | 0.472092956 | YPL199C   |
| YJL145W   | 50.7679327 | 63.658468  | 52.5363256 | 57.5321687 | 52.9071935 | 49.0012353 | -0.066934659 | 5.76954563 | 0.536952348 | SFH5      |
| YMR231W   | 83.3856719 | 88.0052419 | 79.5913228 | 78.4637079 | 83.3353455 | 77.8596703 | -0.066941247 | 6.3558039  | 0.427358232 | PEP5      |
| YOR161C   | 110.742485 | 93.2429639 | 102.712148 | 97.9170312 | 94.6726012 | 100.068399 | -0.066978159 | 6.64393605 | 0.448497138 | PNS1      |
| YNL239W   | 182.685644 | 156.210743 | 178.853505 | 160.711649 | 169.472427 | 163.918493 | -0.067242043 | 7.39877116 | 0.463818674 | LAP3      |
| YML106W   | 397.725981 | 332.854358 | 371.809503 | 347.91293  | 346.242397 | 357.857506 | -0.067344529 | 8.48855356 | 0.477833773 | URA5      |
| YLR185W   | 227.863843 | 249.683937 | 196.405964 | 236.100668 | 213.518317 | 193.551651 | -0.067366248 | 7.77915018 | 0.539844214 | RPL37A    |
| YGR130C   | 158.419624 | 144.296365 | 164.751012 | 167.511443 | 142.953673 | 135.51198  | -0.067429246 | 7.25147805 | 0.494821116 | YGR130C   |
| YDR501W   | 19.9915175 | 20.2026422 | 21.8497852 | 20.1037383 | 18.0483899 | 21.0466439 | -0.067574656 | 4.34600957 | 0.586107384 | PLM2      |
| YGL139W   | 190.642794 | 159.894416 | 186.116591 | 154.503142 | 170.514933 | 187.031065 | -0.067663113 | 7.45027313 | 0.509506729 | FLC3      |
| YMR127C   | 20.2545638 | 26.3612824 | 19.1261278 | 21.3454398 | 20.9152822 | 20.5301618 | -0.067668919 | 4.43064356 | 0.634446189 | SAS2      |
| YGL077C   | 353.073874 | 270.51971  | 329.804653 | 288.311258 | 302.391977 | 318.863111 | -0.067762573 | 8.27888359 | 0.528398302 | HNM1      |
| YDR346C   | 221.156163 | 252.676921 | 237.260826 | 249.108969 | 220.685547 | 208.658751 | -0.067775119 | 7.8563642  | 0.492749865 | SVF1      |
| YPL021W   | 0.32880785 | 0.23022954 | 0.3026286  | 0.35477185 | 0.32578321 | 0.12912051 | -0.067859683 | -1.3123394 | 1           | ECM23     |
| YBL048W   | 2.56470126 | 1.72672155 | 1.99734879 | 2.06950247 | 2.21532584 | 1.67856669 | -0.06795344  | 1.11080741 | 0.826499842 | RRT1      |
| YPL036W   | 47.5456157 | 38.3332185 | 45.8784964 | 41.3900494 | 44.0458902 | 40.15648   | -0.068119113 | 5.42630587 | 0.515675829 | PMA2      |
| YLR293C   | 874.168562 | 852.309759 | 796.760589 | 826.263643 | 798.494651 | 781.953836 | -0.068180264 | 9.6826163  | 0.455572481 | GSP1      |
| YGR254W   | 1725.38633 | 1172.90439 | 1520.89031 | 1519.84261 | 1341.90105 | 1352.86019 | -0.068326739 | 10.4909186 | 0.594618913 | ENO1      |
| YNL117W   | 9.27238149 | 6.84932883 | 7.14203505 | 6.09025013 | 7.29754393 | 8.78019499 | -0.06868364  | 2.93981118 | 0.733657715 | MLS1      |
| YOR242C   | 4.01145582 | 4.43191866 | 5.14468627 | 5.02593457 | 4.69127824 | 3.22801286 | -0.068698551 | 2.18817028 | 0.781703263 | SSP2      |
| YGL086W   | 56.4891894 | 57.9602868 | 56.8941775 | 58.1825837 | 52.9723502 | 52.1646879 | -0.068719906 | 5.80509306 | 0.435078866 | MAD1      |
| YNL175C   | 71.3513044 | 81.3285852 | 75.2334709 | 77.8132929 | 74.1482589 | 65.3349804 | -0.068933795 | 6.2161713  | 0.465925096 | NOP13     |
| YML124C   | 203.597823 | 225.222048 | 202.034856 | 219.071619 | 196.251806 | 186.062661 | -0.068957518 | 7.68312007 | 0.474039719 | TUB3      |
| YJR095W   | 0.98642356 | 1.09359032 | 1.1499887  | 0.82780099 | 1.10766292 | 1.16208463 | -0.069037301 | 0.23541777 | 0.932621117 | SFC1      |
| YJR058C   | 28.4089986 | 29.1240369 | 26.1471114 | 27.7313331 | 25.2807772 | 26.279465  | -0.069078036 | 4.77438772 | 0.529523046 | AFS2      |
| YLR251W   | 18.8735708 | 17.9579042 | 15.3130074 | 16.9699203 | 17.0710403 | 15.6235823 | -0.069274448 | 4.09511853 | 0.619991115 | SYM1      |
| YGL038C   | 210.042457 | 191.205633 | 190.050763 | 178.213727 | 183.155321 | 202.138165 | -0.069389332 | 7.58931241 | 0.456219009 | OCH1      |
| YNR040W   | 15.8485386 | 15.7131661 | 12.4077728 | 15.0778037 | 13.1616417 | 13.6222143 | -0.069420622 | 3.85142327 | 0.645850168 | YNR040W   |
| YDR204W   | 42.8107826 | 44.5494161 | 39.0390899 | 44.7012534 | 37.1392861 | 38.5424736 | -0.069477799 | 5.36700425 | 0.510759267 | COQ4      |
| YDR279W   | 24.0687349 | 33.0379391 | 27.0549972 | 27.3765613 | 25.867187  | 27.0507478 | -0.069493466 | 4.78444398 | 0.595622873 | RNH202    |
| YNR013C   | 308.619052 | 243.352624 | 311.162731 | 242.013532 | 287.731732 | 292.716206 | -0.069610688 | 8.13456983 | 0.545829563 | PHO91     |
| YER040W   | 37.549857  | 47.7726297 | 39.7653986 | 36.009343  | 41.4396245 | 41.899607  | -0.069636432 | 5.35308925 | 0.549781639 | GLN3      |
| YMR013C   | 60.8952146 | 53.2981386 | 63.6125326 | 54.5757366 | 57.012062  | 57.7814303 | -0.069796094 | 5.85740414 | 0.45685673  | SEC59     |
| YDL120W   | 30.3160842 | 33.6710703 | 26.5102657 | 29.7417069 | 28.5386093 | 27.9545914 | -0.069796501 | 4.88703665 | 0.549658759 | YFH1      |
| YPR052C   | 110.545201 | 84.0337823 | 88.9728096 | 88.2199339 | 89.785853  | 91.9983666 | -0.069886852 | 6.52918579 | 0.497227584 | NHP6A     |
| YJL071W   | 26.8964825 | 28.83625   | 26.5707914 | 27.7904617 | 27.3006331 | 23.3062529 | -0.069987039 | 4.75053744 | 0.546372159 | ARG2      |
| YPL069C   | 29.0008528 | 37.2971856 | 32.5628378 | 28.5000054 | 31.9919114 | 33.8295748 | -0.070010022 | 5.01489491 | 0.570165841 | BTS1      |
| YGL107C   | 73.7187209 | 82.191946  | 70.0887847 | 76.7022951 | 76.6242113 | 71.0808432 | -0.070033897 | 6.20349429 | 0.451348707 | RMD9      |
| YGL128C   | 13.0865526 | 18.6485928 | 15.5551102 | 12.4761435 | 14.5950879 | 18.076872  | -0.070088089 | 3.95791518 | 0.709577078 | CWC23     |
| YOL134C   | 2.95927069 | 3.97145957 | 3.87364613 | 3.01556074 | 3.19267547 | 4.13185646 | -0.070132008 | 1.86901428 | 0.822203991 | YOL134C   |
| YCL001W-A | 0.72337728 | 0.86336078 | 0.84736009 | 0.76867235 | 0.71672306 | 0.83928334 | -0.070151605 | -0.1222842 | 0.919584304 | YCL001W-A |
| YCR004C   | 155.7234   | 162.081597 | 143.930164 | 158.93779  | 155.072809 | 125.763381 | -0.070153674 | 7.23254665 | 0.490410774 | YCP4      |
| YJL029C   | 83.4514334 | 91.2860128 | 84.4939062 | 82.3661983 | 80.7290798 | 83.8637742 | -0.070344074 | 6.40085275 | 0.395316047 | VPS53     |
| YDR083W   | 56.0946199 | 71.428715  | 65.3677785 | 68.5300961 | 60.402074  | 54.8116584 | -0.070364573 | 5.97566366 | 0.526375106 | RRP8      |
| YNR012W   | 64.8409089 | 70.7955837 | 64.5204184 | 62.6763605 | 63.9838227 | 64.0437752 | -0.070365911 | 6.02844843 | 0.411830298 | URK1      |
| YJR076C   | 127.972017 | 139.058643 | 125.772448 | 130.733427 | 124.253717 | 119.113675 | -0.070393322 | 6.99949201 | 0.411461476 | CDC11     |
| YOR106W   | 16.6376774 | 18.1305763 | 18.3392934 | 15.4917042 | 17.5922934 | 17.56039   | -0.070486205 | 4.122396   | 0.601209736 | VAM3      |
| YFR050C   | 146.51678  | 159.836859 | 140.540724 | 140.548782 | 140.998974 | 144.098494 | -0.070492352 | 7.18542103 | 0.411610255 | PRE4      |
| YOR158W   | 44.7178682 | 48.6935478 | 45.6969192 | 48.2489719 | 43.1336972 | 41.0603236 | -0.070508069 | 5.50461808 | 0.468678031 | PET123    |

|           |             |            |            |            |            |            |              |            |             |           |
|-----------|-------------|------------|------------|------------|------------|------------|--------------|------------|-------------|-----------|
| YDL182W   | 113.109902  | 112.985147 | 110.096286 | 99.5135045 | 110.179882 | 110.52716  | -0.070539737 | 6.77505494 | 0.399973117 | LYS20     |
| YKL186C   | 19.925756   | 24.0014296 | 23.1813511 | 20.1628669 | 20.8501255 | 22.9834516 | -0.070592391 | 4.45843225 | 0.582396575 | MTR2      |
| YIL133C   | 1359.68624  | 1277.25593 | 1300.75827 | 1393.66209 | 1214.78044 | 1141.03799 | -0.070615159 | 10.3234268 | 0.484082974 | RPL16A    |
| YMR100W   | 67.1425639  | 67.3421406 | 68.3335388 | 64.9823776 | 67.762908  | 60.3638405 | -0.070765611 | 6.04690446 | 0.409789632 | MUB1      |
| YGR150C   | 56.8837588  | 66.651452  | 64.823047  | 56.822625  | 62.5503766 | 60.1055995 | -0.070893461 | 5.94110034 | 0.449665077 | CCM1      |
| YGL208W   | 29.0008528  | 28.0304466 | 27.4181515 | 24.7157724 | 27.3006331 | 28.4065132 | -0.071036206 | 4.78632651 | 0.521343961 | SIP2      |
| YLR183C   | 83.2541487  | 80.8105687 | 75.657151  | 75.9211763 | 77.0151512 | 75.2126997 | -0.071171657 | 6.28726548 | 0.388592866 | TOS4      |
| YLL014W   | 57.6728976  | 47.7150723 | 52.8389543 | 44.2873529 | 52.9071935 | 53.3913328 | -0.071318559 | 5.68841747 | 0.505395066 | EMC6      |
| YBR068C   | 644.726441  | 508.059039 | 610.825574 | 524.884955 | 560.477437 | 592.921403 | -0.071489218 | 9.16427649 | 0.502845842 | BAP2      |
| YML108W   | 3.87993268  | 3.39588572 | 3.08681176 | 3.78423309 | 2.9320489  | 3.09889235 | -0.071590442 | 1.8027744  | 0.747383329 | YML108W   |
| YLR446W   | 25.9100589  | 24.1165444 | 24.4523912 | 22.1141121 | 22.8699814 | 25.8886632 | -0.071641102 | 4.60531478 | 0.542401434 | YLR446W   |
| YLR245C   | 7.29953437  | 8.86383731 | 10.1077954 | 8.8692963  | 7.94911036 | 8.19915267 | -0.071792406 | 3.11891685 | 0.684585263 | CDD1      |
| YBR042C   | 96.3407013  | 95.4301446 | 100.654274 | 92.5954534 | 93.5649383 | 92.0629269 | -0.071830818 | 6.57340605 | 0.372170003 | CS26      |
| YLR065C   | 48.9923703  | 57.6724999 | 50.9626569 | 49.6089306 | 49.1281083 | 51.3254045 | -0.071924388 | 5.68423768 | 0.451831016 | ENV10     |
| YBL086C   | 21.9643647  | 23.5985279 | 23.9076597 | 21.7593403 | 23.2609213 | 21.1112041 | -0.071997523 | 4.50651401 | 0.538714115 | YBL086C   |
| YOR378W   | 25.3839664  | 21.0084456 | 21.7892595 | 19.6898378 | 22.5441982 | 22.59609   | -0.072121136 | 4.47725447 | 0.570917822 | AMF1      |
| YIL078W   | 1246.18177  | 1276.27746 | 1237.32731 | 1292.96601 | 1153.27257 | 1130.06274 | -0.072157045 | 10.2559953 | 0.445804947 | THS1      |
| YHR110W   | 62.3419692  | 70.1048951 | 61.4336066 | 66.8153655 | 58.7061347 | 58.8789546 | -0.072217972 | 5.98163855 | 0.444184424 | ERP5      |
| YJR137C   | 172.821408  | 150.455005 | 156.216885 | 154.266627 | 155.463748 | 146.228983 | -0.07224106  | 7.28562551 | 0.412888406 | MET5      |
| YOL013C   | 78.8481235  | 71.7165019 | 72.9334936 | 69.535283  | 72.2587163 | 70.6934817 | -0.07248935  | 6.1854775  | 0.3861683   | HRD1      |
| YIL006W   | 31.1709846  | 23.3682984 | 27.2971001 | 21.8775975 | 27.1703198 | 28.7293145 | -0.073045597 | 4.73848311 | 0.603139971 | YIA6      |
| YCR016W   | 28.0801908  | 36.7791691 | 35.1654438 | 34.2354837 | 31.2100316 | 29.6977183 | -0.073082847 | 5.03038047 | 0.553570042 | YCR016W   |
| YKR059W   | 1898.7996   | 1623.98162 | 1866.49218 | 1596.29595 | 1693.29082 | 1833.38219 | -0.073102509 | 10.7749079 | 0.471537858 | TIF1      |
| YNL327W   | 999.773162  | 888.513354 | 1035.95824 | 766.188943 | 959.496714 | 1053.88164 | -0.073232389 | 9.8928972  | 0.541849134 | EGT2      |
| YPL253C   | 27.9486676  | 29.1815943 | 26.7523686 | 28.0269763 | 23.7170178 | 27.9545914 | -0.073345293 | 4.77597508 | 0.523229653 | VIK1      |
| YBR177C   | 181.173128  | 155.462497 | 171.469367 | 160.711649 | 163.152232 | 168.947353 | -0.073371042 | 7.36864827 | 0.411898556 | EHT1      |
| YML104C   | 144.149363  | 127.89251  | 136.90918  | 129.609983 | 128.554055 | 130.41172  | -0.073385085 | 7.05569246 | 0.382704189 | MDM1      |
| YGR169C   | 22.5562188  | 23.310741  | 21.5471566 | 23.3558136 | 19.2212095 | 21.4340054 | -0.073677906 | 4.46206775 | 0.547201252 | PUS6      |
| YOL046C   | 5.1951641   | 5.18016466 | 5.8104692  | 5.38070642 | 4.69127824 | 5.2939411  | -0.073878953 | 2.4294366  | 0.709319144 | YOL046C   |
| YOL003C   | 66.0246172  | 53.8161551 | 66.2756643 | 50.7915035 | 58.0545683 | 67.9819509 | -0.07388615  | 5.9209956  | 0.531962154 | PFA4      |
| YFL021C-A | 9.40390463  | 5.98596805 | 7.62624082 | 7.33195161 | 7.42785722 | 7.03706804 | -0.073969123 | 2.92127059 | 0.707501187 | YFL021C-A |
| YKL220C   | 16.17295316 | 16.1736252 | 17.128779  | 15.2551896 | 16.028534  | 16.2111066 | -0.074044506 | 4.04801826 | 0.577702633 | FRE2      |
| YDR082W   | 19.7284713  | 22.7927245 | 19.5498078 | 20.4585101 | 19.9379325 | 18.5933541 | -0.074127543 | 4.34442468 | 0.55703229  | STN1      |
| YDL096C   | 32.8807854  | 25.6705938 | 30.3233861 | 27.7313331 | 26.4535968 | 30.1496401 | -0.074151707 | 4.85684134 | 0.537048806 | OPI6      |
| YNL026W   | 76.4807069  | 82.3070608 | 78.5018599 | 78.2271934 | 76.1681148 | 71.016283  | -0.074161943 | 6.27151919 | 0.379957204 | SAM50     |
| YLR239C   | 23.4768808  | 25.4403642 | 23.3024025 | 22.6462699 | 22.6093549 | 23.3708131 | -0.074388669 | 4.56098443 | 0.514379889 | LIP2      |
| YBL067C   | 105.810368  | 109.646819 | 101.441108 | 96.6753297 | 97.7349634 | 106.588985 | -0.074521184 | 6.68801176 | 0.377547197 | UBP13     |
| YOR250C   | 32.5519776  | 37.0093986 | 33.6523008 | 33.4668114 | 32.1222246 | 32.4738094 | -0.074523577 | 5.07396608 | 0.470365178 | CLP1      |
| YGL201C   | 122.579568  | 114.078737 | 117.904104 | 118.84857  | 109.463159 | 108.267551 | -0.074559455 | 6.84946354 | 0.371943187 | MCM6      |
| YBR188C   | 6.7734418   | 7.02200099 | 5.8104692  | 5.79460692 | 6.05956773 | 6.77882701 | -0.074694243 | 2.69944042 | 0.6895988   | NTC20     |
| YJR007W   | 232.795961  | 244.215985 | 228.303019 | 221.555022 | 221.271957 | 226.864744 | -0.074845173 | 7.84107403 | 0.389213912 | SUI2      |
| YPR095C   | 119.028443  | 114.539196 | 124.561933 | 111.04359  | 114.545377 | 114.400077 | -0.074998563 | 6.86388008 | 0.357903116 | SYT1      |
| YCL046W   | 25.0551585  | 23.5409705 | 26.3286885 | 12.1213716 | 26.2581268 | 32.7966107 | -0.075198285 | 4.61062477 | 0.766976913 | YCL046W   |
| YLR169W   | 4.99787939  | 6.38886975 | 5.87099492 | 6.26763605 | 4.95190481 | 5.16482058 | -0.075218168 | 2.52317431 | 0.696832042 | YLR169W   |
| YKL024C   | 78.453554   | 96.0057184 | 81.286043  | 82.9574847 | 79.8168868 | 80.054719  | -0.07533993  | 6.37921374 | 0.422986099 | URA6      |
| YAL055W   | 7.29953437  | 10.4754441 | 8.65517807 | 10.1701264 | 7.88848379 | 7.23074881 | -0.075408106 | 3.12787018 | 0.709627665 | PEX22     |
| YER157W   | 70.7594503  | 79.4291915 | 71.541402  | 71.7230428 | 71.4768366 | 67.2717881 | -0.075571851 | 6.17334197 | 0.385375859 | COG3      |
| YOR021C   | 54.9109117  | 72.925207  | 57.438909  | 65.3371494 | 62.4200633 | 48.0973917 | -0.075601874 | 5.91520187 | 0.562420892 | SFM1      |
| YBL091C-A | 16.1773464  | 15.504494  | 16.7050989 | 16.2012479 | 16.028534  | 13.6867745 | -0.075646986 | 3.98651965 | 0.571552344 | SCS22     |
| YDL051W   | 106.994076  | 135.087183 | 113.546252 | 114.118279 | 113.046774 | 110.39804  | -0.075722496 | 6.85397587 | 0.433611246 | LHP1      |
| YBR090C   | 5.26092567  | 7.30978791 | 6.4157264  | 4.02074766 | 6.51566423 | 7.5535501  | -0.075727635 | 2.65545541 | 0.778180329 | YBR090C   |
| YML099C   | 81.2813016  | 77.9326995 | 79.4097457 | 75.2707613 | 74.3437288 | 76.7621459 | -0.07578244  | 6.27841141 | 0.345971974 | ARG81     |
| YOR347C   | 39.3254194  | 32.1170209 | 37.8285755 | 34.5902556 | 32.7086344 | 36.2828646 | -0.075841726 | 5.15334717 | 0.484250322 | PYK2      |
| YLR102C   | 10.7848976  | 10.4754441 | 9.62358961 | 10.6431556 | 10.0341229 | 8.58651422 | -0.07585584  | 3.3438782  | 0.636361617 | APC9      |
| YJL035C   | 16.243108   | 17.8427894 | 16.5235218 | 17.3246921 | 15.9882207 | 14.7842989 | -0.075877749 | 4.05081127 | 0.572435056 | TAD2      |
| YOR178C   | 34.0644937  | 33.7861851 | 32.3812606 | 31.3381803 | 32.2525379 | 31.5054055 | -0.075882927 | 5.03026749 | 0.44365119  | GAC1      |
| YPR107C   | 12.6262216  | 15.5980514 | 11.0156812 | 12.4761435 | 13.7480515 | 11.039804  | -0.075952971 | 3.6877401  | 0.666130898 | YTH1      |
| YJL085W   | 29.7899916  | 36.3762674 | 36.0733296 | 28.3226195 | 34.6633337 | 34.1523761 | -0.076022434 | 5.05999288 | 0.537766573 | EXO70     |
| YPL172C   | 61.0924993  | 54.5068437 | 56.5915489 | 52.68362   | 51.9950005 | 58.6207136 | -0.076025036 | 5.80811414 | 0.411752077 | COX10     |
| YGR106C   | 536.548657  | 427.133355 | 509.566043 | 489.703413 | 456.552592 | 451.147078 | -0.076100422 | 8.90254297 | 0.460732206 | VOA1      |
| YDR372C   | 123.631753  | 136.295888 | 127.951374 | 127.836124 | 122.559644 | 117.564228 | -0.076161402 | 6.97856255 | 0.367854697 | VPS74     |
| YPR149W   | 517.148993  | 381.432791 | 465.987524 | 480.479345 | 433.487141 | 380.259915 | -0.076173042 | 8.79196411 | 0.533111766 | NCE102    |
| YER177W   | 1108.27975  | 1179.81128 | 1131.70993 | 1069.99191 | 1073.97693 | 1099.71942 | -0.076298761 | 10.1172694 | 0.3959374   | BMH1      |
| YIL089W   | 5.06364096  | 7.42490268 | 6.1130978  | 5.32157778 | 6.71113415 | 5.68130264 | -0.076406761 | 2.62917627 | 0.729082531 | YIL089W   |
| YOR228C   | 25.0551585  | 16.9794286 | 19.4892821 | 20.1628669 | 19.2212095 | 18.8515951 | -0.07643641  | 4.32647363 | 0.610157475 | MCP1      |
| YPL033C   | 1.05218513  | 1.09359032 | 0.96841153 | 0.94605827 | 0.78187971 | 1.22664489 | -0.076450834 | 0.18358614 | 0.931352868 | SRL4      |
| YDR381C-A | 4.99787939  | 6.2161976  | 3.81312041 | 5.67634963 | 4.49580832 | 4.06729621 | -0.076538191 | 2.32701479 | 0.767531071 | YDR381C-A |
| YLL063C   | 18.7420477  | 14.2166741 | 14.949853  | 16.9107916 | 14.2693047 | 14.1386963 | -0.07664359  | 3.96857913 | 0.616069757 | AYT1      |
| YJL002C   | 624.537639  | 511.915383 | 600.596727 | 502.593457 | 550.378157 | 593.954367 | -0.076834254 | 9.13979944 | 0.466511585 | OST1      |
| YPL142C   | 157.235916  | 179.636599 | 156.398463 | 149.063307 | 160.545967 | 158.10807  | -0.077122687 | 7.32460058 | 0.397213161 | YPL142C   |
| YML031C-A | 8.22019636  | 5.98596805 | 7.38413794 | 5.79460692 | 7.16723065 | 7.48898984 | -0.077182438 | 2.83009674 | 0.685651965 | YML031C-A |
| YER086W   | 519.910979  | 409.923697 | 491.105699 | 452.984526 | 451.796157 | 441.979521 | -0.077223386 | 8.8498476  | 0.451920461 | ILV1      |
| YOR081C   | 128.563871  | 110.855524 | 130.97766  | 101.583007 | 125.75232  | 123.762013 | -0.077339992 | 6.91109616 | 0.454867842 | TGL5      |

|           |            |            |            |            |            |            |              |            |             |             |
|-----------|------------|------------|------------|------------|------------|------------|--------------|------------|-------------|-------------|
| YLL011W   | 86.8710351 | 88.8110453 | 86.7333579 | 81.1244968 | 84.508165  | 83.0890511 | -0.077574698 | 6.41473105 | 0.332759049 | SOF1        |
| YNL216W   | 188.538424 | 185.737682 | 186.298169 | 182.530118 | 177.030597 | 171.536604 | -0.077806439 | 7.50837977 | 0.361809548 | RAP1        |
| YDR468C   | 16.3088696 | 18.9939371 | 16.7050989 | 16.4377625 | 16.8104137 | 16.0755041 | -0.077829791 | 4.08941696 | 0.557441097 | TLG1        |
| YAR050W   | 31.6970772 | 26.4188398 | 30.0207575 | 26.9626608 | 27.1703198 | 29.3103568 | -0.077915429 | 4.84339304 | 0.490071911 | FLO1        |
| YLR289W   | 17.3610547 | 16.9218712 | 17.9156134 | 15.6099615 | 17.9180766 | 15.9463835 | -0.077957221 | 4.09301082 | 0.554934441 | GUF1        |
| YBR078W   | 2547.53749 | 2057.67652 | 2488.75711 | 1914.28979 | 2297.22774 | 2509.19896 | -0.077979319 | 11.1690108 | 0.517045435 | ECM33       |
| YBR194W   | 2.49893969 | 3.45344311 | 3.26838892 | 3.60684716 | 2.86689226 | 2.259609   | -0.078081214 | 1.6472505  | 0.777928667 | AIM4        |
| YGR019W   | 74.1790519 | 75.4001745 | 70.0887847 | 71.1317563 | 65.4824255 | 71.4036445 | -0.078404533 | 6.15807575 | 0.356168896 | UGA1        |
| YKL115C   | 1.05218513 | 1.84183632 | 1.4526173  | 1.35995877 | 1.43344613 | 1.3557654  | -0.078422315 | 0.62972964 | 0.890111136 | YKL115C     |
| YIR032C   | 3.28807854 | 3.22321357 | 4.23680046 | 3.31120395 | 3.19267547 | 3.67993466 | -0.078477799 | 1.85338991 | 0.752666778 | DAL3        |
| YLR144C   | 86.2134194 | 80.2925523 | 88.004398  | 70.7769845 | 86.6583342 | 83.6700934 | -0.078482497 | 6.37001171 | 0.409677072 | ACF2        |
| YBR049C   | 120.804006 | 126.453575 | 115.240972 | 116.365167 | 112.981618 | 113.948854 | -0.078548482 | 6.87975101 | 0.338462814 | REB1        |
| YPR099C   | 14.7305919 | 12.3748378 | 15.0709045 | 13.3630731 | 14.9860277 | 11.5562861 | -0.078681516 | 3.78628223 | 0.611081042 | YPR099C     |
| YOR063W   | 5421.25238 | 5404.23556 | 5472.61462 | 5189.48439 | 5205.8854  | 5037.12039 | -0.078732922 | 12.3686588 | 0.377623477 | RPL3        |
| YBR074W   | 270.214295 | 217.682031 | 268.249995 | 222.441951 | 240.81895  | 252.624287 | -0.078840814 | 7.9392344  | 0.451904405 | PF11        |
| YAR042W   | 153.882076 | 129.561674 | 140.117044 | 133.039445 | 135.460659 | 132.413088 | -0.078863404 | 7.1035358  | 0.373501673 | SWH1        |
| YER068W   | 70.6936887 | 77.2420109 | 66.9414472 | 64.6867344 | 68.0886912 | 70.758042  | -0.078910606 | 6.1264517  | 0.38043587  | MOT2        |
| YLR420W   | 83.3856719 | 115.402557 | 88.4280781 | 87.214747  | 94.4119746 | 90.4489204 | -0.078962939 | 6.54478167 | 0.488215431 | URA         |
| YNL188W   | 19.005094  | 18.9363797 | 20.7603222 | 18.2116217 | 20.9152822 | 16.4628656 | -0.078992096 | 4.26099477 | 0.564653942 | KAR1        |
| YPL227C   | 52.0174026 | 63.8311401 | 50.0547711 | 50.4958603 | 51.3734744 | 55.19902   | -0.079072233 | 5.7544327  | 0.459401214 | ALG5        |
| YGR163W   | 50.3733633 | 56.8091391 | 52.6573771 | 57.47304   | 48.2810719 | 45.5149814 | -0.079108106 | 5.70046677 | 0.452939506 | GTR2        |
| YLR243W   | 30.184561  | 45.873236  | 34.8022895 | 39.6753188 | 34.0769239 | 31.2471645 | -0.079111104 | 5.17572962 | 0.59170533  | GPN3        |
| YOR342C   | 74.9681908 | 94.6818986 | 81.1044659 | 71.3682709 | 84.7687916 | 81.4104844 | -0.079208125 | 6.34904387 | 0.44891857  | YOR342C     |
| YBR259W   | 23.6084039 | 31.6565618 | 30.7470662 | 23.7697141 | 28.6689226 | 29.116676  | -0.079291384 | 4.81061494 | 0.567687454 | YBR259W     |
| YDL107W   | 8.02291165 | 9.78475547 | 8.41307519 | 8.63278173 | 7.29754393 | 8.993155   | -0.079306523 | 3.11228709 | 0.659216545 | MSS2        |
| YOR387C   | 4.47178682 | 4.08657435 | 4.05522329 | 4.25726222 | 3.45330204 | 4.19641672 | -0.07939373  | 2.07448161 | 0.714602042 | YOR387C     |
| YHR191C   | 5.39244881 | 6.90688622 | 5.87099492 | 6.74066519 | 6.84144744 | 3.61537441 | -0.079488423 | 2.593696   | 0.754840526 | CTF8        |
| YOR061W   | 74.5736214 | 82.4221755 | 75.5360996 | 74.7386035 | 75.0604519 | 70.3061202 | -0.079582395 | 6.23984218 | 0.351285082 | CKA2        |
| YPR025C   | 19.6627097 | 22.9653967 | 20.3971679 | 19.8672237 | 20.7198122 | 19.1098361 | -0.079654239 | 4.36378767 | 0.522745342 | CCL1        |
| YPL014W   | 46.1646227 | 44.5494161 | 50.6600283 | 42.2178504 | 48.085602  | 43.5136134 | -0.079685659 | 5.52307847 | 0.417195379 | YPL014W     |
| YOR372C   | 68.7208416 | 87.7750123 | 76.9887169 | 66.4605936 | 74.2134155 | 80.4420806 | -0.079718482 | 6.24608046 | 0.455674565 | NDD1        |
| YGL246C   | 33.406878  | 48.8086626 | 41.4601187 | 40.798763  | 37.0089729 | 39.3171967 | -0.079765774 | 5.33243348 | 0.535244252 | RAI1        |
| YKL018W   | 54.4505807 | 53.355696  | 59.4362578 | 50.377603  | 52.2556271 | 55.6509418 | -0.07976703  | 5.76490988 | 0.385009716 | SWD2        |
| YDR352W   | 62.2762076 | 53.5283682 | 60.8888751 | 48.5446151 | 55.5134592 | 63.1399316 | -0.079839355 | 5.84343578 | 0.462675117 | YQP2        |
| YDL180W   | 82.0704404 | 65.7880912 | 76.6860882 | 67.05188   | 68.8054142 | 76.5039049 | -0.079946729 | 6.18828678 | 0.42213699  | YDL180W     |
| YEL022W   | 224.904572 | 227.927245 | 212.929486 | 206.536347 | 216.580679 | 206.592823 | -0.080363397 | 7.75513234 | 0.35759867  | GEA2        |
| YLR182W   | 77.993223  | 83.3430937 | 78.1992313 | 77.458521  | 78.6440672 | 70.4352407 | -0.080631388 | 6.28193141 | 0.345768517 | SWI6        |
| YGR250C   | 83.1226256 | 85.8756186 | 78.3202827 | 74.0881884 | 77.3409344 | 82.5080088 | -0.080646841 | 6.3279114  | 0.347672817 | YGR250C     |
| YMR222C   | 42.0216438 | 32.9228243 | 35.0443923 | 35.0041561 | 32.5783211 | 36.2828646 | -0.080954236 | 5.15992624 | 0.474152189 | FSH2        |
| YMR154C   | 23.6084039 | 22.7351671 | 23.3629282 | 21.4045684 | 22.3487283 | 22.1441682 | -0.081059859 | 4.50602547 | 0.47171126  | RIM13       |
| YOR181W   | 90.4879215 | 72.4647479 | 100.109542 | 75.3890186 | 84.7687916 | 88.5121127 | -0.081074442 | 6.41603204 | 0.47732318  | LAS17       |
| YDR385W   | 7664.57685 | 5560.44631 | 6901.74794 | 6399.90683 | 6244.22165 | 6380.0383  | -0.081272542 | 12.6718187 | 0.481444672 | EFT2        |
| YMR179W   | 49.649986  | 48.0604166 | 49.9942454 | 41.7448213 | 49.5842048 | 48.3556327 | -0.081294318 | 5.58532075 | 0.401788773 | SPT21       |
| YDR370C   | 41.3640281 | 50.3051546 | 43.0943132 | 40.1483479 | 42.7427573 | 44.6111378 | -0.081433667 | 5.45438134 | 0.43663718  | DXO1        |
| YLR178C   | 54.3190575 | 52.2621057 | 50.7810797 | 47.1846563 | 48.085602  | 53.455893  | -0.081511866 | 5.67618799 | 0.378263337 | TFS1        |
| YLL048C   | 635.519821 | 532.46337  | 667.901329 | 525.298856 | 589.602456 | 620.101271 | -0.081531996 | 9.21735586 | 0.454499246 | YBT1        |
| YJL006C   | 14.0072146 | 23.5409705 | 14.8288016 | 15.6690901 | 16.0936906 | 17.818631  | -0.081681594 | 4.09980395 | 0.672569976 | CTK2        |
| YCL008C   | 66.813756  | 52.7225648 | 58.0441662 | 53.8661929 | 56.9469053 | 56.8775866 | -0.081771561 | 5.84922159 | 0.412748534 | STP22       |
| YNR021W   | 434.355176 | 359.618542 | 428.158949 | 336.501122 | 384.424189 | 433.780369 | -0.081877579 | 8.63022319 | 0.469890222 | YOR021W     |
| YNL071W   | 643.542733 | 595.718936 | 645.446287 | 603.615257 | 603.066604 | 590.209872 | -0.08192399  | 9.25505014 | 0.362094637 | LAT1        |
| YIL099W   | 7.2337728  | 7.13711576 | 7.68676654 | 7.39108025 | 7.36270058 | 6.06866418 | -0.081952271 | 2.86295751 | 0.637463672 | SGA1        |
| YCR011C   | 337.093812 | 297.686796 | 320.241589 | 316.98865  | 288.057515 | 297.106304 | -0.081955275 | 8.27450226 | 0.375618289 | ADP1        |
| YIL158W   | 28.6062833 | 30.5629715 | 28.9312945 | 26.5487603 | 28.0825128 | 28.6647542 | -0.081967898 | 4.84261538 | 0.439881574 | AIM20       |
| YDR363W   | 21.8986031 | 20.2601996 | 21.1234766 | 19.8672237 | 20.0030892 | 19.8845592 | -0.081987743 | 4.36646697 | 0.481374503 | ESC2        |
| YHR054C   | 30.3818457 | 42.0168912 | 39.3417185 | 38.6701319 | 36.1619365 | 30.7952427 | -0.081988278 | 5.18534918 | 0.537060521 | YHR054C     |
| YOR334W   | 35.5770098 | 34.7071032 | 36.4364839 | 33.9989692 | 33.3602008 | 33.4422133 | -0.081997857 | 5.11741209 | 0.391950022 | MRS2        |
| YLR276C   | 113.635994 | 138.598183 | 123.714573 | 119.794629 | 116.82586  | 118.661753 | -0.082034849 | 6.93092945 | 0.369975956 | DBP9        |
| YDR145W   | 70.1675961 | 79.7169784 | 76.6860882 | 71.2500136 | 72.4541862 | 70.4352407 | -0.08208329  | 6.20140689 | 0.338755153 | TAF12       |
| YDL091C   | 34.3933016 | 37.815202  | 32.1996835 | 35.3589279 | 32.2525379 | 30.9889235 | -0.082348821 | 5.08635135 | 0.448833732 | UBX3        |
| YLR176C   | 30.1187995 | 32.8652669 | 28.3865631 | 27.6722045 | 27.8870429 | 30.7952427 | -0.082368798 | 4.89477384 | 0.456549024 | RFX1        |
| YMR014W   | 48.9266087 | 55.4853193 | 51.1442341 | 50.4958603 | 50.9524942 | 45.5149814 | -0.082480412 | 5.46987937 | 0.386347581 | BDU22       |
| YOR360C   | 229.770929 | 201.911307 | 260.200074 | 168.043601 | 228.178561 | 257.272625 | -0.082495276 | 7.80943848 | 0.556209794 | PDE2        |
| YJL065C   | 17.8898626 | 20.778216  | 16.9472018 | 16.9699203 | 18.8302696 | 16.5919861 | -0.082515677 | 4.17792415 | 0.554027104 | DLS1        |
| YLR321C   | 50.8336943 | 53.643483  | 46.4232278 | 48.1307146 | 49.9751446 | 44.417457  | -0.082535428 | 5.61570667 | 0.391572342 | SFH1        |
| YNL090W   | 25.3839664 | 24.058987  | 19.0656021 | 24.2427432 | 17.0710403 | 23.3062529 | -0.082737289 | 4.48024922 | 0.597196913 | RHO2        |
| YDR329C   | 44.3232988 | 47.7726297 | 46.8469079 | 41.449178  | 45.9354328 | 43.9009749 | -0.082887064 | 5.49712943 | 0.37367935  | PEX3        |
| YPR115W   | 147.305919 | 135.720314 | 144.353844 | 126.003136 | 138.197238 | 139.321035 | -0.082908837 | 7.11475003 | 0.334393432 | RG1         |
| YAL063C-A | 0.32880785 | 0.11511477 | 0.3026286  | 0.1085728  | 0.39093985 | 0.19368077 | -0.08294143  | -1.4676927 |             | 1 YAL063C-A |
| YBR061C   | 41.1667434 | 49.4993512 | 46.3021764 | 45.6473116 | 40.3319616 | 43.3844929 | -0.082948852 | 5.47688141 | 0.419011195 | TRM7        |
| YDR275W   | 16.5061543 | 14.792248  | 18.5813963 | 18.0933645 | 14.2693047 | 14.6551784 | -0.082997335 | 4.02533765 | 0.579768392 | BSC2        |
| YNR036C   | 94.4336158 | 82.4221755 | 88.4886038 | 87.037361  | 76.9499945 | 86.3816242 | -0.083003015 | 6.42749028 | 0.354969205 | MRPS12      |
| YJL216C   | 15.7170154 | 15.2527071 | 14.526173  | 15.9647333 | 14.3344613 | 12.5892502 | -0.083271865 | 3.8936232  | 0.568622155 | IMA5        |
| YKR106W   | 9.99575877 | 12.7777395 | 9.92621821 | 9.40145408 | 9.2522432  | 12.2664489 | -0.083353437 | 3.42437171 | 0.647950385 | GEX2        |

|           |            |            |            |            |            |            |              |            |             |           |
|-----------|------------|------------|------------|------------|------------|------------|--------------|------------|-------------|-----------|
| YOR060C   | 8.08867322 | 9.15162424 | 8.71570379 | 6.85892247 | 7.75364043 | 9.94227962 | -0.083357802 | 3.09434634 | 0.664790539 | SLD7      |
| YNL025C   | 20.5176101 | 21.526462  | 19.9129621 | 18.7437795 | 20.394029  | 19.3680772 | -0.083628523 | 4.33644582 | 0.486515259 | SSN8      |
| YMR061W   | 85.358519  | 96.5812923 | 81.6491974 | 82.1888124 | 82.879249  | 83.7346537 | -0.083768495 | 6.41841337 | 0.345147832 | RNA14     |
| YKR078W   | 18.1501936 | 20.317757  | 18.4603448 | 17.4429494 | 18.6999563 | 17.6249502 | -0.083782741 | 4.21564996 | 0.515930307 | YKR078W   |
| YDR259C   | 5.06364096 | 5.64062374 | 5.99204636 | 5.26244914 | 5.79894116 | 4.71289878 | -0.083827321 | 2.47011767 | 0.675734391 | YAP6      |
| YKL034W   | 112.057717 | 84.1488971 | 106.041063 | 91.7085238 | 92.8482152 | 100.520321 | -0.083844149 | 6.61455038 | 0.428817464 | TUL1      |
| YMR290C   | 228.784505 | 242.949723 | 237.926608 | 232.789464 | 222.77056  | 213.952693 | -0.084016611 | 7.84548402 | 0.341475306 | HAS1      |
| YER170W   | 12.4946985 | 15.0800349 | 14.8893273 | 12.890044  | 12.5100753 | 14.7197387 | -0.084028083 | 3.79689151 | 0.584132968 | ADK2      |
| YGR054W   | 331.767125 | 289.513647 | 342.938734 | 284.053996 | 313.273136 | 312.213404 | -0.084204024 | 8.28726492 | 0.387351162 | YGR054W   |
| YDR212W   | 359.978839 | 344.998967 | 370.356886 | 354.357952 | 333.667165 | 326.22298  | -0.084275418 | 8.44457259 | 0.345801657 | TCP1      |
| YDR294C   | 188.604185 | 176.068041 | 186.237643 | 170.881775 | 172.925729 | 175.73302  | -0.084482584 | 7.48000918 | 0.324734795 | DPL1      |
| YHR021C   | 810.577123 | 586.624869 | 685.937994 | 621.146384 | 652.869555 | 690.536512 | -0.084484014 | 9.39811912 | 0.467731029 | RPS27B    |
| YER021W   | 227.535035 | 282.606761 | 230.845099 | 236.632825 | 230.71967  | 231.513083 | -0.084626782 | 7.90762235 | 0.404386704 | RPN3      |
| YPR169C-A | 4.14297896 | 5.4103942  | 4.59995478 | 4.43464815 | 3.97455518 | 4.97113981 | -0.084638767 | 2.23963937 | 0.719959771 | LSO2      |
| YIL142C-A | 12.2316522 | 10.9934606 | 11.1972583 | 6.50415062 | 12.2494487 | 13.7513348 | -0.084687388 | 3.4915074  | 0.730206325 | YIL142C-A |
| YPR133W-A | 0.39456943 | 1.1511477  | 0.42368005 | 0.59128642 | 0.52125314 | 0.77472309 | -0.084693147 | -0.3702165 | 0.916093892 | TOM5      |
| YNL123W   | 268.307209 | 269.368562 | 269.944715 | 249.108969 | 256.977797 | 255.464938 | -0.084777971 | 8.03151534 | 0.325915063 | NMA111    |
| YPL255W   | 29.4611837 | 26.7066267 | 29.7786546 | 27.6722045 | 25.867187  | 27.4381093 | -0.084826301 | 4.80444721 | 0.431478797 | BBP1      |
| YER090W   | 152.040752 | 162.829843 | 135.577615 | 135.700233 | 139.760998 | 149.327875 | -0.084827282 | 7.18981744 | 0.360980964 | TRP2      |
| YDR469W   | 12.8892679 | 16.1160678 | 10.834104  | 13.8361022 | 11.3372558 | 12.3955694 | -0.084846642 | 3.70553676 | 0.629330657 | SDC1      |
| YPL219W   | 44.8493913 | 46.3912524 | 41.0364387 | 42.8091368 | 41.2441546 | 40.6084018 | -0.085340843 | 5.42471478 | 0.365022578 | PCL8      |
| YGL042C   | 7.56258065 | 6.9644436  | 7.14203505 | 8.75103902 | 7.23238729 | 4.39009749 | -0.085397099 | 2.8366592  | 0.72520706  | YGL042C   |
| YCL009C   | 561.866861 | 413.146911 | 516.82913  | 468.003202 | 459.093701 | 478.778868 | -0.085497938 | 8.91604298 | 0.445283234 | ILV6      |
| YPR033C   | 448.165105 | 488.029069 | 457.211295 | 444.056101 | 430.750562 | 438.428707 | -0.085532036 | 8.81775942 | 0.336710691 | HTS1      |
| YBR204C   | 27.0937622 | 30.7356437 | 26.6918429 | 27.8495904 | 26.1929702 | 25.6304421 | -0.085562686 | 4.781588   | 0.44772135  | LDH1      |
| YER010C   | 64.512101  | 55.139975  | 65.6704071 | 58.8921274 | 52.7768802 | 62.8816906 | -0.085653592 | 5.9092238  | 0.396269591 | YER010C   |
| YLR139C   | 60.6321683 | 58.5358607 | 70.9361448 | 49.7863166 | 62.6806899 | 66.755306  | -0.085804687 | 5.94635727 | 0.463483455 | SLS1      |
| YDR036C   | 97.8532174 | 94.6818986 | 97.2043076 | 88.1016766 | 91.5450824 | 93.354132  | -0.085906449 | 6.55322132 | 0.286911205 | EHD3      |
| YBL077W   | 102.719574 | 85.18493   | 86.2491521 | 78.286322  | 88.5478768 | 91.4173243 | -0.085966017 | 6.47304696 | 0.385167468 | YBL077W   |
| YOR064C   | 16.3746311 | 17.0945434 | 16.0998417 | 16.0829906 | 14.2693047 | 16.3337451 | -0.086192305 | 4.01559653 | 0.521769162 | YNG1      |
| YDR274W   | 82.4650099 | 97.73244   | 84.1307519 | 84.6130867 | 81.4458028 | 83.0244908 | -0.086203993 | 6.42140278 | 0.3396021   | MCM5      |
| YDL043C   | 14.0072146 | 18.8788223 | 17.9761391 | 18.9211654 | 15.116341  | 13.8804553 | -0.086214553 | 4.05501526 | 0.610536675 | PRP11     |
| YNL086W   | 5.06364096 | 5.52550897 | 5.99204636 | 5.38070642 | 4.6261216  | 5.61674238 | -0.086322371 | 2.45901521 | 0.673781296 | SNN1      |
| YJR093C   | 30.644892  | 34.9373328 | 29.1733974 | 28.5000054 | 29.320489  | 31.5054055 | -0.086356165 | 4.94538336 | 0.441664993 | FIP1      |
| YLR192C   | 194.325442 | 220.675015 | 193.863884 | 207.896305 | 188.889106 | 176.636864 | -0.08650923  | 7.62347381 | 0.377682782 | HCR1      |
| YCR077C   | 331.635602 | 306.320404 | 340.215077 | 304.80815  | 317.508318 | 298.849431 | -0.086571504 | 8.30686445 | 0.336238454 | PAT1      |
| YGL002W   | 39.1281347 | 34.4193163 | 36.6180611 | 35.2997993 | 33.5556708 | 34.7979787 | -0.086622553 | 5.16010761 | 0.381052216 | ERP6      |
| YNL084C   | 50.8994559 | 68.9537474 | 54.2915716 | 57.650426  | 52.7117236 | 53.714134  | -0.086699224 | 5.82082895 | 0.446528591 | END3      |
| YHR064C   | 1215.40535 | 988.432975 | 1067.31056 | 1011.33629 | 997.548193 | 1071.31291 | -0.086725853 | 10.0480294 | 0.392881717 | SSZ1      |
| YDL119C   | 11.7713212 | 15.3678218 | 13.5577615 | 10.5248983 | 13.6177382 | 14.2678169 | -0.087181179 | 3.73469055 | 0.61594391  | YDL119C   |
| YKL112W   | 128.629633 | 136.929019 | 136.90918  | 135.522847 | 125.100753 | 118.209831 | -0.087204017 | 7.02632672 | 0.313195833 | ABF1      |
| YOR241W   | 88.120505  | 109.761933 | 94.6622273 | 86.3278173 | 96.3015173 | 92.9022102 | -0.087348964 | 6.56707517 | 0.371448469 | MET7      |
| YDR228C   | 57.8701824 | 73.9036825 | 61.130978  | 61.9668168 | 56.7514354 | 62.9462508 | -0.087379295 | 5.96755148 | 0.401892101 | CFP11     |
| YDR043C   | 11.3767518 | 13.095756  | 7.98939514 | 11.5300852 | 9.9038962  | 9.29667705 | -0.087389932 | 3.42020912 | 0.668610836 | NRC1      |
| YJL203W   | 10.2588051 | 11.6265918 | 9.19990956 | 9.81535457 | 10.3599061 | 9.10299627 | -0.087429182 | 3.34928646 | 0.602816232 | PRP21     |
| YLR221C   | 21.6355568 | 26.1886102 | 23.4234539 | 25.7800879 | 21.5668486 | 19.6908785 | -0.087632583 | 4.5360156  | 0.517790297 | RSA3      |
| YDL040C   | 314.669117 | 342.869343 | 304.262798 | 310.543628 | 297.374915 | 297.170864 | -0.087708219 | 8.28209312 | 0.333165105 | NAT1      |
| YLR210W   | 33.406878  | 32.57748   | 33.2891464 | 34.1763551 | 30.4933086 | 28.6647542 | -0.087755442 | 5.01056187 | 0.407823868 | CLB4      |
| YOR030W   | 53.5956803 | 57.6724999 | 54.9573545 | 51.855819  | 51.6040607 | 53.0039712 | -0.087823342 | 5.75257093 | 0.311641963 | RKM3      |
| YBR145C   | 97.7874559 | 106.135818 | 103.25688  | 89.6390213 | 94.9983844 | 104.523057 | -0.087828371 | 6.63686852 | 0.322466671 | PN01      |
| YDR245W   | 122.776853 | 132.266871 | 125.046139 | 124.879692 | 113.958967 | 118.790873 | -0.087862931 | 6.94358835 | 0.294059187 | MNN10     |
| YLR154W-C | 712.263574 | 459.307933 | 1086.43669 | 826.322772 | 450.818808 | 847.353377 | -0.087902394 | 9.51283517 | 0.734335917 | TAR1      |
| YNR027W   | 43.4026368 | 39.6570384 | 42.4285303 | 41.7448213 | 38.8333588 | 37.380389  | -0.088019118 | 5.34697633 | 0.361232737 | BUD17     |
| YDR420W   | 244.50152  | 210.199571 | 241.921306 | 178.864142 | 230.198417 | 246.361942 | -0.088050579 | 7.81657564 | 0.459315684 | HKR1      |
| YNL079C   | 169.599091 | 193.392814 | 183.635037 | 195.774934 | 166.540378 | 151.910285 | -0.088054663 | 7.46729992 | 0.404198866 | TPM1      |
| YNL035C   | 49.4527013 | 58.0178442 | 52.233697  | 54.2209647 | 46.6521559 | 49.3885968 | -0.088071468 | 5.69511472 | 0.376330711 | YNL035C   |
| YMR085W   | 7.8913885  | 8.00047653 | 7.5657151  | 8.21888124 | 6.7762908  | 7.03706804 | -0.088108871 | 2.94754395 | 0.597882246 | YMR085W   |
| YNL127W   | 50.7021711 | 58.881205  | 52.4757999 | 48.6037437 | 52.9723502 | 51.0026032 | -0.088177647 | 5.71624299 | 0.354493478 | FAR11     |
| YOR020C   | 57.6071361 | 76.9542239 | 57.6204862 | 74.6794749 | 58.2500382 | 47.8391506 | -0.088188245 | 5.96187561 | 0.556075093 | HSP10     |
| YDR064W   | 2586.86291 | 2121.91056 | 2380.83975 | 2440.17993 | 2238.84738 | 1989.68257 | -0.088267125 | 11.16313   | 0.421688655 | RPS13     |
| YBL010C   | 12.4946985 | 13.756215  | 15.0709045 | 14.8412891 | 12.9661718 | 11.039804  | -0.088329417 | 3.75532987 | 0.58856407  | YBL010C   |
| YER036C   | 765.727731 | 713.366231 | 721.224489 | 697.717976 | 684.60084  | 687.243939 | -0.088341741 | 9.47526413 | 0.322761405 | ARB1      |
| YDR302W   | 37.8129032 | 35.1675623 | 41.0364387 | 34.2354837 | 34.2723938 | 38.7361544 | -0.088360255 | 5.20931152 | 0.40164833  | GP11      |
| YDL228C   | 802.356926 | 586.509755 | 676.859136 | 745.789562 | 618.597162 | 578.330785 | -0.088439187 | 9.38411448 | 0.486888275 | YDL228C   |
| YAL062W   | 50.1760786 | 41.2686451 | 46.7863822 | 41.8039499 | 42.5472874 | 45.5795416 | -0.088475418 | 5.48551866 | 0.380352512 | GDH3      |
| YLR304C   | 819.060365 | 687.522966 | 776.666049 | 725.449309 | 732.360659 | 689.180746 | -0.088702288 | 9.52842819 | 0.362908506 | ACO1      |
| YKL076C   | 3.87993268 | 1.95695109 | 2.96576032 | 2.83817482 | 2.54110905 | 2.84065132 | -0.088880726 | 1.55959809 | 0.780878682 | PSY1      |
| YGR263C   | 40.2460814 | 36.5489396 | 44.7285077 | 35.5363138 | 39.8758651 | 38.8652749 | -0.088902339 | 5.30068622 | 0.406081997 | SAY1      |
| YER133W   | 135.731882 | 170.484975 | 147.80381  | 153.202311 | 141.84601  | 131.896606 | -0.088908785 | 7.19949148 | 0.379454737 | GLC7      |
| YBR039W   | 186.30253  | 244.561329 | 194.892821 | 212.449211 | 191.430215 | 184.513215 | -0.088966553 | 7.66189808 | 0.427993891 | ATP3      |
| YMR212C   | 211.357689 | 186.140584 | 197.979633 | 192.995888 | 187.781443 | 178.961033 | -0.088997782 | 7.58988087 | 0.326736713 | EFR3      |
| YDR182W   | 99.6945414 | 100.264965 | 97.1437819 | 92.4180675 | 91.610239  | 95.2909397 | -0.089079751 | 6.58791677 | 0.265999357 | CDC1      |
| YMR171C   | 107.848976 | 111.431098 | 112.214686 | 106.431556 | 102.361085 | 102.77993  | -0.089410081 | 6.74564868 | 0.264704279 | EAR1      |

|           |            |            |            |            |            |            |              |            |             |           |
|-----------|------------|------------|------------|------------|------------|------------|--------------|------------|-------------|-----------|
| YBR230W-A | 1.5782777  | 0.92091816 | 0.84736009 | 1.59647333 | 0.71672306 | 0.77472309 | -0.089467746 | 0.26004175 | 0.824334465 | YBR230W-A |
| YLL066C   | 129.879102 | 114.366524 | 142.659124 | 118.789442 | 128.814682 | 115.950222 | -0.089678199 | 6.96801034 | 0.353347529 | YLL066C   |
| YBL085W   | 148.029296 | 148.670726 | 149.740633 | 132.80293  | 146.863072 | 139.902077 | -0.089784216 | 7.17449016 | 0.281883542 | BOI1      |
| YKL082C   | 58.6593212 | 65.0398452 | 67.2440758 | 61.612045  | 62.4200633 | 55.3927007 | -0.090159663 | 5.95108568 | 0.330967336 | RRP14     |
| YCR066W   | 23.4111192 | 21.4689047 | 22.6366196 | 21.2271825 | 21.3713787 | 20.7884028 | -0.090165243 | 4.45538237 | 0.430511077 | RAD18     |
| YER115C   | 17.0322469 | 19.8572979 | 15.6761617 | 16.023862  | 17.2665102 | 16.1400643 | -0.090187354 | 4.09855458 | 0.521665922 | SPR6      |
| YHR098C   | 384.179097 | 335.271768 | 389.967219 | 335.732429 | 347.024277 | 359.277832 | -0.090339711 | 8.48658813 | 0.339403906 | SFB3      |
| YPR031W   | 38.7993268 | 41.5564321 | 37.6469983 | 34.6493842 | 38.246949  | 38.0259915 | -0.090360698 | 5.25848147 | 0.363647179 | NT01      |
| YHR101C   | 22.6877419 | 24.058987  | 23.6655568 | 23.119299  | 22.4138849 | 20.5947221 | -0.090492141 | 4.51670648 | 0.432954468 | BIG1      |
| YAL061W   | 59.9087911 | 52.3772205 | 56.5310232 | 50.4958603 | 54.9270494 | 53.0685315 | -0.090660929 | 5.77249691 | 0.322298889 | BDH2      |
| YPR193C   | 1.84132398 | 1.32381986 | 1.7552459  | 1.18257284 | 2.01985591 | 1.42032566 | -0.090822088 | 0.77025948 | 0.800969359 | HPA2      |
| YML030W   | 17.9529088 | 18.9363797 | 14.8288016 | 18.8620368 | 16.3543172 | 13.299413  | -0.090860896 | 4.0742967  | 0.577571885 | RCF1      |
| YHR178W   | 33.1438317 | 31.1961027 | 33.6523008 | 30.5103793 | 29.1250191 | 32.3446889 | -0.090897405 | 4.99027357 | 0.37656392  | STB5      |
| YDR037W   | 955.055294 | 1008.57806 | 882.222906 | 948.77819  | 865.149896 | 858.070379 | -0.090924398 | 9.84514541 | 0.345364899 | KRS1      |
| YOR307C   | 100.089111 | 89.1563896 | 97.0227304 | 84.6130867 | 92.7830586 | 91.352764  | -0.090997087 | 6.53316891 | 0.292639344 | SLY41     |
| YGR143W   | 149.87062  | 139.691774 | 140.661775 | 129.669112 | 137.806298 | 136.415824 | -0.091058818 | 7.12034852 | 0.273390557 | SKN1      |
| YEL064C   | 38.6020421 | 34.5919885 | 41.3390673 | 37.7240736 | 34.4027071 | 35.3144607 | -0.091094138 | 5.21418527 | 0.38021999  | AVT2      |
| YOL076W   | 95.4200393 | 117.704853 | 100.593748 | 106.549813 | 100.015446 | 87.9956306 | -0.091114233 | 6.66579442 | 0.374664478 | MDM20     |
| YGR262C   | 45.7700533 | 50.0749251 | 44.0627247 | 41.7448213 | 43.2640105 | 46.418825  | -0.091118459 | 5.5030575  | 0.343612973 | BUD32     |
| YBL102W   | 83.977526  | 71.3136002 | 78.3202827 | 71.4865282 | 72.6496561 | 75.0835792 | -0.091126458 | 6.24000196 | 0.302426495 | SFT2      |
| YER107W-A | 9.14085835 | 11.6265918 | 9.62358961 | 7.92323803 | 10.0992796 | 10.5878822 | -0.091245654 | 3.31614604 | 0.628620584 | YER107W-A |
| YER025W   | 490.778603 | 566.710014 | 498.671414 | 498.336195 | 467.955005 | 494.531571 | -0.091264877 | 8.97433572 | 0.335547395 | GCD11     |
| YML031W   | 189.65637  | 155.692727 | 178.550876 | 150.600651 | 162.305196 | 178.767352 | -0.091471889 | 7.40398921 | 0.36781661  | NDC1      |
| YGL249W   | 10.5218513 | 9.6696407  | 11.3183098 | 8.45539581 | 9.64318305 | 11.4917258 | -0.091859892 | 3.36418739 | 0.601117693 | ZIP2      |
| YDR317W   | 13.7441683 | 13.5835429 | 13.6788129 | 12.3578862 | 11.4024124 | 14.7197387 | -0.091904148 | 3.74107991 | 0.539366954 | HIM1      |
| YNL309W   | 29.3954222 | 33.2106112 | 33.7733522 | 26.7261462 | 32.3176946 | 31.5054055 | -0.09201121  | 4.96716491 | 0.42831412  | STB1      |
| YGL233W   | 79.3084545 | 97.73244   | 85.0386377 | 80.2375672 | 82.7489357 | 83.0244908 | -0.092138066 | 6.40638465 | 0.323401378 | SEC15     |
| YCL005W-A | 19.5311865 | 20.0875274 | 17.4919333 | 19.0985514 | 17.3968235 | 17.0439079 | -0.092291627 | 4.21522272 | 0.470090527 | VMA9      |
| YBR044C   | 52.6092567 | 51.3987449 | 47.0284851 | 50.2593457 | 47.4991922 | 43.8364147 | -0.092311554 | 5.61181141 | 0.33087698  | TCM62     |
| YOR131C   | 26.4361515 | 31.7141192 | 22.6366196 | 27.0217894 | 23.3912346 | 25.3721811 | -0.092432527 | 4.71364306 | 0.496667823 | YOR131C   |
| YBR276C   | 149.081481 | 157.477006 | 149.377479 | 132.329901 | 146.146349 | 149.263315 | -0.092473026 | 7.20361962 | 0.284745211 | PPS1      |
| YOR069C   | 128.629633 | 126.396018 | 124.864562 | 124.170148 | 115.066663 | 116.983186 | -0.092512283 | 6.94034785 | 0.256233784 | MEF1      |
| YOR270C   | 1413.08463 | 1109.07325 | 1298.76092 | 1210.95459 | 1197.83971 | 1174.54476 | -0.092564719 | 10.2693029 | 0.375586348 | VPH1      |
| YJR129C   | 20.3203254 | 18.533478  | 19.6708593 | 17.4429494 | 19.2863661 | 18.1414323 | -0.092812543 | 4.24912866 | 0.457099831 | EFM3      |
| YBL063W   | 50.3733633 | 53.4132534 | 54.0494687 | 47.3029136 | 47.8249754 | 52.939411  | -0.092906169 | 5.67559252 | 0.313433168 | KIP1      |
| YDR121W   | 11.4425133 | 13.007969  | 11.0156812 | 11.4709566 | 11.3372558 | 10.4587617 | -0.093030184 | 3.53476528 | 0.540779424 | DPB4      |
| YER100W   | 49.3211781 | 53.1830239 | 47.7547937 | 48.0124573 | 46.0005894 | 46.8707468 | -0.093138406 | 5.6046034  | 0.30369252  | UBC6      |
| YNL058C   | 52.2146873 | 49.7295808 | 50.2363483 | 43.8734524 | 47.173409  | 51.6482058 | -0.09317897  | 5.62238756 | 0.32525379  | YNL058C   |
| YPR072W   | 81.8073942 | 92.5522753 | 79.6518486 | 82.3070697 | 77.7970309 | 78.053351  | -0.093206014 | 6.3605072  | 0.291334495 | NOT5      |
| YML073C   | 803.474873 | 943.538215 | 790.405388 | 899.58316  | 778.817345 | 699.639508 | -0.093576191 | 9.67842105 | 0.411427878 | RPL6A     |
| YJR054W   | 59.7772679 | 68.8386326 | 61.9178124 | 55.5217948 | 63.7231961 | 59.4599969 | -0.093659922 | 5.94649747 | 0.32090227  | KCH1      |
| YIL097W   | 12.6262216 | 15.4829366 | 11.6814641 | 13.1856872 | 11.467569  | 12.6538104 | -0.093679538 | 3.69939646 | 0.562040448 | FYV10     |
| YHR036W   | 31.8286003 | 34.7646606 | 33.5312493 | 31.1016657 | 30.9494051 | 31.8282068 | -0.093700127 | 5.02088344 | 0.352183898 | BRL1      |
| YOR086C   | 747.24873  | 613.791955 | 753.908378 | 628.30095  | 670.266379 | 683.305763 | -0.09372126  | 9.41555212 | 0.36432471  | IST2      |
| YDL026W   | 2.89350912 | 3.28077095 | 2.66313171 | 2.83817482 | 2.73657898 | 2.71153081 | -0.093917274 | 1.57637986 | 0.712806655 | YDL026W   |
| YPL230W   | 10.0615203 | 10.3027719 | 12.1656699 | 9.87448322 | 9.38255649 | 11.2334848 | -0.094158985 | 3.41016419 | 0.569141838 | USV1      |
| YOR305W   | 19.7942328 | 23.8287574 | 20.3366422 | 17.7385926 | 19.481836  | 22.7897708 | -0.094248207 | 4.37785924 | 0.499357926 | RRG7      |
| YOR313C   | 11.5740365 | 15.2527071 | 12.0446184 | 11.884857  | 12.9661718 | 11.6208463 | -0.09450733  | 3.66627898 | 0.56587743  | SPS4      |
| YEL030W   | 16.5719159 | 16.6916417 | 15.3735331 | 14.1908741 | 14.7905578 | 16.5919861 | -0.094606179 | 3.98394726 | 0.493475058 | ECM10     |
| YNL148C   | 22.5562188 | 16.5765269 | 17.7945619 | 19.3350659 | 17.5922934 | 16.2691848 | -0.094701964 | 4.20685361 | 0.524509042 | ALF1      |
| YLR048W   | 2557.53325 | 1885.46482 | 2194.90474 | 2176.58444 | 1960.3679  | 2079.03396 | -0.09470772  | 11.065026  | 0.410157304 | RPS0B     |
| YGR221C   | 47.9401852 | 53.0679091 | 49.9942454 | 42.5134936 | 48.8023251 | 50.2278802 | -0.094723891 | 5.61124366 | 0.336240194 | TOS2      |
| YFR014C   | 46.427669  | 45.2401047 | 41.8837988 | 43.5186805 | 42.4821308 | 38.9943954 | -0.094806589 | 5.43358518 | 0.318994453 | CMK1      |
| YPR114W   | 156.315254 | 132.95756  | 163.237869 | 127.481352 | 144.256806 | 151.974846 | -0.094874074 | 7.19123401 | 0.349895374 | YPR114W   |
| YBR003W   | 103.771759 | 97.2144235 | 101.017428 | 92.5954534 | 93.5649383 | 96.5821449 | -0.094899056 | 6.60848046 | 0.24135838  | COQ1      |
| YJL126W   | 14.401784  | 21.4113473 | 17.1893047 | 15.7873474 | 18.569643  | 15.3653412 | -0.094944998 | 4.10988651 | 0.56794982  | NIT2      |
| YNL121C   | 299.74124  | 300.737337 | 282.473539 | 309.420184 | 262.320642 | 254.754775 | -0.095144929 | 8.15506292 | 0.335339769 | TOM70     |
| YLR093C   | 37.2868107 | 50.9958432 | 38.2522555 | 39.5570615 | 40.9183713 | 38.0905518 | -0.095162685 | 5.35752243 | 0.441355523 | NYV1      |
| YPR171W   | 65.8273324 | 65.0398452 | 72.6913907 | 59.6607998 | 65.938522  | 65.0121791 | -0.095304599 | 6.04037007 | 0.287455541 | BSP1      |
| YER120W   | 402.986906 | 349.891344 | 380.76731  | 372.569573 | 352.301965 | 336.100699 | -0.095405438 | 8.51526851 | 0.31135221  | SCS2      |
| YOR254C   | 339.395467 | 343.675147 | 348.386049 | 325.562303 | 320.17974  | 319.702394 | -0.095414623 | 8.37914791 | 0.268653984 | SEC63     |
| YDR246W   | 19.3339018 | 21.9293637 | 20.2761165 | 17.0290489 | 18.9605829 | 21.6922464 | -0.095515956 | 4.32160555 | 0.482552288 | TRS23     |
| YOR073W   | 38.0759495 | 38.9087924 | 36.5575354 | 38.3744887 | 31.0797184 | 36.7347864 | -0.095778512 | 5.20000646 | 0.369026262 | SGO1      |
| YPL040C   | 43.9287293 | 47.7150723 | 45.8784964 | 39.4388042 | 43.720107  | 45.6441019 | -0.095784312 | 5.47614936 | 0.325393246 | ISM1      |
| YAL047C   | 17.8213857 | 19.6846257 | 19.1866535 | 16.0829906 | 18.8954263 | 18.1414323 | -0.096011626 | 4.20376187 | 0.468437965 | SPC72     |
| YOL114C   | 3.02503226 | 3.28077095 | 3.02628604 | 2.83817482 | 3.25783211 | 2.64697055 | -0.096155853 | 1.6498883  | 0.689163334 | YOL114C   |
| YOR058C   | 54.713627  | 54.391729  | 52.4757999 | 50.4367316 | 48.9326383 | 51.7773263 | -0.096167487 | 5.70729482 | 0.267868148 | ASE1      |
| YNL158W   | 16.1115849 | 16.7011172 | 16.2208932 | 12.2987575 | 15.3230641 | 18.7224746 | -0.096233213 | 4.02310593 | 0.566638503 | PGA1      |
| YPL247C   | 45.7042918 | 44.4918587 | 48.7232052 | 40.2074766 | 45.8051195 | 43.9655352 | -0.096607981 | 5.48976247 | 0.312400761 | YPL247C   |
| YKR021W   | 68.2605106 | 71.0258133 | 69.7256304 | 60.4294721 | 64.8308591 | 70.3061202 | -0.096638604 | 6.07794328 | 0.276121655 | ALY1      |
| YGR180C   | 603.362413 | 704.041935 | 607.678237 | 669.690999 | 576.962067 | 544.242969 | -0.096711461 | 9.27103543 | 0.367825036 | RNR4      |
| YNL238W   | 243.580858 | 205.652537 | 234.476642 | 220.195063 | 211.433304 | 207.625787 | -0.096712048 | 7.78536265 | 0.305547736 | KEX2      |
| YHR127W   | 21.2409874 | 22.4473802 | 21.4261052 | 20.8724106 | 20.8501255 | 19.1743964 | -0.096734223 | 4.401482   | 0.409379273 | YHR127W   |

|           |            |            |            |            |            |            |              |            |             |           |
|-----------|------------|------------|------------|------------|------------|------------|--------------|------------|-------------|-----------|
| YBR192W   | 36.4976718 | 43.6860553 | 38.6759356 | 36.009343  | 35.1194302 | 40.0919198 | -0.097095526 | 5.26620269 | 0.367064641 | RIM2      |
| YHR158C   | 160.32671  | 136.641232 | 160.211583 | 142.913928 | 143.279456 | 141.128722 | -0.097107425 | 7.20488851 | 0.279973545 | KEL1      |
| YCR089W   | 148.555389 | 120.985624 | 146.593296 | 104.184667 | 140.347407 | 144.550416 | -0.097107731 | 7.06924016 | 0.432082254 | FIG2      |
| YBR156C   | 30.3818457 | 29.6996107 | 28.6891917 | 27.1991753 | 28.6689226 | 27.1153081 | -0.097214346 | 4.84540992 | 0.349707914 | SLI15     |
| YDR292C   | 118.107781 | 142.684758 | 138.301272 | 121.331973 | 124.97044  | 126.925466 | -0.097232987 | 7.00967583 | 0.291272583 | SRP101    |
| YPR180W   | 26.6334362 | 31.080988  | 26.1471114 | 28.3226195 | 26.1929702 | 23.8872952 | -0.097249034 | 4.76488408 | 0.419563167 | AOS1      |
| YOL119C   | 66.4849481 | 55.888221  | 67.2440758 | 59.7199284 | 54.6012662 | 62.8171303 | -0.097410083 | 5.93647278 | 0.325688155 | MCH4      |
| YGR070W   | 48.6635624 | 52.0318762 | 47.9968966 | 47.1255277 | 49.5842048 | 42.2869685 | -0.097547143 | 5.5873833  | 0.309224383 | ROM1      |
| YNL307C   | 355.770098 | 276.505678 | 334.707236 | 316.98865  | 291.054721 | 295.492297 | -0.097664852 | 8.2847822  | 0.353426639 | MCK1      |
| YGR001C   | 88.6465975 | 116.43859  | 92.4833014 | 95.6110141 | 92.5875887 | 89.9969986 | -0.097670126 | 6.58665527 | 0.351044266 | EFM5      |
| YGL071W   | 79.5715007 | 89.4441765 | 93.1490843 | 74.9159894 | 81.4458028 | 88.7703537 | -0.097777773 | 6.40393132 | 0.304431089 | AFT1      |
| YGR014W   | 615.39678  | 514.045007 | 623.05177  | 466.465857 | 575.463464 | 595.697494 | -0.097822096 | 9.14240602 | 0.396552451 | MSB2      |
| YDL004W   | 100.549442 | 117.99264  | 95.9937932 | 100.57782  | 95.5196376 | 97.87335   | -0.097852705 | 6.66618689 | 0.2961734   | ATP16     |
| YGR267C   | 81.3470632 | 88.8110453 | 81.0439401 | 75.980305  | 80.2729833 | 78.5698331 | -0.097857975 | 6.3422463  | 0.243933817 | FOL2      |
| YNL040W   | 48.0717083 | 50.9382859 | 46.5442793 | 48.0124573 | 45.4141797 | 42.5452095 | -0.09800536  | 5.55634651 | 0.293894963 | YNL040W   |
| YLR162W   | 5.45821038 | 2.47496756 | 4.11574901 | 4.19813358 | 2.67142233 | 4.32553724 | -0.098127385 | 1.99383537 | 0.752333997 | YLR162W   |
| YMR277W   | 154.47393  | 132.324428 | 155.127422 | 138.715794 | 140.347407 | 133.704293 | -0.098137891 | 7.15547865 | 0.27641911  | FCP1      |
| YCR100C   | 11.0479439 | 11.799264  | 10.7130526 | 11.2935706 | 10.1644362 | 9.87771936 | -0.098195911 | 3.45290014 | 0.516431012 | YCR100C   |
| YLR228C   | 49.9130323 | 49.0388921 | 47.3311137 | 41.626564  | 48.085602  | 46.9998673 | -0.098278939 | 5.56322059 | 0.298561969 | ECM22     |
| YLR351C   | 117.187119 | 141.591167 | 117.783053 | 119.794629 | 115.131787 | 116.918626 | -0.098301565 | 6.92535481 | 0.294222982 | NIT3      |
| YNR030W   | 215.106098 | 166.455958 | 195.982284 | 168.398372 | 176.053247 | 194.971977 | -0.09830893  | 7.54118055 | 0.359362363 | ALG12     |
| YDR381W   | 219.117554 | 262.634348 | 243.010769 | 226.758342 | 221.271957 | 229.059793 | -0.098376506 | 7.8690443  | 0.298753223 | YRA1      |
| YAL058W   | 54.9766732 | 56.8666965 | 56.1073432 | 49.3724161 | 50.822181  | 56.7484661 | -0.098433929 | 5.76217691 | 0.282564574 | CNE1      |
| YGR257C   | 63.2626312 | 65.15496   | 62.1599153 | 57.650426  | 61.1820871 | 59.2017559 | -0.098640937 | 5.94394826 | 0.239894523 | MTM1      |
| YLL036C   | 58.2647518 | 56.7515817 | 57.7415376 | 52.3879768 | 54.275484  | 54.6825379 | -0.098662255 | 5.80235918 | 0.244297958 | PRP19     |
| YHL031C   | 25.0551585 | 31.1385454 | 29.7181289 | 29.0321632 | 25.0201506 | 26.2114644 | -0.098702838 | 4.79940149 | 0.416937438 | GOS1      |
| YDR004W   | 46.2303843 | 44.3767439 | 44.1837762 | 43.1639087 | 44.0458902 | 38.6070338 | -0.098833858 | 5.4449441  | 0.296320113 | RAD57     |
| YHR109W   | 20.7806564 | 19.3968388 | 20.9418994 | 19.2168087 | 19.4166794 | 18.3996733 | -0.099092666 | 4.30855054 | 0.410560063 | CTM1      |
| YJR096W   | 24.0687349 | 30.2176272 | 26.1471114 | 26.6078889 | 24.6943674 | 23.8227349 | -0.099413106 | 4.70452989 | 0.41721465  | YJR096W   |
| YGL256W   | 109.953346 | 93.5307509 | 101.199005 | 93.4232544 | 94.8680711 | 96.0011026 | -0.099415584 | 6.618751   | 0.253347441 | ADH4      |
| YPR124W   | 74.3763367 | 68.7235179 | 59.3152064 | 67.05188   | 66.9158716 | 54.8762187 | -0.099421727 | 6.02974996 | 0.35997049  | CTR1      |
| YOR183W   | 0.32880785 | 0.4029017  | 0.54473149 | 0.35477185 | 0.65156642 | 0.19368077 | -0.099426147 | -0.8973048 | 0.887198181 | FVY12     |
| YBR284W   | 7.95715007 | 8.97895208 | 8.41307519 | 6.97717976 | 9.05677327 | 7.68267061 | -0.099502243 | 3.05334427 | 0.571634322 | YBR284W   |
| YDR400W   | 57.6728976 | 50.8231711 | 51.6284398 | 45.7064403 | 53.4936033 | 50.2278802 | -0.099675362 | 5.6920866  | 0.308873156 | URH1      |
| YOR298W   | 14.6648303 | 12.6050673 | 13.8603901 | 12.5352721 | 13.0964851 | 12.7183707 | -0.099677817 | 3.74018853 | 0.473751458 | MUM3      |
| YNL042W   | 18.084432  | 19.6270683 | 21.4866309 | 17.2064348 | 21.306222  | 16.7856669 | -0.099842476 | 4.26371856 | 0.480385565 | BOP3      |
| YGL215W   | 303.160842 | 257.857085 | 313.160079 | 214.341327 | 280.955441 | 320.412557 | -0.099960739 | 8.13822218 | 0.450865454 | CLG1      |
| YPL228W   | 45.3097223 | 51.7440892 | 49.5705653 | 45.8838262 | 46.6521559 | 44.3528967 | -0.099973932 | 5.56650825 | 0.282813469 | CET1      |
| YBR135W   | 36.4976718 | 32.2896931 | 33.4707236 | 30.5103793 | 33.4253575 | 31.4408453 | -0.09998358  | 5.04669247 | 0.336253455 | CKS1      |
| YLR150W   | 1266.69938 | 1382.06793 | 1207.30655 | 1437.41729 | 1142.32625 | 1017.66334 | -0.100144374 | 10.2789175 | 0.416683088 | STM1      |
| YNL016W   | 408.18207  | 429.493208 | 406.006535 | 367.425381 | 371.848957 | 421.061998 | -0.100156309 | 8.64672478 | 0.284222636 | PUB1      |
| YOR047C   | 70.5621655 | 72.0618462 | 73.4176993 | 66.401465  | 69.7176072 | 65.4641009 | -0.1001959   | 6.12374577 | 0.226442724 | STD1      |
| YFL044C   | 34.9851557 | 35.7431362 | 35.8312267 | 34.5311269 | 31.0145617 | 33.8295748 | -0.100317165 | 5.10666349 | 0.313854108 | OTU1      |
| YCL001W   | 78.0589846 | 80.5227818 | 87.9438723 | 70.6587222 | 75.9074882 | 83.4764126 | -0.100456932 | 6.3138164  | 0.276306264 | RER1      |
| YML111W   | 119.225728 | 122.309443 | 122.62511  | 110.747946 | 113.893811 | 115.046378 | -0.100570382 | 6.87572375 | 0.208260523 | BUL2      |
| YLL025W   | 1.70980084 | 2.35985279 | 2.17892595 | 1.71473062 | 1.88954263 | 2.259609   | -0.100597473 | 1.10201172 | 0.737284842 | PAU17     |
| YGL120C   | 347.221094 | 330.782292 | 340.820334 | 301.201302 | 322.004126 | 326.933143 | -0.100717562 | 8.35877495 | 0.25586414  | PRP43     |
| YJL185C   | 19.1366171 | 14.9073628 | 20.3366422 | 15.6099615 | 16.2240039 | 18.8515951 | -0.10080257  | 4.13910386 | 0.51264779  | ATG36     |
| YAL021C   | 153.816314 | 139.403987 | 164.387858 | 127.244838 | 150.77247  | 148.746833 | -0.10083077  | 7.2046175  | 0.30146181  | CCR4      |
| YKL119C   | 16.6376774 | 25.0950199 | 20.155065  | 16.6328669 | 18.3741731 | 19.2389567 | -0.101047621 | 4.32915978 | 0.516985858 | VPH2      |
| YPL266W   | 50.9652174 | 67.3421406 | 56.1678689 | 52.9201346 | 57.3378452 | 52.5520494 | -0.101111903 | 5.81659223 | 0.352413935 | DIM1      |
| YPL257W   | 5.58973352 | 5.4103942  | 5.8104692  | 4.90767729 | 6.05956773 | 4.71289878 | -0.101512362 | 2.46889894 | 0.614275364 | YPL257W   |
| YHR193C   | 317.562626 | 415.679435 | 317.094251 | 403.671239 | 311.05781  | 264.180573 | -0.101568697 | 8.40251578 | 0.488267789 | EGD2      |
| YGR264C   | 587.77692  | 655.521059 | 621.296524 | 569.94098  | 587.843226 | 579.75111  | -0.101889906 | 9.2299967  | 0.262171128 | MES1      |
| YPL223C   | 3.6168864  | 3.39588572 | 3.14733748 | 2.48340296 | 3.77908525 | 3.22801286 | -0.101965739 | 1.76141732 | 0.690208064 | GRE1      |
| YOL029C   | 15.2566844 | 16.2311826 | 16.1603675 | 11.5300852 | 16.825534  | 16.9147874 | -0.102063145 | 3.95111792 | 0.536714266 | YOL029C   |
| YGR132C   | 88.3177897 | 114.424082 | 93.3306615 | 97.5622593 | 96.171204  | 82.1852075 | -0.102101916 | 6.57721088 | 0.349497741 | PHB1      |
| YCR053W   | 876.733263 | 725.625954 | 894.146473 | 730.238729 | 797.256675 | 797.96478  | -0.102370444 | 9.65063424 | 0.326043418 | THR4      |
| YDL209C   | 31.4340309 | 27.5699875 | 28.6891917 | 25.2479301 | 27.7567296 | 28.6647542 | -0.102391858 | 4.82466004 | 0.359193333 | CWC2      |
| YBL009W   | 75.4942834 | 73.673453  | 67.6677558 | 65.1597635 | 64.3747626 | 72.4366086 | -0.10242333  | 6.12767917 | 0.253135948 | ALK2      |
| YDR407W   | 38.470519  | 47.6575149 | 41.3390673 | 46.8298845 | 37.334756  | 34.5397376 | -0.102490628 | 5.36418456 | 0.416665616 | YLR407W   |
| YPL063W   | 193.733588 | 204.213602 | 205.545348 | 187.851696 | 185.761587 | 188.515951 | -0.102527739 | 7.60290763 | 0.234639269 | TIM50     |
| YFR036W   | 3.87993268 | 5.52550897 | 3.57101753 | 4.13900494 | 4.23518175 | 3.74449492 | -0.102546366 | 2.11069056 | 0.651035747 | CDC26     |
| YMR066W   | 31.6970772 | 36.606497  | 33.8338779 | 29.9782215 | 33.2950442 | 31.9573273 | -0.102661966 | 5.04554975 | 0.337220688 | SOV1      |
| YIL018W   | 3964.69935 | 3096.01175 | 3708.04776 | 3230.49336 | 3307.22085 | 3490.77311 | -0.102735352 | 11.759185  | 0.338156408 | RPL2B     |
| YCR102C   | 6.11582609 | 5.98596805 | 5.68941775 | 4.78942    | 5.53831459 | 6.26234495 | -0.10288142  | 2.54800864 | 0.587582725 | YCR102C   |
| YLR135W   | 145.596118 | 187.867305 | 149.014325 | 166.210613 | 147.384325 | 135.705661 | -0.10289023  | 7.28036526 | 0.361275541 | PRE9      |
| YER145C-A | 16.7692006 | 19.281724  | 16.5840475 | 19.3350659 | 14.8557144 | 14.7842989 | -0.10290337  | 4.09457548 | 0.492075772 | YER145C-A |
| YER070W   | 859.43797  | 825.085116 | 919.264647 | 740.054083 | 840.650998 | 843.802562 | -0.102953436 | 9.71109024 | 0.289776948 | RNR1      |
| YLR038C   | 7.8913885  | 11.7417066 | 6.71835501 | 10.6431556 | 7.49301386 | 6.39146547 | -0.103053131 | 3.1112139  | 0.687546583 | COX12     |
| YOR211C   | 115.148511 | 105.790474 | 111.791006 | 106.135912 | 106.009857 | 97.5505487 | -0.103074505 | 6.74408279 | 0.219346922 | MGM1      |
| YGL004C   | 23.4768808 | 26.8792989 | 23.9076597 | 22.7645272 | 22.4138849 | 24.0164157 | -0.103174559 | 4.58762504 | 0.376393193 | RPN14     |
| YDR118W   | 25.1866816 | 26.7066267 | 26.5707914 | 27.9678477 | 24.042801  | 20.9820836 | -0.103241409 | 4.665993   | 0.412678483 | APC4      |

|           |            |            |            |            |            |             |              |            |             |           |
|-----------|------------|------------|------------|------------|------------|-------------|--------------|------------|-------------|-----------|
| YFL003C   | 6.24734923 | 7.30978791 | 6.89993217 | 4.90767729 | 6.7762908  | 7.42442959  | -0.103489076 | 2.74725962 | 0.626443921 | MSH4      |
| YOR017W   | 50.1760786 | 51.2260728 | 49.5705653 | 47.3620423 | 45.8051195 | 47.3226686  | -0.103788457 | 5.60605328 | 0.232701879 | PET127    |
| YAL028W   | 23.9372118 | 22.274708  | 23.4839797 | 23.7697141 | 21.0455955 | 19.9491195  | -0.10403112  | 4.49446261 | 0.383518597 | FRT2      |
| YPL215W   | 50.2418401 | 59.6870084 | 49.0258338 | 49.2541588 | 50.4312411 | 48.2910724  | -0.104100368 | 5.68072644 | 0.297707953 | CBP3      |
| YIL031W   | 72.9953437 | 82.6524051 | 77.2913455 | 72.6099724 | 73.1057526 | 71.0808432  | -0.104187    | 6.2306183  | 0.220578156 | ULP2      |
| YKL190W   | 43.1395905 | 45.1825473 | 41.399593  | 41.7448213 | 37.8560092 | 41.0603236  | -0.104253611 | 5.38765274 | 0.273788044 | CNB1      |
| YJL025W   | 39.8515119 | 39.5419236 | 41.2180159 | 33.9989692 | 36.2270931 | 42.0287275  | -0.104343614 | 5.28280838 | 0.322775786 | RRN7      |
| YPL032C   | 268.109924 | 250.604855 | 277.328853 | 206.83199  | 261.408449 | 272.315165  | -0.1043951   | 8.00115293 | 0.343732309 | SVL3      |
| YNL300W   | 42.6134979 | 38.851235  | 44.4258791 | 27.1400467 | 37.5953826 | 52.4229289  | -0.104446447 | 5.34347247 | 0.555047997 | TOS6      |
| YFR001W   | 19.5311865 | 23.7712001 | 19.2471792 | 25.4253161 | 18.8302696 | 13.8804553  | -0.104529902 | 4.34182336 | 0.578685912 | LOC1      |
| YDL052C   | 189.130278 | 143.087659 | 155.672154 | 149.122435 | 147.644951 | 156.881425  | -0.104542412 | 7.29484384 | 0.316110015 | SLC1      |
| YPL210C   | 119.751821 | 137.159249 | 135.456563 | 118.020769 | 122.624801 | 124.407616  | -0.104614632 | 6.9815457  | 0.229647605 | SRP72     |
| YDR500C   | 482.295361 | 474.618198 | 450.674517 | 427.795275 | 432.509791 | 448.758348  | -0.104687404 | 8.82304379 | 0.237667156 | RPL37B    |
| YNL298W   | 75.8888528 | 83.2855363 | 85.0386377 | 71.9595573 | 77.4712477 | 77.79511    | -0.104816197 | 6.29835842 | 0.224919569 | CLA4      |
| YFR009W   | 255.023372 | 273.915596 | 236.837145 | 241.540503 | 235.476105 | 234.999336  | -0.105045607 | 7.94505133 | 0.251336218 | GCN20     |
| YFL034C-B | 40.1803198 | 52.3772205 | 38.6759356 | 36.5415008 | 42.7427573 | 42.8680108  | -0.105086161 | 5.40486045 | 0.401698811 | MOB2      |
| YCR020C   | 4.34026368 | 5.00749251 | 4.17627473 | 3.72510445 | 4.75643489 | 4.13185646  | -0.105136593 | 2.16370231 | 0.630992998 | PET18     |
| YOR320C   | 92.0004376 | 105.905589 | 95.812216  | 95.3744996 | 87.3750573 | 90.3197999  | -0.105385395 | 6.56390008 | 0.230621058 | GNT1      |
| YKL069W   | 21.7013184 | 28.4333483 | 21.244528  | 21.463697  | 23.6518611 | 21.3048849  | -0.105765507 | 4.53027498 | 0.446880895 | YKL069W   |
| YDR100W   | 51.6885947 | 45.3552195 | 50.1758225 | 43.6960664 | 46.4566859 | 46.6125057  | -0.105848858 | 5.56816739 | 0.256927234 | TVP15     |
| YMR081C   | 7.69410379 | 8.00047653 | 8.65517807 | 7.21369433 | 7.81879707 | 7.61811036  | -0.10591601  | 2.99258466 | 0.516014017 | ISF1      |
| YDL167C   | 106.467983 | 134.166265 | 119.719876 | 97.444002  | 112.395208 | 125.182339  | -0.105940779 | 6.85834761 | 0.335706698 | NRP1      |
| YLL032C   | 40.3118429 | 40.347727  | 36.1338553 | 35.8910857 | 34.5330204 | 38.0905518  | -0.105946973 | 5.23560644 | 0.288040336 | YLL032C   |
| YOR324C   | 66.5507097 | 55.8306636 | 65.3677785 | 54.3983506 | 60.3350507 | 59.6536777  | -0.106199556 | 5.91800567 | 0.270651827 | FRT1      |
| YBR159W   | 302.24018  | 280.764925 | 302.26545  | 274.593413 | 284.86484  | 262.760247  | -0.106520796 | 8.15331439 | 0.233769686 | IFA38     |
| YGR033C   | 44.9809145 | 54.5068437 | 46.6653307 | 46.9481418 | 45.4141797 | 43.4490531  | -0.106611625 | 5.55884722 | 0.289516088 | TIM21     |
| YDR197W   | 26.8964825 | 38.9663497 | 31.2917977 | 34.1763551 | 27.7567296 | 28.3419529  | -0.1066218   | 4.97287798 | 0.451262494 | CBS2      |
| YGL223C   | 41.6270744 | 56.0033357 | 44.5469305 | 40.5031198 | 44.1762035 | 47.5163493  | -0.106679121 | 5.51949073 | 0.371889326 | COG1      |
| YGR261C   | 133.232943 | 144.699266 | 133.822369 | 123.697119 | 130.769381 | 128.02299   | -0.106715215 | 7.04989933 | 0.200618456 | APL6      |
| YLR082C   | 21.0437027 | 21.6991342 | 21.4866309 | 20.6358961 | 20.7849689 | 18.2059925  | -0.107091394 | 4.37672027 | 0.371348846 | SRL2      |
| YLO26C-A  | 2.56470126 | 1.95695109 | 1.69472018 | 1.24170148 | 2.01985591 | 1.215785003 | -0.107247343 | 1.0771504  | 0.761945447 | FRM2      |
| YCL086W-A | 4.53754839 | 4.31680389 | 3.93417185 | 4.25726222 | 3.64877197 | 3.93817569  | -0.107269437 | 2.08128784 | 0.606288452 | MHF1      |
| YHR029C   | 24.2660196 | 33.2106112 | 24.4523912 | 23.8879714 | 26.1278135 | 26.1469042  | -0.107373969 | 4.72742746 | 0.438823102 | YHI9      |
| YJL001W   | 98.5108332 | 119.776918 | 100.170068 | 96.3205578 | 103.142965 | 96.2593436  | -0.107503787 | 6.67952977 | 0.256407808 | PRE3      |
| YOR004W   | 26.1073436 | 34.9373328 | 30.6865404 | 29.6234496 | 29.1250191 | 26.4697055  | -0.107617132 | 4.88959804 | 0.387916722 | UTP23     |
| YLR363C   | 23.3453577 | 26.7066267 | 24.270814  | 26.9035321 | 22.5441982 | 19.4971977  | -0.107624892 | 4.58664194 | 0.426339376 | NMD4      |
| YBR219C   | 6.24734923 | 5.92841067 | 8.83675524 | 6.09025013 | 6.64597751 | 6.77882701  | -0.107702545 | 2.78192986 | 0.606407006 | YOR219C   |
| YOR072W   | 0.92066199 | 0.86336078 | 0.66578293 | 0.53215778 | 0.97734963 | 0.77472309  | -0.107938815 | -0.1375824 | 0.921002513 | YOR072W   |
| YNL038W   | 20.5833717 | 26.7066267 | 19.5498078 | 20.5176388 | 20.7198122 | 20.8529631  | -0.107984632 | 4.4349874  | 0.439098496 | GPI15     |
| YDR395W   | 280.736146 | 278.289957 | 264.557926 | 254.548804 | 257.30358  | 252.301485  | -0.108027994 | 8.04848045 | 0.215150534 | SXM1      |
| YDR196C   | 27.1595288 | 29.1240369 | 23.7260826 | 26.6670175 | 23.9124877 | 23.6290542  | -0.10804702  | 4.69153133 | 0.370358252 | CAB5      |
| YDR430C   | 111.531624 | 108.668343 | 113.364675 | 100.282177 | 101.839832 | 107.363708  | -0.108150363 | 6.7454819  | 0.18291648  | CYM1      |
| YKL206C   | 19.8599944 | 26.2461676 | 23.7260826 | 18.7437795 | 22.6093549 | 23.5644939  | -0.10817212  | 4.49776081 | 0.447228604 | ADD66     |
| YBR246W   | 82.5307714 | 82.7675198 | 86.067575  | 78.7593512 | 79.0350071 | 75.4063805  | -0.108175415 | 6.33789972 | 0.180524554 | RR22      |
| YNR017W   | 109.756062 | 105.387572 | 110.156812 | 97.444002  | 101.253422 | 103.102731  | -0.108208596 | 6.70926348 | 0.178085734 | TIM23     |
| YMR150C   | 25.0551585 | 31.829234  | 27.539203  | 26.9626608 | 24.6292108 | 26.7925068  | -0.108289491 | 4.7698365  | 0.373026075 | IMP1      |
| YDL035C   | 141.781947 | 126.453575 | 136.969706 | 126.949194 | 123.40668  | 125.44058   | -0.108312843 | 7.0255476  | 0.19508779  | GPR1      |
| YMR052C-A | 1.70980084 | 1.78427894 | 1.51314302 | 1.71473062 | 1.6940727  | 1.22664489  | -0.108404378 | 0.79404846 | 0.745368977 | YMR052C-A |
| YEL030C-A | 0          | 0.17267216 | 0.42368005 | 0.35477185 | 0.06515664 | 0.12912051  | -0.10845754  | -1.644419  | 1           | YEL030C-A |
| YCR063W   | 6.90496944 | 6.04352544 | 7.74729226 | 6.20850741 | 7.62332714 | 5.35850135  | -0.108572701 | 2.75852431 | 0.576137432 | BUD31     |
| YLR433C   | 66.0246172 | 74.9397155 | 74.3255851 | 71.0726277 | 65.2217989 | 63.3981726  | -0.108649433 | 6.11496943 | 0.233653579 | CNA1      |
| YHR167W   | 15.3882076 | 15.5980514 | 14.8893273 | 15.0186751 | 14.0086781 | 13.4930938  | -0.108701068 | 3.89374855 | 0.417383042 | THP2      |
| YMR126C   | 29.0666143 | 34.4768737 | 30.7470662 | 31.9885953 | 28.2779827 | 27.1798683  | -0.108851238 | 4.92776515 | 0.343209489 | DLT1      |
| YOR318C   | 1.24946985 | 0.97847555 | 1.63419446 | 1.47821605 | 0.91219299 | 1.16208463  | -0.109169154 | 0.44621875 | 0.766436289 | YOR318C   |
| YKR008W   | 69.575742  | 93.4156361 | 76.0203053 | 66.6379795 | 74.7998253 | 80.31296    | -0.10929266  | 6.26556091 | 0.336803485 | RSC4      |
| YOR373W   | 67.0110407 | 70.6229116 | 67.7888073 | 58.1825837 | 65.2217989 | 67.1426676  | -0.109322762 | 6.04696817 | 0.221144313 | NUD1      |
| YJR070C   | 238.911787 | 242.604378 | 226.608299 | 238.111041 | 217.883812 | 200.265918  | -0.109571119 | 7.82994566 | 0.246365691 | LIA1      |
| YIR017C   | 5.12940253 | 3.97145957 | 5.32626343 | 5.9128642  | 3.32298876 | 4.06729621  | -0.109634496 | 2.24932356 | 0.66695417  | MET28     |
| YML025C   | 41.5613128 | 45.0674326 | 41.0969644 | 35.4771852 | 40.5274315 | 42.4806493  | -0.109695273 | 5.36310901 | 0.288700355 | YML6      |
| YJR090C   | 113.504471 | 119.08623  | 115.059395 | 99.927405  | 116.109137 | 106.266183  | -0.109714922 | 6.80454653 | 0.205931333 | GRR1      |
| YNL154C   | 201.230407 | 190.687617 | 200.642764 | 173.365178 | 184.523611 | 191.292042  | -0.109726629 | 7.5729506  | 0.214835134 | YCK2      |
| YKL025C   | 90.5536831 | 92.8976196 | 99.4437593 | 82.3070697 | 89.0039733 | 90.9008422  | -0.110029198 | 6.50741239 | 0.198136983 | PAN3      |
| YLR279W   | 2.36741655 | 2.01450848 | 1.93682307 | 2.12863111 | 2.01985591 | 1.67856669  | -0.110253402 | 1.10280587 | 0.691569543 | YLR279W   |
| YGR193C   | 79.1769313 | 81.3861426 | 75.7782024 | 71.7230428 | 75.6468617 | 71.5973253  | -0.110393572 | 6.24814786 | 0.181702249 | PDX1      |
| YFL020C   | 3.74840954 | 3.16565618 | 3.93417185 | 3.72510445 | 2.60626569 | 3.67993466  | -0.11049051  | 1.84903269 | 0.647341341 | PAU5      |
| YJL192C   | 152.040752 | 156.613645 | 152.101136 | 147.348576 | 139.695841 | 139.708397  | -0.110523964 | 7.2099606  | 0.177510879 | SOP4      |
| YLR090W   | 54.6478654 | 55.600434  | 54.1705201 | 47.1846563 | 50.2357712 | 54.9407789  | -0.110546214 | 5.22970005 | 0.229744799 | XDJ1      |
| YOR008C   | 123.237184 | 129.21633  | 119.114619 | 110.215789 | 116.500076 | 117.499668  | -0.110620951 | 6.89994756 | 0.182020011 | SLG1      |
| YKL154W   | 36.3661487 | 43.1104815 | 36.860164  | 39.3796756 | 36.2270931 | 32.1510081  | -0.110638081 | 5.22870153 | 0.327335411 | SRP102    |
| YKL110C   | 37.4183338 | 46.333695  | 38.1312041 | 34.2354837 | 36.5528763 | 42.224083   | -0.110644895 | 5.29584604 | 0.35044929  | KTI12     |
| YOL116W   | 25.9100589 | 27.1095284 | 26.1471114 | 25.9574738 | 22.8048248 | 24.5328978  | -0.11066934  | 4.67503328 | 0.319998745 | MSN1      |
| YPR172W   | 32.2889313 | 34.7646606 | 30.9286433 | 31.3973089 | 30.3629953 | 28.9875555  | -0.110701264 | 4.9813921  | 0.287163218 | YPR172W   |
| YLR230W   | 31.565554  | 30.9658732 | 35.770701  | 25.3661874 | 32.057068  | 33.7004543  | -0.110725513 | 4.98565685 | 0.379290348 | YLR230W   |

|           |            |            |            |            |            |            |               |            |             |           |
|-----------|------------|------------|------------|------------|------------|------------|---------------|------------|-------------|-----------|
| YGL262W   | 0.19728471 | 0.17267216 | 0.24210288 | 0.29564321 | 0          | 0.25824103 | -0.110920683  | -1.6438283 | 1           | YGL262W   |
| Q0085     | 0.19728471 | 0          | 0.42368005 | 0.17738593 | 0.06515664 | 0.32280129 | -0.110951949  | -1.6432033 | 1           | ATP6      |
| YGR185C   | 518.793033 | 530.161075 | 501.879277 | 493.724161 | 467.759535 | 474.517891 | -0.110961149  | 8.95982384 | 0.209078759 | TYS1      |
| YBR261C   | 40.9036971 | 40.7506287 | 35.1049181 | 35.5363138 | 34.8588036 | 37.7031902 | -0.111066029  | 5.23267469 | 0.279359298 | TAE1      |
| YJL057C   | 36.2346255 | 40.2901696 | 34.1970322 | 34.7085129 | 32.9041043 | 34.9270992 | -0.111184963  | 5.15701247 | 0.281018295 | IKS1      |
| YLR029C   | 1192.06    | 1576.32411 | 1177.10422 | 1353.04072 | 1205.78882 | 1093.97356 | -0.1112127    | 10.3066831 | 0.377042743 | RPL15A    |
| YMR309C   | 537.798127 | 545.874241 | 544.97359  | 477.759427 | 501.250049 | 528.813067 | -0.11125891   | 9.03030464 | 0.214661932 | NIP1      |
| YHR203C   | 1286.29633 | 1352.65611 | 1220.13801 | 1211.36849 | 1148.77676 | 1212.37707 | -0.1111318922 | 10.2746524 | 0.229347072 | RPS4B     |
| YLR437C   | 35.1824404 | 27.2822006 | 29.3549746 | 32.698139  | 26.1929702 | 25.9532234 | -0.111320991  | 4.88588348 | 0.394373596 | DIF1      |
| YHL042W   | 2.17013184 | 1.89939371 | 1.51314302 | 1.71473062 | 1.88954263 | 1.54944617 | -0.111386881  | 0.93411428 | 0.715657874 | YHL042W   |
| YBL057C   | 34.5905863 | 43.2255962 | 34.8628152 | 37.0736585 | 35.70584   | 31.5699658 | -0.111430045  | 5.18268863 | 0.343066508 | PTH2      |
| YDL208W   | 113.109902 | 126.914034 | 113.001521 | 124.465791 | 103.990001 | 98.2607116 | -0.111486886  | 6.8258138  | 0.269830484 | NHP2      |
| YGL219C   | 40.8379355 | 42.8226945 | 41.8232731 | 40.5622484 | 39.0288287 | 36.5411056 | -0.111573009  | 5.33644635 | 0.23938823  | MDM34     |
| YBR249C   | 546.478654 | 453.839982 | 493.224099 | 476.872498 | 445.34565  | 459.862712 | -0.1111751897 | 8.90504371 | 0.249342981 | AR04      |
| YNR041C   | 66.353425  | 51.0534006 | 56.7731261 | 58.5373556 | 51.2782775 | 51.196284  | -0.111755706  | 5.80686015 | 0.300855882 | COQ2      |
| YPL007C   | 33.8014474 | 44.4343013 | 34.7417637 | 34.4719983 | 35.7709966 | 34.4106171 | -0.111899724  | 5.186544   | 0.345265602 | TFC8      |
| YHR218W   | 14.5333072 | 16.8643138 | 22.333991  | 0.05912864 | 23.3912346 | 26.2760247 | -0.112074643  | 4.11294563 | 0.898883769 | YHR218W   |
| YDL170W   | 35.3797251 | 37.2971856 | 32.6838892 | 32.5798817 | 32.1873813 | 32.7320504 | -0.112092405  | 5.08492327 | 0.270772917 | UGA3      |
| YGR181W   | 13.6784067 | 13.9288872 | 10.5920011 | 12.4170148 | 13.0313285 | 9.87771936 | -0.11210295   | 3.63020791 | 0.519635709 | TIM13     |
| YMR306W   | 34.32754   | 32.1745783 | 35.9522782 | 29.6234496 | 33.685984  | 31.5054055 | -0.112136683  | 5.04420385 | 0.287540497 | FKS3      |
| YER180C   | 12.7577447 | 17.2096582 | 13.4972357 | 16.2012479 | 13.2267984 | 10.781563  | -0.112190118  | 3.81799664 | 0.545028406 | ISC10     |
| YMR025W   | 4.34026368 | 8.00047653 | 5.08416055 | 5.97199284 | 5.60347123 | 4.58377827 | -0.112238866  | 2.52357958 | 0.677777621 | CSI1      |
| YOL052C   | 82.0704404 | 76.7815518 | 77.4729226 | 73.7925452 | 71.1510534 | 73.5986933 | -0.112356272  | 6.24668436 | 0.169153123 | SPE2      |
| YER182W   | 17.0980084 | 17.9003468 | 15.7972131 | 15.8464761 | 16.6149438 | 14.5260579 | -0.112585576  | 4.03791719 | 0.405430244 | FMP10     |
| YBL076C   | 1636.08212 | 1409.1199  | 1596.66851 | 1480.22642 | 1428.10329 | 1384.62384 | -0.112699619  | 10.5403765 | 0.243709404 | ILS1      |
| YDR518W   | 144.41241  | 122.424558 | 141.509135 | 116.365167 | 124.905283 | 136.351263 | -0.112745553  | 7.03454411 | 0.237184895 | EU61      |
| YPL239W   | 35.248202  | 38.851235  | 36.7996382 | 34.0580978 | 34.598177  | 33.9586953 | -0.112824095  | 5.15864117 | 0.24568591  | YAR1      |
| YGL210W   | 31.565554  | 35.8582509 | 30.2023347 | 27.908719  | 31.6009715 | 30.859803  | -0.112969547  | 4.97549063 | 0.313068474 | YPT32     |
| YOR193W   | 7.56258065 | 10.014985  | 6.05257208 | 8.92842494 | 6.7762908  | 6.13322444 | -0.113104876  | 2.95005177 | 0.619038854 | PEX27     |
| YJR068W   | 48.5320393 | 54.5068437 | 50.4179254 | 45.2925398 | 48.1507586 | 48.5493135 | -0.113139341  | 5.62566497 | 0.220544619 | RFC2      |
| YGL080W   | 19.3996634 | 26.6490693 | 19.6708593 | 19.15768   | 20.5243423 | 21.1757644 | -0.113204356  | 4.4086079  | 0.439138202 | MPC1      |
| YKL006W   | 1148.52584 | 1043.05493 | 1048.91074 | 1068.86846 | 972.397729 | 954.523404 | -0.113217112  | 10.0216831 | 0.236429355 | RPL14A    |
| YEL018W   | 14.0729762 | 14.792248  | 13.9814415 | 12.4761435 | 12.379762  | 14.7842989 | -0.113272502  | 3.79425829 | 0.431369686 | EAF5      |
| YFL017W-A | 2.82774755 | 3.8563448  | 5.02363483 | 4.90767729 | 2.67142233 | 3.22801286 | -0.113318507  | 1.963879   | 0.711129518 | SMX2      |
| YEL011W   | 88.6465975 | 72.0618462 | 85.2202149 | 78.8776084 | 71.7374631 | 76.5684651 | -0.113412597  | 6.30321041 | 0.233623444 | GLC3      |
| YKL194C   | 42.0216438 | 44.9523178 | 46.7863822 | 41.626564  | 42.2866608 | 39.7691185 | -0.113488122  | 5.42764483 | 0.224152367 | MST1      |
| YBR151W   | 99.6287799 | 120.697837 | 90.7280555 | 111.398362 | 93.695216  | 82.3788883 | -0.11361875   | 6.64260369 | 0.355829217 | APD1      |
| YBR109C   | 78.1247462 | 81.7314869 | 82.1939288 | 73.7925452 | 71.8026198 | 78.1179113 | -0.113941595  | 6.28092478 | 0.168260119 | CMD1      |
| YJL066C   | 30.0530379 | 34.822218  | 27.1760486 | 26.1348598 | 26.9748499 | 32.0218876 | -0.114029784  | 4.89045396 | 0.369420882 | MPM1      |
| YPL169C   | 131.917711 | 144.469037 | 125.954025 | 117.015583 | 129.466248 | 125.37602  | -0.114090891  | 7.01302801 | 0.197766345 | MEX67     |
| YLR168C   | 18.084432  | 23.310741  | 20.2761165 | 20.7541533 | 18.5044864 | 17.7540707 | -0.114116074  | 4.31695186 | 0.409115091 | UPS2      |
| YIL164C   | 11.5082749 | 8.74872254 | 11.6209384 | 12.890044  | 9.64318305 | 6.84338727 | -0.114210305  | 3.37059768 | 0.609026729 | NIT1      |
| YDR266C   | 112.518048 | 122.654788 | 114.030458 | 107.436743 | 107.8994   | 107.299148 | -0.114451583  | 6.80874025 | 0.162136859 | HEL2      |
| YIL035C   | 80.1633549 | 85.7605039 | 76.6860882 | 82.247941  | 73.3012225 | 68.498433  | -0.114459025  | 6.2838996  | 0.217649104 | CKA1      |
| YHR091C   | 56.5549509 | 61.874189  | 55.9862917 | 50.9688894 | 52.6465669 | 57.5877495 | -0.114487856  | 5.80904556 | 0.21528306  | MSR1      |
| YMR234W   | 25.1866816 | 28.83625   | 24.5129169 | 22.9419131 | 23.9124877 | 25.7595426 | -0.114574252  | 4.66236789 | 0.335051963 | RNH1      |
| YER037W   | 23.0823114 | 25.6705938 | 24.270814  | 23.119299  | 20.5243423 | 23.8227349 | -0.114596037  | 4.55779268 | 0.334061961 | PHM8      |
| YOR365C   | 15.2566844 | 16.3462974 | 13.4972357 | 13.7178449 | 13.291955  | 14.6551784 | -0.114774446  | 3.86687358 | 0.425555896 | YOR365C   |
| YEL001C   | 266.2686   | 232.071377 | 267.644737 | 234.504194 | 226.940585 | 245.84546  | -0.11486508   | 7.94053723 | 0.222093241 | IRC22     |
| YJR112W   | 20.4518485 | 16.0009531 | 17.6735105 | 18.8620368 | 16.7452571 | 14.2678169 | -0.114949644  | 4.12556317 | 0.441722561 | NNF1      |
| YDR526C   | 6.44463394 | 9.78475547 | 8.29202375 | 5.67634963 | 8.014267   | 9.03843602 | -0.114972048  | 3.00097591 | 0.612200643 | YDR526C   |
| YDR092W   | 47.6113773 | 61.2986152 | 41.6416959 | 54.1027074 | 43.1336972 | 41.7704864 | -0.115018443  | 5.59757347 | 0.410674723 | UBC13     |
| YBR180W   | 5.1951641  | 5.00749251 | 3.93417185 | 3.6659758  | 4.6261216  | 4.77745904 | -0.115144557  | 2.21742236 | 0.586141835 | DTR1      |
| YLR463C   | 1.5782777  | 1.38137724 | 1.39209158 | 2.12863111 | 0          | 1.87224746 | -0.115199626  | 0.6098988  | 0.893320808 | YLR463C   |
| YPL041C   | 18.4132398 | 14.2742315 | 15.7972131 | 13.8952309 | 15.7027508 | 15.1071002 | -0.115729194  | 3.96692633 | 0.432575678 | YPL041C   |
| YJR094W-A | 211.226166 | 209.33621  | 196.769118 | 206.477218 | 182.308285 | 180.833281 | -0.115806332  | 7.62907146 | 0.210583101 | RPL43B    |
| YOR175C   | 293.822699 | 252.216462 | 292.036603 | 266.847561 | 255.088254 | 251.333082 | -0.115901011  | 8.06973091 | 0.221509697 | ALE1      |
| YGL148W   | 307.106536 | 322.206242 | 308.136445 | 272.878683 | 287.992359 | 304.207932 | -0.116038281  | 8.23144916 | 0.195830709 | ARO2      |
| YBR118W   | 14970.6216 | 13325.4556 | 13673.0024 | 13620.2236 | 12391.9463 | 12712.1729 | -0.116081528  | 13.7152139 | 0.225097041 | TEF2      |
| YBL015W   | 65.893094  | 61.125943  | 71.3598248 | 62.26246   | 61.3124004 | 59.3954367 | -0.116216076  | 5.99285455 | 0.193593451 | ACH1      |
| YEL054C   | 779.07733  | 749.224482 | 737.021707 | 738.694125 | 680.235345 | 670.910193 | -0.116264642  | 9.50380827 | 0.204689851 | RPL12A    |
| YER154W   | 137.244398 | 119.661804 | 135.396037 | 113.467864 | 116.650246 | 129.701557 | -0.116579036  | 6.97496912 | 0.201294146 | OXA1      |
| YPL224C   | 61.0924993 | 60.4352544 | 63.1888525 | 55.5217948 | 57.2075319 | 57.6523097 | -0.116715428  | 5.89015877 | 0.164794877 | MMT2      |
| YPL071C   | 5.98430295 | 7.94291915 | 5.44731487 | 6.03112149 | 6.25503766 | 5.61674238 | -0.116719801  | 2.66663683 | 0.570892872 | YPL071C   |
| YLR212C   | 96.9325555 | 76.4937649 | 86.4307293 | 78.2271934 | 79.0350071 | 82.2497678 | -0.11688838   | 6.38084344 | 0.222322186 | TUB4      |
| YMR078C   | 62.4734923 | 65.0398452 | 65.7309328 | 60.2520862 | 58.1197249 | 59.8473585 | -0.116894334  | 5.95520825 | 0.160003401 | CTF18     |
| YFL048C   | 137.375922 | 148.555611 | 140.903878 | 130.378656 | 127.837332 | 135.44742  | -0.116939907  | 7.09680801 | 0.158376877 | EMP47     |
| YDR429C   | 234.505762 | 245.885149 | 247.973878 | 236.514568 | 213.778943 | 221.312562 | -0.116991952  | 7.86707855 | 0.189927538 | TIF35     |
| YCL058W-A | 0.78913885 | 1.1511477  | 0.90788581 | 0.82780099 | 0.91219299 | 0.9038436  | -0.11719416   | 0.05990779 | 0.854770345 | ADF1      |
| YFR041C   | 40.2460814 | 49.1540069 | 41.8232731 | 45.2334111 | 36.3574064 | 39.3817569 | -0.117340426  | 5.39872627 | 0.305725931 | ERJ5      |
| YBR076C-A | 1.77556241 | 1.61160678 | 1.4526173  | 1.77385926 | 1.2379762  | 1.42032566 | -0.117517891  | 0.74161175 | 0.739807047 | YBR076C-A |
| YPR110C   | 202.940208 | 246.863625 | 217.408389 | 200.209582 | 211.498461 | 203.36481  | -0.117689197  | 7.74049554 | 0.223403802 | RPC40     |
| YPR065W   | 47.5456157 | 63.1980089 | 55.3810345 | 41.9813358 | 52.9723502 | 58.2979123 | -0.117962825  | 5.73773323 | 0.366683512 | ROX1      |



|           |            |            |            |            |            |            |              |            |             |           |
|-----------|------------|------------|------------|------------|------------|------------|--------------|------------|-------------|-----------|
| YHL001W   | 294.546076 | 314.55111  | 282.110385 | 295.22931  | 266.099727 | 259.790475 | -0.118099554 | 8.15749512 | 0.20908614  | RPL14B    |
| YGL028C   | 514.255484 | 427.881601 | 530.871097 | 388.82995  | 459.484641 | 508.928508 | -0.118104818 | 8.88205475 | 0.315842599 | SCW11     |
| YOR167C   | 229.968213 | 214.804161 | 203.426948 | 235.745896 | 190.127082 | 171.149242 | -0.118305906 | 7.69820141 | 0.304339402 | RPS28A    |
| YNR037C   | 16.1773464 | 17.4398877 | 13.7393386 | 14.9004178 | 13.291955  | 15.4299015 | -0.118424849 | 3.93500149 | 0.417167952 | RSM19     |
| YPL236C   | 24.7263506 | 23.1956262 | 23.1208253 | 22.0549835 | 21.8926318 | 21.4340054 | -0.118939616 | 4.51480191 | 0.288769322 | ENV7      |
| YDR542W   | 0.06576157 | 0.17267216 | 0.3026286  | 0.05912864 | 0.19546993 | 0.25824103 | -0.118952429 | -1.7396905 | 1           | PAU10     |
| YNL110C   | 32.2889313 | 40.1174974 | 34.3786094 | 33.1120395 | 31.9919114 | 33.3130927 | -0.11895838  | 5.10199777 | 0.282729152 | NOP15     |
| YDL202W   | 33.7356859 | 30.4478567 | 28.2049859 | 27.258304  | 28.0825128 | 29.6977183 | -0.118998095 | 4.89171635 | 0.280672225 | MRPL11    |
| YJR073C   | 96.3407013 | 71.9467314 | 83.0412889 | 84.4357008 | 75.0604519 | 71.7264458 | -0.119087602 | 6.33161262 | 0.274983184 | OPI3      |
| YCR024C   | 28.9350912 | 27.1095284 | 27.0549972 | 25.1888015 | 25.0853073 | 26.2114644 | -0.119105561 | 4.73979072 | 0.26349147  | SLM5      |
| YGL196W   | 63.3941543 | 69.0113048 | 60.2836179 | 60.3112149 | 58.9016046 | 58.2333521 | -0.119116919 | 5.95010889 | 0.175612958 | DSD1      |
| YPR056W   | 26.2388668 | 33.9012998 | 27.1760486 | 26.3122457 | 28.6689226 | 25.5013016 | -0.119288533 | 4.81294598 | 0.343852704 | TFB4      |
| YNL316C   | 24.7921122 | 26.1886102 | 24.9971227 | 22.7053985 | 23.4563912 | 23.8227349 | -0.119339681 | 4.61208787 | 0.279324363 | PHA2      |
| YPR192W   | 9.4696662  | 8.28826346 | 8.77622952 | 7.86410939 | 8.47036349 | 8.07003216 | -0.11951161  | 3.10559594 | 0.441627186 | AQY1      |
| YLR435W   | 19.1366171 | 25.6130364 | 20.9418994 | 25.4253161 | 17.1361969 | 17.8831913 | -0.119540089 | 4.40535361 | 0.477450746 | TSR2      |
| YIR026C   | 52.3462104 | 64.7520583 | 57.2573319 | 51.9149477 | 55.5786159 | 53.1330917 | -0.11959069  | 5.80661521 | 0.225123455 | YVH1      |
| YLR060W   | 598.561818 | 646.25432  | 571.483856 | 573.843471 | 553.179893 | 544.759451 | -0.119623856 | 9.18359609 | 0.193934263 | FRS1      |
| YIL134W   | 26.0415821 | 28.1455613 | 28.9918203 | 25.2479301 | 23.2609213 | 28.0837119 | -0.119657728 | 4.74210572 | 0.304194835 | FLX1      |
| YHR024C   | 95.8803703 | 94.451669  | 96.901679  | 86.8599751 | 85.6158279 | 91.8692461 | -0.119811326 | 6.52443391 | 0.140480125 | MAS2      |
| YNR005C   | 3.55112483 | 3.74123003 | 3.99469757 | 2.89730346 | 3.19267547 | 4.32553724 | -0.119977158 | 1.90256515 | 0.628937085 | YNR005C   |
| YCR084C   | 501.037408 | 411.880648 | 496.068808 | 416.206511 | 448.342855 | 431.843561 | -0.120086306 | 8.81699915 | 0.232323213 | TUP1      |
| YLL041C   | 110.216393 | 87.0267663 | 100.714799 | 94.7240845 | 94.9983844 | 84.2511357 | -0.120292926 | 6.57643272 | 0.227945039 | SDH2      |
| YML085C   | 414.692466 | 375.907282 | 413.269622 | 365.119364 | 371.262548 | 371.092359 | -0.120341986 | 8.58999936 | 0.179017001 | TUB1      |
| YDR020C   | 15.9143001 | 16.9794286 | 15.7972131 | 15.6690901 | 14.1389914 | 14.9779797 | -0.120350268 | 3.973969   | 0.360407294 | DAS2      |
| YMR036C   | 29.3296606 | 35.8006936 | 30.141809  | 28.5591341 | 31.0145617 | 28.1482722 | -0.12065412  | 4.93722352 | 0.295061964 | MIH1      |
| YJL003W   | 5.12940253 | 7.07955837 | 3.51049181 | 5.32157778 | 6.3294618  | 4.71289878 | -0.120858352 | 2.37057735 | 0.635821166 | COX16     |
| YCL056C   | 9.99575877 | 10.4754441 | 8.35254947 | 8.8692963  | 8.20973693 | 9.42579756 | -0.120906818 | 3.22485283 | 0.463098958 | PEX34     |
| YFL005W   | 85.5558037 | 123.403034 | 102.348994 | 105.603755 | 93.434625  | 87.2854678 | -0.121051604 | 6.64059935 | 0.321049572 | SEC4      |
| YPR083W   | 21.6355568 | 23.8863148 | 24.1497626 | 17.8568499 | 23.6518611 | 22.6606503 | -0.121084292 | 4.487151   | 0.369969334 | MDM36     |
| YER063W   | 60.1718373 | 63.7160254 | 60.4046694 | 62.1442028 | 60.4002074 | 46.8707468 | -0.121111189 | 5.88489896 | 0.261868256 | THO1      |
| YDR194C   | 177.622003 | 205.36475  | 202.034856 | 183.712691 | 177.55185  | 176.701424 | -0.121163152 | 7.54927313 | 0.18734692  | MSS116    |
| YOL031C   | 66.813756  | 76.8966665 | 73.1755964 | 66.9336228 | 66.2384618 | 66.238824  | -0.121196098 | 6.11973132 | 0.164595597 | SIL1      |
| YDR175C   | 39.1938962 | 44.1465144 | 38.796987  | 39.970962  | 36.6831896 | 35.637262  | -0.121298707 | 5.29328428 | 0.231387611 | RSM24     |
| YGL020C   | 74.3105751 | 85.3576022 | 74.7492652 | 73.7925452 | 76.7545246 | 65.0121791 | -0.121379416 | 6.23144287 | 0.203743212 | GET1      |
| YMR270C   | 34.2617784 | 36.4913822 | 36.0128039 | 33.8807119 | 31.4055016 | 32.8611709 | -0.121476911 | 5.09963729 | 0.219654483 | RRN9      |
| YDR462W   | 12.100129  | 13.0655264 | 12.0446184 | 12.6535294 | 9.83865298 | 11.6854066 | -0.121560373 | 3.5893645  | 0.43272999  | MRPL28    |
| YHR103W   | 136.586783 | 142.396971 | 144.353844 | 123.992762 | 134.09237  | 131.121883 | -0.121594226 | 7.08269449 | 0.142904183 | SBE22     |
| YOR19W    | 15.2566844 | 16.2311826 | 15.5561102 | 13.1265585 | 15.3118109 | 14.8488592 | -0.121891637 | 3.92395071 | 0.37772314  | YOR19W    |
| YER030W   | 17.6898626 | 22.7927245 | 17.6735105 | 20.9315393 | 17.5922934 | 14.9134194 | -0.121969404 | 4.22918439 | 0.451368237 | CHZ1      |
| YNL138W-A | 4.7348331  | 4.6621482  | 1.87629734 | 3.72510445 | 3.32298876 | 3.29257312 | -0.122146519 | 1.89789704 | 0.702504694 | YSF3      |
| YJR153W   | 9.27238149 | 10.5330015 | 10.8946297 | 8.10062396 | 10.0341229 | 10.1359604 | -0.122377685 | 3.31510368 | 0.467577563 | PGU1      |
| YIL044C   | 48.9923703 | 58.1905164 | 46.7258565 | 45.6473116 | 45.349023  | 50.4861212 | -0.12239547  | 5.62553485 | 0.245155211 | AGE2      |
| YMR130W   | 39.4569425 | 54.4492863 | 41.399593  | 40.6213771 | 41.9608776 | 41.8350467 | -0.122480682 | 5.44083642 | 0.30980844  | YMR130W   |
| YAR002W   | 75.9546144 | 90.5377668 | 81.0439401 | 74.2064457 | 80.0775133 | 73.2113317 | -0.12264109  | 6.30945353 | 0.180928737 | NUP60     |
| YIL051C   | 546.018323 | 466.963066 | 494.61619  | 466.288471 | 460.787774 | 457.473983 | -0.122721629 | 8.91330714 | 0.189278427 | MMF1      |
| YBL061C   | 90.9482525 | 92.7249475 | 97.8700905 | 76.4533341 | 89.3949132 | 92.8376499 | -0.122825769 | 6.4943657  | 0.186475874 | SKT5      |
| YFR025C   | 57.8701824 | 68.2055014 | 53.7468401 | 55.994824  | 53.6239166 | 55.5863815 | -0.122832676 | 5.84914419 | 0.223187443 | HIS2      |
| YPL104W   | 42.2846901 | 45.3552195 | 40.2496043 | 41.9813358 | 37.5302259 | 37.896871  | -0.122987728 | 5.35832944 | 0.212834025 | MSD1      |
| YOR103C   | 22.7535035 | 24.4043313 | 25.5418542 | 21.2863111 | 22.5441982 | 22.9834516 | -0.123047304 | 4.54728522 | 0.288170557 | OST2      |
| YNL076W   | 45.4412455 | 54.7946307 | 48.7232052 | 42.0404645 | 45.4793363 | 49.3885968 | -0.123234579 | 5.57830839 | 0.236166176 | MKS1      |
| YDR288W   | 15.322446  | 16.6340843 | 16.2208932 | 15.4325756 | 15.116341  | 13.6867745 | -0.123303026 | 3.95766438 | 0.356451664 | NSE3      |
| YJR030C   | 66.8795176 | 58.2480738 | 63.4914811 | 55.5217948 | 59.3577011 | 58.2333521 | -0.123325204 | 5.91652018 | 0.167763054 | YJR030C   |
| YLR242C   | 21.306749  | 19.8572979 | 23.4234539 | 15.2551896 | 20.589499  | 23.4999336 | -0.123621207 | 4.37580911 | 0.435526978 | ARV1      |
| YPR044C   | 777.236006 | 908.831111 | 799.605297 | 910.699344 | 752.103122 | 618.487265 | -0.123757971 | 9.63418818 | 0.337729413 | OPH1      |
| YOL049W   | 134.350889 | 159.606629 | 137.514438 | 127.599609 | 128.684368 | 139.837517 | -0.123777768 | 7.10926818 | 0.183962586 | GSH2      |
| YDR404C   | 66.6822329 | 45.873236  | 63.1888525 | 49.4315447 | 47.173409  | 64.6248175 | -0.123802586 | 5.81396857 | 0.390245743 | RPB7      |
| YBR190W   | 0.19728471 | 0.23022954 | 0.12105144 | 0.17738593 | 0.06515664 | 0.25824103 | -0.124196    | -1.7398427 | 1           | YBR190W   |
| YDR516C   | 126.327978 | 121.964099 | 119.296196 | 121.982388 | 108.420653 | 106.718105 | -0.124300068 | 6.87756375 | 0.149607958 | EMI2      |
| YGR071C   | 60.6321683 | 67.8025997 | 61.3730809 | 52.0923336 | 60.7911472 | 61.3968047 | -0.124352155 | 5.92616863 | 0.197751595 | ENV11     |
| YDR091C   | 457.634772 | 417.003255 | 453.579752 | 392.436797 | 402.277109 | 423.773529 | -0.124369673 | 8.72985204 | 0.171307014 | RLI1      |
| YOR258W   | 4.27450211 | 5.8132959  | 5.26573771 | 4.90767729 | 4.6261216  | 4.58377827 | -0.124386878 | 2.33628569 | 0.554594068 | HNT3      |
| YDR305C   | 13.0865526 | 19.5119536 | 16.4024703 | 13.6587163 | 16.3543172 | 15.0425399 | -0.124446042 | 3.98361835 | 0.455648522 | HNT2      |
| YMR314W   | 104.297851 | 116.66882  | 102.40952  | 90.6442082 | 102.295928 | 103.812894 | -0.124642038 | 6.69324373 | 0.172173444 | PRE5      |
| YBL045C   | 408.905448 | 396.340154 | 390.754053 | 360.389073 | 358.035749 | 378.516788 | -0.124710179 | 8.57848811 | 0.154571803 | COR1      |
| YMR243C   | 531.024685 | 417.233485 | 486.808372 | 424.307135 | 424.169741 | 467.609943 | -0.12476209  | 8.84118688 | 0.236039063 | ZRC1      |
| YDR486C   | 21.76708   | 30.9658732 | 28.0839344 | 24.3610005 | 23.3260779 | 26.5342657 | -0.124795059 | 4.69992233 | 0.368604431 | VPS60     |
| YJR069C   | 45.8358149 | 61.5288447 | 47.6337423 | 52.1514623 | 47.4304356 | 42.6097698 | -0.12486256  | 5.63493062 | 0.307013716 | HAM1      |
| YLR394W   | 34.5248247 | 33.7861851 | 34.1970322 | 28.1618267 | 32.9041043 | 32.5383697 | -0.124881741 | 5.03910722 | 0.230990695 | CST9      |
| YOR020W-A | 2.95927069 | 5.06504989 | 4.23680046 | 4.0798763  | 3.84424189 | 3.35713338 | -0.125037961 | 2.02425417 | 0.624027342 | YOR020W-A |
| YKR004C   | 19.2023787 | 23.2531836 | 20.3366422 | 18.9802941 | 20.3288724 | 18.3351131 | -0.125141405 | 4.33703547 | 0.327774478 | ECM9      |
| YJR006W   | 65.893094  | 71.6589445 | 65.1256756 | 63.6224188 | 60.3350507 | 61.8487265 | -0.125557063 | 6.01979829 | 0.144380396 | POL31     |
| YHL019W-A | 6.24734923 | 4.94993512 | 3.81312041 | 4.13900494 | 4.56096496 | 5.03570007 | -0.125652601 | 2.29335086 | 0.56697773  | YHL019W-A |
| YCR071C   | 11.5082749 | 12.54751   | 12.6498756 | 11.3526993 | 10.8160026 | 11.4917258 | -0.125663893 | 3.56808255 | 0.39217414  | IMG2      |

|           |            |            |            |            |            |            |              |            |             |         |
|-----------|------------|------------|------------|------------|------------|------------|--------------|------------|-------------|---------|
| YAL054C   | 28.2117139 | 21.3537899 | 25.2392256 | 21.9367262 | 21.7623185 | 24.7911388 | -0.125720543 | 4.58427655 | 0.335056299 | ACS1    |
| YNL151C   | 40.3776045 | 44.4918587 | 44.9100848 | 40.5031198 | 40.3319616 | 38.155112  | -0.125748851 | 5.37848233 | 0.187911193 | RPC31   |
| YNR047W   | 88.3177897 | 66.4787798 | 86.9149351 | 71.0726277 | 76.8196812 | 73.534133  | -0.125882369 | 6.27226809 | 0.241490532 | FPK1    |
| YDR336W   | 12.56046   | 19.8572979 | 14.7077502 | 13.2448158 | 15.8982207 | 14.1386963 | -0.125949289 | 3.92738768 | 0.494047999 | YDR336W |
| YJR059W   | 167.823529 | 147.116676 | 157.972131 | 141.672226 | 148.491988 | 143.13009  | -0.125985802 | 7.23982902 | 0.143226064 | PTK2    |
| YKR014C   | 57.6071361 | 63.0828941 | 62.7046467 | 56.7634963 | 58.4455081 | 52.8748507 | -0.126240365 | 5.87568703 | 0.155888552 | YPT52   |
| YIL096C   | 15.782777  | 17.9579042 | 17.128779  | 14.1908741 | 15.4421242 | 17.0439079 | -0.126298155 | 4.03441329 | 0.363582106 | BMT5    |
| YIL092W   | 16.243108  | 17.6701172 | 17.7945619 | 15.3734469 | 16.028534  | 16.0109438 | -0.126361727 | 4.05750061 | 0.325619728 | YIL092W |
| YGL245W   | 1153.32643 | 1159.37841 | 1155.92022 | 1074.48568 | 1066.02782 | 1036.96685 | -0.126475391 | 10.1135005 | 0.154712015 | GUS1    |
| YKL128C   | 75.8888528 | 98.0202269 | 86.4307293 | 81.597526  | 84.6384783 | 72.3074881 | -0.126794402 | 6.38021358 | 0.225317868 | PMU1    |
| YHR008C   | 214.974575 | 217.969818 | 203.124319 | 193.173273 | 191.886311 | 197.489827 | -0.126811718 | 7.66697778 | 0.14313357  | SOD2    |
| YLR165C   | 7.62834222 | 10.1876572 | 9.38148672 | 7.98236667 | 8.27489357 | 8.71563473 | -0.126820599 | 3.14287233 | 0.472225808 | PUS5    |
| YLR367W   | 120.080628 | 141.476053 | 120.143556 | 111.812262 | 116.43492  | 121.437844 | -0.126918302 | 6.93114609 | 0.168368588 | RPS22B  |
| YPL250C   | 7.03648808 | 5.52550897 | 6.17362352 | 6.38589334 | 5.79894116 | 4.90657955 | -0.127159692 | 2.60720563 | 0.507876302 | ICY2    |
| YGR120C   | 19.5969481 | 26.1310529 | 15.1314302 | 19.0985514 | 18.765113  | 17.8831913 | -0.127505829 | 4.29132052 | 0.469874941 | COG2    |
| YGL018C   | 5.58973352 | 9.03650947 | 8.71570379 | 7.09543704 | 6.3201943  | 8.0054719  | -0.127582631 | 2.92745626 | 0.551205826 | JAC1    |
| YOL094C   | 29.9215147 | 38.6210054 | 32.8654664 | 31.9885953 | 31.8615981 | 29.0521158 | -0.127599265 | 5.02385338 | 0.279423306 | RFC4    |
| YDL080C   | 42.6134979 | 43.6284979 | 41.7022216 | 37.9605882 | 39.0288287 | 40.15648   | -0.127630463 | 5.35667072 | 0.166302698 | THI3    |
| YER099C   | 72.2062048 | 81.5012574 | 69.9677332 | 72.7282297 | 68.5447877 | 63.4627329 | -0.127691106 | 6.16078219 | 0.171233421 | PRS2    |
| YOR092W   | 96.077655  | 81.2710278 | 92.0596213 | 80.2966959 | 83.2701888 | 82.8953703 | -0.127929154 | 6.42779215 | 0.14760532  | ECM3    |
| YDR075W   | 20.3203254 | 28.7211352 | 22.333991  | 22.6462699 | 21.4365353 | 21.3048849 | -0.12804435  | 4.52024367 | 0.363699462 | PPH3    |
| YIL138C   | 26.6991978 | 42.1895633 | 31.3523234 | 37.0736585 | 27.3657898 | 27.3089888 | -0.128064866 | 5.00800074 | 0.442261307 | TPM2    |
| YIL128W   | 110.808247 | 116.323475 | 106.041063 | 101.87865  | 102.100458 | 100.907682 | -0.128117425 | 6.73436889 | 0.116432523 | MET18   |
| YER007C-A | 40.9036971 | 51.3411875 | 40.0680272 | 40.0892193 | 39.6803951 | 41.3831249 | -0.128248527 | 5.40557627 | 0.246461597 | TMA20   |
| YBR202W   | 132.641088 | 134.626724 | 140.480198 | 118.316413 | 127.120609 | 127.700189 | -0.128253439 | 7.02538951 | 0.120894141 | MCM7    |
| YOR057W   | 44.7178682 | 60.2625822 | 43.3969418 | 46.5342413 | 43.4594804 | 45.8377827 | -0.128324659 | 5.5704898  | 0.293124889 | SGT1    |
| YOL012C   | 52.0831641 | 53.4132534 | 52.233697  | 48.4263578 | 49.909988  | 45.9669032 | -0.12846982  | 5.65732424 | 0.144158383 | HTZ1    |
| YCR028C-A | 106.402222 | 113.445606 | 109.127875 | 95.7884001 | 100.797326 | 104.458496 | -0.128475248 | 6.71606042 | 0.119440958 | RIM1    |
| YMR308C   | 539.573689 | 527.052976 | 541.826253 | 480.006316 | 498.057373 | 493.111245 | -0.128711458 | 9.00392664 | 0.140259301 | PSE1    |
| YER186C   | 29.9215147 | 41.1535304 | 33.591775  | 33.3485541 | 32.3828512 | 30.0850799 | -0.12871426  | 5.06902206 | 0.30546723  | YER186C |
| YBR052C   | 81.675871  | 93.703423  | 77.7150255 | 81.8340405 | 72.1935596 | 77.4723087 | -0.128740419 | 6.338257   | 0.174378647 | RFS1    |
| YBR174C   | 3.35384011 | 1.84183632 | 2.84470888 | 1.8329879  | 2.01985591 | 3.48625389 | -0.128782276 | 1.41676021 | 0.701344301 | YBR174C |
| YOR043W   | 159.07724  | 172.211696 | 166.264155 | 145.042559 | 152.14076  | 157.914389 | -0.128992211 | 7.31202758 | 0.133007772 | WHI2    |
| YPL010W   | 117.64745  | 124.554181 | 108.462092 | 108.441929 | 109.463159 | 102.77993  | -0.128994008 | 6.8076678  | 0.134697155 | RET3    |
| YCR043C   | 42.9423058 | 36.0884805 | 43.8811476 | 41.6856926 | 36.422563  | 34.1523761 | -0.129082875 | 5.29729327 | 0.253248693 | YCR043C |
| YBL042C   | 101.601627 | 81.44437   | 91.6359413 | 78.0498075 | 83.1398755 | 89.8678781 | -0.129342292 | 6.45493936 | 0.188630327 | FUI1    |
| YPL049C   | 162.891411 | 160.067088 | 168.987812 | 141.790484 | 155.528905 | 152.491328 | -0.12935171  | 7.295365   | 0.128068321 | DIG1    |
| YEL019C   | 8.02291165 | 9.43941116 | 10.4709497 | 7.80498075 | 9.83865298 | 7.94091164 | -0.129775681 | 3.17775089 | 0.468370038 | MMS21   |
| YPR008W   | 116.529504 | 119.546689 | 117.359373 | 106.017655 | 108.616123 | 108.396672 | -0.12994672  | 6.81855734 | 0.102297513 | HAA1    |
| YOR261C   | 109.098446 | 137.389478 | 115.664652 | 111.280104 | 113.502871 | 106.266183 | -0.13006827  | 6.85401278 | 0.179983217 | RPN8    |
| YHR171W   | 24.5290659 | 30.5054141 | 23.7866083 | 25.3070588 | 22.4790416 | 24.2746567 | -0.130088158 | 4.660694   | 0.310182639 | ATG7    |
| YJR013W   | 57.2783282 | 51.3987449 | 54.1705201 | 48.4854864 | 49.5190481 | 50.7443622 | -0.130125333 | 5.70183037 | 0.144643207 | GPH14   |
| YMR244W   | 2.56470126 | 2.41741018 | 2.60260599 | 2.01037383 | 2.73657898 | 2.19504875 | -0.130274236 | 1.3455096  | 0.649136716 | YMR244W |
| YGR112W   | 18.4790014 | 19.1666093 | 17.9761391 | 18.1473062 | 18.5044864 | 15.1716605 | -0.130326768 | 4.15947544 | 0.319189318 | SHY1    |
| YNR055C   | 194.391203 | 155.577612 | 184.603448 | 153.557083 | 164.585678 | 170.180838 | -0.13035071  | 7.41436402 | 0.19384504  | HOL1    |
| YBR089W   | 34.1960169 | 43.8587275 | 31.5339005 | 31.9294667 | 30.8190918 | 37.4449492 | -0.130495277 | 5.13361015 | 0.326647872 | YBR089W |
| YLL054C   | 46.9537616 | 52.0318762 | 53.0205314 | 45.5290543 | 49.0629516 | 44.3528967 | -0.130502735 | 5.60366774 | 0.166897515 | YLL054C |
| YKL099C   | 24.9236354 | 29.2391517 | 26.5707914 | 27.0217894 | 24.3034276 | 22.4024093 | -0.131020037 | 4.69434684 | 0.277543558 | UTP11   |
| YHL039W   | 127.840494 | 119.776918 | 121.293544 | 111.339233 | 109.984412 | 115.4983   | -0.131072189 | 6.87951001 | 0.106603708 | FEM1    |
| YPL174C   | 42.0216438 | 39.3116941 | 40.7943358 | 36.659758  | 35.2497435 | 39.5754377 | -0.13111346  | 5.28753321 | 0.17471751  | NIP100  |
| YBR066C   | 15.1251613 | 20.4904291 | 13.3761843 | 17.0290489 | 15.8330641 | 11.8790873 | -0.131290563 | 3.97966458 | 0.492191333 | NRG2    |
| YJL045W   | 8.48324264 | 7.71268961 | 8.53412663 | 7.39108025 | 6.90660408 | 8.26371293 | -0.131347236 | 3.00071102 | 0.427852221 | YJL045W |
| YOL025W   | 30.4476073 | 31.3112175 | 29.3549746 | 28.8547773 | 28.7992359 | 25.5013016 | -0.131561639 | 4.8667657  | 0.218865766 | LAG2    |
| YLR027C   | 604.08579  | 479.395461 | 548.665659 | 479.237643 | 501.054579 | 509.31587  | -0.131751029 | 9.0234686  | 0.19555019  | AAT2    |
| YNL100W   | 25.0551585 | 27.9728892 | 25.6023799 | 24.2427432 | 23.9124877 | 23.6290542 | -0.13213629  | 4.65564052 | 0.23464921  | MIC27   |
| YGR114C   | 18.4790014 | 16.2311826 | 16.3419446 | 16.7334057 | 16.2891606 | 13.4930938 | -0.132138346 | 4.03432746 | 0.345929495 | YGR114C |
| YBR171W   | 59.1854138 | 68.147944  | 53.32316   | 60.1929576 | 55.0573627 | 49.5822776 | -0.132156407 | 5.85120542 | 0.226199305 | SEC66   |
| YJL204C   | 39.7199888 | 50.8231711 | 44.002199  | 34.5311269 | 44.6974566 | 43.7072942 | -0.132156698 | 5.42775923 | 0.284697928 | RCY1    |
| YDL099W   | 33.0780701 | 37.815202  | 35.3470209 | 32.3433672 | 31.7312848 | 32.9257312 | -0.132230869 | 5.08794001 | 0.195747766 | BUG1    |
| YMR255W   | 17.16377   | 17.3247729 | 16.9472018 | 12.2987575 | 17.5922934 | 17.1084682 | -0.132319116 | 4.04584129 | 0.402075294 | GFD1    |
| YLL045C   | 1833.69564 | 2158.11416 | 1725.76988 | 2105.98484 | 1710.49217 | 1399.7955  | -0.132372246 | 10.8316819 | 0.336428956 | RPL8B   |
| YGR068C   | 57.6071361 | 53.7010403 | 60.2230922 | 45.5290543 | 55.187676  | 55.8446225 | -0.132374141 | 5.77592342 | 0.194256838 | ART5    |
| YOR003W   | 18.3474783 | 17.9003468 | 17.4919333 | 16.2012479 | 15.7027508 | 17.1084682 | -0.132530227 | 4.10855647 | 0.293472474 | YSP3    |
| YLR193C   | 25.8442974 | 21.3537899 | 21.1840023 | 20.1628669 | 20.1334025 | 22.0150477 | -0.13269374  | 4.45241933 | 0.292347446 | UPS1    |
| YHR022C   | 11.3767518 | 10.8207884 | 11.499887  | 10.2292551 | 9.77349634 | 10.7170027 | -0.132804801 | 3.44107191 | 0.369385223 | YHR022C |
| YER148W   | 63.131108  | 81.3861426 | 64.9440984 | 63.3267756 | 60.7911472 | 67.013547  | -0.132970964 | 6.06421979 | 0.209592825 | SPT15   |
| YPR201W   | 7.16801122 | 8.17314869 | 7.32361222 | 6.56327926 | 6.90660408 | 7.23074881 | -0.133310221 | 2.87905307 | 0.434812676 | ARR3    |
| YPL084W   | 112.18924  | 116.726377 | 109.975235 | 100.991721 | 104.120314 | 103.877454 | -0.133491096 | 6.75634496 | 0.097143188 | BR01    |
| YJL138C   | 1636.01636 | 1346.38235 | 1549.76108 | 1315.55316 | 1366.79088 | 1448.73217 | -0.133659101 | 10.4958347 | 0.188607917 | TIF2    |
| YDR409W   | 72.1404432 | 67.7450423 | 64.823047  | 57.2365255 | 62.28975   | 67.0781073 | -0.133750759 | 6.02973935 | 0.146675074 | SIZ1    |
| YEL032W   | 218.657223 | 215.207063 | 237.079248 | 203.934686 | 202.832627 | 204.720576 | -0.133861729 | 7.74057242 | 0.128583386 | MCM3    |
| YML121W   | 52.872303  | 55.0248602 | 51.4468627 | 55.9356953 | 45.5444929 | 43.6427339 | -0.13390899  | 5.66932618 | 0.204665088 | GTR1    |
| YDR191W   | 17.3610547 | 17.3823303 | 15.3130074 | 15.4325756 | 16.0936906 | 14.0741361 | -0.134138106 | 4.00625088 | 0.321080596 | HST4    |

|           |            |            |            |            |            |            |              |             |             |           |
|-----------|------------|------------|------------|------------|------------|------------|--------------|-------------|-------------|-----------|
| YLR275W   | 5.45821038 | 4.48947604 | 3.08681176 | 4.43464815 | 3.77908525 | 3.61537441 | -0.134161026 | 2.09265787  | 0.581298177 | SMD2      |
| YPR143W   | 25.2524432 | 34.2466442 | 30.3839118 | 29.2686778 | 29.0598624 | 23.6290542 | -0.134222348 | 4.8477434   | 0.320893486 | RRP15     |
| YPL038W   | 11.3767518 | 10.8207884 | 11.3183098 | 9.2831968  | 10.4250628 | 10.8461232 | -0.134292724 | 3.43255437  | 0.377667539 | MET31     |
| YLR364W   | 5.58973352 | 5.4103942  | 5.62889203 | 5.02593457 | 5.40800131 | 4.71289878 | -0.134305525 | 2.43837765  | 0.470096249 | GRX8      |
| YOL069W   | 30.3160842 | 30.7356437 | 30.2628604 | 27.5539472 | 27.7567296 | 27.8900311 | -0.134409953 | 4.86858659  | 0.183755698 | NUF2      |
| YMR228W   | 25.6470126 | 30.6780863 | 24.5734426 | 26.4896316 | 24.8898373 | 22.337849  | -0.134420925 | 4.69569996  | 0.286448432 | MTF1      |
| YJL193W   | 66.0903787 | 57.0969261 | 67.6677558 | 50.4958603 | 58.3151948 | 65.0767393 | -0.134536121 | 5.92828075  | 0.214106205 | YJL193W   |
| YOL040C   | 1184.43165 | 1048.86823 | 1030.32935 | 1142.54275 | 981.128719 | 849.096504 | -0.134601526 | 10.0217188  | 0.24666497  | RPS15     |
| YPR101W   | 10.9821823 | 15.1951497 | 12.9525043 | 9.9927405  | 11.5327257 | 14.2032566 | -0.134735954 | 3.65656211  | 0.46929941  | SNT309    |
| YCL007C   | 4.60330996 | 3.91390219 | 4.23680046 | 3.19294667 | 4.6261216  | 3.80905518 | -0.134748807 | 2.06245492  | 0.553459607 | YCL007C   |
| YHR184W   | 2.69622441 | 6.73421406 | 3.32891464 | 3.37033259 | 4.75643489 | 3.55081415 | -0.134765758 | 2.0772986   | 0.694600954 | SSP1      |
| YMR166C   | 27.1595288 | 26.2461676 | 26.5707914 | 26.1348598 | 23.7821744 | 22.8543311 | -0.134902727 | 4.67750199  | 0.224597437 | YMR166C   |
| YPL131W   | 3036.73782 | 2820.25431 | 2876.66646 | 2580.84697 | 2668.35997 | 2704.75198 | -0.134908349 | 11.4415892  | 0.138907884 | RPL5      |
| YHR154W   | 124.092084 | 108.898573 | 118.872516 | 108.85583  | 108.746436 | 102.715369 | -0.135016035 | 6.80928281  | 0.114199326 | RTT107    |
| YAL046C   | 22.6219804 | 23.1380688 | 21.4866309 | 24.9522869 | 18.6347997 | 17.56039   | -0.135168036 | 4.42934919  | 0.344753486 | AIM1      |
| YLR203C   | 171.374654 | 138.943528 | 162.753663 | 142.38177  | 142.888516 | 145.325139 | -0.135350093 | 7.23574663  | 0.14872025  | MSS51     |
| YIR034C   | 52.7407798 | 52.6650074 | 53.8073658 | 46.7707558 | 50.3660845 | 47.8391506 | -0.135501742 | 5.66741182  | 0.121622752 | LYS1      |
| YKL130C   | 26.2388668 | 31.7141192 | 26.0865857 | 24.8340296 | 23.5215479 | 28.2128324 | -0.135599228 | 4.74988626  | 0.278311345 | SHE2      |
| YLR021W   | 13.020791  | 18.7061502 | 11.923567  | 14.7821605 | 13.2267984 | 11.7499668 | -0.135629968 | 3.813177    | 0.470474587 | IRC25     |
| YCR095C   | 19.7942328 | 25.4403642 | 21.6076823 | 20.6950247 | 20.7198122 | 19.4971977 | -0.135667621 | 4.42206345  | 0.295830118 | OCA4      |
| YKL168C   | 45.3754839 | 46.3912524 | 49.8731939 | 42.7500082 | 43.6549503 | 42.5452095 | -0.135726801 | 5.49916449  | 0.134203954 | KKQ8      |
| YOR269W   | 39.3254194 | 40.347727  | 41.9443245 | 35.7728284 | 35.70584   | 39.2526364 | -0.135809707 | 5.27995167  | 0.158147765 | PAC1      |
| YMR245W   | 9.86423563 | 12.0870509 | 11.5604127 | 10.9979274 | 8.86130335 | 10.6524424 | -0.135893065 | 3.4348433   | 0.407601563 | YMR245W   |
| YHR157W   | 3.09079383 | 2.93542664 | 2.48155455 | 2.42427432 | 2.15016919 | 3.16345261 | -0.136022631 | 1.5006365   | 0.617450259 | REC104    |
| YMR271C   | 8.15443479 | 7.65513222 | 8.17097231 | 8.27800988 | 7.16723065 | 6.32690521 | -0.136100056 | 2.955486    | 0.18145893  | URA10     |
| YMR253C   | 43.7314446 | 39.7721531 | 45.6363935 | 37.7240736 | 38.8985154 | 40.8666428 | -0.136214884 | 5.36540849  | 0.163803729 | YMR253C   |
| YGL060W   | 39.5884657 | 47.6575149 | 45.0311363 | 37.664945  | 42.0260343 | 40.8020826 | -0.136275916 | 5.40137925  | 0.190214613 | YBP2      |
| YDR417C   | 766.648393 | 886.959305 | 756.14783  | 711.967978 | 740.635553 | 739.989669 | -0.136310349 | 9.58345103  | 0.159376154 | YDR417C   |
| YJR119C   | 20.7148948 | 26.5339546 | 22.757671  | 20.3993815 | 22.0881017 | 21.3048849 | -0.1363475   | 4.48800131  | 0.288114112 | JHD2      |
| YPL034W   | 4.80059467 | 8.57605039 | 6.59730357 | 5.08506321 | 6.64597751 | 6.52058598 | -0.136425389 | 2.70295896  | 0.565458502 | YPL034W   |
| YOR090C   | 89.5672595 | 89.7895208 | 86.3096779 | 76.9854919 | 83.9869119 | 80.7648818 | -0.136474247 | 6.40412751  | 0.095927882 | PTC5      |
| YLR169C   | 148.884196 | 120.985624 | 137.030232 | 129.373469 | 119.451981 | 119.178235 | -0.136490022 | 7.01792655  | 0.145351136 | PSD1      |
| YER079C-A | 14.862115  | 14.8498054 | 12.7709271 | 11.1161847 | 12.575232  | 14.9779797 | -0.136946669 | 3.76994626  | 0.388470694 | YER079C-A |
| YJL160C   | 4.66907153 | 5.12260728 | 5.20521199 | 4.19813358 | 5.01706145 | 4.45465775 | -0.137067618 | 2.29376526  | 0.482738251 | YJL160C   |
| YFL022C   | 466.052253 | 463.682295 | 457.332346 | 418.808171 | 421.172536 | 421.320239 | -0.13712066  | 8.78634218  | 0.113292269 | FRS2      |
| YDL089W   | 44.3232988 | 51.110958  | 45.1521877 | 44.3464815 | 40.7229014 | 42.8034506 | -0.137170282 | 5.48819324  | 0.157418948 | NUR1      |
| YBR019C   | 27.0280056 | 19.9724126 | 22.5760939 | 17.2655635 | 18.274752  | 24.1455362 | -0.137513579 | 4.47429071  | 0.371591028 | GAL10     |
| YLR172C   | 174.070878 | 181.420878 | 157.911606 | 161.894222 | 156.571411 | 148.230351 | -0.137531893 | 7.35301104  | 0.127441763 | DPH5      |
| YLR360W   | 36.4319103 | 46.7365967 | 36.9206897 | 36.3641148 | 36.3574064 | 36.5411056 | -0.137570007 | 5.26194536  | 0.227565244 | VPS38     |
| YOR319W   | 8.28595793 | 12.8352969 | 7.2630865  | 8.27800988 | 8.86130335 | 8.71563473 | -0.137623314 | 3.19919438  | 0.535815121 | HSH49     |
| YNL178W   | 1768.98626 | 2493.15569 | 1845.73186 | 2193.61349 | 1816.63234 | 1541.69894 | -0.137680089 | 10.9244278  | 0.345843981 | RPS3      |
| YHL040C   | 66.6164713 | 62.1044186 | 87.3991408 | 57.9460692 | 61.7033402 | 76.8267061 | -0.137793892 | 6.10608338  | 0.302389914 | ARN1      |
| YKL032C   | 126.788309 | 132.669773 | 150.285365 | 113.113092 | 128.032802 | 131.380124 | -0.1378254   | 7.02794317  | 0.148990824 | IXR1      |
| YKR077W   | 38.8650884 | 45.4703343 | 44.2443019 | 38.6110032 | 37.4650693 | 40.8666428 | -0.137935074 | 5.35967598  | 0.171229154 | MSA2      |
| YJL053W   | 38.010188  | 47.3121706 | 36.4364839 | 40.6805057 | 35.70584   | 34.2814966 | -0.137996986 | 5.28135445  | 0.249327188 | PEP8      |
| YGR227W   | 86.0161347 | 71.9467314 | 80.4992087 | 63.2085183 | 73.6270058 | 79.8610382 | -0.138102121 | 6.24719457  | 0.182954857 | DIE2      |
| YPR071W   | 22.3589341 | 21.2386751 | 23.1208253 | 16.9699203 | 21.2410654 | 22.4669695 | -0.138287073 | 4.4157864   | 0.301396836 | YPR071W   |
| YPL129W   | 69.6415035 | 82.940192  | 67.5467044 | 71.8413    | 66.3294618 | 61.8487265 | -0.138364105 | 6.13286013  | 0.170341574 | TAF14     |
| YMR210W   | 61.0924993 | 68.4932883 | 59.1336292 | 61.3755304 | 54.4709529 | 55.5863815 | -0.138520436 | 5.991096129 | 0.141793991 | YMR210W   |
| YER163C   | 31.4340309 | 37.4123003 | 35.9522782 | 32.047724  | 29.7765855 | 33.4422133 | -0.138596645 | 5.06551633  | 0.205621244 | GCC1      |
| YDR437W   | 4.60330996 | 3.74123003 | 5.14468627 | 4.49377679 | 3.97455518 | 3.74449492 | -0.138674382 | 2.14027684  | 0.520613433 | GPH19     |
| YDR296W   | 33.0780701 | 33.0954965 | 31.1707462 | 33.6441973 | 28.1476695 | 26.5342657 | -0.138780816 | 4.95815454  | 0.22599791  | MHR1      |
| YDR252W   | 8.41748107 | 6.90688622 | 10.2893725 | 6.79979383 | 7.49301386 | 8.97387576 | -0.138926688 | 3.04627783  | 0.485249399 | BTT1      |
| YDR357C   | 7.82562693 | 9.26673901 | 8.35254947 | 7.39108025 | 7.62332714 | 8.13459242 | -0.139157542 | 3.04103761  | 0.395343466 | CNL1      |
| YMR069W   | 5.91854138 | 5.23772205 | 6.65782929 | 5.08506321 | 4.82159153 | 6.26234495 | -0.13934284  | 2.53221612  | 0.492911648 | NAT4      |
| YDR247W   | 39.2596578 | 31.9443488 | 34.4391351 | 30.2147361 | 33.4905141 | 32.1510081 | -0.139395975 | 5.07426218  | 0.208553916 | VHS1      |
| YDR099W   | 285.142171 | 358.006936 | 280.960396 | 285.413955 | 290.533468 | 263.083048 | -0.139481579 | 8.19970164  | 0.196150676 | BMH2      |
| YLR118C   | 52.6092567 | 56.5789096 | 58.4678463 | 50.2002171 | 47.4340356 | 54.6179776 | -0.139525754 | 5.74018865  | 0.136584463 | YLR118C   |
| YNL182C   | 75.0339524 | 94.5667838 | 76.9281911 | 65.1006349 | 76.233274  | 82.6371293 | -0.139529709 | 6.29554694  | 0.214396056 | IPJ3      |
| YBL081W   | 74.7051445 | 62.4497629 | 79.8939514 | 44.3464815 | 70.4994869 | 82.2497678 | -0.139557076 | 6.1107896   | 0.414963395 | YBL081W   |
| YML055W   | 40.1803198 | 48.5208757 | 44.7285077 | 44.9968966 | 37.0741294 | 39.0589556 | -0.139559434 | 5.41212533  | 0.200302467 | SPC2      |
| YOL136C   | 200.309745 | 169.506499 | 217.408389 | 148.531149 | 188.433009 | 196.134062 | -0.139622222 | 7.54550721  | 0.24827865  | PKF27     |
| YNL137C   | 85.4242806 | 97.0993087 | 88.5491295 | 89.0477349 | 84.8991049 | 72.1138074 | -0.139670572 | 6.43188941  | 0.151872403 | NAM9      |
| YDR225W   | 191.563456 | 212.84721  | 187.508683 | 225.871412 | 177.877633 | 133.446052 | -0.139761947 | 7.55727361  | 0.339700785 | HTA1      |
| YLR051C   | 21.8328415 | 26.7641841 | 23.7866083 | 22.1732408 | 22.5441982 | 21.0466439 | -0.139804109 | 4.53397206  | 0.25319709  | FCF2      |
| YMR180C   | 11.7713212 | 18.2456911 | 12.6498756 | 12.5352721 | 12.379762  | 13.8804553 | -0.139965583 | 3.7789305   | 0.438430338 | CTL1      |
| YDL188C   | 120.066721 | 99.7469485 | 113.243624 | 96.4979438 | 94.4119746 | 111.753805 | -0.140051079 | 6.73000154  | 0.155576804 | PPH22     |
| YOR165W   | 148.62115  | 152.124169 | 146.895924 | 137.947122 | 134.809093 | 133.446052 | -0.140112509 | 7.15420678  | 0.08304374  | SEY1      |
| YGR064W   | 13.6126452 | 13.9864446 | 14.5866987 | 12.2396289 | 10.9463159 | 15.1071002 | -0.140199215 | 3.75921576  | 0.371854954 | YGR064W   |
| YBR130C   | 53.9244881 | 56.6940244 | 52.8389543 | 51.9740763 | 48.7371684 | 47.5809096 | -0.140238912 | 5.70307351  | 0.115955947 | SHE3      |
| YNL034W   | 2.23589341 | 2.12962325 | 1.87629734 | 1.89211654 | 2.15016919 | 1.61400643 | -0.140386244 | 1.07478438  | 0.605382542 | YNL034W   |
| YDL282W   | 11.7713212 | 12.3748378 | 11.9840927 | 9.9927405  | 11.1417858 | 11.6854066 | -0.140433878 | 3.53798514  | 0.346036268 | POP3      |
| YDR537C   | 19.1366171 | 14.6195758 | 21.4866309 | 12.6535294 | 18.569643  | 18.9161554 | -0.140533538 | 4.14235349  | 0.451331441 | YDR537C   |

|           |            |            |            |            |            |             |              |            |             |           |
|-----------|------------|------------|------------|------------|------------|-------------|--------------|------------|-------------|-----------|
| YLR323C   | 10.3245666 | 9.72719809 | 10.6525269 | 9.10581087 | 8.66583342 | 10.0714001  | -0.140645857 | 3.30473516 | 0.366744287 | CWC24     |
| YMR266W   | 392.004724 | 331.990997 | 399.046077 | 304.689892 | 353.996037 | 359.987994  | -0.140725755 | 8.48001209 | 0.179966171 | RSN1      |
| YDR069C   | 68.7208416 | 67.1694685 | 66.6388186 | 59.3060279 | 63.7883528 | 60.6220816  | -0.140781428 | 6.01116234 | 0.092685477 | DOA4      |
| YIL037C   | 12.4946985 | 11.2236901 | 14.949853  | 9.81535457 | 11.7933522 | 13.4930938  | -0.14078724  | 3.63320648 | 0.430121841 | PRM2      |
| YKL189W   | 19.5311865 | 19.4543962 | 16.2814189 | 16.2603766 | 16.6801004 | 17.1730284  | -0.141186795 | 4.1445997  | 0.287456712 | HYM1      |
| YDR366C   | 8.94357364 | 8.57605039 | 7.62624082 | 7.98236667 | 7.42785722 | 7.35986933  | -0.141188921 | 3.02014439 | 0.38790525  | YDR366C   |
| YJR063W   | 39.1281347 | 44.088957  | 38.796987  | 36.5415008 | 37.3999127 | 36.7347864  | -0.141578368 | 5.28233552 | 0.148874685 | RPA12     |
| YBR106W   | 380.95678  | 471.04964  | 396.443471 | 375.230362 | 387.030455 | 369.349232  | -0.141899057 | 8.63235116 | 0.157844274 | PHO88     |
| YLR059C   | 71.0882581 | 64.5218287 | 70.2098361 | 58.9512561 | 62.6806899 | 64.8830585  | -0.142002288 | 6.03353996 | 0.104344931 | REX2      |
| YNL314W   | 11.639798  | 10.9359032 | 11.0156812 | 9.93361186 | 10.0992796 | 10.3942014  | -0.142174566 | 3.43187947 | 0.343929664 | DAL82     |
| YER009W   | 243.778143 | 210.026898 | 230.663522 | 200.978254 | 210.651424 | 208.529631  | -0.142195473 | 7.76520983 | 0.121653147 | NTF2      |
| YNL001W   | 30.0530379 | 38.9663497 | 33.9549294 | 31.6338235 | 32.3176946 | 29.4394773  | -0.142324019 | 5.03893983 | 0.225462196 | DOM34     |
| YGL112C   | 100.549442 | 119.661804 | 109.309452 | 103.17948  | 99.4941927 | 95.9365423  | -0.142471904 | 6.7119837  | 0.111123443 | TAF6      |
| YOL157C   | 5.58973352 | 5.8132959  | 5.56836631 | 5.49896371 | 5.47315795 | 4.39009749  | -0.142659862 | 2.46447578 | 0.451850631 | IMA2      |
| YBR062C   | 13.8756915 | 21.066003  | 13.7393386 | 14.8412891 | 15.1814976 | 14.1386963  | -0.142662805 | 3.96585106 | 0.430843141 | YBR062C   |
| YPR106W   | 54.253296  | 44.7796456 | 51.5679141 | 40.5031198 | 45.5444929 | 50.3570007  | -0.142704847 | 5.58310483 | 0.190321406 | ISR1      |
| YEL010W   | 0.32880785 | 0.11511477 | 0.60525721 | 0.41390049 | 0.19546993 | 0.32280129  | -0.142715105 | -1.1382696 | 0.873311469 | YEL010W   |
| YEL075W-A | 5.45821038 | 5.06504989 | 6.77888073 | 3.31120395 | 7.16723065 | 5.22938084  | -0.143193875 | 2.48762599 | 0.605564001 | YEL075W-A |
| YMR183C   | 104.626659 | 109.128802 | 107.191052 | 97.621388  | 97.2137103 | 95.8074218  | -0.14320801  | 6.67333847 | 0.071269212 | SSO2      |
| YIR030W-A | 3.68264797 | 3.91390219 | 3.44996609 | 2.9564321  | 3.64877197 | 3.42169363  | -0.143222651 | 1.86191618 | 0.545792359 | YIR030W-A |
| YOR111W   | 10.9164208 | 18.2456911 | 11.1367326 | 14.1317454 | 12.4449187 | 9.94227962  | -0.143229285 | 3.69699295 | 0.511817088 | YOR111W   |
| YJL055W   | 91.7373914 | 89.6168487 | 91.3333127 | 82.6027129 | 78.5789106 | 85.6714614  | -0.143424315 | 6.43825708 | 0.078488831 | YJL055W   |
| YNL193W   | 43.2053521 | 49.0388921 | 42.7311589 | 41.5674353 | 39.6803951 | 40.9957634  | -0.143473228 | 5.42657316 | 0.135976795 | YNL193W   |
| YNL211C   | 1.5782777  | 2.7051971  | 2.11840023 | 2.2468884  | 1.75922934 | 1.8076872   | -0.143473886 | 1.12067143 | 0.633051956 | YNL211C   |
| YDL002C   | 15.9143001 | 20.7206587 | 17.4919333 | 17.3246921 | 16.5497817 | 17.11716605 | -0.143483459 | 4.11631926 | 0.319844667 | SNF8      |
| YLO088C   | 69.3126957 | 87.5447828 | 74.6887395 | 62.439846  | 70.6949569 | 76.6330254  | -0.143700724 | 6.20337675 | 0.18021689  | ASM4      |
| YJL146W   | 36.3003871 | 38.2756611 | 37.5259469 | 36.1867289 | 33.2298876 | 32.0218876  | -0.143796989 | 5.15901366 | 0.145626055 | IDS2      |
| YBL018C   | 6.37887237 | 11.3963623 | 5.8104692  | 7.50933754 | 6.71113415 | 7.16618856  | -0.143862796 | 2.93553268 | 0.570909703 | POP8      |
| YMR284W   | 21.8328415 | 26.9368562 | 22.6971453 | 20.2811242 | 21.1759087 | 23.3062529  | -0.144146699 | 4.51359787 | 0.259687115 | YKU70     |
| YLR411W   | 9.66695092 | 7.42490268 | 9.0183324  | 7.56846618 | 7.49301386 | 8.52195396  | -0.144438551 | 3.06962355 | 0.394910766 | CTR3      |
| YNL011C   | 30.8421767 | 34.4768737 | 29.9602318 | 28.2043622 | 29.5159589 | 28.5356337  | -0.144530125 | 4.92548861 | 0.174869766 | YNL011C   |
| YIR011C   | 54.8451501 | 66.651452  | 61.130978  | 47.4211709 | 57.9894116 | 59.976479   | -0.144584234 | 5.86127581 | 0.188751737 | STS1      |
| YGL117W   | 7.16801122 | 8.1155913  | 7.14203505 | 7.68672346 | 6.05956773 | 6.52058598  | -0.144682472 | 2.85888246 | 0.410592718 | YGL117W   |
| YMR059W   | 4.14297896 | 5.06504989 | 4.84205766 | 4.67116272 | 3.90939854 | 4.13185646  | -0.144870591 | 2.20079125 | 0.472554341 | SEN15     |
| YNL284C   | 63.2626312 | 75.0548302 | 70.3914133 | 61.3164018 | 63.5277262 | 64.0437752  | -0.144970905 | 6.05324446 | 0.111412867 | MRPL10    |
| YHR052W   | 79.2426929 | 114.539196 | 90.6675298 | 74.6794749 | 88.0266237 | 94.7098974  | -0.145050056 | 6.4991524  | 0.256553813 | CIC1      |
| YPR184W   | 73.7844825 | 59.3416641 | 69.4230018 | 63.0311324 | 60.3350507 | 59.6536777  | -0.14512558  | 6.00846827 | 0.13171816  | GDB1      |
| YEL038W   | 91.6058682 | 75.4001745 | 80.9834144 | 79.0549944 | 73.275892  | 73.275892   | -0.145625367 | 6.2998267  | 0.118711901 | UTR4      |
| YMR024W   | 67.2083254 | 75.9757484 | 69.8466818 | 55.8174381 | 67.567438  | 69.3377163  | -0.14574491  | 6.08216075 | 0.148965893 | MRPL3     |
| YGR075C   | 13.020791  | 18.5910354 | 15.615636  | 8.92842494 | 16.6149438 | 17.2375887  | -0.145781005 | 3.91855769 | 0.523350326 | PRP38     |
| YGR277C   | 36.8264797 | 48.7511052 | 42.0048502 | 40.2074766 | 38.246949  | 36.9284672  | -0.146048489 | 5.34510726 | 0.198623892 | CAB4      |
| YLO030W   | 646.107434 | 491.655184 | 609.736111 | 534.70031  | 527.443019 | 516.93398   | -0.146096529 | 9.11514099 | 0.176183273 | GAS5      |
| YOR327C   | 13.8756915 | 18.3608059 | 13.6182872 | 15.196061  | 11.663039  | 14.5906181  | -0.146253909 | 3.87794002 | 0.385092288 | SNC2      |
| YMR204C   | 18.3474783 | 17.8427894 | 16.8261504 | 16.851663  | 17.0058836 | 14.0095758  | -0.146367005 | 4.08258524 | 0.278819123 | INP1      |
| YDR068W   | 20.7148948 | 24.8647904 | 22.5760939 | 24.0653573 | 19.0908962 | 18.3996733  | -0.146374176 | 4.44446115 | 0.288424298 | DOS2      |
| YML050W   | 10.0615203 | 13.3533134 | 11.2577841 | 9.9927405  | 10.4902194 | 10.9106835  | -0.146419362 | 3.47895887 | 0.370933279 | AIM32     |
| YOR040W   | 29.5269453 | 26.8217415 | 32.1996835 | 23.3558136 | 26.77938   | 29.8913991  | -0.146637556 | 4.81805741 | 0.2397963   | GLO4      |
| YJR100C   | 24.0029734 | 31.4263323 | 22.2734653 | 26.5487603 | 22.2835717 | 21.3694452  | -0.146646819 | 4.63270192 | 0.320429873 | AIM25     |
| YMR030W   | 10.7191361 | 11.799262  | 10.8946297 | 10.3475124 | 9.44771313 | 10.3942014  | -0.146740504 | 3.4241627  | 0.332011846 | RSF1      |
| YBR013C   | 7.03648808 | 6.79177145 | 6.23414924 | 6.85892247 | 5.21253138 | 6.00410393  | -0.146766483 | 2.69775807 | 0.432246395 | YBR013C   |
| YIL093C   | 22.1616494 | 19.5695109 | 21.4866309 | 17.0290489 | 20.1985591 | 19.8845592  | -0.146833466 | 4.33387512 | 0.247734285 | RSM25     |
| YGR074W   | 25.4497279 | 27.3973153 | 23.4839797 | 20.6950247 | 24.6292108 | 23.6936144  | -0.146840113 | 4.60571652 | 0.229652249 | SMD1      |
| YCL059C   | 57.7386592 | 63.8311401 | 61.3730809 | 52.9201346 | 55.2528326 | 57.1358277  | -0.147153844 | 5.86232433 | 0.094629814 | KRR1      |
| YDR108W   | 44.8493913 | 54.9673028 | 50.7810797 | 42.9273941 | 47.173409  | 46.0314634  | -0.147252964 | 5.58277759 | 0.14511123  | TRS85     |
| YAL027W   | 7.43105751 | 9.6696407  | 8.65517807 | 7.92323803 | 8.14458028 | 7.23074881  | -0.147289228 | 3.05577972 | 0.397613151 | SAW1      |
| YNR056C   | 8.48324264 | 6.67665668 | 8.35254947 | 5.67634963 | 7.23238729 | 8.32827319  | -0.147389996 | 2.91928189 | 0.454890606 | BIO5      |
| YAR030C   | 1.84132398 | 2.35985279 | 2.36050311 | 2.66078889 | 1.56375941 | 1.67856669  | -0.14758183  | 1.14783321 | 0.604705937 | YAR030C   |
| YOR283W   | 33.406878  | 47.1970558 | 37.0417411 | 39.5570615 | 35.51037   | 31.1826043  | -0.147607851 | 5.22805167 | 0.274590547 | YOR283W   |
| YNL200C   | 45.9015765 | 42.8802519 | 48.3600509 | 42.9273941 | 39.0288287 | 41.7704864  | -0.147690888 | 5.44648763 | 0.120143401 | YNL200C   |
| YPL122C   | 46.6249537 | 57.4422704 | 48.6021538 | 40.798763  | 47.7598188 | 49.3885968  | -0.147944108 | 5.60197444 | 0.180868793 | TFB2      |
| YNL189W   | 331.96441  | 334.293293 | 323.933658 | 295.465824 | 300.893374 | 297.299985  | -0.147996367 | 8.2950957  | 0.085423271 | SRP1      |
| YNL119W   | 34.9851557 | 54.5644011 | 44.4258791 | 34.2354837 | 42.5472874 | 44.2883365  | -0.148004391 | 5.41465176 | 0.317185351 | NC52      |
| YLR408C   | 4.60330996 | 6.04352544 | 4.05522329 | 4.90767729 | 4.56096496 | 3.80905518  | -0.148010698 | 2.26364487 | 0.511028925 | BLS1      |
| YPL208W   | 74.7709061 | 82.3646181 | 74.567688  | 69.7126689 | 71.6723065 | 67.7882701  | -0.148032429 | 6.2019314  | 0.081341576 | RKM1      |
| YDR209C   | 34.5248247 | 53.9312699 | 33.168095  | 33.9989692 | 35.51037   | 40.3501608  | -0.148143213 | 5.27557798 | 0.358982372 | YDR209C   |
| YHR174W   | 227.127971 | 17130.8621 | 21033.2932 | 19872.1905 | 18107.096  | 16954.1046  | -0.14820881  | 14.2364503 | 0.202538538 | ENO2      |
| YEL050C   | 84.8324264 | 86.5087499 | 81.1649916 | 77.3402637 | 74.1482589 | 76.3102241  | -0.14844391  | 6.32521721 | 0.06755383  | RML2      |
| YBR253W   | 7.03648808 | 8.97895208 | 7.62624082 | 8.10062967 | 6.71113415 | 6.52058598  | -0.148487444 | 2.93366535 | 0.408200771 | SRB6      |
| YIL116W   | 169.072999 | 179.866829 | 165.053641 | 164.318496 | 152.922639 | 146.422663  | -0.148579882 | 7.34946443 | 0.092965651 | HIS5      |
| YLR285W   | 44.2575372 | 60.3201396 | 48.117948  | 41.6856926 | 45.4793363 | 50.679802   | -0.1491956   | 5.60190294 | 0.221692136 | NNT1      |
| YCL030C   | 895.014979 | 749.915171 | 832.591815 | 813.077956 | 733.533479 | 687.114818  | -0.149348032 | 9.61715812 | 0.149808758 | HIS4      |
| YKL035W   | 680.763782 | 545.586454 | 623.233347 | 556.755293 | 542.624517 | 568.130264  | -0.149405407 | 9.19547664 | 0.137839946 | UGP1      |
| YJR145C   | 1799.56539 | 1938.64785 | 1744.23022 | 1635.6165  | 1616.99239 | 1690.31666  | -0.149465651 | 10.7629597 | 0.106496177 | RPS4A     |

|           |            |            |            |            |            |            |              |            |             |           |
|-----------|------------|------------|------------|------------|------------|------------|--------------|------------|-------------|-----------|
| YJL131C   | 15.9143001 | 17.785232  | 16.039316  | 15.7873474 | 14.8557144 | 14.2032566 | -0.149534421 | 3.99115579 | 0.262208837 | AIM23     |
| YGR214W   | 1945.1615  | 1707.55494 | 1951.04661 | 1511.50548 | 1664.75221 | 1875.47547 | -0.149621178 | 10.794435  | 0.161769537 | RPS0A     |
| YGL248W   | 37.6156185 | 42.4197928 | 36.5575354 | 38.8475178 | 33.8162973 | 32.4092491 | -0.149722574 | 5.21299606 | 0.169249262 | PDE1      |
| YGL123W   | 4078.53263 | 3915.57135 | 4262.94757 | 3637.29841 | 3624.27307 | 3787.16925 | -0.149728745 | 11.9234848 | 0.101583263 | RPS2      |
| YBL087C   | 855.952606 | 788.01816  | 864.125716 | 828.628789 | 731.057526 | 700.930713 | -0.149799861 | 9.63466461 | 0.129501449 | RPL23A    |
| YAL063C   | 42.8107826 | 36.8367265 | 45.9390221 | 35.4771852 | 39.3546119 | 38.3487928 | -0.149888486 | 5.3186167  | 0.164096156 | FLO9      |
| YCL031C   | 57.6071361 | 68.4932883 | 60.2230922 | 52.3288482 | 55.3831459 | 60.3638405 | -0.149897493 | 5.88758563 | 0.127031309 | RRP7      |
| YDL025C   | 66.4849481 | 69.9322229 | 65.4888299 | 61.6711736 | 60.7911472 | 59.5245572 | -0.149952149 | 6.00261425 | 0.072413303 | RTK1      |
| YML041C   | 11.8370828 | 17.4974451 | 11.3183098 | 11.3526993 | 12.575232  | 12.7829309 | -0.150027196 | 3.70458289 | 0.423511215 | VPS71     |
| YPL115C   | 122.119237 | 126.33846  | 127.890848 | 111.398362 | 111.548172 | 116.273023 | -0.150038953 | 6.89956645 | 0.062245665 | BEM3      |
| YGL235W   | 2.95927069 | 1.84183632 | 3.2078632  | 0.94605827 | 2.73657898 | 3.55081415 | -0.150201007 | 1.40103058 | 0.714370511 | YGL235W   |
| YGR128C   | 124.223607 | 156.210743 | 134.124997 | 111.280104 | 129.792031 | 132.671329 | -0.150236079 | 7.03914525 | 0.148825549 | UTP8      |
| YLL033W   | 10.1930435 | 9.38185378 | 9.98674393 | 7.15456568 | 8.99161663 | 10.5233219 | -0.15026245  | 3.24538094 | 0.415046503 | IRC19     |
| YJL195C   | 5.65549509 | 7.19467314 | 6.59730357 | 5.49896371 | 6.45050758 | 5.61674238 | -0.151105628 | 2.65569457 | 0.422745804 | YJL195C   |
| YPR062W   | 95.4200393 | 90.2499799 | 102.348994 | 91.2354946 | 84.4430084 | 83.6055332 | -0.151154764 | 6.51331649 | 0.080730076 | FCY1      |
| YGL036W   | 121.658906 | 116.381033 | 109.733132 | 98.271803  | 106.987207 | 107.88019  | -0.151427365 | 6.78489353 | 0.076124101 | YGL036W   |
| YCL028W   | 198.468421 | 217.106457 | 192.592844 | 153.143183 | 185.631274 | 208.916993 | -0.151437846 | 7.59067834 | 0.180104549 | RN01      |
| YER161C   | 32.2231697 | 33.9012998 | 35.9522782 | 32.1068526 | 28.6689226 | 31.118044  | -0.151463619 | 5.02087186 | 0.146497107 | SPT2      |
| YHR213W   | 5.45821038 | 4.31680389 | 4.23680046 | 5.08506321 | 3.84424189 | 3.61537441 | -0.151570104 | 2.18651959 | 0.487750397 | YHR213W   |
| YOR094W   | 19.2681403 | 18.0154615 | 18.8234992 | 17.502078  | 18.3741731 | 14.5906181 | -0.151870828 | 4.16094406 | 0.26278417  | ARF3      |
| YBR154C   | 48.9266087 | 56.3486801 | 51.2652855 | 47.4802995 | 49.909988  | 43.5781737 | -0.151891148 | 5.63589015 | 0.117996526 | RPB5      |
| YDR286C   | 5.72125667 | 7.30978791 | 4.29732618 | 4.73029136 | 5.8640978  | 5.03570007 | -0.152110827 | 2.4912264  | 0.509348063 | YDR286C   |
| YPL225W   | 31.7628387 | 58.132959  | 36.9812154 | 46.1794694 | 40.5274315 | 27.5026696 | -0.152156719 | 5.33532762 | 0.463413546 | YPL225W   |
| YML095C   | 8.54900421 | 9.49698655 | 8.47360091 | 7.80498075 | 8.07942364 | 8.0054719  | -0.152196304 | 3.09283615 | 0.335450586 | RAD10     |
| YKL208W   | 9.99575877 | 11.9143787 | 10.834104  | 10.3475124 | 8.86130335 | 10.2650809 | -0.152551762 | 3.39364859 | 0.338929466 | CBT1      |
| YPR060C   | 44.1917756 | 62.5073203 | 44.0627247 | 43.4595519 | 44.1110468 | 48.1619519 | -0.152749658 | 5.58196071 | 0.23946819  | AR07      |
| YGR275W   | 20.9121795 | 20.6631013 | 17.6129848 | 21.7593403 | 17.2665102 | 14.1386963 | -0.152782891 | 4.23789738 | 0.350655326 | RTT102    |
| YOR107W   | 35.9715793 | 42.9378093 | 41.2180159 | 29.8008356 | 37.5302259 | 40.8666428 | -0.15283483  | 5.25475927 | 0.223768483 | RGS2      |
| YGR008C   | 6.57615709 | 8.80627993 | 5.99204636 | 7.92323803 | 6.25503766 | 5.03570007 | -0.1529678   | 2.78968192 | 0.495475664 | STF2      |
| YMR146C   | 341.762884 | 402.211007 | 349.959718 | 305.635951 | 328.780417 | 349.593793 | -0.152972478 | 8.43654403 | 0.122849402 | TIF34     |
| YDL104C   | 12.56046   | 14.2742315 | 15.0709045 | 12.1213716 | 12.5100753 | 13.1057322 | -0.152998024 | 3.74490596 | 0.287133694 | QR17      |
| YCL024W   | 67.6028949 | 63.8311401 | 69.9072075 | 58.1234551 | 60.2698941 | 62.6880098 | -0.1530329   | 5.99681268 | 0.074964368 | KCC4      |
| YML021C   | 38.7993268 | 35.6280214 | 39.9469757 | 31.1016657 | 35.3800567 | 36.4119851 | -0.153039096 | 5.18292826 | 0.144173049 | UNG1      |
| YCR096C   | 0.32880785 | 0.92091816 | 0.84736009 | 1.41908741 | 0          | 0.4519218  | -0.153107952 | -0.3156492 | 0.83913914  | HMRA2     |
| YHL036W   | 39.3254194 | 30.5629715 | 34.7417637 | 30.2738647 | 29.7765855 | 33.9586953 | -0.153173435 | 5.05371611 | 0.192858374 | MUP3      |
| YJL156C   | 91.1455372 | 100.38008  | 96.5990504 | 82.1888124 | 88.8085034 | 88.1893114 | -0.153391018 | 6.51334249 | 0.069424218 | SSY5      |
| YGL238W   | 364.976718 | 354.898837 | 377.438395 | 310.661885 | 337.05531  | 338.74767  | -0.153695429 | 8.44052848 | 0.086371265 | CSE1      |
| YDR492W   | 155.854923 | 135.317412 | 168.32203  | 116.424296 | 143.735553 | 152.749569 | -0.154391388 | 7.18491711 | 0.1723393   | IZH1      |
| YLR258W   | 243.843905 | 198.227634 | 217.892595 | 218.421204 | 190.322552 | 184.061293 | -0.154400836 | 7.70678709 | 0.139544018 | GSY2      |
| YNL248C   | 163.022934 | 195.867782 | 165.779949 | 150.718908 | 163.803799 | 157.010546 | -0.154456667 | 7.3765475  | 0.107984284 | RPA49     |
| YJL183W   | 187.486239 | 170.542532 | 184.966603 | 157.932603 | 163.282546 | 166.565464 | -0.154610541 | 7.42554828 | 0.076207849 | MNN11     |
| YML125C   | 178.674188 | 181.420878 | 170.622007 | 165.382812 | 154.747025 | 156.558624 | -0.154764892 | 7.39261995 | 0.069769581 | PGA3      |
| YMR289W   | 38.470519  | 39.5419236 | 38.9180385 | 35.181542  | 35.9664665 | 33.8941351 | -0.154849099 | 5.21436638 | 0.099657945 | ABZ2      |
| YDL121C   | 42.1531669 | 52.7225648 | 37.0417411 | 50.9688894 | 36.1619365 | 31.3117248 | -0.154868704 | 5.38880672 | 0.351564217 | YDL121C   |
| YMR012W   | 722.390856 | 712.675543 | 674.377581 | 624.102816 | 636.580395 | 633.981726 | -0.154915077 | 9.38257474 | 0.082200684 | CLU1      |
| YEL053C   | 79.5057392 | 77.7024699 | 81.1649916 | 66.9336228 | 71.0207401 | 76.1811036 | -0.1550318   | 6.23916254 | 0.069620012 | MAK10     |
| YNL177C   | 40.0487967 | 44.1465144 | 39.46277   | 36.7188867 | 37.6605392 | 36.7347864 | -0.155044162 | 5.2951011  | 0.107011907 | MRPL22    |
| YLL042C   | 2.10437027 | 2.93542664 | 2.05787451 | 2.42427432 | 1.88954263 | 2.06592823 | -0.155201795 | 1.25189401 | 0.574095019 | ATG10     |
| YER092W   | 10.3245666 | 13.4684281 | 11.2577841 | 9.81535457 | 11.2069425 | 10.5233219 | -0.155265333 | 3.49002879 | 0.339998701 | IES5      |
| YML128C   | 65.2354783 | 61.2410578 | 60.7678237 | 60.8433726 | 55.7740858 | 51.3899648 | -0.155348464 | 5.89093695 | 0.091871569 | MSC1      |
| YER046W-A | 2.30165498 | 2.41741018 | 1.51314302 | 1.77385926 | 1.04250628 | 2.77609106 | -0.155524461 | 1.06740226 | 0.678119668 | YER046W-A |
| YDL006W   | 22.1616494 | 27.7426596 | 23.4839797 | 24.0062287 | 21.1107521 | 20.7884028 | -0.155641304 | 4.54636556 | 0.226236812 | PTC1      |
| YKL044W   | 2.0386087  | 1.43893463 | 1.08946297 | 1.53734469 | 0.84703635 | 1.67856669 | -0.155660103 | 0.64115887 | 0.704668675 | YKL044W   |
| YDL157C   | 25.0551585 | 35.5129066 | 26.7523686 | 27.080918  | 27.5612597 | 23.8227349 | -0.155675734 | 4.79626962 | 0.267673416 | YDL157C   |
| YKL009W   | 83.056864  | 110.337507 | 87.7622952 | 85.6182736 | 83.7262853 | 83.1536114 | -0.15575266  | 6.4772937  | 0.137997143 | MRT4      |
| YIL034C   | 176.964387 | 155.807842 | 163.722075 | 134.10376  | 152.14076  | 159.205594 | -0.156534193 | 7.29552467 | 0.097598118 | CAP2      |
| YOR278W   | 24.9893969 | 32.4623652 | 25.2392256 | 27.3174326 | 23.9124877 | 22.9834516 | -0.156534389 | 4.71729047 | 0.239716036 | HEM4      |
| YGL243W   | 20.6491333 | 27.2822006 | 23.4234539 | 21.463697  | 22.4790416 | 20.1428003 | -0.156861872 | 4.50589308 | 0.23376012  | TAD1      |
| YBR278W   | 8.08867322 | 8.23070608 | 9.80516677 | 8.98755359 | 7.75364043 | 6.6497065  | -0.157552407 | 3.06870002 | 0.378068168 | DPB3      |
| YEL017W   | 94.8939468 | 71.1984854 | 87.3386151 | 78.5228366 | 72.7148128 | 75.793742  | -0.157685733 | 6.32531086 | 0.129772011 | GTT3      |
| YLR339C   | 1234.67349 | 901.291094 | 1198.4698  | 774.526082 | 971.420379 | 1243.23687 | -0.157694136 | 10.0416821 | 0.316592827 | YLR339C   |
| YOR171C   | 70.1675961 | 88.8110453 | 80.3176315 | 69.7717976 | 73.040596  | 71.8555663 | -0.157706581 | 6.24425163 | 0.10239002  | LCB4      |
| YLR132C   | 9.60118935 | 12.3748378 | 9.26043528 | 9.04668223 | 8.14458028 | 10.8461232 | -0.157914294 | 3.3243917  | 0.39337478  | USB1      |
| YGR118W   | 395.950418 | 574.365146 | 392.811928 | 490.2947   | 390.157974 | 341.33008  | -0.15794189  | 8.7515505  | 0.306894141 | RPS23A    |
| YIL135C   | 82.6622946 | 77.2420109 | 80.5597344 | 65.5145353 | 70.5646436 | 79.4736767 | -0.158007267 | 6.25016542 | 0.086208629 | VHS2      |
| YLR368W   | 38.93085   | 44.4343013 | 38.3127813 | 40.7396343 | 31.9919114 | 36.2828646 | -0.158120186 | 5.27047875 | 0.162171235 | MDM30     |
| YKL144C   | 20.9779411 | 28.3757909 | 20.2155907 | 23.0601704 | 20.0682458 | 19.2389567 | -0.158257068 | 4.46896132 | 0.290657236 | RPC25     |
| YDL129C   | 30.184561  | 45.2976621 | 38.0101527 | 38.2562314 | 31.7964414 | 31.6990863 | -0.158270129 | 5.17171106 | 0.25998113  | OPY1      |
| YPL114W   | 3.09079383 | 1.84183632 | 2.42102883 | 1.8329879  | 2.08501255 | 2.64697055 | -0.158523327 | 1.28125653 | 0.599381599 | YPL114W   |
| YPL178W   | 40.5748892 | 58.3631885 | 41.399593  | 43.8143237 | 42.612444  | 39.3817569 | -0.158622371 | 5.47630261 | 0.230227777 | CBC2      |
| YGR156W   | 52.6750183 | 44.4343013 | 48.9047824 | 40.798763  | 46.1960594 | 43.7718544 | -0.158706359 | 5.53104963 | 0.110781587 | PTI1      |
| YIR020C   | 1.31523142 | 0.80580339 | 1.21051442 | 0.65041506 | 1.04250628 | 1.29120515 | -0.158783131 | 0.22405944 | 0.68601282  | YIR020C   |
| YHR038W   | 9.9299972  | 12.1446083 | 13.1340814 | 11.7665998 | 8.92645999 | 10.8461232 | -0.158870368 | 3.49469758 | 0.364632839 | RRF1      |

|           |            |            |            |            |            |            |              |            |             |           |
|-----------|------------|------------|------------|------------|------------|------------|--------------|------------|-------------|-----------|
| YMR205C   | 1805.48393 | 1352.19565 | 1751.25121 | 1463.78866 | 1466.48055 | 1466.5508  | -0.158914266 | 10.5990427 | 0.161271123 | PFK2      |
| YER020W   | 76.8095148 | 65.5003043 | 69.9072075 | 65.1597635 | 61.7684969 | 63.0108111 | -0.158962412 | 6.06920576 | 0.075453697 | GA2       |
| YAL037W   | 9.66695092 | 10.5330015 | 9.80516677 | 9.04668223 | 9.2522432  | 8.58651422 | -0.159155023 | 3.26503055 | 0.29535915  | YAL037W   |
| YOR224C   | 159.07724  | 147.116676 | 146.593296 | 139.070566 | 133.245333 | 133.05869  | -0.159223307 | 7.1614038  | 0.056594515 | RPB8      |
| YDL041W   | 0.59185414 | 1.5540494  | 1.39209158 | 0.29564321 | 1.2379762  | 1.67856669 | -0.159226078 | 0.32109195 | 0.820032933 | YDL041W   |
| YDR179W-A | 14.0072146 | 20.4328717 | 15.0709045 | 12.6535294 | 16.4194739 | 15.3653412 | -0.159248537 | 3.98157044 | 0.362502305 | YDR179W-A |
| YJR053W   | 29.0666143 | 24.6921182 | 24.1497626 | 21.2863111 | 24.954994  | 23.4999336 | -0.159338328 | 4.62738111 | 0.196370219 | BFA1      |
| YPR092W   | 0.65761571 | 0.23022954 | 0.54473149 | 0.17738593 | 0.4560965  | 0.64560257 | -0.159557709 | -0.8149603 | 0.895164974 | YPR092W   |
| YHR009C   | 236.873178 | 215.322178 | 217.589966 | 221.909793 | 189.019419 | 188.515951 | -0.159707307 | 7.7256795  | 0.100478038 | TDA3      |
| YNL229C   | 55.2397195 | 67.2270258 | 54.4731487 | 51.5010472 | 52.5814103 | 54.4242969 | -0.159712816 | 5.80861796 | 0.113306447 | URE2      |
| YIR008C   | 50.2418401 | 56.5789096 | 49.7521425 | 49.4315447 | 46.3915293 | 44.2883365 | -0.160370101 | 5.63199041 | 0.092751599 | PRI1      |
| YGR073C   | 8.08867322 | 9.55452593 | 9.0183324  | 6.85892247 | 6.97176072 | 10.0714001 | -0.160533706 | 3.09678524 | 0.410173234 | YGR073C   |
| YPL139C   | 43.8629678 | 56.7515817 | 43.5179933 | 42.276979  | 44.1110468 | 42.6743301 | -0.16054873  | 5.51344159 | 0.154654585 | UME1      |
| YBR270C   | 18.2159551 | 23.0805114 | 22.8181967 | 16.6151484 | 20.7198122 | 20.1428003 | -0.160577526 | 4.35039669 | 0.259613465 | BIT2      |
| YBR148W   | 3.28807854 | 3.62611526 | 2.36050311 | 2.66078889 | 2.99720554 | 2.64697055 | -0.160791747 | 1.61137162 | 0.522845178 | YSW1      |
| YJR051W   | 82.9253409 | 85.4151596 | 79.6518486 | 77.1628778 | 71.21621   | 73.4050125 | -0.160882428 | 6.29336498 | 0.051734066 | OSM1      |
| YPR017C   | 9.00933521 | 10.4178867 | 7.44466366 | 8.21888124 | 8.14458028 | 7.68267061 | -0.160974912 | 3.10770705 | 0.371658846 | DSS4      |
| YDR539W   | 94.6309005 | 89.0988322 | 93.6938158 | 88.2199339 | 77.7970309 | 81.9915267 | -0.161008763 | 6.45456918 | 0.057995389 | FDC1      |
| YPL245W   | 93.3814306 | 100.32252  | 100.230594 | 89.7572786 | 84.8991049 | 88.2538717 | -0.161064056 | 6.53832136 | 0.050511935 | YPL245W   |
| YEL021W   | 54.253296  | 53.1254665 | 53.9889429 | 50.9097608 | 47.5643489 | 45.7732224 | -0.161080427 | 5.67437322 | 0.069505672 | URA3      |
| YHR004C   | 36.1031024 | 47.2546132 | 37.0417411 | 38.2562314 | 35.70584   | 33.7650145 | -0.161202983 | 5.25456594 | 0.176869414 | NEM1      |
| YLR291C   | 160.721279 | 173.362844 | 159.364223 | 149.35895  | 138.848805 | 153.07237  | -0.161278545 | 7.28471518 | 0.062381282 | GCD7      |
| YGR023W   | 20.1888023 | 21.4689047 | 19.4287564 | 15.8464761 | 18.1135465 | 20.7238426 | -0.16145734  | 4.27920803 | 0.238255416 | MTL1      |
| YDL100C   | 243.909666 | 261.828545 | 215.41104  | 215.937801 | 221.728054 | 207.109305 | -0.161550257 | 7.83154684 | 0.095044074 | GET3      |
| YMR215W   | 448.230867 | 358.812739 | 451.158723 | 324.084087 | 379.211658 | 421.57848  | -0.161601761 | 8.63400229 | 0.175494655 | GAS3      |
| YOR166C   | 42.8765442 | 55.3702045 | 42.878519  | 41.8630785 | 42.6776007 | 42.3515288 | -0.161737408 | 5.48970444 | 0.144470676 | SWT1      |
| YMR148W   | 24.0687349 | 19.3392814 | 23.9681854 | 18.0342358 | 20.394029  | 21.7568067 | -0.162468797 | 4.41734399 | 0.225769171 | OSW5      |
| YJL043W   | 2.56470126 | 2.87786926 | 3.93417185 | 3.42946124 | 2.73657898 | 2.19504875 | -0.162690078 | 1.62886734 | 0.553088611 | YJL043W   |
| YHR189W   | 13.8756915 | 13.0655264 | 14.8288016 | 11.7074711 | 11.7933522 | 13.8158951 | -0.162891521 | 3.73365645 | 0.263231492 | PTH1      |
| YGL152C   | 5.39244881 | 6.2161976  | 7.80781798 | 6.38589334 | 4.69127824 | 6.26234495 | -0.163017884 | 2.64742858 | 0.448462484 | YGL152C   |
| YPL265W   | 164.206642 | 134.856953 | 154.098485 | 142.500027 | 129.987501 | 132.090286 | -0.16302945  | 7.16063814 | 0.083138723 | DIP5      |
| YDL244W   | 1.51251613 | 1.09359032 | 1.63419446 | 1.24170148 | 1.17281956 | 1.3557654  | -0.163117399 | 0.54236225 | 0.661932385 | THI13     |
| YPL191C   | 10.9821823 | 14.2166741 | 11.1972583 | 12.712658  | 10.3599061 | 9.42579756 | -0.163218182 | 3.54035954 | 0.356699469 | YPL191C   |
| YDR466W   | 66.6164713 | 70.7380263 | 74.6282137 | 54.2800934 | 67.4371247 | 67.7237099 | -0.163283292 | 6.06662423 | 0.109179183 | PKH3      |
| YDL005C   | 41.2982665 | 47.5999575 | 42.1259017 | 37.1919158 | 41.3093112 | 38.6070338 | -0.163319335 | 5.3746841  | 0.103918145 | MED2      |
| YNL213C   | 15.2566844 | 17.1521008 | 15.3130074 | 16.4377625 | 14.0086781 | 12.1373284 | -0.16332668  | 3.92568317 | 0.280837019 | RRG9      |
| YBR087W   | 47.4140926 | 66.0758781 | 55.1994574 | 52.5062341 | 48.5416985 | 49.6468378 | -0.163671832 | 5.73850964 | 0.154994481 | RFC5      |
| YGR050C   | 6.97072651 | 4.2592465  | 5.8104692  | 4.84854864 | 5.60347123 | 4.71289878 | -0.163758672 | 2.4526366  | 0.452707276 | YGR050C   |
| YIL076W   | 89.1726901 | 138.02261  | 99.927965  | 97.7396452 | 99.8851326 | 94.5162166 | -0.16378928  | 6.69176273 | 0.209196628 | SEC28     |
| YER074W-A | 12.2316522 | 14.3317889 | 11.1367326 | 12.4170148 | 11.467569  | 9.74859885 | -0.164457959 | 3.58867063 | 0.319515539 | YOS1      |
| YCR020C-A | 10.7191361 | 10.2452146 | 7.02098361 | 8.27800988 | 8.60067678 | 8.07003216 | -0.164684358 | 3.16085411 | 0.386286594 | MAK31     |
| YOR155C   | 72.7980589 | 79.947208  | 67.9098587 | 69.2987684 | 65.026329  | 62.494329  | -0.164870282 | 6.1235059  | 0.072573584 | ISN1      |
| YIL094C   | 206.622856 | 237.999788 | 203.124319 | 201.569541 | 188.823949 | 187.418427 | -0.164905119 | 7.67529319 | 0.082039862 | LYS12     |
| YML015C   | 27.6198598 | 30.332742  | 28.8102431 | 23.7105854 | 25.1504639 | 28.600194  | -0.165083695 | 4.7813188  | 0.152666011 | TAF11     |
| YDR096W   | 74.2448135 | 71.1984854 | 75.2334709 | 59.6607998 | 65.938522  | 71.274524  | -0.165095879 | 6.12327919 | 0.069487241 | GIS1      |
| YOL117W   | 18.1501936 | 20.2601996 | 18.2787677 | 18.1524931 | 17.3316668 | 15.0425399 | -0.165913088 | 4.17069436 | 0.21439842  | RR12      |
| YPL250W-A | 1.05218513 | 1.32381986 | 0.3026286  | 0          | 1.56375941 | 0.83928334 | -0.166033239 | -0.0568828 | 0.881539848 | YPL250W-A |
| YER141W   | 235.426424 | 192.011437 | 219.163635 | 202.574728 | 189.475516 | 183.996733 | -0.16631536  | 7.67166827 | 0.091096668 | COX15     |
| YNR046W   | 44.9809145 | 39.7145957 | 37.8891012 | 31.1016657 | 36.8786595 | 41.2540044 | -0.166643245 | 5.27578776 | 0.161576303 | TRM112    |
| YGL045W   | 17.3610547 | 18.0730189 | 17.3103561 | 17.3103353 | 14.3344613 | 14.9779797 | -0.166949199 | 4.06635843 | 0.218386601 | RIM8      |
| YGR052W   | 4.80059467 | 4.31680389 | 3.99469757 | 4.43464815 | 3.32298876 | 3.87361544 | -0.167094392 | 2.08804389 | 0.437334844 | FMP48     |
| YPL127C   | 144.543933 | 145.850414 | 146.169616 | 140.548782 | 128.293429 | 119.823837 | -0.167362875 | 7.10515077 | 0.055166771 | HHO1      |
| YOR377W   | 62.8023002 | 63.1980089 | 61.4941323 | 53.6888069 | 59.8137976 | 53.455893  | -0.167715039 | 5.88754519 | 0.056179183 | ATF1      |
| YER032W   | 83.1883871 | 80.6378966 | 85.2807406 | 69.2396398 | 78.7092239 | 73.8569343 | -0.167820465 | 6.29656858 | 0.048975525 | FIR1      |
| YDR314C   | 14.9278766 | 13.1230838 | 13.43671   | 13.1265585 | 12.8358585 | 10.9106835 | -0.16782343  | 3.72075051 | 0.250986751 | RAD34     |
| YLR361C-A | 4.93211781 | 5.35283682 | 4.11574901 | 4.31639087 | 5.4080131  | 3.09889235 | -0.167946096 | 2.22175758 | 0.490952807 | YLR361C-A |
| YNL155W   | 29.6584685 | 34.9373328 | 34.0759808 | 29.2686778 | 29.9068988 | 28.7293145 | -0.167955242 | 4.96518531 | 0.117769261 | CUZ1      |
| YHR068W   | 391.610155 | 400.772073 | 375.562098 | 390.899452 | 338.944853 | 309.501873 | -0.168168714 | 8.52366642 | 0.097963664 | DYS1      |
| YKL152C   | 6170.86853 | 5573.51183 | 6019.58556 | 5833.80921 | 5137.2103  | 4837.952   | -0.168198325 | 12.4500826 | 0.097907238 | GPM1      |
| YNL068C   | 82.7280562 | 88.92616   | 89.093861  | 66.0466931 | 81.054863  | 85.0904191 | -0.168275147 | 6.36242994 | 0.094818746 | FKH2      |
| YBR116C   | 3.94569425 | 3.74123003 | 4.05522329 | 3.25207531 | 3.90939854 | 3.29257312 | -0.168452323 | 1.93404427 | 0.432181623 | YBR116C   |
| YLR036C   | 11.8370828 | 19.3968388 | 13.43671   | 10.406641  | 13.4222683 | 16.0109438 | -0.168499078 | 3.83047697 | 0.423779211 | YLR036C   |
| YGR220C   | 41.7585975 | 48.2906461 | 41.9443245 | 40.5622484 | 38.5075756 | 38.4133531 | -0.168508897 | 5.38275095 | 0.089212362 | MRPL9     |
| YDR361C   | 52.6750183 | 66.9967963 | 55.7441889 | 55.4626662 | 53.6890732 | 46.935307  | -0.168965159 | 5.79192723 | 0.122242012 | BCP1      |
| YDR098C   | 60.8952146 | 102.912605 | 62.8256982 | 71.3091423 | 66.9810282 | 63.3336124 | -0.169280595 | 6.16095598 | 0.288719555 | GRX3      |
| YLR301W   | 119.488774 | 175.032008 | 128.193477 | 133.571602 | 122.168704 | 120.211199 | -0.169463147 | 7.05831276 | 0.174251952 | YDR1      |
| YDR042C   | 2.30165498 | 4.37436127 | 3.02628604 | 2.9564321  | 3.19267547 | 2.51785003 | -0.169962187 | 1.67966388 | 0.55326792  | YDR042C   |
| YIL020C   | 35.708533  | 43.340711  | 36.3154325 | 36.0684716 | 33.9466106 | 32.5383697 | -0.170416148 | 5.18853906 | 0.117817706 | HIS6      |
| YBR281C   | 94.6309005 | 97.5022104 | 93.3911872 | 83.903543  | 88.7433468 | 81.0876831 | -0.170471651 | 6.49196346 | 0.038084    | DUG2      |
| YPR068C   | 22.7535035 | 23.3682984 | 21.4866309 | 18.0933645 | 21.306222  | 20.7238426 | -0.170625701 | 4.42020777 | 0.162030074 | HOS1      |
| YJR071W   | 24.5290659 | 30.1025124 | 26.44974   | 21.0497966 | 23.5867045 | 27.5026696 | -0.170808889 | 4.68197403 | 0.197639439 | YJR071W   |
| YJR048W   | 23.8714502 | 33.7861851 | 22.5155681 | 30.5695079 | 23.7821744 | 16.8502271 | -0.17089642  | 4.66701183 | 0.390764168 | CYC1      |
| YPR094W   | 2.89350912 | 4.08657435 | 2.60260599 | 3.01556074 | 2.80173562 | 2.71153081 | -0.171263178 | 1.65739295 | 0.512663699 | RDS3      |

|           |            |            |            |            |             |            |              |            |             |           |
|-----------|------------|------------|------------|------------|-------------|------------|--------------|------------|-------------|-----------|
| YIL074C   | 156.709823 | 163.923433 | 151.919559 | 143.859986 | 130.052658  | 145.64794  | -0.171546361 | 7.21744652 | 0.047287721 | SER33     |
| YGR062C   | 36.3661487 | 32.0594635 | 36.6785868 | 30.6877652 | 30.0372121  | 32.5383697 | -0.171691553 | 5.05229719 | 0.101408796 | COX18     |
| YOR369C   | 1225.66416 | 1397.20552 | 1292.52677 | 1239.04069 | 1085.31419  | 1151.49675 | -0.171794084 | 10.2668152 | 0.079582922 | RPS12     |
| YOR266W   | 17.7556241 | 18.8788223 | 15.5551102 | 15.0778037 | 16.8755703  | 14.3969374 | -0.171822506 | 4.04887469 | 0.221458247 | PNT1      |
| YHR046C   | 27.4883366 | 30.5629715 | 25.1786999 | 28.6182627 | 23.7821744  | 21.4340054 | -0.171852542 | 4.71841961 | 0.193261451 | INM1      |
| YBR132C   | 63.4599159 | 44.4343013 | 53.1415829 | 48.0124573 | 46.8476258  | 47.9037109 | -0.172334267 | 5.66491699 | 0.142243693 | AGP2      |
| YGL176C   | 39.6542272 | 42.1320059 | 40.3706558 | 34.6493842 | 38.5727322  | 35.2499005 | -0.172338608 | 5.26930813 | 0.07467436  | YGL176C   |
| YNL261W   | 54.9109117 | 53.7010403 | 59.7388864 | 46.1203408 | 53.0375068  | 50.2924404 | -0.172424727 | 5.73032118 | 0.066965883 | ORC5      |
| YDL076C   | 23.3453577 | 36.7216117 | 29.1733974 | 22.1141121 | 27.1051632  | 30.0850799 | -0.172710719 | 4.81953652 | 0.290111028 | RXT3      |
| YNL214W   | 7.16801122 | 10.2452146 | 8.47360091 | 6.44502198 | 8.27489357  | 8.32827319 | -0.17277864  | 3.05137894 | 0.3735507   | PEX17     |
| YPR123C   | 6.37887237 | 6.90688622 | 3.32891464 | 6.20850741 | 5.0822181   | 3.42169363 | -0.172861155 | 2.42192916 | 0.557829862 | YPR123C   |
| YIL118W   | 75.9546144 | 83.688438  | 78.9255399 | 74.5612176 | 68.9357275  | 68.1110714 | -0.173028929 | 6.23213828 | 0.043206363 | RHO3      |
| YPR070W   | 35.3139636 | 42.4773502 | 36.7996382 | 33.1120395 | 33.1647309  | 35.4435812 | -0.173218145 | 5.17761817 | 0.102266465 | MED1      |
| YGL021W   | 144.149363 | 146.310873 | 141.024929 | 120.385915 | 130.248128  | 132.090286 | -0.17326259  | 7.08561908 | 0.037633049 | ALK1      |
| YLR459W   | 74.6393829 | 66.3636651 | 74.5071623 | 49.6680593 | 63.0064731  | 78.5052728 | -0.173283585 | 6.08494412 | 0.194350831 | GAB1      |
| YIL086C   | 0.78913885 | 0.46045908 | 0.54473149 | 0.41390049 | 0.65156642  | 0.51648206 | -0.173292415 | -0.5524391 | 0.716305674 | YIL086C   |
| YBR025C   | 795.254676 | 891.851683 | 793.189571 | 791.377745 | 724.346392  | 683.693124 | -0.173384147 | 9.60751602 | 0.078456601 | OLA1      |
| YDL235C   | 20.9121795 | 33.6710703 | 22.6971453 | 21.2271825 | 23.4563912  | 23.9518554 | -0.173388269 | 4.61317856 | 0.295716734 | YPD1      |
| YEL069C   | 3.35384011 | 3.51100049 | 4.17627473 | 2.2468884  | 3.97455518  | 3.61537441 | -0.173394715 | 1.84656959 | 0.503978743 | HXT13     |
| YLR428C   | 7.69410379 | 8.05803392 | 10.4709497 | 7.50933754 | 8.27489357  | 7.48898984 | -0.173538123 | 3.06671651 | 0.333875316 | YLR428C   |
| YBR143C   | 387.467176 | 533.154059 | 404.190763 | 413.131822 | 394.002216  | 367.476984 | -0.173698639 | 8.70298275 | 0.147784    | SUP45     |
| YDL229W   | 4336.18646 | 3558.37022 | 4346.04938 | 3416.15729 | 3716.86066  | 3718.73538 | -0.173741281 | 11.9102056 | 0.097516782 | SSB1      |
| YJR141W   | 15.5197307 | 21.2962325 | 16.2208932 | 16.5560198 | 16.7452571  | 13.7513348 | -0.174108632 | 4.07316603 | 0.277193889 | YJR141W   |
| YPR122W   | 128.629633 | 131.63374  | 126.982962 | 106.904585 | 116.695546  | 119.630157 | -0.174426312 | 6.92920781 | 0.037741834 | AXL1      |
| YBR217W   | 5.1951641  | 6.2161976  | 5.62889203 | 5.43983506 | 5.143737474 | 4.51921801 | -0.174488182 | 2.45792915 | 0.367302316 | ATG12     |
| YOL008W   | 16.9007237 | 20.0875274 | 17.3103561 | 16.5560198 | 14.3996179  | 17.1730284 | -0.174773585 | 4.10542705 | 0.207018387 | COQ10     |
| YPL203W   | 40.0487967 | 49.0964495 | 44.2443019 | 36.7188867 | 40.3319616  | 41.2540044 | -0.174840789 | 5.39531868 | 0.098429151 | TPK2      |
| YDR165W   | 105.415798 | 151.606152 | 123.47247  | 108.205415 | 112.720991  | 116.273023 | -0.174939134 | 6.90415234 | 0.129209908 | TRM82     |
| YDL193W   | 68.9838878 | 62.9677793 | 56.5310232 | 61.0798872 | 55.7089291  | 50.0341994 | -0.17499687  | 5.8910929  | 0.091419963 | NUS1      |
| YOR013W   | 13.1523142 | 12.1446083 | 15.6761617 | 11.5892138 | 11.5978823  | 13.1057322 | -0.175054468 | 3.70054757 | 0.255111684 | IRC11     |
| YDL185C-A | 2.36741655 | 2.24473802 | 1.7552459  | 1.06431556 | 2.08501255  | 2.51785003 | -0.175135168 | 1.08363189 | 0.59035716  | YDL185C-A |
| YML119W   | 28.6720449 | 40.5203991 | 32.3207349 | 26.4896316 | 31.9267547  | 31.6345261 | -0.17514702  | 5.00317485 | 0.199732029 | YML119W   |
| YDL179W   | 25.5154895 | 40.0599401 | 28.0234087 | 25.3661874 | 28.1476695  | 29.5040376 | -0.175148621 | 4.8870183  | 0.258364244 | PCL9      |
| YBR007C   | 53.2668724 | 54.391729  | 51.7494913 | 47.243785  | 50.3660845  | 43.5781737 | -0.175201219 | 5.65046504 | 0.057747771 | DSF2      |
| YHR017W   | 33.2095933 | 41.3262025 | 32.8049407 | 27.6722045 | 33.6208274  | 33.8941351 | -0.175319115 | 5.08266978 | 0.164040045 | YSC83     |
| YLL056C   | 9.20661992 | 8.518493   | 8.04992087 | 8.63278173 | 6.45050758  | 7.68267061 | -0.175389365 | 3.03936507 | 0.310097152 | YLL056C   |
| YAR053W   | 1.31523142 | 0.86336078 | 0.96841153 | 0.94605827 | 0.78187971  | 1.03296412 | -0.175874706 | 0.14437046 | 0.664591261 | YAR053W   |
| YPL099C   | 10.4560898 | 15.3678218 | 11.0762069 | 10.2925521 | 11.555376   | 11.9436476 | -0.176177836 | 3.55448061 | 0.344630384 | INA17     |
| YLL004W   | 33.3411164 | 47.1970558 | 38.6154099 | 34.9450274 | 35.1194302  | 35.5081415 | -0.176189473 | 5.23300034 | 0.152574043 | ORC3      |
| YMR250W   | 90.4879215 | 87.1418811 | 82.2544546 | 83.1939993 | 71.7374631  | 74.8898984 | -0.176569959 | 6.35318459 | 0.046116479 | GAD1      |
| YKR093W   | 508.534228 | 392.426252 | 498.005631 | 408.40153  | 402.733206  | 426.54962  | -0.176604255 | 8.77988445 | 0.10254303  | PTR2      |
| YER054C   | 11.4425133 | 12.8928543 | 11.3788355 | 10.1701264 | 10.1644362  | 11.298045  | -0.17662553  | 3.50540105 | 0.244520242 | GIP2      |
| YGR123C   | 106.139175 | 123.518149 | 103.801611 | 95.0788564 | 103.729374  | 96.3239038 | -0.176713049 | 6.71291114 | 0.055219039 | PPT1      |
| YLR455W   | 58.1332286 | 53.8161551 | 57.6204862 | 49.9637025 | 49.3235782  | 50.679802  | -0.176731966 | 5.73823001 | 0.041505931 | PDP3      |
| YLR097C   | 27.0937672 | 32.2321357 | 26.1471114 | 27.7313331 | 25.8020303  | 22.079608  | -0.176875714 | 4.75467257 | 0.166652383 | HRT3      |
| YBR196C   | 4058.40958 | 3134.22985 | 3680.50856 | 3262.06805 | 3175.86506  | 3180.43195 | -0.176887196 | 11.7378222 | 0.097280335 | PGH1      |
| YGR105W   | 5.78701824 | 8.518493   | 5.74994348 | 6.91805112 | 5.66862788  | 5.16482058 | -0.176931462 | 2.68963401 | 0.412284976 | VMA21     |
| YPL011C   | 37.3525723 | 44.7220883 | 40.6732844 | 36.7188867 | 36.8135029  | 35.12078   | -0.177001044 | 5.2746644  | 0.081921604 | TAM3      |
| YLR018C   | 37.2868107 | 47.5999575 | 41.9443245 | 32.9937822 | 39.2242986  | 40.0919198 | -0.177424605 | 5.32169513 | 0.132213478 | POF34     |
| YBR282W   | 12.56046   | 12.1446083 | 13.3156586 | 12.1805003 | 10.2947495  | 11.1043642 | -0.177442004 | 3.5929245  | 0.231896524 | MRPL27    |
| YPL198W   | 139.348769 | 165.30481  | 133.459214 | 134.162889 | 126.012946  | 127.248267 | -0.177568684 | 7.10577371 | 0.064087005 | RPL7B     |
| YMR033W   | 80.5579243 | 91.8040293 | 76.746614  | 73.3786447 | 77.0151512  | 69.9187586 | -0.177691983 | 6.29233336 | 0.054369048 | ARP9      |
| YPR199C   | 36.3003871 | 50.8231711 | 38.7364613 | 36.7188867 | 37.3999127  | 37.2512684 | -0.177913364 | 5.3107598  | 0.151541815 | ARR1      |
| YJR083C   | 14.2044993 | 17.6125599 | 16.2208932 | 11.1753133 | 14.5950879  | 16.7856669 | -0.177959766 | 3.92836813 | 0.302107284 | ACF4      |
| YKL140W   | 85.4900421 | 81.2134704 | 79.2886942 | 71.9004287 | 68.3493177  | 77.1495074 | -0.177977519 | 6.27344988 | 0.037597933 | TGL1      |
| YJR060W   | 43.5999215 | 43.8011701 | 42.489056  | 41.8039499 | 38.4424189  | 34.4751774 | -0.178253043 | 5.35425229 | 0.075630402 | CBF1      |
| YJL180C   | 29.7899916 | 38.4483333 | 28.6286659 | 28.1452336 | 30.4281519  | 27.1153081 | -0.17829229  | 4.93407032 | 0.163613093 | ATP12     |
| YDR207C   | 66.4191866 | 71.8316167 | 74.6282137 | 58.5964842 | 63.201943   | 66.4325047 | -0.178422361 | 6.06570904 | 0.047912893 | UME6      |
| YNL129W   | 11.7055596 | 14.5620184 | 12.347247  | 13.540459  | 10.750846   | 9.8131591  | -0.178503995 | 3.6173403  | 0.29444402  | NRK1      |
| YIR021W   | 36.3003871 | 35.5129066 | 39.1601414 | 35.5363138 | 29.5159589  | 32.9257312 | -0.178638506 | 5.12774504 | 0.091821879 | MRS1      |
| YDR375C   | 51.5570716 | 61.8166316 | 56.1678689 | 50.2002171 | 48.8023251  | 50.8734827 | -0.178774996 | 5.73825256 | 0.059331915 | BSC1      |
| YNL099C   | 33.8014474 | 42.6500224 | 38.7364613 | 38.1971027 | 33.685984   | 29.8913991 | -0.178803817 | 5.18262971 | 0.139684969 | OCA1      |
| YKL081W   | 2587.38901 | 1985.67223 | 2416.67098 | 2053.06471 | 2014.90401  | 2105.56823 | -0.179114559 | 11.0993382 | 0.099209442 | TEF4      |
| YDL198C   | 106.928314 | 89.213947  | 99.3832335 | 93.8371549 | 82.0973693  | 84.8967383 | -0.179191292 | 6.53682215 | 0.056910102 | GGC1      |
| YJR094C   | 7.82562693 | 13.1230838 | 10.2288468 | 8.92842494 | 8.34005021  | 10.3296412 | -0.179350053 | 3.31440799 | 0.385467125 | IME1      |
| YGR096W   | 16.5719159 | 15.1951497 | 15.2524816 | 14.4273887 | 12.7707019  | 14.2678169 | -0.179578143 | 3.89469898 | 0.187194607 | TPC1      |
| YDL165W   | 29.4611837 | 45.0674326 | 35.2259695 | 30.6286366 | 32.4480078  | 33.9586953 | -0.179628215 | 5.11356256 | 0.19666933  | CDC36     |
| YLR075W   | 2314.34696 | 3192.47792 | 2431.25768 | 2379.04091 | 2301.39776  | 2328.43024 | -0.179628641 | 11.282694  | 0.13294082  | RPL10     |
| YBR197C   | 21.8328415 | 23.4258558 | 25.0576484 | 17.6203353 | 22.218415   | 22.337849  | -0.179646824 | 4.47276144 | 0.173031887 | YBR197C   |
| YNL168C   | 55.2397195 | 60.1474675 | 51.6284398 | 41.9222072 | 52.2556271  | 53.3913328 | -0.179807385 | 5.71565806 | 0.101176632 | FMP41     |
| YGL100W   | 101.864673 | 110.797966 | 99.3832335 | 90.4668223 | 94.7377579  | 90.3197999 | -0.179945003 | 6.61563391 | 0.032452294 | SEH1      |
| YDR050C   | 3718.55379 | 3290.09525 | 3247.8707  | 3537.07537 | 2865.00272  | 2651.1024  | -0.180020472 | 11.6521366 | 0.123974294 | TPH1      |
| YBL071W-A | 11.5740365 | 9.6696407  | 10.410424  | 12.4761435 | 7.49301386  | 7.87635139 | -0.180335462 | 3.33006984 | 0.380018265 | KTI11     |

|           |            |            |            |            |            |            |              |            |             |           |
|-----------|------------|------------|------------|------------|------------|------------|--------------|------------|-------------|-----------|
| YJL199C   | 4.27450211 | 5.69818113 | 4.47890334 | 4.90767729 | 3.97455518 | 3.87361544 | -0.180406081 | 2.22545046 | 0.407447987 | MBB1      |
| YMR074C   | 66.353425  | 80.695454  | 63.1888525 | 61.6711736 | 61.9639668 | 61.977847  | -0.180417724 | 6.0469974  | 0.07374528  | YMR074C   |
| YDR524C-B | 117.252881 | 100.898096 | 109.854183 | 87.8060334 | 91.6753957 | 109.946118 | -0.180446524 | 6.68670156 | 0.074022162 | YDR524C-B |
| YPL196W   | 19.7942328 | 23.0805114 | 17.6129848 | 21.2271825 | 15.7027508 | 16.3983053 | -0.180679108 | 4.25716638 | 0.249200274 | OXR1      |
| YGL057C   | 19.7942328 | 24.5194461 | 17.128779  | 16.851663  | 18.5044864 | 18.9161554 | -0.180745234 | 4.27956508 | 0.229553306 | GEF7      |
| YHR013C   | 70.6279271 | 75.4577319 | 70.451939  | 66.8153655 | 62.8110031 | 61.3968047 | -0.180773708 | 6.08887293 | 0.034377161 | ARD1      |
| YCR065W   | 225.62795  | 208.760636 | 217.347863 | 189.684684 | 196.903373 | 188.25771  | -0.181010034 | 7.67632647 | 0.037692538 | HCM1      |
| YER122C   | 229.770929 | 254.115855 | 238.89502  | 196.957507 | 216.906462 | 223.636731 | -0.181407952 | 7.82556273 | 0.050575146 | GL03      |
| YNL050C   | 20.6491333 | 21.814249  | 21.4866309 | 20.9315393 | 18.5044864 | 16.9147874 | -0.181496654 | 4.33567814 | 0.148248965 | YNL050C   |
| YOR045W   | 6.90496494 | 4.6621482  | 6.1130978  | 5.85373556 | 4.69127824 | 4.97113981 | -0.181543714 | 2.49865599 | 0.369572495 | TOM6      |
| YBR017C   | 261.336483 | 257.799528 | 255.358016 | 234.563323 | 223.943379 | 224.346894 | -0.181578977 | 7.92495155 | 0.035188858 | KAP104    |
| YLR078C   | 29.0008528 | 32.0019061 | 29.3549746 | 24.9522869 | 24.6943674 | 30.0850799 | -0.181613214 | 4.83185327 | 0.121682886 | BOS1      |
| YJR057W   | 19.9915175 | 30.7356437 | 23.6655568 | 21.7593403 | 23.4563912 | 20.4656016 | -0.18175565  | 4.55473406 | 0.236632329 | CDC8      |
| YJR045C   | 1623.19285 | 1364.57049 | 1632.31816 | 1345.17661 | 1361.5132  | 1366.09504 | -0.181877082 | 10.5007685 | 0.067722314 | SSC1      |
| YLR147C   | 4.53754839 | 6.84932883 | 4.59995478 | 4.78942    | 4.49580832 | 4.84201929 | -0.182323547 | 2.36757776 | 0.420764319 | SMD3      |
| YCR075C   | 53.5299187 | 43.8587275 | 53.32316   | 44.4647388 | 42.2215042 | 46.0314634 | -0.182392805 | 5.56544264 | 0.074531019 | ERS1      |
| YNL195C   | 5.32668724 | 4.43191866 | 4.59995478 | 4.31639087 | 4.95190481 | 3.35713338 | -0.182428873 | 2.20709484 | 0.405377006 | YNL195C   |
| YER079W   | 11.5740365 | 14.1591167 | 13.2551329 | 12.0031143 | 11.9888222 | 10.3942014 | -0.182441187 | 3.62891418 | 0.237673137 | YER079W   |
| YIL071W-A | 5.65549509 | 3.8563448  | 3.38944036 | 4.49377679 | 2.99720554 | 3.80905518 | -0.182450065 | 2.05413027 | 0.453853115 | YIL071W-A |
| YJR091C   | 4.01145582 | 3.56855788 | 4.53942906 | 2.60166025 | 3.84424189 | 4.26097698 | -0.182619942 | 1.97022578 | 0.454358069 | TIM12     |
| YMR290W-A | 13.3495989 | 14.9073628 | 12.7104014 | 8.8692963  | 12.2494487 | 15.0425399 | -0.182761693 | 3.69717417 | 0.338039102 | YMR290W-A |
| YGL043W   | 64.2490547 | 64.118927  | 63.2493782 | 52.5653627 | 59.8137976 | 56.4902251 | -0.182883604 | 5.91177814 | 0.036804271 | DST1      |
| YIR019C   | 39.5884657 | 33.0379391 | 39.4022442 | 28.4408768 | 37.8560092 | 32.4092491 | -0.182929255 | 5.13858578 | 0.138378391 | FLO11     |
| YPR027C   | 11.639798  | 11.2812475 | 12.5893499 | 8.81016766 | 11.3372558 | 11.1689245 | -0.183312718 | 3.49242578 | 0.265663363 | YPR027C   |
| YLR439W   | 44.2575372 | 48.0604166 | 50.0547711 | 38.0788455 | 42.807914  | 44.6111378 | -0.18334281  | 5.48457856 | 0.066883821 | MRPL4     |
| YIL152W   | 18.3474783 | 21.3537899 | 17.1893047 | 15.8464761 | 16.6801004 | 17.6249502 | -0.1835244   | 4.16780916 | 0.174331141 | YIL152W   |
| YLR042C   | 18.2159551 | 16.4038548 | 21.7287338 | 14.2500027 | 14.5950879 | 20.7884028 | -0.183647047 | 4.15212684 | 0.28989902  | YLR042C   |
| YDR140W   | 22.1616494 | 28.1455613 | 22.8181967 | 21.641083  | 21.5668486 | 21.2403246 | -0.183744731 | 4.52819982 | 0.148187137 | MTQ2      |
| YIL071C   | 18.2159551 | 22.274708  | 17.4919333 | 16.851663  | 15.2466543 | 18.9807156 | -0.184070297 | 4.19515175 | 0.211699896 | PC18      |
| YGR030C   | 6.18158766 | 8.69116516 | 6.71835501 | 6.20850741 | 6.51566423 | 6.32690521 | -0.184513319 | 2.78943433 | 0.329995931 | POP6      |
| YML079W   | 60.3691221 | 72.8676496 | 61.2520294 | 59.1877707 | 54.2103264 | 57.7814303 | -0.184673036 | 5.93293892 | 0.057958561 | YML079W   |
| YLR181C   | 36.629195  | 39.9448253 | 33.7128265 | 35.8910857 | 30.8190918 | 30.2787607 | -0.184705274 | 5.11647164 | 0.096684861 | VTA1      |
| YKL060C   | 18462.2322 | 15652.7309 | 17058.0244 | 15679.9107 | 14910.3809 | 14426.8933 | -0.184902647 | 13.9686499 | 0.059860142 | FBA1      |
| YPL160W   | 995.038329 | 924.083818 | 946.319645 | 878.888135 | 842.801168 | 798.804063 | -0.18500058  | 9.81022472 | 0.044657385 | CDC60     |
| YHR089C   | 194.851534 | 228.445262 | 208.026902 | 182.352732 | 188.628479 | 184.319534 | -0.185382152 | 7.62872426 | 0.044883031 | GAR1      |
| YLR271W   | 6.90496494 | 6.61909929 | 6.83940645 | 6.20850741 | 6.05956773 | 5.61674238 | -0.18557732  | 2.70087314 | 0.274027482 | YLR271W   |
| YDR403W   | 5.72125667 | 5.18016466 | 6.77888073 | 4.84854864 | 4.95190481 | 5.7458629  | -0.185728686 | 2.50073878 | 0.3495146   | DIT1      |
| YBL003C   | 83.2541487 | 130.827936 | 91.1517355 | 95.965786  | 88.6781901 | 83.7992139 | -0.185751644 | 6.58176785 | 0.178520594 | HTA2      |
| YPR202W   | 47.2825695 | 38.3332185 | 45.091662  | 38.6110032 | 37.334756  | 38.8652749 | -0.185781543 | 5.35879229 | 0.073405365 | YPR202W   |
| YOR012W   | 7.43105751 | 6.44642714 | 7.80781798 | 5.14419185 | 6.58082087 | 7.35986933 | -0.18589476  | 2.78815051 | 0.338957262 | YOR012W   |
| YLL002W   | 29.0008528 | 34.3617589 | 27.4181515 | 28.4408768 | 26.1929702 | 25.1785003 | -0.186036725 | 4.83685092 | 0.12009033  | RTT109    |
| YNL006W   | 39.8515119 | 45.7005638 | 41.3390673 | 39.7935761 | 38.3772623 | 33.377653  | -0.186084756 | 5.31779848 | 0.077803685 | LST8      |
| YDR454C   | 277.11926  | 301.888485 | 290.52346  | 269.153578 | 250.52729  | 244.618815 | -0.1860925   | 8.08984447 | 0.039395645 | GUK1      |
| YLR281C   | 4.34026368 | 4.37436127 | 3.51049181 | 3.72510445 | 3.97455518 | 3.03433209 | -0.186239951 | 1.98294966 | 0.398365074 | YLR281C   |
| YLR410W   | 243.054766 | 241.050329 | 237.987134 | 215.996929 | 210.260485 | 208.33595  | -0.186275817 | 7.82174808 | 0.029804338 | VIP1      |
| YOL026C   | 18.6762861 | 18.1881337 | 19.9129621 | 17.679464  | 17.5922934 | 14.5906181 | -0.186473431 | 4.16232624 | 0.162381981 | MIM1      |
| YJL184W   | 9.14085835 | 10.4178867 | 8.95780668 | 8.21888124 | 8.86130335 | 8.0054719  | -0.186596252 | 3.18043193 | 0.243639812 | GON7      |
| YDL083C   | 1100.12532 | 997.12414  | 1047.76075 | 867.417178 | 937.799552 | 957.880537 | -0.186774573 | 9.94368636 | 0.046495296 | RPS16B    |
| YLR246W   | 27.4225751 | 30.2751846 | 29.1128717 | 21.0497966 | 26.9096933 | 28.4065132 | -0.187049893 | 4.77175529 | 0.146058831 | ERF2      |
| YBL112C   | 1.18370828 | 0.97847555 | 1.1499887  | 0.65041506 | 0.97734963 | 1.29120515 | -0.187208982 | 0.21062159 | 0.676140929 | YBL112C   |
| YHR218W-A | 1.18370828 | 0.97847555 | 1.1499887  | 0.65041506 | 0.97734963 | 1.29120515 | -0.187212043 | 0.21062159 | 0.676059585 | YHR218W-A |
| Q0160     | 0.32880785 | 0.46045908 | 0.42368005 | 0.29564321 | 0.4560965  | 0.32280129 | -0.187299014 | -0.9831345 | 0.763049644 | SCE1      |
| YIL088C   | 176.701341 | 147.462021 | 174.67723  | 129.609983 | 142.04148  | 166.436343 | -0.187352541 | 7.28780208 | 0.084064184 | AVT7      |
| YCR013C   | 2063.20352 | 1776.27846 | 2096.9136  | 1767.82814 | 1646.76898 | 1798.32597 | -0.187471203 | 10.8597993 | 0.06060949  | YCR013C   |
| YDR123C   | 14.0729762 | 15.1375923 | 14.8893273 | 10.5840269 | 14.4647746 | 13.7513348 | -0.187503394 | 3.80075517 | 0.231575808 | INO2      |
| YMR001C   | 122.842614 | 134.396494 | 114.393612 | 117.370354 | 111.808798 | 97.0986269 | -0.187666219 | 6.86372323 | 0.052840893 | CDC5      |
| YCR009C   | 78.0589846 | 112.754917 | 76.080831  | 87.037361  | 78.5137539 | 68.8212342 | -0.187744201 | 6.38742012 | 0.174146237 | RVS161    |
| YOR096W   | 1001.28568 | 1110.6273  | 1039.77136 | 961.076947 | 891.147396 | 914.431484 | -0.187988121 | 9.94622591 | 0.043037609 | RPS7A     |
| YDR399W   | 276.395882 | 304.881469 | 276.965698 | 257.268721 | 251.439482 | 244.683375 | -0.18804528  | 8.07010462 | 0.036874758 | HPT1      |
| YDR251W   | 10.5876129 | 10.8207884 | 11.3183098 | 10.406641  | 10.2947495 | 8.0054719  | -0.188099207 | 3.3747865  | 0.24828971  | NOP19     |
| YGL219W   | 13.941453  | 25.0374625 | 17.3103561 | 19.2168087 | 14.6602445 | 15.559022  | -0.188379652 | 4.15372742 | 0.342080468 | DTD1      |
| YPL027W   | 1.44675456 | 1.32381986 | 1.7552459  | 1.06431556 | 1.43344613 | 1.48488592 | -0.188581363 | 0.62202676 | 0.575508767 | SMA1      |
| YLR022C   | 32.0916466 | 35.6280214 | 32.6838892 | 30.5103793 | 30.2978387 | 27.3089888 | -0.188627391 | 4.98002131 | 0.073828171 | SDO1      |
| YOR281C   | 34.787871  | 39.4268088 | 38.8575128 | 29.9190929 | 33.881454  | 35.5081415 | -0.189013406 | 5.15086765 | 0.078242185 | PLP2      |
| YCL052C   | 60.8952146 | 78.5082733 | 58.2862691 | 65.8101786 | 55.9695557 | 51.5836456 | -0.189479668 | 5.95431422 | 0.124346955 | PBN1      |
| YDR371W   | 27.3568135 | 36.0884805 | 28.4470888 | 24.5383864 | 27.4309464 | 28.7293145 | -0.18955282  | 4.85330655 | 0.142992634 | CTS2      |
| YNL051W   | 26.4361515 | 40.4052844 | 26.5707914 | 26.5487603 | 25.7368737 | 29.6977183 | -0.189847473 | 4.87724555 | 0.22682511  | COG5      |
| YER117W   | 1022.1321  | 1082.07884 | 1062.71061 | 1005.42343 | 889.453324 | 880.149987 | -0.190555349 | 9.95196997 | 0.045441726 | RPL23B    |
| YOL111C   | 65.4985246 | 73.7310104 | 59.8599379 | 62.0259455 | 59.1622312 | 53.2622122 | -0.190581945 | 5.96349459 | 0.058133842 | MDY2      |
| YNL197C   | 256.996219 | 206.976357 | 245.492324 | 169.167045 | 218.535378 | 233.901812 | -0.19079229  | 7.7940122  | 0.124055755 | WHI3      |
| YDR033W   | 1941.61038 | 1500.00301 | 1940.39408 | 1460.65484 | 1557.69985 | 1696.70812 | -0.190853023 | 10.7167744 | 0.099237358 | MRH1      |
| YLR003C   | 26.4361515 | 44.4343013 | 28.3260373 | 28.6182627 | 28.2128261 | 30.1496401 | -0.191138734 | 4.96326023 | 0.250888424 | CMS1      |
| YER065C   | 87.3313661 | 81.3861426 | 89.093861  | 70.6587272 | 73.1057526 | 82.056087  | -0.191231834 | 6.33494228 | 0.031905134 | ICL1      |



|           |            |            |            |            |            |            |              |            |             |           |
|-----------|------------|------------|------------|------------|------------|------------|--------------|------------|-------------|-----------|
| YIL163C   | 2.43317812 | 1.66916417 | 2.11840023 | 1.35995877 | 1.82438598 | 2.259609   | -0.191541757 | 1.04087599 | 0.545958876 | YIL163C   |
| YDL049C   | 8.08867322 | 9.32429639 | 9.50253816 | 6.38589334 | 8.20973693 | 9.03843602 | -0.191672532 | 3.09575027 | 0.300842672 | KNH1      |
| YJL190C   | 1135.83385 | 1032.57949 | 1169.65955 | 861.918215 | 993.834264 | 1066.72913 | -0.191842207 | 10.0272656 | 0.067533115 | RPS22A    |
| YBR088C   | 119.29149  | 158.800826 | 117.662001 | 120.858944 | 117.412269 | 108.202991 | -0.192173804 | 6.95260343 | 0.090750932 | POL30     |
| YPL267W   | 11.5740365 | 10.5330015 | 9.07885812 | 9.16493951 | 9.51286977 | 8.58651422 | -0.192279678 | 3.30203235 | 0.235927923 | ACM1      |
| YGL226C-A | 17.6898626 | 14.9649201 | 15.3735331 | 11.7665998 | 13.2267984 | 17.0439079 | -0.192422066 | 3.91816909 | 0.242386065 | OST5      |
| YBL084C   | 58.1989902 | 57.384713  | 60.4046694 | 49.4906734 | 51.9950005 | 52.5520494 | -0.192487181 | 5.78477652 | 0.025290415 | CDC27     |
| YGR238C   | 52.0831641 | 48.4057609 | 49.6916168 | 42.7500082 | 44.3065167 | 44.2883365 | -0.193031348 | 5.55589637 | 0.029705827 | KEL2      |
| YLR282C   | 1.70980084 | 2.12962325 | 1.81577162 | 1.77385926 | 1.17281956 | 2.00136798 | -0.193093074 | 0.92455468 | 0.550983017 | YLR282C   |
| YBL070C   | 5.85277981 | 6.90688622 | 6.83940645 | 5.38070642 | 5.66862788 | 6.13322444 | -0.193221548 | 2.64649632 | 0.291168152 | YBL070C   |
| YEL068C   | 6.57615709 | 9.09406685 | 6.1130978  | 5.61722099 | 6.64597751 | 6.84338727 | -0.193572722 | 2.79685872 | 0.347846448 | YEL068C   |
| YLR436C   | 227.140466 | 210.142013 | 241.618677 | 166.861028 | 205.373736 | 221.183441 | -0.194329098 | 7.72902459 | 0.079824731 | ECM30     |
| YLR295C   | 33.1438317 | 47.9453018 | 32.8654664 | 32.1659813 | 33.3602008 | 34.1523761 | -0.194595783 | 5.16024083 | 0.161647935 | ATP14     |
| YOR352W   | 16.5061543 | 24.1165444 | 14.5866987 | 16.6151484 | 17.9832333 | 13.6867745 | -0.194662725 | 4.12119411 | 0.299034644 | TFB6      |
| YJL063C   | 50.5048864 | 48.2906461 | 50.4179254 | 45.3516684 | 40.8532147 | 44.0946557 | -0.194725835 | 5.54587312 | 0.031799835 | MRPL8     |
| YDR002W   | 158.353863 | 200.472372 | 167.777298 | 178.213727 | 150.642157 | 131.186443 | -0.194919951 | 7.36289493 | 0.105717427 | YRB1      |
| YNL005C   | 64.2490547 | 67.9752719 | 63.9151612 | 66.7562368 | 53.4284467 | 51.0671635 | -0.194925893 | 5.93976728 | 0.064172551 | MRP7      |
| YMR299C   | 13.5468836 | 21.066003  | 16.7656247 | 15.3143183 | 14.9860277 | 14.6551784 | -0.194970861 | 4.01905674 | 0.244146381 | DYN3      |
| YNL077W   | 38.010188  | 37.066956  | 37.2233183 | 33.4668114 | 30.3629953 | 34.2169363 | -0.195212741 | 5.137027   | 0.047187159 | APJ1      |
| YBL059W   | 5.26092567 | 6.90688622 | 5.74994348 | 5.61722099 | 4.1700251  | 5.87498341 | -0.195259662 | 2.52056344 | 0.356607918 | YBL059W   |
| YLR186W   | 72.337728  | 89.9046356 | 73.054545  | 60.0155716 | 67.4371247 | 78.1824715 | -0.195430836 | 6.20211013 | 0.08751337  | EMG1      |
| YLR119W   | 5.45821038 | 6.73421406 | 6.47625213 | 4.49377679 | 5.99441109 | 5.87498341 | -0.195857293 | 2.57664777 | 0.337526957 | SRN2      |
| YMR105C   | 99.5630183 | 100.495194 | 97.0832562 | 92.4771961 | 85.4855146 | 81.3459242 | -0.196064109 | 6.53728888 | 0.020378137 | PGM2      |
| YPL112C   | 38.6020421 | 53.9888273 | 42.065376  | 41.3309208 | 39.8758651 | 36.4119851 | -0.196117932 | 5.39937075 | 0.115776086 | PEX25     |
| YDR502C   | 152.303798 | 139.922003 | 143.203855 | 130.733427 | 123.60215  | 125.5697   | -0.196400037 | 7.08762814 | 0.018186296 | SAM2      |
| YNL055C   | 1305.36718 | 964.604218 | 1183.39889 | 986.029234 | 975.785875 | 1051.81571 | -0.196452094 | 10.074056  | 0.084113456 | POR1      |
| YPR131C   | 16.1115849 | 21.4689047 | 16.4629961 | 17.0881775 | 16.0936906 | 14.0095758 | -0.196493915 | 4.08955965 | 0.203841661 | NAT3      |
| YHR060W   | 14.2702609 | 20.6631013 | 18.5813963 | 16.2012479 | 15.5724375 | 14.9779797 | -0.196867534 | 4.07603646 | 0.205843336 | VMA22     |
| YPR043W   | 739.751911 | 716.70456  | 646.051544 | 784.637079 | 576.636284 | 472.839324 | -0.196937731 | 9.35812351 | 0.181574223 | RPL43A    |
| YPL226W   | 1058.62977 | 999.829337 | 1110.34435 | 895.798926 | 936.952516 | 931.604512 | -0.196994294 | 9.94980299 | 0.032257398 | NEW1      |
| YLR130C   | 182.291074 | 150.742792 | 166.990464 | 133.453345 | 149.925434 | 152.685008 | -0.197343105 | 7.28651262 | 0.041446415 | ZRT2      |
| YDR202C   | 20.1888023 | 29.0664795 | 20.0945393 | 20.2811242 | 17.0710403 | 23.1771324 | -0.197573229 | 4.44633028 | 0.23649555  | RAV2      |
| YGR240C   | 1606.6867  | 1293.89002 | 1498.98    | 1310.05419 | 1278.95973 | 1246.98137 | -0.197712206 | 10.4228073 | 0.052660213 | PFK1      |
| YNL012W   | 14.9278766 | 13.9864446 | 16.2208932 | 12.890044  | 12.5100753 | 13.9450156 | -0.197720286 | 3.82835398 | 0.153503894 | SPO1      |
| YBR252W   | 49.5842244 | 49.5569086 | 49.7521425 | 37.9605882 | 44.5019867 | 47.4517891 | -0.197725879 | 5.54183888 | 0.050448092 | DUT1      |
| YKR037C   | 20.6491333 | 24.9799052 | 21.8497852 | 18.5663936 | 20.8501255 | 19.4971977 | -0.197958002 | 4.40614683 | 0.116239264 | SPC34     |
| YKL067W   | 68.5235568 | 77.8751421 | 64.2783155 | 69.2987684 | 57.4030018 | 56.8775866 | -0.198257298 | 6.04137789 | 0.059967087 | YNK1      |
| YJR032W   | 48.9923703 | 55.4853193 | 46.4837536 | 45.5290543 | 42.9382273 | 43.1262519 | -0.19834609  | 5.56178126 | 0.041697351 | CPR7      |
| YMR125W   | 210.897358 | 244.791559 | 224.005693 | 191.222028 | 199.965735 | 201.234322 | -0.198535786 | 7.72900862 | 0.031091083 | STO1      |
| YGL259W   | 1.05218513 | 0.69068862 | 1.08946297 | 0.76867235 | 0.78187971 | 0.9038436  | -0.198568985 | 0.00279677 | 0.642323626 | YPS5      |
| YPR134W   | 14.862115  | 21.9293637 | 17.552459  | 17.679464  | 14.7254012 | 14.9779797 | -0.198796938 | 4.09732822 | 0.222509202 | MSS18     |
| YOR046C   | 172.689885 | 196.213126 | 171.590418 | 156.040486 | 155.594062 | 159.334715 | -0.198873873 | 7.39846835 | 0.026472151 | DBP5      |
| YNL074C   | 35.9715793 | 40.8657435 | 36.9812154 | 31.870338  | 31.144875  | 36.2183043 | -0.198895998 | 5.15563334 | 0.060716918 | AIF1      |
| YDL214C   | 11.7713212 | 11.0510179 | 11.0762069 | 10.1701264 | 9.51286977 | 9.8131591  | -0.199100106 | 3.41853904 | 0.180773537 | PRR2      |
| YHR108W   | 243.975428 | 267.87207  | 254.994862 | 196.307091 | 229.677164 | 242.100965 | -0.199190375 | 7.90256322 | 0.046388687 | GGA2      |
| YJL212C   | 224.37848  | 188.500436 | 231.874036 | 176.262482 | 190.843805 | 194.390935 | -0.199391237 | 7.65215238 | 0.046872954 | OPT1      |
| YNL111C   | 13.6784067 | 19.7997405 | 17.9761391 | 15.4917042 | 14.3344613 | 15.0425399 | -0.199559632 | 4.01866799 | 0.204625972 | CYB5      |
| YHL030W-A | 8.54900421 | 11.511477  | 12.5288242 | 4.90767729 | 9.96896627 | 13.557654  | -0.199774852 | 3.36254231 | 0.498289167 | YHL030W-A |
| YNL190W   | 350.837981 | 253.597839 | 358.97805  | 281.688851 | 279.065899 | 277.931908 | -0.199853125 | 8.23101685 | 0.097926335 | YNL190W   |
| YPL140C   | 33.6041627 | 38.7361202 | 33.3496722 | 30.3329934 | 30.3629953 | 31.376285  | -0.200004848 | 5.04871942 | 0.058751835 | MKK2      |
| YDR024W   | 0.460331   | 0.34534431 | 0.36315432 | 0.11825728 | 0.4560965  | 0.4519218  | -0.200198911 | -1.0423433 | 0.758399412 | FYV1      |
| YIL102C   | 0.460331   | 0.05755739 | 0.3026286  | 0.17738593 | 0.19546993 | 0.32280129 | -0.20026528  | -1.4269061 | 0.850269407 | YIL102C   |
| YAR075W   | 0          | 0.34534431 | 0          | 0.11825728 | 0.19546993 | 0          | -0.200690046 | -2.0748348 | 1           | YAR075W   |
| YPR158W   | 8.8120505  | 13.9864446 | 11.3183098 | 10.4657696 | 10.3599061 | 8.9093155  | -0.200802661 | 3.43259865 | 0.287838655 | CUR1      |
| YOR229W   | 37.1552875 | 43.3982684 | 41.3399593 | 36.3641148 | 36.2922497 | 33.5067735 | -0.200813531 | 5.25412916 | 0.048592933 | WTM2      |
| YGL116W   | 43.4683983 | 45.4703343 | 45.3942906 | 40.0300906 | 37.0741294 | 39.7691185 | -0.200830495 | 5.39247302 | 0.030101244 | CDC20     |
| YNL174W   | 27.7513829 | 33.6710703 | 29.5365517 | 24.7157724 | 30.4933086 | 24.0164157 | -0.200970875 | 4.83292158 | 0.114504673 | YNL174W   |
| YPR160C-A | 0          | 0          | 0.36315432 | 0          | 0.32578321 | 0          | -0.201125153 | -2.0738963 | 1           | YPR160C-A |
| YDL204W   | 16.9007237 | 21.4689047 | 17.6129848 | 16.5560198 | 16.1588473 | 16.0109438 | -0.20180992  | 4.13721901 | 0.146128993 | RTN2      |
| YOR339C   | 3.94569425 | 4.02901696 | 4.53942906 | 3.37033259 | 2.86689226 | 4.64833852 | -0.202254766 | 2.00928726 | 0.375459582 | UBC11     |
| YER124C   | 221.221924 | 272.822006 | 226.971453 | 217.061245 | 208.370942 | 200.976081 | -0.203076491 | 7.81200774 | 0.043974041 | DSE1      |
| YJL219W   | 3.35384011 | 3.62611526 | 4.72100622 | 2.42427432 | 4.10486846 | 3.67993466 | -0.203200192 | 1.91493683 | 0.423928563 | HXT9      |
| YOR354C   | 103.771759 | 134.741839 | 111.306801 | 100.223048 | 100.341229 | 103.425532 | -0.203210397 | 6.7697726  | 0.042680616 | MSC6      |
| YKL153W   | 1665.87211 | 1524.17712 | 1680.37559 | 1376.81043 | 1358.77662 | 1494.63452 | -0.203304355 | 10.5669065 | 0.031848331 | YKL153W   |
| YOR252W   | 10.7191361 | 11.6265918 | 12.5288242 | 8.75103902 | 10.2295928 | 11.3626053 | -0.203440815 | 3.45873332 | 0.217303908 | TMA16     |
| YBR145W   | 31.7628387 | 29.0089221 | 30.6865404 | 27.908719  | 26.1278135 | 25.3076208 | -0.20353291  | 4.83769816 | 0.055317102 | ADH5      |
| YDR271C   | 5.85277981 | 6.40459081 | 6.65782929 | 4.73029136 | 4.56096496 | 5.55218212 | -0.203659374 | 2.44498028 | 0.31963843  | YDR271C   |
| YKR075C   | 31.105223  | 41.6715468 | 33.8338779 | 23.119299  | 32.2562579 | 37.3158287 | -0.203871868 | 5.05942047 | 0.208870347 | YKR075C   |
| YIR020C-B | 10.6533745 | 11.6265918 | 9.68411533 | 8.33713852 | 9.2522432  | 10.2005206 | -0.203938702 | 3.33409356 | 0.215359263 | YIR020C-B |
| YHL012W   | 33.4726396 | 33.4408408 | 37.5259469 | 24.3610005 | 31.9267547 | 34.4751774 | -0.203961948 | 5.02891625 | 0.118566017 | YHL012W   |
| YFL047W   | 85.2927574 | 94.6818986 | 88.9728096 | 77.7541642 | 78.0576574 | 77.7305497 | -0.204099464 | 6.39038498 | 0.013394995 | RGD2      |
| YOR044W   | 8.02291165 | 9.15162424 | 8.53412663 | 5.26244914 | 8.07942364 | 9.03843602 | -0.204339952 | 3.023661   | 0.324838695 | IRC23     |
| YDL055C   | 2907.71362 | 2783.82049 | 2723.53638 | 2594.44655 | 2375.80665 | 2333.27226 | -0.204364305 | 11.3552956 | 0.029168653 | PSA1      |

|           |            |            |            |            |            |             |              |            |             |           |
|-----------|------------|------------|------------|------------|------------|-------------|--------------|------------|-------------|-----------|
| YNL191W   | 30.7764152 | 36.0884805 | 29.7786546 | 29.0912919 | 27.8218862 | 26.9861875  | -0.204545458 | 4.9181193  | 0.068648465 | DUG3      |
| YAR068W   | 2.17013184 | 1.43893463 | 1.27104014 | 1.53734469 | 1.6940727  | 0.96840386  | -0.204606958 | 0.70693967 | 0.571410538 | YAR068W   |
| YPL031C   | 69.115411  | 65.4427469 | 62.220441  | 60.784244  | 55.3179893 | 54.4888571  | -0.205061544 | 5.93922411 | 0.02135721  | PHO85     |
| YNL321W   | 168.086575 | 136.526118 | 176.432476 | 123.105833 | 144.908372 | 149.263315  | -0.205171485 | 7.2271289  | 0.062877764 | VNX1      |
| YJR123W   | 3041.27537 | 3332.74527 | 3089.05121 | 2864.90096 | 2721.72326 | 2620.82364  | -0.205375721 | 11.5241648 | 0.02861296  | RPS5      |
| YDR240C   | 22.8850267 | 28.4909056 | 24.0892369 | 19.4533232 | 22.4138849 | 23.6936144  | -0.205403344 | 4.56313026 | 0.117362019 | SNU56     |
| YMR142C   | 927.632719 | 1170.37187 | 964.901041 | 912.414075 | 860.458618 | 882.603277  | -0.205969947 | 9.89666359 | 0.051169118 | RPL13B    |
| YKL026C   | 1.90708556 | 2.35985279 | 1.87629734 | 2.01037383 | 2.08501255 | 1.22664489  | -0.20684602  | 1.03021723 | 0.501403829 | GPX1      |
| YGL109W   | 3.22231697 | 4.31680389 | 3.14733748 | 3.42946124 | 2.54110905 | 3.29257312  | -0.207088711 | 1.79196745 | 0.373124651 | YGL109W   |
| YGL075C   | 11.9686059 | 15.8858383 | 13.0735557 | 10.8796701 | 12.5100753 | 12.1373284  | -0.20741857  | 3.68719237 | 0.198253371 | MPS2      |
| YER059W   | 27.6198598 | 34.9948902 | 26.87342   | 26.0166025 | 24.1079576 | 27.4381093  | -0.2074468   | 4.80677371 | 0.103114122 | PCL6      |
| YMR310C   | 46.888     | 48.9813348 | 52.1731713 | 35.6545711 | 45.1535531 | 47.5163493  | -0.207582026 | 5.52920909 | 0.067070805 | YMR310C   |
| YIL066W-A | 6.51039552 | 5.35283682 | 6.17362352 | 3.90249037 | 5.53831459 | 6.1977847   | -0.207613899 | 2.51628178 | 0.332842154 | YIL066W-A |
| YDR151C   | 37.2210491 | 51.6865319 | 40.4917072 | 34.1763551 | 38.3772623 | 39.639998   | -0.207654492 | 5.33673064 | 0.099415891 | CTH1      |
| YGR053C   | 1.90708556 | 2.12962325 | 1.69472018 | 1.65560198 | 1.75922934 | 1.54944617  | -0.208412423 | 0.93311022 | 0.495593768 | YGR053C   |
| YPL269W   | 40.5091277 | 43.1104815 | 37.5259469 | 35.2997993 | 34.4027071 | 35.12078    | -0.208942248 | 5.24017133 | 0.033320372 | KAR9      |
| YPL004C   | 546.412892 | 546.967831 | 510.352878 | 504.722088 | 454.07664  | 428.550988  | -0.209013504 | 8.9618951  | 0.029068721 | LSP1      |
| YDR184C   | 34.787871  | 57.5573851 | 38.1917298 | 36.2458576 | 38.3772623 | 38.4133531  | -0.209101434 | 5.3490967  | 0.177388431 | ATC1      |
| YDR410C   | 59.8430295 | 47.1394984 | 63.0072753 | 47.9533287 | 47.6295055 | 51.3899648  | -0.209205327 | 5.72629452 | 0.059452951 | STE14     |
| YBR239C   | 32.486216  | 28.3182335 | 29.2339231 | 25.4253161 | 26.4535968 | 25.9532234  | -0.209212949 | 4.81228966 | 0.053281747 | ERT1      |
| YKR007W   | 22.8192651 | 20.9508882 | 21.1234766 | 19.6898378 | 17.2665102 | 19.1098361  | -0.20922579  | 4.34255294 | 0.083029109 | MEH1      |
| YPL090C   | 930.000135 | 1104.06576 | 964.235258 | 980.766785 | 835.308154 | 777.176377  | -0.209371088 | 9.8643199  | 0.059883209 | RPS6A     |
| YDR201W   | 10.3245666 | 15.1951497 | 10.2288468 | 12.1213716 | 9.05677327 | 9.74859885  | -0.20942424  | 3.49478718 | 0.291549951 | SPC19     |
| YOR186W   | 1.38099299 | 0.97847555 | 1.1499887  | 1.00518691 | 0.84703635 | 1.16208463  | -0.209589504 | 0.27316823 | 0.619887107 | YOR186W   |
| YBR028C   | 67.4056101 | 70.2775673 | 65.3677785 | 58.2417124 | 56.7514354 | 60.6220816  | -0.209605395 | 5.98286389 | 0.013277579 | YPK3      |
| YOR325W   | 4.60330996 | 4.48947604 | 4.90258338 | 4.61203408 | 3.45330204 | 4.02273595  | -0.209617043 | 2.16229727 | 0.299512116 | YOR325W   |
| YJL042W   | 372.407776 | 310.234306 | 376.167355 | 291.681591 | 312.62157  | 311.18044   | -0.20976416  | 8.36264933 | 0.035266561 | MHP1      |
| YNL152W   | 33.2753549 | 43.340711  | 37.4654212 | 33.2302968 | 31.9267547 | 33.5713338  | -0.209871928 | 5.15459131 | 0.064031964 | INN1      |
| YBR181C   | 795.780769 | 957.29443  | 826.660295 | 793.151604 | 701.997664 | 735.34133   | -0.209880129 | 9.6472059  | 0.039906372 | RPS6B     |
| YBR011C   | 1100.45413 | 1128.64277 | 1018.88998 | 995.78546  | 896.555398 | 915.658129  | -0.209975005 | 9.97938286 | 0.026810952 | IPP1      |
| YDL298C   | 10.3903282 | 14.3893463 | 13.6182872 | 10.8796701 | 10.8811593 | 11.4917258  | -0.210321219 | 3.59545258 | 0.203317869 | YHC1      |
| YDL205C   | 112.583809 | 114.481639 | 109.006823 | 97.8579025 | 94.6226012 | 97.9379103  | -0.210335488 | 6.70814046 | 0.008344591 | HEM3      |
| YGR208W   | 88.4493128 | 91.4011276 | 86.2491521 | 81.8340405 | 73.6270058 | 74.4379766  | -0.210580092 | 6.3716731  | 0.012149986 | SER2      |
| YLR269C   | 1.31523142 | 1.5540494  | 2.42102883 | 1.65560198 | 1.36828949 | 1.54944617  | -0.210686691 | 0.82739389 | 0.544705198 | YLR269C   |
| YBL107C   | 10.4560898 | 12.2021657 | 9.07885812 | 9.34232544 | 9.12192992 | 8.97387576  | -0.210772015 | 3.32174471 | 0.202805861 | MIX23     |
| YAR028W   | 20.1230407 | 19.2241666 | 22.4550424 | 16.9699203 | 17.3968235 | 19.0452759  | -0.210789752 | 4.27255204 | 0.101910134 | YAR028W   |
| YDR341C   | 523.067535 | 580.178442 | 515.98177  | 480.774988 | 464.827486 | 453.535807  | -0.210791628 | 8.97500018 | 0.022203489 | YDR341C   |
| YOR386W   | 19.005094  | 19.7997405 | 15.5551102 | 14.4865173 | 18.2438598 | 14.2678169  | -0.210808021 | 4.08881558 | 0.173184914 | PHR1      |
| YDR524W-C | 0.06576157 | 0.11511477 | 0.18157716 | 0.23651457 | 0.06515664 | 0           | -0.210968249 | -2.074654  | 1           | YDR524W-C |
| YML046W   | 79.1111698 | 90.8831111 | 90.9096326 | 74.7977321 | 78.7092239 | 71.9846868  | -0.211076825 | 6.34355644 | 0.018078254 | PRP39     |
| YGL221C   | 110.545201 | 123.230362 | 107.07     | 100.932592 | 98.5168431 | 95.0326987  | -0.211098439 | 6.72832961 | 0.014684236 | NIF3      |
| YJL077C   | 12.0343675 | 11.4539196 | 11.9840927 | 11.5892138 | 8.47036349 | 10.5233219  | -0.211331595 | 3.47829639 | 0.189892005 | ICS3      |
| YLO56W    | 21.1094642 | 24.058987  | 24.936597  | 20.5767674 | 19.1560528 | 20.82529631 | -0.211352661 | 4.45437918 | 0.081186192 | GPM3      |
| YJL148W   | 43.7314446 | 59.7445658 | 49.3889882 | 44.5829961 | 43.1336972 | 44.417457   | -0.211437775 | 5.57458769 | 0.061721546 | RPA34     |
| YGL058W   | 23.9372118 | 32.0019061 | 25.0576484 | 24.7157724 | 22.7396681 | 22.5315298  | -0.211827199 | 4.66212369 | 0.109104223 | RAD6      |
| YDR331W   | 58.0674671 | 65.6729764 | 64.3388412 | 52.3879768 | 52.1904705 | 57.9105508  | -0.211877601 | 5.87200532 | 0.021116984 | GPI8      |
| YOL009C   | 14.862115  | 17.3823303 | 12.8314528 | 13.1856872 | 12.7055452 | 13.041172   | -0.212101334 | 3.82163581 | 0.16661168  | MDM12     |
| YJR015W   | 305.528258 | 249.511265 | 305.533839 | 215.346514 | 245.901168 | 281.611842  | -0.21221721  | 8.06253612 | 0.069192366 | YJR015W   |
| YDR079W   | 7.16801122 | 10.0725424 | 7.5657151  | 5.91971136 | 6.18988101 | 5.68130264  | -0.212234167 | 2.9746588  | 0.355117849 | PT100     |
| YLR052W   | 31.0394614 | 37.8727594 | 31.3523234 | 25.2479301 | 29.7768551 | 31.6345261  | -0.212447201 | 4.96749065 | 0.085925797 | IES3      |
| YBR058C-A | 4.53754839 | 6.73421406 | 4.05522329 | 4.61203408 | 5.53831459 | 3.09889235  | -0.212624574 | 2.29383587 | 0.442410069 | TSC3      |
| YOL133W   | 15.782777  | 21.1811177 | 14.4051215 | 16.2603766 | 14.0086781 | 14.0741361  | -0.21276662  | 4.00950175 | 0.200010399 | HRT1      |
| YER078C   | 51.0967406 | 50.7080563 | 46.4232278 | 42.3361077 | 40.1364916 | 45.3858609  | -0.213087479 | 5.52804119 | 0.024255869 | ICP55     |
| YER031C   | 96.8667939 | 113.963623 | 104.9516   | 95.8475287 | 88.156937  | 88.4475525  | -0.213148862 | 6.61750077 | 0.01743118  | YPT31     |
| YEL007W   | 172.624124 | 160.126465 | 166.748361 | 133.512474 | 148.687458 | 148.553152  | -0.213688002 | 7.27760272 | 0.013869852 | MIT1      |
| YDR063W   | 25.7785358 | 33.9012998 | 25.1786999 | 27.258304  | 23.8473311 | 22.079608   | -0.213839294 | 4.72785593 | 0.125680422 | AIM7      |
| YDL048C   | 96.077655  | 76.3786501 | 110.701543 | 70.363084  | 82.683779  | 91.094523   | -0.213954806 | 6.45921994 | 0.096278556 | STP4      |
| YBR127C   | 969.917409 | 920.572818 | 901.167457 | 826.381901 | 776.341393 | 803.06504   | -0.21456961  | 9.75884005 | 0.018027027 | VMA2      |
| YKL196C   | 74.0475288 | 89.6168487 | 70.3914133 | 66.9336228 | 69.1311974 | 65.7223419  | -0.214659088 | 6.18557357 | 0.031318097 | YKT6      |
| YDR205W   | 154.736976 | 147.116676 | 149.559056 | 131.324714 | 124.709813 | 132.865009  | -0.214824601 | 7.13114161 | 0.008948211 | KTR3      |
| YIL120W   | 21.306749  | 20.4904291 | 20.3366422 | 16.1421193 | 18.1135465 | 19.3035169  | -0.215017255 | 4.27809009 | 0.088552122 | QDR1      |
| YPL279C   | 33.0780701 | 29.0664795 | 34.3786094 | 29.5051924 | 23.9776444 | 29.5685978  | -0.21544055  | 4.90968497 | 0.071679627 | FEX2      |
| YKR035C   | 19.3996634 | 26.1310529 | 21.244528  | 13.1856872 | 20.1985591 | 24.2100965  | -0.215919997 | 4.38217909 | 0.266138092 | OPI8      |
| YGR148C   | 513.860915 | 616.784939 | 487.474155 | 532.749065 | 443.716734 | 416.60734   | -0.216019037 | 8.97162413 | 0.06782974  | RPL24B    |
| YBR272C   | 36.8922413 | 44.9523178 | 38.7364613 | 37.3693018 | 33.8162973 | 32.6029299  | -0.216701061 | 5.23063622 | 0.047469937 | HSM3      |
| YHR005C   | 82.9253409 | 86.6238646 | 80.0755286 | 72.3734578 | 73.040596  | 69.4022766  | -0.216741708 | 6.27689942 | 0.008434864 | GPA1      |
| YPL238C   | 77.6644152 | 105.272457 | 72.5703392 | 101.169106 | 69.6524506 | 49.0012353  | -0.216752508 | 6.311322   | 0.27875262  | YPL238C   |
| YDR339C   | 29.72423   | 40.9808582 | 27.7813058 | 29.8599642 | 27.691573  | 27.2444286  | -0.216786838 | 4.94038035 | 0.124428537 | FCF1      |
| YCR075W-A | 3.68264797 | 4.2592465  | 3.08681176 | 3.01556074 | 3.64877197 | 2.84065132  | -0.217235768 | 1.82778682 | 0.350129299 | YCR075W-A |
| YGL108C   | 5.85277981 | 5.06504989 | 5.74994348 | 5.02593457 | 5.01706145 | 4.26097698  | -0.217317456 | 2.4022319  | 0.250813496 | YGL108C   |
| YIL110W   | 48.268993  | 58.4207459 | 46.0600735 | 39.8527047 | 44.9580832 | 46.677066   | -0.217615249 | 5.57012915 | 0.049758852 | HPM1      |
| YKR051W   | 62.8023002 | 56.8666965 | 60.2836179 | 48.3081005 | 54.8618928 | 51.5836456  | -0.217658942 | 5.80479556 | 0.016898051 | YKR051W   |
| YPR016W-A | 0.460331   | 0.23022954 | 0.06052572 | 0.11825728 | 0.19546993 | 0.32280129  | -0.217745615 | -1.5095326 | 0.843360688 | YPR016W-A |

|           |            |            |            |            |            |            |              |            |             |         |
|-----------|------------|------------|------------|------------|------------|------------|--------------|------------|-------------|---------|
| YHR063C   | 92.0661992 | 115.920574 | 101.622685 | 83.1939993 | 92.5875887 | 90.5780409 | -0.217978822 | 6.58704947 | 0.026296223 | PAN5    |
| YMR143W   | 561.143484 | 554.450291 | 589.09684  | 468.121459 | 491.150769 | 506.087857 | -0.218289504 | 9.04567462 | 0.014909074 | RPS16A  |
| YAL033W   | 17.2952931 | 20.778216  | 17.6129848 | 16.3195052 | 15.3118109 | 16.2691848 | -0.218345578 | 4.12159249 | 0.102655585 | POP5    |
| YDR143C   | 111.79467  | 116.43859  | 114.635715 | 93.0684825 | 101.904988 | 99.8101577 | -0.218445243 | 6.7334183  | 0.007808324 | SAN1    |
| YGR153W   | 5.85277981 | 5.12260728 | 5.08416055 | 4.19813358 | 4.56096496 | 5.03570007 | -0.218601663 | 2.34876815 | 0.251321506 | YGR153W |
| YBR238C   | 136.915591 | 120.467607 | 150.466942 | 97.8579025 | 123.015741 | 129.636997 | -0.218824368 | 6.98299375 | 0.055926904 | YBR238C |
| YNL037C   | 172.163793 | 142.051627 | 156.398463 | 132.448158 | 137.806298 | 133.897974 | -0.219288412 | 7.18890407 | 0.01631153  | IDH1    |
| YGL105W   | 633.81002  | 670.831324 | 590.186303 | 577.568575 | 537.346829 | 512.479322 | -0.219470661 | 9.1976574  | 0.021644217 | ARC1    |
| YGR084C   | 32.5519776 | 40.1750548 | 35.1654438 | 26.1348598 | 30.4933086 | 36.1537441 | -0.219610176 | 5.06946462 | 0.09509661  | MRP13   |
| YCL051W   | 71.6801122 | 68.7810752 | 69.8466818 | 58.2417124 | 61.1820871 | 61.1385636 | -0.220031163 | 6.02833416 | 0.008068689 | LRE1    |
| YBL072C   | 1133.79524 | 1518.82428 | 1182.36996 | 1110.14025 | 1155.29242 | 1026.83089 | -0.220183513 | 10.21436   | 0.061082597 | RPS8A   |
| YKR010C   | 43.1395905 | 48.5208757 | 46.1205992 | 39.5570615 | 39.9410217 | 38.8007146 | -0.220721024 | 5.42021759 | 0.017619326 | TOF2    |
| YGR230W   | 4.20874054 | 6.9644436  | 4.29732618 | 5.55809235 | 3.84424189 | 3.87361544 | -0.221111509 | 2.30632251 | 0.386827817 | BNS1    |
| YMR060C   | 23.0165498 | 30.2176272 | 26.3892143 | 22.4097553 | 23.5867045 | 22.4024093 | -0.221178044 | 4.63330079 | 0.079049059 | SAM37   |
| YOL086C   | 14643.6551 | 11205.8473 | 13960.8022 | 12759.4288 | 11252.9431 | 10136.9288 | -0.221279652 | 13.5895013 | 0.068104438 | ADH1    |
| YIL148W   | 1009.30859 | 1081.10037 | 939.722341 | 920.751213 | 864.954426 | 813.07188  | -0.22153239  | 9.87389713 | 0.023163134 | RPL40A  |
| YNR045W   | 31.6970772 | 33.7286277 | 35.770701  | 29.1504205 | 29.7114289 | 27.9545914 | -0.221607368 | 4.9759926  | 0.031825968 | PET494  |
| YBR277C   | 1.77556241 | 1.43893463 | 1.57366874 | 1.18257284 | 1.62891606 | 1.29120515 | -0.221825576 | 0.67922751 | 0.491850502 | YBR277C |
| YGL070C   | 14.6648303 | 17.2096582 | 13.3156586 | 13.8361022 | 13.9435214 | 10.9752437 | -0.221838033 | 3.82094501 | 0.166050822 | RPB9    |
| YDR320C-A | 6.51039552 | 10.1300998 | 6.17362352 | 5.67634963 | 5.92925445 | 8.0054719  | -0.222182515 | 2.85028565 | 0.351366633 | DAD4    |
| YOR280C   | 23.0823114 | 32.4048078 | 23.2418768 | 21.463697  | 23.5867045 | 22.5315298 | -0.222273951 | 4.6167046  | 0.123625764 | FSH3    |
| YNL030W   | 181.567697 | 280.362023 | 184.906077 | 208.54672  | 174.228861 | 171.665724 | -0.222479016 | 7.64670887 | 0.133264102 | HHF2    |
| YPR185W   | 60.4348836 | 61.6439595 | 60.5862465 | 47.8350714 | 52.9071935 | 55.7800623 | -0.223627271 | 5.8241554  | 0.013271689 | ATG13   |
| YOL097C   | 311.4468   | 343.272245 | 316.428468 | 271.459595 | 280.108405 | 280.191517 | -0.22365325  | 8.23180871 | 0.012040117 | WRS1    |
| YLR306W   | 7.69410379 | 9.32429639 | 7.8683437  | 6.50415062 | 7.88395371 | 6.97250778 | -0.224023408 | 2.97070596 | 0.19499977  | UBC12   |
| YKL053C-A | 6.64191866 | 8.34582085 | 4.72100622 | 8.33713852 | 4.75643489 | 3.74449492 | -0.22408338  | 2.64372619 | 0.459304046 | MDM35   |
| YER051W   | 23.4768808 | 26.0734955 | 22.0313624 | 20.5767674 | 20.3288724 | 20.4010413 | -0.224123448 | 4.47798322 | 0.059266218 | JHD1    |
| YHR067W   | 19.1366171 | 23.9438722 | 21.5471566 | 17.7977212 | 17.4619801 | 20.1428003 | -0.224152335 | 4.33252222 | 0.088519178 | HTD2    |
| YKR083C   | 2.69622441 | 3.28077095 | 3.32891464 | 1.65560198 | 3.64877197 | 2.71153081 | -0.224464613 | 1.58799294 | 0.453763159 | DAD2    |
| YIL124W   | 143.689032 | 136.69879  | 135.274986 | 118.257284 | 119.301812 | 118.145271 | -0.224563289 | 7.00772785 | 0.005504773 | AYR1    |
| YNR009W   | 25.7785358 | 37.7576447 | 28.8102431 | 25.9574738 | 25.867187  | 27.3089888 | -0.224580613 | 4.84480632 | 0.104707033 | NRM1    |
| YOR045C   | 8.02291165 | 7.30978791 | 8.17570379 | 7.45020889 | 5.47315795 | 7.61811036 | -0.224783208 | 2.91879381 | 0.219431587 | GIP1    |
| YGL174W   | 7.10224965 | 8.1155913  | 7.68676654 | 6.20850741 | 6.7762908  | 6.6497065  | -0.224953593 | 2.85216509 | 0.173767896 | BUD13   |
| YDR167W   | 16.1773464 | 19.7997405 | 16.9472018 | 13.1265585 | 14.3996179 | 17.818631  | -0.225455351 | 4.04534689 | 0.147958661 | TAF10   |
| YLR200W   | 6.18158766 | 6.73421406 | 6.47625213 | 5.43983506 | 6.05956773 | 5.10026032 | -0.225826699 | 2.61550095 | 0.208805499 | YKE2    |
| YEL040W   | 572.980567 | 484.863412 | 563.373409 | 430.456514 | 460.136208 | 495.435414 | -0.226094165 | 8.96958371 | 0.024668465 | UTR2    |
| YPR139C   | 45.967338  | 50.7656137 | 47.8758451 | 38.4336173 | 41.3744678 | 43.8364147 | -0.227192956 | 5.48676191 | 0.017613335 | LOA1    |
| YLR294C   | 22.227411  | 35.3402345 | 22.2129395 | 19.15768   | 24.7595241 | 24.339217  | -0.227331857 | 4.63351417 | 0.204171868 | YLR294C |
| YKR058W   | 44.1917756 | 41.9593338 | 44.9706106 | 37.3693018 | 39.159142  | 35.379021  | -0.228284696 | 5.34454669 | 0.016188628 | GLG1    |
| YLR253W   | 69.575742  | 70.7955837 | 69.9072075 | 66.2832077 | 57.3378452 | 55.7800623 | -0.228353244 | 6.02436379 | 0.012496255 | MCP2    |
| YPL283C   | 146.911349 | 118.337984 | 117.419898 | 111.694005 | 125.947789 | 88.8994743 | -0.228457277 | 6.88646269 | 0.067063927 | YRF1-7  |
| YGR296W   | 146.911349 | 118.337984 | 117.419898 | 111.694005 | 125.947789 | 88.8994743 | -0.228457422 | 6.88646269 | 0.067118875 | YRF1-3  |
| YOL070C   | 71.877397  | 71.7165019 | 71.7229791 | 61.9076882 | 59.031979  | 62.8171303 | -0.228497789 | 6.05842084 | 0.005627376 | NBA1    |
| YOR187W   | 619.671282 | 523.714647 | 554.657705 | 488.52084  | 479.031634 | 481.361278 | -0.228793688 | 9.0351017  | 0.015855998 | TUF1    |
| YGR034W   | 653.933061 | 661.6797   | 642.480526 | 612.572731 | 527.899116 | 530.297953 | -0.228861496 | 9.2406822  | 0.016443214 | RPL26B  |
| YJL177W   | 654.656438 | 824.509542 | 658.761945 | 663.837264 | 579.698646 | 580.719514 | -0.228923571 | 9.36747174 | 0.040622666 | RPL17B  |
| YDR005C   | 34.4590631 | 42.0744485 | 36.0128039 | 31.5155662 | 33.1647309 | 31.4408453 | -0.228979146 | 5.1260447  | 0.03389544  | MAF1    |
| YPR046W   | 7.03648808 | 8.97895208 | 5.8104692  | 6.44502198 | 6.18988101 | 6.00410393 | -0.229052289 | 2.78307062 | 0.258817434 | MCM16   |
| YGL162W   | 24.0687349 | 23.310741  | 25.6023799 | 21.8184689 | 20.2637157 | 20.1428003 | -0.229093887 | 4.50256406 | 0.045652687 | SUT1    |
| YCR038C   | 23.4111192 | 23.4258558 | 21.7892595 | 16.4377625 | 20.6234423 | 21.6276862 | -0.229694755 | 4.41408738 | 0.082483785 | BUD5    |
| YLR344W   | 427.121403 | 456.948081 | 439.537784 | 369.435755 | 378.625248 | 380.518156 | -0.230040332 | 8.67537122 | 0.008773376 | RPL26A  |
| YGL005C   | 15.9800617 | 22.9653967 | 17.552459  | 17.2655635 | 15.6375941 | 15.300781  | -0.230394392 | 4.13818859 | 0.138865032 | COG7    |
| YFR007W   | 21.8328415 | 23.0805114 | 20.6392708 | 19.0394227 | 17.9832333 | 18.8515951 | -0.230419917 | 4.34856186 | 0.051913297 | YFH7    |
| YGL129C   | 45.7700533 | 66.9392389 | 53.0205314 | 43.6369378 | 50.2357712 | 47.5163493 | -0.230691824 | 5.68202202 | 0.068677811 | RSM23   |
| YOR011W   | 121.264337 | 92.1493736 | 109.127875 | 84.4357008 | 94.6726012 | 95.613741  | -0.231164273 | 6.63871901 | 0.027501118 | AUS1    |
| YHR144C   | 25.5154895 | 33.6710703 | 28.2655116 | 23.2375563 | 24.1079576 | 27.2444286 | -0.231570063 | 4.76298748 | 0.073178054 | DCD1    |
| YJL214W   | 13.1523142 | 11.2236901 | 12.2867213 | 8.21888124 | 10.8811593 | 12.1373284 | -0.23214488  | 3.51394419 | 0.186805082 | HXT8    |
| YER012W   | 82.8595793 | 114.769426 | 86.9149351 | 81.7157833 | 81.5109595 | 79.0863151 | -0.232435401 | 6.45892543 | 0.040180074 | PRE1    |
| YBR147W   | 5.52397195 | 5.46795159 | 5.74994348 | 3.90249037 | 5.47315795 | 4.90657955 | -0.232751604 | 2.40318157 | 0.243862571 | RTC2    |
| YER158C   | 69.115411  | 60.6654839 | 76.4439854 | 53.1566492 | 57.8590983 | 64.4311367 | -0.233316805 | 5.9938394  | 0.027896175 | YER158C |
| YEL051W   | 107.58593  | 129.791903 | 121.35407  | 107.200228 | 99.9441927 | 98.5189526 | -0.233354842 | 6.79196353 | 0.011172019 | VMA8    |
| YNL194C   | 6.11582609 | 5.46795159 | 5.74994348 | 4.43464815 | 4.30033839 | 6.00410393 | -0.23372457  | 2.45022066 | 0.255520733 | YNL194C |
| YPR036W   | 359.452746 | 373.950331 | 356.193867 | 300.728273 | 307.474195 | 318.217508 | -0.234124321 | 8.39289918 | 0.007542093 | VMA13   |
| YOL067C   | 19.005094  | 17.1521008 | 18.8234992 | 13.4222017 | 18.0483899 | 15.300781  | -0.234236964 | 4.09349371 | 0.107056389 | RTG1    |
| YLR177W   | 81.21554   | 74.4792564 | 77.3518712 | 64.4502198 | 64.3747626 | 69.2085958 | -0.234566359 | 6.16930239 | 0.005413281 | YLR177W |
| YLR412W   | 26.5019131 | 37.066956  | 25.7839571 | 23.0601704 | 26.3884401 | 26.598826  | -0.234606674 | 4.79247705 | 0.107929161 | BER1    |
| YPL035C   | 2.17013184 | 3.62611526 | 2.42102883 | 2.83817482 | 2.47595241 | 1.67856669 | -0.234620134 | 1.42109266 | 0.425796861 | YPL035C |
| YGR082W   | 119.423013 | 110.913081 | 126.135602 | 98.3309317 | 107.769086 | 96.8403859 | -0.234726495 | 6.78169817 | 0.007612332 | TM020   |
| YLR227C   | 24.2660196 | 32.5199226 | 28.7497174 | 19.4533232 | 25.867187  | 27.5026696 | -0.23473168  | 4.72944057 | 0.117586442 | ADY4    |
| YBL005W   | 100.549442 | 93.1278492 | 97.4464105 | 80.6514677 | 83.7262853 | 82.9599306 | -0.234958582 | 6.48971302 | 0.003869869 | PDR3    |
| YDL079C   | 22.4246957 | 19.281724  | 20.2155907 | 18.9802941 | 17.1361969 | 16.3983053 | -0.235288183 | 4.26294908 | 0.068496515 | MRK1    |
| YDR344C   | 3.68264797 | 2.24473802 | 3.38944036 | 2.12863111 | 2.60626569 | 3.16345261 | -0.235435312 | 1.57485096 | 0.376282807 | YDR344C |
| YBR218C   | 533.786671 | 457.984114 | 528.692171 | 439.444067 | 435.702467 | 416.155418 | -0.235580195 | 8.87267205 | 0.013512    | PYC2    |

|           |            |            |            |            |             |            |              |            |             |           |
|-----------|------------|------------|------------|------------|-------------|------------|--------------|------------|-------------|-----------|
| YDR472W   | 40.0487967 | 48.0604166 | 40.6127587 | 34.0580978 | 36.6831896  | 38.6715941 | -0.235993028 | 5.31570445 | 0.027729436 | TRS31     |
| YFL034C-A | 23.7399271 | 34.1890868 | 23.6050311 | 25.8392166 | 23.5215479  | 19.8845592 | -0.236307265 | 4.66076378 | 0.136351677 | RPL22B    |
| YCR046C   | 67.0768023 | 60.5503692 | 65.3072527 | 57.2956541 | 53.7542299  | 52.6166097 | -0.23633582  | 5.89631565 | 0.007204915 | IMG1      |
| YNL066W   | 483.281784 | 379.648512 | 477.668989 | 386.22829  | 379.016188  | 372.512684 | -0.236547242 | 8.69060572 | 0.024812251 | SUN4      |
| YBR184W   | 4.66907153 | 7.3673453  | 5.14468627 | 5.2033205  | 5.0822181   | 4.32553724 | -0.237033167 | 2.44508281 | 0.300525665 | YBR184W   |
| YBR291C   | 24.1344965 | 25.4403642 | 23.6050311 | 18.4481363 | 20.5243423  | 23.1771324 | -0.237205465 | 4.50334288 | 0.055494972 | CTP1      |
| YNL070W   | 4.86635624 | 3.51100049 | 3.99469757 | 2.9564321  | 4.1700251   | 3.35713338 | -0.237336468 | 1.970793   | 0.30869335  | TOM7      |
| YNR032C-A | 1.70980084 | 2.24473802 | 1.81577162 | 1.41908741 | 1.62891606  | 1.87224746 | -0.237867959 | 0.93298868 | 0.427837288 | HUB1      |
| YPL013C   | 11.5740365 | 13.9288872 | 13.6182872 | 11.4709566 | 10.9463159  | 10.781563  | -0.238019958 | 3.60830919 | 0.108897251 | MRPS16    |
| YBR251W   | 24.2002581 | 26.6490693 | 26.5707914 | 23.5331995 | 22.5441982  | 19.561758  | -0.238026512 | 4.58415804 | 0.046579232 | MRPS5     |
| YGR158C   | 37.7471417 | 45.6430064 | 40.7943358 | 34.7085129 | 39.0939854  | 31.5699658 | -0.238118749 | 5.2631476  | 0.03563698  | MTR3      |
| YDR494W   | 30.2503226 | 37.2396282 | 30.6260147 | 25.3661874 | 29.9068988  | 28.0191517 | -0.238286023 | 4.92468007 | 0.047287522 | RSM28     |
| YKL080W   | 619.14519  | 576.49477  | 638.364777 | 500.110054 | 514.411691  | 540.175673 | -0.238357918 | 9.14187    | 0.009264906 | VMA5      |
| YHR051W   | 76.4807069 | 91.458685  | 76.5045111 | 80.6514677 | 68.9357275  | 57.5877495 | -0.238407438 | 6.23710075 | 0.044708369 | COX6      |
| YLR066W   | 21.7013184 | 27.7426596 | 21.0629508 | 19.0985514 | 21.4365353  | 19.3035169 | -0.238573651 | 4.45064745 | 0.081593579 | SPC3      |
| YGR108W   | 142.702609 | 170.887876 | 151.072199 | 135.936748 | 129.857188  | 128.08755  | -0.238663234 | 7.16231119 | 0.008960567 | CLB1      |
| YOR028C   | 6.90496494 | 11.9719361 | 7.98939514 | 8.51452445 | 8.53552014  | 5.7458629  | -0.238913615 | 3.07673592 | 0.31701175  | CIN5      |
| YPL143W   | 936.773577 | 907.219505 | 924.530385 | 776.77297  | 762.463028  | 805.64745  | -0.239588636 | 9.73532509 | 0.007283882 | RPL33A    |
| YNL143C   | 0.32880785 | 0.46045908 | 0.90788581 | 0.59128642 | 0.26062657  | 0.58104232 | -0.239961548 | -0.6212227 | 0.713409191 | YNL143C   |
| YPR015C   | 3.22231697 | 2.87786926 | 2.48155455 | 1.8329879  | 2.34563912  | 3.09889235 | -0.240156563 | 1.46436865 | 0.373781087 | YPR015C   |
| YLR388W   | 4.66907153 | 2.99298403 | 3.08681176 | 2.89730346 | 2.9320489   | 3.22801286 | -0.240176688 | 1.77086611 | 0.32380933  | RPS29A    |
| YOL121C   | 261.533767 | 344.883852 | 272.002589 | 232.730335 | 259.06281   | 251.978684 | -0.240320022 | 8.07956534 | 0.031967245 | RPS19A    |
| YDR524C   | 55.8973352 | 63.9462549 | 61.9178124 | 45.8838262 | 56.0347123  | 52.1001276 | -0.240360755 | 5.50981576 | 0.016616975 | AGE1      |
| YJR012C   | 11.2452286 | 16.4614122 | 12.4682985 | 12.1213716 | 11.0766292  | 10.8461232 | -0.240616211 | 3.64673107 | 0.166890371 | YJR012C   |
| YBR124W   | 4.14297896 | 3.62611526 | 3.2078632  | 2.36514568 | 3.32298876  | 3.61537441 | -0.240775532 | 1.80493941 | 0.321106275 | YBR124W   |
| YMR263W   | 12.1658906 | 14.6771332 | 11.7419898 | 11.5892138 | 9.38255649  | 11.6854066 | -0.240920327 | 3.58708733 | 0.14605124  | SAP30     |
| YOR249C   | 26.5019131 | 35.1100049 | 24.7550198 | 25.1888015 | 25.3459338  | 22.59609   | -0.241020139 | 4.74065593 | 0.083957152 | APC5      |
| YOL093W   | 26.8964825 | 24.1741018 | 29.3549746 | 23.8879714 | 21.2410654  | 22.8543311 | -0.241155462 | 4.63603599 | 0.043224875 | TRM10     |
| YLR448W   | 701.21563  | 806.148736 | 696.045789 | 668.390169 | 578.395513  | 616.679577 | -0.241746563 | 9.40506834 | 0.016175389 | RPL6B     |
| YMR298W   | 77.7301768 | 77.5873552 | 67.6677558 | 61.6711736 | 65.6778954  | 61.1385636 | -0.242496276 | 6.10236977 | 0.007289599 | LIP1      |
| YPL168W   | 19.7284713 | 21.1811177 | 19.3077049 | 16.6151484 | 17.3316668  | 16.9793477 | -0.24257886  | 4.22160155 | 0.049781646 | YPL168W   |
| YIL162W   | 168.152337 | 118.913558 | 151.011673 | 115.596495 | 122.429331  | 132.154847 | -0.242618181 | 7.07474824 | 0.036270465 | SUC2      |
| YLR385C   | 4.47178682 | 2.99298403 | 3.87364613 | 2.06950247 | 2.9320489   | 4.58377827 | -0.242961858 | 1.84469517 | 0.401519034 | SWC7      |
| YDR541C   | 34.9851557 | 29.7571681 | 34.7417637 | 26.9626608 | 26.1278135  | 30.9243632 | -0.243122949 | 4.9402054  | 0.03451562  | YDR541C   |
| YER053C   | 33.2753549 | 34.3042015 | 32.3812606 | 28.9139059 | 27.9521995  | 27.5672299 | -0.243330849 | 4.94801495 | 0.015121296 | PIC2      |
| YER146W   | 17.0322469 | 16.6340843 | 15.6761617 | 14.8412891 | 13.291955   | 13.4930938 | -0.243783962 | 3.93491084 | 0.067889746 | LSM5      |
| YOR084C-A | 740.54105  | 856.166104 | 758.084653 | 666.20241  | 648.308591  | 674.202767 | -0.243810326 | 9.49997283 | 0.010187985 | RPL19A    |
| YGL076C   | 1737.4207  | 1876.48587 | 1628.02084 | 1450.2482  | 1447.45481  | 1528.27041 | -0.244116027 | 10.6541467 | 0.010233194 | RPL7A     |
| YKL180W   | 1282.21911 | 1377.17555 | 1306.68979 | 1139.23155 | 1129.55555  | 1079.70574 | -0.244211553 | 10.251763  | 0.007303853 | RPL17A    |
| YMR193C-A | 10.4560898 | 10.5905589 | 8.95780668 | 7.27282297 | 8.014267    | 10.0714001 | -0.244211957 | 3.22460817 | 0.172334377 | YMR193C-A |
| YOL077C   | 97.8532174 | 138.080167 | 112.154161 | 103.475124 | 101.839832  | 88.576673  | -0.244591435 | 6.74366751 | 0.037326629 | BRX1      |
| YPR073C   | 17.4268163 | 26.2461676 | 19.7919107 | 20.6950247 | 17.4619801  | 15.4299015 | -0.244689228 | 4.29848675 | 0.147477463 | LTP1      |
| YML036W   | 22.1616494 | 24.9223478 | 21.6076823 | 19.9263524 | 17.5271368  | 20.5301618 | -0.244750865 | 4.40961917 | 0.049511017 | CGH121    |
| YMR073C   | 24.6605891 | 30.9658732 | 22.5155681 | 20.7541533 | 22.6745115  | 22.59609   | -0.244770071 | 4.59504223 | 0.071295965 | IRC21     |
| YNL162W   | 318.15448  | 477.726297 | 314.975851 | 304.275992 | 307.148412  | 326.15842  | -0.244813066 | 8.41604767 | 0.078644716 | RPL42A    |
| YAL038W   | 15438.1206 | 12987.1908 | 15530.4763 | 12460.9474 | 12126.8891  | 12506.613  | -0.244846565 | 13.7215787 | 0.014490442 | CDC19     |
| YBL029W   | 21.8986031 | 20.8933308 | 20.4576936 | 20.3402529 | 18.8302696  | 14.1386963 | -0.24491944  | 4.29008676 | 0.093420874 | YBL029W   |
| YLR154W-A | 14.862115  | 6.56154191 | 14.7077502 | 11.1161847 | 7.88395371  | 11.4271655 | -0.245165682 | 3.48475507 | 0.371767194 | YLR154W-A |
| YOR135C   | 29.8557532 | 30.7356437 | 31.4128491 | 24.2427432 | 23.71170178 | 29.6977183 | -0.245293286 | 4.82812285 | 0.036908242 | IRC14     |
| YHR035W   | 13.0865526 | 15.8282809 | 15.4945845 | 11.5892138 | 11.3372558  | 14.5906181 | -0.24544761  | 3.78570963 | 0.123167073 | NEL1      |
| YER081W   | 90.7509678 | 97.6748826 | 98.5358735 | 81.3610114 | 81.7064294  | 79.0217549 | -0.245598683 | 6.46458468 | 0.002819284 | SER3      |
| YLR068W   | 8.3517195  | 11.2812475 | 9.26043528 | 7.62759482 | 7.23238729  | 9.55491807 | -0.245974097 | 3.17395778 | 0.192692423 | FV7       |
| YNR003C   | 30.9736999 | 33.2106112 | 31.8970549 | 24.1244859 | 30.8842484  | 26.0823439 | -0.246305264 | 4.89018682 | 0.034946477 | RPC34     |
| YER112W   | 19.9915175 | 26.4763972 | 24.6944941 | 17.0881775 | 20.394029   | 22.59609   | -0.247057392 | 4.46022512 | 0.090808259 | LSM4      |
| YOL135C   | 16.243108  | 18.0154615 | 17.0682533 | 14.7230319 | 14.6602445  | 13.8804553 | -0.247163365 | 3.99121165 | 0.05871322  | MED7      |
| YBR254C   | 13.8756915 | 18.9363797 | 16.2208932 | 14.1908741 | 11.9236655  | 15.2362207 | -0.247313578 | 3.92749594 | 0.127372238 | TRS20     |
| YMR211W   | 23.0823114 | 33.7286277 | 27.6602544 | 22.9419131 | 23.5215479  | 24.7911388 | -0.247603446 | 4.70649492 | 0.074891829 | DML1      |
| YGL251C   | 24.3975428 | 25.2101347 | 23.2418768 | 20.0446096 | 20.589499   | 20.7238426 | -0.248073641 | 4.49175651 | 0.028141262 | HFM1      |
| YJL011C   | 6.57615709 | 10.2452146 | 7.68676654 | 7.68672346 | 6.84144744  | 6.13322444 | -0.248265514 | 2.94157411 | 0.219649229 | RPC17     |
| YGR271C-A | 10.1930435 | 15.1951497 | 12.1656699 | 9.69709729 | 10.2295928  | 11.7499668 | -0.248496206 | 3.5465525  | 0.172874933 | EFG1      |
| YKL214C   | 21.0437027 | 26.6490693 | 23.0602996 | 21.1089252 | 19.0257395  | 19.4326374 | -0.249131291 | 4.45100212 | 0.051534781 | YRA2      |
| YHR128W   | 144.215125 | 133.82092  | 147.622233 | 112.048777 | 120.930728  | 125.117779 | -0.249421549 | 7.03063041 | 0.003798496 | FUR1      |
| YBR185C   | 36.8922413 | 35.9733657 | 40.0680272 | 30.7468938 | 30.3629953  | 33.8941351 | -0.249573935 | 5.12039166 | 0.014441745 | MBA1      |
| YJR101W   | 46.5591922 | 56.2911227 | 48.6626795 | 41.0944062 | 44.1762035  | 42.2869685 | -0.249589492 | 5.54395248 | 0.012588879 | RSM26     |
| YBR037C   | 37.9444264 | 38.4483333 | 36.9206897 | 34.1172264 | 34.2072372  | 26.9216273 | -0.249982111 | 5.12505276 | 0.026325661 | SC01      |
| YJL137C   | 23.9372118 | 24.4043313 | 22.8787225 | 19.0394227 | 22.4138849  | 18.4642336 | -0.250018823 | 4.45831901 | 0.041793515 | GLG2      |
| YEL047C   | 309.408191 | 235.697492 | 309.225908 | 228.650459 | 240.362853  | 249.267153 | -0.25011149  | 8.03457119 | 0.025375439 | FRD1      |
| YDR025W   | 793.939445 | 1004.31881 | 833.983907 | 618.071695 | 632.3621286 | 682.395917 | -0.250319538 | 9.6576619  | 0.051255321 | RPS11A    |
| YJR122W   | 32.6177391 | 39.0814645 | 34.5601866 | 30.1556074 | 29.3856457  | 29.8268389 | -0.250776757 | 5.03343838 | 0.019205455 | IBA57     |
| YDR089W   | 173.281739 | 170.254745 | 170.86411  | 147.348576 | 142.367263  | 142.484488 | -0.251045108 | 7.30286881 | 0.002175125 | YDR089W   |
| YCR012W   | 9558.24704 | 7194.3278  | 9158.26786 | 7418.92984 | 7022.90869  | 7324.49031 | -0.251450189 | 12.9560684 | 0.026176491 | PGK1      |
| YOR164C   | 115.937649 | 144.008578 | 119.417247 | 119.972015 | 103.468748  | 95.2263795 | -0.251514241 | 6.86421244 | 0.020543508 | GET4      |
| YCL050C   | 212.344112 | 257.511741 | 214.200526 | 194.237589 | 192.993974  | 187.418427 | -0.251623688 | 7.71379822 | 0.010445131 | APA1      |

|           |            |            |            |            |            |            |              |            |             |           |
|-----------|------------|------------|------------|------------|------------|------------|--------------|------------|-------------|-----------|
| YPL241C   | 22.1616494 | 25.555479  | 23.3629282 | 17.502078  | 22.0881017 | 20.2073605 | -0.25175934  | 4.45568554 | 0.050447769 | CIN2      |
| YKL132C   | 18.9393324 | 16.5189695 | 17.3708819 | 15.3143183 | 14.3344613 | 14.6551784 | -0.251884487 | 4.02794353 | 0.053935301 | RMA1      |
| YDL082W   | 596.260163 | 757.742975 | 586.675812 | 576.326874 | 535.848226 | 517.644143 | -0.251888899 | 9.21733524 | 0.024344602 | RPL13A    |
| YNL153C   | 17.4925779 | 22.9078393 | 19.3077049 | 18.5072649 | 15.4421242 | 16.2046246 | -0.252058408 | 4.20683934 | 0.082037991 | GIM3      |
| YDR347W   | 94.5651389 | 88.177914  | 90.8491069 | 76.1576909 | 77.8621875 | 75.6000613 | -0.252472712 | 6.39221849 | 0.001780069 | MRP1      |
| YDR451C   | 38.3389958 | 49.3842365 | 38.8575128 | 33.2302968 | 36.2922497 | 36.7993466 | -0.253241035 | 5.28399045 | 0.029704813 | YHP1      |
| YLR447C   | 358.137515 | 432.486192 | 376.651561 | 321.009397 | 340.117673 | 318.152948 | -0.253505499 | 8.48343981 | 0.009500008 | VMA6      |
| YPL211W   | 30.7106536 | 51.2260728 | 36.0128039 | 28.4408768 | 34.9239603 | 35.7018223 | -0.253584179 | 5.18296983 | 0.119941076 | NIP7      |
| YJR135W-A | 10.4560898 | 10.8783458 | 10.7735783 | 7.27282297 | 9.31739984 | 10.3942014 | -0.253670682 | 3.31739117 | 0.142317351 | TIM8      |
| YEL066W   | 22.4904572 | 28.6635778 | 22.757671  | 22.6462699 | 18.3741731 | 20.9175234 | -0.255282874 | 4.51077083 | 0.061680189 | HPA3      |
| YCR018C-A | 66.1561403 | 76.7815518 | 63.733584  | 63.267647  | 59.2925445 | 50.5506814 | -0.255571218 | 5.98752888 | 0.016075525 | YCR018C-A |
| YBR144C   | 0.06576157 | 0.17267216 | 0.06052572 | 0          | 0.13031328 | 0.12912051 | -0.255596457 | -2.2053708 | 1           | YBR144C   |
| YGR111W   | 56.8837588 | 62.6799924 | 46.5442793 | 51.0871467 | 43.9155769 | 44.0946557 | -0.25559689  | 5.67283142 | 0.027684322 | YGR111W   |
| YLR244C   | 365.634334 | 412.974238 | 368.420062 | 324.793631 | 312.947353 | 323.059527 | -0.255661949 | 8.45717564 | 0.005288234 | MAP1      |
| YIR001C   | 20.5176101 | 28.4909056 | 23.1208253 | 19.6307091 | 20.1334025 | 20.7238426 | -0.256107086 | 4.47599034 | 0.062440941 | SGN1      |
| YHL021C   | 98.5765947 | 84.7820283 | 91.7569927 | 81.8340405 | 73.952789  | 74.3734164 | -0.256393088 | 6.39812653 | 0.004106564 | AIM17     |
| YMR242C   | 686.353515 | 762.577796 | 695.864212 | 690.445153 | 565.755125 | 539.142708 | -0.256528115 | 9.35941684 | 0.018552673 | RPL20A    |
| YPR170W-B | 35.7742946 | 30.8507584 | 31.2312719 | 23.4149422 | 29.2553324 | 29.2457965 | -0.256853614 | 4.91019926 | 0.033842933 | YPR170W-B |
| YBR082C   | 179.200281 | 236.963755 | 171.408841 | 155.626586 | 159.11252  | 177.088786 | -0.256932483 | 7.49226799 | 0.031876331 | UBC4      |
| YDL192W   | 294.217268 | 374.928807 | 306.018044 | 256.44092  | 281.281225 | 278.44839  | -0.25701445  | 8.22257206 | 0.015500533 | ARF1      |
| YMR178W   | 39.4569425 | 47.7726297 | 37.5259469 | 33.7624546 | 34.0769239 | 36.6056659 | -0.257473639 | 5.26088969 | 0.02165229  | YMR178W   |
| YDL118W   | 3.6168864  | 1.89939371 | 2.23945167 | 1.47821605 | 2.54110905 | 2.45328978 | -0.257607408 | 1.30701755 | 0.403446526 | YDL118W   |
| YDL211C   | 27.5540982 | 26.2461676 | 30.2628604 | 23.0010417 | 24.042801  | 23.2416926 | -0.258216601 | 4.69222585 | 0.020963271 | YDL211C   |
| YKR055W   | 21.76708   | 30.2751846 | 24.0287112 | 18.5663936 | 23.6518611 | 21.4985657 | -0.258340532 | 4.55094889 | 0.079454878 | RHO4      |
| YFL017C   | 42.0874054 | 47.4272854 | 49.2679367 | 43.0456514 | 37.0089728 | 35.895503  | -0.259009147 | 5.41306378 | 0.014455915 | GNA1      |
| YKL193C   | 35.4454867 | 43.3982684 | 35.7101753 | 37.4284304 | 32.2525379 | 26.0177837 | -0.259092863 | 5.13763186 | 0.054910401 | SDS22     |
| YDR023W   | 601.521089 | 709.567444 | 605.378259 | 569.645337 | 531.156948 | 500.600235 | -0.259129663 | 9.19590373 | 0.010323822 | SES1      |
| YOR315W   | 167.494721 | 201.796192 | 168.685184 | 176.735511 | 150.96794  | 121.760645 | -0.259220411 | 7.36404574 | 0.039477262 | SFG1      |
| YLR342W-A | 0          | 0.05755739 | 0.24210288 | 0.11825728 | 0.06515664 | 0.06456026 | -0.259289733 | -2.2056687 | 1           | YLR342W-A |
| YNL057W   | 10.8506592 | 10.5905589 | 11.6814641 | 7.15456568 | 10.0341229 | 10.5233219 | -0.259931091 | 3.35813114 | 0.147204835 | YNL057W   |
| YDL127W   | 45.8358149 | 63.3131237 | 50.7810797 | 40.3257339 | 44.3716734 | 49.0012353 | -0.260023621 | 5.61727642 | 0.034204108 | PCL2      |
| YNR028W   | 58.8566059 | 69.644436  | 53.6257886 | 50.9688894 | 48.4113852 | 52.7457302 | -0.260182285 | 5.80358973 | 0.013489957 | CPR8      |
| YPL065W   | 14.6648303 | 22.7927245 | 16.0998417 | 15.196061  | 15.3769676 | 14.2032566 | -0.260413234 | 4.04855721 | 0.130645156 | VPS28     |
| YPL079W   | 536.28561  | 741.684465 | 563.494461 | 563.495958 | 508.743063 | 465.027533 | -0.260526094 | 9.13774529 | 0.037944512 | RPL21B    |
| YJR050W   | 10.1930435 | 11.6265918 | 10.9551555 | 9.34232544 | 9.31739984 | 8.71563473 | -0.260648175 | 3.34518557 | 0.084524301 | ISY1      |
| YOR115C   | 19.8599944 | 25.0950199 | 22.757671  | 20.4585101 | 19.7424626 | 16.3337451 | -0.26092483  | 4.38272206 | 0.057759364 | TRS33     |
| YHL004W   | 103.245666 | 107.459638 | 107.977886 | 79.3506376 | 90.0464796 | 96.6467051 | -0.261101914 | 6.60852438 | 0.004196386 | MRP4      |
| YCR086W   | 7.82562693 | 10.763231  | 9.19990956 | 9.04668223 | 7.75364043 | 6.39146547 | -0.261138462 | 3.11274109 | 0.173760117 | CSM1      |
| YKL042W   | 25.6470126 | 26.1310529 | 29.8997061 | 24.8340296 | 23.3912346 | 19.8845592 | -0.26136816  | 4.64996591 | 0.036125663 | SPC42     |
| YDR426C   | 2.89350912 | 2.82031187 | 2.66313171 | 2.12863111 | 1.88954263 | 2.96977183 | -0.26175524  | 1.42467779 | 0.323050896 | YDR426C   |
| YBL052C   | 86.0818963 | 86.9116516 | 83.6465461 | 72.5508437 | 72.2587163 | 69.2085958 | -0.261885491 | 6.29604301 | 0.001159412 | SAS3      |
| YGL234W   | 1941.15005 | 1518.19115 | 1871.69739 | 1396.5594  | 1489.28537 | 1559.32389 | -0.262160291 | 10.6701905 | 0.016592536 | ADE5,7    |
| YOL071W   | 13.3495989 | 13.007969  | 12.6498756 | 11.5892138 | 10.4250628 | 10.4587617 | -0.262278443 | 3.59047736 | 0.067374909 | SDH5      |
| YNR042W   | 17.6898626 | 12.7201821 | 15.4945845 | 16.023862  | 12.1842921 | 9.94227962 | -0.263105804 | 3.82145257 | 0.163437621 | YNR042W   |
| YKL086W   | 1.38099299 | 1.78427894 | 1.63419446 | 1.71473062 | 1.43344613 | 0.83928334 | -0.263217141 | 0.67656894 | 0.391871881 | SRX1      |
| YPR132W   | 422.38657  | 655.923961 | 440.203567 | 436.901536 | 430.229309 | 398.013986 | -0.263453042 | 8.85835221 | 0.064084662 | RPS23B    |
| YHL018W   | 6.18158766 | 4.2592465  | 5.44731487 | 4.49377679 | 4.88674817 | 3.80905518 | -0.263480526 | 2.31078835 | 0.211925071 | YHL018W   |
| YGL254W   | 15.6512539 | 20.2601996 | 17.1893047 | 12.4170148 | 14.9860277 | 16.9147874 | -0.263889013 | 4.03312224 | 0.097346688 | FZF1      |
| YKL115W   | 84.437857  | 97.0993087 | 82.5570832 | 69.0622539 | 74.0831023 | 76.8912664 | -0.264105394 | 6.33675504 | 0.004104976 | SNF4      |
| YJR034W   | 3.6168864  | 4.89237774 | 3.26838892 | 4.02074766 | 3.51845868 | 2.259609   | -0.264236456 | 1.90255968 | 0.316265335 | PET191    |
| YOR304C-A | 2.30165498 | 2.41741018 | 1.99734879 | 1.89211654 | 1.62891606 | 2.06592823 | -0.264322783 | 1.1227725  | 0.336750687 | BIL1      |
| YGL186C   | 233.322053 | 194.14106  | 230.663522 | 171.650448 | 181.852189 | 194.390935 | -0.264370634 | 7.65188094 | 0.008068415 | TPN1      |
| YEL053W-A | 603.033605 | 648.959517 | 645.627864 | 496.266692 | 529.984128 | 553.668766 | -0.264424538 | 9.17922409 | 0.004129029 | YEL053W-A |
| YDR086C   | 11.1137055 | 18.9939371 | 12.0446184 | 14.7230319 | 11.0766292 | 9.29667705 | -0.264568054 | 3.70624211 | 0.240695834 | SSS1      |
| YGR065C   | 73.5214362 | 69.1264196 | 77.7150255 | 58.8921274 | 62.3549066 | 62.1715277 | -0.264791335 | 6.0751496  | 0.002209312 | VHT1      |
| YDR493W   | 6.57615709 | 9.32429639 | 8.29202375 | 7.56846618 | 6.25503766 | 6.32690521 | -0.264925802 | 2.91489093 | 0.160344767 | MZM1      |
| YGR044C   | 49.9130323 | 60.0323527 | 47.8758451 | 43.3412946 | 43.4594804 | 44.6111378 | -0.265068688 | 5.59545978 | 0.010248571 | RME1      |
| YGR085C   | 315.787063 | 452.170818 | 324.781018 | 299.663958 | 291.966914 | 317.571905 | -0.265436151 | 8.38293235 | 0.036085478 | RPL11B    |
| YDR260C   | 20.5833717 | 19.6270683 | 18.7629734 | 16.851663  | 16.3543172 | 15.817263  | -0.265470221 | 4.18018265 | 0.032300389 | SWM1      |
| YOR394W   | 0.13152314 | 0.34534431 | 0.12105144 | 0.11825728 | 0.13031328 | 0.25824103 | -0.26560681  | -1.6911352 | 0.824382678 | PAU21     |
| YPL282C   | 0.13152314 | 0.34534431 | 0.12105144 | 0.11825728 | 0.13031328 | 0.25824103 | -0.265611888 | -1.6911352 | 0.824371477 | PAU22     |
| YJR103W   | 110.216393 | 92.8976196 | 108.885772 | 91.1172373 | 88.4175636 | 79.8610382 | -0.265673019 | 6.57526663 | 0.005020261 | URA8      |
| Q0070     | 0.19728471 | 0          | 0.12105144 | 0.17738593 | 0.06515664 | 0          | -0.266305903 | -2.2052824 | 1           | A15 ALPHA |
| YLR111W   | 0.39456943 | 0.57557385 | 0.60525721 | 0.7095437  | 0.26062657 | 0.32280129 | -0.266592845 | -0.7162916 | 0.694168949 | YLR111W   |
| YBR048W   | 956.041717 | 913.608374 | 969.44047  | 659.580002 | 804.684532 | 895.709009 | -0.266706434 | 9.75926157 | 0.018276266 | RPS11B    |
| YLR123C   | 1.38099299 | 1.03603293 | 0.78683437 | 0.65041506 | 0.58640978 | 1.42032566 | -0.266773405 | 0.13121131 | 0.520519617 | YLR123C   |
| YER155C   | 461.383181 | 424.60083  | 442.866699 | 345.547784 | 393.155179 | 365.281936 | -0.267471967 | 8.6638828  | 0.003915093 | BEM2      |
| YOR143C   | 18.3474783 | 26.6490693 | 20.3366422 | 17.2064348 | 18.1787032 | 18.9807156 | -0.267515202 | 4.32923763 | 0.077430789 | THI80     |
| YDL240W   | 111.465863 | 119.08623  | 112.396264 | 83.4305139 | 99.0380962 | 102.521689 | -0.267777354 | 6.71125576 | 0.004330383 | LRG1      |
| YDR322W   | 49.9787939 | 57.384713  | 46.181125  | 42.454365  | 43.3943237 | 41.7059262 | -0.268165441 | 5.55432551 | 0.007987455 | MRPL35    |
| YNL019C   | 5.98430295 | 3.56855788 | 5.02363483 | 4.25726222 | 3.77908525 | 4.00273595 | -0.268506607 | 2.18563353 | 0.227053166 | YNL019C   |
| YJL090C   | 42.6792595 | 52.3772205 | 45.6363935 | 37.0736585 | 40.3971182 | 39.4463172 | -0.268602554 | 5.42889537 | 0.009168828 | DPB11     |
| YPR006C   | 15.0593997 | 19.9148553 | 15.2524816 | 16.1421193 | 11.7933522 | 13.7513348 | -0.268679818 | 3.95216632 | 0.109478397 | ICL2      |

|           |            |            |            |            |            |             |              |            |             |           |
|-----------|------------|------------|------------|------------|------------|-------------|--------------|------------|-------------|-----------|
| YBR128C   | 7.56258065 | 7.07955837 | 8.35254947 | 6.74066519 | 5.01706145 | 7.29530907  | -0.2692408   | 2.8356814  | 0.15203269  | ATG14     |
| YPL268W   | 59.5142216 | 66.1334355 | 61.0099266 | 52.2105909 | 54.275483  | 48.4201929  | -0.269470324 | 5.83462948 | 0.00290027  | PLC1      |
| YLR154C   | 9.27238149 | 11.1661327 | 8.11044659 | 8.57365309 | 6.97176072 | 8.13459242  | -0.269631788 | 3.14524933 | 0.13480466  | RNH203    |
| YBR010W   | 147.568965 | 209.681554 | 156.761617 | 164.318496 | 138.913961 | 122.98729   | -0.27026878  | 7.29356268 | 0.043997635 | HHT1      |
| YLL053C   | 7.8913885  | 5.69818113 | 5.38678915 | 4.55290543 | 5.92925445 | 5.22938084  | -0.270287381 | 2.55772459 | 0.204378224 | YLL053C   |
| YGR104C   | 16.703439  | 19.6846257 | 14.949853  | 13.0083012 | 14.5950879 | 14.9779797  | -0.271726955 | 3.98063573 | 0.067857499 | SRB5      |
| YNL303W   | 0.460331   | 0.97847555 | 0.36315432 | 0.53215778 | 0.52125314 | 0.4519218   | -0.271809978 | -0.5544259 | 0.632652248 | YNL303W   |
| YER074W   | 686.419277 | 950.502658 | 689.266908 | 705.463828 | 637.101648 | 584.012087  | -0.27195693  | 9.4695751  | 0.03563866  | RPS24A    |
| YIL127C   | 17.7556241 | 19.4543962 | 18.7629734 | 14.3091314 | 15.8982207 | 16.2046246  | -0.272046767 | 4.10394344 | 0.0353629   | RRT14     |
| YBL027W   | 1187.45669 | 1382.93129 | 1170.56744 | 1167.96807 | 1004.19417 | 924.761125  | -0.272556051 | 10.1545738 | 0.01483314  | RPL19B    |
| YDR515W   | 18.6105246 | 18.7637076 | 18.8840249 | 15.1369324 | 14.1389914 | 17.3021489  | -0.272585054 | 4.11017041 | 0.038770545 | SLF1      |
| YKR020W   | 8.61476578 | 8.86383731 | 9.0183324  | 7.09543704 | 6.84144744 | 8.0054719   | -0.272717525 | 3.03607953 | 0.092155898 | VPS51     |
| YML077W   | 16.3088696 | 29.1240369 | 20.4576936 | 18.6255222 | 17.2665102 | 18.7224746  | -0.272722374 | 4.34026188 | 0.1331578   | BET5      |
| YDR071C   | 48.9923703 | 77.7600273 | 52.4152742 | 50.7915035 | 52.0601572 | 45.5149814  | -0.273010264 | 5.77506952 | 0.061418617 | PAA1      |
| YER097W   | 0.39456943 | 0.46045908 | 0.36315432 | 0.23651457 | 0.39093985 | 0.38736154  | -0.273153578 | -1.0126716 | 0.645954444 | YER097W   |
| YPR009W   | 27.4225751 | 34.2466442 | 32.2602092 | 23.2375563 | 25.3459338 | 29.2457965  | -0.273365021 | 4.84632513 | 0.030411784 | SUT2      |
| YBR178W   | 0.39456943 | 0.34534431 | 0.48420577 | 0.23651457 | 0.58640978 | 0.19368077  | -0.273788977 | -1.012437  | 0.650157565 | YBR178W   |
| YJL032W   | 0.52609257 | 1.09359032 | 0.48420577 | 0.7095437  | 0.32578321 | 0.71016283  | -0.274007278 | -0.3704151 | 0.592199358 | YJL032W   |
| YJR127C   | 304.476073 | 265.397103 | 303.294387 | 233.144235 | 243.750999 | 245.070737  | -0.274242719 | 8.05514445 | 0.03297351  | RSF2      |
| YMR112C   | 5.12940253 | 8.00047653 | 4.78153194 | 5.73547828 | 5.0822181  | 4.002373595 | -0.274418111 | 2.48717473 | 0.264831416 | MED11     |
| YIL161W   | 14.5990687 | 13.4108707 | 13.7998643 | 10.9979274 | 11.663039  | 11.8790873  | -0.27520799  | 3.68336534 | 0.048051633 | YIL161W   |
| YPR100W   | 13.8756915 | 13.295756  | 12.7104014 | 11.9439857 | 9.38255649 | 11.5562861  | -0.276235314 | 3.61600316 | 0.068237856 | MRPL51    |
| YOR095C   | 65.8273324 | 84.2064545 | 70.8756191 | 58.1234551 | 64.1792926 | 60.1701598  | -0.27689623  | 6.07422617 | 0.006750744 | RK11      |
| YMR072W   | 103.640236 | 162.024039 | 108.583143 | 108.087158 | 110.505665 | 90.3197999  | -0.277157878 | 6.83334277 | 0.056540977 | ABF2      |
| YLR311C   | 0.32880785 | 0.23022954 | 0.36315432 | 0.35477185 | 0.19546993 | 0.19368077  | -0.277518302 | -1.3124868 | 0.720371241 | YLR311C   |
| YBR189W   | 1258.87375 | 1721.82918 | 1314.55813 | 1265.70771 | 1151.38303 | 1126.38281  | -0.277603555 | 10.3516299 | 0.022058273 | RPS9B     |
| YDL018C   | 18.084432  | 24.5194461 | 18.8234992 | 18.1524931 | 15.8982207 | 16.6565464  | -0.277626873 | 4.23615304 | 0.062524742 | ERP3      |
| YIL045W   | 14.2044993 | 17.3247729 | 14.2840701 | 12.8309153 | 12.5100753 | 12.4601297  | -0.278610105 | 3.81545311 | 0.055039649 | PIG2      |
| YOR316C-A | 0.460331   | 0          | 0.18157716 | 0.11825728 | 0.13031328 | 0.25824103  | -0.278717779 | -1.6898141 | 0.826566463 | YOR316C-A |
| YBR264C   | 17.8871473 | 17.9579042 | 20.2155907 | 15.6690901 | 13.6828949 | 16.8502271  | -0.278737301 | 4.10252422 | 0.041296329 | YPT10     |
| YOR108W   | 384.047574 | 335.67467  | 377.983126 | 295.702339 | 296.267252 | 312.665326  | -0.278993856 | 8.38303013 | 0.002680639 | LEU9      |
| YOR367W   | 28.2774755 | 36.5489396 | 26.7523686 | 25.0705442 | 26.2581268 | 24.2100965  | -0.279075828 | 4.80744137 | 0.033018067 | SCP1      |
| YPL252C   | 71.8116354 | 58.4207459 | 66.75987   | 54.0435788 | 54.0148564 | 54.1660558  | -0.279176893 | 5.90654463 | 0.003304776 | YAH1      |
| YIL008W   | 6.97072651 | 12.4899526 | 7.92886942 | 7.80498075 | 8.99161663 | 5.81042315  | -0.27946804  | 3.08586511 | 0.250845535 | URM1      |
| YPL237W   | 254.694564 | 365.316723 | 271.155229 | 275.362086 | 237.756588 | 221.118881  | -0.279515999 | 8.0825722  | 0.034276505 | SUI3      |
| YIL121W   | 231.875299 | 185.507452 | 214.805783 | 174.192979 | 171.948379 | 174.570936  | -0.279556893 | 7.58694987 | 0.004481057 | QDR2      |
| YMR267W   | 36.5634334 | 45.7581212 | 39.88645   | 33.9398405 | 32.9041043 | 33.8941351  | -0.279871782 | 5.22142638 | 0.009130858 | PPA2      |
| YOR101W   | 76.2176606 | 98.8835877 | 86.7938836 | 67.4657805 | 74.7346687 | 73.6632535  | -0.279960795 | 6.31787666 | 0.005922062 | RAS1      |
| YBR164C   | 26.1731052 | 39.2541367 | 30.2023347 | 27.080918  | 26.4535968 | 25.3076208  | -0.279983049 | 4.86999795 | 0.045853934 | ARL1      |
| YIL027C   | 23.6741655 | 35.8582509 | 24.5734426 | 24.4201292 | 24.3034276 | 20.5947221  | -0.280165133 | 4.68569539 | 0.076978468 | EMC5      |
| YLL055W   | 37.8129032 | 31.080988  | 35.3470209 | 26.3713743 | 28.603766  | 30.7952427  | -0.280870779 | 4.9900412  | 0.013589077 | YCT1      |
| YCR045W-A | 3.28807854 | 1.61160678 | 2.36050311 | 1.24170148 | 1.2379762  | 3.48625389  | -0.280899136 | 1.20689    | 0.4930698   | YCR045W-A |
| YGR206W   | 5.26092567 | 8.00047653 | 3.93417185 | 4.13900494 | 4.03971182 | 6.00410393  | -0.281136046 | 2.42451395 | 0.317621168 | MVB12     |
| YML001W   | 74.6393829 | 108.898573 | 76.6255625 | 80.2966959 | 72.845126  | 60.9448829  | -0.281471421 | 6.30775459 | 0.043041024 | YPT7      |
| YCR085W   | 1.38099299 | 1.32381986 | 1.21051442 | 0.7095437  | 1.10766292 | 1.42032566  | -0.281482732 | 0.3917172  | 0.442341809 | YCR085W   |
| YDR373W   | 53.792965  | 68.5508457 | 53.4442115 | 56.2313386 | 49.0629516 | 39.3171967  | -0.281525801 | 5.74325949 | 0.034011429 | FRQ1      |
| YDL160C-A | 1.84132398 | 2.47496756 | 1.69472018 | 1.77385926 | 1.43344613 | 1.74312695  | -0.281713345 | 0.97049489 | 0.344312702 | MHF2      |
| YMR057C   | 0.59185414 | 0.23022954 | 0.72630865 | 0.41390049 | 0.26062657 | 0.58104232  | -0.281983927 | -0.7643213 | 0.599198194 | YMR057C   |
| YGL213C   | 100.812488 | 92.8400622 | 91.7569927 | 80.8288536 | 76.5590547 | 77.2140677  | -0.282162599 | 6.43957666 | 0.000705157 | SKI8      |
| YNL255C   | 145.004264 | 232.762066 | 145.443307 | 155.4492   | 148.557144 | 126.279863  | -0.282292218 | 7.31378081 | 0.070528875 | GIS2      |
| YGL068W   | 43.3368752 | 50.8807285 | 40.0075014 | 41.5674353 | 34.7284903 | 34.0232556  | -0.282586282 | 5.35448561 | 0.016432223 | MNP1      |
| YER050C   | 11.7713212 | 16.6916417 | 13.43671   | 11.5300852 | 11.7933522 | 11.1689245  | -0.283125488 | 3.6873281  | 0.083346411 | RSM18     |
| YNL302C   | 511.690783 | 738.864153 | 551.570894 | 493.369389 | 501.640989 | 485.815936  | -0.283399721 | 9.09625596 | 0.022569703 | RPS19B    |
| YLR374C   | 2.49893969 | 2.7051971  | 3.02628604 | 2.71991753 | 1.75922934 | 2.259609    | -0.283524245 | 1.39471089 | 0.269539481 | YLR374C   |
| YER001W   | 201.098884 | 185.852797 | 193.319152 | 163.135923 | 155.919845 | 157.591588  | -0.283551416 | 7.46174523 | 0.000959199 | MNN1      |
| YLR218C   | 5.39244881 | 8.05803392 | 6.35520068 | 5.9128642  | 5.73378452 | 6.48433852  | -0.283868239 | 2.62412461 | 0.173786556 | COA4      |
| YPR130C   | 13.0865526 | 13.756215  | 8.53412663 | 14.9004178 | 8.73099006 | 5.35850135  | -0.284723714 | 3.44491245 | 0.349381208 | YPR130C   |
| YNL065W   | 229.244836 | 197.767175 | 259.050085 | 170.586132 | 193.450071 | 198.781032  | -0.285711535 | 7.70225439 | 0.009418157 | AQR1      |
| YPL025C   | 1.24946985 | 1.43893463 | 1.1499887  | 0.82780099 | 1.43344613 | 0.9038436   | -0.286608404 | 0.36813153 | 0.436036292 | YPL025C   |
| YLL007C   | 22.0958878 | 26.4188398 | 23.0602996 | 16.4377625 | 20.4591857 | 21.8859272  | -0.286650885 | 4.45004618 | 0.037995976 | YLL007C   |
| YDR265W   | 167.757767 | 143.145217 | 157.00372  | 132.80293  | 126.599356 | 124.020254  | -0.286777269 | 7.14986769 | 0.001258639 | TSG10     |
| YGR117C   | 52.0174026 | 67.4572554 | 56.3494461 | 51.0280181 | 46.7173125 | 46.418825   | -0.28700343  | 5.74123003 | 0.007430841 | YGR117C   |
| YHR141C   | 684.643714 | 890.355191 | 657.611956 | 694.820672 | 606.282556 | 528.683947  | -0.287056702 | 9.4035185  | 0.027844379 | RPL42B    |
| YNL264C   | 54.9109117 | 60.0899101 | 55.4415602 | 50.6141176 | 45.2187097 | 43.7718544  | -0.287579257 | 5.69551116 | 0.002348759 | PDR17     |
| YMR065W   | 17.4268163 | 19.9724126 | 19.3077049 | 15.4325756 | 14.9208711 | 16.1400643  | -0.287647719 | 4.11605896 | 0.02582587  | KAR5      |
| YLR008C   | 34.1302553 | 40.1174974 | 32.0181063 | 27.7904617 | 28.603766  | 30.7306825  | -0.28771042  | 5.01666003 | 0.012206695 | PAM18     |
| YBL001C   | 27.7513829 | 37.5849725 | 30.8075919 | 26.7261462 | 25.9975003 | 26.0823439  | -0.288337353 | 4.87352873 | 0.020389678 | ECM15     |
| YGR292W   | 7.16801122 | 7.3673453  | 7.8683437  | 6.14937877 | 5.21253138 | 6.97250778  | -0.288944356 | 2.79104534 | 0.110307777 | MAL12     |
| YMR193W   | 14.1387377 | 15.7707235 | 16.8261504 | 10.8205415 | 14.0086781 | 13.4930938  | -0.289144845 | 3.83833007 | 0.060281464 | MRPL24    |
| YDR337W   | 27.882906  | 35.8006936 | 33.2286207 | 29.3869351 | 24.3034276 | 25.6304221  | -0.28926753  | 4.88426258 | 0.019990665 | MRPS28    |
| YGR011W   | 3.48536326 | 3.97145957 | 2.9052346  | 2.83817482 | 3.06236219 | 2.58241029  | -0.289723018 | 1.70949695 | 0.223778714 | YGR011W   |
| YJL200C   | 141.387377 | 150.10966  | 148.590645 | 116.24691  | 119.366969 | 124.343055  | -0.290260116 | 7.06045088 | 0.000432842 | ACO2      |
| YJL215C   | 1.5782777  | 1.38137724 | 1.1499887  | 0.59128642 | 1.43344613 | 1.3557654   | -0.290271677 | 0.4481292  | 0.431941073 | YJL215C   |

|           |            |            |            |            |            |            |              |            |             |           |
|-----------|------------|------------|------------|------------|------------|------------|--------------|------------|-------------|-----------|
| YKL016C   | 87.4628893 | 112.92759  | 78.6229113 | 84.731344  | 74.6043554 | 68.756674  | -0.290775482 | 6.40399064 | 0.019878495 | ATP7      |
| YDL067C   | 2.10437027 | 1.95695109 | 1.27104014 | 1.18257284 | 1.6940727  | 1.48488592 | -0.291213636 | 0.7953047  | 0.349529849 | COX9      |
| YHR143W   | 561.209246 | 411.420189 | 520.460673 | 373.101731 | 401.886169 | 444.949293 | -0.291428397 | 8.82104112 | 0.014588195 | DSE2      |
| YGL082W   | 52.7407798 | 70.9106985 | 52.4757999 | 48.8402583 | 45.9354328 | 49.194916  | -0.291643847 | 5.74168653 | 0.013152346 | YGL082W   |
| YCR101C   | 6.37887237 | 4.71970558 | 5.32626343 | 3.48858988 | 5.34284467 | 4.58377827 | -0.292157277 | 2.34495159 | 0.190366326 | YCR101C   |
| YLR049C   | 49.4527013 | 67.6299275 | 49.9337197 | 44.8786393 | 46.9127824 | 44.675698  | -0.292527967 | 5.66496173 | 0.014616698 | YLR049C   |
| YGR165W   | 40.6406508 | 48.9813348 | 46.3627021 | 36.009343  | 34.9891169 | 40.0919198 | -0.29289886  | 5.36895604 | 0.005600518 | MRPS5     |
| YEL072W   | 5.72125667 | 7.65513222 | 4.84205766 | 4.90767729 | 4.6261216  | 5.35850135 | -0.293274015 | 2.50008623 | 0.173660285 | RMD6      |
| YDR115W   | 14.401784  | 16.4038548 | 12.8314528 | 10.8205415 | 11.1417858 | 13.6867745 | -0.293314945 | 3.73834523 | 0.068251262 | YDR115W   |
| YGR076C   | 8.15443479 | 13.5259855 | 9.0183324  | 8.92842494 | 8.99161663 | 7.16618856 | -0.293507277 | 3.24123858 | 0.169304702 | MRPL25    |
| YJL124C   | 38.8650884 | 54.9097454 | 41.2180159 | 44.8786393 | 35.0542735 | 30.1496401 | -0.294162013 | 5.35843746 | 0.055538697 | LSM1      |
| YPL197C   | 74.2448135 | 102.106801 | 69.6651046 | 51.5601758 | 60.4002074 | 88.7703537 | -0.294171445 | 6.22104399 | 0.095257749 | YPL197C   |
| YPR010C-A | 2.0386087  | 3.62611526 | 1.99734879 | 2.18775975 | 2.15016919 | 1.93680772 | -0.294194809 | 1.30014575 | 0.317750464 | YPR010C-A |
| YBR111C   | 108.966923 | 122.59723  | 102.893725 | 92.5363247 | 90.5025761 | 89.3513961 | -0.29634803  | 6.66229258 | 0.00085824  | YSA1      |
| YJL015C   | 2.0386087  | 2.99298403 | 3.93417185 | 1.89211654 | 2.99720554 | 2.45328978 | -0.296661154 | 1.5098035  | 0.308723442 | YJL015C   |
| YLR292C   | 34.5248247 | 49.2691217 | 34.8022895 | 35.5954425 | 31.6661281 | 29.3103568 | -0.296925117 | 5.17112271 | 0.03454324  | SEC72     |
| YHR069C-A | 3.41960169 | 4.14413173 | 4.78153194 | 1.00518691 | 2.54110905 | 6.52058598 | -0.297719657 | 1.94375039 | 0.53851855  | YHR069C-A |
| YOL156W   | 12.2974138 | 11.1661327 | 12.4682985 | 9.93361186 | 10.555376  | 8.71563473 | -0.297822199 | 3.45711956 | 0.053562248 | HXT11     |
| YER147C-A | 28.4747602 | 32.8652669 | 25.6629056 | 22.7053985 | 23.5867045 | 24.5328978 | -0.297909466 | 4.72480385 | 0.014318599 | YER147C-A |
| YLR432W   | 804.19825  | 697.76818  | 774.063443 | 610.798872 | 596.248433 | 643.601205 | -0.298435214 | 9.42605687 | 0.001687298 | IMD3      |
| YGL103W   | 1192.06    | 1750.66543 | 1259.29815 | 1126.63714 | 1149.55864 | 1139.81134 | -0.298816599 | 10.3104313 | 0.021627404 | RPL24     |
| YPR145W   | 720.023439 | 694.084507 | 683.880119 | 571.773968 | 568.296234 | 564.062968 | -0.299937556 | 9.30792485 | 0.000675431 | ASN1      |
| YEL041W   | 9.9299972  | 11.0510179 | 11.3788355 | 9.16493951 | 8.20973693 | 8.9093155  | -0.300207706 | 3.30935156 | 0.052197732 | YEF1      |
| YOR357C   | 21.5697952 | 27.1095284 | 20.8813737 | 18.9211654 | 18.6999563 | 18.9161554 | -0.300388367 | 4.4034976  | 0.023499576 | SNX3      |
| YDL085C-A | 1.70980084 | 2.59008233 | 1.99734879 | 2.18775975 | 1.62891606 | 1.29120515 | -0.300467337 | 1.02875406 | 0.324250769 | YDL085C-A |
| YLR199C   | 36.3661487 | 25.1525773 | 38.796987  | 18.5072649 | 28.0173562 | 34.9270992 | -0.300916987 | 4.92498836 | 0.136076395 | YLR199C   |
| YHR010W   | 675.437094 | 904.802094 | 625.59385  | 692.514655 | 566.406691 | 531.589158 | -0.300949182 | 9.37988581 | 0.030546212 | RPL27A    |
| YKR045C   | 16.1115849 | 13.6411003 | 14.6472244 | 11.1161847 | 12.5100753 | 12.3955694 | -0.301048136 | 3.75693966 | 0.03668808  | YKR045C   |
| YOR184W   | 333.608449 | 393.692514 | 341.607168 | 283.344453 | 292.488167 | 291.683242 | -0.301333116 | 8.33487402 | 0.001509332 | SER1      |
| YCL042W   | 6.64191866 | 5.12260728 | 4.17627473 | 2.9564321  | 4.36549503 | 5.61674238 | -0.301725213 | 2.29773544 | 0.248135293 | YCL042W   |
| YBR242W   | 28.7378065 | 31.5990044 | 27.1155229 | 24.1836146 | 23.7821744 | 22.9834516 | -0.301977082 | 4.73011235 | 0.006877549 | YBR242W   |
| YMR306C-A | 0.72337728 | 1.09359032 | 0.42368005 | 0.53215778 | 0.39093985 | 0.9038436  | -0.302202692 | -0.3129327 | 0.53398883  | YMR306C-A |
| YGL229C   | 60.4348836 | 46.7365967 | 48.783731  | 45.588183  | 40.7880581 | 39.898239  | -0.302735754 | 5.55938011 | 0.006832489 | SAP4      |
| YPR012W   | 0.85490042 | 0.97847555 | 0.72630865 | 0.65041506 | 0.65156642 | 0.77472309 | -0.303106936 | -0.1550541 | 0.474112419 | YPR012W   |
| YLR458W   | 1.31523142 | 0.92091816 | 1.02893725 | 1.1234442  | 0.32578321 | 1.16208463 | -0.303232011 | 0.14352729 | 0.421780225 | YLR458W   |
| YMR246W   | 557.921167 | 538.161551 | 597.207287 | 470.545733 | 447.039723 | 454.439651 | -0.303475935 | 8.99724134 | 0.000801796 | FAA4      |
| YOL037C   | 5.32668724 | 6.04352544 | 4.23680046 | 3.84336173 | 4.43065167 | 4.39009749 | -0.30405677  | 2.27490533 | 0.142478158 | YOL037C   |
| YHR131W-A | 1.90708556 | 1.89939371 | 2.11840023 | 1.06431556 | 1.88954263 | 1.87224746 | -0.304372101 | 0.93450376 | 0.319160994 | YHR131W-A |
| YPL177C   | 93.9732848 | 98.480686  | 90.4254269 | 78.9367371 | 77.7318742 | 72.3074881 | -0.304901302 | 6.41700134 | 0.000275889 | CUP9      |
| YKL122C   | 31.4997924 | 38.9087924 | 34.3786094 | 27.6130758 | 30.3629953 | 26.9216273 | -0.305202285 | 4.98914988 | 0.007376271 | SRP21     |
| YPR151C   | 2.23589341 | 1.95695109 | 2.48155455 | 2.18775975 | 1.62891606 | 1.54944617 | -0.305483357 | 1.09483527 | 0.263904551 | SUE1      |
| YHL022C   | 3.74840954 | 3.97145957 | 4.05522329 | 3.6659758  | 3.12751883 | 2.71153081 | -0.305562759 | 1.88012705 | 0.154092785 | SPO11     |
| YOL149W   | 19.3996634 | 28.7786926 | 21.3050537 | 18.8029082 | 19.0908962 | 18.3996733 | -0.305638811 | 4.40064154 | 0.043107645 | DCP1      |
| YKL066W   | 14.3360224 | 17.4974451 | 13.1340814 | 13.5995877 | 11.663039  | 11.1043642 | -0.305946037 | 3.77671207 | 0.05829653  | YKL066W   |
| YEL005C   | 12.6262216 | 16.1736252 | 12.1051442 | 9.9927405  | 11.663039  | 11.4917258 | -0.306183876 | 3.641545   | 0.063833099 | VAB2      |
| YFL051C   | 0.78913885 | 0.57557385 | 0.36315432 | 0.47302914 | 0.4560965  | 0.4519218  | -0.306214725 | -0.6432075 | 0.527196804 | YFL051C   |
| YLR062C   | 424.227894 | 497.698709 | 415.085393 | 368.134925 | 355.624953 | 357.470144 | -0.306403795 | 8.65532005 | 0.00164565  | BUD28     |
| YBR158W   | 451.190138 | 422.816551 | 454.063957 | 349.745917 | 372.76115  | 351.27236  | -0.306618588 | 8.64542429 | 0.000599852 | AMN1      |
| YDR378C   | 23.2138345 | 29.296709  | 20.820848  | 22.1141121 | 18.9605829 | 18.2059925 | -0.306836088 | 4.47627484 | 0.036372615 | LSM6      |
| YHL047C   | 72.337728  | 66.651452  | 82.7386603 | 58.4782269 | 59.4228577 | 61.2676841 | -0.307383593 | 6.06489042 | 0.001351151 | ARN2      |
| YDR158W   | 690.891064 | 556.061898 | 642.420001 | 501.115241 | 517.408896 | 507.895544 | -0.30767287  | 9.15332953 | 0.002116365 | HOM2      |
| YDR016C   | 3.6168864  | 5.98596805 | 3.14733748 | 4.96680593 | 2.54110905 | 2.77609106 | -0.307741854 | 1.99931199 | 0.33015104  | DAD1      |
| YLR333C   | 165.916443 | 229.251065 | 168.382555 | 170.172232 | 157.548761 | 127.571068 | -0.307833276 | 7.40923274 | 0.021766511 | RPS25B    |
| YDR447C   | 283.037801 | 439.56575  | 258.626405 | 295.051924 | 247.399771 | 250.235557 | -0.307902207 | 8.2086698  | 0.056031789 | RPS17B    |
| YIL030W-A | 4.47178682 | 5.75573851 | 6.35520068 | 3.78423309 | 4.43065167 | 5.22938084 | -0.308046159 | 2.36080815 | 0.15715382  | YIL030W-A |
| YMR108W   | 724.560988 | 626.166793 | 752.637338 | 554.27189  | 574.811898 | 569.486029 | -0.308340951 | 9.30783151 | 0.001605754 | ILV2      |
| YMR256C   | 1.18370828 | 1.84183632 | 1.4526173  | 1.53734469 | 0.91219299 | 1.16208463 | -0.308426341 | 0.56993784 | 0.36069379  | COX7      |
| YAR031W   | 21.3725105 | 19.3968388 | 21.8497852 | 17.4429494 | 16.028534  | 17.0439079 | -0.308481663 | 4.24679208 | 0.014066895 | PRM9      |
| YOR128C   | 460.330996 | 502.821317 | 458.603386 | 364.114178 | 379.537441 | 404.276331 | -0.308743369 | 8.74287623 | 0.000844248 | ADE2      |
| YML063W   | 1177.52669 | 1899.62394 | 1286.4742  | 1243.29796 | 1173.34081 | 1106.17545 | -0.308828488 | 10.3603989 | 0.037176328 | RPS1B     |
| YDR022C   | 4.99787939 | 7.25223053 | 5.8104692  | 5.38070642 | 4.75643489 | 4.45465775 | -0.309567827 | 2.4827049  | 0.12728719  | ATG31     |
| YJL046W   | 17.0322469 | 22.6776097 | 18.1577162 | 14.6639032 | 15.9633774 | 16.1400643 | -0.30973347  | 4.13625451 | 0.033230624 | AIM22     |
| YJL179W   | 1.1179467  | 3.1080988  | 1.87629734 | 1.77385926 | 1.56375941 | 1.61400643 | -0.310741157 | 0.99080637 | 0.380519576 | PF1       |
| YGL047W   | 12.100129  | 15.1375923 | 13.6182872 | 11.3526993 | 12.0539788 | 9.55491807 | -0.311119539 | 3.6378696  | 0.052443241 | ALG13     |
| YNL270C   | 8.28595793 | 7.25223053 | 8.83675524 | 7.92323803 | 4.69127824 | 6.97250778 | -0.311222733 | 2.89985738 | 0.132556383 | ALP1      |
| YBL051C   | 139.41453  | 174.629107 | 149.135376 | 110.866204 | 130.899694 | 131.638365 | -0.311477268 | 7.1248852  | 0.002933564 | PIN4      |
| YMR083W   | 643.805779 | 574.825605 | 569.123353 | 522.165038 | 459.158858 | 458.894309 | -0.311722387 | 9.0718047  | 0.001454292 | ADH3      |
| YOR364W   | 0.460331   | 1.09359032 | 0.64736009 | 0.47302914 | 0.97734963 | 0.51648206 | -0.311819933 | -0.2235249 | 0.553194675 | YOR364W   |
| YJL181W   | 29.7899916 | 35.6855788 | 30.8681176 | 23.296685  | 26.3232835 | 28.0837119 | -0.312218246 | 4.86520489 | 0.008593141 | YJL181W   |
| YBR250W   | 4.20874054 | 5.4103942  | 4.96310911 | 3.78423309 | 3.97455518 | 4.00273595 | -0.314291015 | 2.17822724 | 0.126988915 | SPO23     |
| YOL064C   | 69.9045498 | 83.2855363 | 77.7755512 | 61.0207586 | 63.0064731 | 61.7841662 | -0.314706154 | 6.12123752 | 0.000504332 | MET22     |
| YLR262C-A | 5.85277981 | 9.84231286 | 4.84205766 | 7.09543704 | 5.27768802 | 4.13185646 | -0.31512278  | 2.6638836  | 0.273400621 | TMA7      |
| YHR153C   | 5.26092567 | 7.94291915 | 5.68941775 | 5.79460692 | 4.43065167 | 4.97113981 | -0.31527183  | 2.54429509 | 0.145709634 | SPO16     |

|           |            |            |            |            |            |            |              |            |             |           |
|-----------|------------|------------|------------|------------|------------|------------|--------------|------------|-------------|-----------|
| YHR132W-A | 8.41748107 | 13.1806412 | 10.0472697 | 8.04149531 | 9.12192992 | 8.32827319 | -0.315707288 | 3.27391532 | 0.099716432 | IGO2      |
| YNL310C   | 13.941453  | 14.7346906 | 10.2288468 | 10.2292551 | 10.0341229 | 10.9752437 | -0.316615348 | 3.5632903  | 0.06837572  | ZIM17     |
| YPL141C   | 68.5893184 | 77.6449126 | 70.5729904 | 49.1359015 | 64.3747626 | 60.6866418 | -0.316960694 | 6.02893838 | 0.003007066 | FRK1      |
| YPR102C   | 617.303866 | 897.262077 | 666.085557 | 593.178537 | 573.313295 | 583.882967 | -0.317170644 | 9.35610524 | 0.011767855 | RPL11A    |
| YDR512C   | 12.6919832 | 18.6485928 | 12.9525043 | 12.1213716 | 11.3372558 | 12.1373284 | -0.317262611 | 3.7516932  | 0.069490392 | EMI1      |
| YDR218C   | 1.77556241 | 1.38137724 | 1.87629734 | 1.30083012 | 1.49860277 | 1.22664489 | -0.31747009  | 0.70645699 | 0.309313595 | SPR28     |
| YNL078W   | 102.851097 | 101.588785 | 100.714799 | 75.3890186 | 85.1597314 | 84.3802562 | -0.31759113  | 6.52051941 | 0.000180128 | NIS1      |
| YAL060W   | 199.389083 | 156.72876  | 175.827219 | 150.127622 | 137.806298 | 138.739993 | -0.317601037 | 7.32091999 | 0.001507408 | BDH1      |
| YHR018C   | 101.141296 | 101.646342 | 101.077954 | 83.4305139 | 82.5534657 | 77.6659895 | -0.318443032 | 6.5139639  | 8.40168E-05 | ARG4      |
| YNL096C   | 391.281347 | 489.75579  | 397.290831 | 330.765623 | 340.052516 | 354.048451 | -0.318972549 | 8.58502958 | 0.002196784 | RPS7B     |
| YDR471W   | 349.259703 | 545.356224 | 333.980927 | 345.074755 | 333.211069 | 306.532101 | -0.319175465 | 8.52780118 | 0.036795028 | RPL27B    |
| YDL064W   | 49.1238934 | 63.6009106 | 57.438909  | 40.798763  | 43.5897937 | 52.1001276 | -0.319559888 | 5.67963536 | 0.00703542  | UBC9      |
| YMR152W   | 104.758182 | 105.042228 | 100.835851 | 88.4564484 | 80.7290798 | 79.5382369 | -0.320207481 | 6.54484888 | 0.000129544 | YIM1      |
| YGL222C   | 21.8986031 | 26.1310529 | 23.4234539 | 16.7334057 | 19.8076192 | 20.7884028 | -0.320245525 | 4.43287972 | 0.014207696 | EDC1      |
| YOR271C   | 248.447215 | 207.264144 | 229.392482 | 184.363106 | 182.634068 | 181.608004 | -0.320278125 | 7.68466099 | 0.000645916 | FSF1      |
| YDR116C   | 39.8515119 | 52.0318762 | 38.7364613 | 35.2406706 | 35.7709966 | 33.635894  | -0.320832361 | 5.29886185 | 0.007640487 | MRPL1     |
| YOR150W   | 34.32754   | 43.340711  | 31.9575806 | 29.7417069 | 28.3431394 | 29.6977183 | -0.321419033 | 5.04670713 | 0.009335156 | MRPL23    |
| YBR120C   | 4.01145582 | 4.43191866 | 4.11574901 | 3.37033259 | 3.25783211 | 3.42169363 | -0.32231799  | 1.96318392 | 0.115054495 | CBP6      |
| YDR424C   | 16.5061543 | 24.807233  | 16.8866761 | 17.4429494 | 13.6177382 | 15.4944617 | -0.322752849 | 4.13971207 | 0.066347697 | DYN2      |
| YIL009C-A | 8.74628893 | 11.3388049 | 8.17097231 | 7.80498075 | 7.42785722 | 7.35986933 | -0.324171067 | 3.10751017 | 0.068353961 | EST3      |
| YKL138C-A | 0.72337728 | 1.1511477  | 1.02893725 | 0.53215778 | 0.97734963 | 0.83928334 | -0.324180187 | 0.00182743 | 0.46079979  | HSK3      |
| YNL220W   | 583.962749 | 563.371686 | 611.249254 | 469.244903 | 465.479052 | 469.804992 | -0.324306028 | 9.042532   | 0.000256193 | ADE12     |
| YBR240C   | 6.3131108  | 6.2161976  | 6.05257208 | 4.84854864 | 5.01706145 | 4.97113981 | -0.324425672 | 2.51018053 | 0.063570333 | THI2      |
| YCL035C   | 17.9529088 | 26.2461676 | 17.7945619 | 18.1524931 | 14.5950879 | 16.7856669 | -0.324456228 | 4.22902704 | 0.057073758 | GRX1      |
| YGL088W   | 1.84132398 | 1.1511477  | 1.4526173  | 1.06431556 | 1.04250628 | 1.42032566 | -0.324651454 | 0.53268574 | 0.349250949 | YGL088W   |
| YLR363W-A | 4.80059467 | 9.03650947 | 6.23414924 | 5.55809235 | 5.27768802 | 5.22938084 | -0.325086473 | 2.62741166 | 0.170992206 | YLR363W-A |
| YOL160W   | 0.13152314 | 0.28778693 | 0.36315432 | 0.23651457 | 0.06515664 | 0.32280129 | -0.325549735 | -1.4689388 | 0.697497607 | YOL160W   |
| YML052W   | 307.501105 | 240.820099 | 288.223482 | 226.876599 | 215.603329 | 224.863376 | -0.325752698 | 7.97018748 | 0.001535033 | SUR7      |
| YDR528W   | 54.713627  | 62.2770907 | 55.1389316 | 48.0124573 | 45.349023  | 43.9655352 | -0.326062902 | 5.69278638 | 0.000517249 | HLR1      |
| YGL159W   | 31.3025077 | 43.1104815 | 32.078632  | 27.5539472 | 28.9295492 | 28.5356337 | -0.326472862 | 5.00329496 | 0.011886152 | YGL159W   |
| YJR067C   | 6.83920337 | 8.97895208 | 6.23414924 | 6.62240791 | 5.92925445 | 5.03570007 | -0.326509949 | 2.75554936 | 0.108489906 | YAE1      |
| YOR286W   | 50.9652174 | 51.9167614 | 46.6653307 | 40.8578916 | 41.1138413 | 37.2512684 | -0.326652229 | 5.48965159 | 0.000561317 | RDL2      |
| YGR095C   | 26.5019131 | 38.5058907 | 31.1102205 | 23.6514568 | 27.496103  | 25.5658619 | -0.327553675 | 4.85596998 | 0.017662397 | RRP46     |
| YMR236W   | 38.010188  | 47.5424001 | 40.0680272 | 29.3869351 | 34.8588036 | 35.9600633 | -0.328054412 | 5.23948284 | 0.005446928 | TAF9      |
| YMR300C   | 380.496449 | 333.142145 | 385.730419 | 274.889057 | 287.275636 | 313.375489 | -0.328405633 | 8.36313006 | 0.00076555  | ADE4      |
| YLL044W   | 961.105358 | 1088.58283 | 980.577203 | 760.926494 | 822.928392 | 829.082824 | -0.328713858 | 9.82550211 | 0.000577406 | YLL044W   |
| YLR167W   | 2106.34311 | 2759.99173 | 2035.11684 | 2079.02218 | 1775.58366 | 1638.99125 | -0.329149058 | 11.0126351 | 0.001292351 | RPS31     |
| YFL011W   | 0.59185414 | 0.69068862 | 1.33156586 | 0.41390049 | 1.04250628 | 0.64560257 | -0.329188794 | -0.1380238 | 0.519507137 | HXT10     |
| YMR233W   | 6.7734418  | 9.32429639 | 10.1683211 | 8.69191038 | 7.16723065 | 5.03570007 | -0.329376295 | 3.00331616 | 0.146437545 | TRI1      |
| YDR450W   | 775.789252 | 1039.19859 | 735.871713 | 688.434779 | 690.399781 | 651.090195 | -0.329606579 | 9.57672473 | 0.007440003 | RPS18A    |
| YBR191W   | 947.624236 | 1247.90167 | 984.692952 | 868.067593 | 849.577458 | 811.586994 | -0.330468037 | 9.89442203 | 0.003340799 | RPL21A    |
| YPR129W   | 91.5401066 | 94.1063247 | 103.801611 | 69.4761544 | 78.1879707 | 82.5080088 | -0.331244114 | 6.43851732 | 0.000366316 | SCD6      |
| YOR067W   | 20.386087  | 24.5770035 | 18.2787677 | 19.8080951 | 15.3769676 | 15.0425399 | -0.331484418 | 4.25315612 | 0.03475008  | ISA2      |
| YPR284W   | 8.28595793 | 10.3027719 | 7.32361222 | 6.79979383 | 7.49301386 | 6.32690521 | -0.331497054 | 2.98069145 | 0.072989331 | HUA2      |
| YNL114C   | 18.4790014 | 26.7066267 | 20.820848  | 14.4865173 | 18.8302696 | 19.2389567 | -0.331723635 | 4.31502785 | 0.04414766  | YNL114C   |
| YPR039W   | 0.59185414 | 0.17267216 | 0.60525721 | 0.35477185 | 0.19546993 | 0.51648206 | -0.331960764 | -0.9246654 | 0.569368006 | YPR039W   |
| YIL014C-A | 4.66907153 | 4.60459081 | 4.23680046 | 3.96161901 | 2.99720554 | 3.74449492 | -0.331968073 | 2.05906266 | 0.109122143 | YIL014C-A |
| YGR024C   | 45.8358149 | 68.2630588 | 48.3600509 | 45.2925398 | 46.4566859 | 37.380389  | -0.332004878 | 5.60786899 | 0.019133736 | THG1      |
| YMR194W   | 110.93977  | 161.448465 | 109.1884   | 121.154587 | 97.4743368 | 84.4448165 | -0.332302015 | 6.83662177 | 0.02822536  | RPL36A    |
| YOR009W   | 34.1960169 | 32.6925948 | 37.283844  | 23.5923282 | 27.8870429 | 31.3117248 | -0.332511747 | 4.96719137 | 0.00606594  | TIR4      |
| YOL139C   | 216.750138 | 345.401868 | 243.434449 | 214.045684 | 209.674075 | 216.083181 | -0.332636399 | 7.9133487  | 0.016819411 | CDC33     |
| YLR154W-E | 29.3296606 | 17.7276746 | 31.1707462 | 18.6846509 | 21.6320052 | 21.7568067 | -0.332853517 | 4.55338663 | 0.065290634 | YLR154W-E |
| YLR402W   | 0.52609257 | 0.69068862 | 0.60525721 | 0.29564321 | 0.65156642 | 0.51648206 | -0.332863052 | -0.5752814 | 0.624361411 | YLR402W   |
| YBL053W   | 6.44463394 | 4.83482035 | 4.6604805  | 4.55290543 | 4.1700251  | 3.87361544 | -0.33296796  | 2.28564693 | 0.101300263 | YBL053W   |
| YDR308C   | 6.7734418  | 9.78475547 | 5.87099492 | 6.09025013 | 6.18988101 | 5.55218212 | -0.333110921 | 2.77742032 | 0.127298262 | SRB7      |
| YKL106W   | 63.4599159 | 76.0908632 | 70.5729904 | 55.6991808 | 56.4908088 | 54.6825379 | -0.333315846 | 5.97689081 | 0.000292733 | AAT1      |
| YJL022W   | 0          | 0.23022954 | 0          | 0.05912864 | 0.13031328 | 0          | -0.333322556 | -2.3502133 | 1           | YJL022W   |
| YKL063C   | 17.624101  | 20.1450848 | 20.2155907 | 15.2551896 | 15.0511844 | 15.7527028 | -0.333372963 | 4.12780366 | 0.009957151 | YKL063C   |
| YNL228W   | 3.74840954 | 5.46795159 | 4.23680046 | 4.25726222 | 3.12751883 | 3.29257312 | -0.333383638 | 2.05970494 | 0.145634705 | YNL228W   |
| YPL062W   | 0.65761571 | 0.4029017  | 0.3026286  | 0.53215778 | 0.39093985 | 0.12912051 | -0.333476594 | -0.9253163 | 0.567004855 | YPL062W   |
| YIL114C   | 53.792965  | 48.5208757 | 50.1152968 | 37.664945  | 42.3518175 | 40.9312031 | -0.333733553 | 5.51355838 | 0.000392279 | POR2      |
| YDR230W   | 7.8913885  | 8.69116516 | 8.17097231 | 7.09543704 | 6.51566423 | 6.00410393 | -0.33484359  | 2.9132796  | 0.042859436 | YDR230W   |
| YHR049W   | 175.254586 | 182.859813 | 173.224613 | 144.865173 | 140.933817 | 135.44742  | -0.334919854 | 7.31203129 | 6.86498E-05 | FSH1      |
| YDR250C   | 0.06576157 | 0.11511477 | 0.06052572 | 0          | 0.06515664 | 0.12912051 | -0.33564588  | -2.3497205 | 1           | YDR250C   |
| YIL141W   | 3.28807854 | 1.89939371 | 2.36050311 | 1.18257284 | 2.08501255 | 2.71153081 | -0.335752171 | 1.23862703 | 0.306751432 | YIL141W   |
| YGR021W   | 15.3882076 | 14.7346906 | 17.7945619 | 11.4709566 | 11.5327257 | 14.9779797 | -0.335944958 | 3.85220972 | 0.033152478 | YGR021W   |
| YDR204W   | 12.8892679 | 17.6701172 | 12.7104014 | 8.81016766 | 10.4250628 | 15.1071002 | -0.336100342 | 3.70830411 | 0.109270138 | QR15      |
| YCL067C   | 4.86635624 | 6.9644436  | 6.59730357 | 3.96161901 | 5.34284467 | 5.35850135 | -0.336271712 | 2.49826912 | 0.115559294 | HMLALPHA2 |
| YCR039C   | 4.86635624 | 6.9644436  | 6.59730357 | 3.96161901 | 5.34284467 | 5.35850135 | -0.336273456 | 2.49826912 | 0.115514001 | MATALPHA2 |
| YER189W   | 4.60330996 | 2.7051971  | 3.81312041 | 2.30601704 | 3.3881454  | 3.09889235 | -0.336303979 | 1.77625327 | 0.201865967 | YER189W   |
| YLR019W   | 169.467568 | 133.878478 | 154.219537 | 125.293592 | 114.284751 | 122.664489 | -0.336431369 | 7.09543225 | 0.000591283 | PSR2      |
| YMR209C   | 59.9087911 | 62.5648776 | 66.0335614 | 46.415984  | 48.2159153 | 54.6825379 | -0.337016282 | 5.81857794 | 0.000362517 | YMR209C   |
| YDL021W   | 9.99575877 | 8.57605039 | 8.71570379 | 6.97717976 | 7.42785722 | 7.16618856 | -0.337367502 | 3.04675193 | 0.036030556 | GPM2      |



|           |            |            |            |            |            |            |              |            |             |           |
|-----------|------------|------------|------------|------------|------------|------------|--------------|------------|-------------|-----------|
| YIR040C   | 0          | 0          | 0.24210288 | 0.05912864 | 0.06515664 | 0.06456026 | -0.337455514 | -2.3498397 | 1           | YIR040C   |
| YLR013W   | 0.13152314 | 0.05755739 | 0.06052572 | 0          | 0.19546993 | 0          | -0.337497224 | -2.3494394 | 1           | GAT3      |
| YBR122C   | 31.3025077 | 41.9593338 | 32.4417863 | 28.3817482 | 26.7142233 | 28.600194  | -0.337964232 | 4.98749955 | 0.006913814 | MRPL36    |
| YCR018C   | 16.703439  | 16.0009531 | 17.4919333 | 11.5892138 | 15.3118109 | 12.8474912 | -0.33803696  | 3.91757327 | 0.022621079 | SRD1      |
| YDR523C   | 11.9028443 | 10.4754441 | 11.8025156 | 7.27282297 | 11.0114725 | 8.78019499 | -0.338286024 | 3.36732997 | 0.062221336 | SPS1      |
| YDL092W   | 32.7492623 | 42.7075798 | 31.7760034 | 30.1556074 | 28.1476695 | 26.5342657 | -0.338568961 | 5.00765785 | 0.008006935 | SRP14     |
| YJR009C   | 4275.09396 | 2930.24648 | 3560.54658 | 2946.61675 | 2778.53985 | 2788.09927 | -0.33866136  | 11.6498371 | 0.006358446 | TDH2      |
| YBL043W   | 3.81417111 | 4.60459081 | 4.11574901 | 3.48858988 | 3.64877197 | 2.77609106 | -0.339565657 | 1.95475621 | 0.121483771 | ECM13     |
| YNL301C   | 271.26648  | 282.203859 | 262.379    | 221.673279 | 208.696725 | 214.340054 | -0.339606023 | 7.92818475 | 0.000112198 | RPL18B    |
| YJR018W   | 23.9372118 | 26.1886102 | 21.6076823 | 16.1421193 | 20.7198122 | 19.8845592 | -0.340079398 | 4.42891862 | 0.011835095 | YJR018W   |
| YFR010W-A | 0.13152314 | 0          | 0.12105144 | 0.05912864 | 0.06515664 | 0.06456026 | -0.340174428 | -2.3495377 | 1           | YFR010W-A |
| YGR293C   | 3.94569425 | 2.47496756 | 3.2078632  | 1.95124519 | 2.47595241 | 3.16345261 | -0.340666811 | 1.57491746 | 0.200922433 | YGR293C   |
| YKL043W   | 130.931288 | 107.689868 | 128.919785 | 98.271803  | 96.6273005 | 94.9681384 | -0.341952424 | 6.77727922 | 0.000227055 | PHD1      |
| YGL121C   | 6.57615709 | 5.18016466 | 5.02363483 | 4.25726222 | 4.23518175 | 4.71289878 | -0.341960563 | 2.35472441 | 0.086432874 | GP61      |
| YDR315C   | 9.73271249 | 16.5189695 | 12.347247  | 10.7022842 | 9.18708656 | 10.5878822 | -0.342940156 | 3.54566094 | 0.082093982 | IPK1      |
| YGL194C-A | 2.17013184 | 2.64763972 | 2.42102883 | 2.12863111 | 2.41079576 | 1.16208463 | -0.344091478 | 1.19503667 | 0.233519092 | YGL194C-A |
| YMR260C   | 118.89692  | 171.405893 | 118.751464 | 119.380728 | 108.746436 | 94.1288551 | -0.344245842 | 6.93148201 | 0.011179939 | TIF11     |
| YIL004C   | 13.2180757 | 21.066003  | 13.3761843 | 13.2448158 | 12.0539788 | 12.2664489 | -0.344952665 | 3.84483619 | 0.069043292 | BET1      |
| YBL028C   | 7.62834222 | 13.9288872 | 10.834104  | 7.92323803 | 9.44771313 | 8.19915267 | -0.344980111 | 3.2953744  | 0.108929179 | YBL028C   |
| YNL120C   | 4.20874054 | 8.46093562 | 4.53942906 | 5.2033205  | 2.9320489  | 5.42306161 | -0.345424484 | 2.40343289 | 0.270158621 | YNL120C   |
| YJL169W   | 4.99787939 | 4.48947604 | 4.6604805  | 3.78423309 | 3.32298876 | 4.00273595 | -0.345513239 | 2.11617295 | 0.081148453 | YJL169W   |
| YHR210C   | 10.3903282 | 11.3388049 | 10.2288468 | 9.10581087 | 8.14458028 | 7.87635139 | -0.345986635 | 3.27115072 | 0.026334487 | YHR210C   |
| YMR157C   | 30.2503226 | 34.7646606 | 27.0549972 | 23.1784277 | 24.5640541 | 24.7265785 | -0.346435894 | 4.78462491 | 0.004043706 | AIM36     |
| YCR060W   | 12.6262216 | 13.8137724 | 13.4972357 | 10.5840269 | 11.8585089 | 8.97387576 | -0.346855222 | 3.58844901 | 0.027486181 | TAH1      |
| YIL052C   | 244.89609  | 361.115034 | 222.674127 | 222.678466 | 208.436099 | 220.021357 | -0.348004534 | 7.94725998 | 0.01640489  | RPL34B    |
| YER073W   | 261.073436 | 267.00871  | 265.526337 | 211.266638 | 207.589062 | 204.526895 | -0.348291544 | 7.8845073  | 4.92894E-05 | ALD5      |
| YLR441C   | 1045.28017 | 1728.21805 | 1125.47578 | 1088.73569 | 1031.9509  | 941.740473 | -0.348449673 | 10.1804355 | 0.025322259 | RPS1A     |
| YOR312C   | 523.396343 | 804.594687 | 551.570894 | 523.34761  | 499.425663 | 453.535807 | -0.348465094 | 9.12797902 | 0.013809282 | RPL20B    |
| YEL003W   | 10.9821823 | 12.6050673 | 12.5288242 | 10.7614128 | 8.47036349 | 9.10299627 | -0.348967997 | 3.4449259  | 0.028889538 | GIM4      |
| YLR445W   | 0.32880785 | 0.63313124 | 0.78683437 | 0.47302914 | 0.39093985 | 0.51648206 | -0.349208096 | -0.6212705 | 0.528752198 | GMC2      |
| YBR299W   | 9.60118935 | 7.42490268 | 8.04992087 | 5.9128642  | 6.90660408 | 6.84338727 | -0.349249396 | 2.92007959 | 0.048867643 | MAL32     |
| YLR053C   | 2.0386087  | 1.66916417 | 2.17892595 | 1.0518691  | 1.75922934 | 1.87224746 | -0.349481226 | 0.90348397 | 0.267079702 | YLR053C   |
| YGR061C   | 1509.42534 | 1267.41362 | 1469.74608 | 1087.67137 | 1138.87295 | 1106.24001 | -0.349548946 | 10.3030348 | 0.000391324 | ADE6      |
| YPR157W   | 8.48324264 | 7.59757484 | 8.65517807 | 7.92323803 | 5.66862788 | 5.7458629  | -0.350060134 | 2.90362924 | 0.058777528 | TDA6      |
| YOR082C   | 0.32880785 | 1.03603293 | 1.27104014 | 0.41390049 | 0.52125314 | 1.16208463 | -0.35007506  | -0.1229667 | 0.506785277 | YOR082C   |
| YGR017W   | 58.6593212 | 64.2340418 | 55.9862917 | 51.7966904 | 43.3943237 | 44.9984993 | -0.351029236 | 5.73687478 | 0.000420133 | YGR017W   |
| YMR003W   | 13.1523142 | 19.0514945 | 11.6814641 | 11.4118279 | 11.7933522 | 11.2334848 | -0.351524345 | 3.7231921  | 0.060022063 | AIM34     |
| YOR039W   | 55.4370042 | 76.9542239 | 52.5363256 | 49.7863166 | 47.3688789 | 47.7745904 | -0.352260645 | 5.78504011 | 0.005871946 | CKB2      |
| YFL021W   | 66.8795176 | 60.2050249 | 68.2730131 | 44.4647388 | 51.4085907 | 57.2003879 | -0.352326154 | 5.86264868 | 0.000748857 | GAT1      |
| YDR041W   | 27.0937672 | 37.1820708 | 29.1733974 | 25.1888015 | 24.954994  | 23.1125721 | -0.352498313 | 4.80445036 | 0.007172832 | RSM10     |
| YOR066W   | 97.918979  | 98.9987024 | 102.167417 | 67.229266  | 81.3154895 | 85.8005819 | -0.352643062 | 6.47620358 | 0.000289483 | MSA1      |
| YBR209W   | 0.13152314 | 0.23022954 | 0.12105144 | 0.11825728 | 0.26062657 | 0          | -0.353154196 | -1.8974436 | 0.799893365 | YBR209W   |
| YOR221C   | 64.972432  | 81.0983557 | 70.028259  | 56.645239  | 57.728785  | 54.8762187 | -0.353370762 | 6.00852022 | 0.000279475 | MCT1      |
| Q0105     | 0.06576157 | 0          | 0.72630865 | 0.47302914 | 0.13031328 | 0          | -0.353455065 | -1.4692335 | 0.773745525 | COB       |
| YER172C-A | 4.99787939 | 4.60459081 | 4.17627473 | 3.19294667 | 3.90939854 | 3.67993466 | -0.354262362 | 2.07525362 | 0.087747361 | YER172C-A |
| YER061C   | 43.4683983 | 48.5208757 | 44.6074562 | 29.6825783 | 35.2497435 | 42.0287275 | -0.354331698 | 5.34774489 | 0.003760432 | CEM1      |
| YGL035C   | 110.019108 | 109.013687 | 117.238321 | 82.425327  | 85.6809846 | 94.8390179 | -0.355155567 | 6.64386012 | 4.45356E-05 | MIG1      |
| YOR212W   | 91.3428219 | 101.7039   | 93.8148672 | 78.7002225 | 74.2134155 | 71.274524  | -0.355670618 | 6.41489434 | 3.4094E-05  | STE4      |
| YIR023C-A | 2.89350912 | 2.7051971  | 2.78418316 | 2.12863111 | 2.60626569 | 1.8076872  | -0.356415284 | 1.38516385 | 0.150425484 | YIR023C-A |
| YOR276W   | 103.705997 | 165.650154 | 114.635715 | 93.0093539 | 97.99559   | 109.042275 | -0.356472228 | 6.83513548 | 0.012033909 | CAF20     |
| YAR066W   | 4.53754839 | 3.39588572 | 4.41837762 | 3.13381803 | 3.90939854 | 2.58241029 | -0.356472304 | 1.91897215 | 0.124133227 | YAR066W   |
| YBR167C   | 7.03648808 | 8.97895208 | 6.77888073 | 6.26763605 | 6.38535094 | 5.16482058 | -0.356591982 | 2.78892362 | 0.059000733 | POP7      |
| YHL044W   | 8.61476578 | 8.9213947  | 8.71570379 | 6.56327926 | 7.5581705  | 6.39146547 | -0.356970906 | 2.98616533 | 0.029425133 | YHL044W   |
| YNL081C   | 17.3610547 | 26.1886102 | 15.3735331 | 16.2012479 | 14.6602445 | 15.1716605 | -0.357232136 | 4.14210017 | 0.052304997 | SW52      |
| YER058W   | 3.22231697 | 3.51100049 | 3.38944036 | 2.9564321  | 2.41079576 | 2.51785003 | -0.357524277 | 1.64841448 | 0.117293352 | PET117    |
| YKL221W   | 4.47178682 | 3.28077095 | 3.93417185 | 3.06684716 | 2.99720554 | 2.45328978 | -0.358404666 | 1.84088741 | 0.121971066 | MCH2      |
| YOR218C   | 5.1951641  | 5.06504989 | 4.96310911 | 5.26244914 | 3.64877197 | 2.90521158 | -0.358666278 | 2.21624194 | 0.121265047 | YOR218C   |
| YDR408C   | 109.558777 | 107.920097 | 99.2621821 | 80.769725  | 80.5987665 | 85.4132204 | -0.360018271 | 6.5553887  | 1.72484E-05 | ADE8      |
| YDR406W   | 175.188825 | 137.159249 | 161.785252 | 117.725126 | 122.624801 | 128.991394 | -0.360032501 | 7.13637286 | 0.000297991 | PDR15     |
| YLR312W-A | 26.5019131 | 29.4118238 | 27.3576258 | 22.6462699 | 21.2410654 | 20.9820836 | -0.360354558 | 4.63431586 | 0.00125293  | MRPL15    |
| YKL083W   | 12.6919832 | 14.1015594 | 13.6182872 | 8.21888124 | 11.9888222 | 11.298045  | -0.362441973 | 3.59817308 | 0.034982003 | YKL083W   |
| YDR269C   | 0          | 0.28778693 | 0.42368005 | 0.41390049 | 0          | 0.12912051 | -0.362670428 | -1.5546623 | 0.694377239 | YDR269C   |
| YDR461C-A | 3.28807854 | 3.33832834 | 3.57101753 | 1.41908741 | 3.19267547 | 3.35713338 | -0.363099331 | 1.65189654 | 0.221761865 | YDR461C-A |
| YGR294W   | 3.1565554  | 2.7051971  | 2.84470888 | 2.89730346 | 1.43344613 | 2.38872952 | -0.363192455 | 1.43430651 | 0.188942743 | PAU12     |
| YER019C-A | 55.173958  | 68.89619   | 59.2546807 | 43.10478   | 47.4991922 | 52.0355674 | -0.363435028 | 5.76747122 | 0.000762842 | SBH2      |
| YDR237W   | 38.2074727 | 52.7801222 | 39.7048728 | 32.9937822 | 35.3800567 | 33.3130927 | -0.363468078 | 5.28122857 | 0.00359781  | MRPL7     |
| YAL019W-A | 4.60330996 | 2.64763972 | 3.63154325 | 2.9564321  | 2.34563912 | 3.09889235 | -0.364280229 | 1.73492363 | 0.159965937 | YAL019W-A |
| YKL003C   | 13.1523142 | 20.2601996 | 15.7366874 | 11.7074711 | 13.1616417 | 13.3639733 | -0.365414433 | 3.8794611  | 0.034885127 | MRP17     |
| YJL104W   | 16.5719159 | 18.6485928 | 15.5551102 | 13.5995877 | 13.7480515 | 12.0727681 | -0.365459241 | 3.92351614 | 0.009890055 | PAM16     |
| YPL075W   | 145.661879 | 155.232268 | 145.201204 | 109.920145 | 119.301812 | 117.112307 | -0.365551408 | 7.0466711  | 1.19895E-05 | GCR1      |
| YLR128W   | 8.54900421 | 10.8783458 | 9.68411533 | 6.38589334 | 7.5581705  | 8.71563473 | -0.3656457   | 3.13150622 | 0.041783099 | DCN1      |
| YHR147C   | 31.9601234 | 46.1034655 | 37.1022668 | 30.6877652 | 29.4508023 | 29.3103568 | -0.365842092 | 5.0987952  | 0.004742755 | MRPL6     |
| YJR147W   | 106.139175 | 84.7244709 | 108.522617 | 70.5404699 | 79.2956336 | 82.4434485 | -0.366019933 | 6.47121328 | 0.000551336 | HMS2      |

|           |            |            |            |            |            |            |              |            |             |           |
|-----------|------------|------------|------------|------------|------------|------------|--------------|------------|-------------|-----------|
| YLR290C   | 24.3317812 | 38.1605463 | 24.4523912 | 24.4201292 | 20.9804388 | 22.079608  | -0.36650725  | 4.6955072  | 0.027407078 | YLR290C   |
| YGL191W   | 59.8430295 | 86.2209629 | 69.9072075 | 54.9896371 | 55.3179893 | 57.3295084 | -0.366533277 | 6.00225893 | 0.001764098 | COX13     |
| YER044C-A | 5.98430295 | 5.64062374 | 7.14203505 | 4.25726222 | 5.0822181  | 5.22938084 | -0.367076992 | 2.50571681 | 0.057511408 | MEI4      |
| YGL189C   | 972.679395 | 1270.11882 | 933.427666 | 886.279215 | 789.372721 | 786.860416 | -0.36719819  | 9.87645402 | 0.00237621  | RPS26A    |
| YIL066C   | 14.2702609 | 15.6556088 | 15.5551102 | 12.3578862 | 11.0766292 | 11.8145271 | -0.36753402  | 3.76522568 | 0.007858023 | RNR3      |
| YBR057C   | 51.7543563 | 51.0534006 | 51.9310684 | 40.2666052 | 38.8333588 | 40.8020826 | -0.367711071 | 5.52069755 | 2.81629E-05 | MUM2      |
| YLR268W   | 57.6071361 | 67.1694685 | 58.5888977 | 43.932581  | 50.5615544 | 47.7100301 | -0.368027978 | 5.76560222 | 0.000181498 | SEC22     |
| YER084W   | 0.78913885 | 0.74824601 | 0.90788581 | 0.47302914 | 0.52125314 | 0.9038436  | -0.368751616 | -0.2399557 | 0.465547785 | YER084W   |
| YMR230W   | 330.71494  | 383.562415 | 312.252194 | 264.600673 | 265.578474 | 264.697055 | -0.369075264 | 8.24658294 | 0.000165855 | RPS10B    |
| YGR222W   | 21.1752258 | 29.6420533 | 20.5787451 | 20.5176388 | 17.85292   | 16.9147874 | -0.369426504 | 4.41132781 | 0.018483889 | PET54     |
| YEL065W   | 76.6779916 | 88.0627993 | 122.019853 | 62.6763605 | 67.3719681 | 91.9983666 | -0.369430661 | 6.40839988 | 0.022961895 | SIT1      |
| YLR460C   | 10.5218513 | 10.1876572 | 9.44201244 | 7.50933754 | 8.014267   | 7.81179113 | -0.369509096 | 3.1764999  | 0.017221721 | YLR460C   |
| YNL024C   | 9.86423563 | 12.259723  | 11.3788355 | 7.56846618 | 7.68848379 | 10.7170027 | -0.369994707 | 3.32909313 | 0.044976678 | YNL024C   |
| YDR363W-A | 8.08867322 | 10.6481163 | 8.71570379 | 6.38589334 | 7.23238729 | 7.68267061 | -0.37002315  | 3.04690754 | 0.037265596 | SEM1      |
| YKL037W   | 0.85490042 | 0.97847555 | 0.84736009 | 0.76867235 | 0.71672306 | 0.58104232 | -0.371032695 | -0.1226192 | 0.363622775 | AIM26     |
| YNL010W   | 162.496842 | 216.012866 | 176.614053 | 150.423265 | 148.296518 | 130.54084  | -0.371175553 | 7.35958383 | 0.000837488 | YNL010W   |
| YPL037C   | 300.464617 | 424.313043 | 315.641634 | 264.245901 | 261.473605 | 278.64207  | -0.371428555 | 8.26505714 | 0.002272598 | EGD1      |
| YLR237W   | 87.9232202 | 67.3421406 | 87.2175637 | 55.1078944 | 63.9186661 | 68.3047522 | -0.372167991 | 6.16471536 | 0.00125251  | THI7      |
| YGR146C   | 43.0738289 | 38.3907759 | 43.3969418 | 28.6773914 | 33.8162973 | 33.9586953 | -0.372861071 | 5.20958066 | 0.000501425 | ECL1      |
| YLR438W   | 140.795523 | 101.588785 | 127.588219 | 97.6805166 | 96.6924571 | 91.094523  | -0.373411622 | 6.77281947 | 0.000666349 | CAR2      |
| YGL039W   | 64.1832932 | 68.3206162 | 64.3993669 | 48.2489719 | 49.4538915 | 54.3597366 | -0.37349139  | 5.86537061 | 2.69219E-05 | YGL039W   |
| YGR066C   | 2.76198598 | 2.87786926 | 3.08681176 | 1.95124519 | 2.41079576 | 2.38872952 | -0.374015994 | 1.43547909 | 0.128681037 | YGR066C   |
| YBR258C   | 3.74840954 | 4.08657435 | 3.51049181 | 2.48340296 | 3.25783211 | 3.03433209 | -0.374855462 | 1.79858519 | 0.092682249 | SHG1      |
| YML024W   | 809.985268 | 1083.05732 | 836.465461 | 675.485606 | 716.006342 | 713.455403 | -0.374931747 | 9.65446203 | 0.001147421 | RPS17A    |
| YPL186C   | 5.06364096 | 3.79878742 | 5.62889203 | 3.42946124 | 4.36549503 | 3.35713338 | -0.37630428  | 2.13478092 | 0.097715778 | UIP4      |
| YOR344C   | 84.7666648 | 107.517195 | 94.2385473 | 70.5404699 | 79.5562602 | 70.758042  | -0.376440396 | 6.40455655 | 0.000177395 | TYE7      |
| YMR132C   | 8.15443479 | 8.1155913  | 7.98939514 | 5.85373556 | 6.90660408 | 5.93954367 | -0.376476042 | 2.86524495 | 0.023565327 | JLP2      |
| YDL012C   | 18.3474783 | 22.6776097 | 20.3971679 | 11.3526993 | 16.4846305 | 19.561758  | -0.376628914 | 4.19099484 | 0.037964643 | YDL012C   |
| YMR136W   | 83.1226256 | 76.8966665 | 90.1227983 | 52.033205  | 70.4994869 | 70.1124394 | -0.377474408 | 6.20772587 | 0.001094719 | GAT2      |
| YDR355C   | 4.93211781 | 2.99298403 | 4.17627473 | 3.6659758  | 3.25783211 | 2.32416926 | -0.378597309 | 1.87883908 | 0.133231206 | YDR355C   |
| YER055C   | 510.30979  | 562.62344  | 547.09199  | 419.576844 | 403.058989 | 423.450727 | -0.378654481 | 8.90036461 | 2.65155E-05 | HIS1      |
| YJR149W   | 32.7492623 | 30.1025124 | 32.8049407 | 23.7821744 | 25.3721811 | 25.3721811 | -0.379146595 | 4.823959   | 0.000335374 | YJR149W   |
| YBR050C   | 8.22019636 | 6.67665668 | 6.83940645 | 4.02074766 | 6.25503766 | 6.45602573 | -0.379182932 | 2.70454006 | 0.074861835 | REG2      |
| YNL131W   | 100.286396 | 118.625771 | 102.893725 | 89.4025067 | 82.0322126 | 75.9874228 | -0.379234283 | 6.57031447 | 8.09557E-05 | TOM22     |
| YER060W-A | 27.4225751 | 25.7857085 | 26.0260599 | 16.7925343 | 21.8926318 | 22.2732888 | -0.379635739 | 4.55344383 | 0.003672899 | FCY22     |
| YDR045C   | 5.91854138 | 6.44642714 | 5.14468627 | 4.19813358 | 4.75643489 | 4.51921801 | -0.379809004 | 2.40406754 | 0.048820428 | RPC11     |
| YCL025C   | 161.773464 | 121.388525 | 140.661775 | 105.308111 | 109.202532 | 111.108203 | -0.379820313 | 6.96595389 | 0.000228661 | AGP1      |
| YDR056C   | 54.3848191 | 61.7015169 | 59.8599379 | 50.8019598 | 44.2413601 | 40.8020826 | -0.380506888 | 5.70049928 | 0.000171592 | YDR056C   |
| YLR413W   | 863.449425 | 705.423312 | 846.996937 | 570.709653 | 635.798515 | 649.024266 | -0.380691747 | 9.4757582  | 0.000303381 | INA1      |
| YHR072W-A | 3.55112483 | 4.31680389 | 2.84470888 | 2.66078889 | 3.12751883 | 2.45328978 | -0.380761853 | 1.71823523 | 0.119610717 | NOPI0     |
| YNL140C   | 4.53754839 | 4.43191866 | 3.99469757 | 1.30083012 | 3.06236219 | 5.61674238 | -0.380962391 | 1.97511739 | 0.331198482 | YNL140C   |
| YFR055W   | 82.0704404 | 70.0473377 | 69.9072075 | 58.4782269 | 61.8988101 | 49.9696391 | -0.381459659 | 6.03381654 | 0.00022815  | IRC7      |
| YLR307W   | 0.78913885 | 1.03603293 | 1.02893725 | 0.88692963 | 0.52125314 | 0.77472309 | -0.381467363 | -0.0442902 | 0.335727888 | CDA1      |
| YKL109W   | 90.4879215 | 106.020703 | 93.3911872 | 71.5456568 | 79.0350071 | 71.6846868 | -0.382065653 | 6.41881702 | 2.8336E-05  | HAP4      |
| YNL222W   | 10.4560898 | 16.7491991 | 12.1656699 | 9.93361186 | 11.0114725 | 9.29667705 | -0.383308743 | 3.55578841 | 0.046864535 | SSU72     |
| YPL273W   | 180.055181 | 257.396626 | 194.892821 | 156.572644 | 163.999269 | 163.853933 | -0.384781018 | 7.5414469  | 0.001407937 | SAM4      |
| YIL157C   | 60.3691221 | 57.0969261 | 55.8652403 | 42.2178504 | 42.4821308 | 47.9682711 | -0.385662802 | 5.67601078 | 3.4403E-05  | COA1      |
| YDL008W   | 15.5854923 | 21.1811177 | 16.5235218 | 12.1805003 | 12.9010152 | 15.7527028 | -0.386653674 | 3.98490597 | 0.018178983 | APC11     |
| YAL016C-A | 14.9936382 | 13.9288872 | 13.9209158 | 8.8692963  | 9.83865298 | 14.0741361 | -0.387223624 | 3.66915558 | 0.031371131 | YAL016C-A |
| YDR529C   | 48.7950856 | 74.6519285 | 50.5995026 | 46.0612121 | 45.4793363 | 41.5768057 | -0.387562506 | 5.68280114 | 0.005994334 | QCR7      |
| YOL102C   | 20.7806564 | 34.7071032 | 21.8497852 | 17.502078  | 19.0257395 | 22.6606503 | -0.387912182 | 4.51835422 | 0.035423155 | TPT1      |
| YAR064W   | 1.64403927 | 1.5540494  | 1.69472018 | 2.06950247 | 1.10766292 | 0.51648206 | -0.38866932  | 0.64800204 | 0.304884678 | YAR064W   |
| YBL092W   | 962.749397 | 1369.11752 | 945.835439 | 812.545799 | 848.991049 | 841.220152 | -0.389220083 | 9.91225687 | 0.002868789 | RPL32     |
| YOR163W   | 22.7535035 | 28.1455613 | 23.3024025 | 18.6255222 | 20.8501255 | 17.2375887 | -0.389233937 | 4.45721321 | 0.00327657  | DDP1      |
| YLR159C   | 4.34026368 | 5.35283682 | 4.05522329 | 4.43464815 | 3.77908525 | 2.259609   | -0.389542521 | 2.06383118 | 0.12401587  | SM1       |
| YIL098C   | 6.70768023 | 8.518493   | 6.59730357 | 5.08506321 | 5.99441109 | 5.61674238 | -0.390228345 | 2.71282055 | 0.038027924 | FMC1      |
| YIL070C   | 39.8515119 | 59.5143362 | 43.8206219 | 35.8910857 | 37.0089728 | 36.4119851 | -0.390753659 | 5.40087321 | 0.003342894 | MAM33     |
| YIL132C   | 7.29953437 | 9.84231286 | 8.35254947 | 5.49896371 | 6.84144744 | 7.16618856 | -0.391157158 | 2.93308208 | 0.037207423 | CSM2      |
| YHL046W-A | 4.86635624 | 4.43191866 | 5.93152064 | 4.43464815 | 3.71392861 | 3.42169363 | -0.392024012 | 2.20154936 | 0.06065263  | YHL046W-A |
| YNL185C   | 32.5519776 | 32.1745783 | 31.7154777 | 21.9367262 | 25.2807772 | 26.2760247 | -0.393106168 | 4.8302635  | 0.00037914  | MRPL19    |
| YDL245C   | 13.941453  | 13.8137724 | 14.6472244 | 10.1701264 | 11.467569  | 10.6524424 | -0.393831475 | 3.65280232 | 0.005356435 | HXT10     |
| YDR106W   | 2.49893969 | 2.82031187 | 2.36050311 | 1.8329879  | 2.15016919 | 1.87224746 | -0.393928233 | 1.25325327 | 0.120672403 | ARP10     |
| YKL156C-A | 0.72337728 | 0.17267216 | 0.78683437 | 0.41390049 | 0.52125314 | 0.32280129 | -0.394167903 | -0.7142011 | 0.449024739 | YKL156C-A |
| YFR049W   | 10.3245666 | 14.2742315 | 9.80516677 | 7.62759482 | 8.60067678 | 10.0068399 | -0.394233132 | 3.35734047 | 0.041937115 | YMR31     |
| YGL231C   | 35.8400561 | 64.5793861 | 46.5442793 | 31.3973089 | 39.4849252 | 40.9957634 | -0.395096373 | 5.43663526 | 0.02205798  | EMC4      |
| YBL012C   | 14.5333072 | 12.0870509 | 14.2840701 | 6.56327926 | 10.8811593 | 13.6867745 | -0.395502153 | 3.59769178 | 0.083284246 | YBL012C   |
| YDR233W-A | 2.89350912 | 3.91390219 | 2.23945167 | 1.65560198 | 2.73657898 | 2.51785003 | -0.396744219 | 1.47842638 | 0.169214969 | DAD3      |
| YKL156W   | 68.0632258 | 84.4942414 | 68.0914359 | 46.8890131 | 55.9895557 | 64.6893778 | -0.398335098 | 6.01881115 | 0.001162619 | RPS27A    |
| YLR037C   | 2.0386087  | 2.82031187 | 2.11840023 | 1.1234442  | 1.95469927 | 2.259609   | -0.398399645 | 1.12303681 | 0.189777445 | PAU23     |
| YJR086W   | 8.68052735 | 13.007969  | 9.92621821 | 7.98236667 | 6.51566423 | 9.49035782 | -0.400326852 | 3.23588043 | 0.050445504 | STE18     |
| YOR202W   | 25.7785358 | 28.0304466 | 24.6944941 | 18.0933645 | 19.481836  | 21.9504875 | -0.400655326 | 4.5322258  | 0.00108097  | HIS3      |
| YPL274W   | 109.6903   | 95.8330463 | 115.967281 | 77.9906788 | 82.4883091 | 83.0244908 | -0.400684999 | 6.55902637 | 1.2852E-05  | SAM3      |
| YHR059W   | 10.7848976 | 11.9143787 | 9.44201244 | 8.63278173 | 6.90660408 | 8.78019499 | -0.40147007  | 3.25557278 | 0.019766841 | FVY4      |

|           |            |            |            |            |            |             |              |            |             |           |
|-----------|------------|------------|------------|------------|------------|-------------|--------------|------------|-------------|-----------|
| YBL090W   | 11.3767518 | 16.4038548 | 15.3735331 | 10.5248983 | 13.0964851 | 9.10299627  | -0.401523863 | 3.67786492 | 0.032354307 | MRP21     |
| YPR166C   | 11.4425133 | 18.4183632 | 11.5604127 | 11.6483425 | 11.2069425 | 8.52195396  | -0.401714126 | 3.62057674 | 0.056795904 | MRP2      |
| YDL045W-A | 7.56258065 | 10.8783458 | 7.38413794 | 6.91805112 | 6.90660408 | 5.7458629   | -0.40184457  | 2.9479561  | 0.046600588 | MRP10     |
| YGL041W-A | 8.74628893 | 10.3027719 | 10.7735783 | 8.98755359 | 6.84144744 | 6.71426676  | -0.40197054  | 3.15042038 | 0.025886213 | YGL041W-A |
| YGR228W   | 6.83920337 | 5.75573851 | 4.11574901 | 3.25207531 | 3.71392861 | 5.68130264  | -0.401988361 | 2.32328652 | 0.127763635 | YGR228W   |
| YPR187W   | 83.5829566 | 123.345476 | 86.3702036 | 78.5228366 | 65.4172688 | 78.053351   | -0.402204131 | 6.4272683  | 0.002799107 | RPO26     |
| YIL171W-A | 0.78913885 | 0.92091816 | 0.78683437 | 0.53215778 | 0.78187971 | 0.58104232  | -0.403296637 | -0.222863  | 0.402483036 | YIL171W-A |
| YJL220W   | 0.78913885 | 0.92091816 | 0.78683437 | 0.53215778 | 0.78187971 | 0.58104232  | -0.403298542 | -0.222863  | 0.402435576 | YJL220W   |
| YOR333C   | 6.83920337 | 6.27375498 | 4.59995478 | 3.54771852 | 4.82159153 | 5.03570007  | -0.403339887 | 2.4065128  | 0.073680453 | YOR333C   |
| YER056C-A | 371.552875 | 521.469909 | 386.27515  | 299.900472 | 304.476989 | 362.828646  | -0.403616277 | 8.54913327 | 0.001862372 | RPL34A    |
| YDL186W   | 7.69410379 | 6.15864021 | 8.47360091 | 5.43983506 | 5.53831459 | 5.87498341  | -0.403828203 | 2.7336831  | 0.030015122 | YDL186W   |
| YGL101W   | 33.406878  | 54.7370733 | 39.9469757 | 30.9834084 | 35.7709966 | 30.1496401  | -0.404041782 | 5.23535228 | 0.008573052 | YGL101W   |
| YIL156W-A | 4.86635624 | 5.92841067 | 5.20521199 | 2.60166025 | 4.36549503 | 5.16482058  | -0.405721922 | 2.26656579 | 0.101631777 | YIL156W-A |
| YOR277C   | 0.59185414 | 0.92091816 | 0.3026286  | 0.7095437  | 0          | 0.64560257  | -0.405848405 | -0.5991819 | 0.527977237 | YOR277C   |
| YKL085W   | 207.083187 | 208.587964 | 194.045461 | 164.259368 | 154.030302 | 141.645204  | -0.406485032 | 7.47912954 | 9.39783E-06 | MDH1      |
| YBR262C   | 8.22019636 | 9.26673901 | 7.44466366 | 5.97199284 | 6.97176072 | 5.87498341  | -0.407604228 | 2.89234312 | 0.020234108 | MIC12     |
| YLR061W   | 252.721717 | 332.451457 | 268.613149 | 236.632825 | 201.008241 | 205.559859  | -0.408645594 | 7.96389047 | 0.000366675 | RPL22A    |
| YOR234C   | 381.088303 | 522.851287 | 406.853895 | 314.919147 | 324.349765 | 347.592425  | -0.40968636  | 8.58160166 | 0.000467947 | RPL33B    |
| YPL132W   | 26.3046283 | 30.1600698 | 25.0576484 | 17.5612067 | 21.5668486 | 22.2732888  | -0.411035495 | 4.58218578 | 0.001715117 | COX11     |
| YFR032C-A | 16.9664853 | 24.3467739 | 12.1656699 | 12.4761435 | 13.8783648 | 13.8804553  | -0.411929783 | 3.97910421 | 0.05117486  | RPL29     |
| YJR148W   | 409.43154  | 420.284026 | 401.467106 | 324.557116 | 307.018098 | 293.68461   | -0.412044904 | 8.49005916 | 4.01389E-06 | BAT2      |
| YEL018C-A | 3.55112483 | 2.93542664 | 3.81312041 | 2.83817482 | 1.82438598 | 3.03433209  | -0.414036572 | 1.64481025 | 0.095575887 | YEL018C-A |
| YHR084W   | 148.752673 | 146.138201 | 151.132725 | 106.017655 | 119.236655 | 109.300516  | -0.415076759 | 7.0248961  | 8.07622E-07 | STE12     |
| YCR003W   | 5.91854138 | 11.6265918 | 9.50253816 | 6.26763605 | 7.29754393 | 6.77882701  | -0.415149732 | 3.0104047  | 0.074447976 | MRPL32    |
| YKR085C   | 32.5519776 | 35.1100049 | 29.2944489 | 24.4201292 | 22.6745115 | 25.5658619  | -0.416249487 | 4.82836024 | 0.000261491 | MRPL20    |
| YIR030C   | 5.1951641  | 8.1155913  | 6.71835501 | 4.61203408 | 5.40800131 | 5.03570007  | -0.417146646 | 2.58318097 | 0.046362465 | DCG1      |
| YDL162C   | 0.13152314 | 0.17267216 | 0.12105144 | 0.11825728 | 0.19546993 | 0           | -0.417979938 | -2.0128815 | 0.782173791 | YDL162C   |
| YHR175W-A | 0.52609257 | 0.34534431 | 0.24210288 | 0.11825728 | 0.39093985 | 0.32280129  | -0.41824442  | -1.170727  | 0.509892255 | YHR175W-A |
| YDR445C   | 1.18370828 | 0.80580339 | 1.1499887  | 0.53215778 | 0.97734963 | 0.83928334  | -0.418669716 | 0.04715197 | 0.280594714 | YDR445C   |
| YBR146W   | 64.1175316 | 84.5517988 | 63.9151612 | 52.2105909 | 48.7371684 | 58.0396713  | -0.419851275 | 5.95625611 | 0.000342503 | MRPS9     |
| YNL147W   | 12.4289369 | 20.3753143 | 11.2577841 | 13.0674299 | 11.3372558 | 8.52195396  | -0.420594917 | 3.70107669 | 0.06799681  | LSM7      |
| YBR268W   | 18.6105246 | 20.1450848 | 18.2787677 | 14.7821605 | 13.0313285 | 14.78242989 | -0.420761645 | 4.06589792 | 0.001345612 | MRPL37    |
| YCR021C   | 14.401784  | 12.8352969 | 13.6788129 | 10.2883837 | 9.12192992 | 11.1043642  | -0.421459874 | 3.58890532 | 0.005082091 | HSP30     |
| YLR010C   | 2.89350912 | 5.06504989 | 2.9052346  | 2.18775975 | 2.99720554 | 2.96977183  | -0.422057409 | 1.72595334 | 0.129415685 | TEN1      |
| YMR316C-B | 1.70980084 | 1.1511477  | 2.11840023 | 1.41908741 | 0.78187971 | 1.48488592  | -0.422158911 | 0.65006553 | 0.226872591 | YMR316C-B |
| YER102W   | 780.852892 | 1068.4953  | 779.994964 | 591.168163 | 640.294324 | 730.30563   | -0.422629721 | 9.57996509 | 0.001154268 | RPS8B     |
| YOR089C   | 373.459961 | 284.563712 | 364.183262 | 238.17017  | 255.739821 | 268.57067   | -0.422819126 | 8.21702358 | 0.000152    | ALT1      |
| YOR253W   | 31.1709846 | 50.5929415 | 35.1049181 | 26.0166025 | 30.4281519 | 30.7952427  | -0.423630347 | 5.09523994 | 0.00752443  | NAT5      |
| YGL031C   | 507.679327 | 790.6658   | 504.360831 | 463.805068 | 448.668639 | 430.746036  | -0.42453933  | 9.03481299 | 0.003908312 | RPL24A    |
| YKR071C   | 77.7959383 | 103.027719 | 83.9491747 | 67.9979383 | 67.6977513 | 61.6550457  | -0.424561695 | 6.27026237 | 6.80599E-05 | DRE2      |
| YPR035W   | 687.734508 | 640.498582 | 681.45909  | 500.050925 | 499.165036 | 496.9203    | -0.425690614 | 9.19090512 | 1.66872E-06 | GLN1      |
| YOR232W   | 74.0475288 | 99.6318337 | 70.7545676 | 64.5093484 | 62.5503766 | 54.9407789  | -0.425845423 | 6.15462367 | 0.000555106 | MGE1      |
| YLR058C   | 2565.68769 | 2060.61195 | 2478.8309  | 1732.76485 | 1736.2942  | 1819.04981  | -0.426089114 | 11.0123853 | 4.28095E-05 | SHM2      |
| YLR406C   | 156.117969 | 229.538852 | 144.535421 | 154.56227  | 124.644657 | 115.36918   | -0.426220214 | 7.26976297 | 0.005683904 | RPL31B    |
| YOR268C   | 0.19728471 | 0.51801647 | 0.12105144 | 0.23651457 | 0.32578321 | 0.06456026  | -0.426393078 | -1.4285031 | 0.573117318 | YOR268C   |
| YER131W   | 342.02593  | 483.59715  | 330.652013 | 327.690934 | 271.442572 | 261.146241  | -0.426620586 | 8.39350849 | 0.00226826  | RPS26B    |
| YPL092W   | 142.110755 | 117.53218  | 136.667078 | 90.0529218 | 97.9304333 | 106.782666  | -0.426960593 | 6.84917012 | 1.38349E-05 | SSU1      |
| YKR006C   | 47.0195232 | 59.9747953 | 49.1468853 | 35.4771852 | 37.7908525 | 42.9325711  | -0.427695042 | 5.50907666 | 0.000193023 | MRPL13    |
| YBR195C   | 37.4840954 | 45.9883507 | 42.065376  | 31.2790516 | 31.6009715 | 30.4724414  | -0.428487152 | 5.19516733 | 4.69727E-05 | MSI1      |
| YBL031W   | 18.4132398 | 19.4543962 | 18.218242  | 11.0570561 | 15.3769676 | 15.300781   | -0.428889066 | 4.03798982 | 0.005240518 | SHE1      |
| YKR094C   | 353.73149  | 535.456354 | 407.035472 | 302.265618 | 330.735116 | 329.902915  | -0.429034527 | 8.55724825 | 0.001011071 | RPL40B    |
| YER187W   | 0.32880785 | 0.80580339 | 1.21051442 | 0.82780099 | 0.58640978 | 0.32280129  | -0.430081009 | -0.2958042 | 0.374077826 | YER187W   |
| YHR039C-A | 55.5027658 | 59.3416641 | 54.836303  | 44.8195106 | 41.9608776 | 39.1235159  | -0.430114821 | 5.62680003 | 3.79667E-06 | VMA10     |
| YDR139C   | 5.32668724 | 9.95742763 | 5.26573771 | 6.09025013 | 5.01706145 | 4.13185646  | -0.43231665  | 2.61599422 | 0.115441517 | RUB1      |
| YMR151W   | 2.76198598 | 2.82031187 | 3.02628604 | 1.47821605 | 2.47595241 | 2.45328978  | -0.433177489 | 1.39152181 | 0.098865875 | YIM2      |
| YIL130W   | 170.651276 | 178.600566 | 174.435127 | 118.493799 | 134.28784  | 135.124618  | -0.433390845 | 7.24856506 | 6.79826E-07 | ASG1      |
| YPR069C   | 261.862575 | 331.357866 | 277.873584 | 205.05813  | 218.079282 | 222.022725  | -0.433435222 | 7.98222672 | 2.83406E-05 | SPE3      |
| YJR102C   | 9.40390463 | 11.2812475 | 8.65517807 | 7.09543704 | 7.10207401 | 7.5535501   | -0.433435548 | 3.11350832 | 0.010885116 | VP525     |
| YOL127W   | 1009.44011 | 1623.69383 | 1077.17625 | 890.772992 | 896.294771 | 959.688224  | -0.433858988 | 10.0719452 | 0.003451767 | RPL25     |
| YDR224C   | 234.703046 | 384.022874 | 247.550198 | 221.081992 | 212.019714 | 208.20683   | -0.433969924 | 7.97414316 | 0.003928682 | HTB1      |
| YMR158W   | 13.2838373 | 17.3823303 | 12.1051442 | 9.46058272 | 10.555376  | 11.6854066  | -0.434594661 | 3.65014867 | 0.013467627 | MRPS8     |
| YJL117W   | 201.36193  | 192.989912 | 201.369073 | 148.235506 | 142.82336  | 148.875953  | -0.437205602 | 7.43250835 | 2.51591E-07 | PHO86     |
| YER048W-A | 9.40390463 | 11.1085753 | 10.1077954 | 6.56327926 | 7.81879707 | 8.26371293  | -0.438780565 | 3.17181813 | 0.009125467 | ISD11     |
| YGR020C   | 73.2583899 | 97.5597678 | 60.8283494 | 65.4554067 | 57.2075319 | 48.1619519  | -0.439344901 | 6.0715201  | 0.003599667 | VMA7      |
| YJR099W   | 17.4925779 | 24.3467739 | 15.3130074 | 16.3786338 | 13.0313285 | 12.7183707  | -0.439849371 | 4.06297506 | 0.016693993 | YUH1      |
| YJR025C   | 24.4633044 | 30.4478567 | 25.9655342 | 21.7002116 | 19.2863661 | 18.5287938  | -0.44263242  | 4.55811623 | 0.000511941 | BNA1      |
| YML009C   | 2.56470126 | 3.16565618 | 1.69472018 | 1.95124519 | 1.95469927 | 1.54944617  | -0.444051614 | 1.18851282 | 0.12424029  | MRPL39    |
| YGL226W   | 6.44463394 | 8.57605039 | 7.32361222 | 6.0466519  | 4.6261216  | 5.03570007  | -0.444256656 | 2.72521339 | 0.029046567 | MT3       |
| YNL279W   | 29.0008528 | 21.9293637 | 25.6629056 | 16.023862  | 18.2438598 | 21.9504875  | -0.445853311 | 4.4751277  | 0.002534967 | PRM1      |
| YLR283W   | 18.1501936 | 24.058987  | 16.8261504 | 13.2448158 | 15.0511844 | 15.1071002  | -0.445946604 | 4.10602496 | 0.005234425 | YLR283W   |
| YLR264W   | 34.5248247 | 27.8577744 | 32.0181063 | 23.3558136 | 24.6292108 | 21.2403246  | -0.446017613 | 4.77567616 | 0.000204277 | RPS28B    |
| YBR285W   | 1.51251613 | 1.26626247 | 1.27104014 | 1.00518691 | 0.84703635 | 1.09752437  | -0.448736577 | 0.36804535 | 0.200421074 | YBR285W   |
| YOR388C   | 11.2452286 | 9.49696855 | 11.8630413 | 8.45539581 | 8.53552014 | 6.84338727  | -0.449564488 | 3.25322761 | 0.008279265 | FDH1      |

|           |            |            |            |            |            |            |              |            |             |           |
|-----------|------------|------------|------------|------------|------------|------------|--------------|------------|-------------|-----------|
| YML026C   | 650.184651 | 850.75571  | 658.035636 | 510.043666 | 551.68129  | 519.129029 | -0.449733346 | 9.28416824 | 7.30539E-05 | RPS18B    |
| YEL067C   | 5.45821038 | 5.00749251 | 5.02363483 | 3.54771852 | 3.45330204 | 4.32553724 | -0.450561624 | 2.19976634 | 0.022701406 | YEL067C   |
| YDL196W   | 0.32880785 | 0.28778693 | 0          | 0          | 0.19546993 | 0.25824103 | -0.450728252 | -1.739242  | 0.650604497 | YDL196W   |
| YCR064C   | 3.94569425 | 3.56855788 | 3.93417185 | 2.71991753 | 2.67142233 | 2.96977183 | -0.451257395 | 1.7770139  | 0.037333875 | YCR064C   |
| YER103W   | 118.04202  | 100.38008  | 98.1727191 | 87.6286475 | 74.4088855 | 69.3377163 | -0.451345407 | 6.51511139 | 2.02332E-05 | SSA4      |
| YPL283W-A | 16.8349621 | 11.6841492 | 13.3761843 | 10.9387988 | 11.2069425 | 8.39283344 | -0.452836294 | 3.60727587 | 0.012996911 | YPL283W-A |
| YNL339W-A | 16.8349621 | 11.6841492 | 13.3761843 | 10.9387988 | 11.2069425 | 8.39283344 | -0.452837232 | 3.60727587 | 0.013010735 | YNL339W-A |
| YML133W-A | 16.8349621 | 11.6841492 | 13.3761843 | 10.9387988 | 11.2069425 | 8.39283344 | -0.452837683 | 3.60727587 | 0.013017398 | YML133W-A |
| YGR296C-A | 16.8349621 | 11.6841492 | 13.3761843 | 10.9387988 | 11.2069425 | 8.39283344 | -0.452837992 | 3.60727587 | 0.013021948 | YGR296C-A |
| YER190C-A | 16.8349621 | 11.6841492 | 13.3761843 | 10.9387988 | 11.2069425 | 8.39283344 | -0.452838969 | 3.60727587 | 0.013036392 | YER190C-A |
| YGR219W   | 5.39244881 | 7.19467314 | 8.23149803 | 5.61722099 | 4.88674817 | 4.71289878 | -0.452873826 | 2.62171601 | 0.028666966 | YGR219W   |
| YML094W   | 20.846418  | 32.6925948 | 19.7919107 | 18.329879  | 17.5922934 | 17.6895105 | -0.453154937 | 4.41458443 | 0.009681315 | GIM5      |
| YMR244C-A | 6.64191866 | 6.79177145 | 6.59730357 | 6.09025013 | 5.92925445 | 5.28241029 | -0.453291107 | 2.56395784 | 0.096391149 | COA6      |
| YCR090C   | 15.1251613 | 22.7351671 | 15.4945845 | 13.0674299 | 12.379762  | 13.557654  | -0.453717272 | 3.95929536 | 0.009370159 | YCR090C   |
| YJR082C   | 3.6168864  | 6.67665668 | 3.2078632  | 2.18775975 | 3.64877197 | 4.06729621 | -0.453746528 | 2.01412573 | 0.163916415 | EAF6      |
| YBR018C   | 4.07721739 | 4.02901696 | 3.26838892 | 2.89730346 | 3.25783211 | 2.13048849 | -0.45467177  | 1.76770167 | 0.057737276 | GAL7      |
| YLR325C   | 94.2363311 | 146.944004 | 84.4939062 | 69.0031252 | 81.6412728 | 86.8981063 | -0.455830253 | 6.55514338 | 0.005587867 | RPL38     |
| YOL118C   | 2.36741655 | 1.89939371 | 1.63419446 | 1.18257284 | 1.49860277 | 1.61400643 | -0.455953396 | 0.86259666 | 0.120750274 | YOL118C   |
| YGL034C   | 0.32880785 | 0.17267216 | 0.54473149 | 0.41390049 | 0.26062657 | 0.06456026 | -0.456656966 | -1.2404603 | 0.499204511 | YGL034C   |
| YPL251W   | 12.2316522 | 11.2236901 | 11.6209384 | 9.73029136 | 7.49301386 | 13.3639733 | -0.456720627 | 3.35268146 | 0.110586889 | YPL251W   |
| YLR348C   | 94.7624236 | 86.4511925 | 91.0912098 | 74.9751181 | 64.6353891 | 58.6207136 | -0.456940481 | 6.29582347 | 3.44175E-06 | DIC1      |
| YJL119C   | 1.70980084 | 1.72672155 | 1.21051442 | 1.53734469 | 0.39093985 | 1.42032566 | -0.459450313 | 0.55051233 | 0.218577069 | YJL119C   |
| YDR031W   | 3.55112483 | 6.04352544 | 3.38944036 | 3.48858988 | 3.12751883 | 2.84065132 | -0.4597395   | 1.95966052 | 0.084484402 | MIX14     |
| YHR093W   | 2.63046283 | 2.53252495 | 2.29997739 | 1.53734469 | 2.41079576 | 1.48488592 | -0.460173642 | 1.18386095 | 0.103507024 | AHT1      |
| YLR359W   | 1056.13083 | 1144.35593 | 1047.76075 | 800.483556 | 798.755277 | 761.229993 | -0.460597551 | 9.86872231 | 5.27671E-07 | ADE13     |
| YDL034W   | 3.94569425 | 3.05054141 | 3.69206897 | 2.42427432 | 2.54110905 | 2.77609106 | -0.46166757  | 1.67442229 | 0.046253295 | YDL034W   |
| YLR331C   | 0.65761571 | 1.26626247 | 1.57366874 | 0.23651457 | 0.78187971 | 1.54944617 | -0.462378446 | 0.18352088 | 0.341951137 | JIP3      |
| YDR078C   | 3.55112483 | 6.10108283 | 4.6604805  | 3.60684716 | 3.51845868 | 3.29257312 | -0.462680553 | 2.09453376 | 0.050634498 | SHU2      |
| YBR297W   | 19.9915175 | 16.7491991 | 20.2761165 | 14.4273887 | 14.3344613 | 12.5246899 | -0.463743243 | 4.04541974 | 0.000944161 | MAL33     |
| YOR010C   | 14.3360224 | 12.3172804 | 14.3445958 | 9.46058272 | 9.38255649 | 10.8461232 | -0.464645999 | 3.57349013 | 0.002332492 | TIR2      |
| YOR182C   | 277.053498 | 394.210531 | 255.418542 | 243.669134 | 222.57509  | 204.526895 | -0.466315998 | 8.05757692 | 0.000942674 | RPS30B    |
| YJL062W-A | 33.2753549 | 28.2031187 | 28.9312945 | 19.4533232 | 21.6320052 | 24.2746567 | -0.467949248 | 4.70470527 | 0.000155836 | COA3      |
| YJL157C   | 237.333509 | 253.079822 | 242.889718 | 180.164972 | 172.469632 | 177.411587 | -0.468307729 | 7.71909167 | 7.00762E-08 | FAR1      |
| YLR146W-A | 3.68264797 | 4.31680389 | 2.29997739 | 3.01556074 | 1.56375941 | 2.84065132 | -0.468720339 | 1.62833062 | 0.124677513 | YLR146W-A |
| YGR035C   | 10.4560898 | 17.9579042 | 13.6182872 | 7.86410939 | 12.379762  | 10.2005206 | -0.469103305 | 3.61250831 | 0.033304799 | YGR035C   |
| YHR053C   | 4.07721739 | 6.44642714 | 4.59995478 | 3.31120395 | 4.10486846 | 3.55081415 | -0.469798775 | 2.1669639  | 0.043993811 | CUP1-1    |
| YHR055C   | 4.07721739 | 6.44642714 | 4.59995478 | 3.31120395 | 4.10486846 | 3.55081415 | -0.469802941 | 2.1669639  | 0.043932404 | CUP1-2    |
| YCR098C   | 9.00933521 | 7.07955837 | 8.29202375 | 6.44502198 | 6.49127824 | 6.39146547 | -0.471240325 | 2.83014244 | 0.013403004 | GIT1      |
| YDL075W   | 555.94832  | 786.176324 | 552.599831 | 493.428518 | 439.546709 | 431.972681 | -0.47317815  | 9.08603148 | 0.000302419 | RPL31A    |
| YJL096W   | 18.9393324 | 29.4693812 | 21.1234766 | 17.3838208 | 15.3769676 | 17.3021489 | -0.475290724 | 4.32936342 | 0.003946263 | MRPL49    |
| YDR222W   | 34.6563478 | 34.1315294 | 32.9865178 | 26.430503  | 22.4138849 | 24.2746567 | -0.475608666 | 4.87241996 | 9.66651E-06 | YDR222W   |
| YFL004W   | 305.791305 | 312.824388 | 305.775941 | 231.488633 | 225.832922 | 206.528263 | -0.477567662 | 8.04905183 | 1.16204E-07 | VTC2      |
| YGL147C   | 612.174463 | 949.524183 | 710.632488 | 491.181629 | 544.514059 | 593.889807 | -0.479774195 | 9.34539191 | 0.000624615 | RPL9A     |
| YJL217W   | 50.8336943 | 42.0744485 | 44.9100848 | 33.6208274 | 31.2471645 |            | -0.480319155 | 5.30531346 | 3.75416E-06 | REE1      |
| YPR042C   | 60.3033605 | 54.1614994 | 57.438909  | 38.0788455 | 40.2668049 | 44.8693788 | -0.48043401  | 5.62381776 | 6.93834E-07 | PUF2      |
| YMR101C   | 0.52609257 | 1.26626247 | 1.1499887  | 1.06431556 | 0.32578321 | 0.71016283 | -0.480446055 | -0.0305592 | 0.262613764 | SRT1      |
| YHL015W   | 684.775237 | 944.977149 | 609.130854 | 439.739711 | 583.151948 | 580.267592 | -0.481957531 | 9.32304002 | 0.001598923 | RPS20     |
| YGL258W   | 2.76198598 | 2.64763972 | 3.02628604 | 2.18775975 | 2.01985591 | 1.8076872  | -0.483382706 | 1.34375767 | 0.050189164 | VEL1      |
| YNL318C   | 0.460331   | 0.57557385 | 0.72630865 | 0.29564321 | 0.4560965  | 0.51648206 | -0.484310101 | -0.6671076 | 0.362455537 | HXT14     |
| YJL038C   | 8.28595793 | 4.6621482  | 5.14468627 | 4.31639087 | 4.1700251  | 4.39009749 | -0.484417087 | 2.39709074 | 0.04510636  | LOH1      |
| YBR047W   | 2.10437027 | 2.82031187 | 2.11840023 | 1.41908741 | 2.08501255 | 1.54944617 | -0.486752746 | 1.10158201 | 0.079149939 | FMP23     |
| YGL069C   | 49.649986  | 63.0253367 | 51.6284398 | 30.2147361 | 38.7682021 | 48.3556327 | -0.487108696 | 5.5570637  | 0.000951306 | YGL069C   |
| YJL027C   | 0.26304628 | 0.28778693 | 0.42368005 | 0.29564321 | 0.26062657 | 0.12912051 | -0.487189686 | -1.3126695 | 0.473642704 | YJL027C   |
| YGL183C   | 0.460331   | 0.69068862 | 0.78683437 | 0.29564321 | 0.58640978 | 0.51648206 | -0.48723174  | -0.5535619 | 0.327822017 | MND1      |
| YNL315C   | 42.9423058 | 52.7801222 | 46.2416507 | 32.4024958 | 36.1619365 | 32.7966107 | -0.487432947 | 5.34717241 | 5.18812E-06 | ATP11     |
| YLR297W   | 6.05006452 | 3.74123003 | 5.56836631 | 4.19813358 | 3.84424189 | 2.84065132 | -0.489409776 | 2.1679173  | 0.04398655  | YLR297W   |
| YPR020W   | 17.16377   | 28.2606761 | 18.1577162 | 12.9491726 | 14.9208711 | 17.4958297 | -0.489452855 | 4.19527846 | 0.011188138 | ATP20     |
| YER138W-A | 0.39456943 | 0.23022954 | 0.36315432 | 0.41390049 | 0.13031328 | 0.12912051 | -0.49340053  | -1.3126299 | 0.476526186 | YER138W-A |
| YML090W   | 3.74840954 | 3.45344311 | 3.2078632  | 1.95124519 | 2.41079576 | 3.03433209 | -0.495148197 | 1.62684267 | 0.039384612 | YML090W   |
| YLR462W   | 3.1565554  | 2.64763972 | 2.9052346  | 2.06950247 | 2.34563912 | 1.74312695 | -0.495561722 | 1.37954752 | 0.045658162 | YLR462W   |
| YAL059W   | 24.2002581 | 33.0954965 | 30.2628604 | 19.3941946 | 21.0455955 | 21.7568067 | -0.495625209 | 4.65054464 | 0.000202068 | ECM1      |
| YHR121W   | 34.0644937 | 42.9378093 | 39.0996156 | 27.3174326 | 27.3006331 | 27.7609106 | -0.496339915 | 5.05472793 | 9.06182E-06 | LSM12     |
| YDL068W   | 1.05218513 | 1.89939371 | 1.51314302 | 1.71473062 | 0.58640978 | 0.83928334 | -0.497089646 | 0.49670181 | 0.200631095 | YDL068W   |
| YBR134W   | 1.05218513 | 0.46045908 | 0.48420577 | 0.29564321 | 0.39093985 | 0.71016283 | -0.49878983  | -0.5519577 | 0.294792125 | YBR134W   |
| YLR347W-A | 0          | 0.23022954 | 0.12105144 | 0.05912864 | 0.19546993 | 0          | -0.500165598 | -2.1386889 | 0.762119752 | YLR347W-A |
| YGL041C   | 0.06576157 | 0.28778693 | 0          | 0.11825728 | 0.13031328 | 0          | -0.502463983 | -2.1388143 | 0.762410917 | YGL041C   |
| YGR025W   | 0.06576157 | 0.28778693 | 0          | 0.11825728 | 0.06515664 | 0.06456026 | -0.502738045 | -2.1388305 | 0.762128392 | YGR025W   |
| YFR015C   | 79.0454082 | 66.9392389 | 67.5467044 | 60.3112149 | 47.4991922 | 42.6743301 | -0.503274695 | 5.92624588 | 3.4951E-05  | GSY1      |
| YOR293W   | 416.731075 | 591.632362 | 433.908892 | 339.398405 | 336.794684 | 341.071839 | -0.503764839 | 8.67982608 | 4.29624E-05 | RPS10A    |
| YGR059W   | 2.95927069 | 1.43893463 | 2.23945167 | 1.77385926 | 1.49860277 | 1.3557654  | -0.504146845 | 0.99605449 | 0.099417735 | SPR3      |
| YLR466W   | 588.960629 | 436.745438 | 539.102595 | 414.373523 | 353.996037 | 334.422133 | -0.504627141 | 8.79677244 | 3.18288E-05 | YRF1-4    |
| YJL188C   | 38.5362805 | 69.3566491 | 35.7101753 | 29.0321632 | 37.6605392 | 34.6042979 | -0.504634215 | 5.3572992  | 0.012032611 | BUD19     |
| YNL146W   | 0.65761571 | 0.4029017  | 0.66578293 | 0.11825728 | 0.65156642 | 0.4519218  | -0.507538708 | -0.7140199 | 0.376661344 | YNL146W   |

|           |            |            |            |            |            |            |              |             |              |           |
|-----------|------------|------------|------------|------------|------------|------------|--------------|-------------|--------------|-----------|
| YNL226W   | 2.56470126 | 2.24473802 | 2.36050311 | 1.65560198 | 1.30313285 | 2.06592823 | -0.508152894 | 1.10941158  | 0.057873667  | YNL226W   |
| YKL006C-A | 3.68264797 | 7.25223053 | 5.56836631 | 3.72510445 | 4.03971182 | 3.87361544 | -0.509300286 | 2.272625967 | 0.042148148  | SFT1      |
| YLR349W   | 14.5990687 | 12.3172804 | 12.6498756 | 8.92842494 | 10.0992796 | 8.71563473 | -0.510757711 | 3.50331693  | 0.000926586  | YLR349W   |
| YBR009C   | 141.518901 | 226.200524 | 135.396037 | 139.484467 | 121.061041 | 91.9983666 | -0.513113274 | 7.15796805  | 0.004182689  | HHF1      |
| YPL018W   | 20.9779411 | 23.2531836 | 22.5155681 | 16.1421193 | 14.9860277 | 15.6235823 | -0.513779966 | 4.25276013  | 3.24639E-05  | CTF19     |
| YIL009W   | 126.459501 | 124.957083 | 134.488152 | 92.4771961 | 89.2645999 | 88.3829922 | -0.514417338 | 6.77455087  | 3.02574E-10  | FAA3      |
| YJL189W   | 10.4560898 | 10.4754441 | 5.32626343 | 5.43983506 | 5.66862788 | 7.16618856 | -0.522724693 | 2.91573038  | 0.042610086  | RPL39     |
| YOR265W   | 12.1658906 | 19.3968388 | 13.1340814 | 9.93361186 | 10.0992796 | 11.1043642 | -0.524030228 | 3.67817552  | 0.005733314  | RBL2      |
| YKL209C   | 560.288584 | 484.748298 | 522.518548 | 364.646335 | 367.092523 | 356.953662 | -0.525817457 | 8.79062968  | 1.43054E-08  | STE6      |
| YKL170W   | 7.43105751 | 11.1661327 | 7.8683437  | 6.14937877 | 6.3201943  | 5.93954367 | -0.526511916 | 2.93206503  | 0.008148475  | MRPL38    |
| YDR044W   | 159.07724  | 118.856    | 142.961753 | 106.490684 | 94.0861914 | 91.094523  | -0.528307332 | 6.89341814  | 1.3332E-06   | HEM13     |
| YDR446W   | 0.39456943 | 0.63313124 | 0.24210288 | 0.23651457 | 0.19546993 | 0.4519218  | -0.528732448 | -1.0435652  | 0.357469521  | ECM11     |
| YJL205C   | 0.39456943 | 0.28778693 | 0.24210288 | 0.23651457 | 0.13031328 | 0.25824103 | -0.530788129 | -1.3882363  | 0.453630689  | NCE101    |
| YAL044C   | 306.185874 | 320.997537 | 312.131142 | 201.377636 | 207.654219 | 221.118881 | -0.530815179 | 8.05017725  | 1.77059E-09  | GCV3      |
| YPR194C   | 58.6593212 | 50.0749251 | 49.4495139 | 33.4076827 | 39.159142  | 36.8639069 | -0.53142185  | 5.48284068  | 4.3022E-07   | OPT2      |
| YIL169C   | 218.131131 | 171.46345  | 204.274308 | 156.277001 | 132.52861  | 121.760645 | -0.531968444 | 7.38835274  | 3.36222E-06  | YIL169C   |
| YML129C   | 3.1565554  | 4.2592465  | 4.23680046 | 3.31120395 | 1.95469927 | 2.77609106 | -0.532153556 | 1.77757848  | 0.033180773  | COX14     |
| YLR456W   | 3.6168864  | 5.58306636 | 3.08681176 | 2.42427432 | 3.51845868 | 2.58241029 | -0.53303643  | 1.8507158   | 0.052815779  | YLR456W   |
| YBR092C   | 667.151136 | 488.201741 | 591.396818 | 399.827877 | 400.12694  | 407.052422 | -0.533119358 | 8.94370021  | 1.91133E-06  | PHO3      |
| YJL136W   | 187.223192 | 268.274972 | 169.835173 | 139.602724 | 142.562733 | 147.455628 | -0.541803834 | 7.45942662  | 8.90263E-05  | RPL35B    |
| YHR152W   | 14.5333072 | 18.8212649 | 16.039316  | 10.8796701 | 11.4024124 | 11.6854066 | -0.54243644  | 3.81191044  | 0.000293653  | SPO12     |
| YDR535C   | 1.5782777  | 0.74824601 | 0.84736009 | 0.53215778 | 0.97734963 | 0.64560257 | -0.546041539 | 0.00390971  | 0.189262844  | YDR535C   |
| YDR481C   | 190.313986 | 165.362368 | 200.70329  | 118.789442 | 127.707019 | 134.285335 | -0.547094388 | 7.28835465  | 1.47297E-08  | PHO8      |
| YDL191W   | 387.532937 | 574.134917 | 353.651787 | 279.97412  | 291.575974 | 327.191384 | -0.549561902 | 8.52820126  | 0.00024478   | RPL35A    |
| YLR355C   | 2074.38299 | 1821.3459  | 2164.88398 | 1417.60919 | 1350.30625 | 1355.95908 | -0.555436612 | 10.7292386  | 1.57229E-08  | ILV5      |
| YLR287C-A | 78.913885  | 126.626247 | 70.2098361 | 72.7873583 | 62.6806899 | 52.1646879 | -0.555522538 | 6.27480029  | 0.002035611  | RPS30A    |
| YKL167C   | 12.9550295 | 19.5119536 | 11.1367326 | 7.7458521  | 9.77349634 | 12.2018886 | -0.555602996 | 3.62869417  | 0.014723728  | MRP49     |
| YBR012C   | 4.01145582 | 3.51100049 | 3.2078632  | 3.01556074 | 2.08501255 | 2.13048849 | -0.559054061 | 1.64397586  | 0.019895126  | YBR012C   |
| YBL059C-A | 4.53754839 | 8.05803392 | 4.53942906 | 4.31639087 | 3.58361532 | 3.74449492 | -0.559111482 | 2.30874007  | 0.030029151  | CMC2      |
| YNR034W-A | 1.18370828 | 1.61160678 | 1.93682307 | 0.76867235 | 0.84703635 | 1.61400643 | -0.560419042 | 0.54108978  | 0.0119977123 | YNR034W-A |
| YNR022C   | 12.0343675 | 15.9433957 | 12.347247  | 10.2883837 | 8.20973693 | 8.78019499 | -0.563649284 | 3.51441534  | 0.001114191  | MRPL50    |
| YDL069C   | 6.3131108  | 9.49696855 | 6.35520068 | 6.09025013 | 5.66862788 | 3.22801286 | -0.564016209 | 2.66706121  | 0.029691176  | CBS1      |
| YOL131W   | 0.13152314 | 0.46045908 | 0.24210288 | 0.11825728 | 0.19546993 | 0.25824103 | -0.570725729 | -1.4689892  | 0.436191565  | YOL131W   |
| YOR192C-C | 0.13152314 | 0.51801647 | 0.18157716 | 0.17738593 | 0.26062657 | 0.12912051 | -0.570749751 | -1.4692283  | 0.438745773  | YOR192C-C |
| YJL120W   | 1.44675456 | 1.32381986 | 1.08946297 | 0.7095437  | 0.91219299 | 0.96840386 | -0.574485776 | 0.2604407   | 0.111882585  | YJL120W   |
| YCL048W   | 1.1179467  | 2.07206587 | 1.57366874 | 0.76867235 | 1.30313285 | 1.16208463 | -0.574836436 | 0.55055662  | 0.097638961  | SPS22     |
| YBL044W   | 1.18370828 | 0.63313124 | 0.84736009 | 0.41390049 | 0.71672306 | 0.64560257 | -0.57523661  | -0.2215089  | 0.186609764  | YBL044W   |
| YMR319C   | 124.223607 | 110.913081 | 134.730254 | 83.6078998 | 85.9416111 | 78.5698331 | -0.575675135 | 6.68836994  | 5.32608E-10  | FET4      |
| YDL114W   | 0.85490042 | 0.57557385 | 0.84736009 | 0.29564321 | 0.58640978 | 0.64560257 | -0.57614937  | -0.407132   | 0.219353151  | YDL114W   |
| YKR080W   | 118.568112 | 158.340367 | 126.740859 | 83.253128  | 95.6499508 | 91.9338063 | -0.576397869 | 6.81477542  | 1.54315E-07  | MTD1      |
| YDL246C   | 2.95927069 | 3.28077095 | 3.02628604 | 2.30601704 | 1.17281956 | 2.71153081 | -0.577991351 | 1.4390752   | 0.037437904  | SOR2      |
| YPL281C   | 1.51251613 | 1.38137724 | 1.81577162 | 1.00518691 | 0.97734963 | 1.16208463 | -0.579320891 | 0.52089726  | 0.07409589   | ERR2      |
| YOR393W   | 1.51251613 | 1.38137724 | 1.81577162 | 1.00518691 | 0.97734963 | 1.16208463 | -0.579321022 | 0.52089726  | 0.074156837  | ERR1      |
| YAR019W-A | 0.32880785 | 0.28778693 | 0.24210288 | 0.23651457 | 0.26062657 | 0.06456026 | -0.579324125 | -1.4685628  | 0.433399371  | YAR019W-A |
| YNL259C   | 3.55112483 | 6.9644436  | 5.14468627 | 4.31639087 | 3.12751883 | 3.03433209 | -0.580324687 | 2.17627964  | 0.030159498  | ATX1      |
| YPL189W   | 9.4696662  | 6.33131237 | 6.59730357 | 4.31639087 | 5.27768802 | 5.35850135 | -0.580427121 | 2.66270858  | 0.00600228   | GUP2      |
| YLR437C-A | 6.7734418  | 4.83482035 | 6.17362352 | 3.19294667 | 4.88674817 | 3.80905518 | -0.580496642 | 2.3382217   | 0.0100997    | YLR437C-A |
| YER188W   | 5.58973352 | 5.87085328 | 4.90258338 | 3.6659758  | 3.90939854 | 3.35713338 | -0.58124388  | 2.22711985  | 0.002821888  | YER188W   |
| YHR116W   | 10.8506592 | 9.6696407  | 10.9551555 | 5.9128642  | 7.29754393 | 7.81179113 | -0.583524651 | 3.14916348  | 0.000643267  | COX23     |
| YNL269W   | 0.78913885 | 0.23022954 | 0.06052572 | 0.11825728 | 0.4560965  | 0.12912051 | -0.584050672 | -1.2743841  | 0.427639601  | BSC4      |
| YFR052C-A | 25.9100589 | 29.1240369 | 20.3366422 | 19.15768   | 15.3118109 | 15.7527028 | -0.58445     | 4.39832507  | 0.000134867  | YFR052C-A |
| YMR195W   | 32.5519776 | 34.7071032 | 30.565489  | 21.5228257 | 24.3034276 | 19.3680772 | -0.585838785 | 4.77149469  | 8.80514E-07  | ICY1      |
| YGR205W   | 41.6270744 | 42.3046781 | 39.8259243 | 27.5539472 | 27.3657898 | 27.2444286 | -0.590772483 | 5.10696367  | 1.17519E-09  | TDA10     |
| YNL244C   | 67.0110407 | 99.5742763 | 82.6176089 | 49.0767729 | 52.8420369 | 63.5918534 | -0.591435967 | 6.11457064  | 1.12539E-05  | SUI1      |
| YBR301W   | 1.24946985 | 1.03603293 | 1.51314302 | 1.06431556 | 0.58640978 | 0.83928334 | -0.592371511 | 0.23439335  | 0.09470421   | PAU24     |
| YER067W   | 8.02291165 | 13.007969  | 8.95780668 | 7.68672346 | 6.84144744 | 5.35850135 | -0.593162218 | 3.08407885  | 0.007054696  | RG11      |
| YOR210W   | 4.53754839 | 7.59757484 | 4.84205766 | 4.31639087 | 3.84424189 | 3.09889235 | -0.593531712 | 2.28179371  | 0.017104985  | RPB10     |
| YER145C   | 394.109094 | 401.635434 | 593.63627  | 298.126613 | 269.813656 | 352.369884 | -0.594271041 | 8.58909518  | 6.60673E-05  | FR11      |
| YLR162W-A | 0          | 0.28778693 | 0.18157716 | 0.17738593 | 0.13031328 | 0          | -0.598272272 | -1.954697   | 0.59717969   | RRT15     |
| YGR286C   | 36.3661487 | 40.1750548 | 38.5548841 | 27.080918  | 24.2382709 | 24.6620183 | -0.598743003 | 5.00005942  | 8.75441E-09  | BIO2      |
| YMR225C   | 8.02291165 | 10.5330015 | 7.14203505 | 5.79460692 | 5.53831459 | 5.61674238 | -0.60158736  | 2.85915577  | 0.001822132  | MRPL44    |
| YNL122C   | 4.93211781 | 7.3673453  | 3.57101753 | 3.01556074 | 2.99720554 | 4.45465775 | -0.603434916 | 2.18008193  | 0.035759508  | YNL122C   |
| YKL062W   | 124.223607 | 133.130232 | 126.196128 | 75.8620477 | 84.3126951 | 92.1920474 | -0.604525402 | 6.72966709  | 3.41828E-11  | MSN4      |
| YLR453C   | 16.3088696 | 16.0585105 | 14.5866987 | 10.1109978 | 9.83865298 | 10.9106835 | -0.605013321 | 3.71191484  | 1.77512E-05  | RIF2      |
| YPR002C-A | 3.81417111 | 4.77726297 | 4.11574901 | 2.71991753 | 3.32298876 | 2.32416926 | -0.605716355 | 1.86748534  | 0.007732582  | YPR002C-A |
| YLR112W   | 12.100129  | 9.61208332 | 9.50253816 | 7.27282297 | 7.16723065 | 6.00410393 | -0.606498852 | 3.12664677  | 0.000505701  | YLR112W   |
| YML091C   | 132.904135 | 158.05258  | 130.917134 | 84.7904726 | 96.624571  | 95.2909397 | -0.608749048 | 6.86535071  | 4.50997E-10  | RPM2      |
| YOR375C   | 494.921582 | 508.116596 | 491.589904 | 356.131811 | 323.11789  | 298.913991 | -0.611535223 | 8.68750533  | 1.32353E-10  | GDH1      |
| YNL104C   | 652.683591 | 504.145136 | 608.949277 | 399.236591 | 378.299465 | 377.871186 | -0.611759023 | 8.92774279  | 8.45264E-09  | LEU4      |
| YAR073W   | 1.24946985 | 0.97847555 | 0.96841153 | 0.7095437  | 0.71672306 | 0.64560257 | -0.612774336 | 0.00225663  | 0.104763607  | IMD1      |
| YNR071C   | 6.05006452 | 5.58306636 | 6.05257208 | 3.31120395 | 3.64877197 | 4.58377827 | -0.61651894  | 2.32093022  | 0.001770406  | YNR071C   |
| YLR159C-A | 0.32880785 | 0.28778693 | 0.36315432 | 0.11825728 | 0.19546993 | 0.32280129 | -0.617841531 | -1.3496131  | 0.35940077   | YLR159C-A |
| YLR154C-H | 0.32880785 | 0.28778693 | 0.36315432 | 0.11825728 | 0.19546993 | 0.32280129 | -0.617863838 | -1.3496131  | 0.358880551  | YLR154C-H |

|           |            |            |            |            |            |            |              |            |             |           |
|-----------|------------|------------|------------|------------|------------|------------|--------------|------------|-------------|-----------|
| YLR156C-A | 0.32880785 | 0.28778693 | 0.36315432 | 0.11825728 | 0.19546993 | 0.32280129 | -0.617865994 | -1.3496131 | 0.358830288 | YLR156C-A |
| YLR157C-C | 0.32880785 | 0.28778693 | 0.36315432 | 0.11825728 | 0.19546993 | 0.32280129 | -0.617868865 | -1.3496131 | 0.358763355 | YLR157C-C |
| YOR032C   | 15.1909229 | 13.1806412 | 15.615636  | 8.10062396 | 10.6205327 | 9.87771936 | -0.622084616 | 3.61102258 | 0.000101904 | HMS1      |
| YFL012W   | 0.85490042 | 0.74824601 | 0.54473149 | 0.59128642 | 0.4560965  | 0.32280129 | -0.624732945 | -0.4895755 | 0.156664369 | YFL012W   |
| YBR300C   | 1.05218513 | 0.97847555 | 1.08946297 | 0.59128642 | 0.91219299 | 0.51648206 | -0.625432873 | -0.0279094 | 0.127447524 | YBR300C   |
| YPL017C   | 42.8107826 | 39.4268088 | 41.5811702 | 25.0114156 | 26.5187534 | 28.600194  | -0.627901002 | 5.09264897 | 1.02513E-09 | IRC15     |
| YJL136C   | 385.625852 | 564.407719 | 388.635653 | 297.062297 | 282.714671 | 285.550018 | -0.629574824 | 8.5216757  | 1.94386E-06 | RPS21B    |
| YMR058W   | 669.321268 | 731.43925  | 1068.8237  | 471.55092  | 463.068257 | 660.322311 | -0.630799021 | 9.40423635 | 0.000210259 | FET3      |
| YER066C-A | 3.1565554  | 3.33832834 | 3.14733748 | 2.12863111 | 1.56375941 | 2.51785003 | -0.632229668 | 1.47217029 | 0.009801481 | YER066C-A |
| YHR185C   | 0          | 0.23022954 | 0.06052572 | 0.17738593 | 0          | 0          | -0.633694118 | -2.2766091 | 0.733964493 | PFS1      |
| YGL052W   | 1.77556241 | 1.20870509 | 1.93682307 | 0.76867235 | 1.36828949 | 1.03296412 | -0.634013455 | 0.55302524 | 0.059364137 | YGL052W   |
| YBL026W   | 8.22019636 | 13.8137724 | 9.62358961 | 5.55809235 | 5.92925445 | 8.9093155  | -0.637626698 | 3.14270692 | 0.007723591 | LSM2      |
| YNL146C-A | 0.19728471 | 0.11511477 | 0          | 0.11825728 | 0.06515664 | 0          | -0.637956619 | -2.275783  | 0.733222086 | YNL146C-A |
| YOL077W-A | 5.06364096 | 8.05803392 | 5.08416055 | 2.77904617 | 4.49580832 | 4.45465775 | -0.640506434 | 2.35898868 | 0.014650596 | ATP19     |
| YKL137W   | 2.76198598 | 5.64062374 | 3.51049181 | 2.71991753 | 2.99720554 | 1.93680772 | -0.64200565  | 1.77174704 | 0.027976553 | CMC1      |
| YHR005C-A | 34.1302553 | 59.2265493 | 34.9233409 | 29.5051924 | 27.9521995 | 24.7265785 | -0.643014673 | 5.1404516  | 0.00033308  | TIM10     |
| YKR074W   | 21.7013184 | 42.0744485 | 26.0260599 | 16.5560198 | 20.0030892 | 20.9820836 | -0.644083829 | 4.62881342 | 0.001429479 | AIM29     |
| YJL170C   | 15.3882076 | 13.6411003 | 11.3788355 | 9.57884001 | 8.53552014 | 7.61811036 | -0.647729509 | 3.47985315 | 0.000162455 | ASG7      |
| YBR083W   | 68.1289874 | 72.2345184 | 62.0993895 | 43.8143237 | 43.6549503 | 41.7059262 | -0.648278437 | 5.79239433 | 1.9167E-12  | TEC1      |
| YMR017W   | 2.0386087  | 2.12962325 | 1.57366874 | 0.88692963 | 1.43344613 | 1.3557654  | -0.648768184 | 0.7598333  | 0.03242572  | SPO20     |
| YHL046C   | 0.39456943 | 0.17267216 | 0.24210288 | 0.41390049 | 0.06515664 | 0          | -0.648841016 | -1.5536815 | 0.419863891 | PAU13     |
| YBR292C   | 0.52609257 | 0.4029017  | 0.66578293 | 0.35477185 | 0.4560965  | 0.19368077 | -0.64955074  | -0.8428845 | 0.207324579 | YBR292C   |
| YOR146W   | 5.65549509 | 6.44642714 | 5.62889203 | 3.84336173 | 3.64877197 | 3.80905518 | -0.64995496  | 2.31536857 | 0.000534031 | YOR146W   |
| YDR183C-A | 2.63046283 | 2.35985279 | 2.66313171 | 1.24170148 | 2.28048248 | 1.3557654  | -0.653078007 | 1.14415778 | 0.023975761 | YDR183C-A |
| YBR206W   | 14.7305919 | 15.0800349 | 14.2235444 | 7.80498075 | 8.66583342 | 11.5562861 | -0.653494105 | 3.60181605 | 0.000128896 | YBR206W   |
| YJL079C   | 308.619052 | 249.626379 | 308.075919 | 178.154598 | 183.872044 | 188.064029 | -0.655092653 | 7.88382732 | 1.25971E-10 | PRY1      |
| YPR160W   | 105.021229 | 87.717455  | 94.5411759 | 64.4502198 | 58.0545683 | 59.7827982 | -0.655095545 | 6.29267487 | 1.54734E-12 | GPH1      |
| YMR120C   | 2710.03434 | 2288.42408 | 2576.27731 | 1538.52727 | 1587.08549 | 1663.45959 | -0.661437019 | 11.0089619 | 2.29893E-11 | ADE17     |
| YHR139C-A | 0.65761571 | 0.23022954 | 0.24210288 | 0.35477185 | 0.19546993 | 0.12912051 | -0.663574151 | -1.2397923 | 0.308957467 | YHR139C-A |
| YFL027C   | 38.5362805 | 47.8301871 | 36.9812154 | 27.5539472 | 24.4337408 | 25.8241029 | -0.664828515 | 5.07433255 | 3.50688E-08 | GYP8      |
| YKR095W-A | 4.40602525 | 5.23772205 | 4.84205766 | 2.60166025 | 2.73657898 | 3.80905518 | -0.667270689 | 2.02606988 | 0.002334783 | PC11      |
| YKL138C   | 15.6512539 | 16.28874   | 13.7393386 | 8.75103902 | 9.05677327 | 10.9106835 | -0.670450914 | 3.64791152 | 1.61736E-05 | MRPL31    |
| YMR286W   | 6.11582609 | 6.44642714 | 4.23680046 | 2.89730346 | 4.56096496 | 3.09889235 | -0.672381397 | 2.22823131 | 0.005820884 | MRPL33    |
| YBR201C-A | 0.72337728 | 0.69068862 | 0.90788581 | 0.35477185 | 0.52125314 | 0.58104232 | -0.673479528 | -0.4078753 | 0.133671485 | YBR201C-A |
| YLR202C   | 0.32880785 | 0.4029017  | 0.48420577 | 0.23651457 | 0.26062657 | 0.25824103 | -0.678616092 | -1.138595  | 0.250328784 | YLR202C   |
| YAR015W   | 339.132421 | 357.316247 | 305.533839 | 212.094439 | 208.045159 | 204.204094 | -0.682416153 | 8.08325011 | 2.53065E-13 | ADE1      |
| YCR020W-B | 1.18370828 | 1.20870509 | 0.66578293 | 0.29564321 | 0.78187971 | 0.83928334 | -0.683753987 | -0.0736742 | 0.11675589  | HTL1      |
| YNL013C   | 0.78913885 | 0.4029017  | 0.96841153 | 0.41390049 | 0.13031328 | 0.77472309 | -0.69267069  | -0.5099244 | 0.149224204 | YNL013C   |
| YOR125C   | 30.3160842 | 33.4408408 | 30.0207575 | 18.2116217 | 19.2863661 | 20.4010413 | -0.696907266 | 4.66823584 | 8.88503E-10 | CAT5      |
| YBL062W   | 0.460331   | 1.1511477  | 0.42368005 | 0.29564321 | 0.26062657 | 0.71016283 | -0.700489793 | -0.5545939 | 0.17472818  | YBL062W   |
| YHR052W-A | 0.65761571 | 1.49649201 | 0.78683437 | 0.76867235 | 0.65156642 | 0.38736154 | -0.702615769 | -0.1081973 | 0.092475486 | YHR052W-A |
| YHR054W-A | 0.65761571 | 1.49649201 | 0.78683437 | 0.76867235 | 0.65156642 | 0.38736154 | -0.702620822 | -0.1081973 | 0.092402156 | YHR054W-A |
| YHR165W-A | 0.98642356 | 1.20870509 | 0.78683437 | 0.47302914 | 0.58640978 | 0.77472309 | -0.705563766 | -0.1063292 | 0.094753973 | YHR165W-A |
| YBL016W   | 70.1675961 | 64.7520583 | 64.5204184 | 34.353741  | 43.720107  | 43.9655352 | -0.709419098 | 5.74699117 | 2.48595E-11 | FUS3      |
| YJL218W   | 3.55112483 | 4.48947604 | 3.08681176 | 2.2468884  | 2.54110905 | 2.00136798 | -0.71437114  | 1.6429502  | 0.003662301 | YJL218W   |
| YJR005C-A | 0.13152314 | 0.11511477 | 0.18157716 | 0.23651457 | 0          | 0          | -0.720412692 | -2.0746378 | 0.563275053 | LSO1      |
| YER011W   | 158.156578 | 109.704376 | 131.098711 | 89.6390213 | 76.9499945 | 75.0190189 | -0.722650021 | 6.73987311 | 3.52163E-09 | TIR1      |
| YOR226C   | 46.888     | 60.5503692 | 42.6101074 | 33.2894255 | 29.9068988 | 27.6963504 | -0.723137016 | 5.33380973 | 3.98615E-08 | ISU2      |
| YIL011W   | 46.2303843 | 39.7145957 | 47.1495365 | 23.296685  | 29.4508023 | 27.2444286 | -0.735064788 | 5.15537352 | 2.47718E-10 | TIR3      |
| YER188C-A | 0.52609257 | 0.57557385 | 0.48420577 | 0.17738593 | 0.13031328 | 0.64560257 | -0.735646711 | -0.8698166 | 0.163247427 | YER188C-A |
| YDR136C   | 0.85490042 | 0.63313124 | 0.84736009 | 0.47302914 | 0.58640978 | 0.32280129 | -0.740669485 | -0.4277654 | 0.083859678 | VPS61     |
| YLR434C   | 0.39456943 | 0.23022954 | 0.24210288 | 0.11825728 | 0.26062657 | 0.12912051 | -0.741815122 | -1.5098975 | 0.315088886 | YLR434C   |
| YLR255C   | 0.59185414 | 0.69068862 | 1.02893725 | 0.7095437  | 0.19546993 | 0.4519218  | -0.742208165 | -0.4291253 | 0.114818597 | YLR255C   |
| YBR099C   | 1.05218513 | 2.01450848 | 1.63419446 | 1.24170148 | 0.97734963 | 0.58104232 | -0.744142284 | 0.47597837 | 0.034564346 | YBR099C   |
| YER091C   | 833.199103 | 635.088188 | 737.990114 | 431.579958 | 440.328588 | 444.561932 | -0.744852716 | 9.19781764 | 0.31269E-12 | MET6      |
| YFR053C   | 278.82906  | 265.857562 | 235.989785 | 185.663936 | 146.081192 | 133.639733 | -0.745888399 | 7.69929749 | 6.16853E-10 | HXK1      |
| YDR010C   | 0.32880785 | 0.46045908 | 0.48420577 | 0.29564321 | 0.19546993 | 0.25824103 | -0.748296674 | -1.1064783 | 0.19638084  | YDR010C   |
| YHR092C   | 252.590194 | 190.802732 | 243.313398 | 132.329901 | 129.466248 | 146.358103 | -0.750346626 | 7.51252929 | 2.10523E-11 | HXT4      |
| YGR248W   | 7.82562693 | 9.6696407  | 6.96045789 | 5.49896371 | 4.6261216  | 4.39009749 | -0.750957525 | 2.73251792 | 0.000121678 | SQL4      |
| YGR273C   | 1.1179467  | 1.03603293 | 1.4526173  | 0.88692963 | 0.32578321 | 0.9038436  | -0.752342087 | 0.11552501 | 0.046570432 | YGR273C   |
| YDR343C   | 46.6249537 | 30.9083158 | 41.7627473 | 26.3122457 | 22.9351381 | 21.1112041 | -0.759422649 | 4.98777794 | 2.3894E-07  | HXT6      |
| YEL039C   | 0.52609257 | 0.97847555 | 0.72630865 | 0.41390049 | 0.71672306 | 0.19368077 | -0.759593124 | -0.4695172 | 0.10772078  | CYC7      |
| YKL030W   | 43.9944909 | 42.5349076 | 48.5416281 | 20.4585101 | 28.1476695 | 31.118044  | -0.762113291 | 5.16703564 | 2.30167E-08 | YKL030W   |
| YLR124W   | 0.06576157 | 0.17267216 | 0.3026286  | 0.11825728 | 0.06515664 | 0.12912051 | -0.762632273 | -1.8976627 | 0.444574994 | YLR124W   |
| YGR233C   | 194.193919 | 181.017976 | 193.440204 | 107.673257 | 114.610534 | 112.722209 | -0.763359043 | 7.23601212 | 8.33125E-20 | PHO81     |
| YNL042W-B | 0.19728471 | 0.11511477 | 0.24210288 | 0.05912864 | 0.13031328 | 0.12912051 | -0.764500172 | -1.8970889 | 0.443462004 | YNL042W-B |
| YLR133C   | 399.106974 | 317.601651 | 389.664559 | 239.411872 | 221.011331 | 184.900577 | -0.777476635 | 8.19025715 | 4.62772E-11 | YDR133C   |
| YAL067C   | 3.28807854 | 3.45344311 | 4.23680046 | 1.53734469 | 2.15016919 | 2.71153081 | -0.784315333 | 1.59637329 | 0.002278727 | SEO1      |
| YPL121C   | 0.85490042 | 0.17267216 | 0.54473149 | 0.11825728 | 0.32578321 | 0.4519218  | -0.787721427 | -0.9237673 | 0.165222905 | MEI5      |
| YCL055W   | 34.1302553 | 40.1750548 | 38.3127813 | 20.5176388 | 23.6518611 | 20.8529631 | -0.793997799 | 4.89546511 | 2.4464E-12  | KAR4      |
| YDR019C   | 254.431518 | 286.923565 | 258.444828 | 148.05812  | 147.905578 | 162.820969 | -0.802003785 | 7.71373234 | 9.654E-18   | GCV1      |
| YOR381W   | 30.5791305 | 27.1095284 | 34.9233409 | 17.7977212 | 17.2013536 | 18.076872  | -0.802292484 | 4.61005373 | 1.76484E-10 | FRE3      |
| YJR016C   | 1166.41298 | 1037.47187 | 1143.51244 | 621.028127 | 636.384925 | 659.676709 | -0.804101676 | 9.77734158 | 1.00951E-17 | ILV3      |

|           |            |            |            |            |            |            |              |            |             |            |
|-----------|------------|------------|------------|------------|------------|------------|--------------|------------|-------------|------------|
| YHL045W   | 0.460331   | 0.51801647 | 0.36315432 | 0.29564321 | 0.19546993 | 0.25824103 | -0.815496343 | -1.074608  | 0.152287313 | YHL045W    |
| YLR346C   | 0.72337728 | 0.57557385 | 0.60525721 | 0.41390049 | 0.13031328 | 0.51648206 | -0.816301361 | -0.6910683 | 0.091350103 | YLR346C    |
| YFR023W   | 1.05218513 | 1.20870509 | 1.51314302 | 0.59128642 | 0.71672306 | 0.83928334 | -0.816368544 | 0.1564894  | 0.028783817 | PES4       |
| YCR097W   | 8.87781207 | 15.7707235 | 11.8025156 | 4.43464815 | 7.36270058 | 8.9093155  | -0.8198335   | 3.27554065 | 0.001889349 | HMRA1      |
| YGL015C   | 0.26304628 | 0.28778693 | 0.24210288 | 0.17738593 | 0.06515664 | 0.19368077 | -0.8206485   | -1.5980013 | 0.289120906 | YGL015C    |
| YJL037W   | 0.72337728 | 0.74824601 | 0.66578293 | 0.41390049 | 0.26062657 | 0.51648206 | -0.829119027 | -0.5538029 | 0.065421468 | IRC18      |
| YGR139W   | 0.460331   | 0.28778693 | 0.18157716 | 0.05912864 | 0.32578321 | 0.12912051 | -0.837616303 | -1.4678872 | 0.241675276 | YGR139W    |
| YCL021W-A | 5.06364096 | 3.62611526 | 4.41837762 | 2.36514568 | 2.21532584 | 2.71153081 | -0.839903183 | 1.81629574 | 0.000274832 | YCL021W-A  |
| YIL015W   | 382.995389 | 320.191734 | 356.496495 | 195.361033 | 195.469927 | 200.588719 | -0.841217729 | 8.10495126 | 1.03508E-18 | BAR1       |
| YJL150W   | 0.06576157 | 0.05755739 | 0.12105144 | 0          | 0.06515664 | 0.06456026 | -0.844870037 | -2.4277052 | 0.693020493 | YJL150W    |
| YGL258W-A | 0.13152314 | 0.11511477 | 0          | 0          | 0.06515664 | 0.06456026 | -0.845327649 | -2.4276517 | 0.693178369 | YGL258W-A  |
| YBR067C   | 484.662777 | 399.793597 | 452.006083 | 254.962704 | 250.983386 | 236.548783 | -0.84778185  | 8.43724525 | 6.79365E-18 | TIP1       |
| YPL280W   | 0.19728471 | 0.51801647 | 0.54473149 | 0.05912864 | 0.06515664 | 0.58104232 | -0.858004221 | -1.1387644 | 0.207232911 | HSP32      |
| YFL026W   | 1070.07228 | 868.253155 | 1038.9224  | 479.947187 | 571.358596 | 590.338992 | -0.858853924 | 9.588599   | 3.96906E-14 | STE2       |
| YIL111W   | 22.3589341 | 23.310741  | 22.333991  | 12.1213716 | 13.3571117 | 12.0082079 | -0.859775068 | 4.147935   | 1.1302E-11  | COX5B      |
| YKL029C   | 339.461229 | 295.442058 | 334.64671  | 158.464761 | 185.826744 | 188.451391 | -0.863964771 | 7.96874271 | 1.90234E-17 | MAE1       |
| YKR033C   | 0.460331   | 0.28778693 | 0.42368005 | 0.23651457 | 0.32578321 | 0.06456026 | -0.864667649 | -1.2400941 | 0.167219443 | YKR033C    |
| YOL085W-A | 0.13152314 | 0.11511477 | 0.12105144 | 0          | 0          | 0.19368077 | -0.879405329 | -2.2052737 | 0.520228971 | YOL085W-A  |
| YOL104C   | 16.703439  | 12.9504117 | 14.526173  | 7.21369433 | 8.99161663 | 7.61811036 | -0.890067136 | 3.5178428  | 9.93591E-08 | NDJ1       |
| YOR214C   | 0.98642356 | 0.80580339 | 1.1499887  | 0.41390049 | 0.71672306 | 0.4519218  | -0.890473521 | -0.188247  | 0.039986805 | SPR2       |
| YOL109W   | 77.4671305 | 99.4016041 | 70.0887847 | 53.6296783 | 41.8305643 | 37.2512684 | -0.89536624  | 5.98797073 | 3.70353E-10 | ZEO1       |
| YGR121W-A | 0.13152314 | 0.17267216 | 0.18157716 | 0.05912864 | 0          | 0.19368077 | -0.89795059  | -2.0128857 | 0.404556465 | YGR121W-A  |
| YLR452C   | 189.985178 | 203.465356 | 195.074398 | 103.356866 | 105.879544 | 106.588985 | -0.898162639 | 7.23730539 | 1.82255E-27 | SST2       |
| YGR138C   | 84.7666648 | 72.9827644 | 79.1071171 | 42.5134936 | 43.720107  | 40.7375223 | -0.89872547  | 5.92541458 | 7.41545E-23 | TPQ2       |
| YMR006C   | 270.345818 | 203.062455 | 258.868508 | 127.895253 | 133.766587 | 128.08755  | -0.909598339 | 7.54789426 | 1.22376E-16 | PLB2       |
| YOR225W   | 7.95715007 | 10.014985  | 6.05257208 | 3.72510445 | 4.75643489 | 4.32553724 | -0.910047537 | 2.65116434 | 4.89498E-05 | YOR225W    |
| YEL070W   | 3.81417111 | 2.35985279 | 2.9052346  | 1.41908741 | 1.10766292 | 2.259609   | -0.916258327 | 1.27998389 | 0.002176788 | DSF1       |
| YFL065C   | 0.13152314 | 0.11511477 | 0.60525721 | 0.17738593 | 0.13031328 | 0.12912051 | -0.92438102  | -1.5536389 | 0.225547703 | YFL065C    |
| YPL187W   | 0.26304628 | 0.34534431 | 0.24210288 | 0.23651457 | 0.13031328 | 0.06456026 | -0.925032392 | -1.5538847 | 0.214894959 | MF(ALPHA)1 |
| YDR401W   | 0.26304628 | 0.46045908 | 0          | 0.35477185 | 0          | 0          | -0.925339445 | -1.6919382 | 0.289176857 | YDR401W    |
| YKR034W   | 0.52609257 | 0.17267216 | 0.18157716 | 0          | 0.13031328 | 0.32280129 | -0.927001354 | -1.552363  | 0.223730701 | DAL80      |
| YBR085W   | 18.2817167 | 18.5910354 | 18.4603448 | 9.04668223 | 9.38255649 | 10.5233219 | -0.935120531 | 3.82691392 | 1.19483E-11 | AAC3       |
| YIL119C   | 41.4297896 | 44.5494161 | 41.9443245 | 18.0342358 | 22.7396681 | 25.6304221 | -0.947866942 | 5.02384736 | 3.61487E-14 | RPI1       |
| YGR107W   | 0.92066199 | 0.97847555 | 1.21051442 | 0.47302914 | 0.78187971 | 0.32280129 | -0.97576098  | -0.1388546 | 0.015691906 | YGR107W    |
| YER148W-A | 4.80059467 | 4.48947604 | 2.42102883 | 2.83817482 | 1.30313285 | 1.74312695 | -0.981127971 | 1.61863866 | 0.002569442 | YER148W-A  |
| YJR022W   | 1.1179467  | 1.49649201 | 1.7552459  | 0.41390049 | 1.2379762  | 0.58104232 | -0.981594524 | 0.29640901 | 0.009872736 | LSM8       |
| YMR107W   | 0.52609257 | 0.34534431 | 0.18157716 | 0.11825728 | 0.26062657 | 0.12912051 | -1.015714006 | -1.3879168 | 0.133730956 | SPG4       |
| YPR077C   | 0.32880785 | 0          | 0.48420577 | 0.23651457 | 0          | 0.12912051 | -1.041576446 | -1.6434326 | 0.20246835  | YPR077C    |
| YNL145W   | 0.59185414 | 0.69068862 | 1.08946297 | 0.47302914 | 0.26062657 | 0.38736154 | -1.060138302 | -0.4902384 | 0.023777977 | MFA2       |
| YLR154W-F | 0.19728471 | 0          | 0.36315432 | 0.05912864 | 0.13031328 | 0.06456026 | -1.064351387 | -1.953558  | 0.28976283  | YLR154W-F  |
| YOR255W   | 0          | 0.34534431 | 0.06052572 | 0          | 0.06515664 | 0.12912051 | -1.081307205 | -2.138871  | 0.362579157 | OSW1       |
| YBL094C   | 0.19728471 | 0.51801647 | 0.36315432 | 0.11825728 | 0          | 0.38736154 | -1.087990476 | -1.350567  | 0.10261321  | YBL094C    |
| YDR545W   | 308.290244 | 272.994678 | 313.523234 | 136.29152  | 144.517433 | 137.836149 | -1.095775303 | 7.7751553  | 9.62075E-32 | YRF1-1     |
| YLR467W   | 308.290244 | 272.994678 | 313.523234 | 136.29152  | 144.517433 | 137.836149 | -1.095775317 | 7.7751553  | 9.89808E-32 | YRF1-5     |
| YOR396W   | 308.290244 | 272.994678 | 313.523234 | 136.29152  | 144.517433 | 137.836149 | -1.095775323 | 7.7751553  | 1.00122E-31 | YRF1-8     |
| YBR157C   | 42.4162132 | 55.8306636 | 45.1521877 | 21.7593403 | 22.218415  | 22.1441682 | -1.117870133 | 5.13343384 | 5.7122E-21  | ICS2       |
| YJR023C   | 1.05218513 | 1.66916417 | 0.72630865 | 0.82780099 | 0.32578321 | 0.38736154 | -1.13791402  | -0.0456847 | 0.007490436 | YJR023C    |
| YGR240C-A | 0.06576157 | 0.11511477 | 0.12105144 | 0.05912864 | 0.06515664 | 0          | -1.142094152 | -2.3500021 | 0.462621239 | YGR240C-A  |
| YJL007C   | 0.06576157 | 0.05755739 | 0.18157716 | 0.05912864 | 0.06515664 | 0          | -1.142934693 | -2.3499047 | 0.462856353 | YJL007C    |
| YMR189W   | 637.821476 | 550.536389 | 604.228271 | 267.616234 | 262.450955 | 271.863243 | -1.160388916 | 8.7567773  | 5.62982E-35 | GCV2       |
| YGL032C   | 24.5948275 | 18.1881337 | 19.5498078 | 11.884857  | 7.49301386 | 8.39283344 | -1.161282613 | 3.92187214 | 7.25493E-10 | AGA2       |
| YGR234W   | 453.36027  | 582.65341  | 466.411204 | 226.994857 | 224.855572 | 218.471911 | -1.164432763 | 8.50110893 | 3.89751E-27 | YHB1       |
| YAR071W   | 25.9758205 | 28.3757909 | 23.5445054 | 14.6639032 | 9.38255649 | 10.0714001 | -1.187509986 | 4.23595282 | 2.31043E-12 | PHO11      |
| YKR040C   | 1.51251613 | 0.97847555 | 1.4526173  | 0.29564321 | 0.78187971 | 0.64560257 | -1.193606316 | 0.08958215 | 0.002694977 | YKR040C    |
| YJL012C   | 665.507097 | 619.317464 | 629.709599 | 295.938853 | 265.578474 | 272.637966 | -1.198437791 | 8.84007054 | 5.04856E-38 | VT4        |
| YHR049C-A | 0.13152314 | 0.51801647 | 0.66578293 | 0.17738593 | 0          | 0.38736154 | -1.207612459 | -1.1726028 | 0.071816104 | YHR049C-A  |
| YEL020C-B | 2.89350912 | 5.23772205 | 3.26838892 | 1.53734469 | 2.28048248 | 1.09752437 | -1.216802937 | 1.52122352 | 0.000108691 | YEL020C-B  |
| YGL033W   | 1.18370828 | 1.26626247 | 0.66578293 | 0.41390049 | 0.4560965  | 0.4519218  | -1.224668552 | -0.2060782 | 0.003574595 | HOP2       |
| YNR073C   | 5.32668724 | 5.46795159 | 6.1130978  | 2.01037383 | 2.54110905 | 2.64697055 | -1.234491454 | 2.05455854 | 5.88035E-09 | YNR073C    |
| YPL261C   | 0.13152314 | 0.23022954 | 0.12105144 | 0.11825728 | 0.06515664 | 0          | -1.273861086 | -2.0746087 | 0.241884346 | YPL261C    |
| YNL319W   | 0.13152314 | 0.17267216 | 0.18157716 | 0.11825728 | 0.06515664 | 0          | -1.27467136  | -2.0745118 | 0.241571563 | YNL319W    |
| YHR208W   | 803.146065 | 731.784595 | 761.897773 | 285.709598 | 311.64422  | 347.398744 | -1.281685318 | 9.07791917 | 4.71989E-37 | BAT1       |
| YBR093C   | 92.3950071 | 72.176961  | 78.0781798 | 31.7520808 | 31.4055016 | 34.9916594 | -1.305027643 | 5.83121052 | 3.38004E-34 | PHO5       |
| YDL086C-A | 7.29953437 | 3.45344311 | 1.81577162 | 2.54253161 | 2.47595241 | 0          | -1.317443315 | 1.60438746 | 0.08751682  | YDL086C-A  |
| YEL020W-A | 4.60330996 | 6.79177145 | 5.44731487 | 1.95124519 | 2.73657898 | 2.00136798 | -1.336716089 | 2.02635889 | 2.69758E-08 | TIM9       |
| YER072W   | 211.554973 | 186.255698 | 201.187496 | 89.2842494 | 74.864982  | 71.7910061 | -1.343226796 | 7.12223517 | 5.71389E-41 | VT1        |
| YBL008W-A | 0          | 0.17267216 | 0.18157716 | 0          | 0.13031328 | 0          | -1.383828904 | -2.2761089 | 0.301504412 | YBL008W-A  |
| YOL097W-A | 0.26304628 | 0.11511477 | 0          | 0          | 0          | 0.12912051 | -1.390683109 | -2.2754408 | 0.301990427 | YOL097W-A  |
| YNR044W   | 188.078093 | 152.642185 | 181.032431 | 49.0176442 | 67.2416548 | 76.3102241 | -1.438441473 | 6.89707617 | 7.92898E-26 | AGA1       |
| YHR212W-A | 0.26304628 | 0.17267216 | 0.12105144 | 0.11825728 | 0          | 0.06456026 | -1.439850998 | -2.0128654 | 0.160149916 | YHR212W-A  |
| YML058W-A | 0.85490042 | 0.28778693 | 0.12105144 | 0.17738593 | 0.06515664 | 0.19368077 | -1.442764917 | -1.3115351 | 0.038113913 | HUC1       |
| YGL009C   | 1199.42529 | 1060.78261 | 1112.76538 | 435.068548 | 419.934559 | 380.776397 | -1.448499404 | 9.58549801 | 1.48261E-48 | LEU1       |
| YHL028W   | 159.537571 | 150.455005 | 160.635263 | 54.8122511 | 60.2698941 | 56.2965443 | -1.457527937 | 6.74365169 | 7.01666E-66 | WSC4       |

|           |            |            |            |            |            |            |              |            |             |           |
|-----------|------------|------------|------------|------------|------------|------------|--------------|------------|-------------|-----------|
| YFR034W-A | 0.460331   | 0.80580339 | 0.48420577 | 0.23651457 | 0.13031328 | 0.25824103 | -1.458682916 | -0.9264811 | 0.010588902 | YFR034W-A |
| YCL027W   | 37.3525723 | 36.8367265 | 36.3759582 | 13.0083012 | 14.0738347 | 12.2018886 | -1.4924803   | 4.6516144  | 1.86636E-38 | FUS1      |
| YOR383C   | 96.077655  | 85.8756186 | 107.856834 | 33.7624546 | 34.793647  | 34.1523761 | -1.496266121 | 6.03517043 | 1.171E-50   | FIT3      |
| YNL266W   | 0.92066199 | 0.17267216 | 0.24210288 | 0          | 0.19546993 | 0.25824103 | -1.509479724 | -1.2742024 | 0.031980036 | YNL266W   |
| YKL120W   | 109.493015 | 140.958036 | 115.967281 | 40.9170203 | 43.2640105 | 44.3528967 | -1.512062737 | 6.36961243 | 9.8808E-48  | OAC1      |
| YDR281C   | 2.69622441 | 2.82031187 | 2.72365574 | 0.82780099 | 0.71672306 | 1.29120515 | -1.535227616 | 0.98536544 | 1.47249E-07 | PHM6      |
| YBR040W   | 2.0386087  | 2.93542664 | 2.11840023 | 0.65041506 | 0.71672306 | 1.03296412 | -1.565413407 | 0.78315677 | 1.08042E-06 | FIG1      |
| YDR114C   | 0.19728471 | 0.17267216 | 0.42368005 | 0          | 0          | 0.25824103 | -1.571837364 | -1.7397474 | 0.063349693 | YDR114C   |
| YMR321C   | 1.51251613 | 1.03603293 | 1.08946297 | 0.41390049 | 0.4560965  | 0.32280129 | -1.5803959   | -0.105921  | 8.35409E-05 | YMR321C   |
| YJL052W   | 425.411602 | 290.77991  | 343.907146 | 122.159774 | 106.075014 | 119.952958 | -1.605883654 | 7.87556099 | 8.83477E-36 | TDH1      |
| YDL187C   | 0.78913885 | 0.46045908 | 0.36315432 | 0.11825728 | 0.13031328 | 0.25824103 | -1.619807887 | -1.0737846 | 0.006470497 | YDL187C   |
| YHR214W   | 22.4246957 | 21.814249  | 27.2365574 | 7.86410939 | 7.29754393 | 7.74723087 | -1.639997453 | 3.99034934 | 8.96888E-28 | YHR214W   |
| YJR047C   | 16.4403927 | 11.7417066 | 14.7077502 | 4.78942    | 4.03971182 | 4.13185646 | -1.720292457 | 3.2393236  | 1.12914E-19 | ANB1      |
| YHR216W   | 141.255854 | 113.963623 | 139.693364 | 39.7935761 | 41.2441546 | 36.8639069 | -1.743272833 | 6.41991542 | 2.97548E-65 | IMD2      |
| YOR382W   | 32.8807854 | 28.6060204 | 43.9416733 | 7.50933754 | 10.3599061 | 13.2348527 | -1.762594541 | 4.51765363 | 5.82465E-19 | FIT2      |
| Q0250     | 0          | 0.05755739 | 0.42368005 | 0.11825728 | 0          | 0          | -1.782590202 | -2.1388449 | 0.125816964 | COX2      |
| YIL177C   | 2.0386087  | 1.78427894 | 2.60260599 | 0          | 0          | 1.8076872  | -1.822964707 | 0.58205365 | 0.043923087 | YIL177C   |
| YHR214W-A | 19.925756  | 18.5910354 | 24.6339684 | 4.90767729 | 4.82159153 | 8.07003216 | -1.827622578 | 3.77047489 | 2.96493E-19 | YHR214W-A |
| YDR342C   | 1124.58862 | 881.203567 | 959.211623 | 305.162921 | 251.569796 | 257.530866 | -1.864248088 | 9.29928435 | 2.58545E-56 | HXT7      |
| YPL019C   | 466.183776 | 557.615947 | 501.6977   | 138.301894 | 134.222683 | 129.766117 | -1.922924016 | 8.32870614 | 8.02248E-84 | VTC3      |
| YBR072W   | 62.8680617 | 63.370681  | 51.2047598 | 18.9802941 | 14.1389914 | 13.557654  | -1.923320008 | 5.23013837 | 1.08218E-44 | HSP26     |
| YOR186C-A | 0.13152314 | 0.05755739 | 0.12105144 | 0.05912864 | 0          | 0          | -1.935741761 | -2.4278523 | 0.227217692 | YOR186C-A |
| YDR461W   | 0.26304628 | 0          | 0.06052572 | 0          | 0.06515664 | 0          | -1.938063907 | -2.4272726 | 0.228300187 | MFA1      |
| YLR461W   | 0.19728471 | 0.05755739 | 0.3026286  | 0.05912864 | 0          | 0.06456026 | -1.947295799 | -2.0741395 | 0.074790244 | PAU4      |
| YIL021C-A | 0.460331   | 0.4029017  | 0.66578293 | 0.29564321 | 0          | 0.06456026 | -1.959032017 | -1.1723427 | 0.002188711 | YIL021C-A |
| YER084W-A | 0.460331   | 0.4029017  | 0          | 0          | 0.19546993 | 0          | -2.052541739 | -1.739604  | 0.020585071 | YER084W-A |
| YOR391C   | 0.65761571 | 0.34534431 | 0.18157716 | 0.11825728 | 0.13031328 | 0          | -2.115464561 | -1.4682107 | 0.005022179 | HSP33     |
| YHR214C-E | 0.13152314 | 0.4029017  | 0.24210288 | 0          | 0.06515664 | 0.06456026 | -2.451044117 | -1.8435176 | 0.010413972 | YHR214C-E |
| YML047C   | 0.85490042 | 0.57557385 | 0.72630865 | 0.17738593 | 0.06515664 | 0.06456026 | -2.684528546 | -0.8976877 | 8.96259E-06 | PRM6      |
| YML123C   | 1845.59849 | 1622.77292 | 1930.52839 | 260.639054 | 269.096933 | 295.363177 | -2.710038934 | 10.0189191 | 8.5887E-139 | PHO84     |
| YJR150C   | 3.1565554  | 2.76275449 | 3.51049181 | 0.59128642 | 0.13031328 | 0.38736154 | -3.036038463 | 0.92293344 | 2.16445E-18 | DAN1      |
| YHR215W   | 135.731882 | 139.979561 | 135.032883 | 16.7334057 | 15.3769676 | 15.1071002 | -3.118950642 | 6.25799498 | 2.9646E-238 | PHO12     |
| YCR104W   | 0.13152314 | 0.34534431 | 0.24210288 | 0          | 0          | 0.06456026 | -3.131788773 | -1.9545109 | 0.004664682 | PAU3      |
| YHR136C   | 16.3088696 | 19.8572979 | 16.2814189 | 1.18257284 | 1.36828949 | 1.22664489 | -3.790632387 | 3.25708303 | 1.16146E-69 | SPL2      |
| YMR175W   | 0.06576157 | 0.23022954 | 0.06052572 | 0          | 0          | 0          | -4.065758896 | -2.4282515 | 0.034326818 | SIP18     |
| YOR392W   | 0.19728471 | 0          | 0.18157716 | 0          | 0          | 0          | -4.072120839 | -2.4275588 | 0.034318637 | YOR392W   |
| YDL133C-A | 0          | 0.23022954 | 0.18157716 | 0          | 0          | 0          | -4.274311136 | -2.350438  | 0.017833004 | RPL41B    |
| YDL247W   | 0.78913885 | 0          | 0          | 0          | 0          | 0          | -5.07978489  | -2.0114028 | 0.003494683 | MPH2      |
| YBR161W   | 45.507007  | 40.347727  | 41.0969644 | 0.11825728 | 0.06515664 | 0.06456026 | -8.852897915 | 4.41851178 | 4.4896E-237 | CSH1      |
| YPL057C   | 89.3042132 | 70.3351246 | 88.9728096 | 0          | 0.19546993 | 0.12912051 | -9.524243016 | 5.38098777 | 0           | SUR1      |
| YDR297W   | 263.703899 | 203.350242 | 252.997513 | 0          | 0.39093985 | 0.12912051 | -10.41794237 | 6.91024838 | 0           | SUR2      |
| YMR272C   | 283.695417 | 218.545391 | 279.689356 | 0.17738593 | 0.26062657 | 0.06456026 | -10.53800541 | 7.02891558 | 0           | SCS7      |



## SUPPORTING INFORMATION

### SUPPLEMENTARY MATERIALS AND METHODS

**Yeast strains** - Disruption of genes was performed by replacing their ORFs with the *kanMX4* marker from a genome from a yeast knockout library, or pFA6a-*kanMX4*, the *hphNT1* marker from pFA6a-*hphNT1*, the *natMX4* marker from p4339 (pCRII-TOPO::*natMX4*), the *URA3* marker from pRS406, the *LEU2* marker from pRS405, the *HIS3* marker from pRS313, or the *MET15* marker from p3xFLAG-CMV-7.1-MET15 (information on this plasmid is given under “Plasmids”). Occasionally, *kanMX4* and *natMX4* were replaced with the hygromycin B-resistance gene (from the pFA6a-*hphNT1* vector) to create *hphMX4*. For tagging of the N-terminus of Rim101 with a yeast enhanced green fluorescent protein (yeGFP) tag, a yeGFP fusion cassette with the TEF promoter and *natNT2* marker from pYM-N21 was introduced immediately downstream of the initiator ATG of chromosomal *RIM101* as described previously (Janke *et al.*, 2004). For tagging of the C-terminus of Slt2 with six copies of the HA epitope (6xHA), a 6xHA fusion cassette with the *hphNT1* marker from pYM16 was introduced immediately upstream of the stop codon of chromosomal *SLT2* as described previously (Janke *et al.*, 2004). For tagging of the C-terminus of Pil1 with yeGFP, a yeGFP fusion cassette with the *hphNT1* marker from pYM25 was introduced immediately upstream of the stop codon of chromosomal *PIL1* as described previously (Janke *et al.*, 2004).

**Plasmids** - p3xFLAG-CMV-7.1-MET15 containing *MET15*, and its 5'- and 3'-untranslated regions (500 bp each) was constructed as described below. A DNA fragment was amplified by PCR using a 5' primer with a *Bam*HI site (5'-AAGGATCCAGATTGTACTGAGAGTGCACATTTAATGCTATAATAGACATTTAAATCCA-3'), a 3' primer with a *Not*I site (5'-AGAGCGGCCCGCCTGTGCGGTATTTACACCCGCCAAGTTCACCTATTCTGACT-

3'), and genomic DNA of the SEY6210.1 strain as a template. The fragment obtained was subcloned into p3xFLAG-CMV-7.1 (Sigma Aldrich, St. Louis, MO, USA). pRS416-6xSTRE-MEL1, a plasmid expressing  $\alpha$ -galactosidase (Mel1) under the control of six tandem repeats of the stress response element (STRE; AGGGG), and an *LEU2* upstream sequence containing both its transcriptional and translational start sites but lacking the leucine-responsive region (Martinez-Arias *et al.*, 1984; Marchler *et al.*, 1993), was constructed as described in (Yamaguchi *et al.*, 2018). Briefly, the *MEL1* ORF was amplified by PCR using a 5' primer (5'-GGATATACCATTCTAATGTTTGCTTTCTACTTTCTCACC-3'), a 3' primer with a *NotI* site (5'-AGAGCGGCCGCGTGGAACACCAACGCCACTA-3'), and pT7Blue+MEL1 (provided by the National Bio-Resource Project (NBRP), Japan) as a template. The upstream sequence of *LEU2* was amplified by PCR using a 5' primer with a *EcoRI* site (5'-CAAGAATTCCCGACAATATTATTTAAGGACCTATTGTT-3'), a 3' primer (5'-AAAGCAAACATTAGAATGGTATATCCTTGAAATATATATATATAT-3'), and pRS405 (Sikorski and Hieter, 1989) as a template. These two DNA fragments were extended by PCR, and then subcloned into pRS416 (Sikorski and Hieter, 1989) (pRS416-*LEU2-MEL1*). A DNA fragment containing STRE was obtained by dimerization of a 5' primer (5'-GATAAGCTTGGTAAGGGGCCAAGGTAAGGGGCCAAGGTAAGGGGCCAAGGT AAGGGGCCAAGGTAAGGGGCCAAGGTAAGGGGCCAAGAATTCAAC-3') and a 3' primer (5'-GTTGAATTCTTGGCCCCTTACCTTGGCCCCTTACCTTGGCCCCTTACCTTGGC CCCTTACCTTGGCCCCTTACCTTGGCCCCTTACCAAGCTTATC-3'), both of which contain *HindIII* and *EcoRI* sites. The DNA fragment was digested with *HindIII* and *EcoRI*, and then subcloned into pRS416-*LEU2-MEL1*. pRS415-*NCW2p-MEL1*, pRS415-*SED1p-MEL1*, or pRS415-*CRH1p-MEL1*, a plasmid expressing *MEL1* under the

control of the potential promoter region of *NCW2*, *SEDI*, or *CRHI*, was constructed as follows. The 5'-untranslated region (1,000 bp) of each gene was amplified by PCR using a 5' primer with a *Bam*HI site (5'-AGAGGATCCGGATATGATTGCTGAGAATGCGT-3' (for *NCW2*), 5'-AGAGGATCCAGGATTTTAATCTGTTGGAGTTAAG-3' (for *SEDI*), or 5'-AGAGGATCCATGCAGATCTTCTTATTCTATATAAGAG-3' (for *CRHI*)), a 3' primer (5'-TAGAAAGCAAACATTTTATATATATGTTGGGTTTGTATATTTTCA-3' (for *NCW2*), 5'-TAGAAAGCAAACATCTTAATAGAGCGAACGTATTTTATTTT-3' (for *SEDI*), 5'-TAGAAAGCAAACATGGTTTTTTGCTGTATTGAATTATTATG-3' (for *CRHI*)), and yeast genomic DNA as a template. The *MEL1* ORF was amplified by PCR using a 5' primer (5'-AACCCAACATATATATAAAAATGTTTGCTTTCTACTTTCTCAC-3' (for *NCW2*), 5'-CGCTCTATTAAGATGTTTGCTTTCTACTTTCTCAC-3' (for *SEDI*), or 5'-AGCAAAAACCATGTTTGCTTTCTACTTTCTCAC-3' (for *CRHI*)), a 3' primer with a *Not*I site (5'-AGAGCGGCCGCGTGGAACACCAACGCCACTA-3'), and pT7Blue+*MEL1* as a template. These two DNA fragments were extended by PCR. The fragment obtained was digested with *Bam*HI and *Not*I, and then subcloned into pRS415.

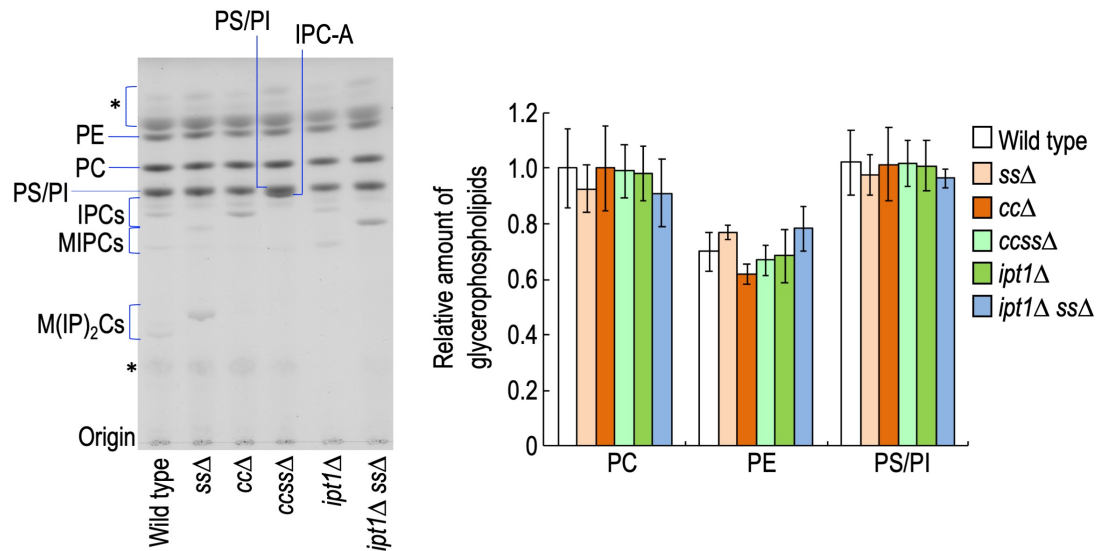

**Figure S1. Glycerophospholipid analysis of wild-type (MTY174), *ssΔ*, *ccΔ*, *ccssΔ*, *ipt1Δ*, and *ipt1Δ ssΔ* cells.**

Cells were cultured overnight in YPD medium at 30°C, diluted (0.3 OD<sub>600</sub> units/ml) in fresh YPD medium, and then incubated for 5 h at 30°C. Lipids were extracted from cells (1 OD<sub>600</sub> U) with ethanol/water/diethyl ether/pyridine/15 M ammonia (15:15:5:1:0.018, v/v), and then separated on Silica Gel 60 TLC plates with chloroform/methanol/4.2 M ammonia (9:7:2, v/v) as the solvent system. Lipids were visualized with a copper sulfate and orthophosphoric acid reagent. The amount of PC in wild-type cells was taken as 1. Data represent means ± SD for one experiment (triplicate) representative of three independent experiments. The asterisk indicates unidentified bands. The details are given under Materials and Methods.

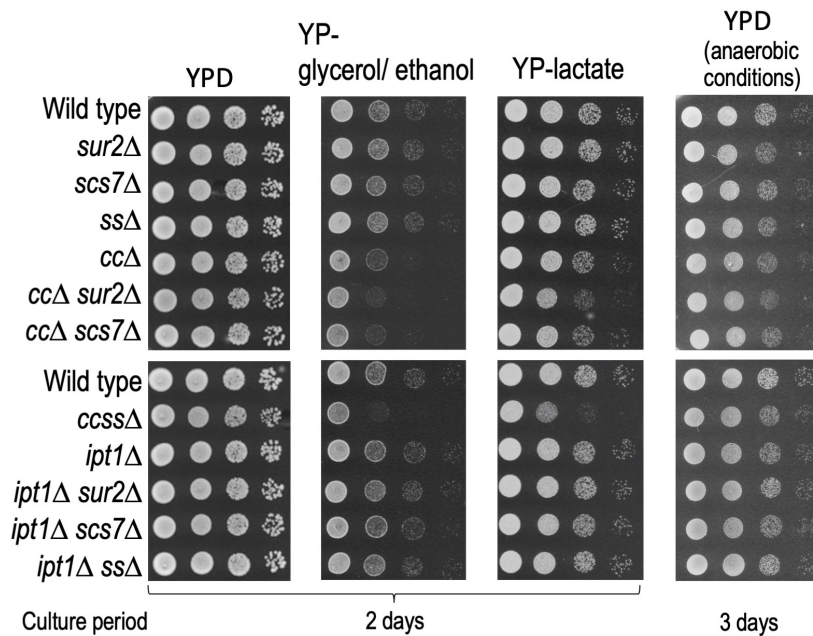

**Figure S2. Growth of mutant cells of the complex sphingolipid disruption library on medium containing different carbon sources.**

Cells cultured overnight in YPD medium at 30°C were spotted onto YPD, YP-glycerol/ethanol (1% yeast extract, 2% peptone, 3% glycerol, and 3% ethanol (pH 6.0)), or YP-lactate (1% yeast extract, 2% peptone, and 2% lactate (pH 6.0)) plates, and then incubated at 30°C for the indicated days. Anaerobic conditions (YPD plate) were obtained with an AnaeroPack Kenki system (Mitsubishi Gas Chemical, Tokyo, Japan). The details are given under Materials and Methods.

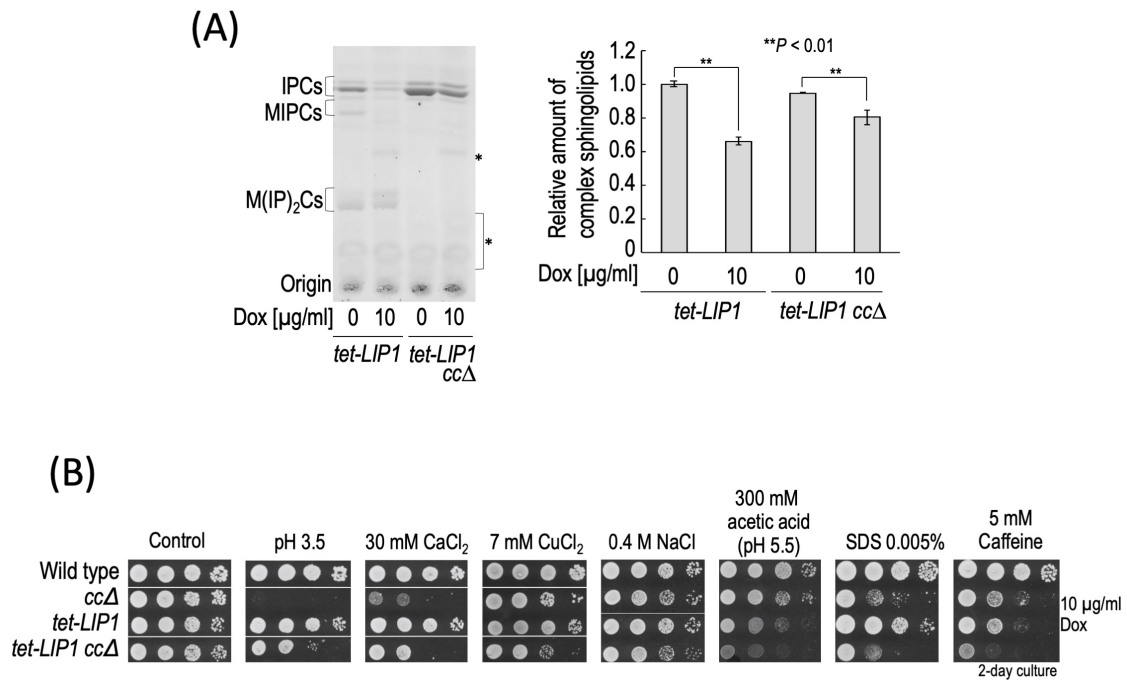

**Figure S3. Effect of *LIP1* repression on stress sensitivities of *CSG1*- and *CSH1*-deleted cells.**

(A) Effect of *LIP1* repression on complex sphingolipid levels. *tet-LIP1* cells (BY4741, *tetO7-LIP1::kanMX4*) (Toume and Tani, 2016) and *tet-LIP1 ccΔ* cells (BY4741, *tetO7-LIP1::kanMX4 csg1Δ::natMX4 csh1Δ::hphNT1*) (Otsu *et al.*, 2020) were cultured overnight in YPD medium with or without 10 µg/ml Dox at 30°C, diluted (0.3 OD<sub>600</sub> units/ml) in fresh YPD medium with or without 10 µg/ml Dox, and then incubated for 3 h at 30°C. TLC analysis were performed as described in Fig. 1D. The amount of complex sphingolipids (IPCs, MIPCs, and M(IP)<sub>2</sub>Cs) in Dox-untreated *tet-LIP1* cells was taken as 1. Data represent means ± SD for one experiment (triplicate) representative of three independent experiments. The asterisk indicates unidentified bands. (B) Effect of *LIP1* repression on stress sensitivities. Cells cultured overnight in YPD medium with or without 10 µg/ml Dox were spotted onto YPD plates containing 30 mM CaCl<sub>2</sub>, 7 mM CuCl<sub>2</sub>, 0.4 M NaCl, 300 mM acetic acid (adjusted to pH 5.5 by the addition of 50 mM MES and MOPS), SDS 0.005%, 5 mM caffeine, or 10 µg/ml Dox, and then incubated for 2 days. YPD plates (pH 3.5) were prepared by the addition of 100 mM Gly-HCl. The details are given under Materials and Methods.

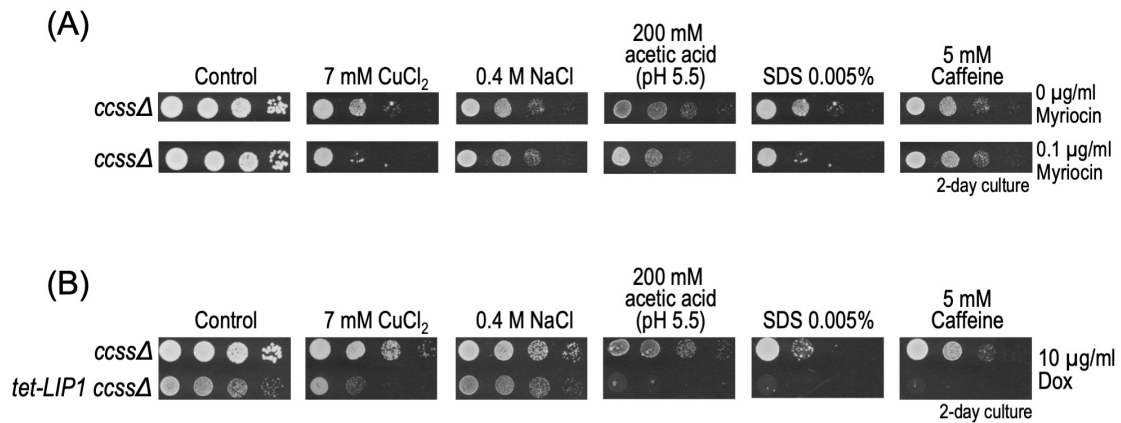

**Figure S4. Effects of myriocin (A) or *LIP1* repression (B) on stress sensitivities of *ccssΔ* cells.**

*ccssΔ* cells and *tet-LIP1 ccssΔ* cells (BY4741, *tetO<sub>7</sub>-LIP1::kanMX4 csg1Δ::natMX4 csh1Δ::hphNT1 sur2Δ::URA3 scs7Δ::LEU2*) were cultured overnight in YPD medium with or without 10 µg/ml Dox, and then spotted onto YPD plates (the details of the composition of the medium are given under Fig. S3). Plates were incubated at 30°C for 2 days. The details are given under Materials and Methods.

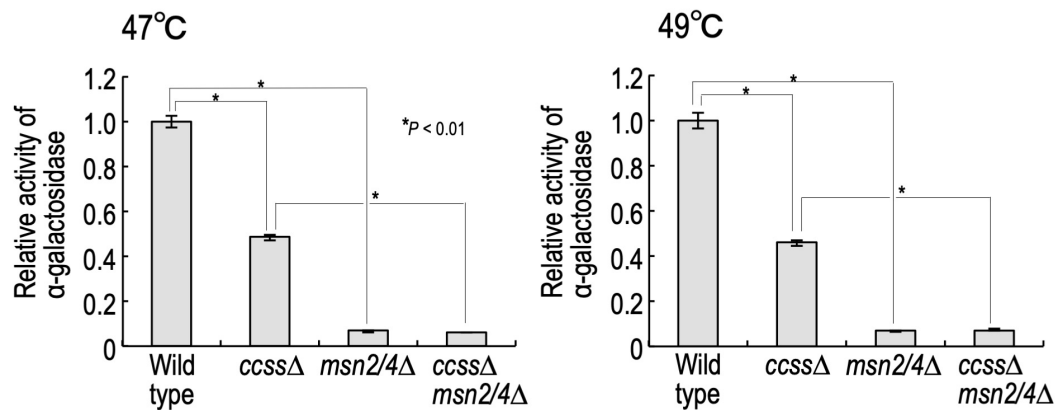

**Figure S5. STRE-mediated transcriptional activity after heat stress.**

Cells harboring pRS416-6xSTRE-MEL1 were cultured overnight in SC medium lacking uracil (SC-Ura), diluted (0.3 OD<sub>600</sub> units/ml) in fresh SC-Ura medium, and then incubated for 5 h at 30°C. Cells were incubated at 47 or 49°C for 1 h, harvested, and then  $\alpha$ -galactosidase activity was measured. Data represent means  $\pm$  SD for one experiment (triplicate) representative of three independent experiments. The details are given under Materials and Methods.



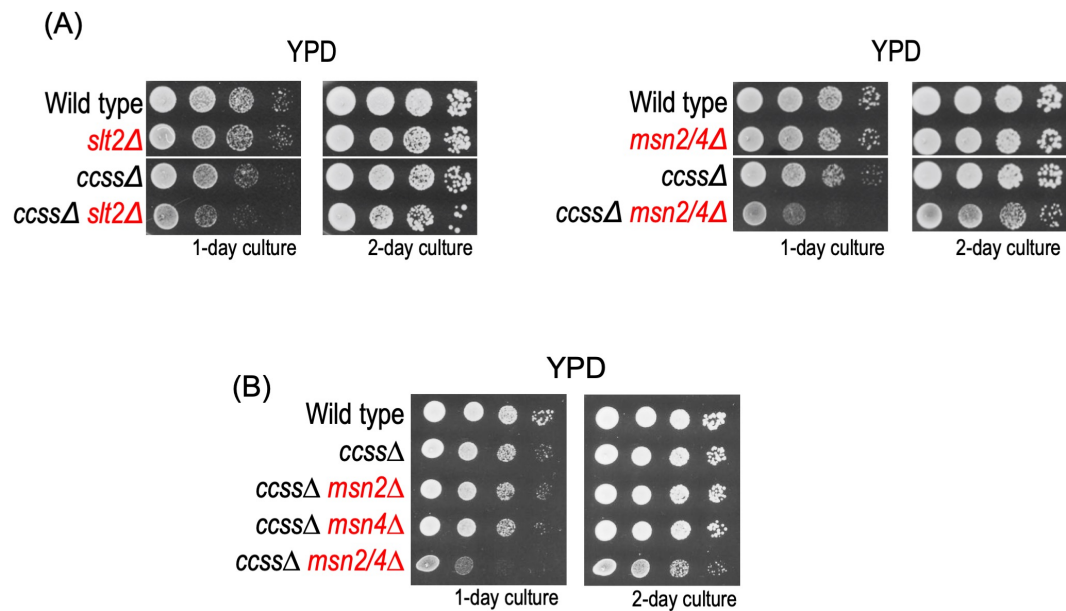

**Figure S6. Effect of deletion of *SLT2*, *MSN2*, or *MSN4* on the growth of *ccssΔ* cells.**

(A) Wild-type, *ccssΔ*, *slt2Δ*, *ccssΔ slt2Δ*, *msn2/4Δ*, and *ccssΔ msn2/4Δ* cells cultured overnight in YPD medium at 30°C were spotted onto YPD plates, and then incubated at 30°C for the indicated numbers of days. (B) Wild-type, *ccssΔ*, *ccssΔ msn2Δ*, *ccssΔ msn4Δ*, and *ccssΔ msn2/4Δ* cells cultured overnight in YPD medium at 30°C were spotted onto YPD plates and then incubated at 30°C for the indicated numbers of days. The details are given under Materials and Methods.

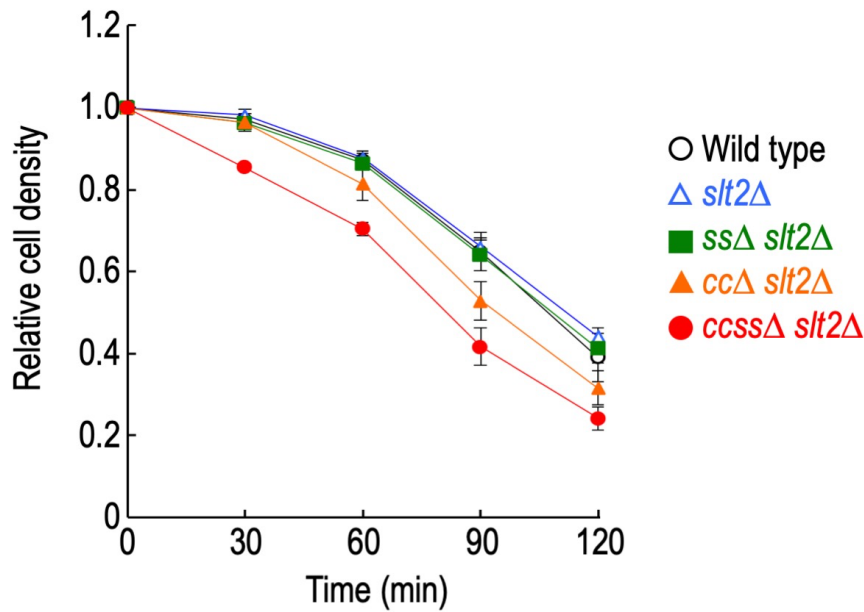

**Figure S7. Zymolyase sensitivity of wild-type, *slt2*Δ, *ss*Δ *slt2*Δ, *cc*Δ *slt2*Δ, and *ccss*Δ *slt2*Δ cells.**

Cells were cultured overnight in YPD medium at 30°C, diluted (0.3 OD<sub>600</sub> units/ml) in fresh YPD medium, and then incubated for 5 h at 30°C. They were then washed with 20 mM HEPES buffer (pH 7.5), resuspended (1.5 OD<sub>600</sub> units/ml) in the same buffer containing 15 μg/ml zymolyase-20T (Nacalai Tesque), and incubated at 30°C. At the indicated times, cell density (OD<sub>600</sub>) in the cell suspensions was measured. Data represent means ± SD for one experiment (triplicate) representative of three independent experiments.

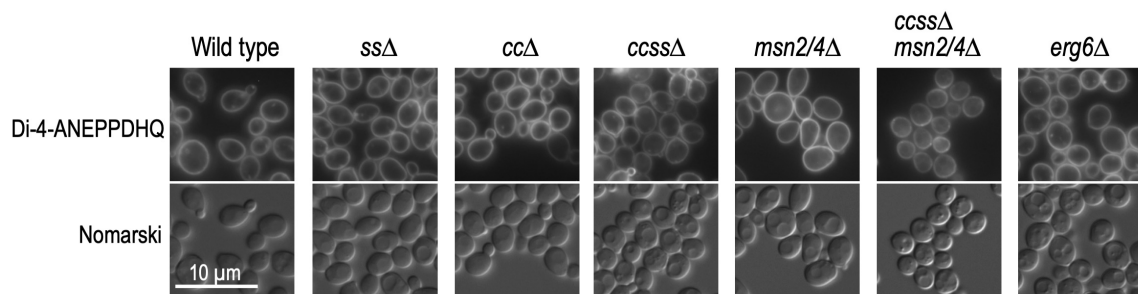

**Figure S8. Fluorescent image of di-4-ANEPPDHQ-stained cells.**

Cells were cultured overnight in YPD medium at 30°C, diluted (0.3 OD<sub>600</sub> units/ml) in fresh YPD medium, and then incubated for 5 h at 30°C. Cells (1 OD<sub>600</sub> units) were resuspended in 100  $\mu$ l of fresh YPD medium containing 5  $\mu$ M di-4-ANEPPDHQ, and then incubated for 1 min at 30°C. Cells were washed with water, and green fluorescence was observed under fluorescence microscope.

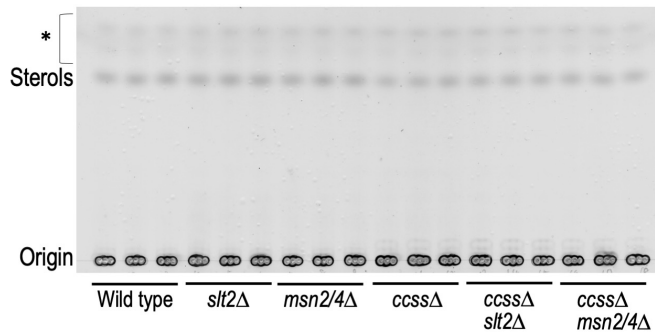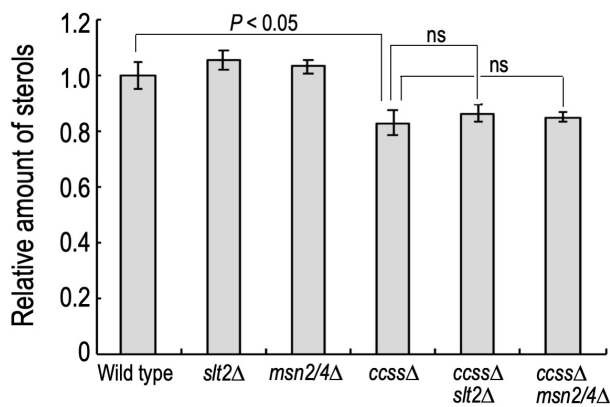

**Figure S9. Effect of deletion of *SLT2* or *MSN2/4* on the sterol levels.**

Cells were cultured overnight in YPD medium, diluted (0.3 OD<sub>600</sub> units/ml) in fresh YPD medium, and then incubated for 5 h at 30°C. Lipids were extracted, separated by TLC, and then visualized with a copper sulfate and orthophosphoric acid reagent. The intensity of band of sterols in wild-type cells was taken as 1. Data represent means ± SD for one experiment (triplicate) representative of three independent experiments. ns: no significant difference. The asterisk indicates unidentified bands. The details are given under Materials and Methods.

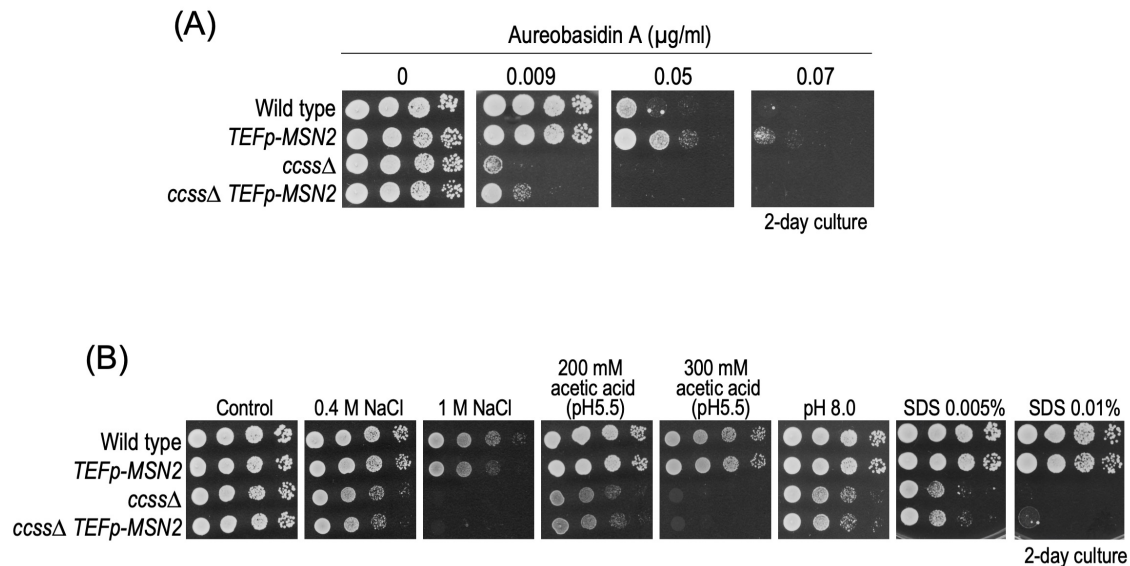

**Figure S10. Effects of overexpression of *MSN2* (*TEFp-MSN2*).**

(A) Cells cultured overnight in YPD medium at 30°C were spotted onto agar plates containing the indicated concentrations of aureobasidin A, an inhibitor of IPC synthase, and then incubated at 30°C for 2 days. *TEFp-MSN2* cells (BY4741, *TEFp-MSN2::natNT2*) are a mutant strain that overexpresses chromosomal *MSN2* under the control of a constitutive and strong TEF promoter (Yamaguchi *et al.*, 2018). (B) Effect of the overexpression on stress sensitivities. Cells cultured overnight in YPD medium were spotted onto YPD plates (the details of the composition of the medium are given in Fig. 2). Plates were incubated at 30°C for 2 days. The overexpression of *MSN2* hardly affected the increased stress sensitivities due to *ccssΔ* cells (*ccssΔ* versus *ccssΔ TEFp-MSN2* cells (BY4741, *csg1Δ::URA3 csh1Δ::LEU2 sur2Δ::kanMX4 scs7Δ::hphNT1 TEFp-MSN2::natNT2*)); however, it should be noted that the hypersensitivity to SDS was very slightly suppressed by *TEFp-MSN2*.

## REFERENCES

- Janke, C., Magiera, M.M., Rathfelder, N., Taxis, C., Reber, S., Maekawa, H., Moreno-Borchart, A., Doenges, G., Schwob, E., Schiebel, E., and Knop, M. (2004). A versatile toolbox for PCR-based tagging of yeast genes: new fluorescent proteins, more markers and promoter substitution cassettes. *Yeast* *21*, 947-962.
- Marchler, G., Schuller, C., Adam, G., and Ruis, H. (1993). A *Saccharomyces cerevisiae* UAS element controlled by protein kinase A activates transcription in response to a variety of stress conditions. *EMBO J* *12*, 1997-2003.
- Martinez-Arias, A., Yost, H.J., and Casadaban, M.J. (1984). Role of an upstream regulatory element in leucine repression of the *Saccharomyces cerevisiae* *leu2* gene. *Nature* *307*, 740-742.
- Otsu, M., Toume, M., Yamaguchi, Y., and Tani, M. (2020). Proper regulation of inositolphosphorylceramide levels is required for acquirement of low pH resistance in budding yeast. *Sci Rep* *10*, 10792.
- Sikorski, R.S., and Hieter, P. (1989). A system of shuttle vectors and yeast host strains designed for efficient manipulation of DNA in *Saccharomyces cerevisiae*. *Genetics* *122*, 19-27.
- Toume, M., and Tani, M. (2016). Yeast lacking the amphiphysin-family protein Rvs167 are sensitive to disruptions in sphingolipid levels. *FEBS J* *283*, 2911-2928.
- Yamaguchi, Y., Katsuki, Y., Tanaka, S., Kawaguchi, R., Denda, H., Ikeda, T., Funato, K., and Tani, M. (2018). Protective role of the HOG pathway against the growth defect caused by impaired biosynthesis of complex sphingolipids in yeast *Saccharomyces cerevisiae*. *Mol Microbiol* *107*, 363-386.
